# Supplementary material
Source: PubMed Central journal article supplement (PMC10056257)
Supplement: NIHMS1879530-supplement-supplementary_1.pdf [file NIHMS1879530-supplement-supplementary_1.pdf]

## SUPPORTING INFORMATION

### DESIGN, BIOLOGICAL EVALUATION, AND COMPUTER-AIDED ANALYSIS OF DIHYDROTHIAZEPINES AS SELECTIVE ANTICHLAMYDIAL AGENTS

Luana Janaína de Campos<sup>a</sup>, Mohamed A. Seleem<sup>a</sup>, Jiachen Feng<sup>a</sup>, Kelly Mari Pires de Oliveira<sup>b</sup>,  
João Vítor de Andrade dos Santos<sup>c</sup>, Shivdeep Hayer<sup>d</sup>, Jonathan B. Clayton<sup>d,e,f,g</sup>, Sharvath Kathi<sup>h</sup>,  
Derek J. Fisher<sup>h</sup>, Scot P. Ouellette<sup>i</sup>, Martin Conda-Sheridan<sup>a\*</sup>

<sup>a</sup>Department of Pharmaceutical Sciences, College of Pharmacy, University of Nebraska Medical Center  
Omaha, NE, 68198, USA.

<sup>b</sup>Faculty of Biological and Environmental Science, Federal University of Grande Dourados, Dourados,  
MS, 79804-970, Brazil.

<sup>c</sup>Faculty of Health Sciences, Federal University of Grande Dourados, Dourados, MS, 79804-970, Brazil.

<sup>d</sup>Department of Biology, University of Nebraska at Omaha, Omaha, NE, 68182, USA.

<sup>e</sup>Department of Food Science and Technology, University of Nebraska-Lincoln, Lincoln, NE, 68588,  
USA.

<sup>f</sup>Department of Pathology and Microbiology, University of Nebraska Medical Center, Omaha, NE, 68198,  
USA.

<sup>g</sup>Nebraska Food for Health Center, University of Nebraska-Lincoln, Lincoln, NE, 68508, USA.

<sup>h</sup>School of Biological Sciences, Southern Illinois University, Carbondale, IL, 62091, USA.

<sup>i</sup>Department of Pathology and Microbiology, College of Medicine, University of Nebraska Medical  
Center, Omaha, NE, 68198, USA.

Email: martin.condasheridan@unmc.edu

Phone: +1 402-559-9361

## Contents:

|                                                                                                                                        |     |
|----------------------------------------------------------------------------------------------------------------------------------------|-----|
| Detailing of the Antichlamydiaal potency in different unit measures .....                                                              | S3  |
| Detailing of the prediction accuracy of KPLS-radial 2D QSAR Model (radial 13) .....                                                    | S4  |
| Statistical parameters of the model generated by AutoQSAR Fingerprint (radial 13) - Kernel based partial least square regression ..... | S5  |
| Experimental versus KPLS-radial 2D QSAR model (radial 13) predicted values of antichlamydiaal activity (pIC <sub>50</sub> ). .....     | S5  |
| Color maps for the 2D fingerprint (radial 13) QSAR model for all the molecules used to generate the QSAR model .....                   | S6  |
| Dose-response curves for the effect of <b>5b</b> (a) and <b>5c</b> (b) reported as % of recovered IFU .....                            | S8  |
| Viability analysis for molecules <b>11d</b> and <b>11e</b> against HEp-2 cell line.....                                                | S9  |
| <sup>1</sup> H NMR, <sup>13</sup> C NMR, HPLC and HRMS Spectra of the synthesized Compounds .....                                      | S10 |

**Table S1.** Detailing of the Antichlamydial potency in different unit measures.

| <b>ID</b> | <b>IC<sub>50</sub> (µg/mL)</b> | <b>IC<sub>50</sub> (µM)</b> | <b>pIC<sub>50</sub></b> |
|-----------|--------------------------------|-----------------------------|-------------------------|
| 5a        | 1.61                           | 4.40                        | 5.36                    |
| 5b        | 3.32                           | 8.94                        | 5.05                    |
| 5c        | 4.69                           | 12.57                       | 4.90                    |
| 5e        | 5.18                           | 12.65                       | 4.90                    |
| 5d        | 4.79                           | 12.77                       | 4.89                    |
| 11b       | 6.93                           | 14.19                       | 4.85                    |
| 5g        | 6.37                           | 15.51                       | 4.81                    |
| 11a       | 6.53                           | 15.72                       | 4.80                    |
| 5f        | 6.35                           | 16.43                       | 4.78                    |
| 5k        | 7.44                           | 17.50                       | 4.76                    |
| 5h        | 6.59                           | 17.54                       | 4.76                    |
| 5l        | 7.50                           | 17.84                       | 4.75                    |
| 5j        | 7.18                           | 17.97                       | 4.75                    |
| 5i        | 6.72                           | 18.90                       | 4.72                    |
| 5y        | 7.36                           | 21.19                       | 4.67                    |
| 5n        | 9.00                           | 23.30                       | 4.63                    |
| 5m        | 9.00                           | 24.57                       | 4.61                    |
| 5o        | 10.21                          | 27.87                       | 4.56                    |
| 11c       | 12.30                          | 27.99                       | 4.55                    |
| 7a        | 10.00                          | 28.79                       | 4.54                    |
| 5q        | 14.69                          | 39.55                       | 4.40                    |
| 5p        | 14.41                          | 40.32                       | 4.40                    |
| 13a       | 14.99                          | 44.32                       | 4.35                    |
| 344       | 16.53                          | 46.24                       | 4.34                    |
| 6a        | 17.63                          | 49.45                       | 4.31                    |
| 9a        | 16.08                          | 49.73                       | 4.30                    |
| 5s        | 22.76                          | 50.86                       | 4.29                    |
| 13c       | 22.60                          | 53.91                       | 4.27                    |
| 9b        | 21.35                          | 57.35                       | 4.24                    |
| 13b       | 20.88                          | 59.77                       | 4.22                    |
| 9c        | 21.45                          | 69.78                       | 4.16                    |
| 11d       | 0.70                           | 1.61                        | 5.79                    |
| 11e       | 1.08                           | 2.46                        | 5.60                    |
| 5x        | 2.78                           | 7.82                        | 5.10                    |

**Table S2.** Detailing of the prediction accuracy of KPLS-radial 2D QSAR Model (radial 13).

| <b>ID</b> | <b>Set</b>  | <b>Y(Exp)</b> | <b>Y(Pred)</b> | <b>Error</b> |
|-----------|-------------|---------------|----------------|--------------|
| 5a        | train       | 5.36          | 5.14           | -0.22        |
| 5b        | train       | 5.05          | 5.04           | -0.01        |
| 5c        | <b>test</b> | 4.90          | 4.89           | -0.01        |
| 5e        | train       | 4.90          | 4.90           | 0.00         |
| 5d        | <b>test</b> | 4.89          | 4.77           | -0.12        |
| 11b       | train       | 4.85          | 4.75           | -0.10        |
| 5g        | train       | 4.81          | 4.97           | 0.16         |
| 11a       | train       | 4.80          | 4.91           | 0.11         |
| 5f        | train       | 4.78          | 4.74           | -0.05        |
| 5k        | train       | 4.76          | 4.66           | -0.10        |
| 5h        | <b>test</b> | 4.76          | 4.63           | -0.13        |
| 5l        | train       | 4.75          | 4.63           | -0.12        |
| 5j        | train       | 4.75          | 4.56           | -0.19        |
| 5i        | train       | 4.72          | 4.52           | -0.20        |
| 5y        | train       | 4.67          | 4.80           | 0.13         |
| 5n        | <b>test</b> | 4.63          | 4.59           | -0.04        |
| 5m        | train       | 4.61          | 4.72           | 0.11         |
| 5o        | train       | 4.56          | 4.52           | -0.03        |
| 11c       | train       | 4.55          | 4.58           | 0.03         |
| 7a        | <b>test</b> | 4.54          | 4.51           | -0.03        |
| 5q        | train       | 4.40          | 4.46           | 0.06         |
| 5p        | test        | 4.40          | 4.44           | 0.05         |
| 13a       | train       | 4.35          | 4.35           | -0.01        |
| 344       | train       | 4.34          | 4.59           | 0.25         |
| 6a        | train       | 4.31          | 4.44           | 0.14         |
| 9a        | train       | 4.30          | 4.16           | -0.14        |
| 5s        | train       | 4.29          | 4.41           | 0.12         |
| 13c       | <b>test</b> | 4.27          | 4.37           | 0.10         |
| 9b        | train       | 4.24          | 4.23           | -0.01        |
| 13b       | train       | 4.22          | 4.32           | 0.10         |
| 9c        | train       | 4.16          | 4.13           | -0.03        |

\*Biological activity displayed (both experimental and predicted) are presented in pIC<sub>50</sub> format.

**Table S3.** Statistical parameters of the model generated by AutoQSAR Fingerprint (radial 13) - Kernel based partial least square regression.

|                               | Training set |      |                | Test set |                |
|-------------------------------|--------------|------|----------------|----------|----------------|
|                               | Score        | SD   | R <sup>2</sup> | RMSE     | Q <sup>2</sup> |
| <b>Model KPLS - radial 13</b> | 0.83         | 0.13 | 0.83           | 0.08     | 0.87           |
| <b>Reference Value</b>        | -            | -    | >0.6           | -        | >0.5           |

As presented in Table S3, the obtained model displays satisfactory statistical results. The correlation coefficient ( $R^2$ ) is a measure of the data explained by the model. The acceptable  $R^2$  value for regression models is  $>0.6$  (more than 60% of the explained variance).<sup>1</sup> The predictability of the model in the test set was tested by the coefficient of determination between the observed and predicted biological activities for the test set ( $Q^2$ ).<sup>2</sup> This last parameter should have a minimum acceptable value of 0.5 indicating 50% prediction of variability. The difference between  $R^2$  and  $Q^2$  should be less than 0.1 because higher values may indicate overfitting of the model.<sup>3</sup> Further, the standard deviation of the regression (SD) calculated based on the training set and the root mean square error in the test set predictions (RMSE)<sup>4</sup> expresses the variability not explained by the model, and thus should have the lowest possible value.<sup>4,5</sup> The score value presented in Table 5 is an internal parameter from AutoQSAR calculated by the software to guide the user decision regarding the best model among the ones generated.<sup>6</sup>

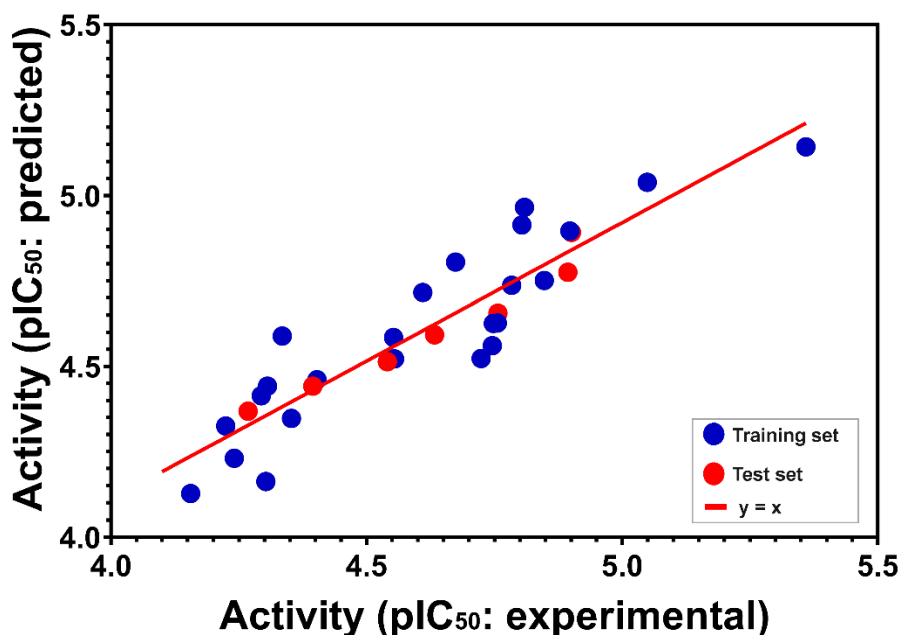

**Figure S1.** Experimental versus KPLS-radial 2D QSAR model (radial 13) predicted values of antichlamydial activity ( $pIC_{50}$ ).

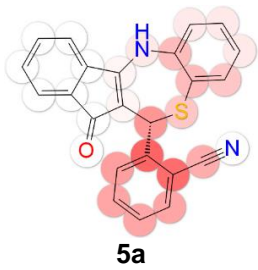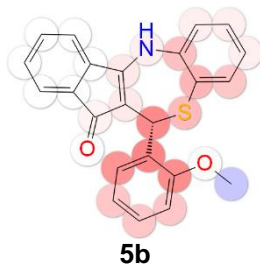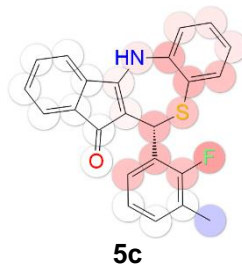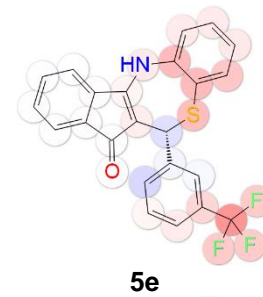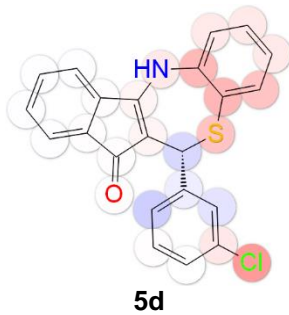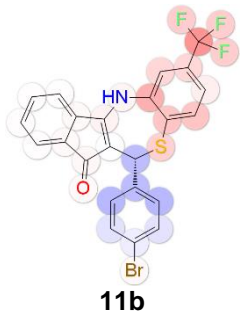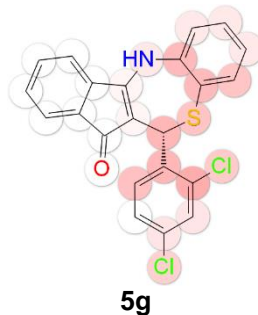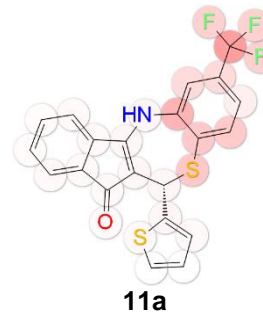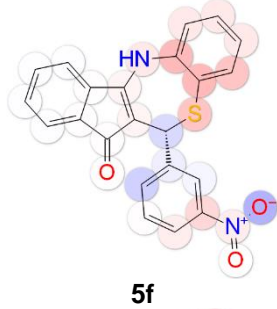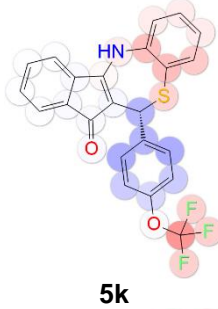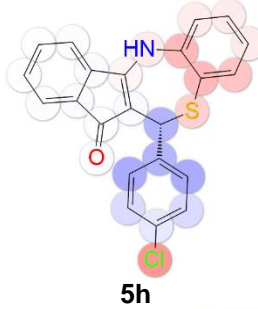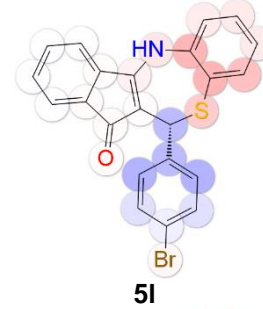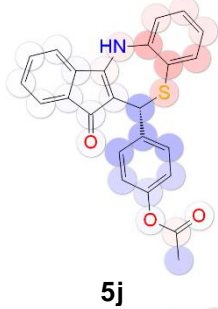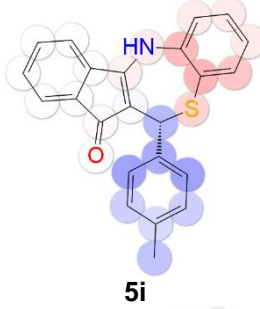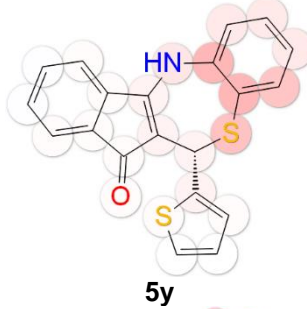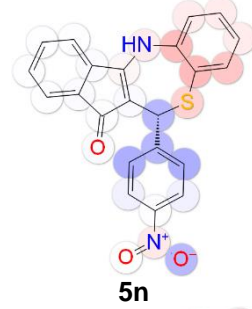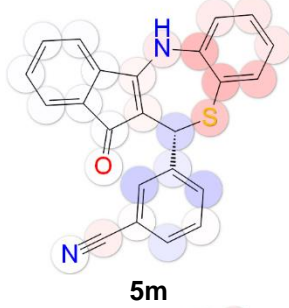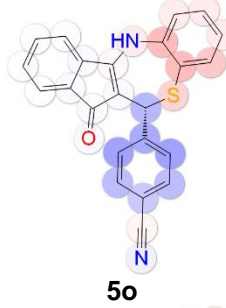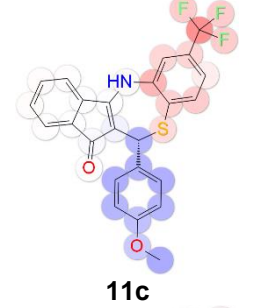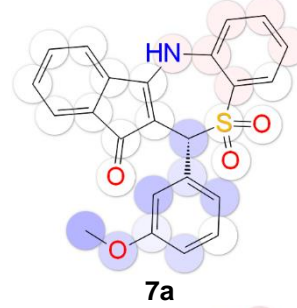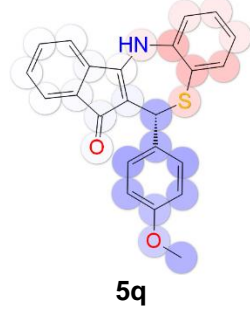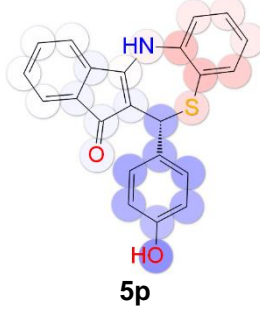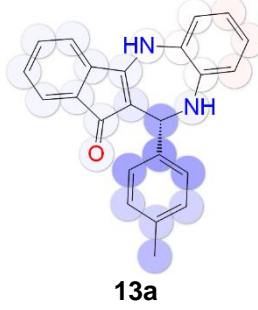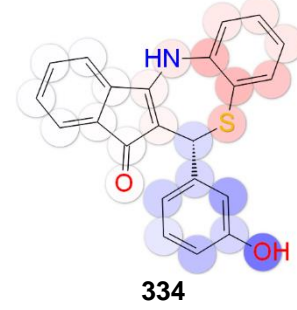

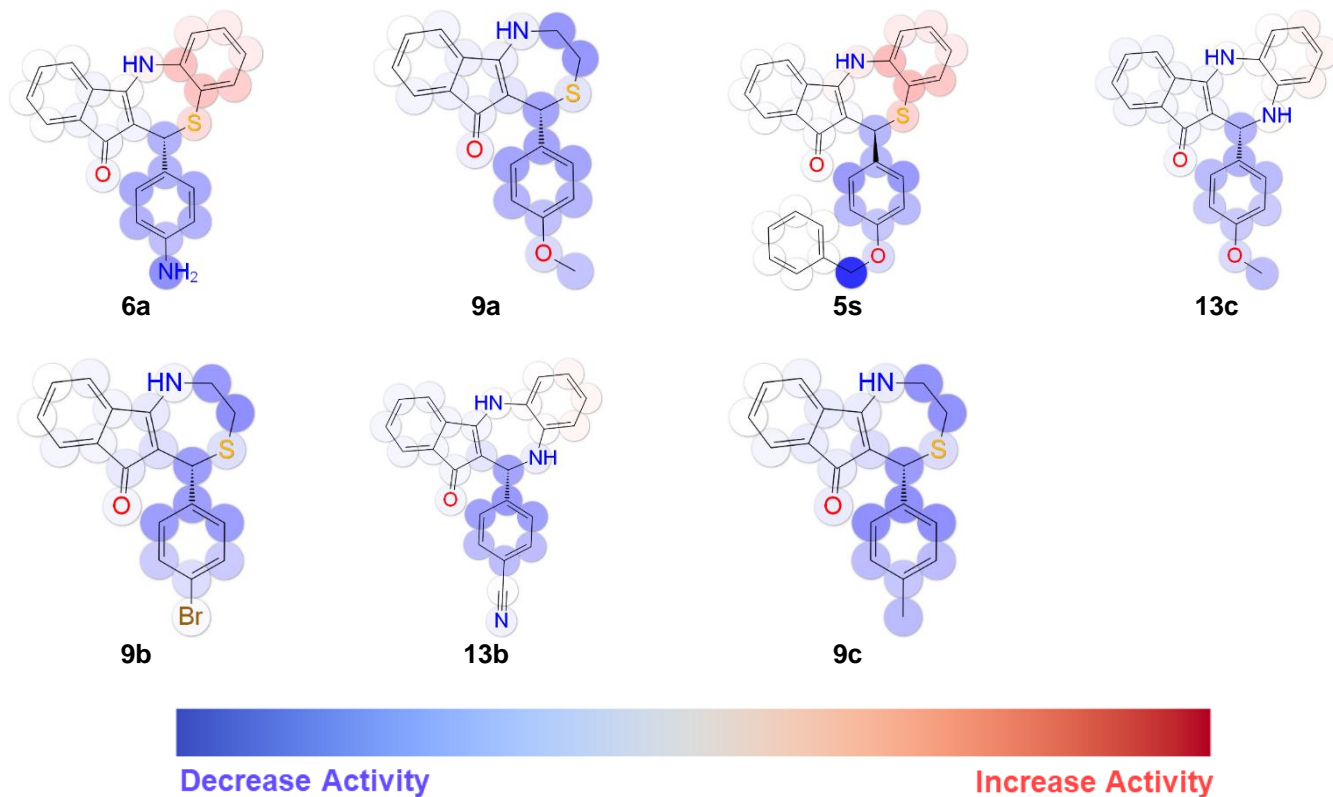

**Figure S2.** Color maps for the 2D fingerprint (radial 13) QSAR model for all the molecules used to generate the QSAR model. Atoms that display a favorable contribution to the antichlamydial activity are colored red and unfavorable are colored blue. Color intensity reflects the strength of the effect. Note<sub>1</sub>: stereochemistry is displayed because the molecules are drawn as 3D form, which is required for Maestro software to display the QSAR color maps. However, stereochemistry is not considered in the generation of the 2D descriptors used to build the model. Note<sub>2</sub>: Only molecules with a determined value of antichlamydial activity were used to generate the QSAR model. Therefore, molecules with no inhibition seen within the concentration range tested (25 -0.39  $\mu\text{g/mL}$ ) are not included.

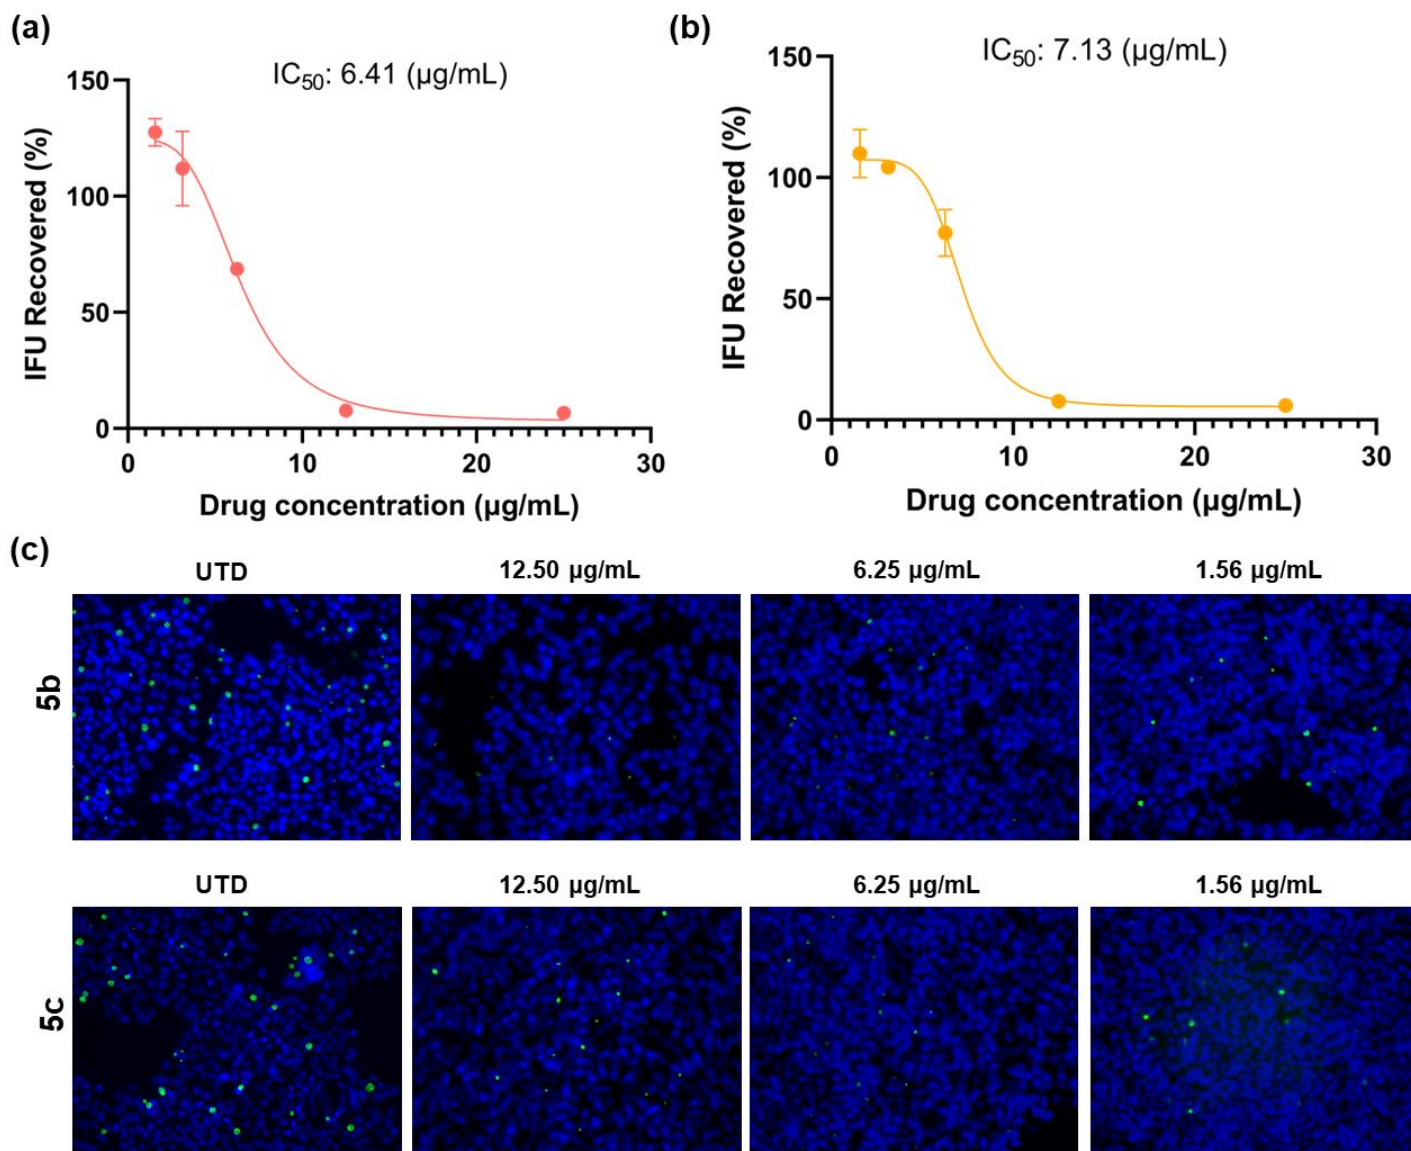

**Figure S3.** Dose–response curves for the effect of **5b** (a) and **5c** (b) reported as % of recovered IFU. Error bars report SEM (N = 3). (c): immunofluorescence images of **5b** and **5c** inhibitory effect. Chlamydial inclusions are displayed in green (MOMP - Ctr L2) and HEP-2 cell nuclei in blue (DAPI). Images were acquired on 20x magnification using an Olympus CKX53 fluorescence microscope with EP50 camera. Channel merge was processed using ImageJ software. UTD: untreated; AZM: Azithromycin. Omitted error bars indicates a SD value shorter than the size of the symbol presented in the plots.



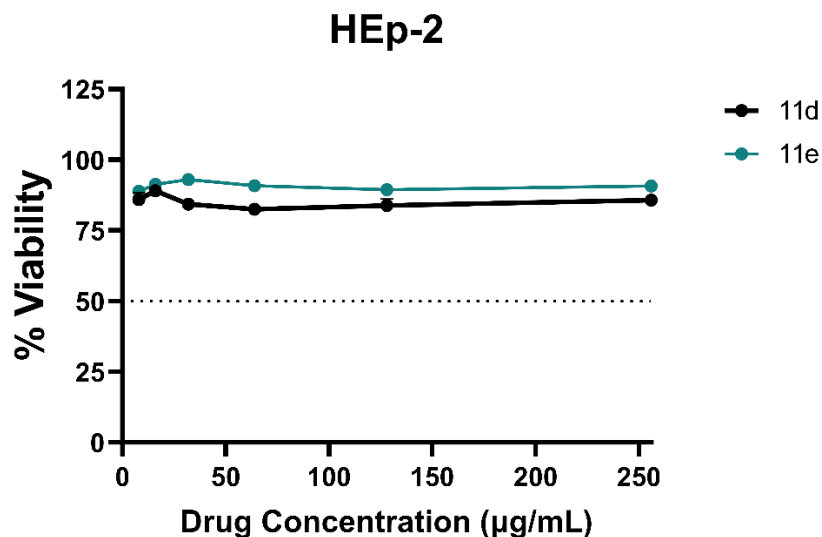

**Figure S4.** Viability analysis for molecules **11d** and **11e** against HEp-2 cell line. Error bars report SEM (N = 3). Each experiment included technical replicates. Omitted error bars indicates a SD value shorter than the size of the symbol presented in the plots.

## REFERENCES

- (1) Alexander, D. L. J.; Tropsha, A.; Winkler, D. A. Beware of R<sup>2</sup>: Simple, Unambiguous Assessment of the Prediction Accuracy of QSAR and QSPR Models. *J. Chem. Inf. Model.* **2015**, *55* (7), 1316-1322.
- (2) Golbraikh, A.; Tropsha, A. Beware of q<sup>2</sup>! *J. Mol. Graph. Model.* **2002**, *20* (4), 269-276.
- (3) Chirico, N.; Gramatica, P. Real External Predictivity of QSAR Models. Part 2. New Intercomparable Thresholds for Different Validation Criteria and the Need for Scatter Plot Inspection. *J. Chem. Inf. Model.* **2012**, *52* (8), 2044-2058.
- (4) Gramatica, P. Principles of QSAR models validation: internal and external. *QSAR & Comb. Sci.* **2007**, *26* (5), 694-701.
- (5) Kiralj, R.; Ferreira, M. M. C. Basic validation procedures for regression models in QSAR and QSPR studies: theory and application. *J. Braz. Chem. Soc.* **2009**, *20* (4).
- (6) Dixon, S. L.; Duan, J.; Smith, E.; Barga, C. D. V.; Sherman, W.; Repasky, M. P. AutoQSAR: an automated machine learning tool for best-practice quantitative structure–activity relationship modeling. *Future Med. Chem.* **2016**, *8* (15), 1825-1839.

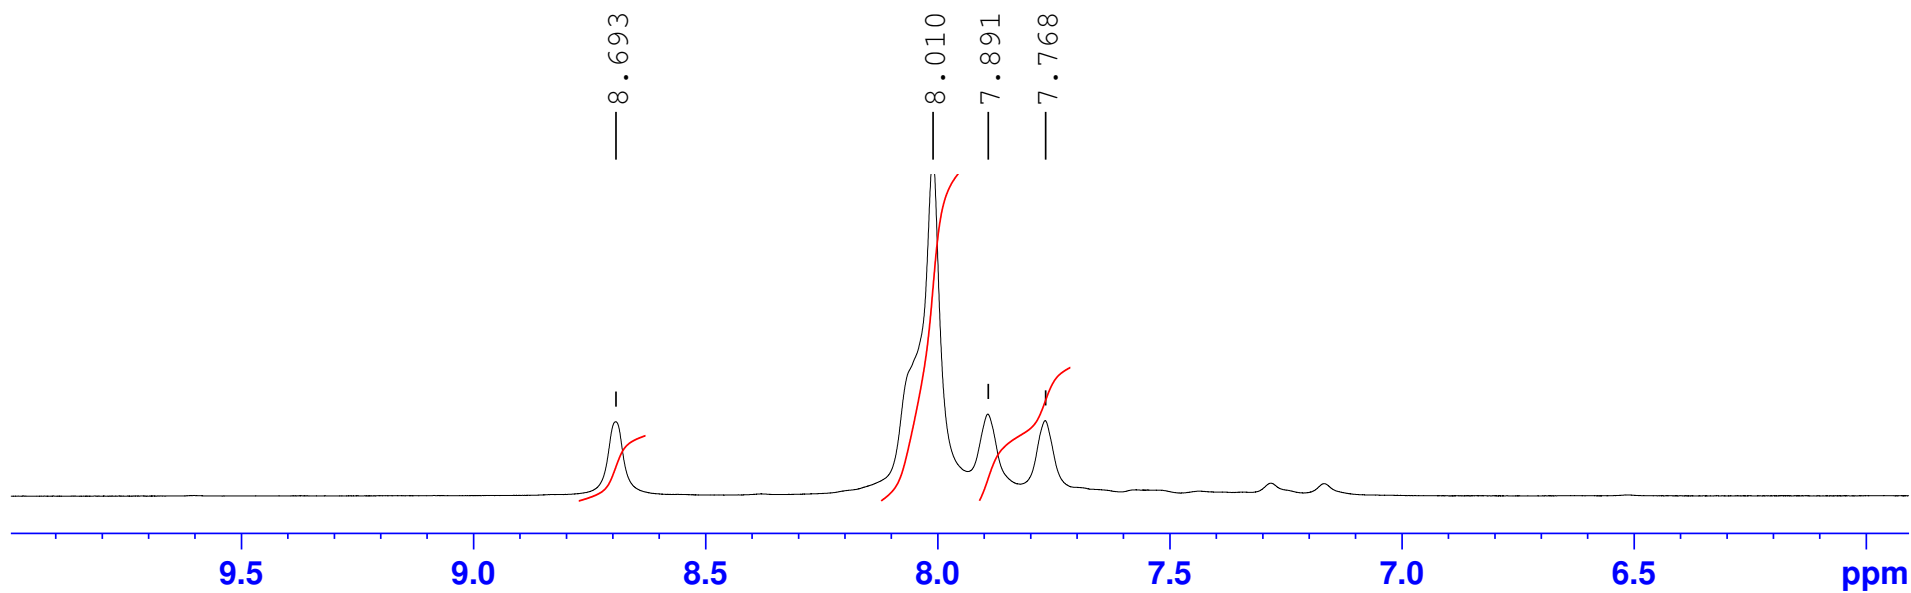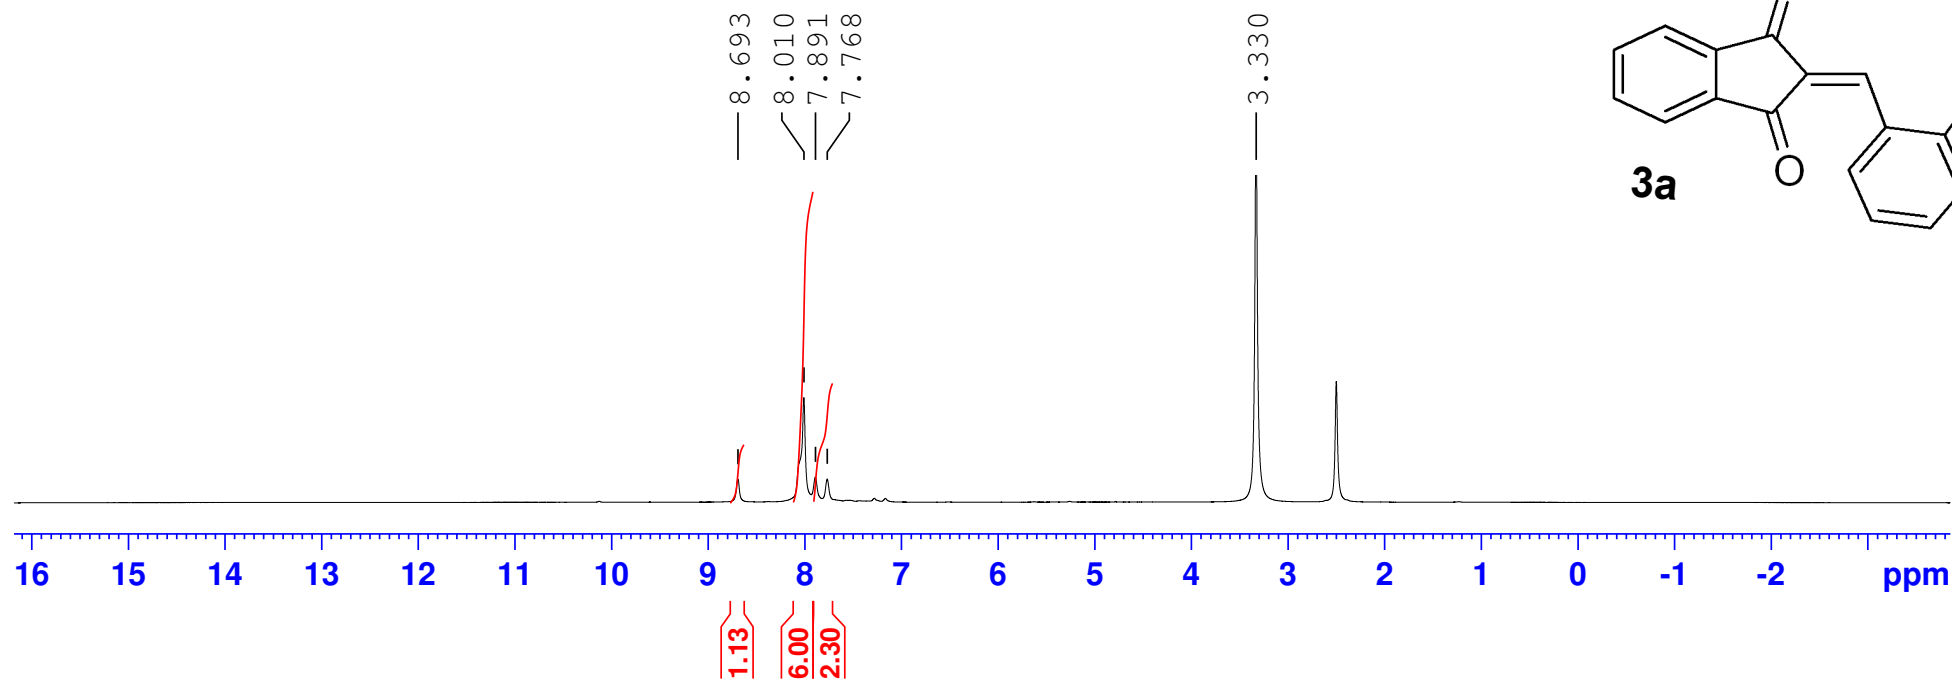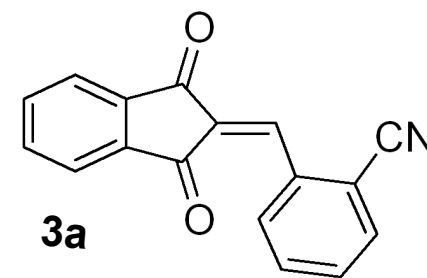

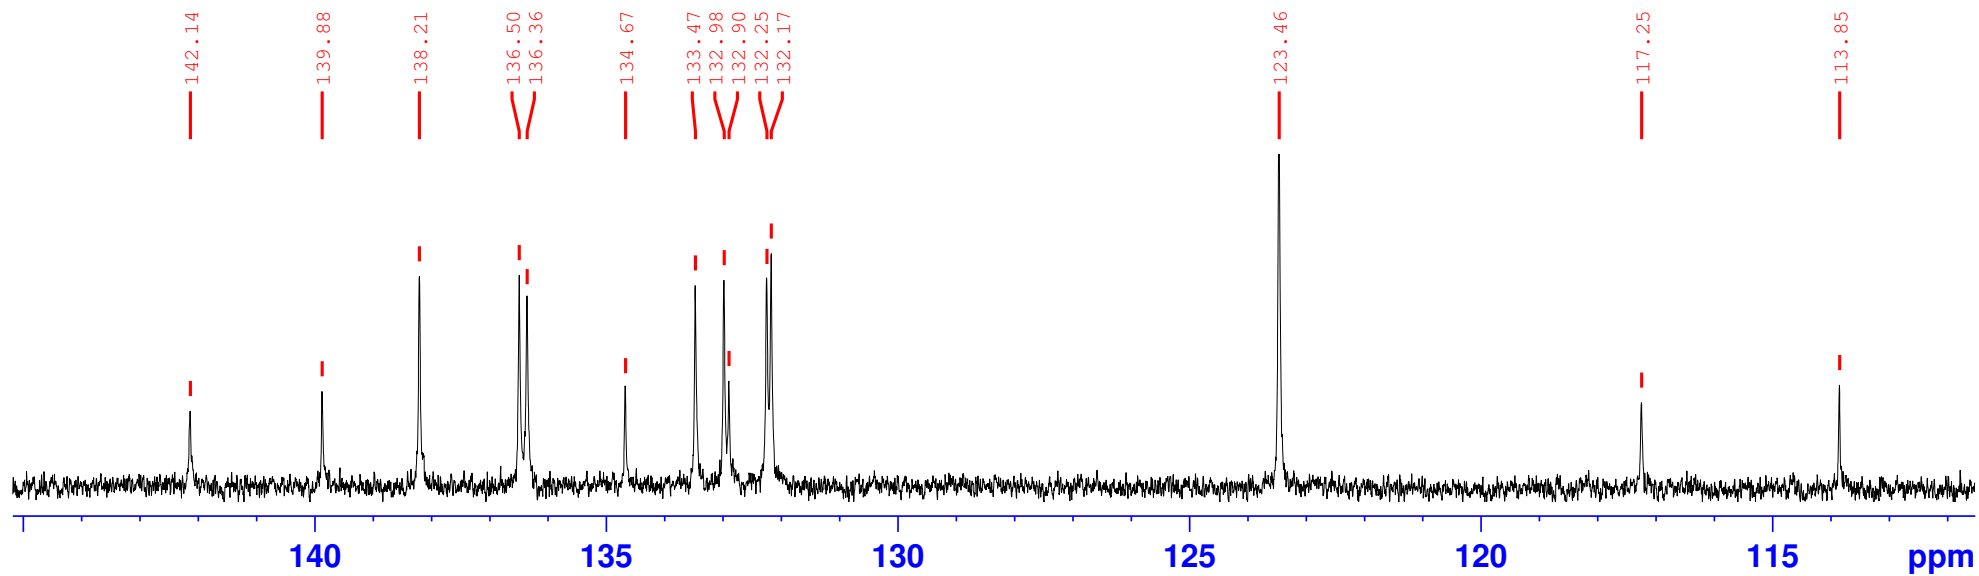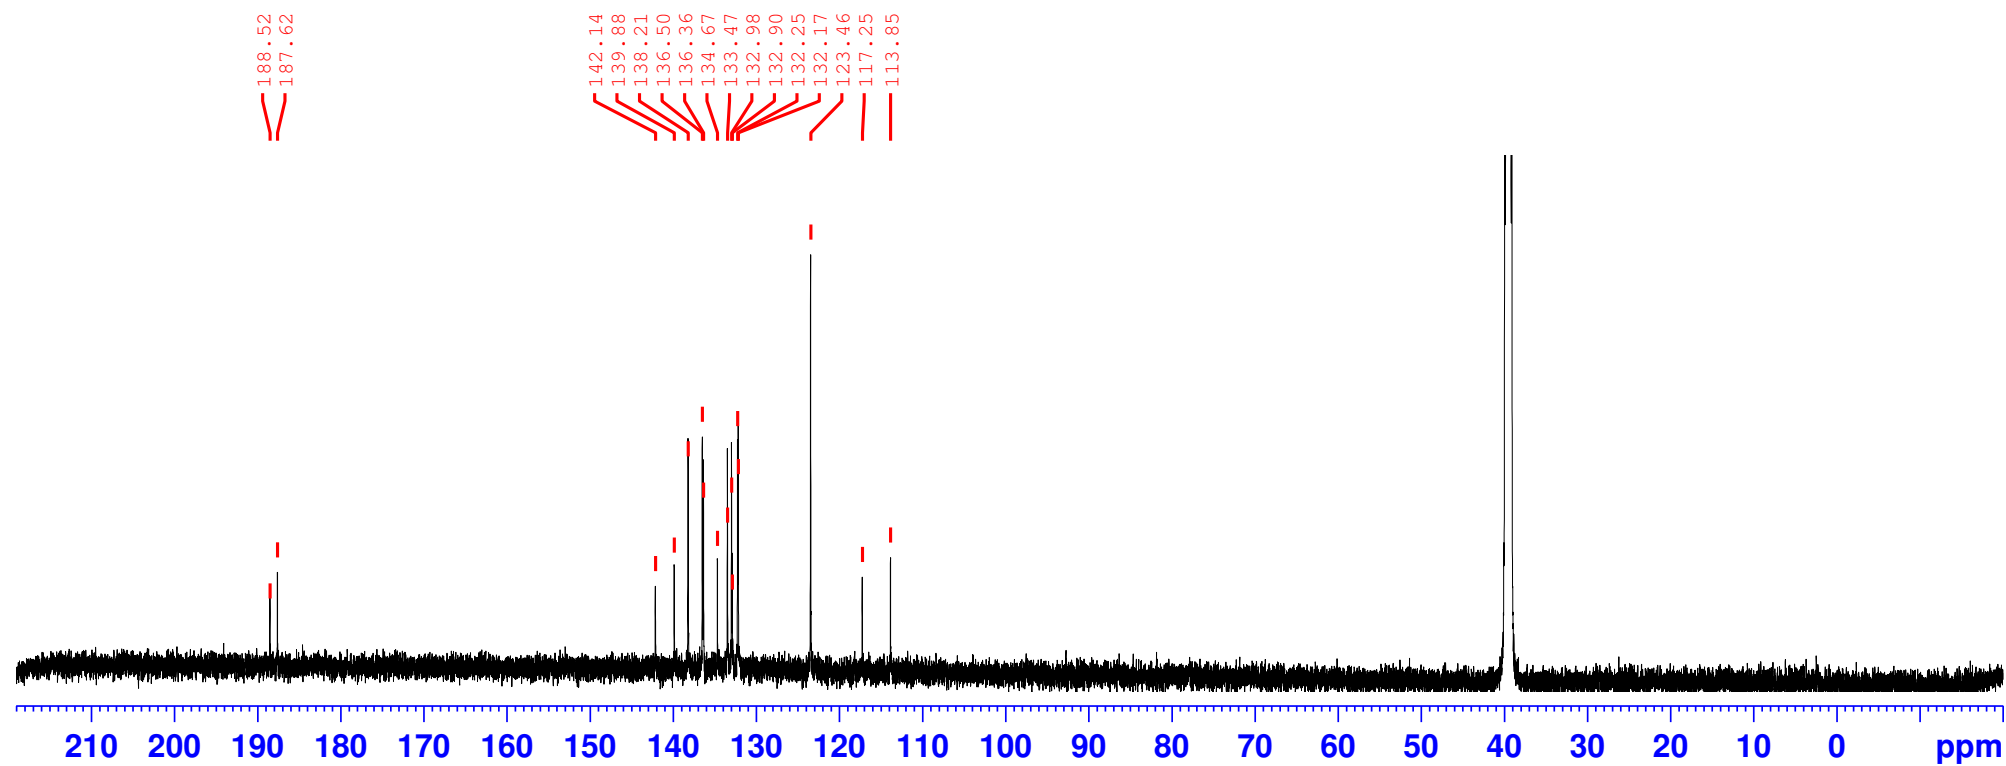



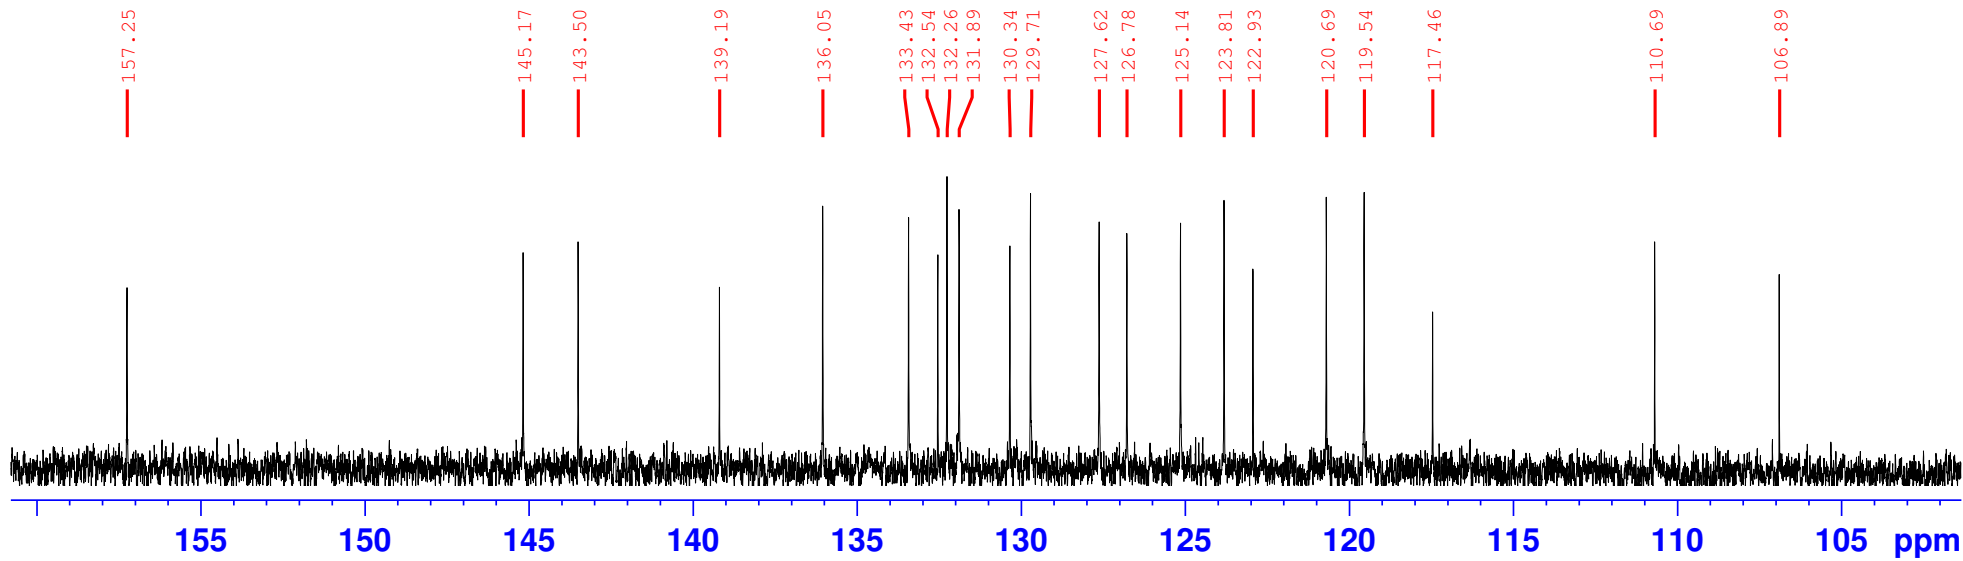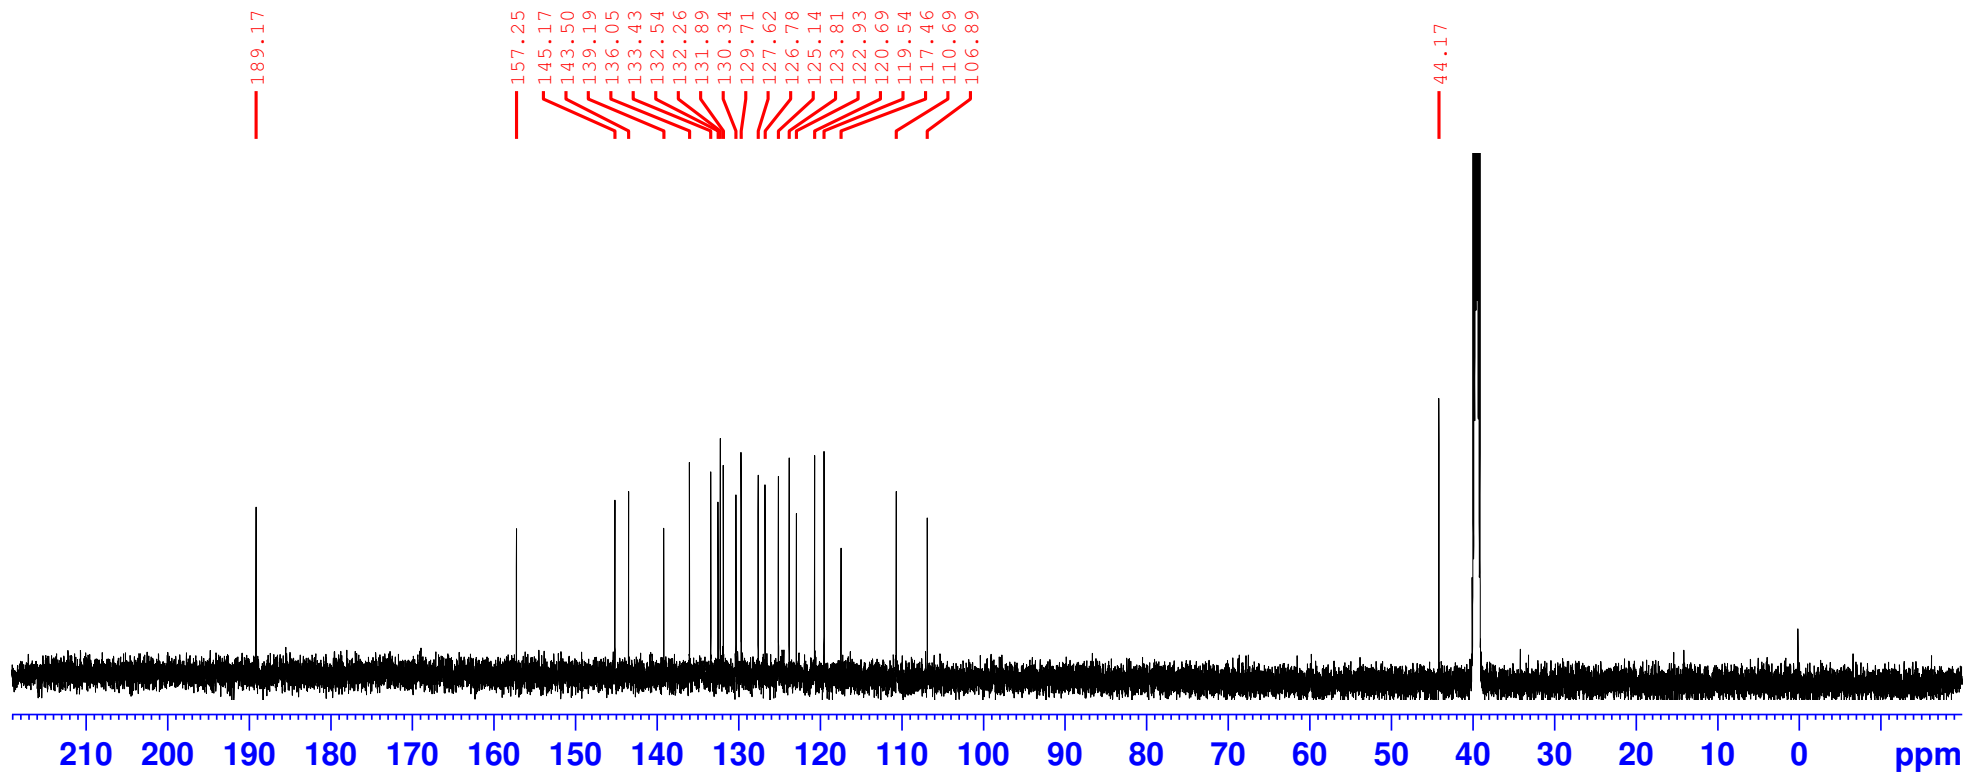

# User Spectrum Plot Report

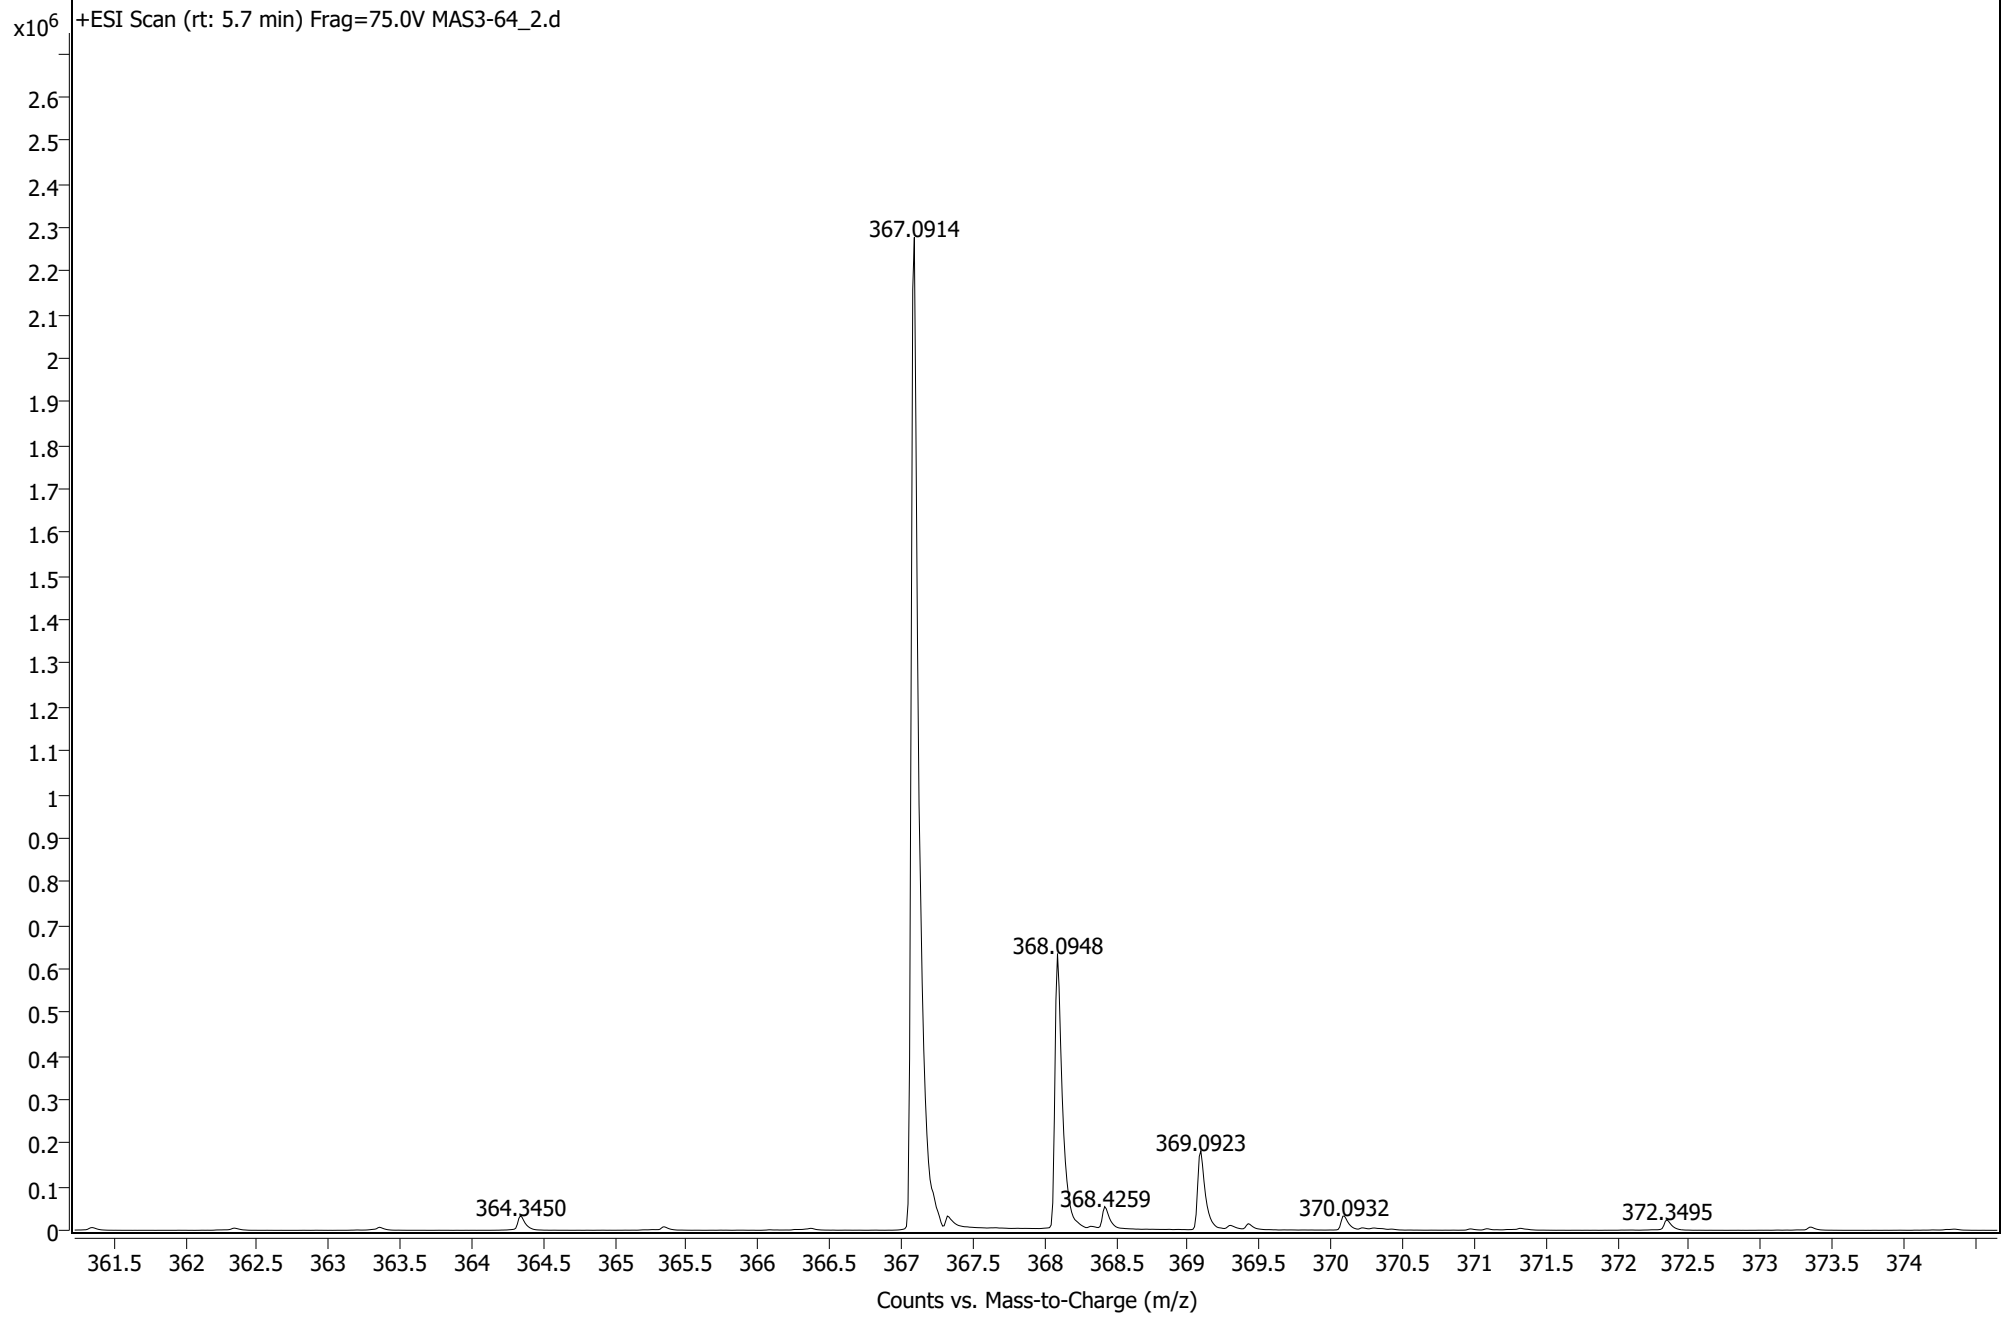

Sample Name: 3-64 thrid s

```

=====
Acq. Operator   : SYSTEM                      Seq. Line :    2
Acq. Instrument : 1220 HPLC                    Location  :   41
Injection Date  : 3/16/2022 9:44:48 AM       Inj       :    1
                                                Inj Volume: 70.000 µl
Different Inj Volume from Sample Entry! Actual Inj Volume : 50.000 µl
Method          : C:\Chem32\1\Data\luana 2022-03-16 09-20-50\Luana_small_molecule.M (Sequence
                :                               Method)
Last changed    : 3/16/2022 9:20:54 AM by SYSTEM
Method Info     : MeOH/water
    
```

Sample Info : 3-64 thrid s

Additional Info : Peak(s) manually integrated

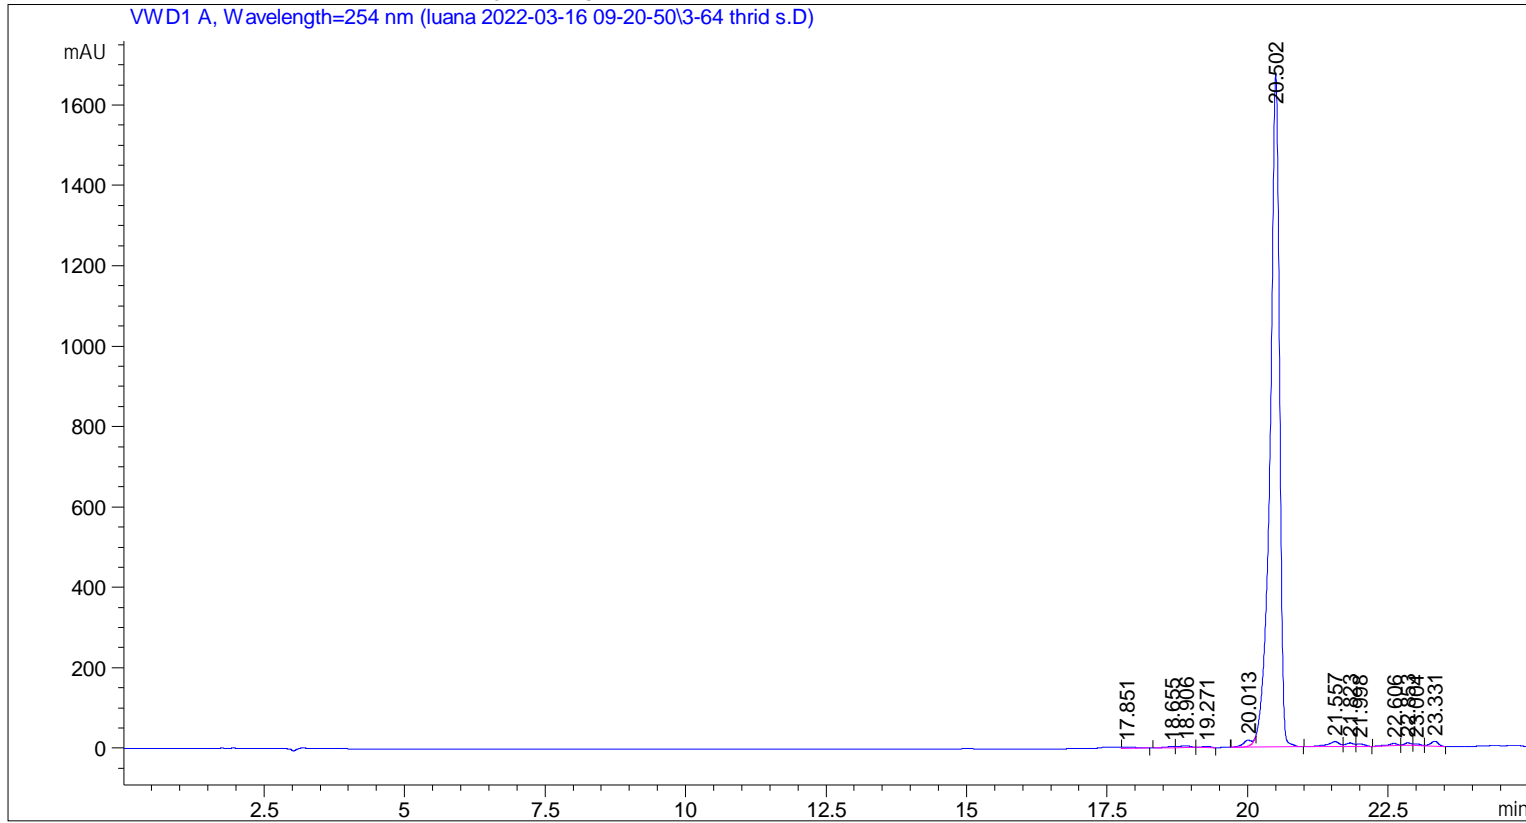

Area Percent Report

```

Sorted By      :      Signal
Multiplier     :      1.0000
Dilution      :      1.0000
Use Multiplier & Dilution Factor with ISTDs
    
```

Signal 1: VWD1 A, Wavelength=254 nm

| Peak # | RetTime [min] | Type | Width [min] | Area [mAU*s] | Height [mAU] | Area % |
|--------|---------------|------|-------------|--------------|--------------|--------|
| 1      | 17.851        | VB   | 0.2405      | 40.38155     | 2.27006      | 0.1983 |
| 2      | 18.655        | BV   | 0.1952      | 29.20976     | 2.39666      | 0.1434 |
| 3      | 18.906        | VB   | 0.2195      | 59.41207     | 4.26626      | 0.2917 |
| 4      | 19.271        | BB   | 0.1513      | 31.89454     | 3.25437      | 0.1566 |

| Peak # | RetTime [min] | Type | Width [min] | Area [mAU*s] | Height [mAU] | Area %  |
|--------|---------------|------|-------------|--------------|--------------|---------|
| 5      | 20.013        | BV E | 0.1550      | 157.97557    | 14.86624     | 0.7757  |
| 6      | 20.502        | VB R | 0.1714      | 1.94255e4    | 1673.27173   | 95.3898 |
| 7      | 21.557        | BV   | 0.2184      | 197.02502    | 12.53508     | 0.9675  |
| 8      | 21.823        | VV   | 0.1556      | 94.62735     | 8.93035      | 0.4647  |
| 9      | 21.998        | VB   | 0.1626      | 63.78162     | 6.27615      | 0.3132  |
| 10     | 22.606        | BB   | 0.1515      | 53.95757     | 5.31438      | 0.2650  |
| 11     | 22.853        | BV   | 0.1274      | 52.95997     | 6.40889      | 0.2601  |
| 12     | 23.004        | VV   | 0.1218      | 38.99666     | 4.85115      | 0.1915  |
| 13     | 23.331        | VB   | 0.1472      | 118.61198    | 12.44820     | 0.5825  |

Totals :                                   2.03643e4  1757.08952

=====  
\*\*\* End of Report \*\*\*



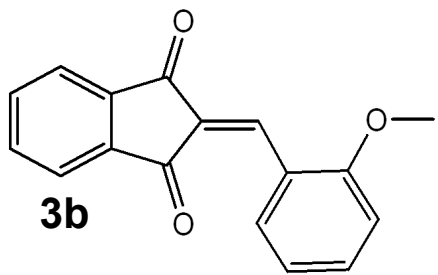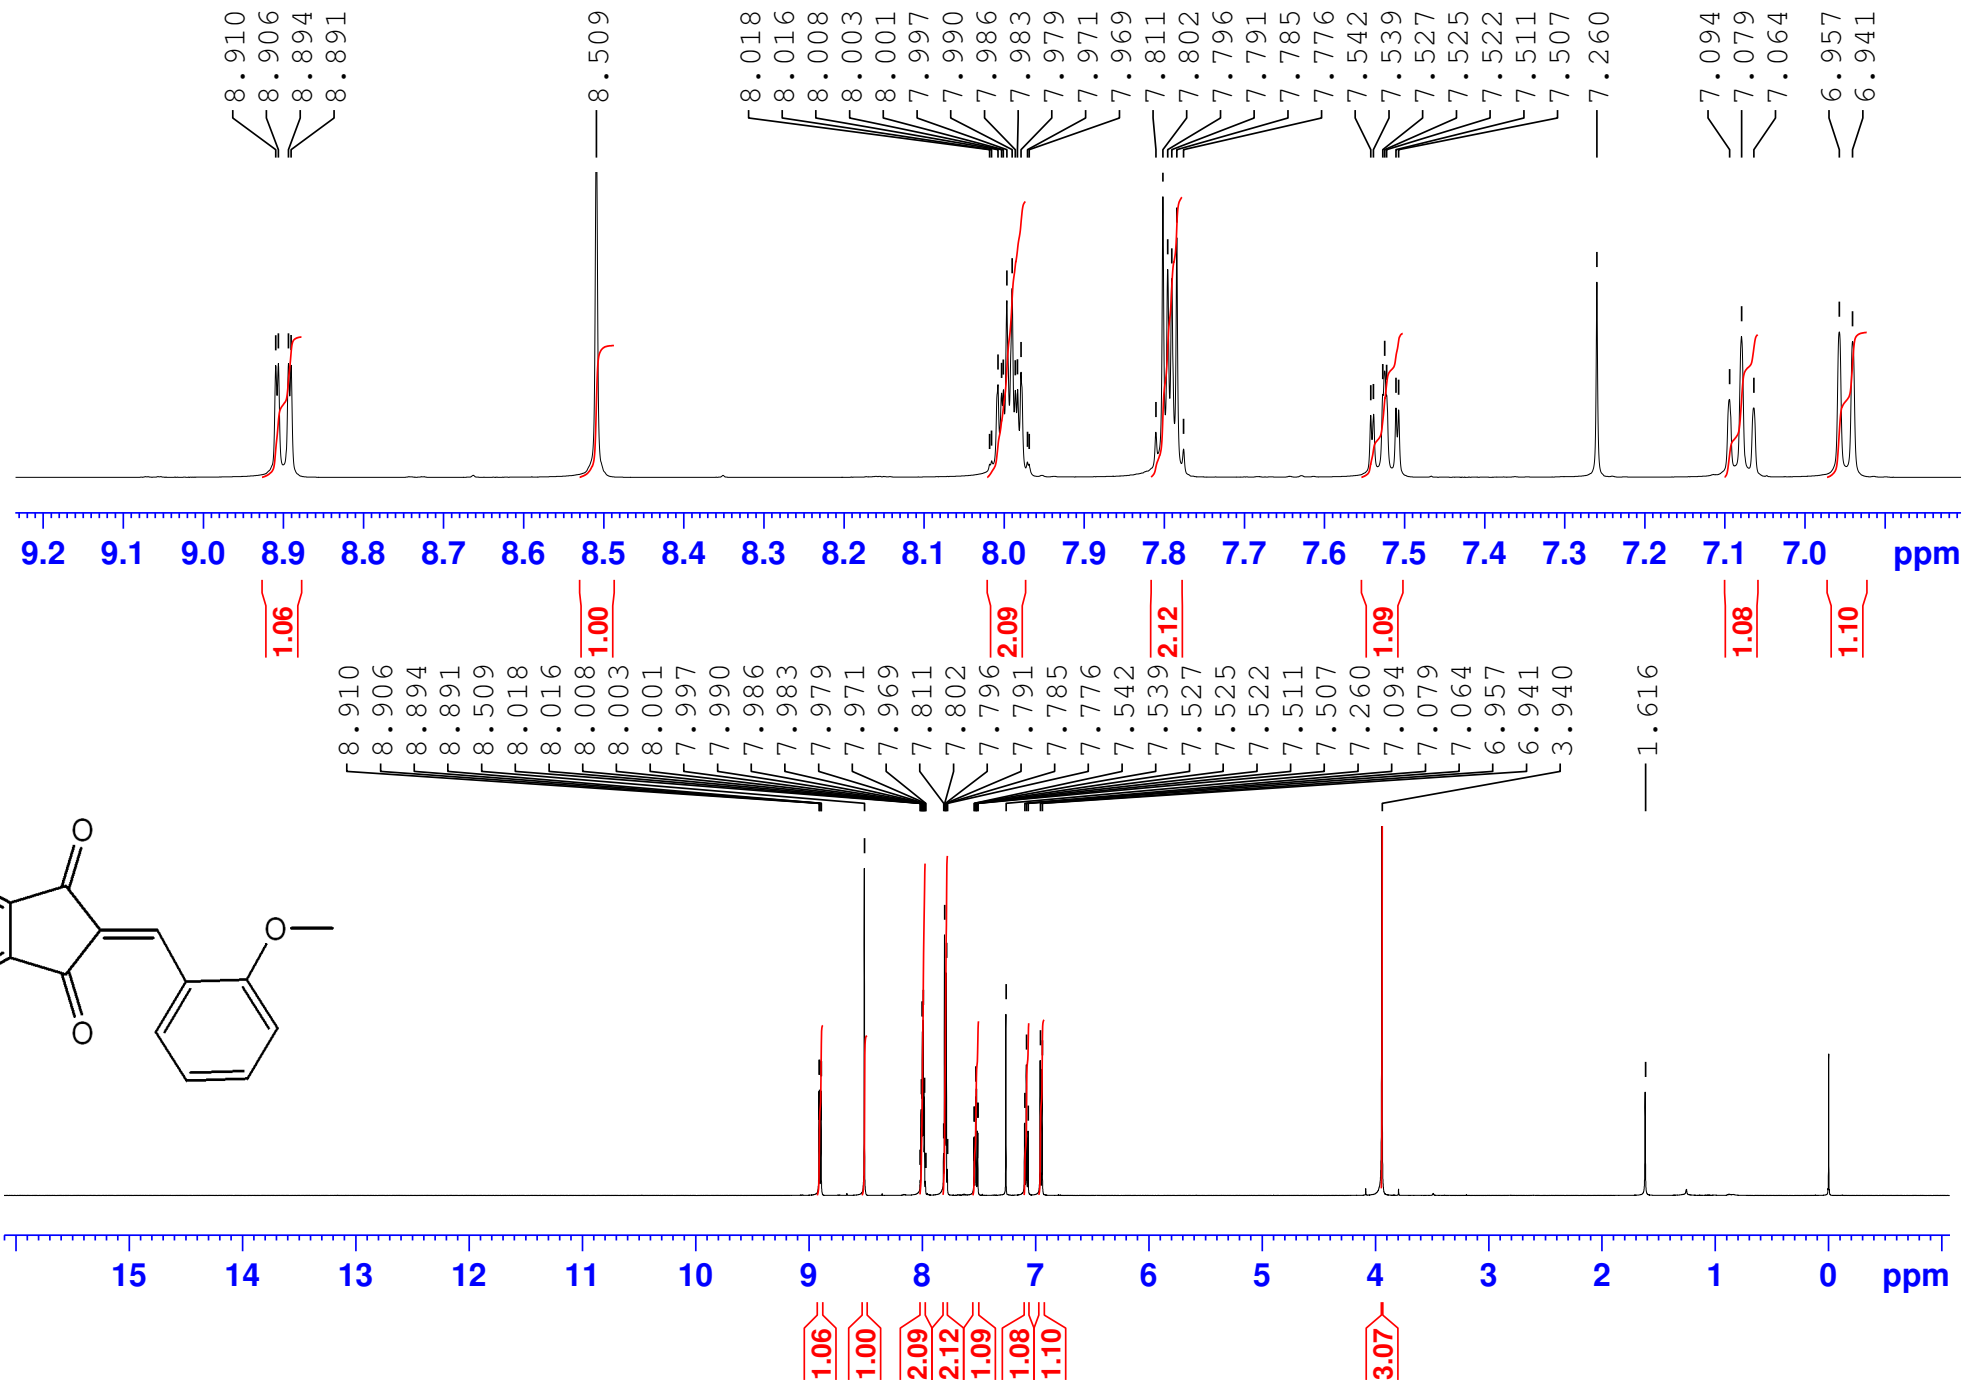

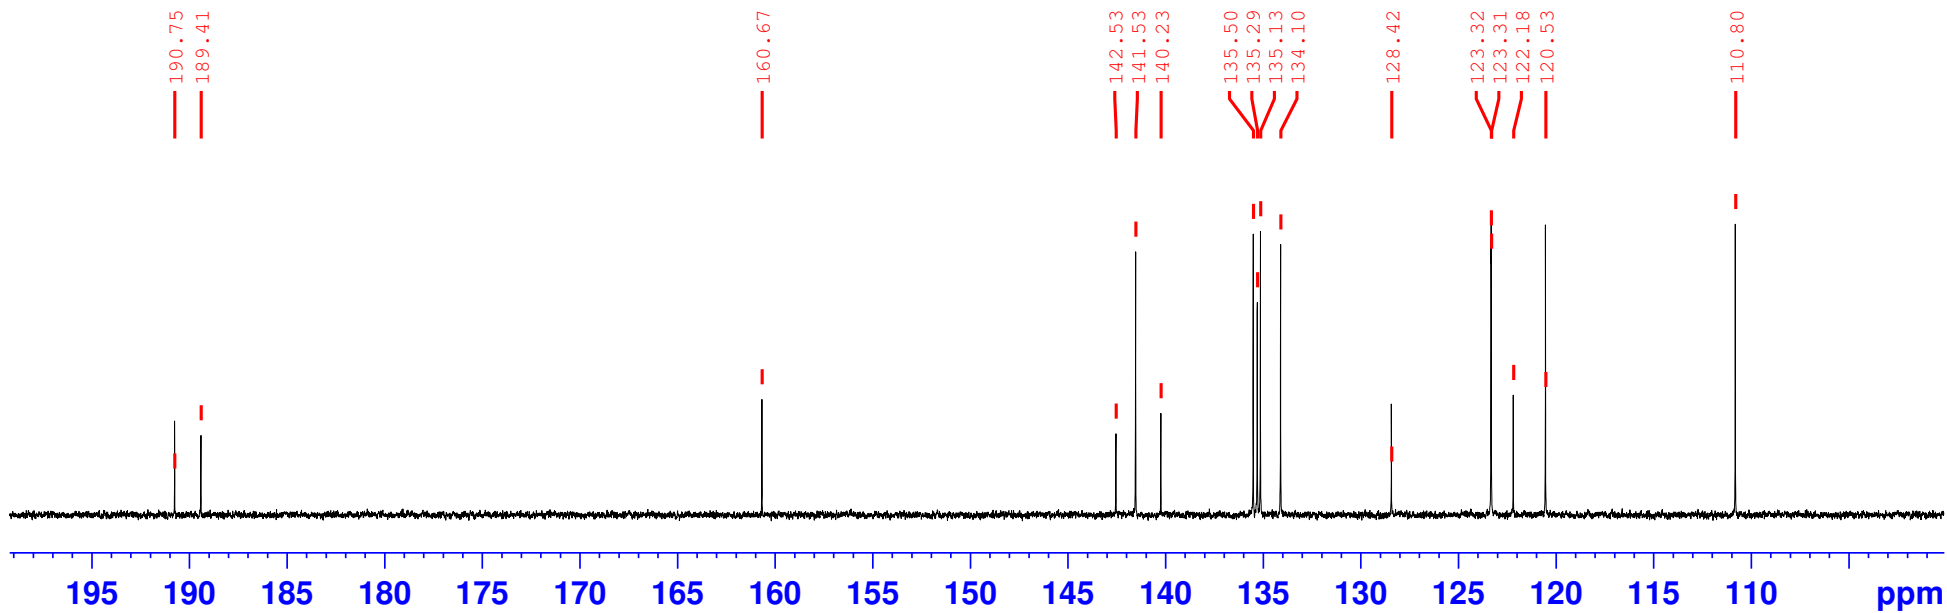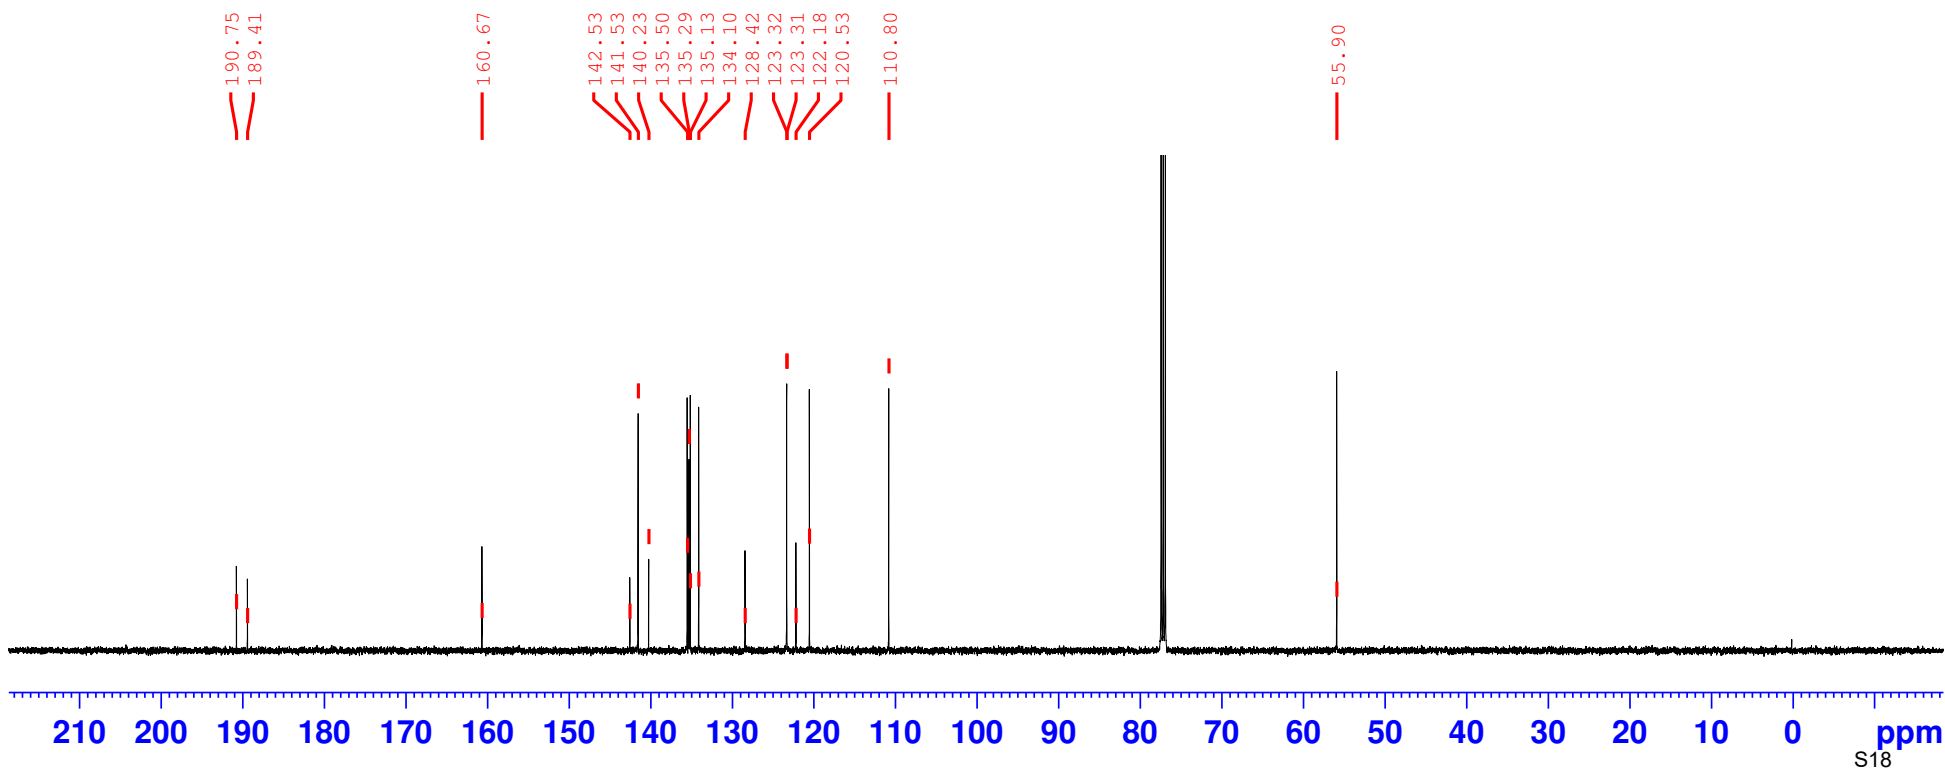

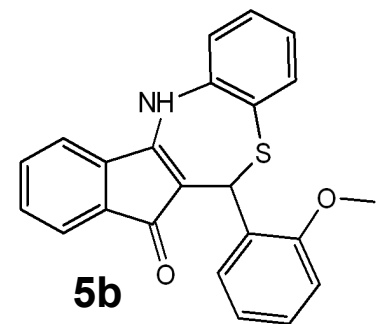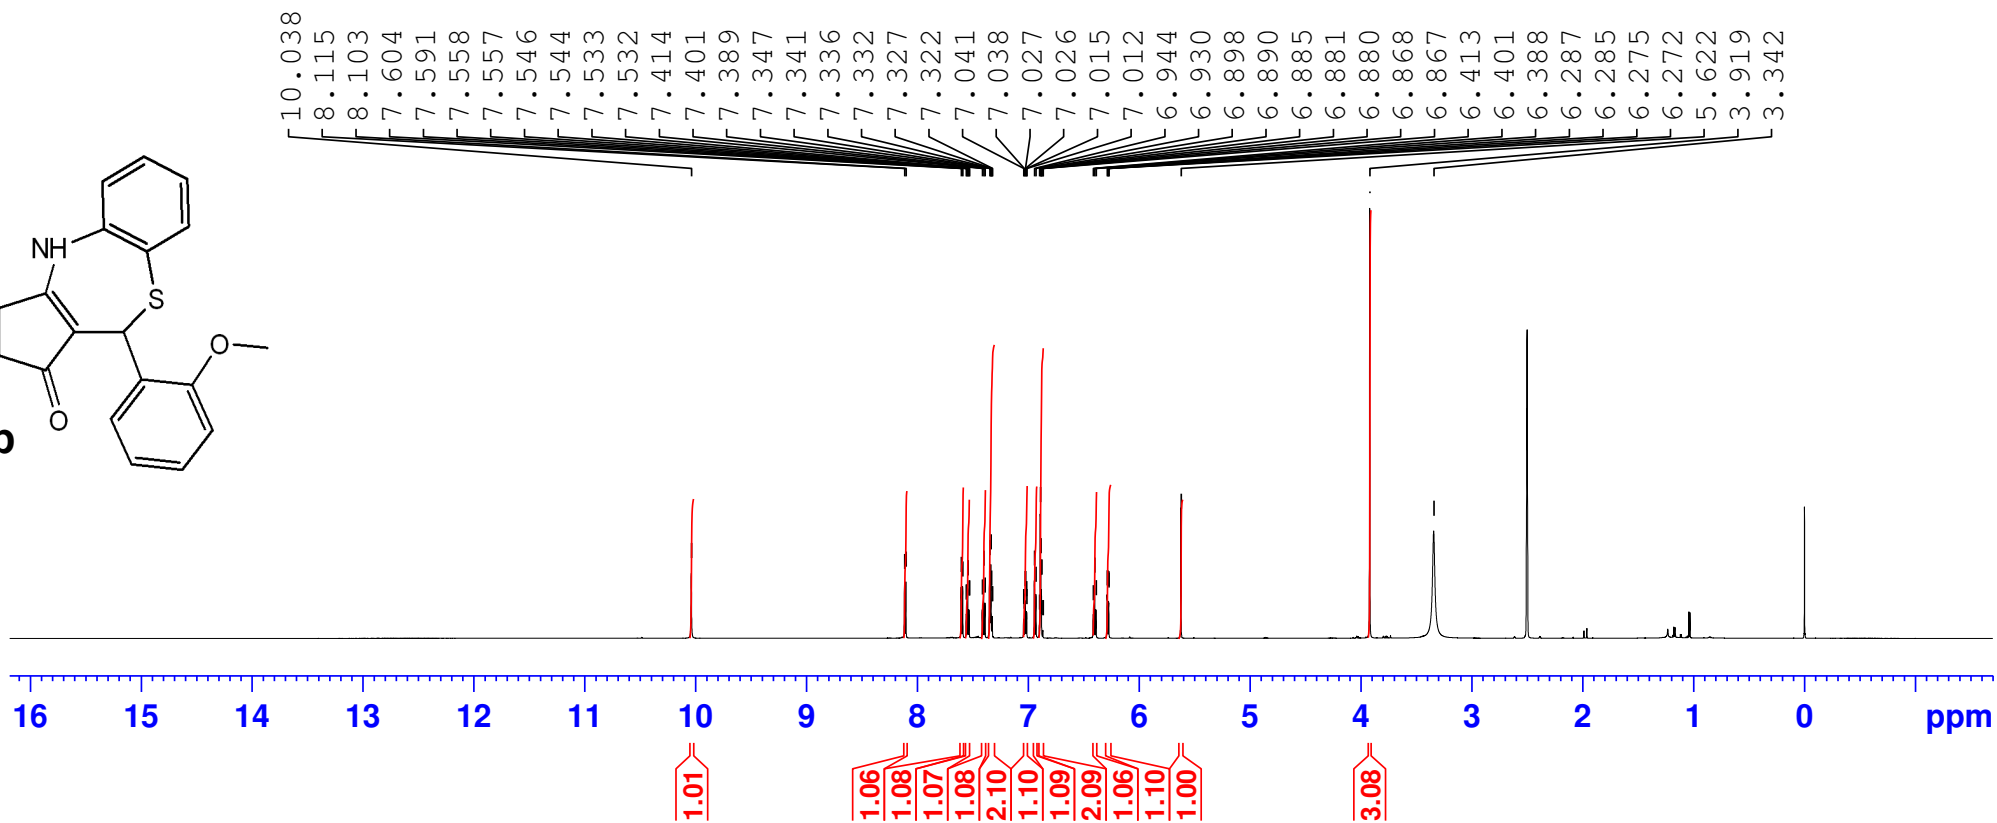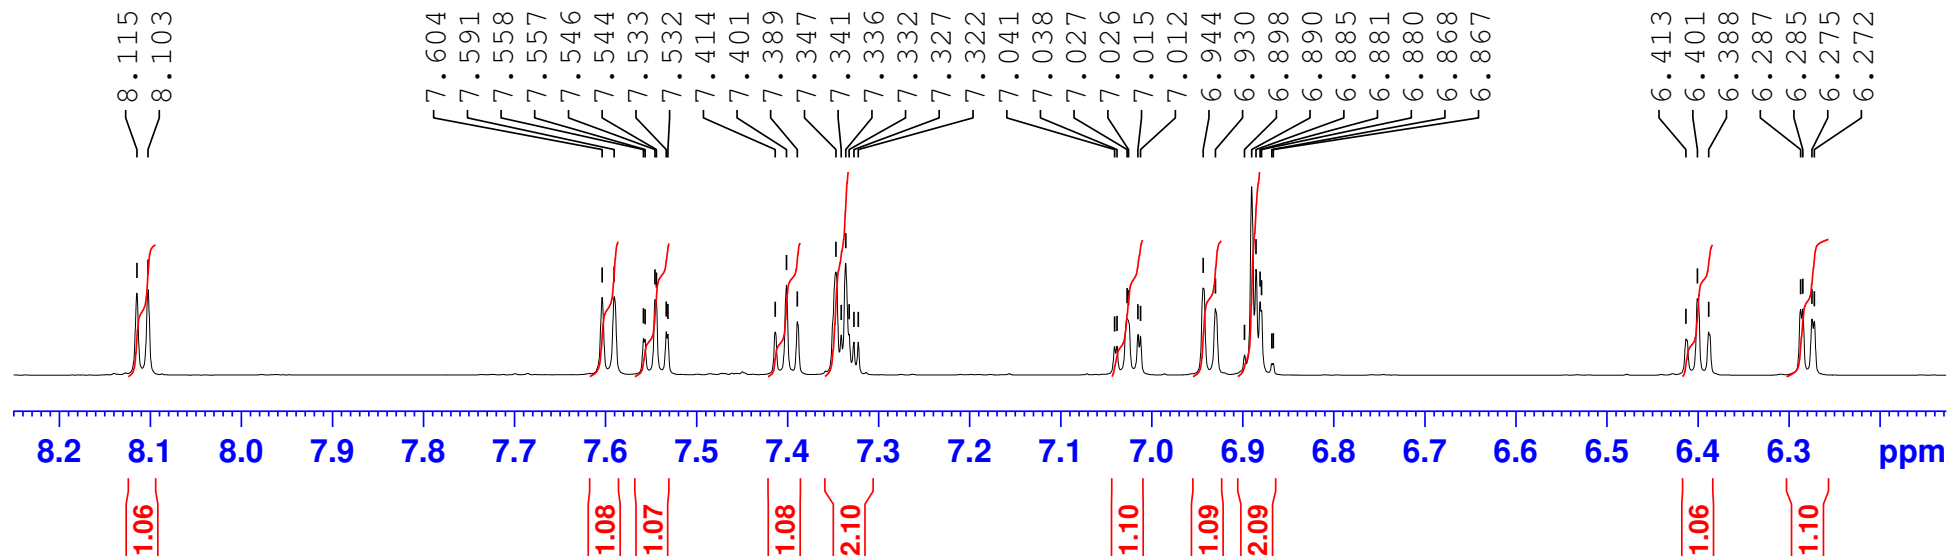

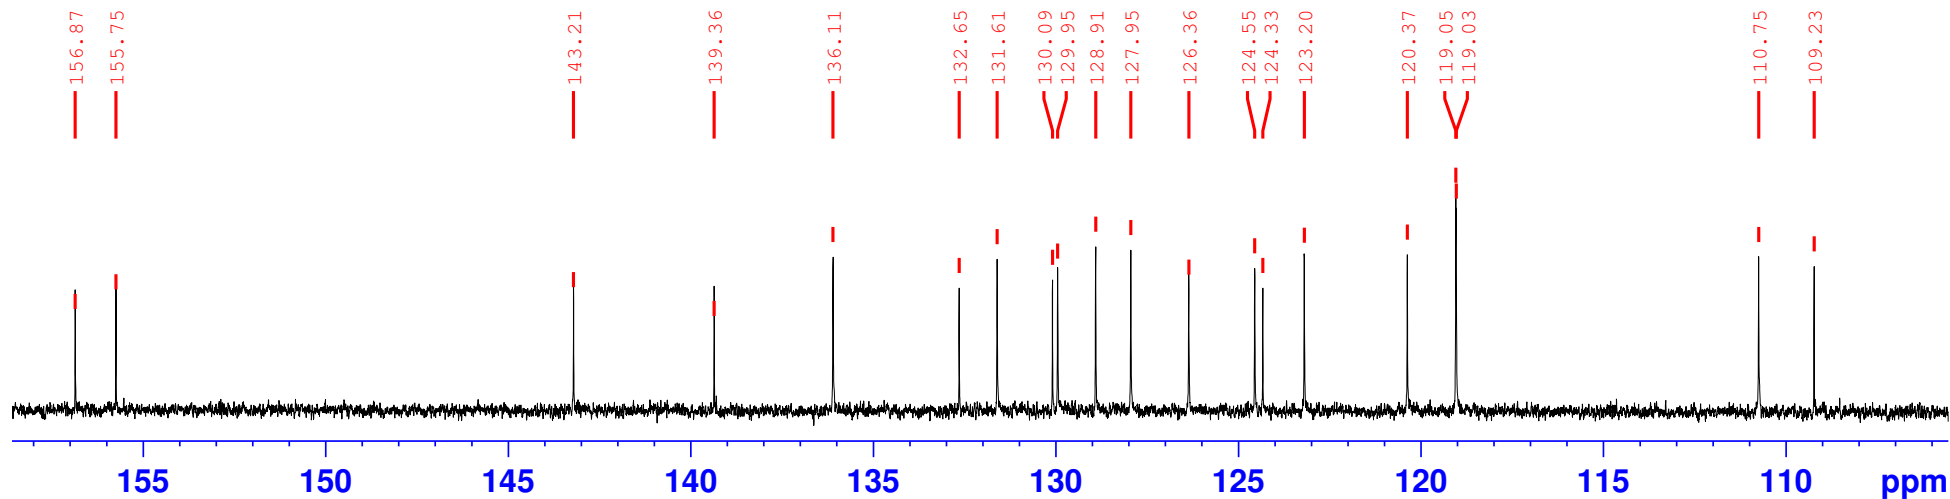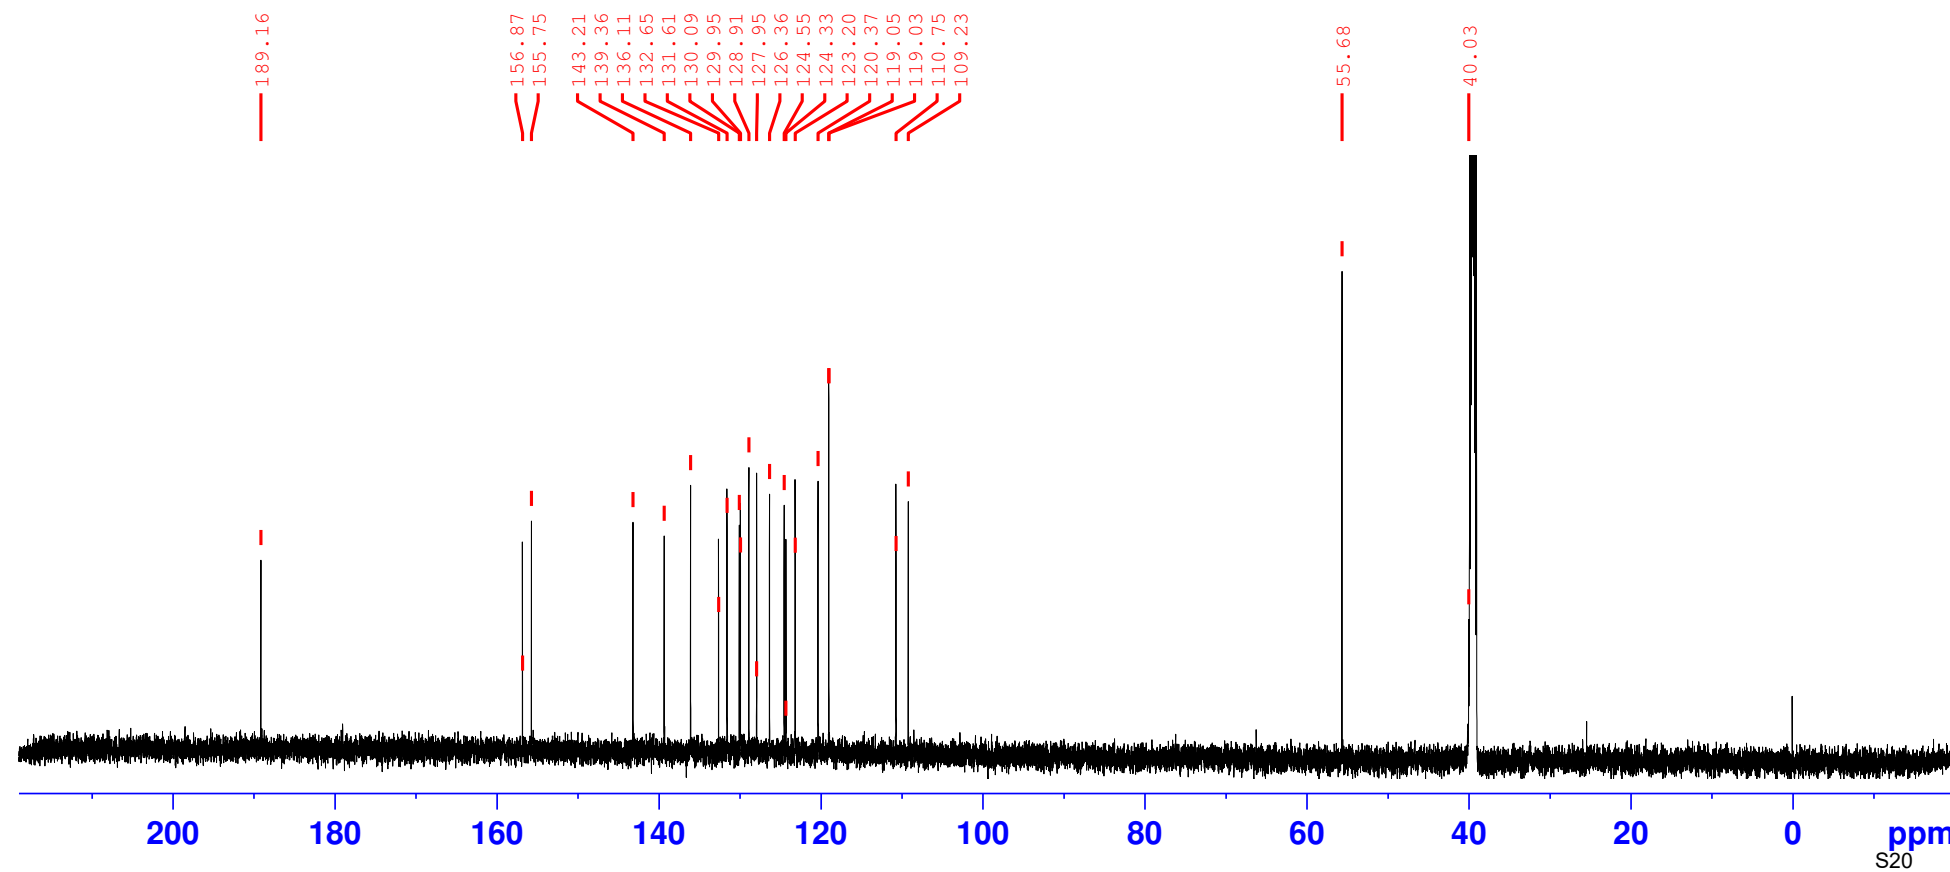

LJC-1-28 116 (1.949) Cm (2:120)

Scan ES+  
6.67e6

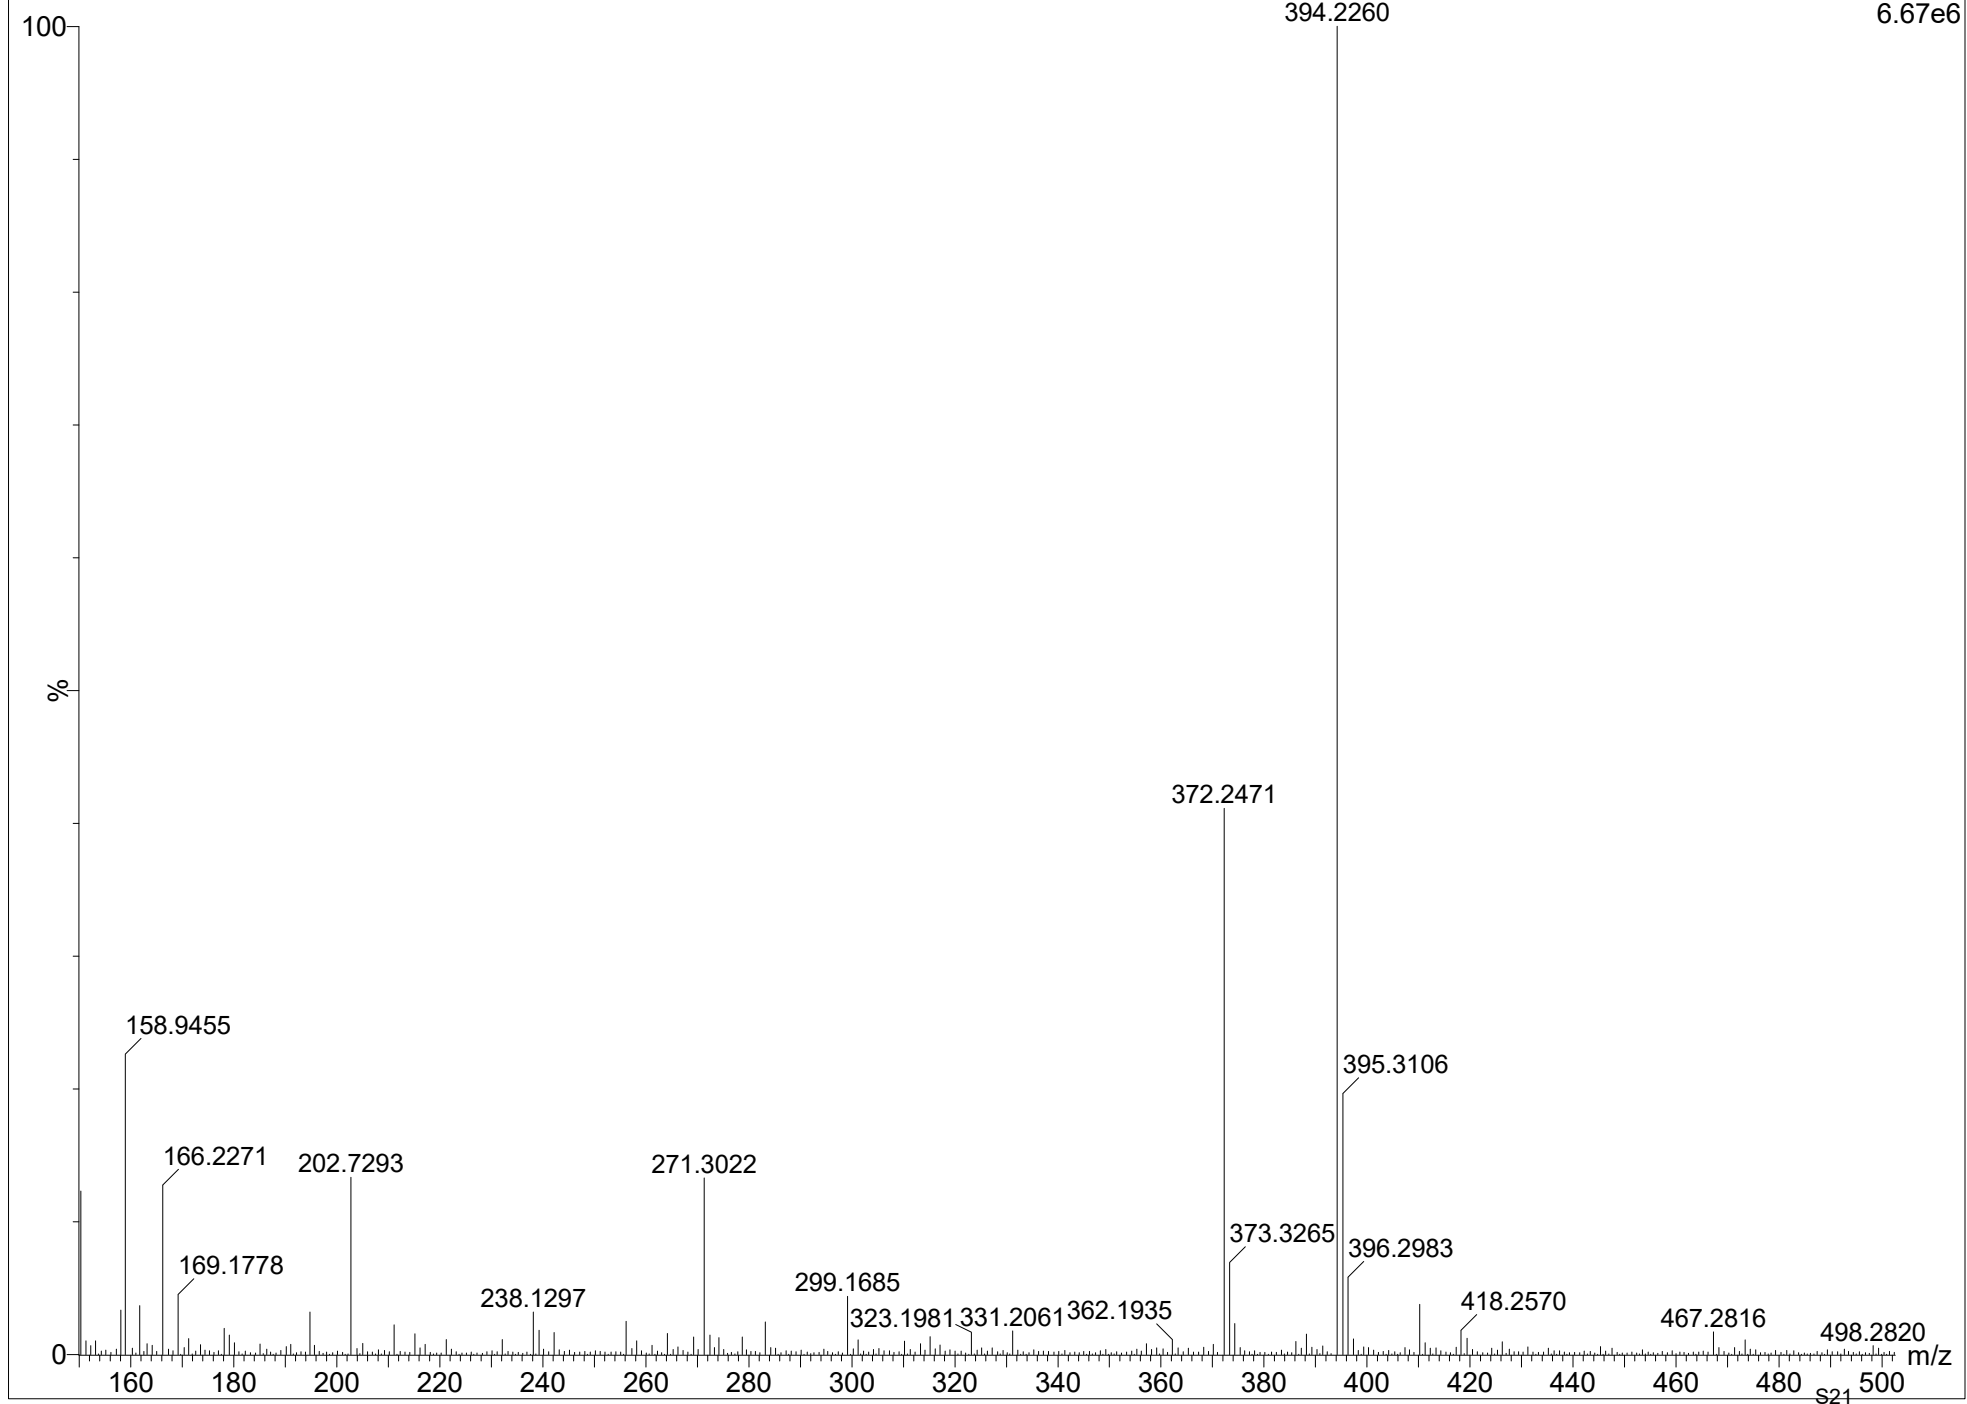

Sample Name: LJC 1-28

```

=====
Acq. Operator   : SYSTEM                      Seq. Line :   13
Sample Operator : SYSTEM
Acq. Instrument : 1260Infinity2              Location  : P1-B-05
Injection Date  : 2/20/2020 4:11:40 PM      Inj       :    1
                                           Inj Volume: 50.000 µl
Method          : C:\Users\Public\Documents\ChemStation\1\Data\Huihua-MC 2020-02-20 10-53-28
                  \MC-SMALL MOLE.M (Sequence Method)
Last changed    : 2/19/2020 11:54:04 AM by SYSTEM
Additional Info  : Peak(s) manually integrated

```

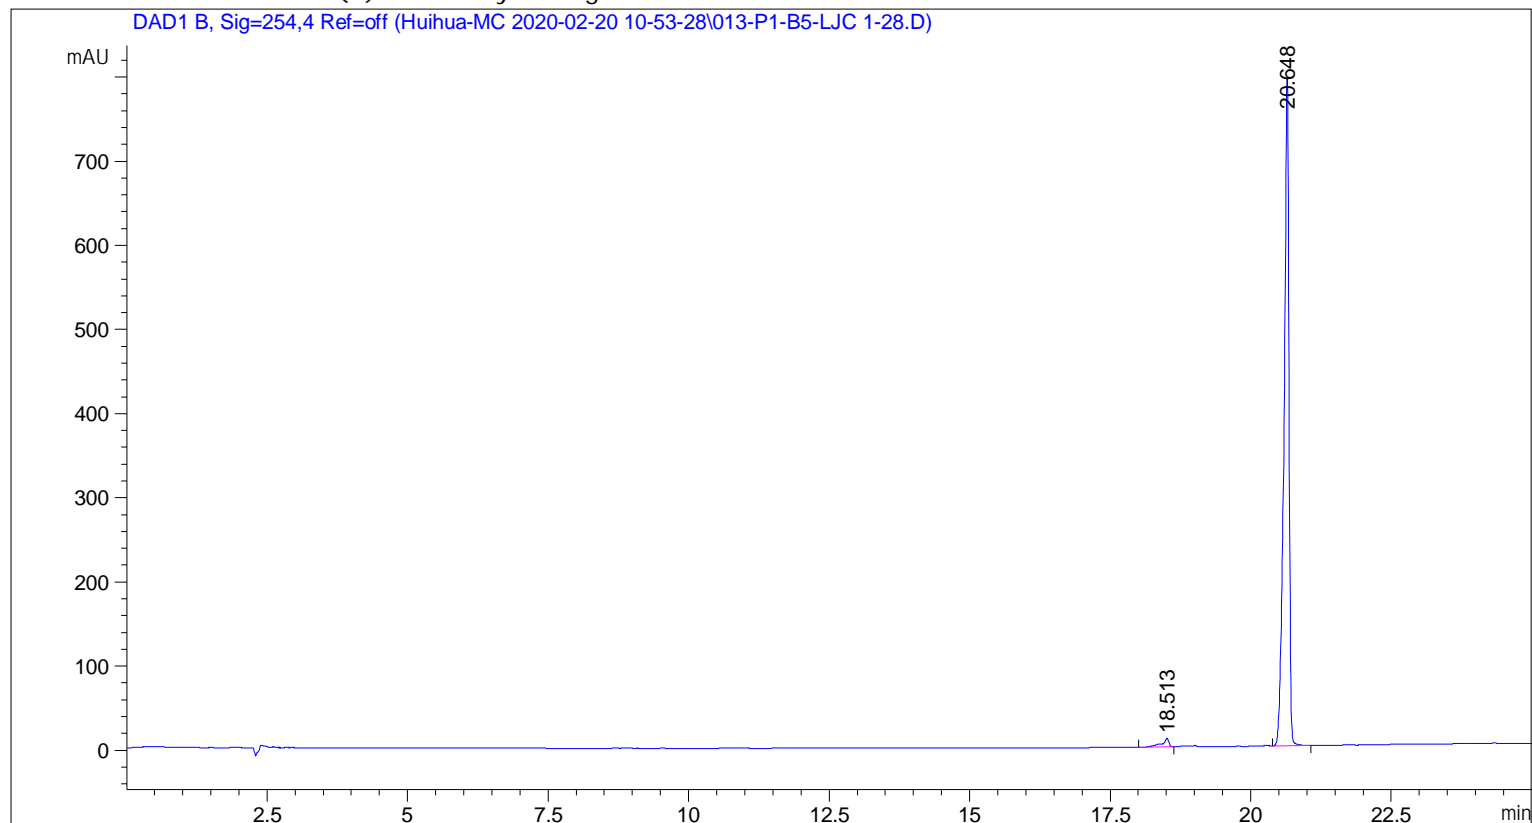

```

=====
                          Area Percent Report
=====

```

```

Sorted By      :      Signal
Multiplier     :      1.0000
Dilution       :      1.0000
Use Multiplier & Dilution Factor with ISTDs

```

Signal 1: DAD1 B, Sig=254,4 Ref=off

| Peak # | RetTime [min] | Type | Width [min] | Area [mAU*s] | Height [mAU] | Area %  |
|--------|---------------|------|-------------|--------------|--------------|---------|
| 1      | 18.513        | BB   | 0.1180      | 84.43469     | 9.84892      | 1.7142  |
| 2      | 20.648        | VB   | 0.0893      | 4841.26465   | 792.19861    | 98.2858 |

```
Totals :                4925.69934  802.04752
```

```

=====
*** End of Report ***

```

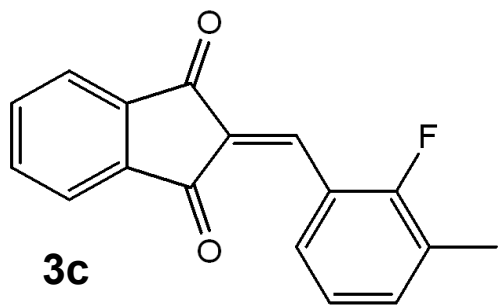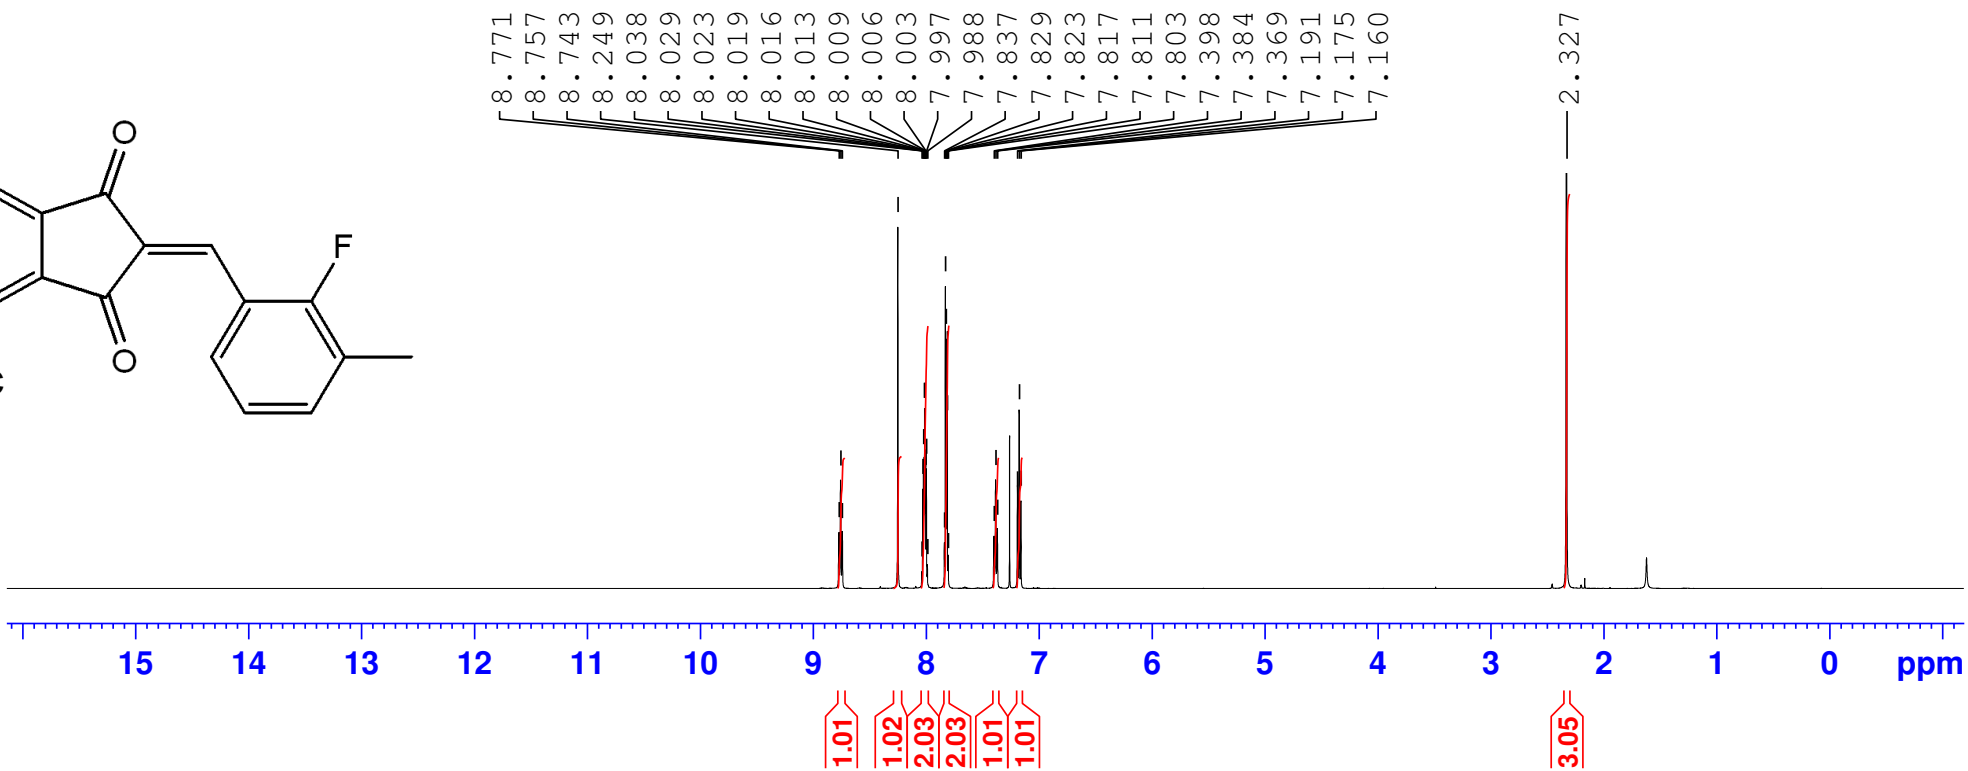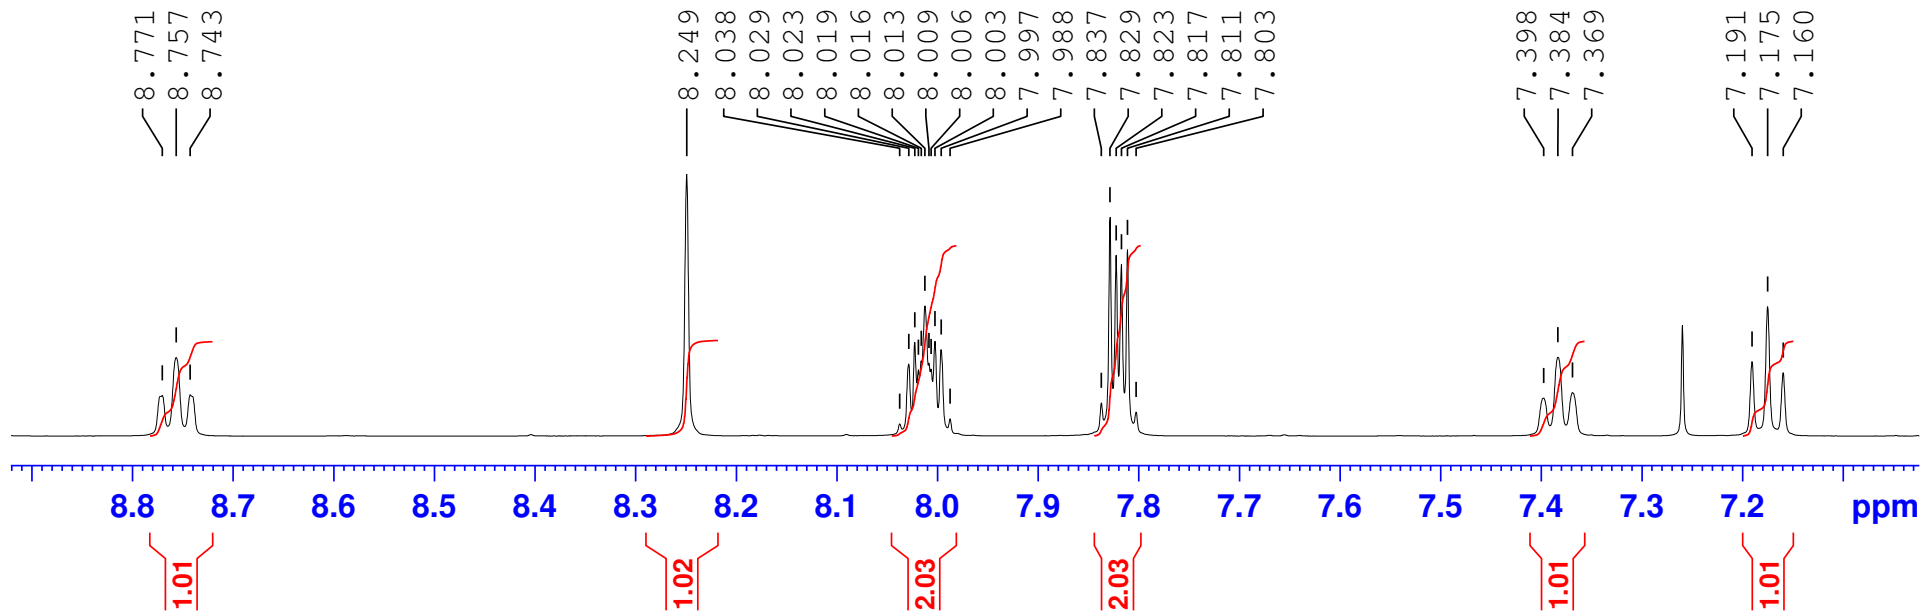

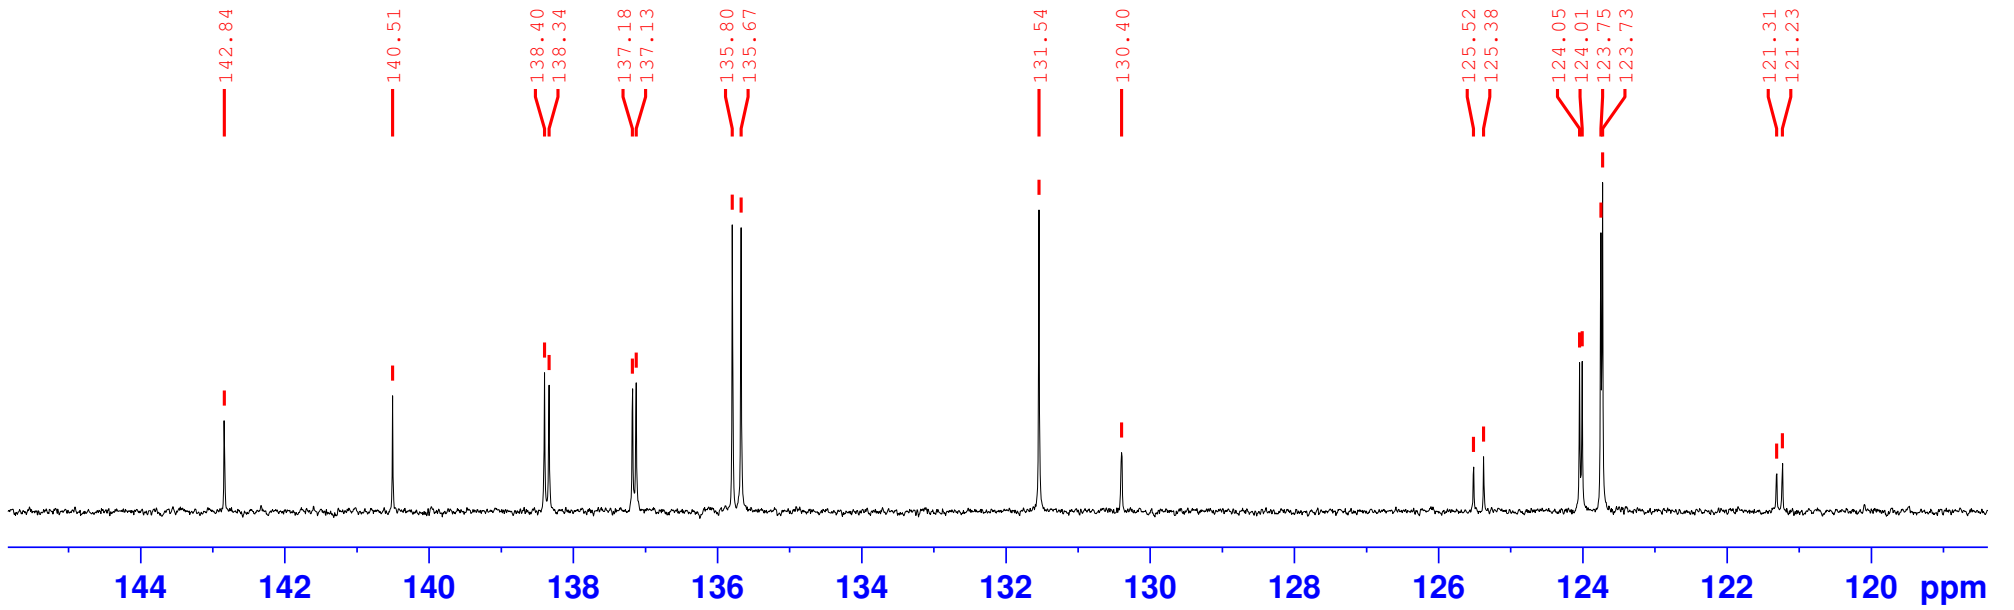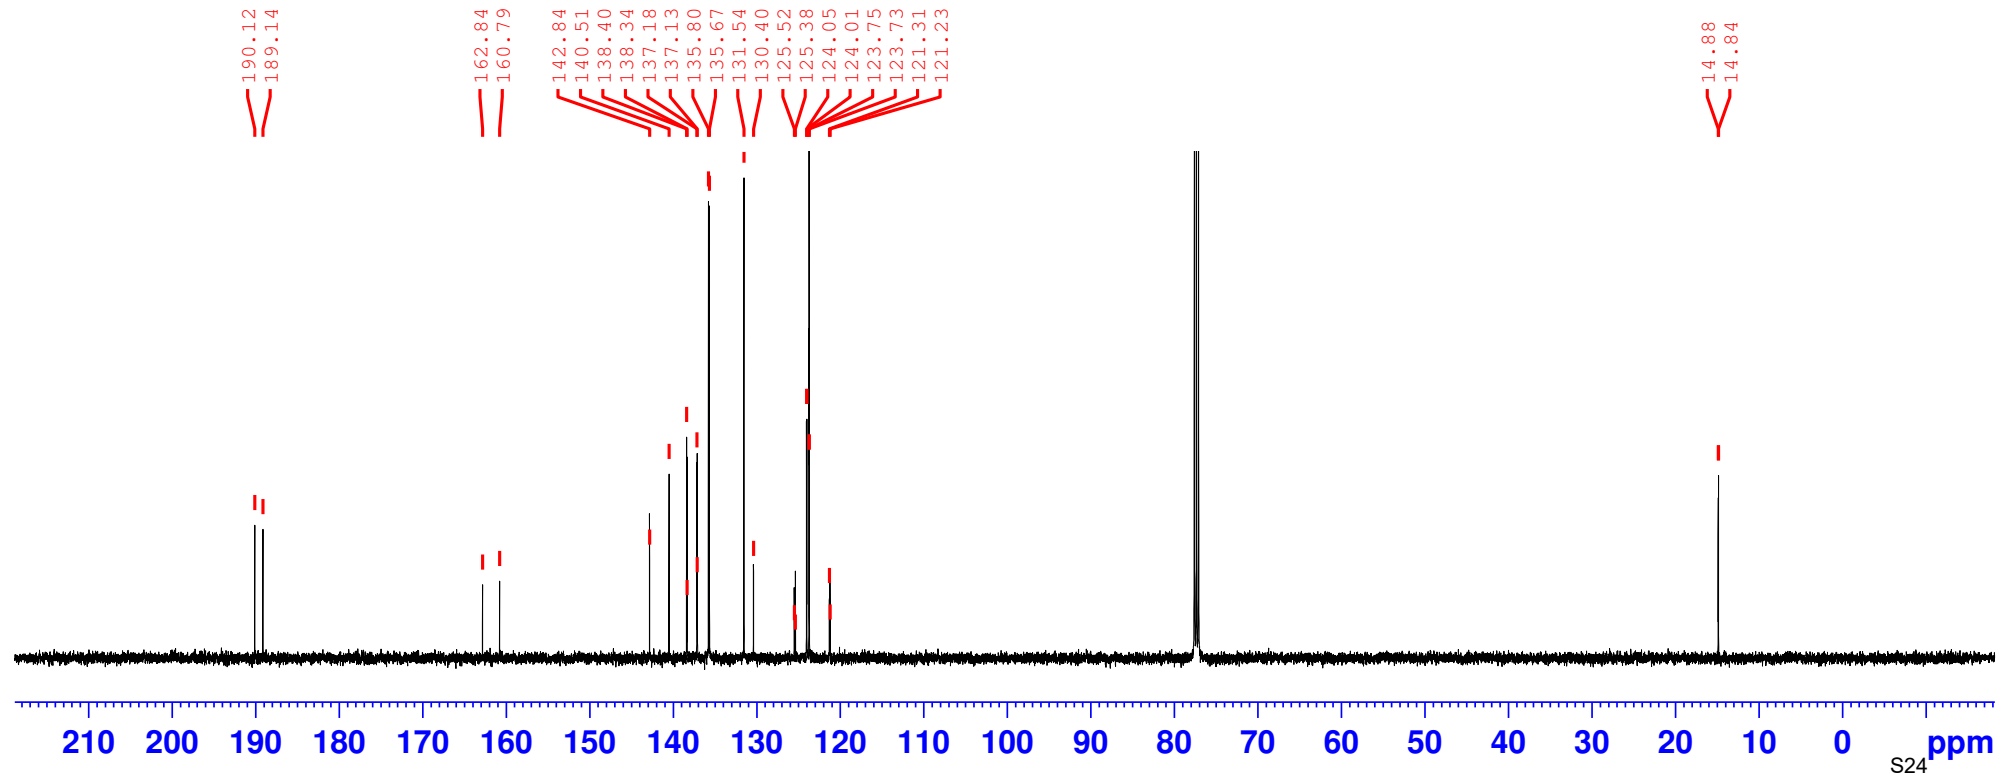



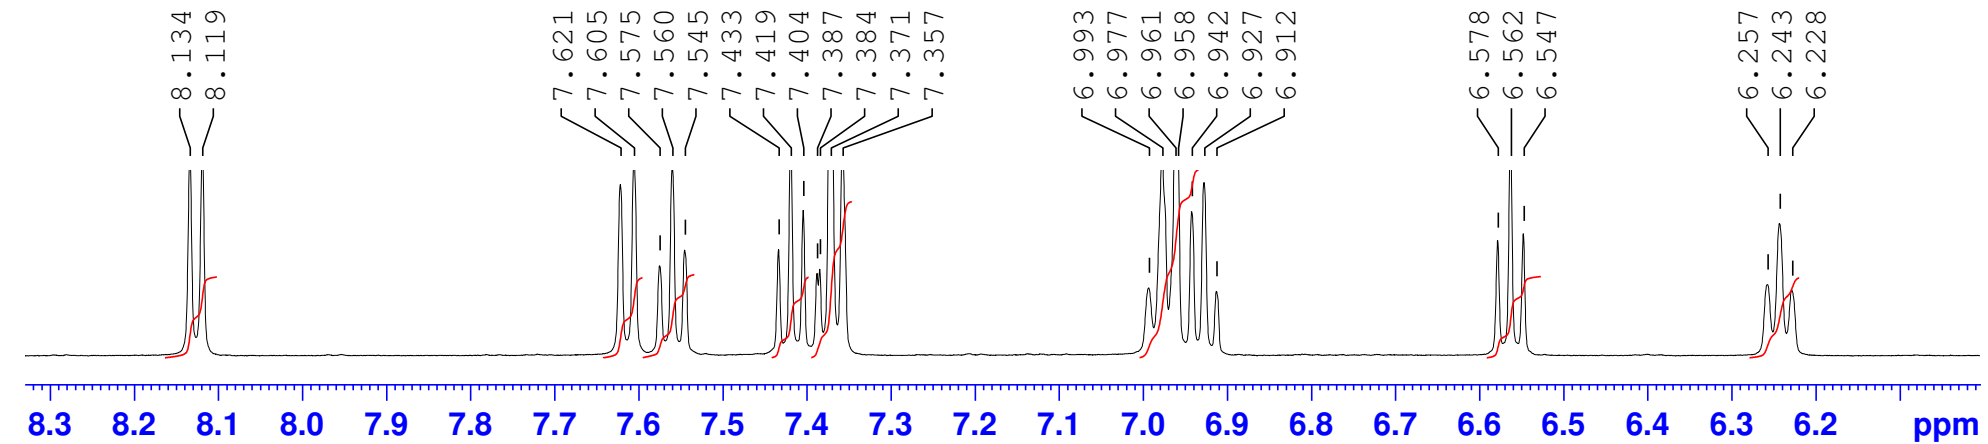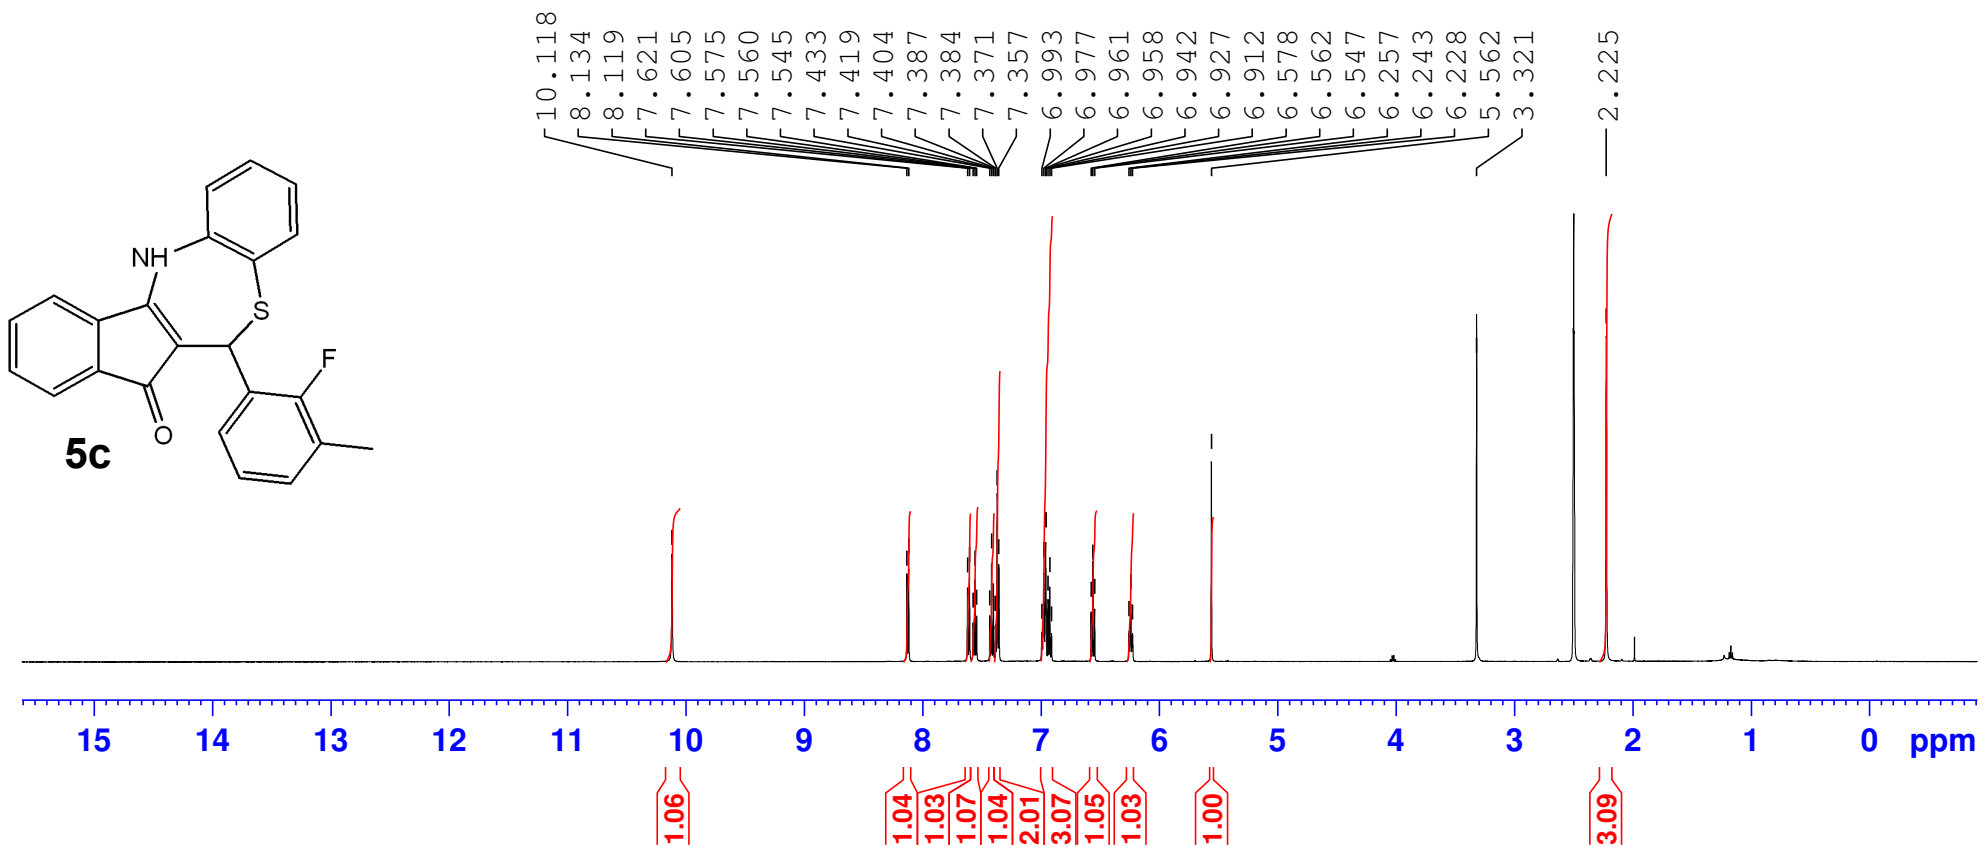

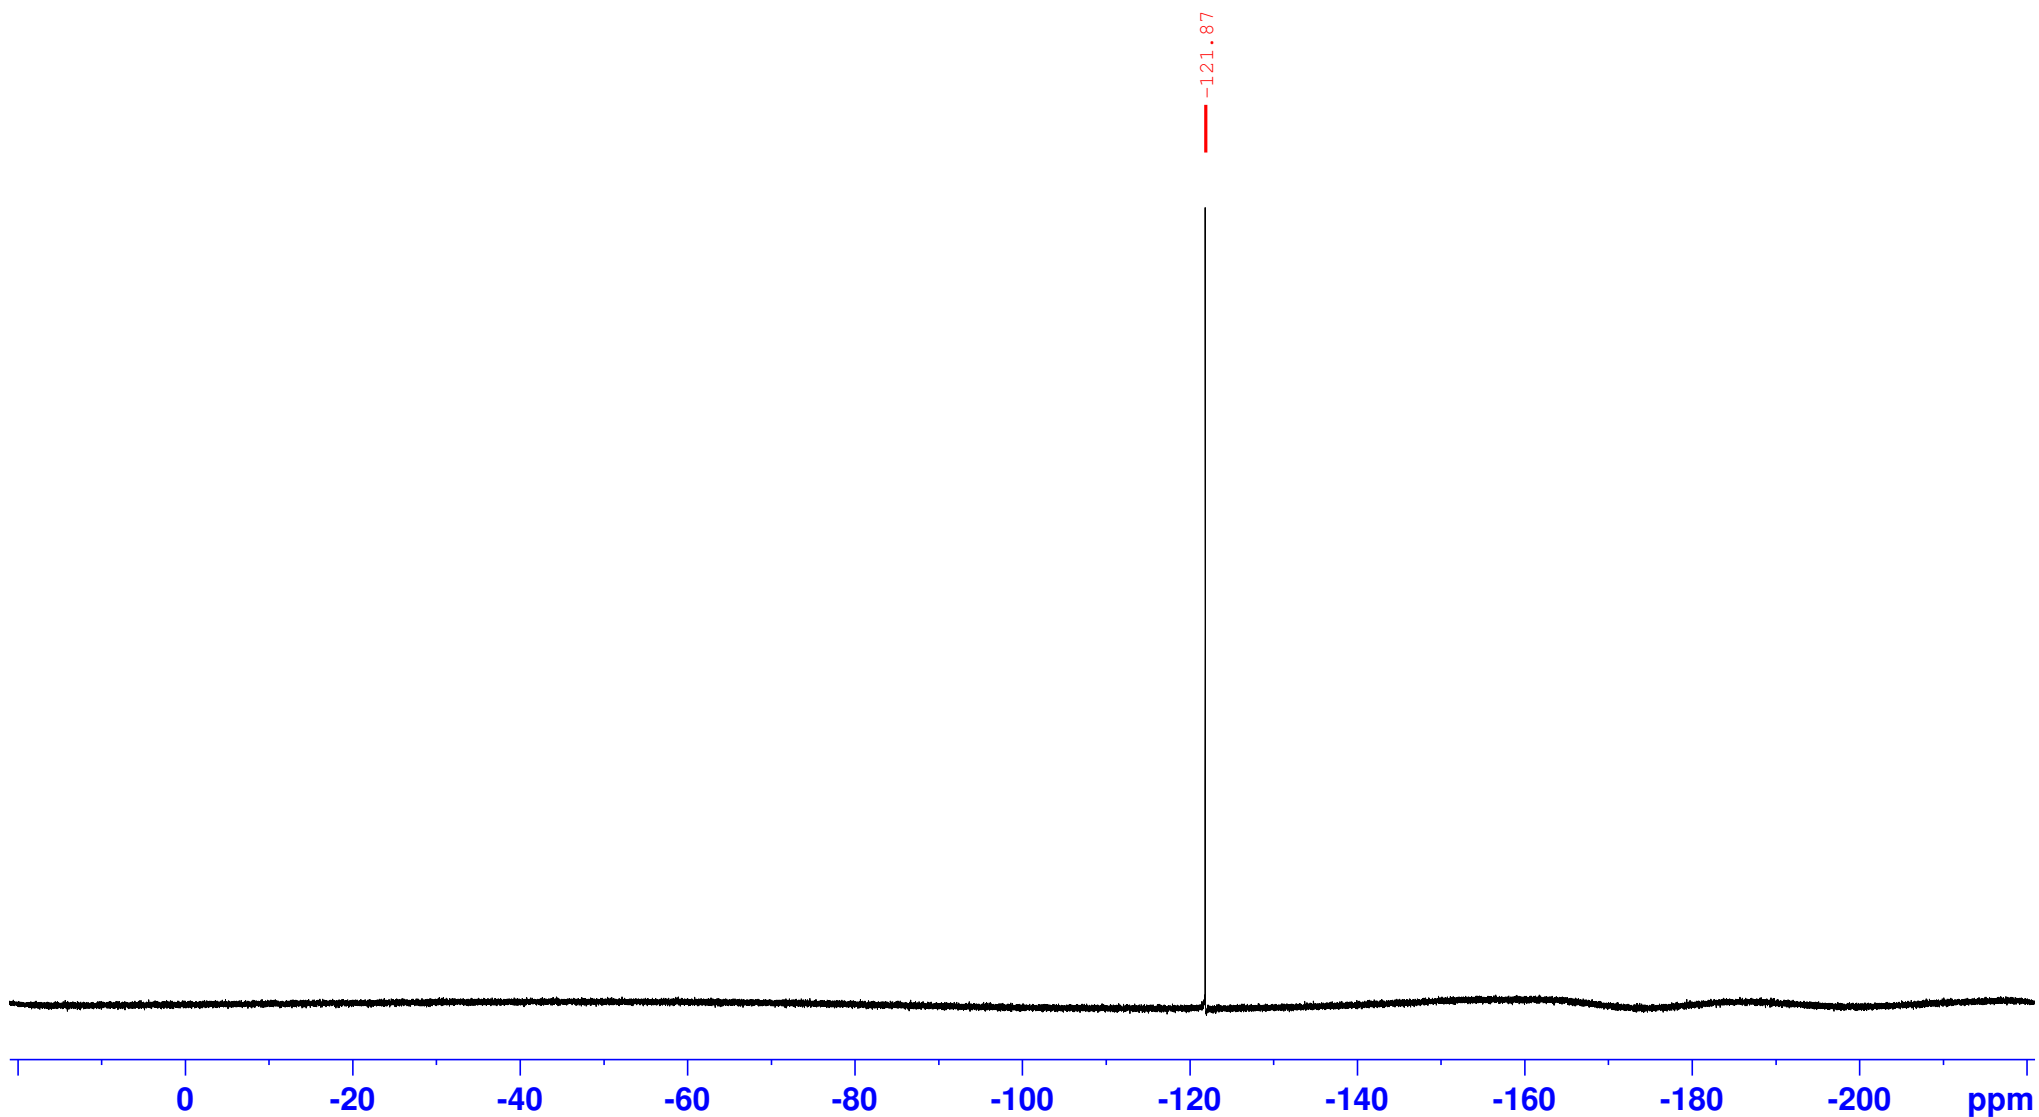

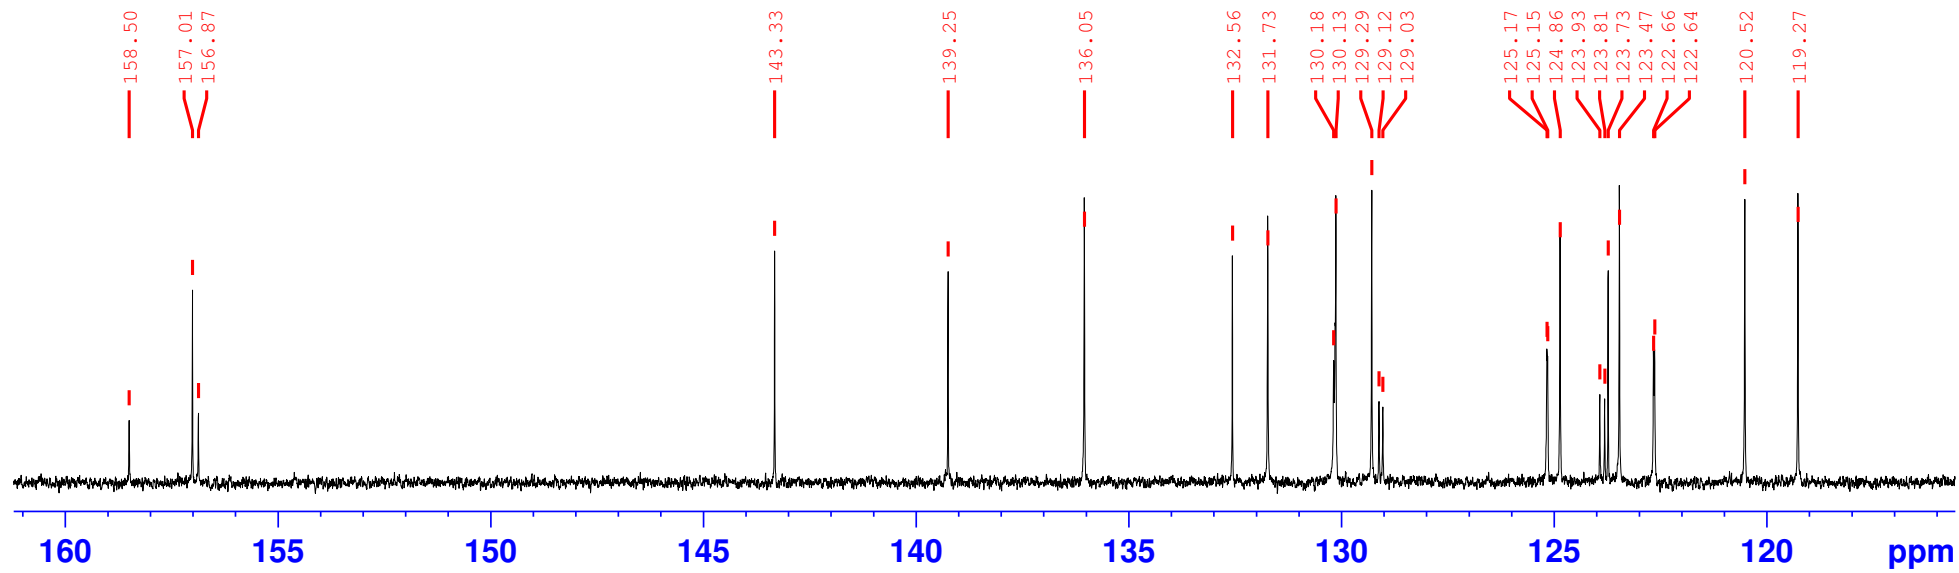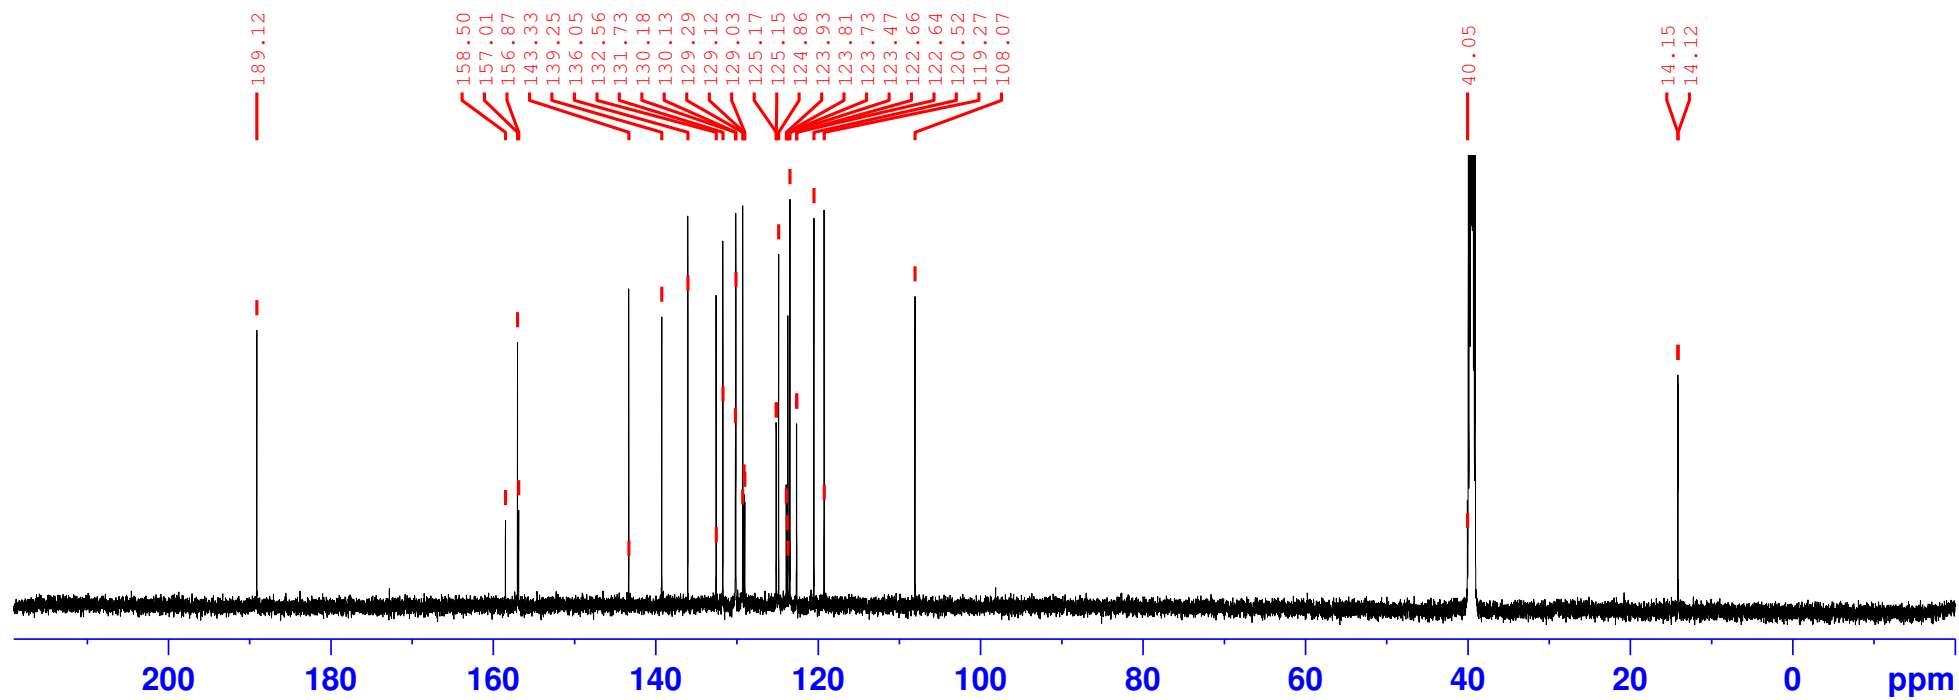

# User Spectrum Plot Report

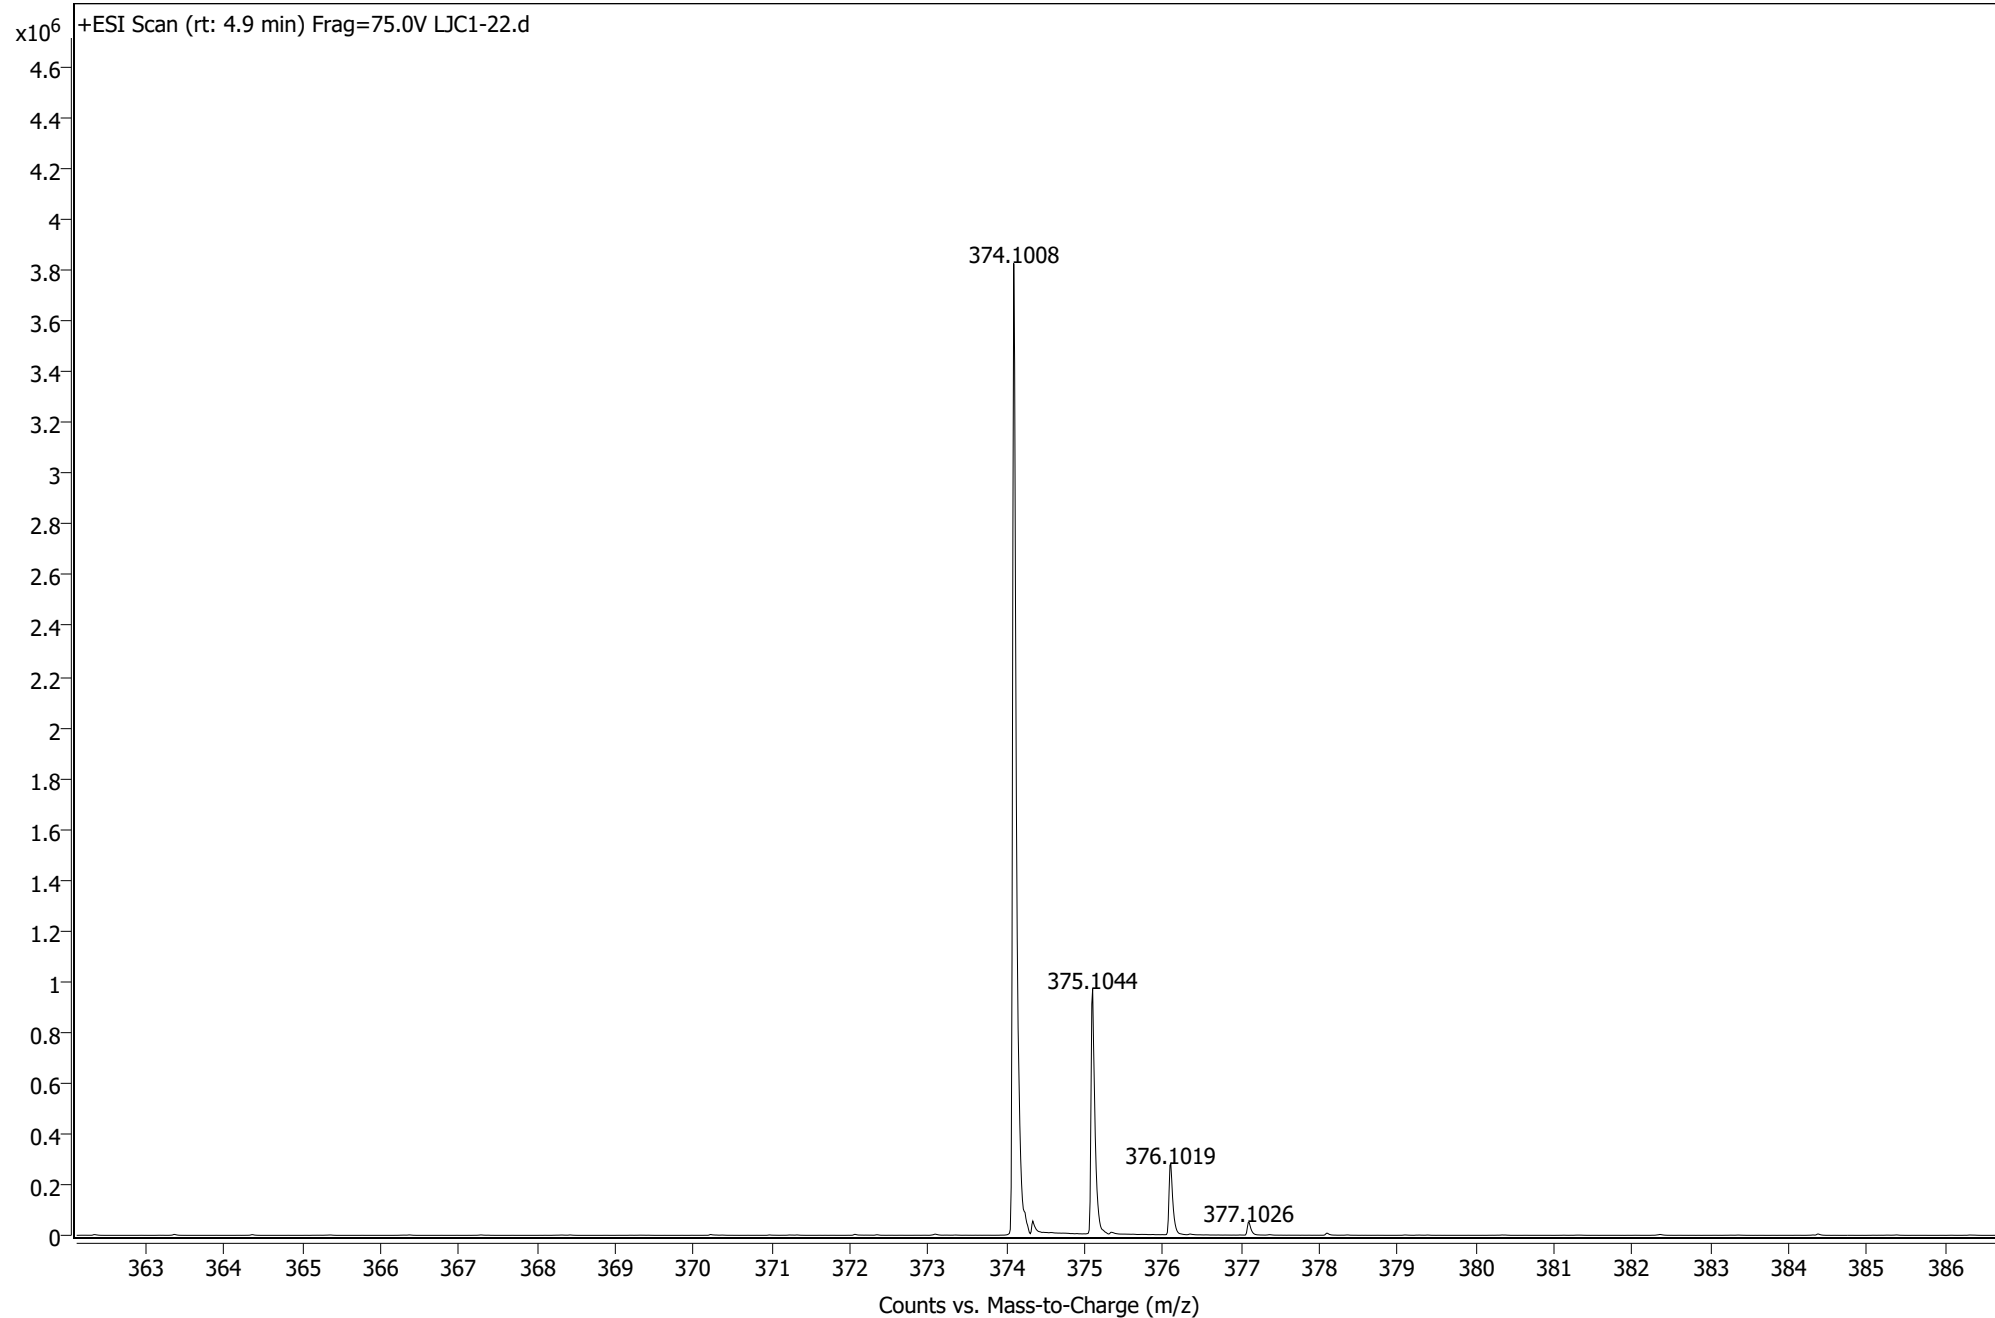

```

=====
Acq. Operator   : SYSTEM                      Seq. Line :    3
Sample Operator : SYSTEM
Acq. Instrument : 1260Infini ty2             Locati on :   P1-C-01
Injection Date  : 3/23/2020 2:58:08 PM       Inj       :    1
                                           Inj Volume: 50.000 µl

Method         : C:\Users\Public\Documents\ChemStation\1\Data\Huihua-MC 2020-03-23 14-13-54
                \MC-SMALL MOLE.M (Sequence Method)
Last changed   : 2/19/2020 11:54:04 AM by SYSTEM
  
```

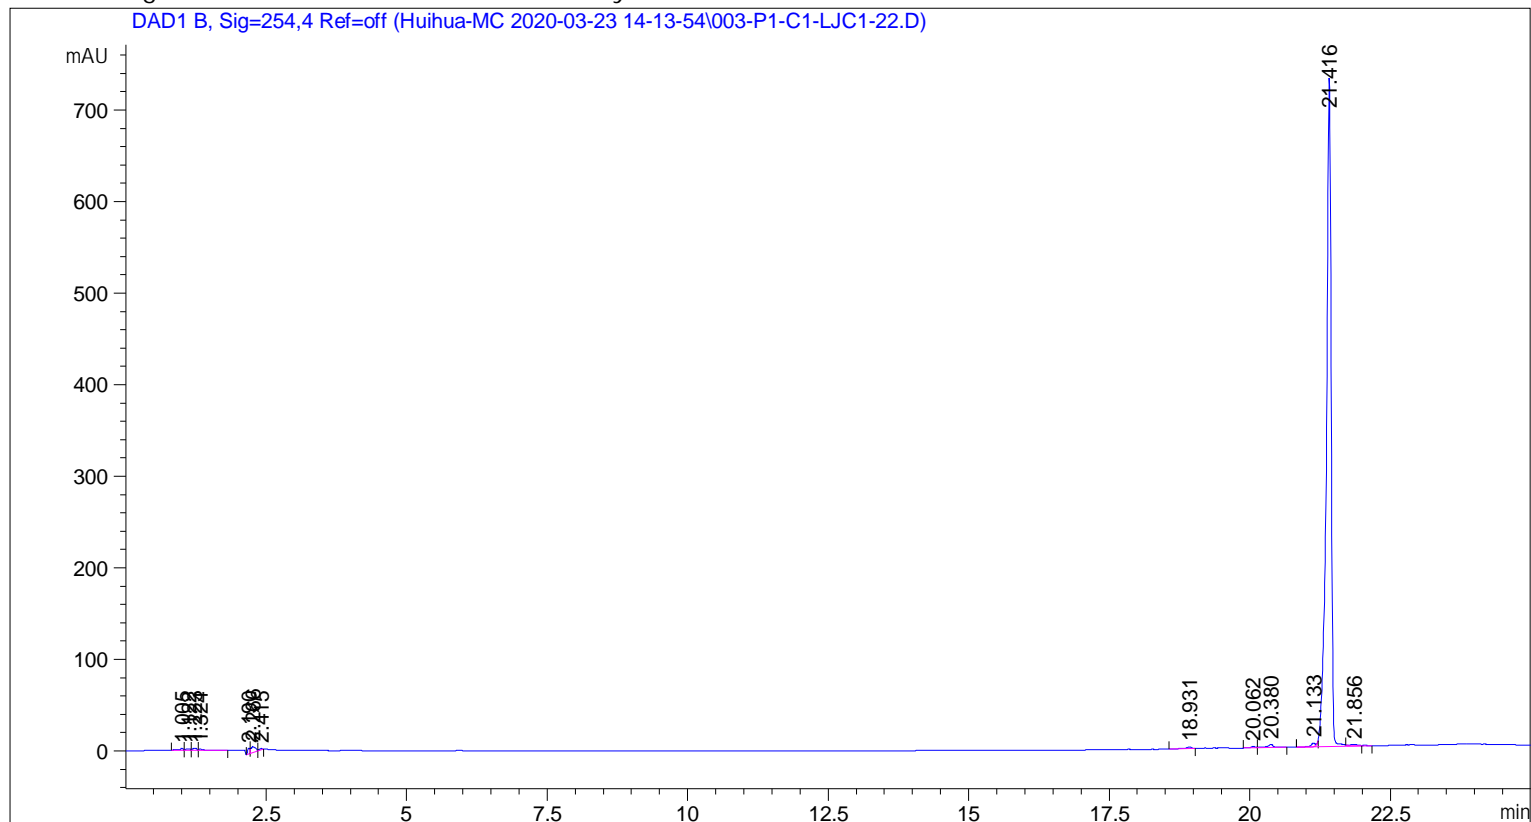

=====  
 Area Percent Report  
 =====

Sorted By : Signal  
 Multiplier : 1.0000  
 Dilution : 1.0000  
 Use Multiplier & Dilution Factor with ISTDs

Signal 1: DAD1 B, Sig=254,4 Ref=off

| Peak # | RetTime [min] | Type | Width [min] | Area [mAU*s] | Height [mAU] | Area % |
|--------|---------------|------|-------------|--------------|--------------|--------|
| 1      | 1.005         | BV   | 0.0513      | 7.06923      | 2.09814      | 0.1569 |
| 2      | 1.122         | VV   | 0.0779      | 7.80227      | 1.42504      | 0.1732 |
| 3      | 1.223         | VV   | 0.0699      | 10.57917     | 2.05994      | 0.2348 |
| 4      | 1.324         | VB   | 0.0864      | 6.30973      | 1.04606      | 0.1401 |
| 5      | 2.190         | BV   | 0.0360      | 14.94652     | 6.22738      | 0.3318 |
| 6      | 2.266         | VV   | 0.0818      | 38.18400     | 6.37926      | 0.8476 |
| 7      | 2.415         | VB   | 0.0634      | 6.31446      | 1.49156      | 0.1402 |
| 8      | 18.931        | BB   | 0.1081      | 16.73990     | 2.16868      | 0.3716 |
| 9      | 20.062        | BV   | 0.0902      | 8.46999      | 1.33149      | 0.1880 |

| Peak # | RetTime [min] | Type | Width [min] | Area [mAU*s] | Height [mAU] | Area %  |
|--------|---------------|------|-------------|--------------|--------------|---------|
| 10     | 20.380        | VV R | 0.1213      | 31.83788     | 3.59509      | 0.7068  |
| 11     | 21.133        | BV E | 0.0870      | 23.94049     | 4.04545      | 0.5314  |
| 12     | 21.416        | VV R | 0.0869      | 4314.00391   | 730.46741    | 95.7640 |
| 13     | 21.856        | VV E | 0.1301      | 18.63017     | 1.84068      | 0.4136  |

Totals :                                   4504.82773   764.17618

=====  
\*\*\* End of Report \*\*\*

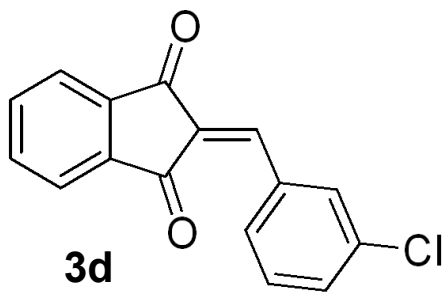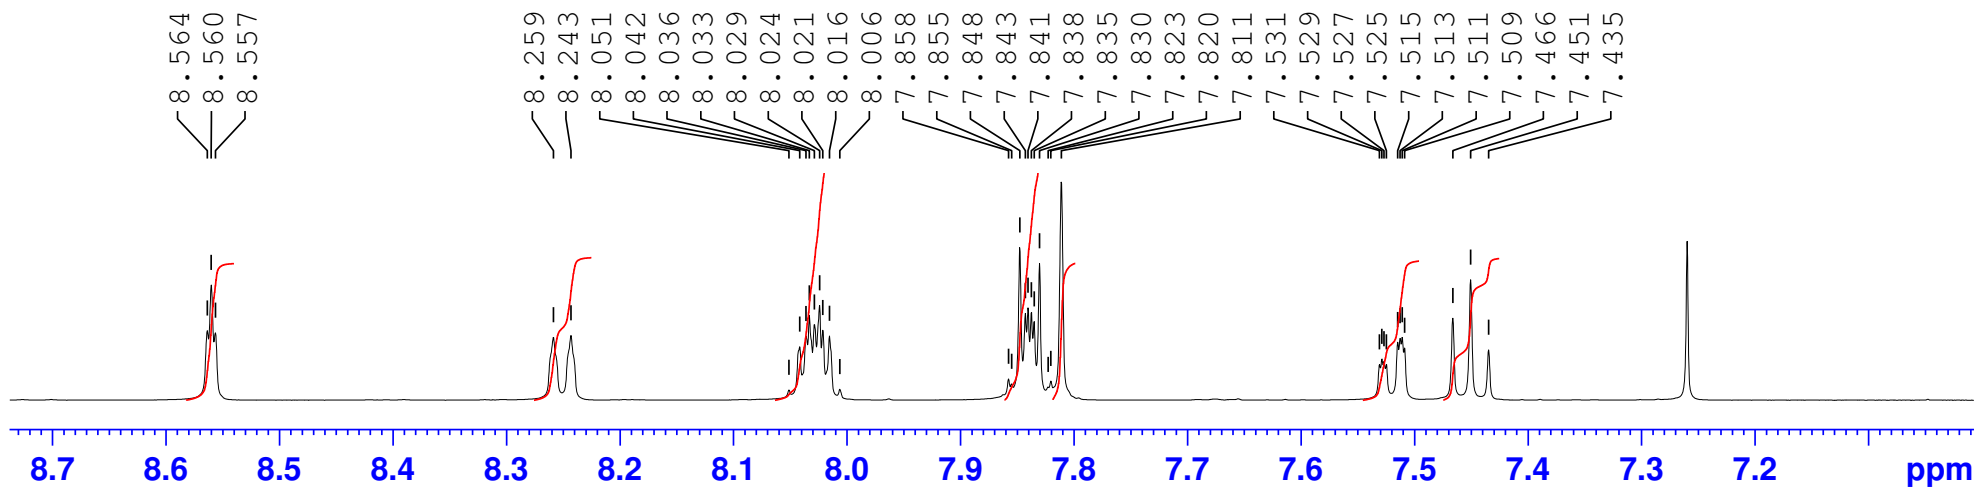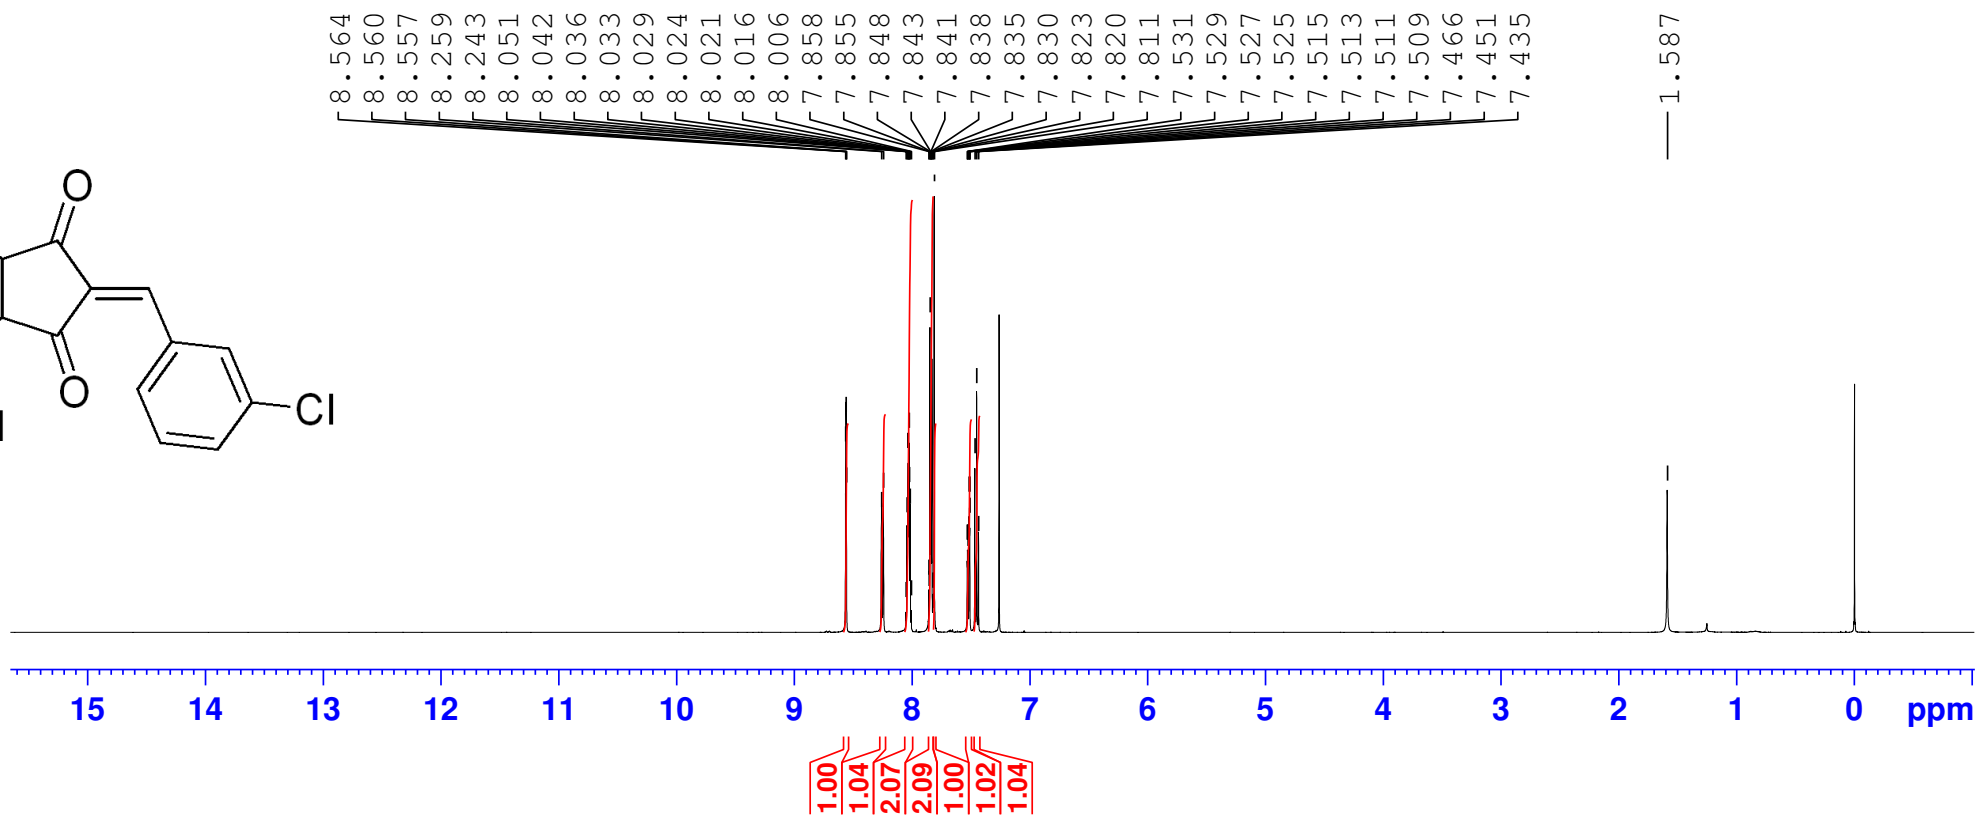

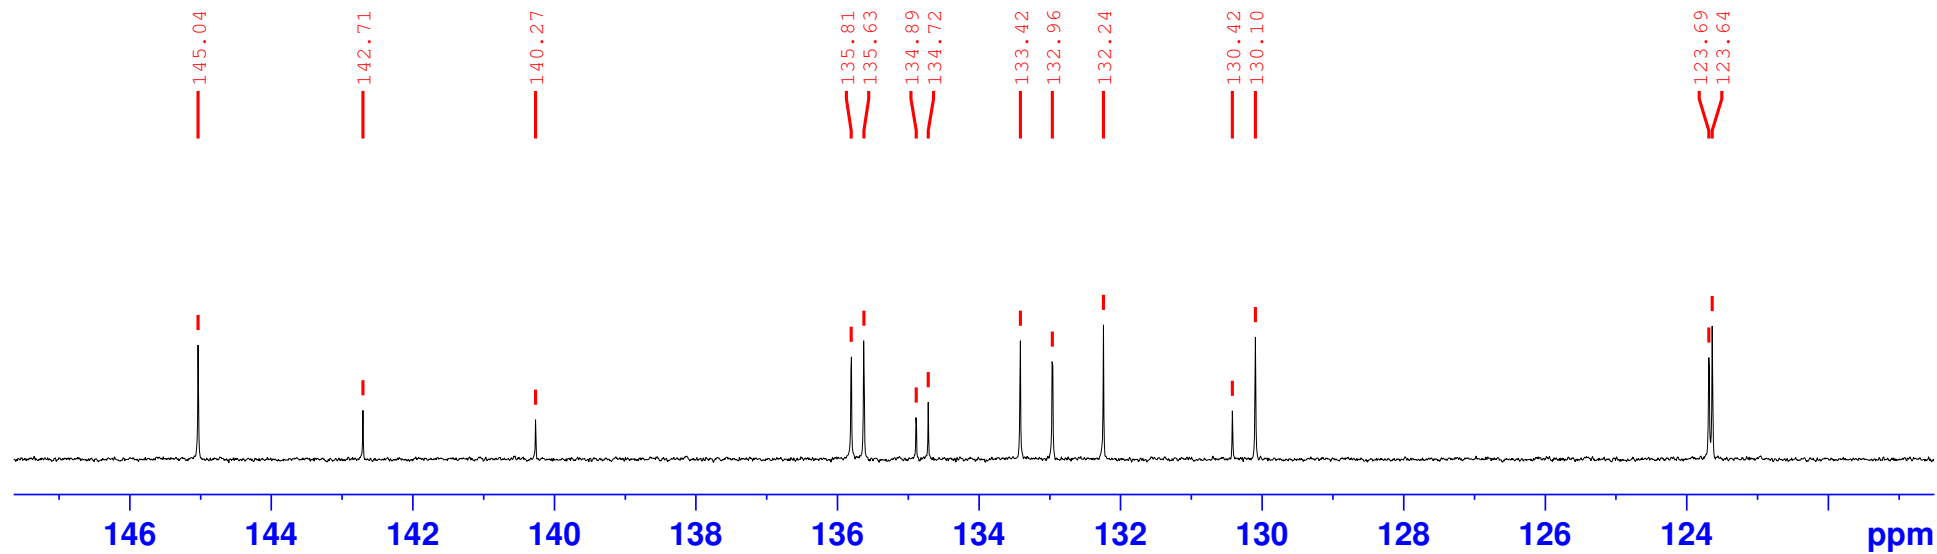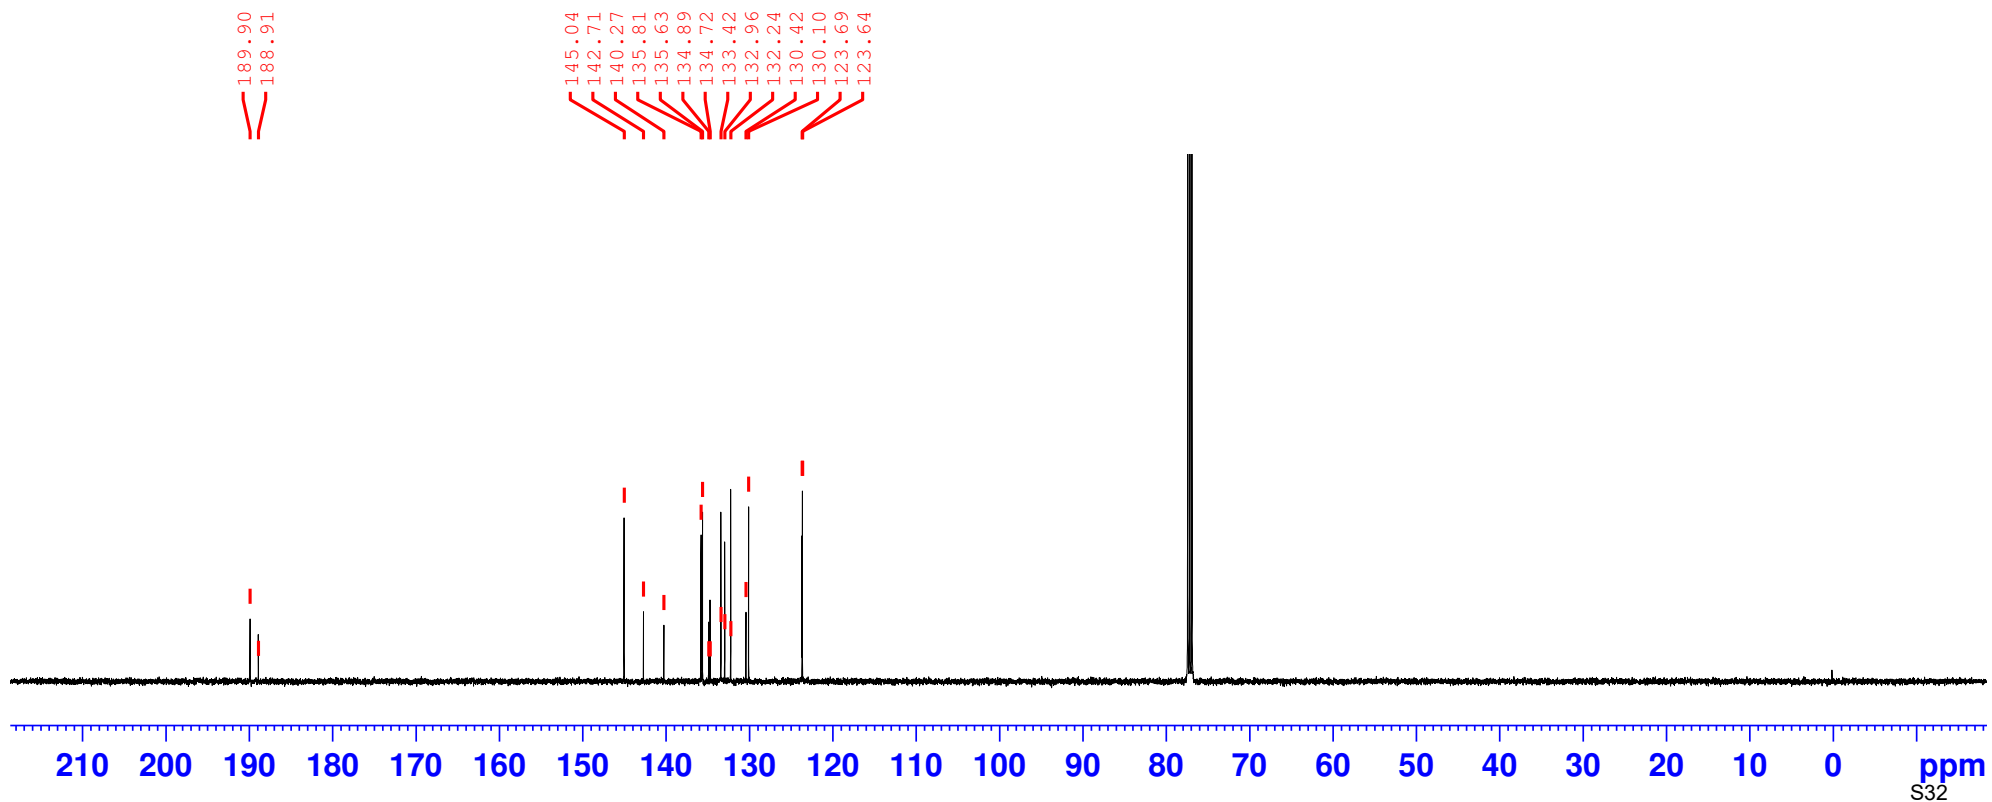



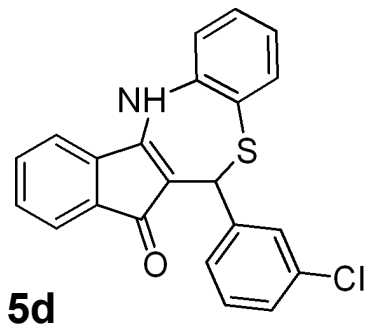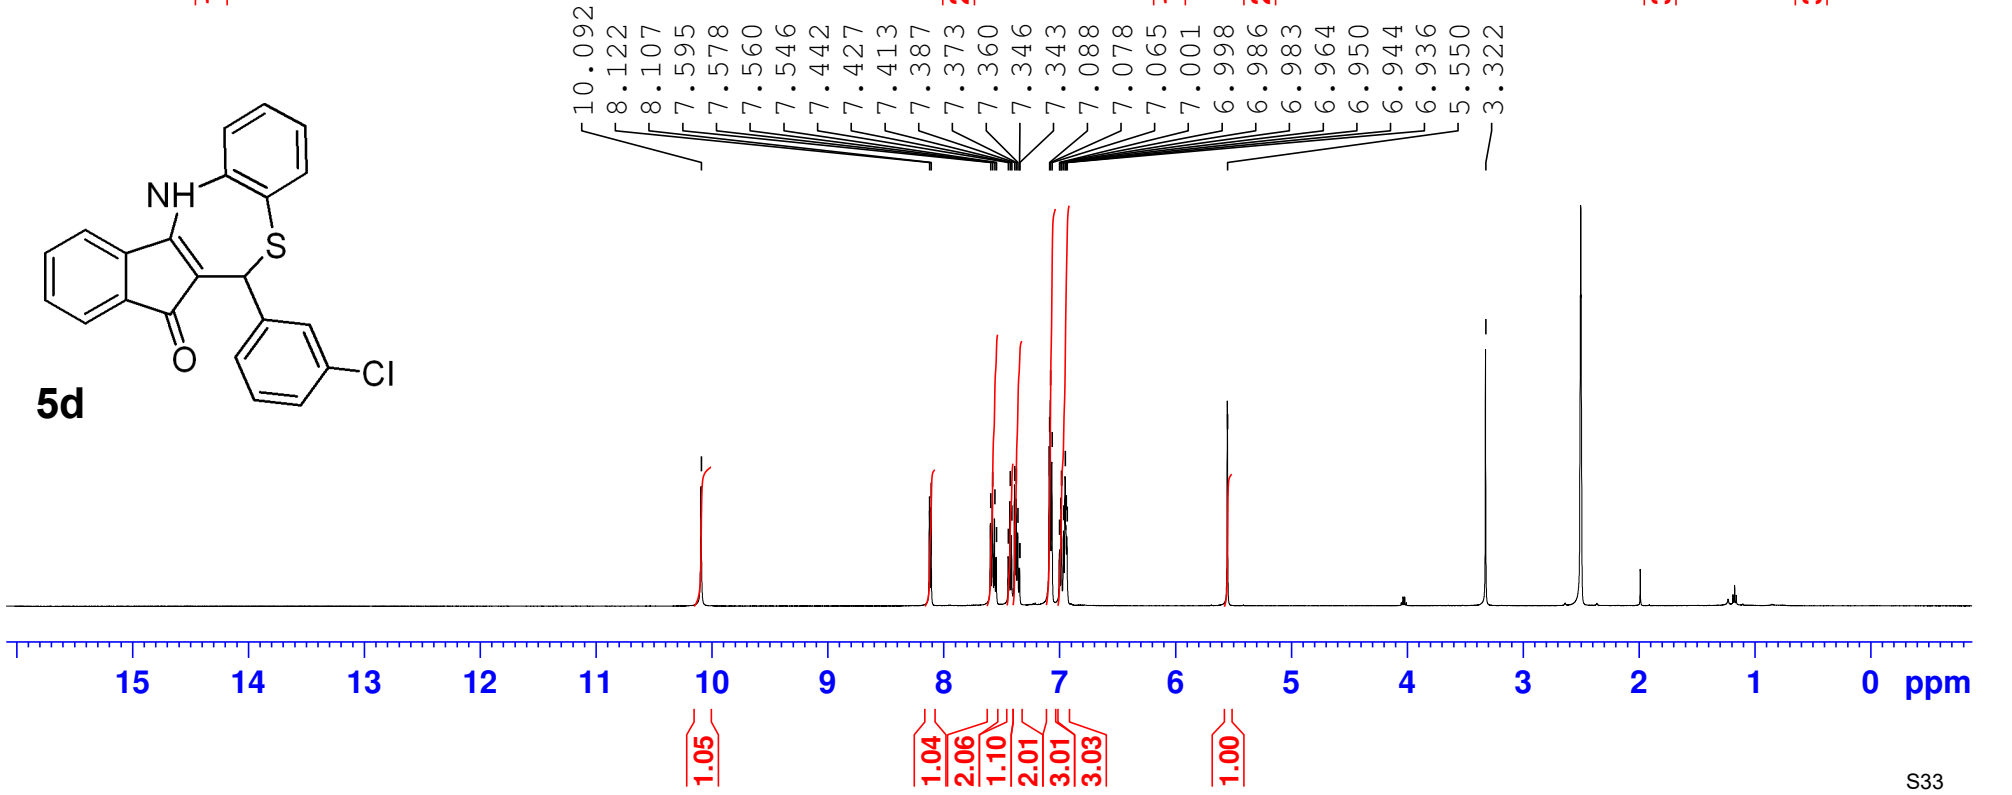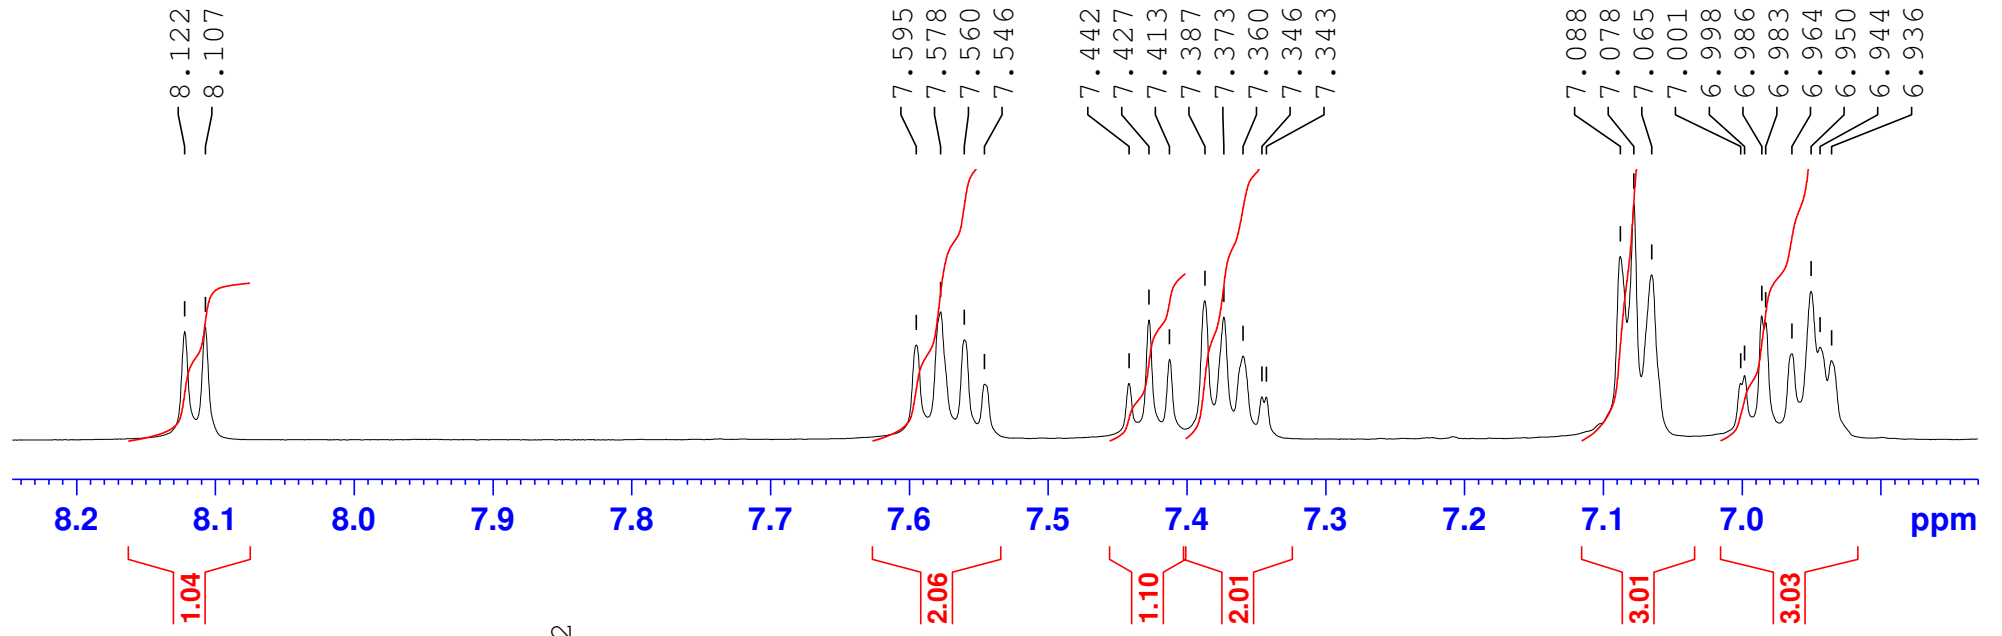

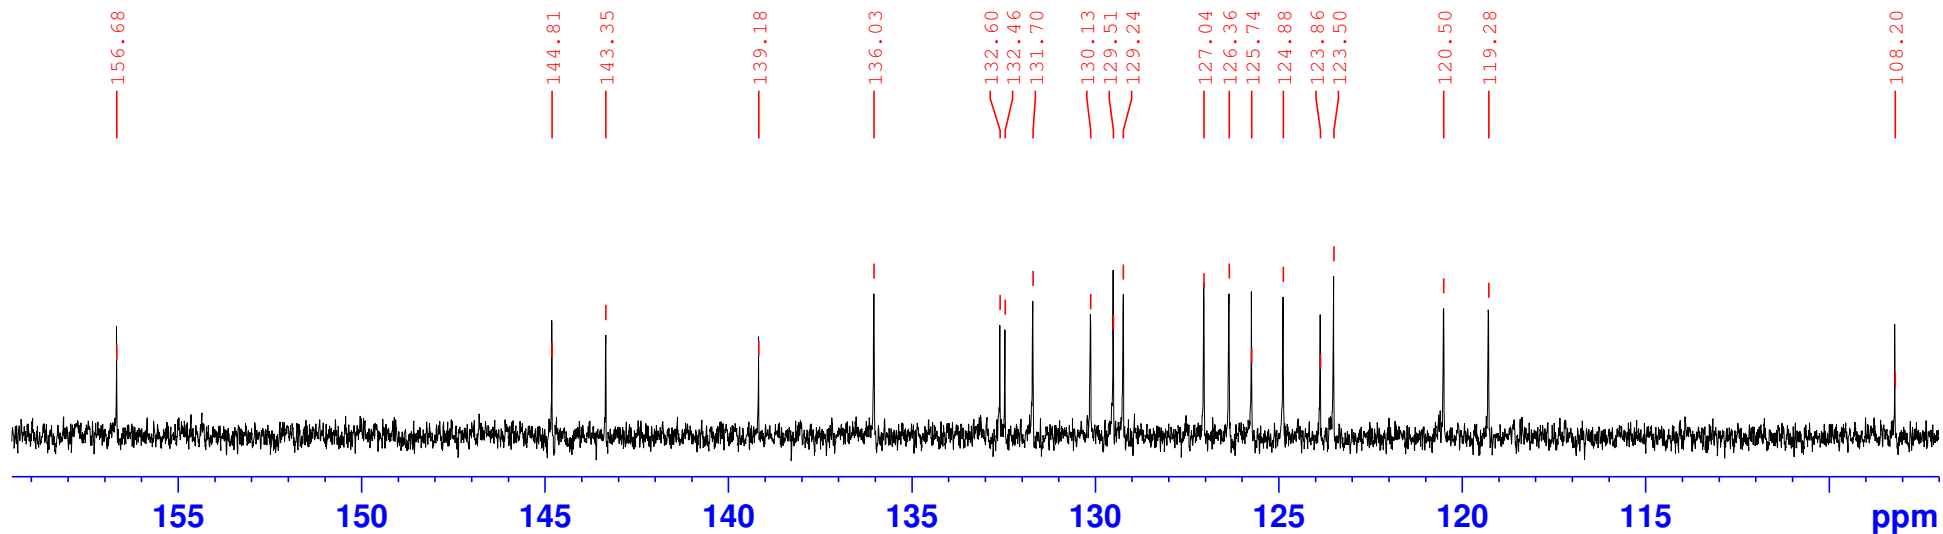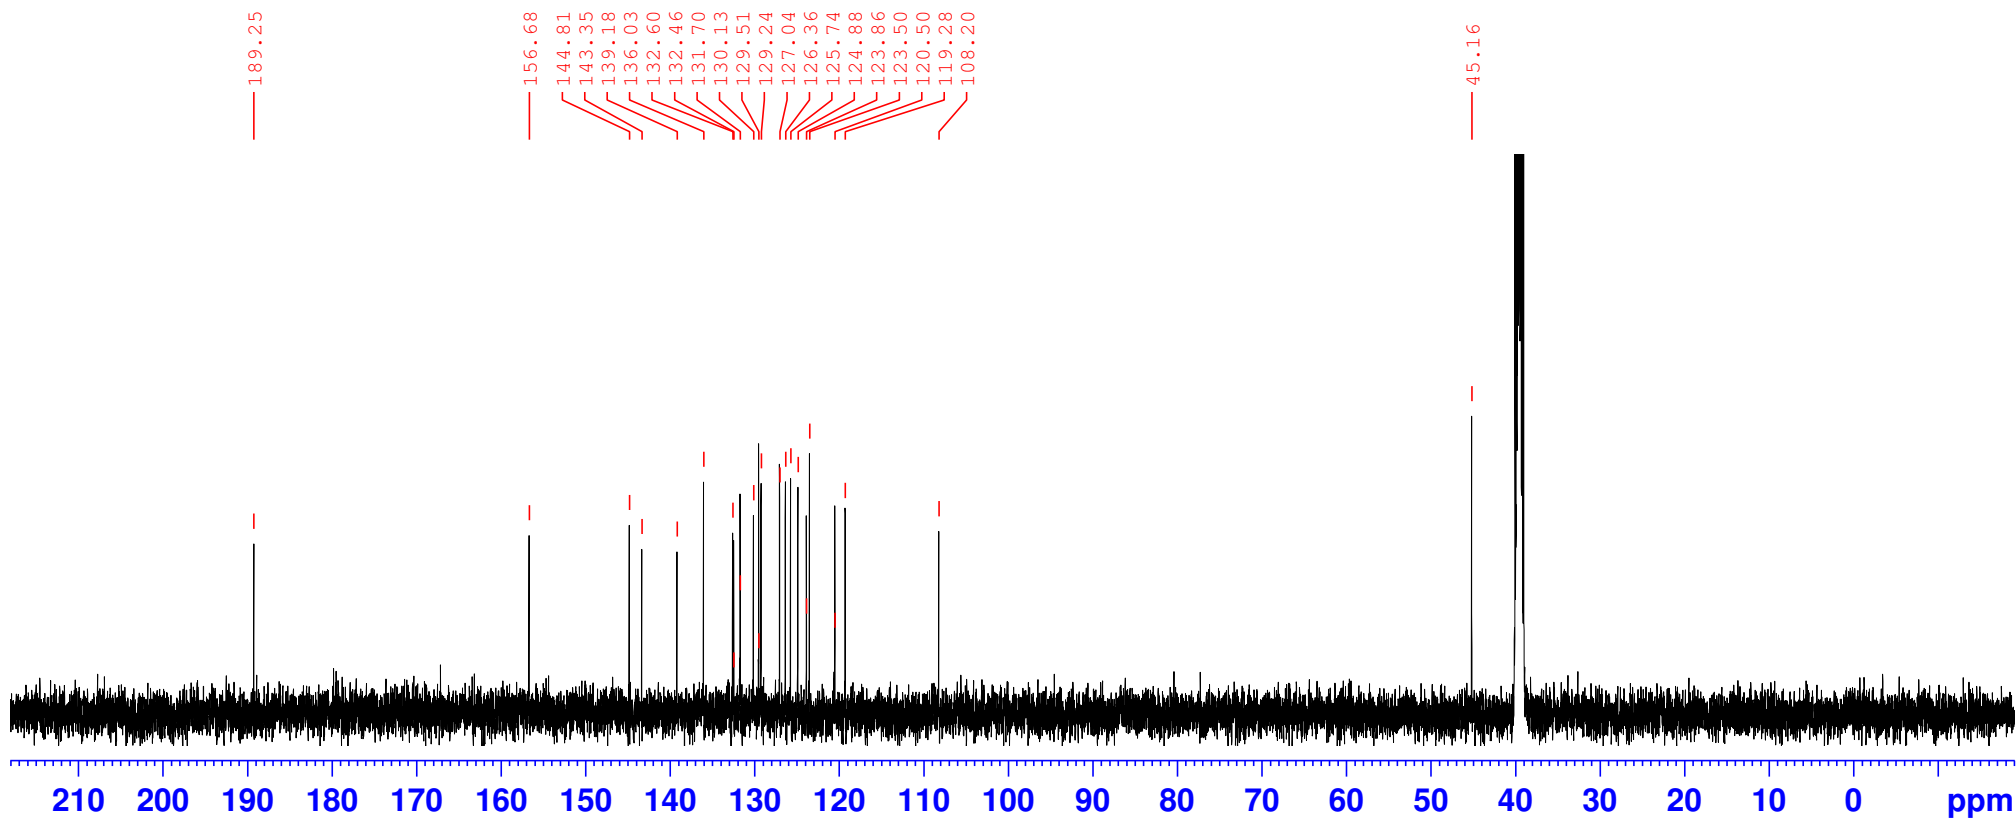

# User Spectrum Plot Report

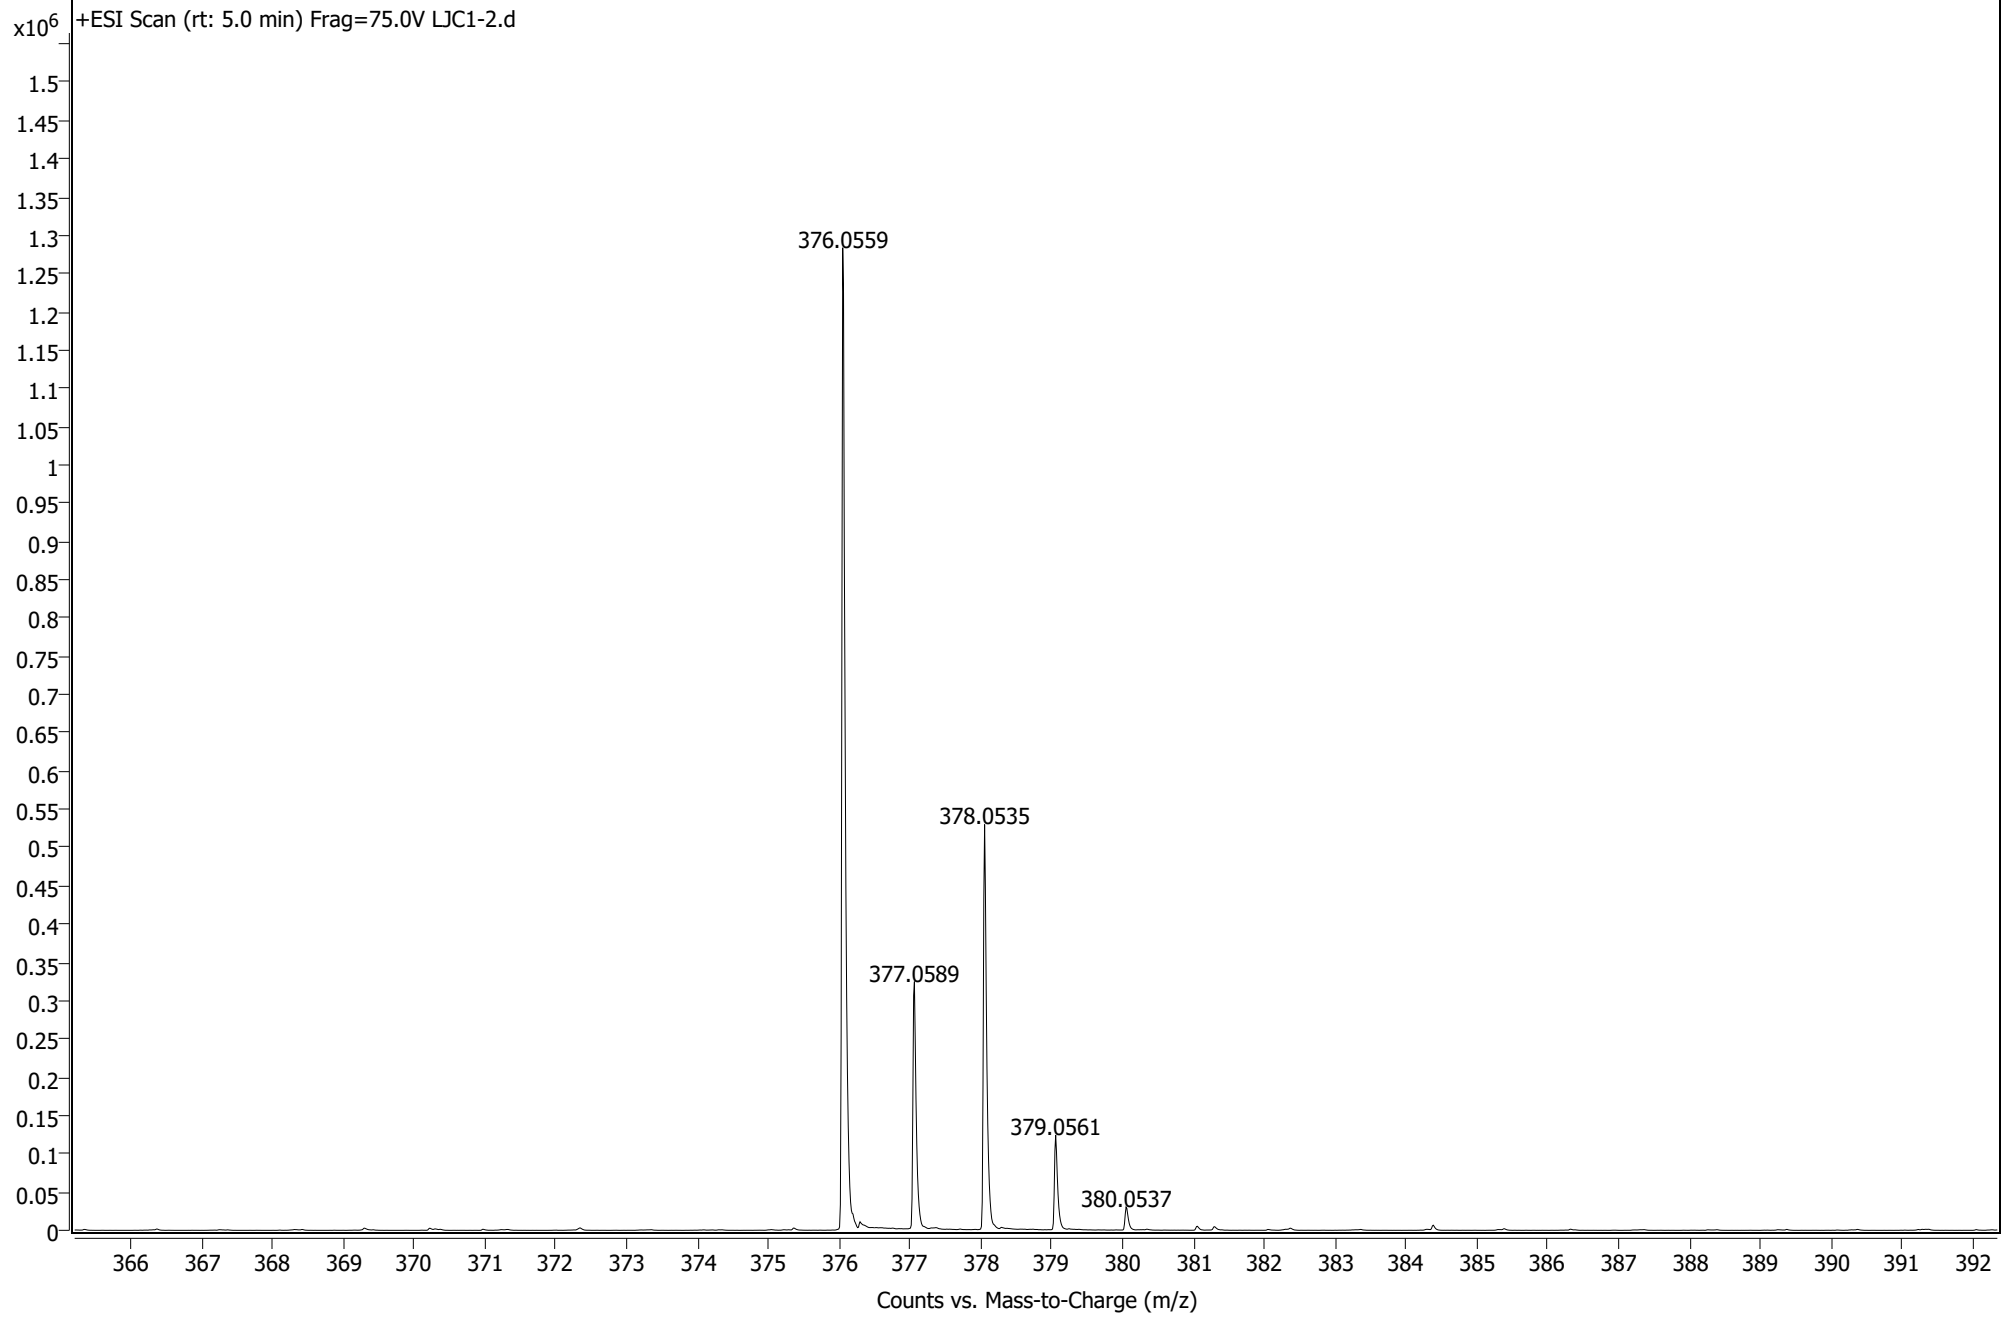

```

=====
Acq. Operator   : SYSTEM                      Seq. Line :    9
Sample Operator : SYSTEM
Acq. Instrument : 1260Infinity2              Location  : P1-B-01
Injection Date  : 2/20/2020 2:26:03 PM       Inj       :    1
                                           Inj Volume: 50.000 µl

Method          : C:\Users\Public\Documents\ChemStation\1\Data\Huihua-MC 2020-02-20 10-53-28
                  \MC-SMALL MOLE.M (Sequence Method)
Last changed    : 2/19/2020 11:54:04 AM by SYSTEM
Additional Info  : Peak(s) manually integrated
  
```

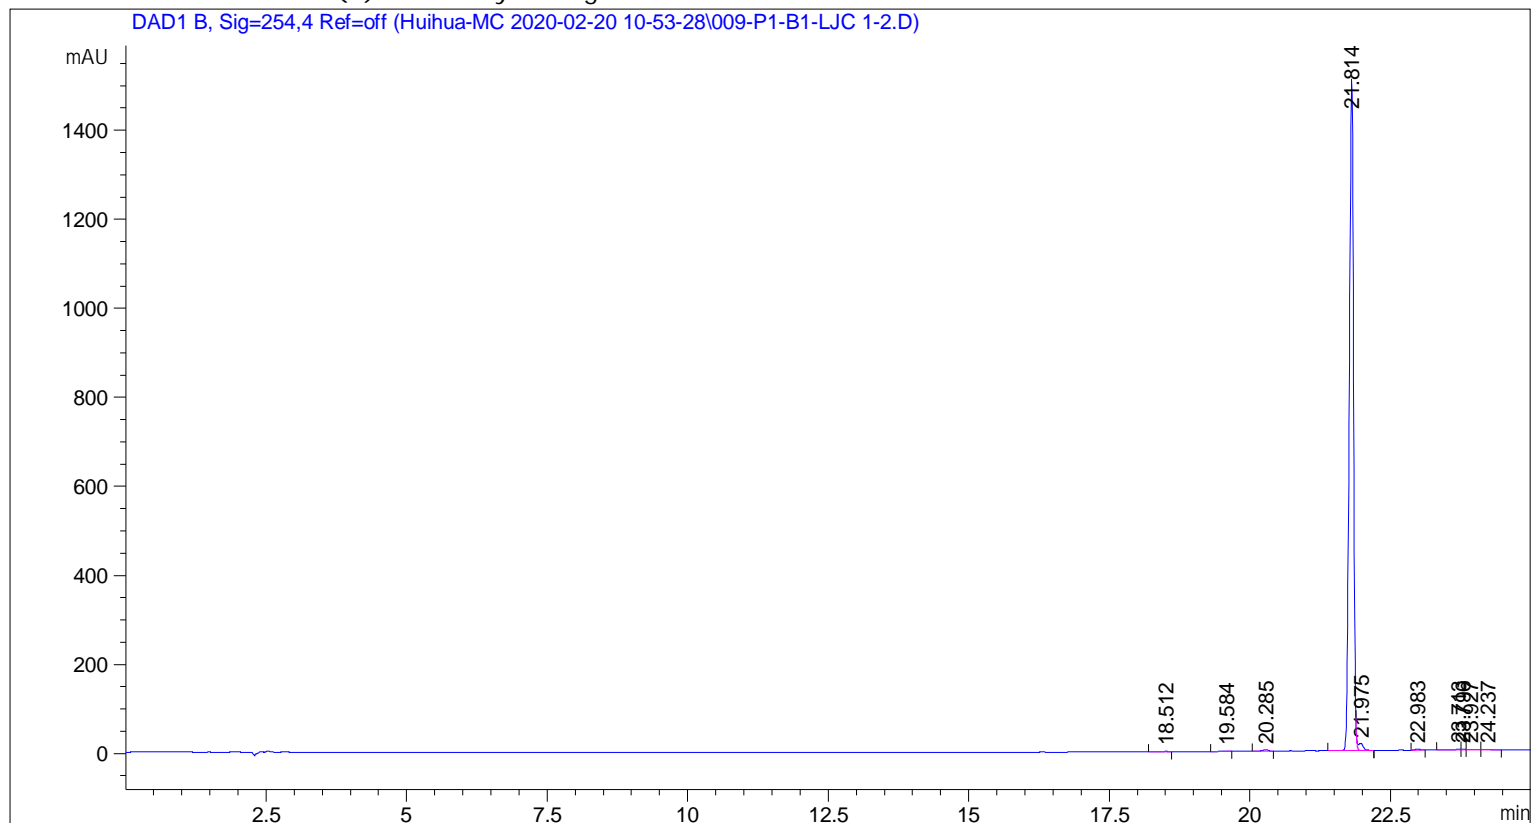

=====  
 Area Percent Report  
 =====

```

Sorted By      : Signal
Multiplier     : 1.0000
Dilution      : 1.0000
Use Multiplier & Dilution Factor with ISTDs
  
```

Signal 1: DAD1 B, Sig=254,4 Ref=off

| Peak # | RetTime [min] | Type | Width [min] | Area [mAU*s] | Height [mAU] | Area %  |
|--------|---------------|------|-------------|--------------|--------------|---------|
| 1      | 18.512        | BB   | 0.1047      | 8.14009      | 1.09586      | 0.1013  |
| 2      | 19.584        | BB   | 0.0948      | 7.19604      | 1.12263      | 0.0895  |
| 3      | 20.285        | BB   | 0.1072      | 24.30151     | 3.49124      | 0.3023  |
| 4      | 21.814        | BV R | 0.0806      | 7830.76221   | 1508.22754   | 97.4197 |
| 5      | 21.975        | VB E | 0.0917      | 96.65552     | 15.72954     | 1.2025  |
| 6      | 22.983        | BB   | 0.0878      | 15.89518     | 2.73559      | 0.1977  |
| 7      | 23.713        | BV   | 0.1234      | 16.67326     | 1.81107      | 0.2074  |
| 8      | 23.796        | VV   | 0.0712      | 6.57142      | 1.34045      | 0.0818  |

| Peak # | RetTime [min] | Type | Width [min] | Area [mAU*s] | Height [mAU] | Area % |
|--------|---------------|------|-------------|--------------|--------------|--------|
| 9      | 23.927        | VV   | 0.1472      | 15.77227     | 1.40241      | 0.1962 |
| 10     | 24.237        | VB   | 0.1176      | 16.20648     | 1.86166      | 0.2016 |

Totals :                                   8038.17398 1538.81798

=====  
\*\*\* End of Report \*\*\*

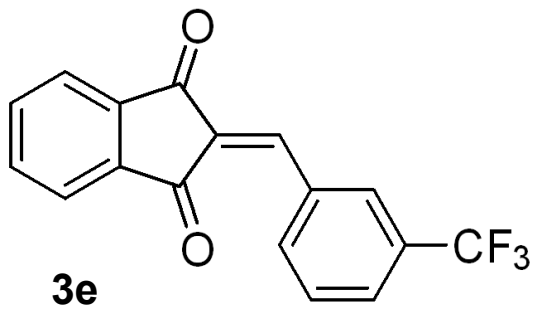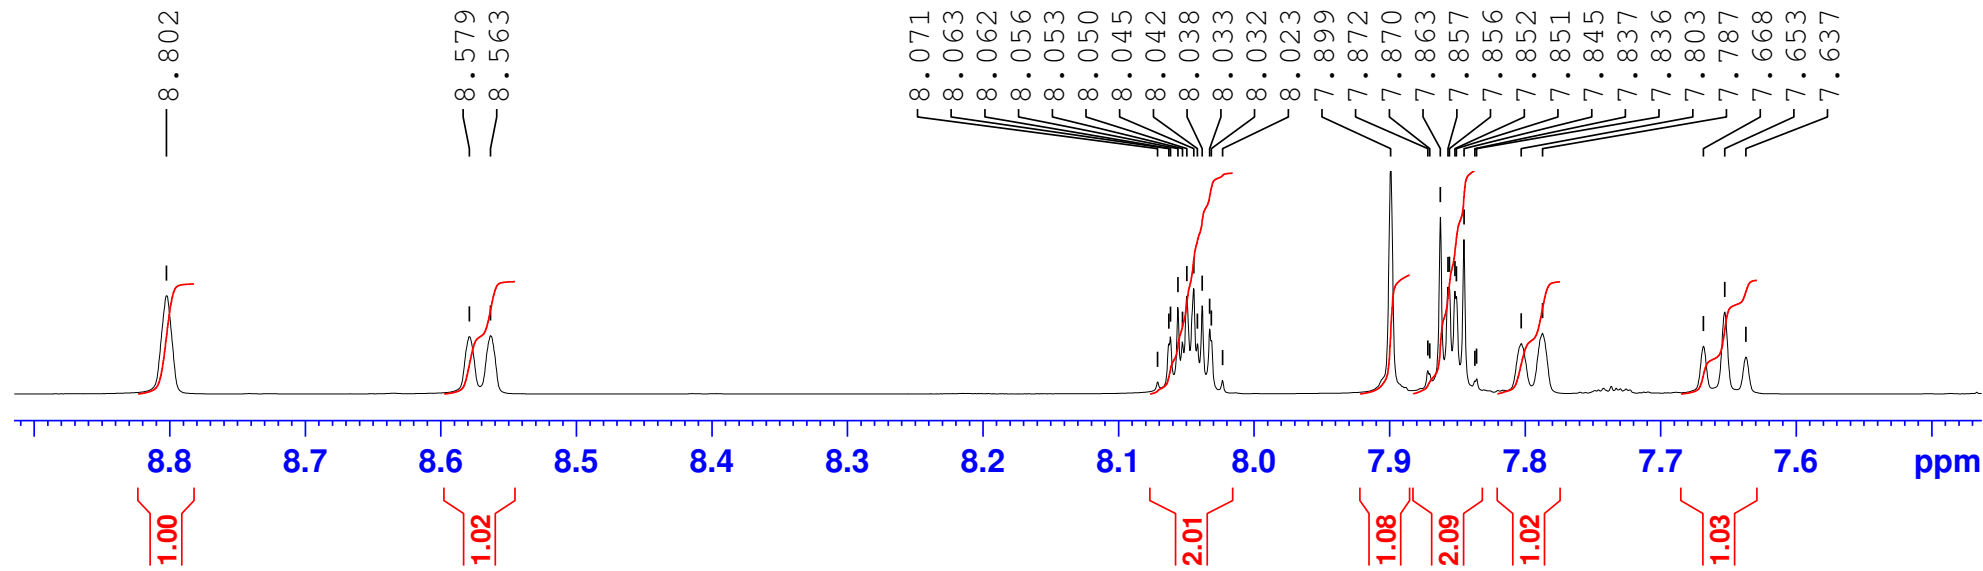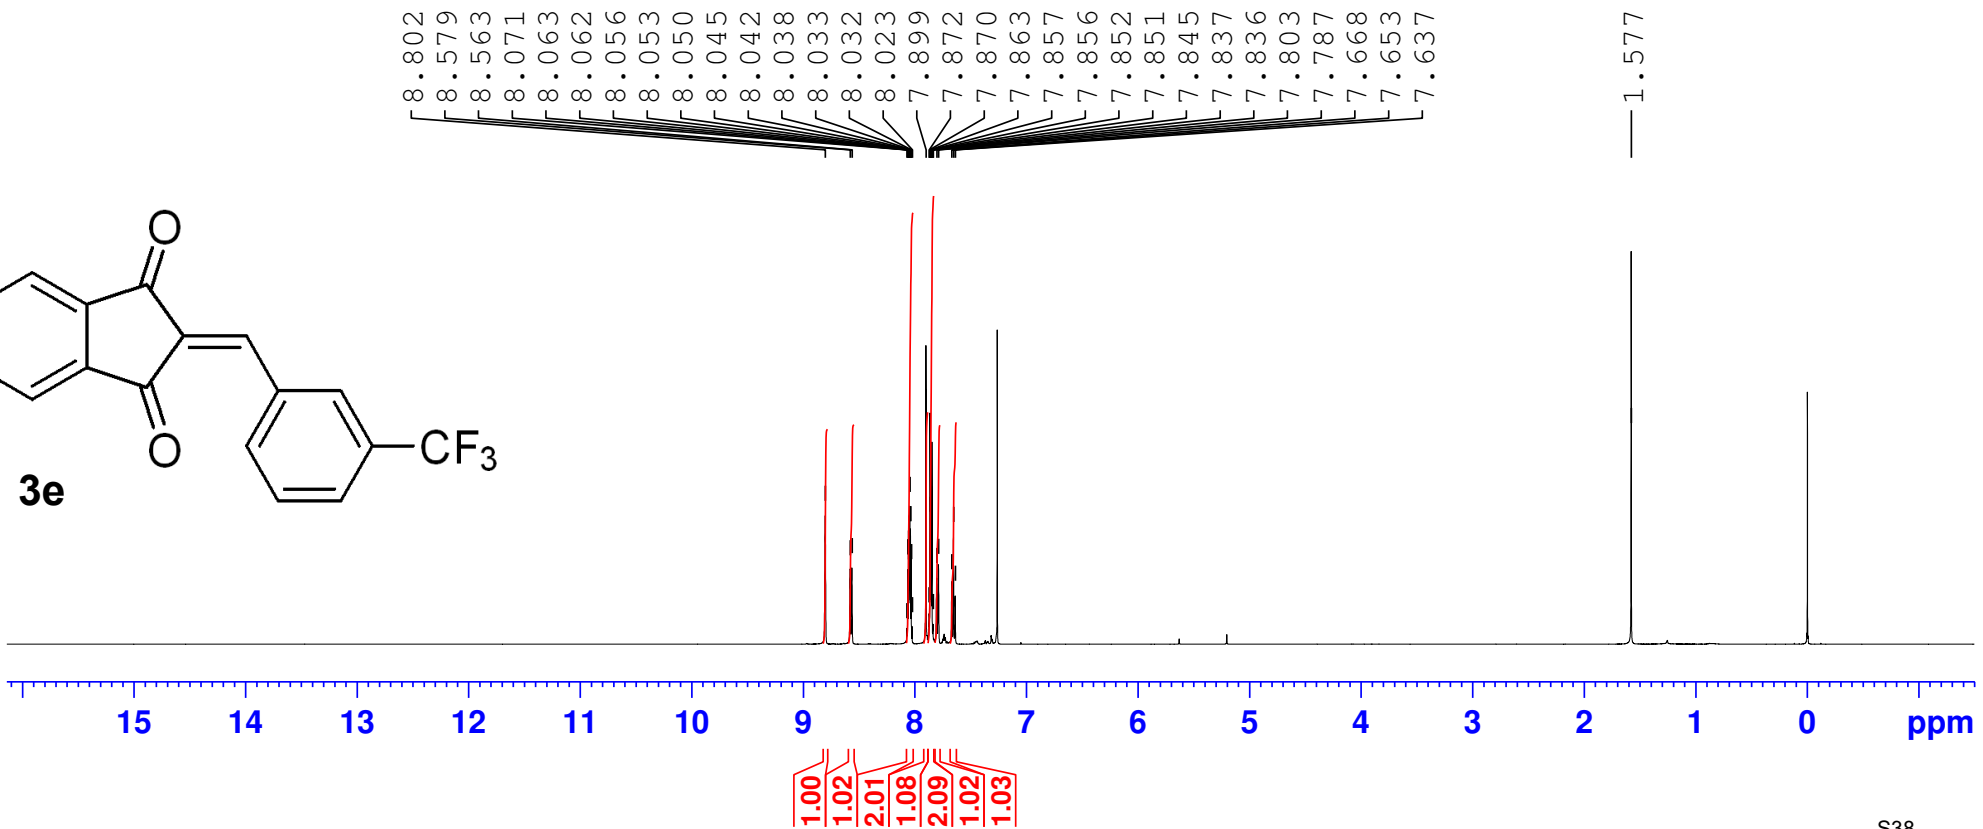

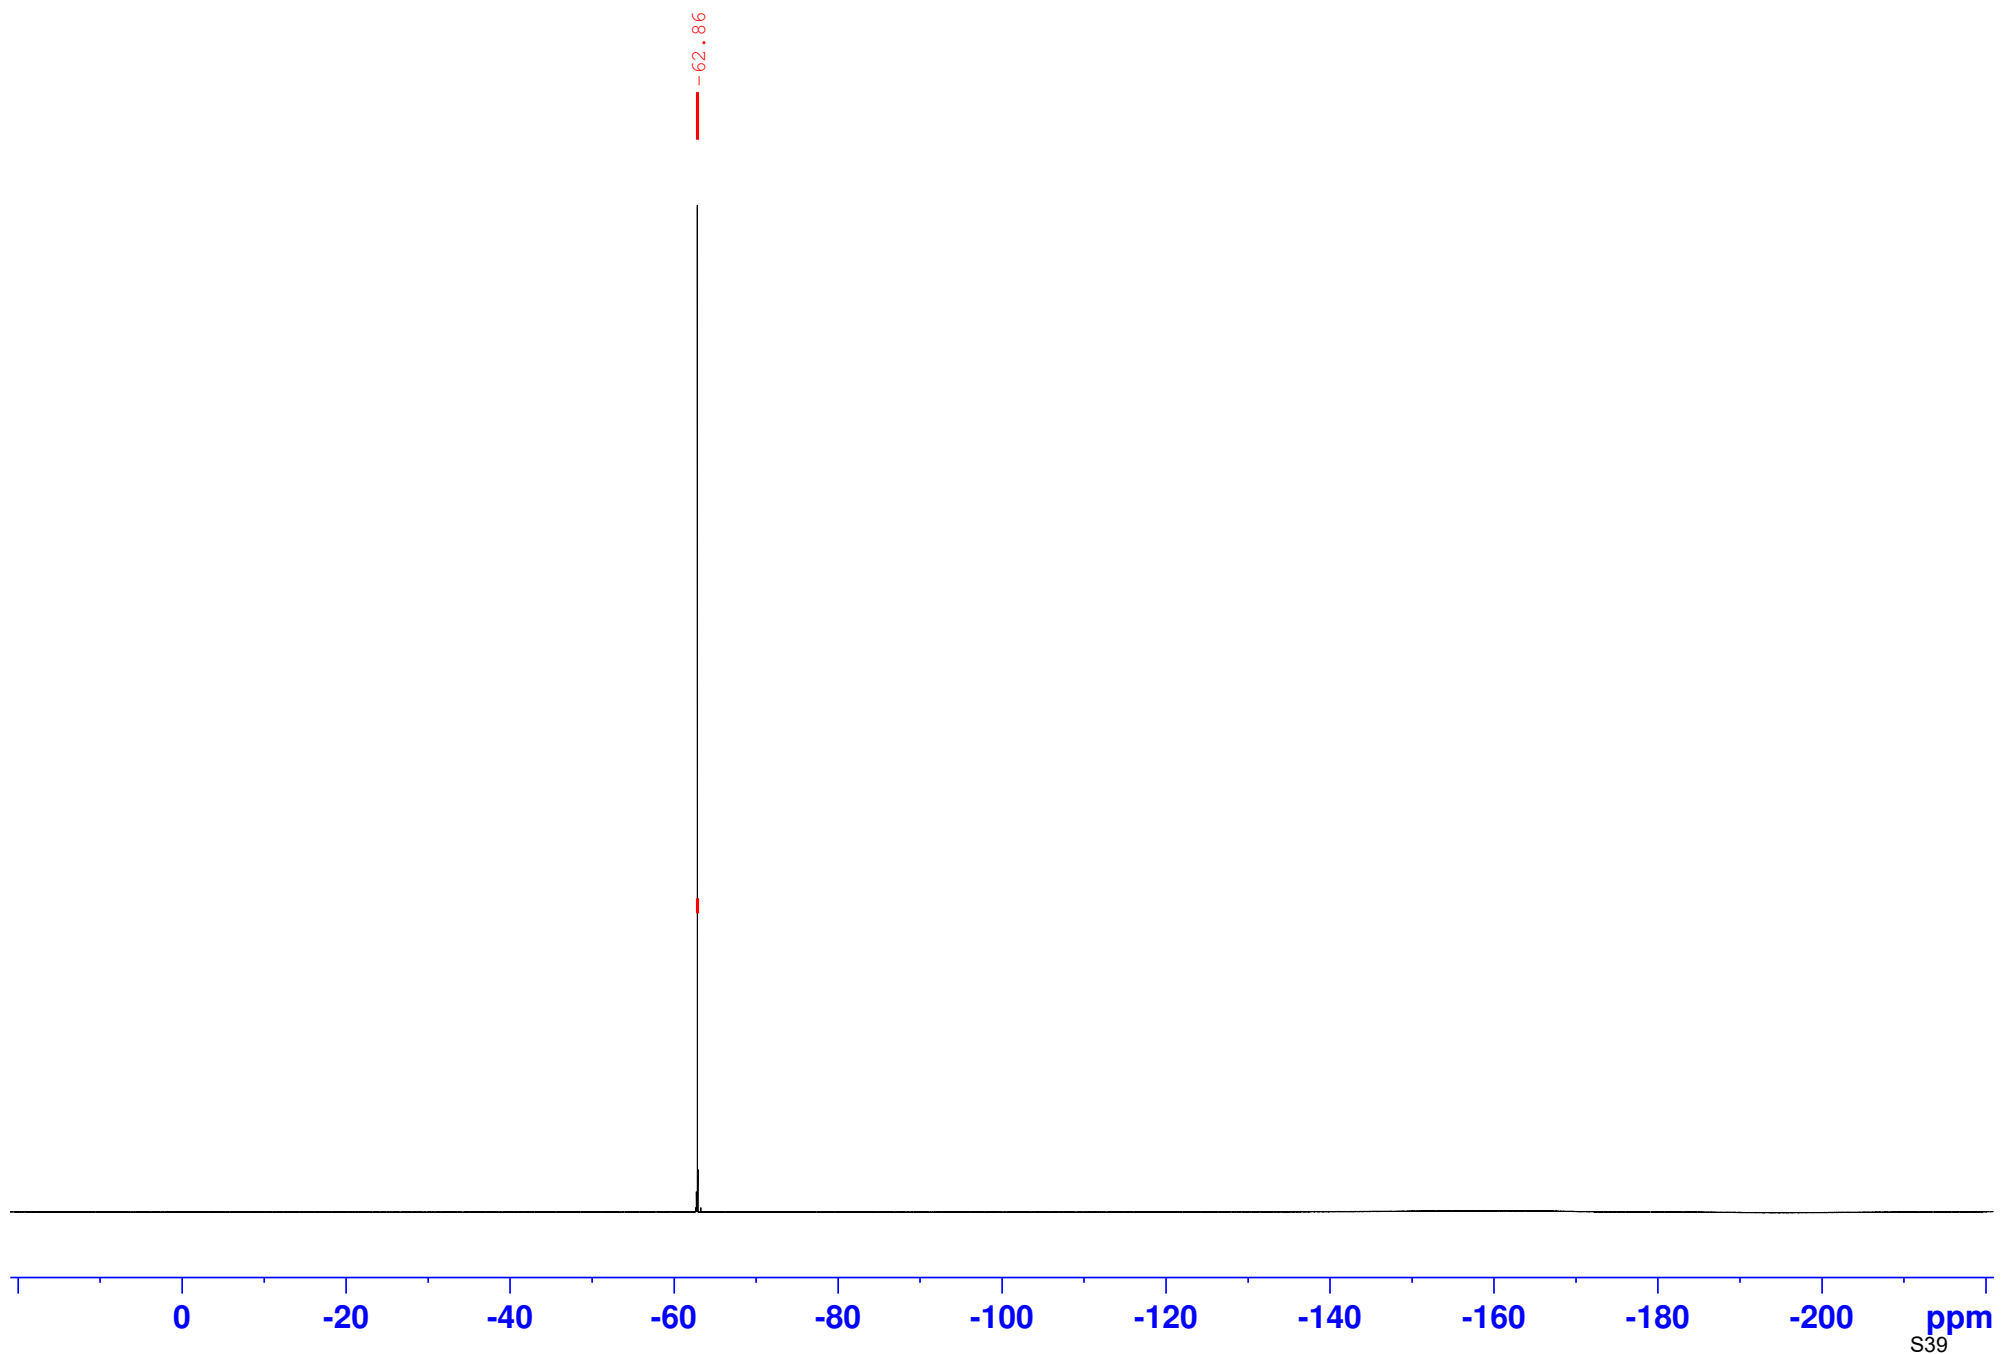

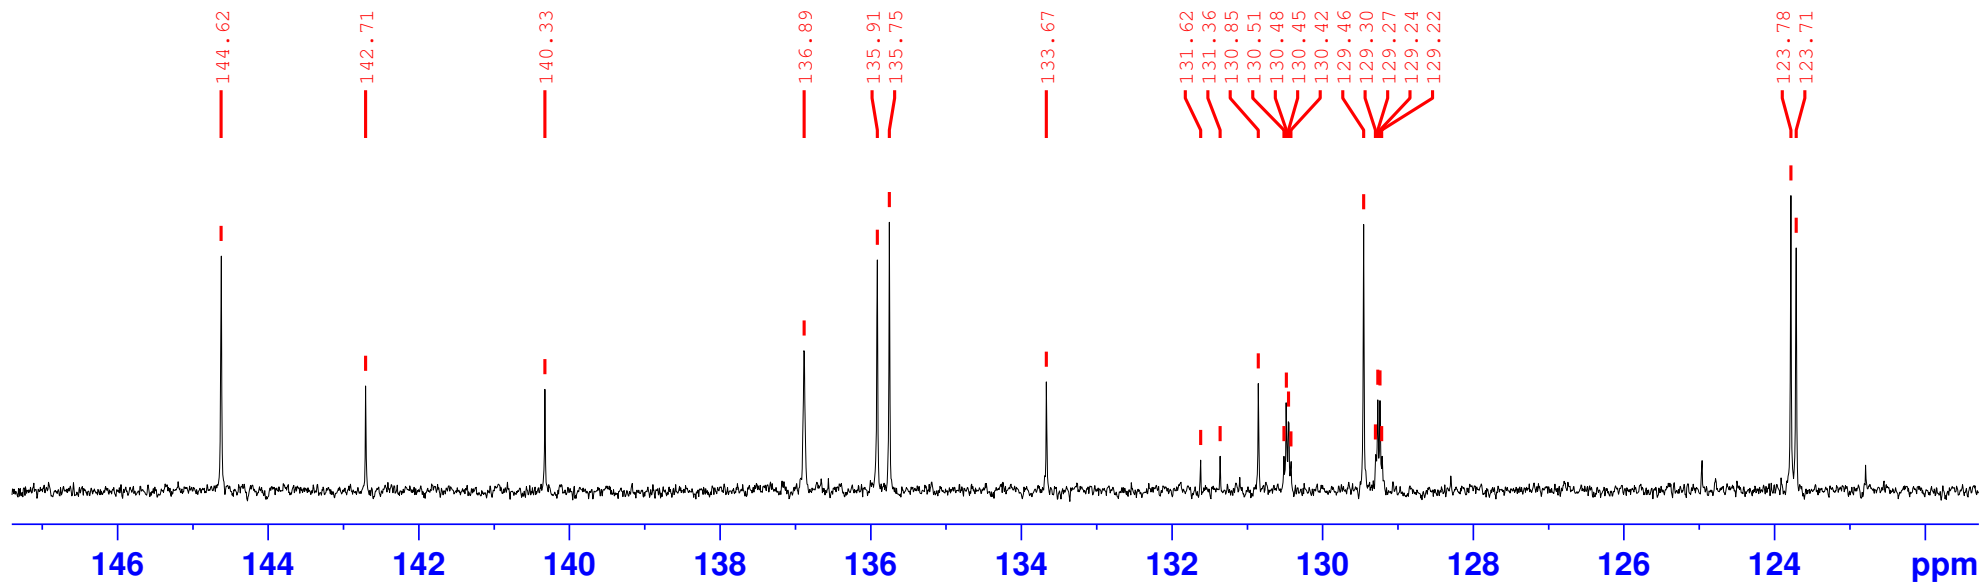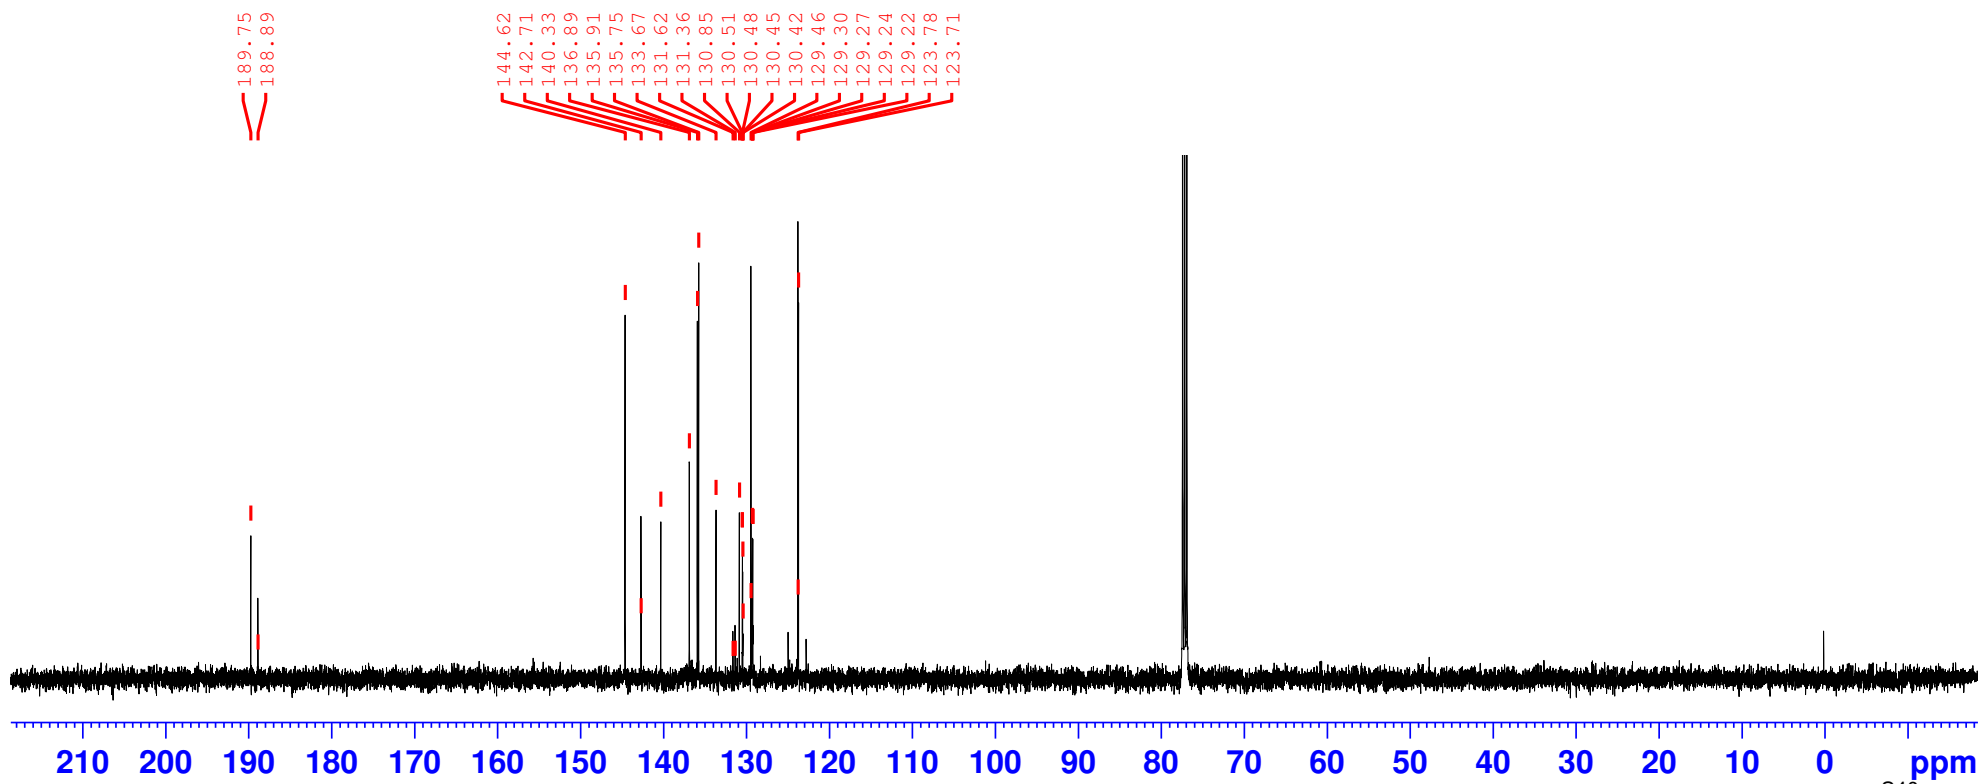



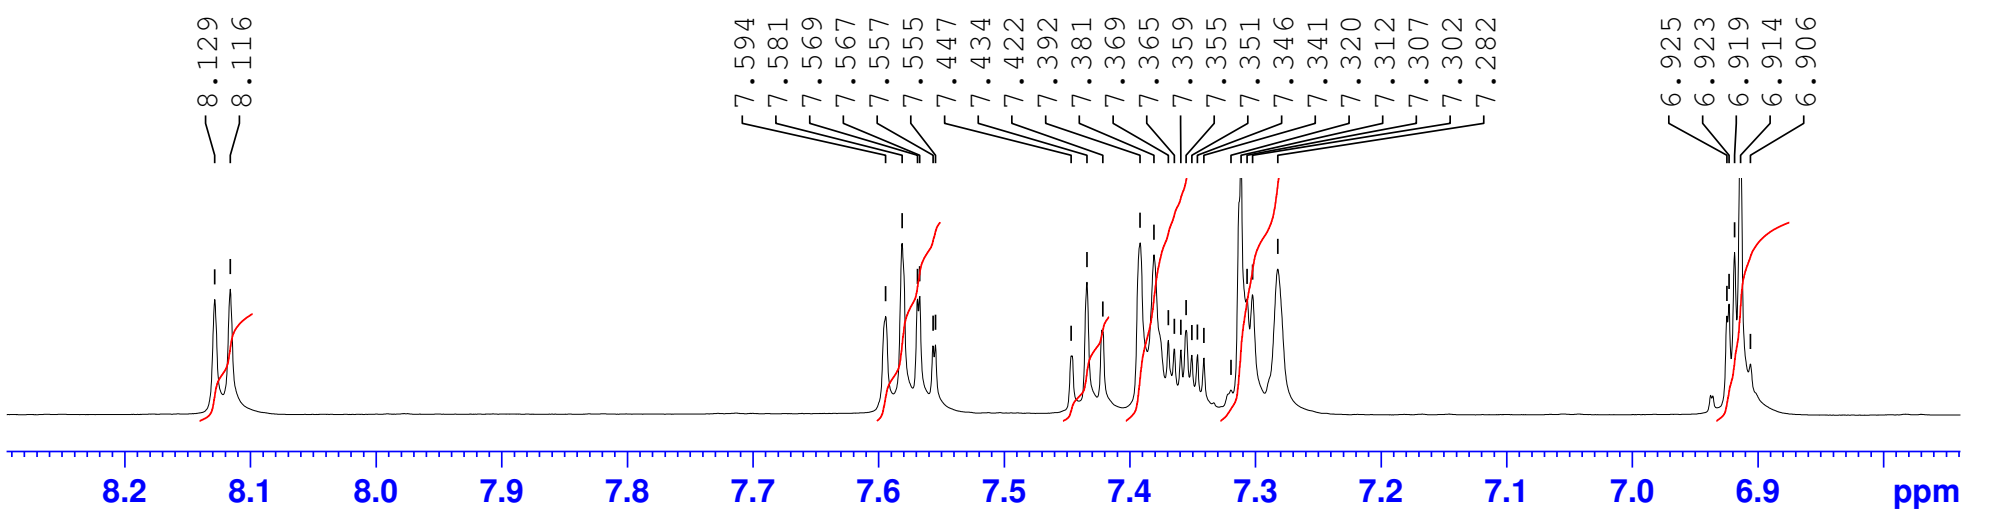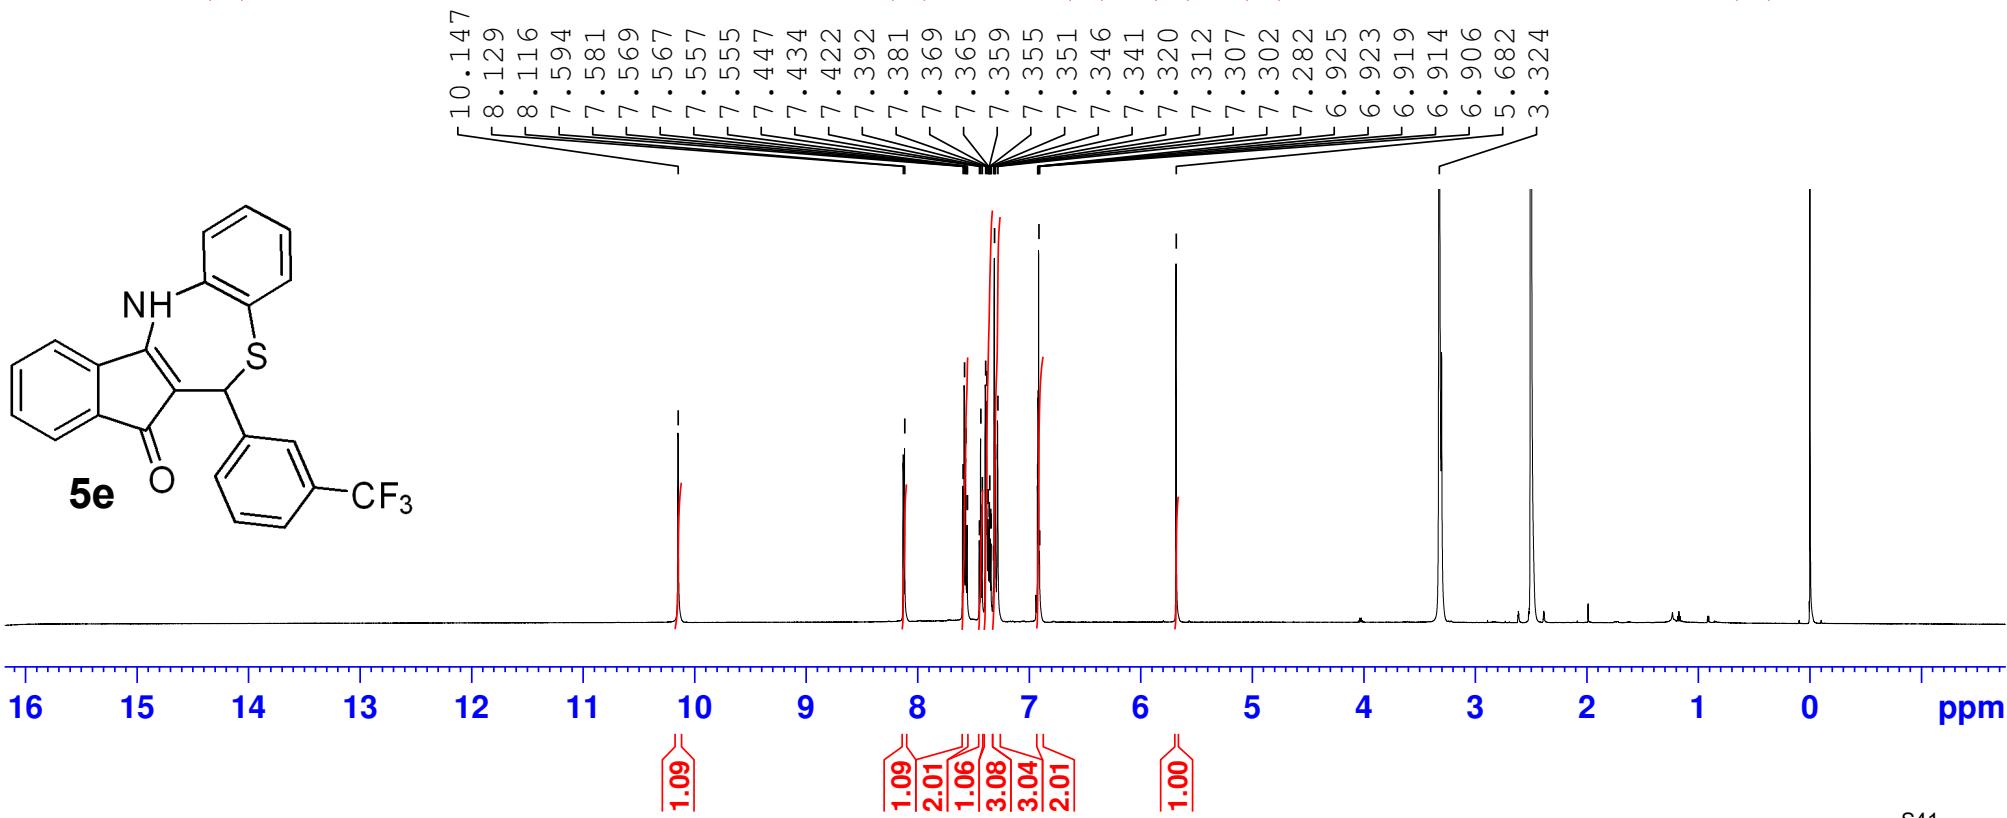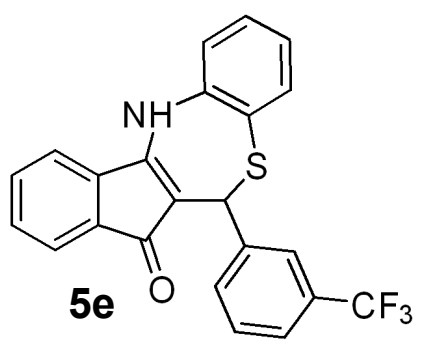

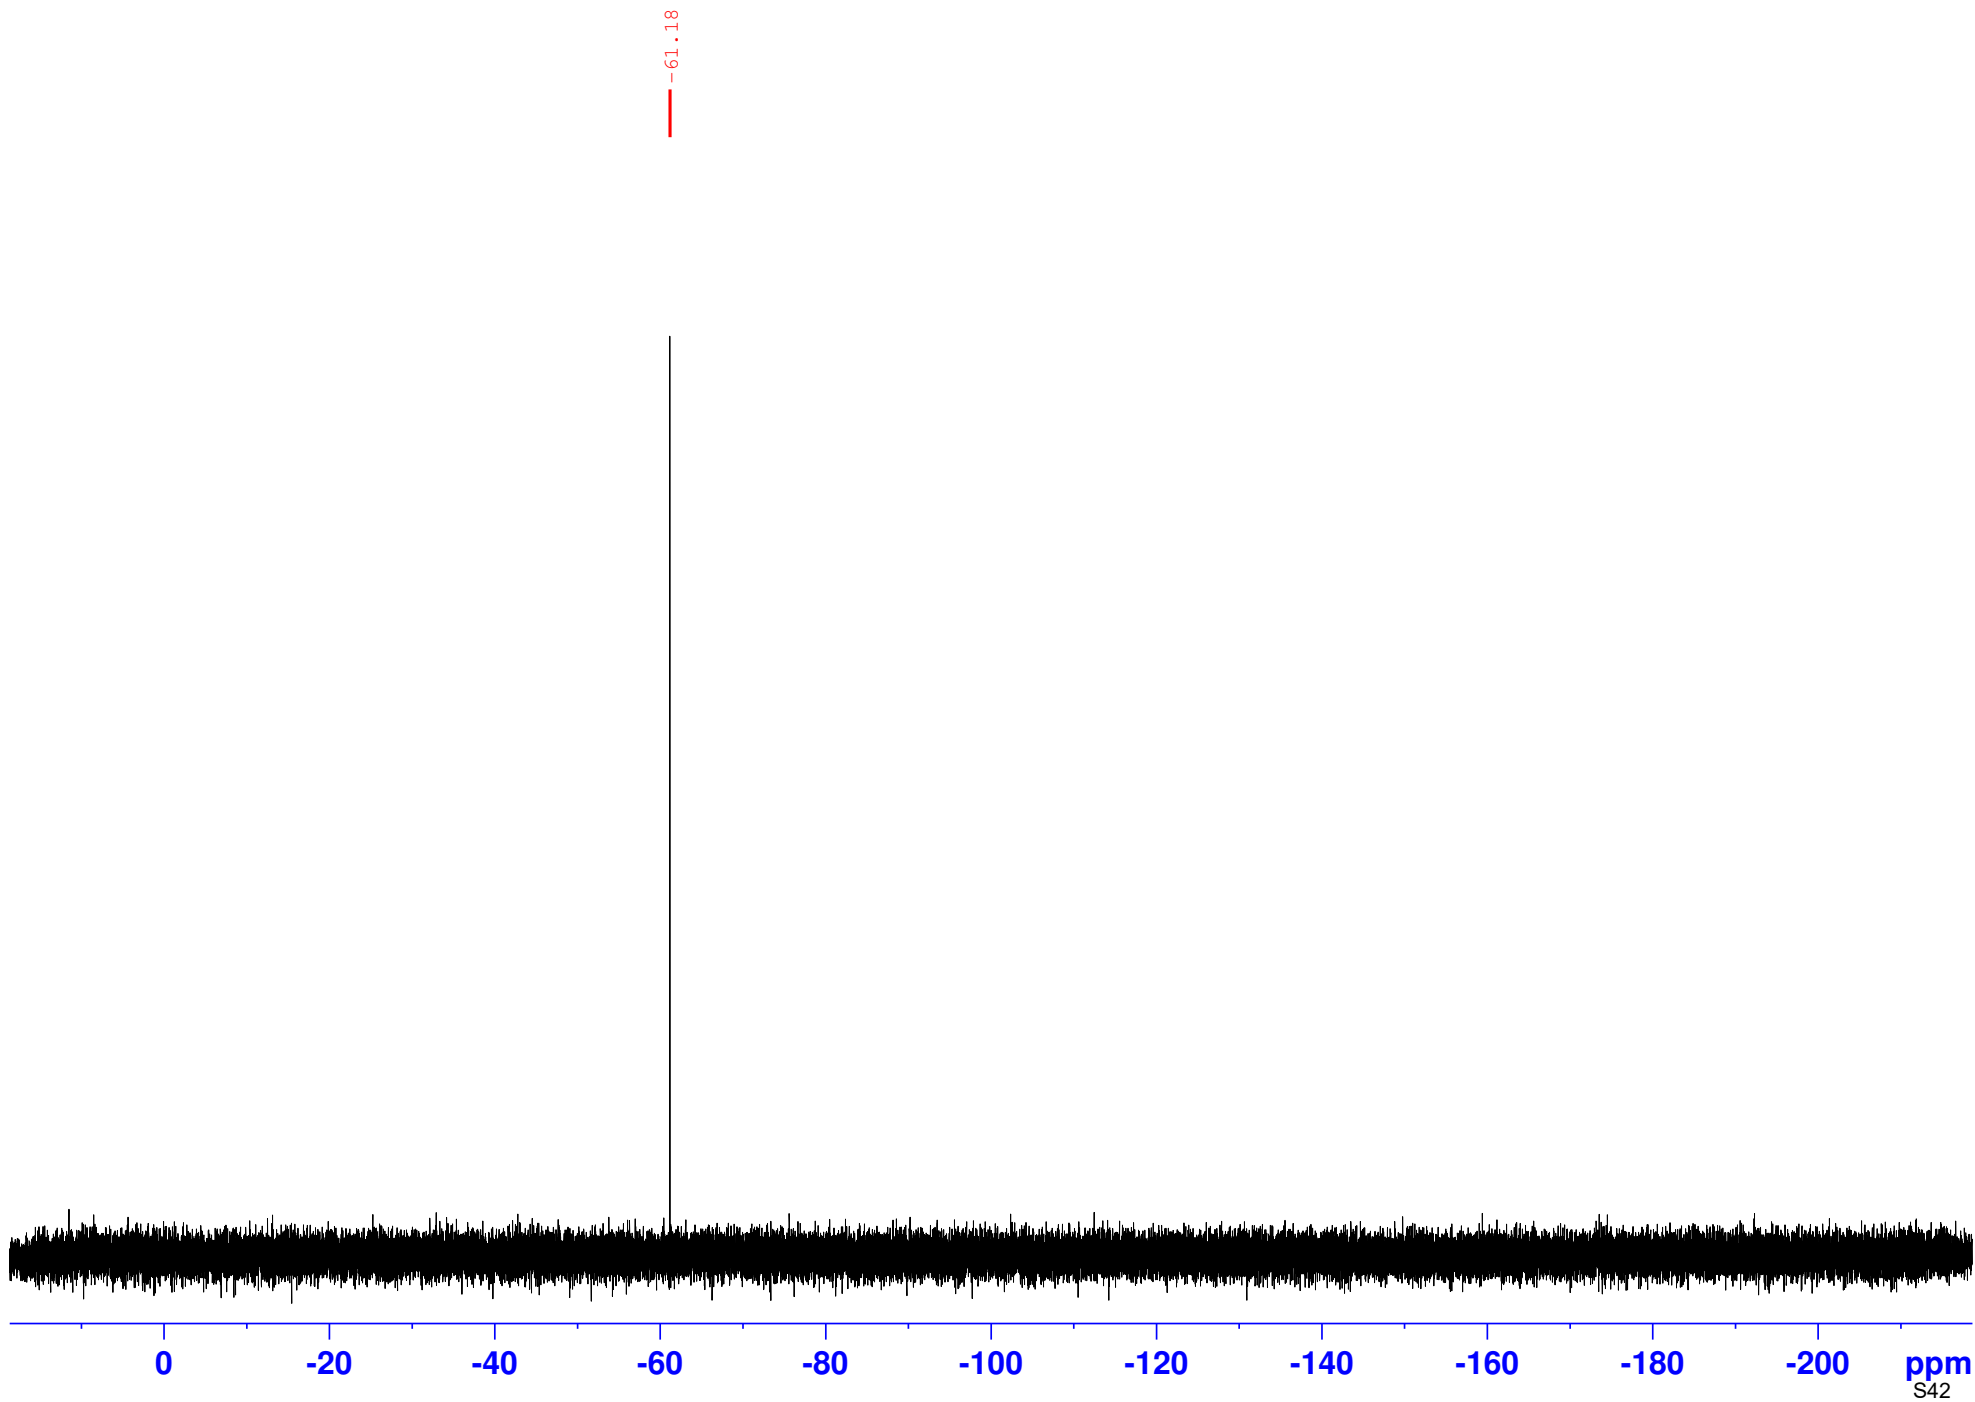

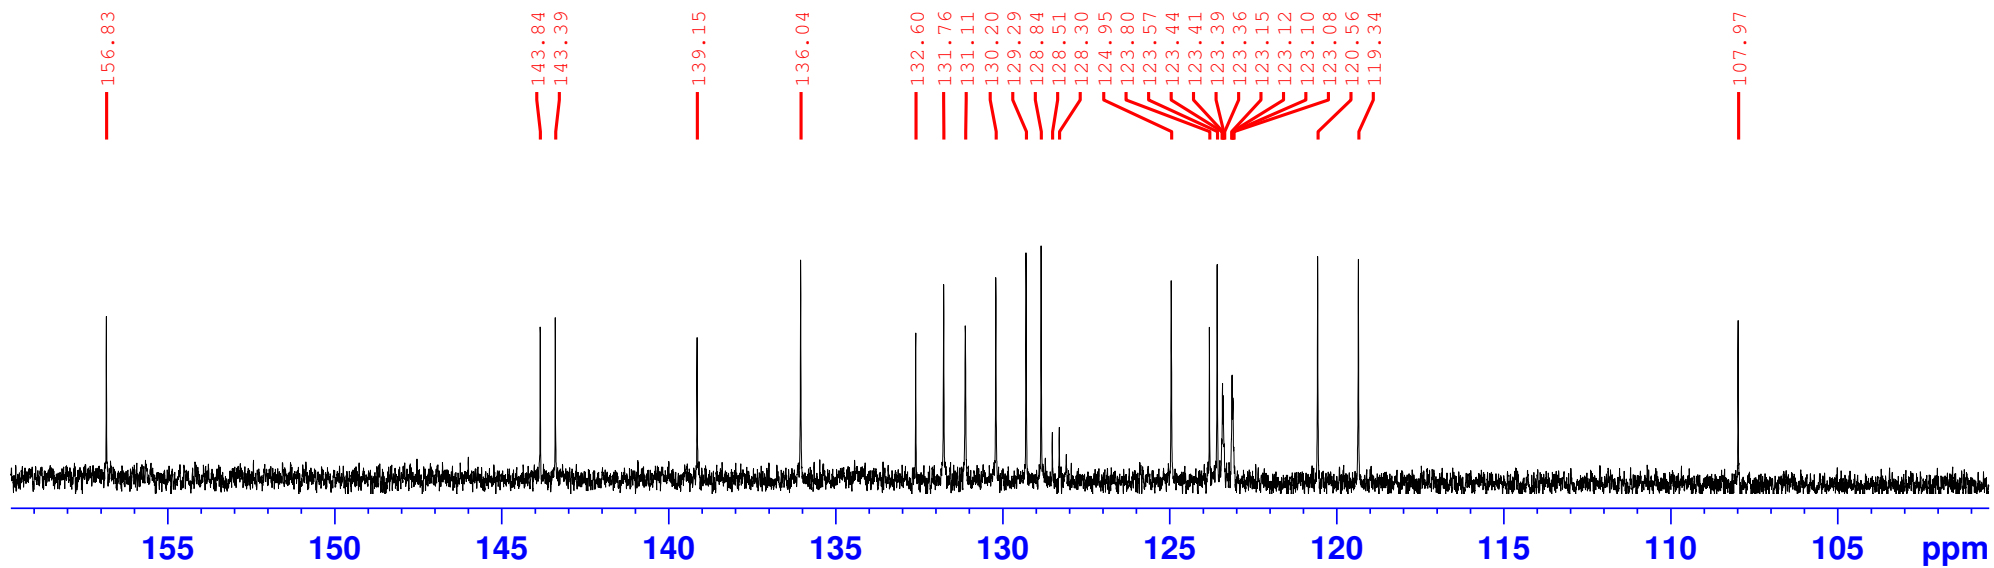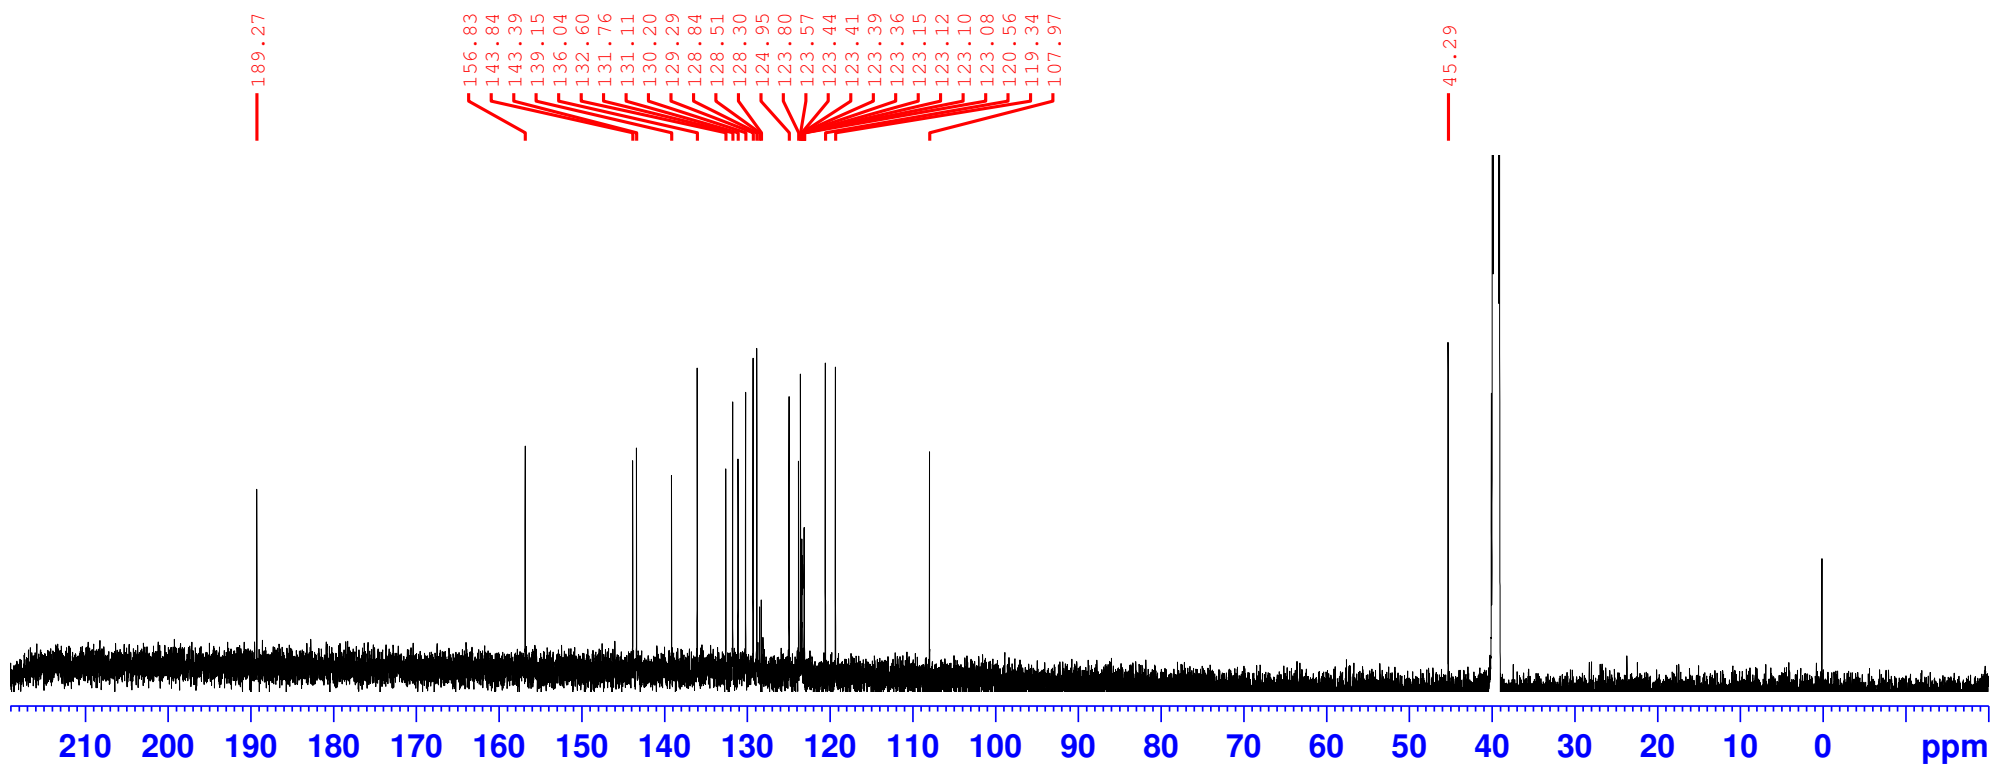

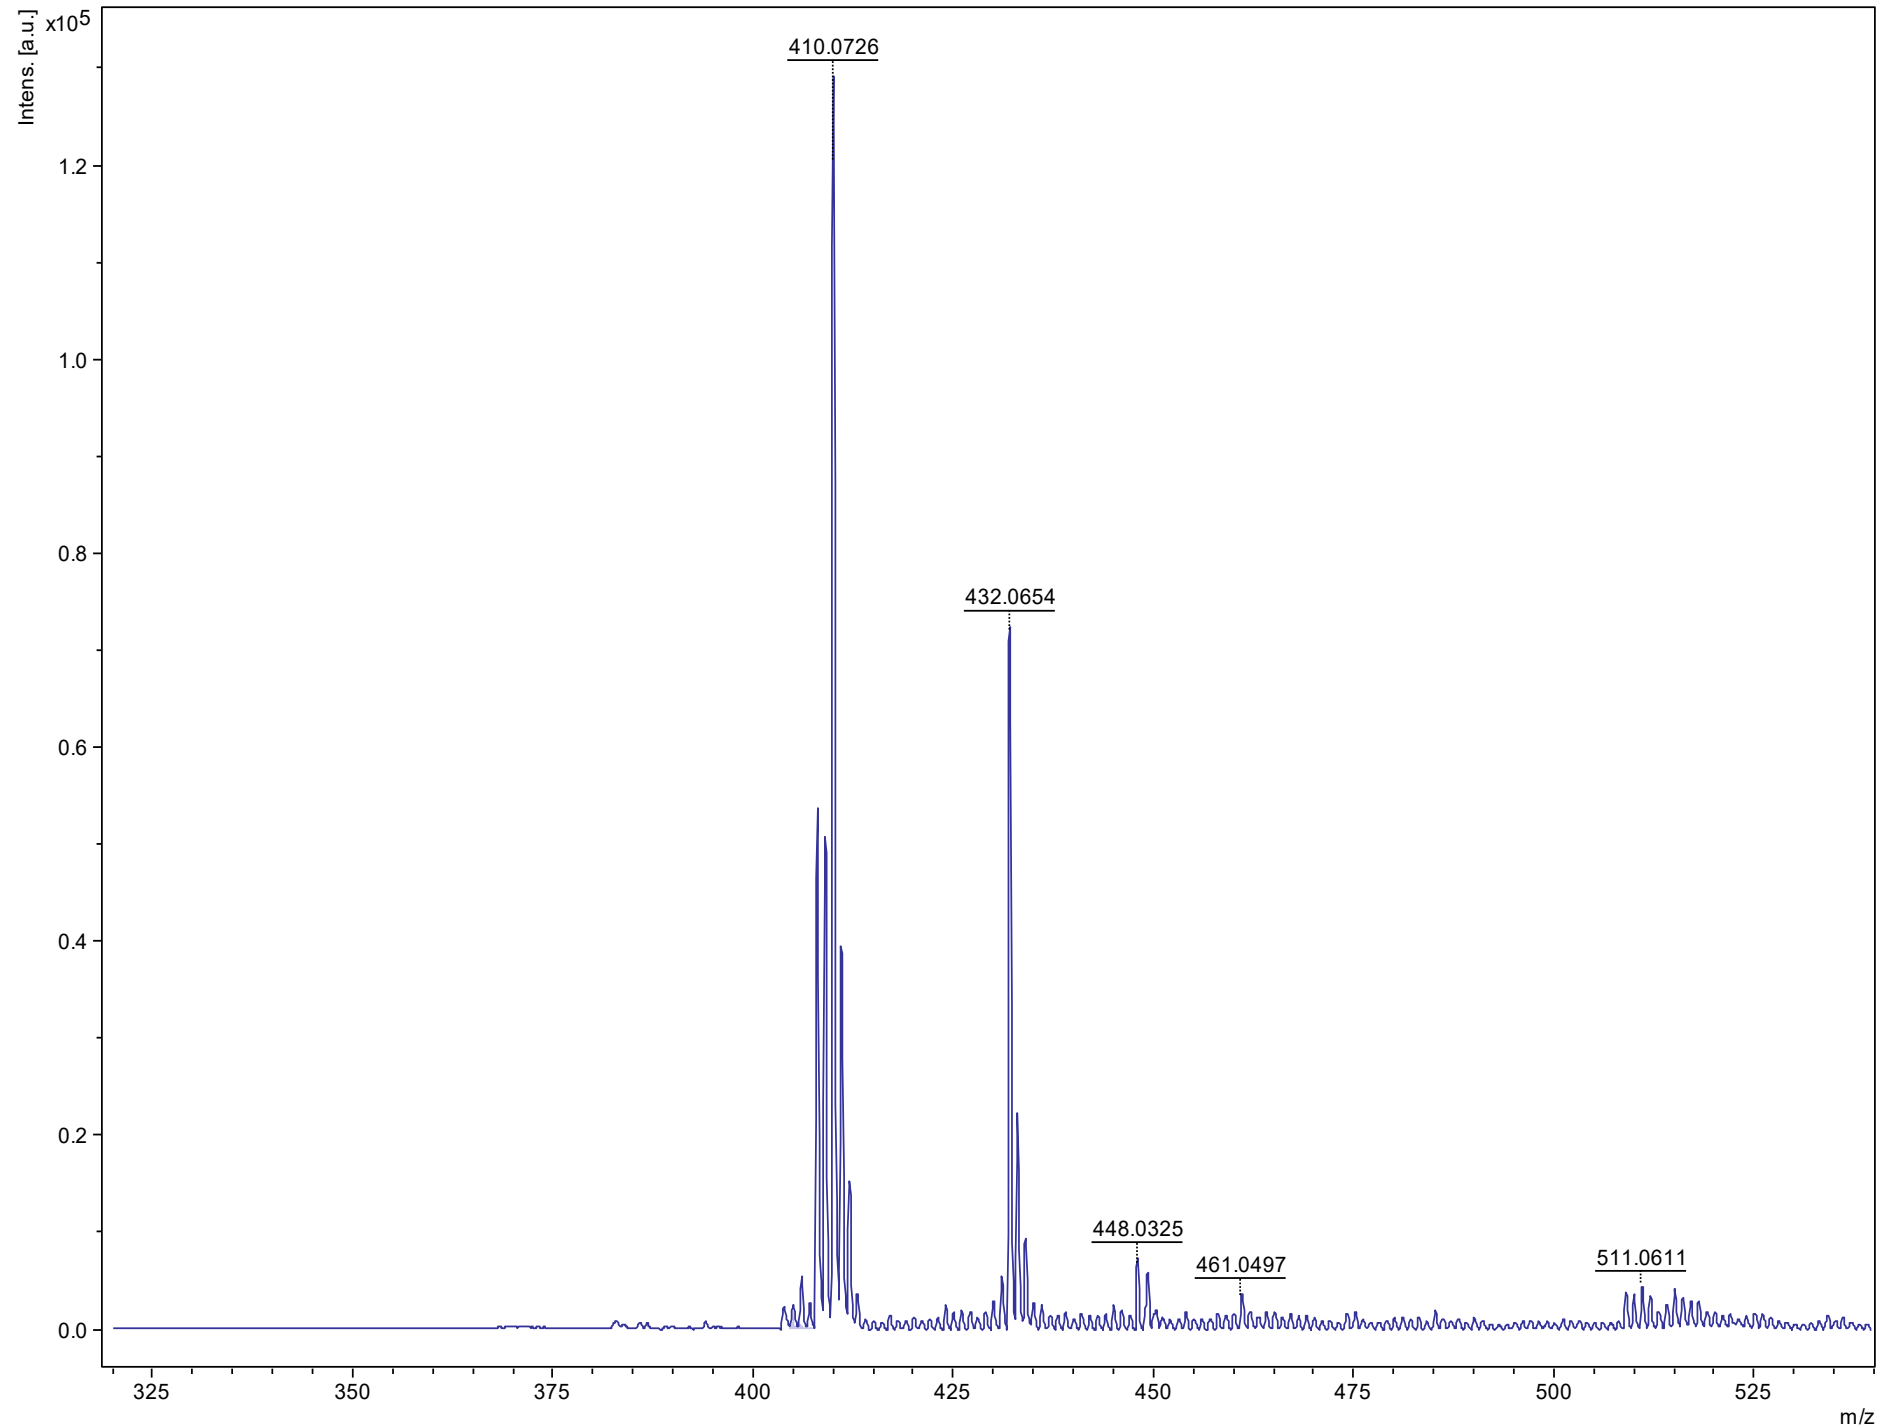

Sample Name: LJC1-4

```

=====
Acq. Operator   : SYSTEM                      Seq. Line :    5
Sample Operator : SYSTEM
Acq. Instrument : 1260Infinity2              Location  : P1-C-04
Injection Date  : 3/24/2020 3:47:35 PM      Inj       :    1
                                           Inj Volume: 50.000 µl
Method          : C:\Users\Public\Documents\ChemStation\1\Data\Huihua-MC 2020-03-24 14-05-23
                  \MC-SMALL MOLE.M (Sequence Method)
Last changed    : 2/19/2020 11:54:04 AM by SYSTEM
Additional Info : Peak(s) manually integrated
=====

```

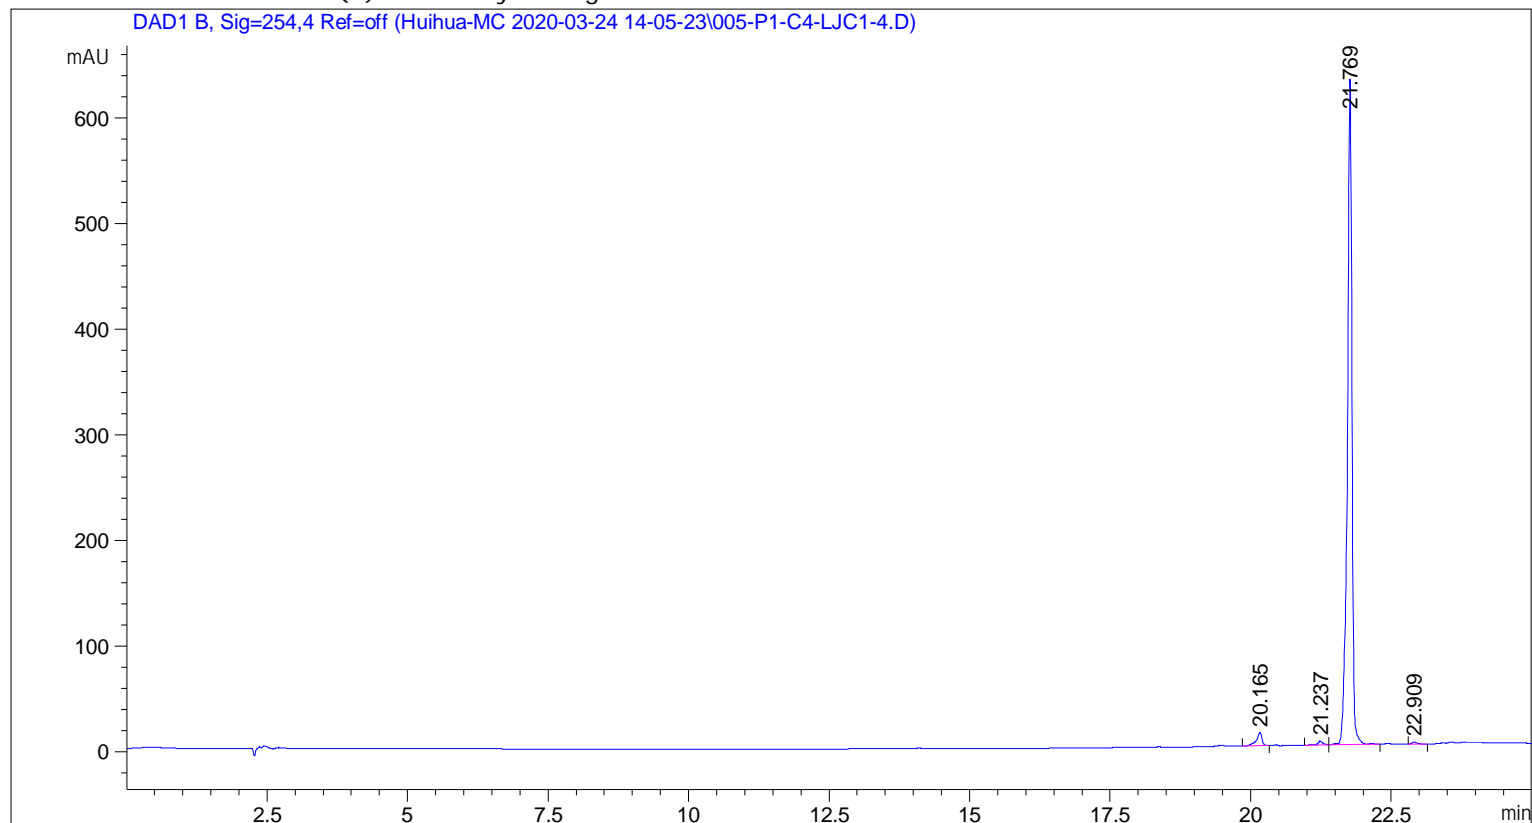

```

=====
                          Area Percent Report
=====

```

```

Sorted By      :      Signal
Multiplier     :      1.0000
Dilution       :      1.0000
Use Multiplier & Dilution Factor with ISTDs

```

Signal 1: DAD1 B, Sig=254,4 Ref=off

| Peak # | RetTime [min] | Type | Width [min] | Area [mAU*s] | Height [mAU] | Area %  |
|--------|---------------|------|-------------|--------------|--------------|---------|
| 1      | 20.165        | BB   | 0.0998      | 87.45600     | 12.47928     | 2.3975  |
| 2      | 21.237        | BB   | 0.0884      | 20.89450     | 3.46431      | 0.5728  |
| 3      | 21.769        | VV R | 0.0834      | 3528.32349   | 629.36877    | 96.7267 |
| 4      | 22.909        | BB   | 0.0939      | 11.04991     | 1.74431      | 0.3029  |

```
Totals :                      3647.72389  647.05667
```

=====  
\*\*\* End of Report \*\*\*

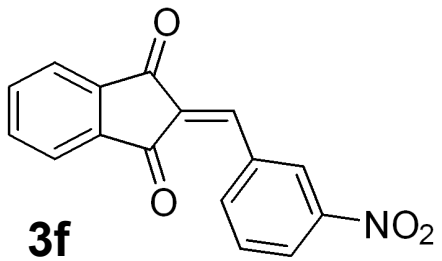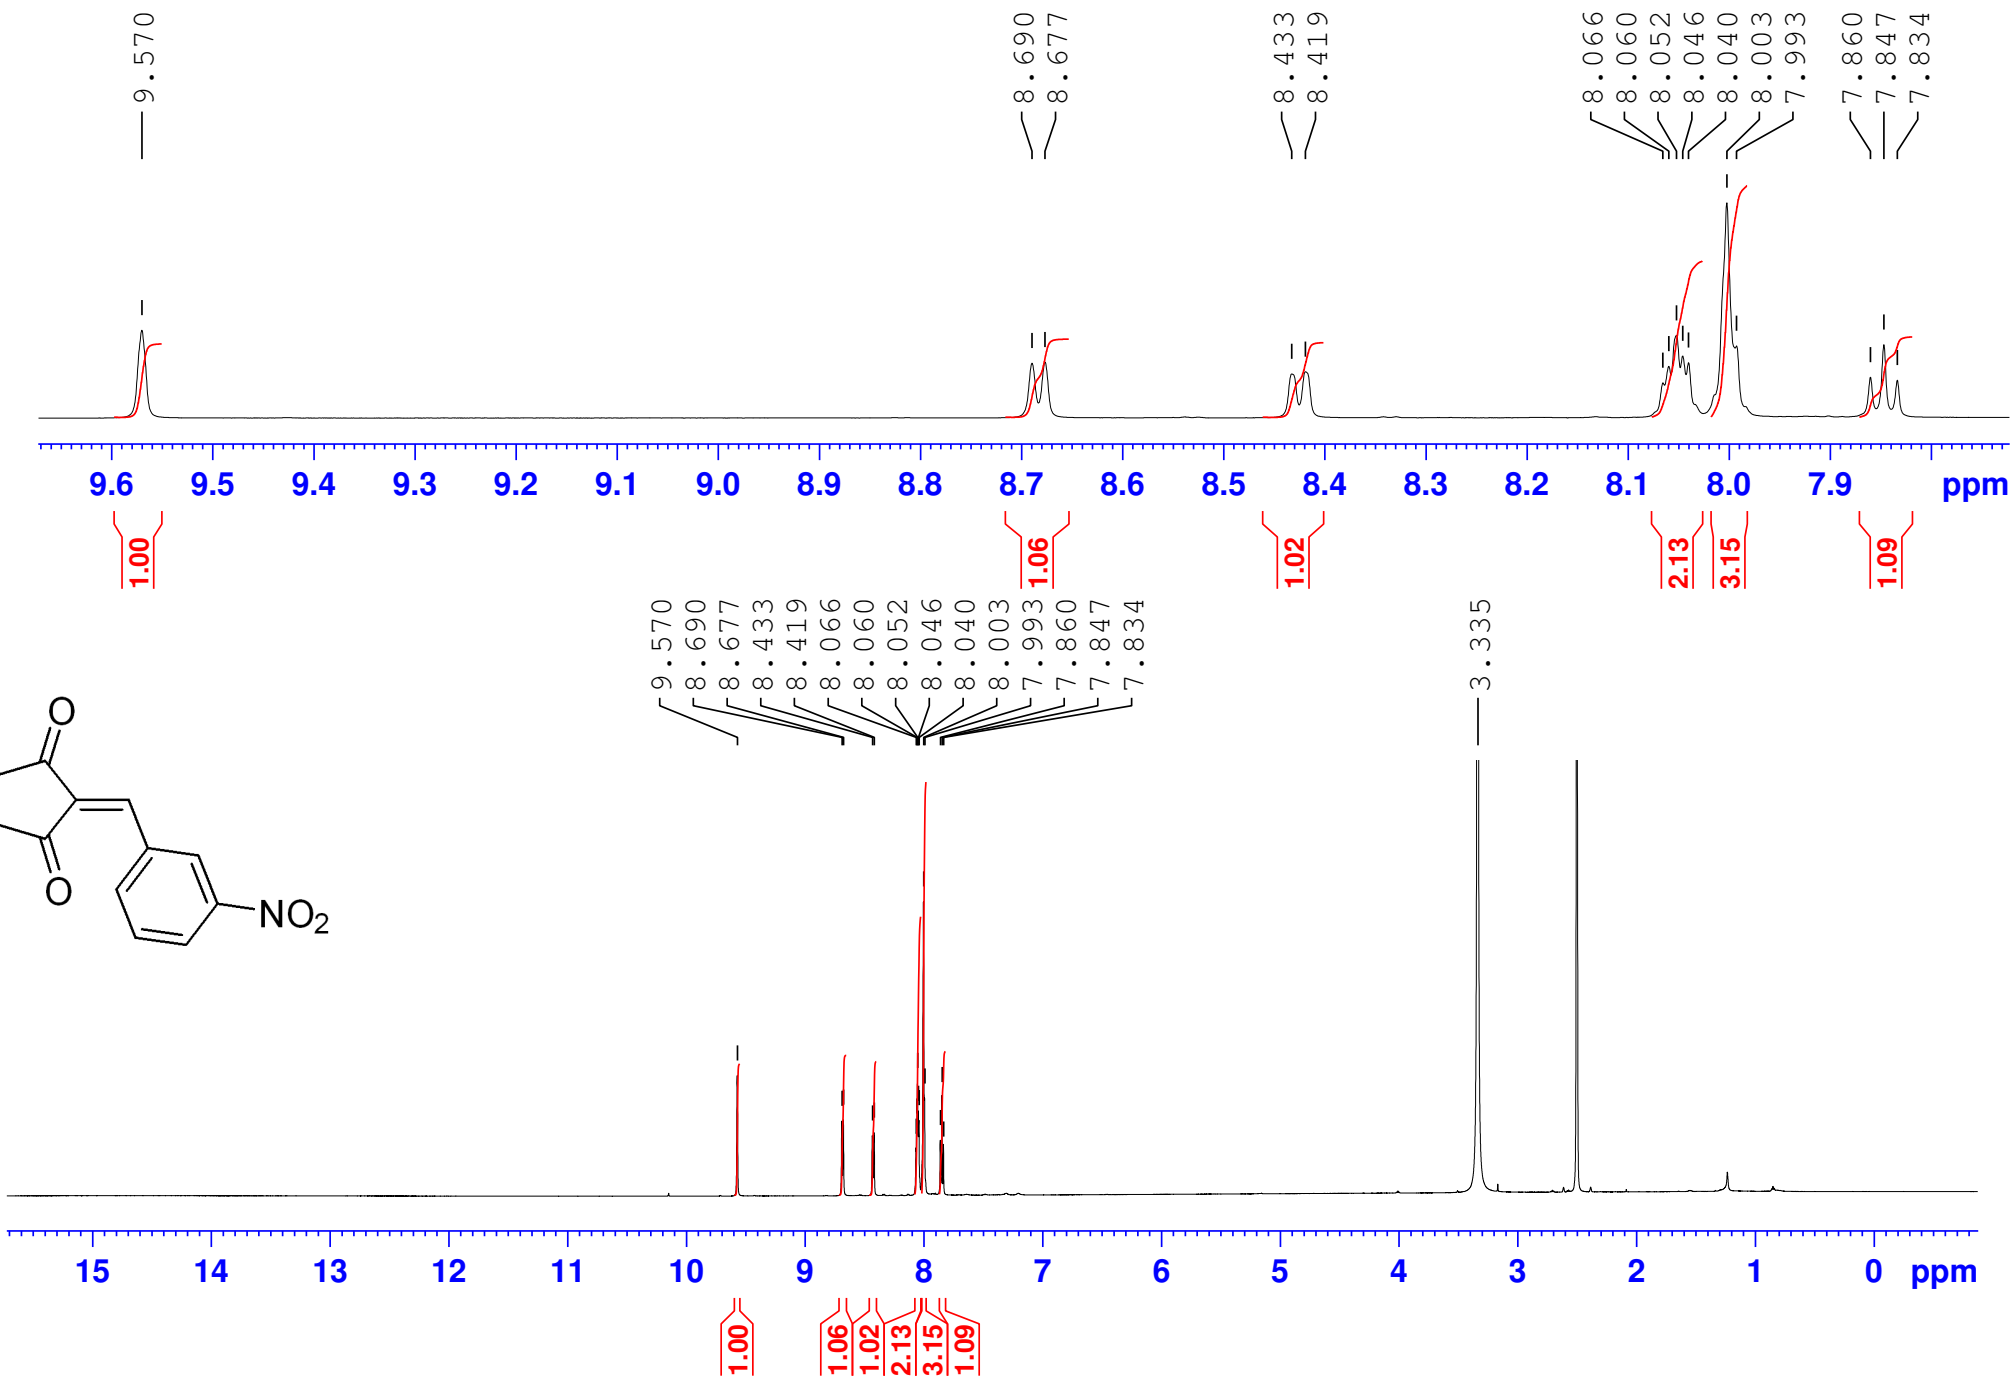

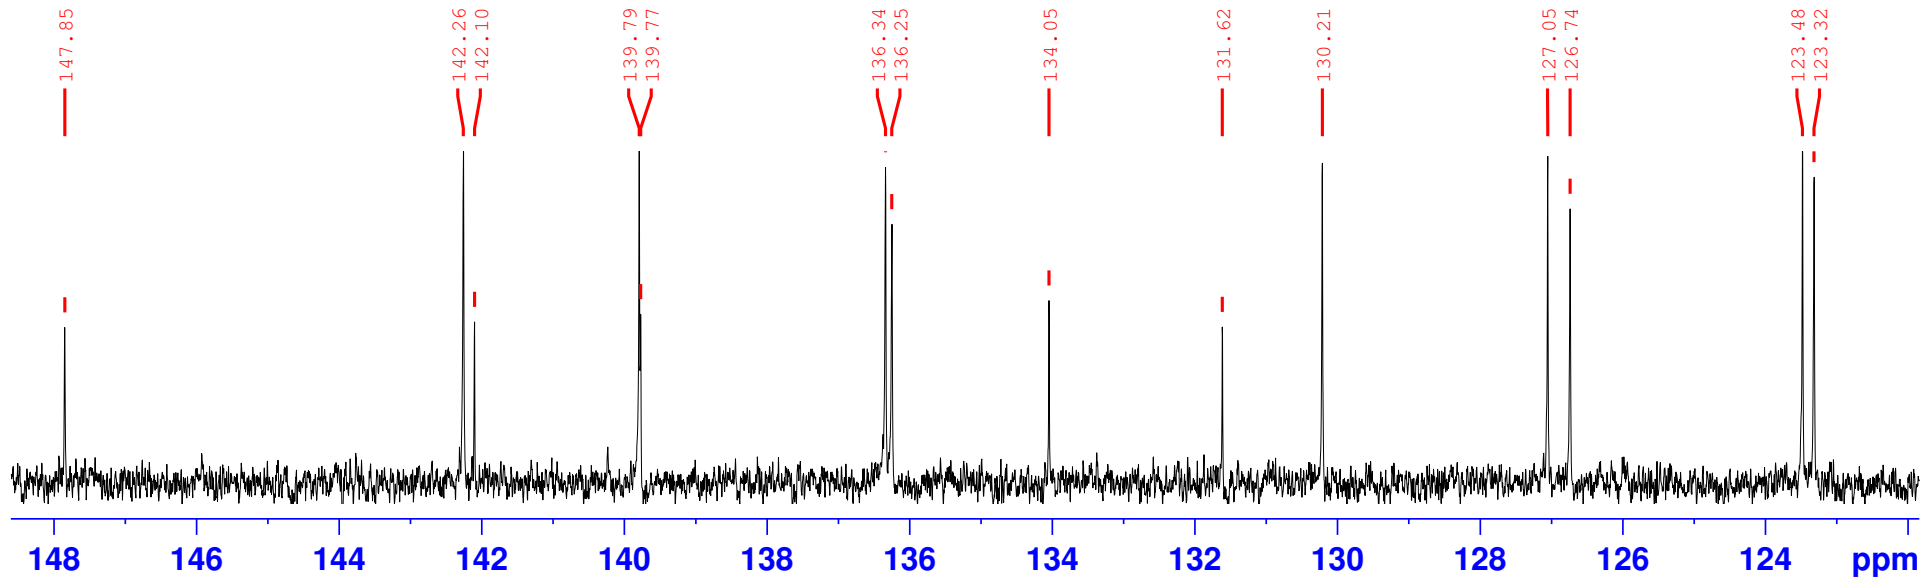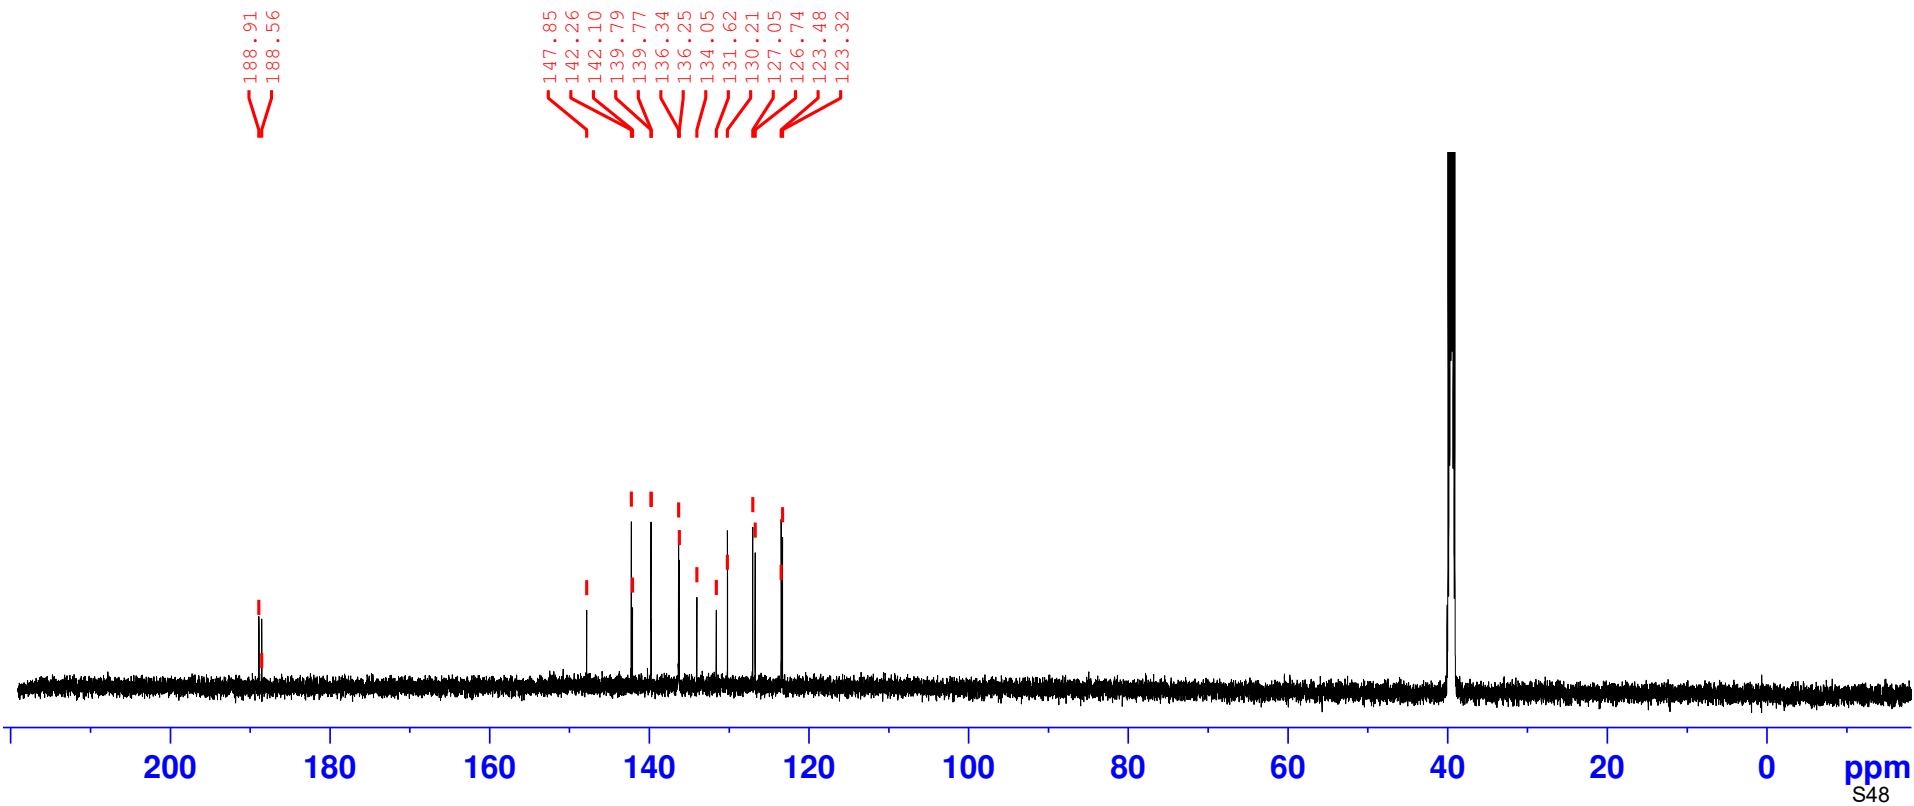



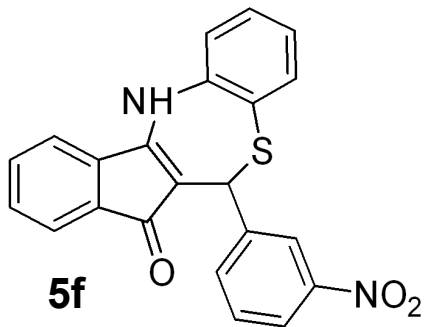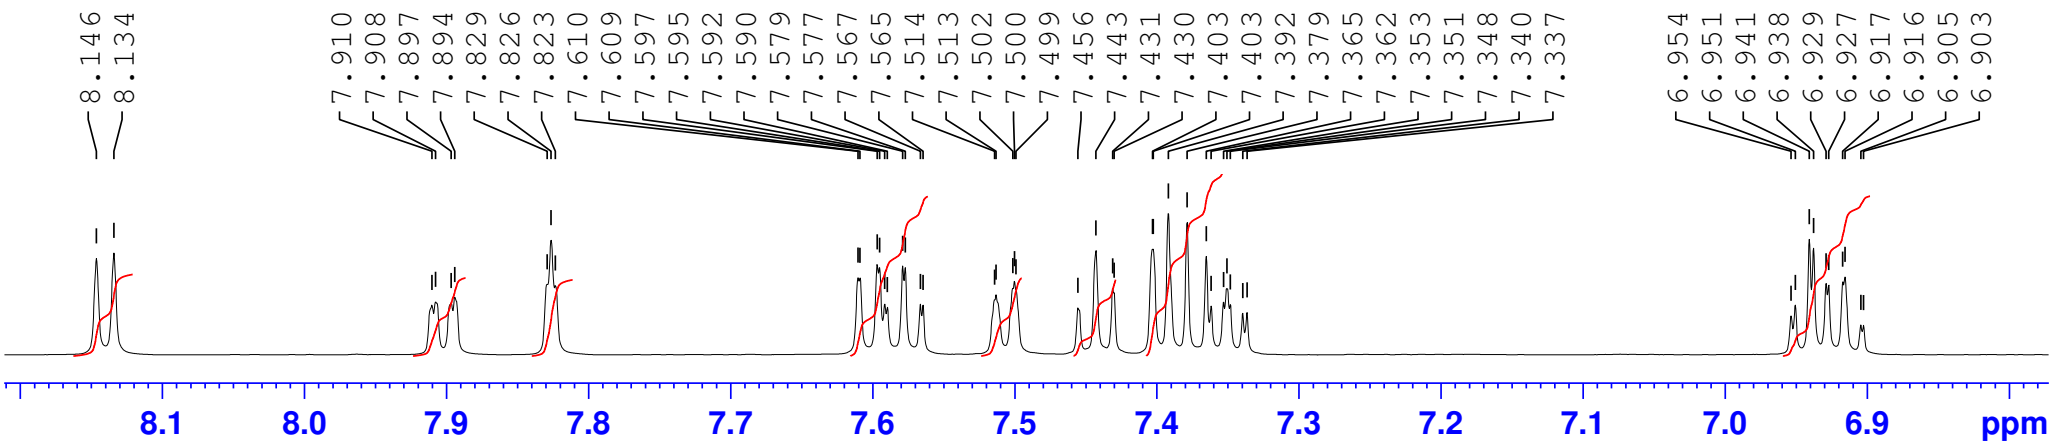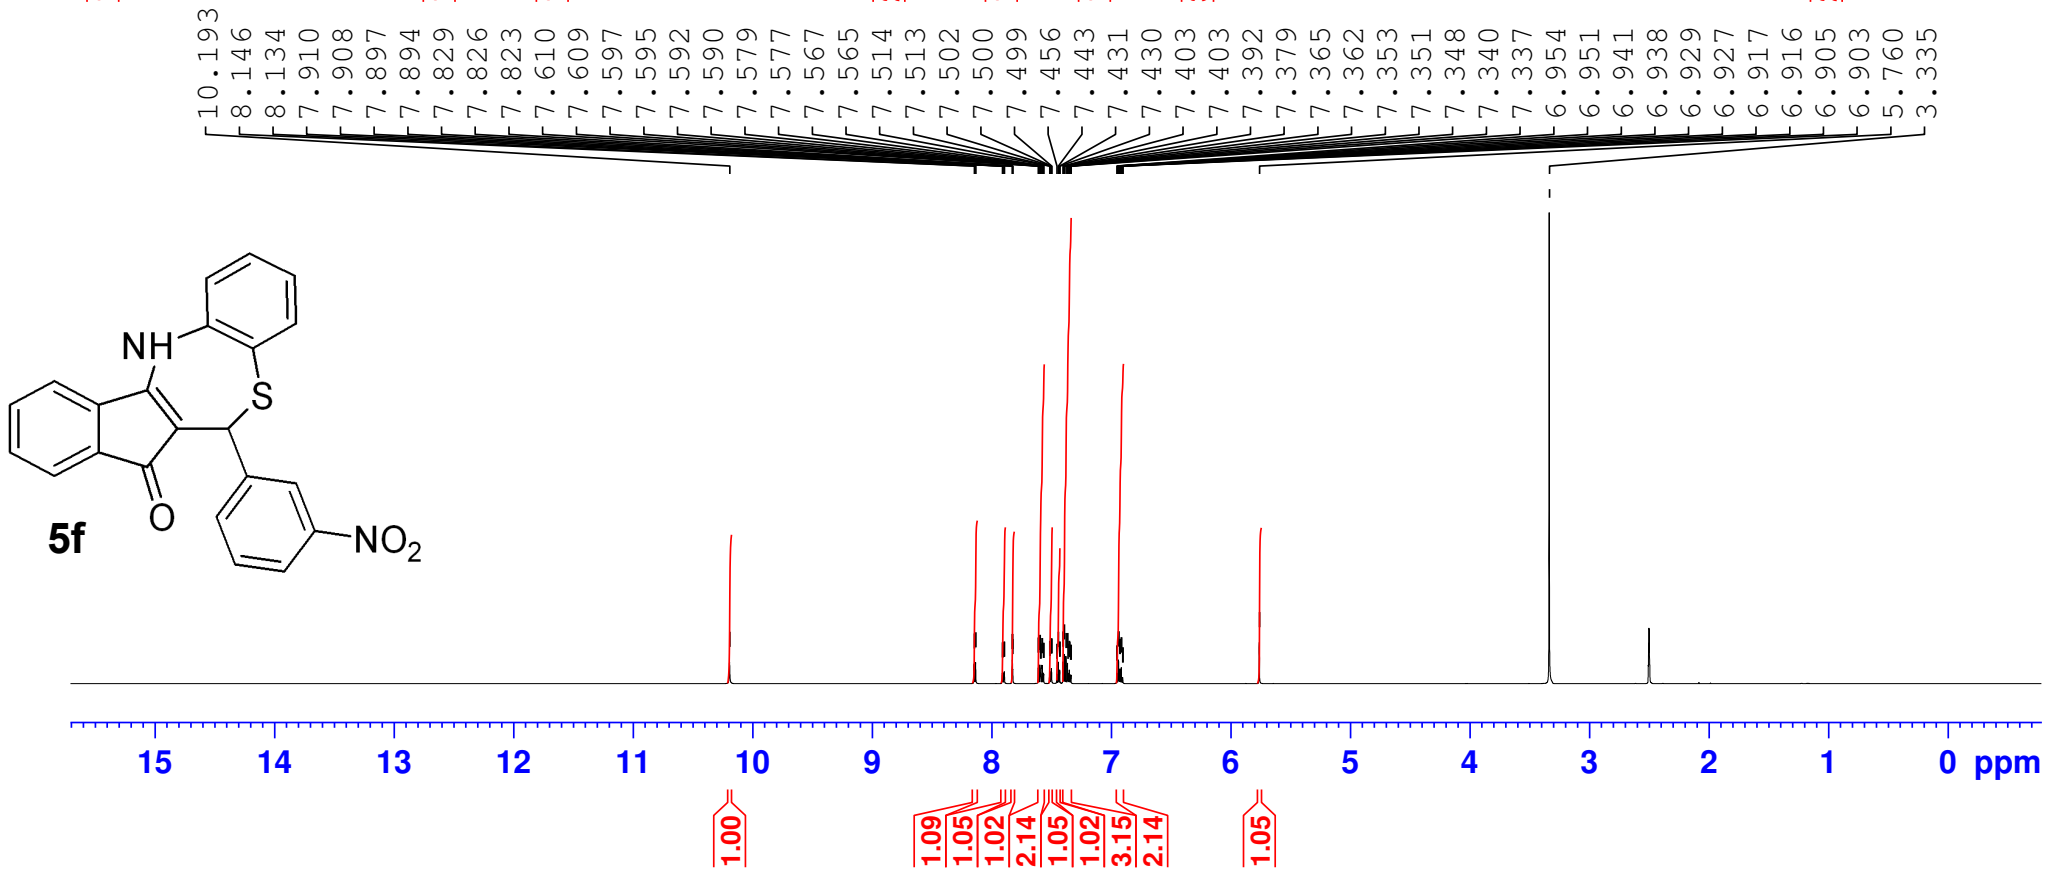

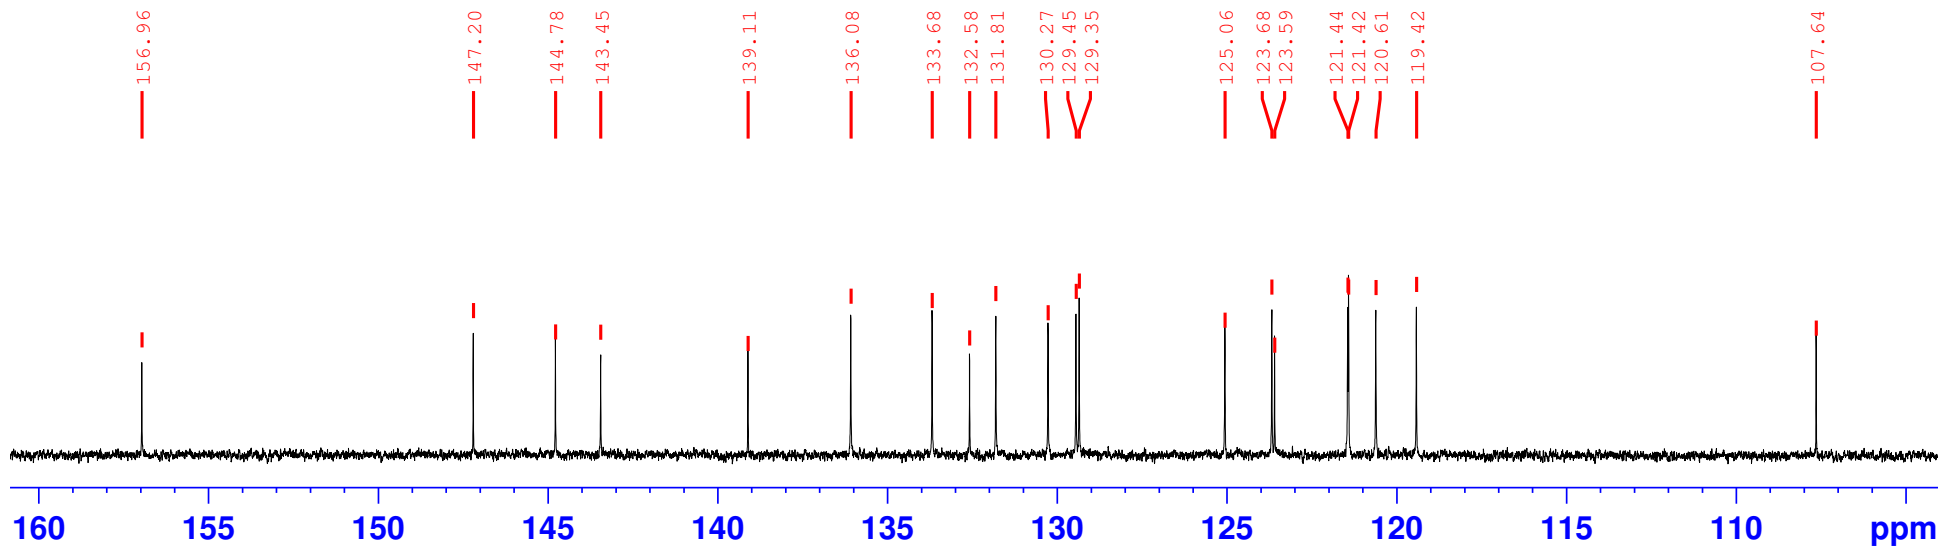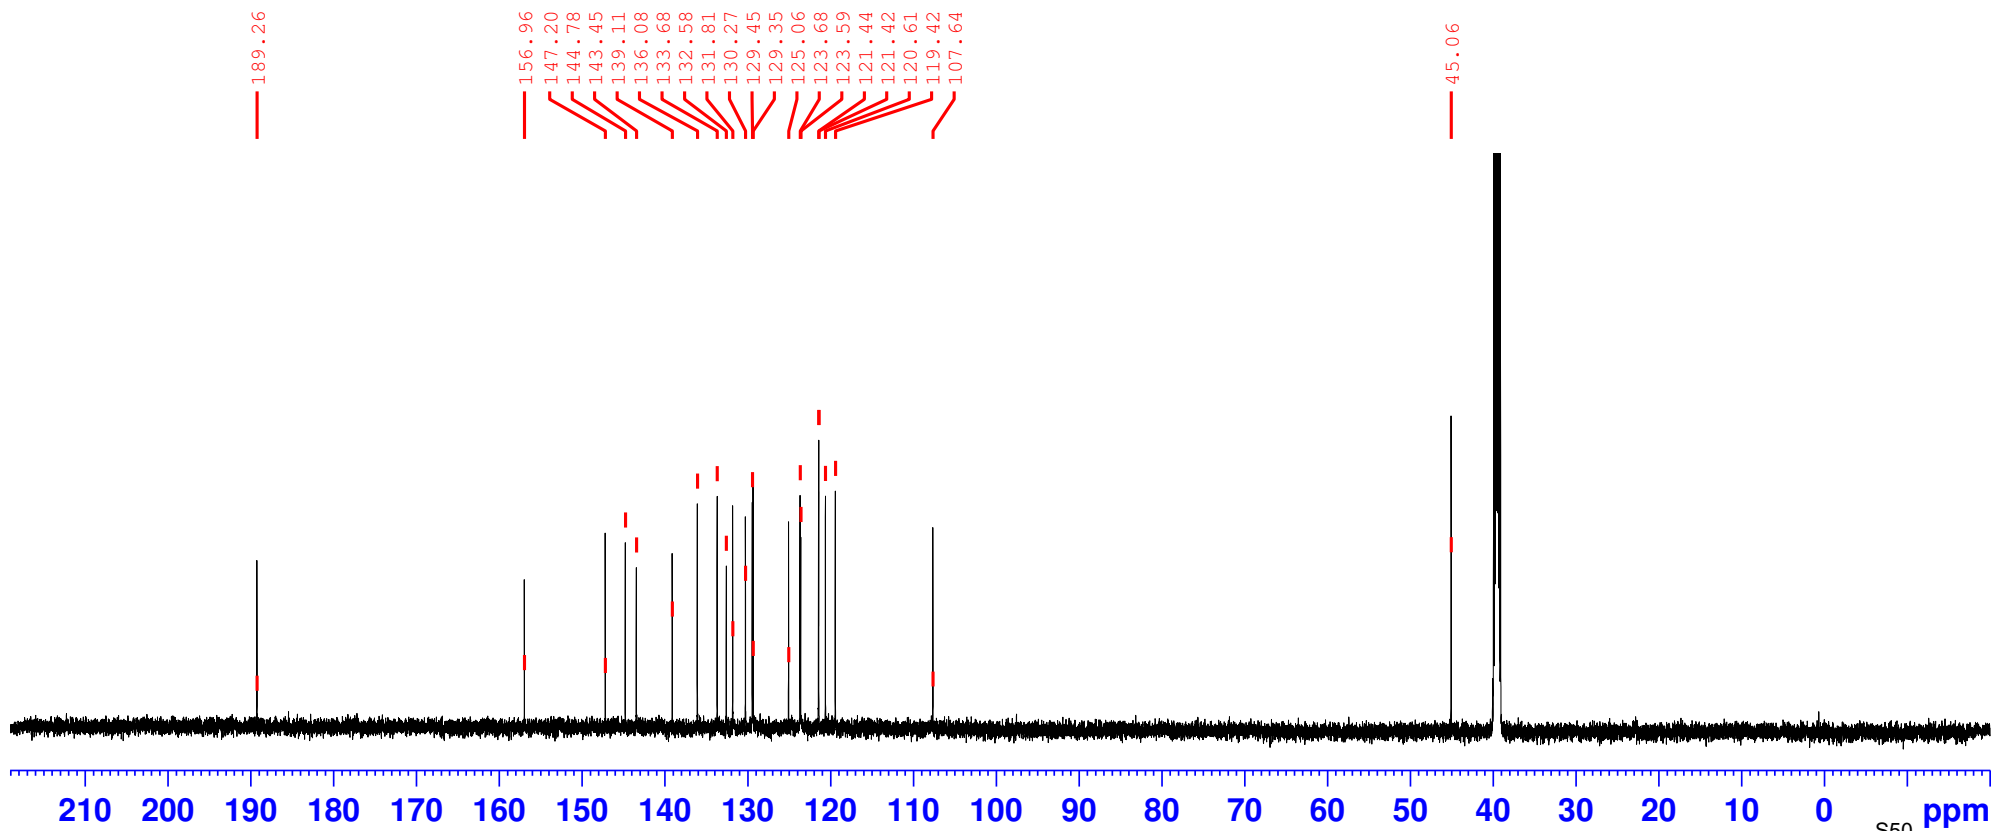

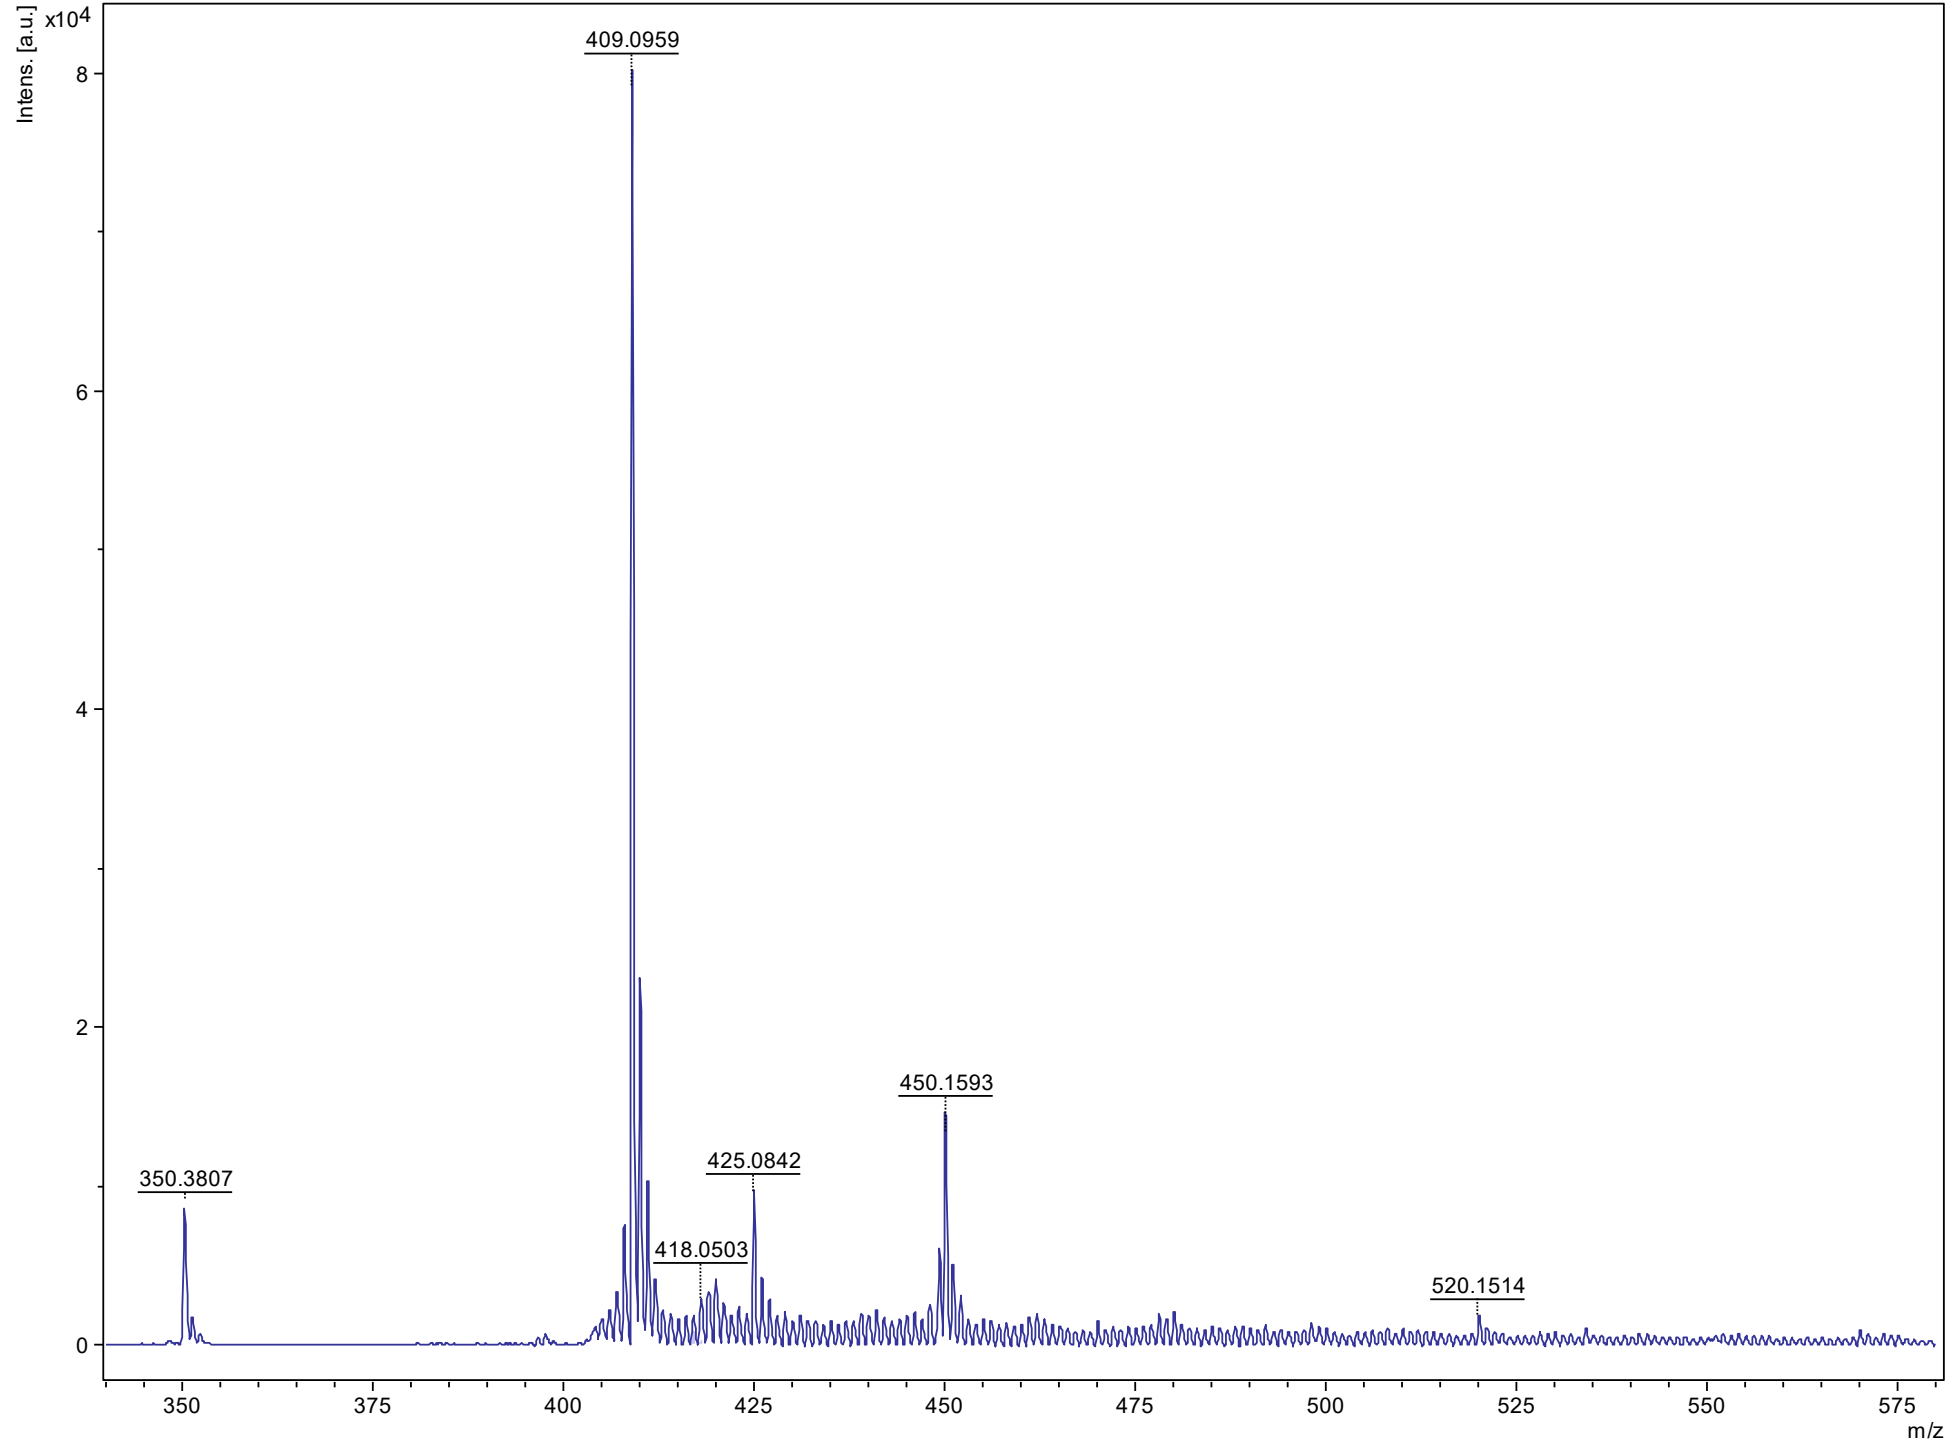

Sample Name: MAS 3-62

```

=====
Acq. Operator   : SYSTEM                               Seq. Line :    5
Acq. Instrument : 1220 HPLC                             Location  :   65
Injection Date  : 9/1/2021 4:13:08 PM                  Inj       :    1
                                                    Inj Volume: 50.000 µl

Acq. Method     : C:\Chem32\1\Data\luana 2021-09-01 14-40-37\Luana_small_molecule.M
Last changed    : 9/1/2021 3:22:09 PM by SYSTEM
Analysis Method : C:\Chem32\1\Data\luana 2021-09-01 14-40-37\Luana_small_molecule.M (Sequence
Method)
Last changed    : 9/1/2021 3:44:43 PM by SYSTEM
Method Info     : MeOH/water

Sample Info     : MAS 3-62
    
```

Additional Info : Peak(s) manually integrated

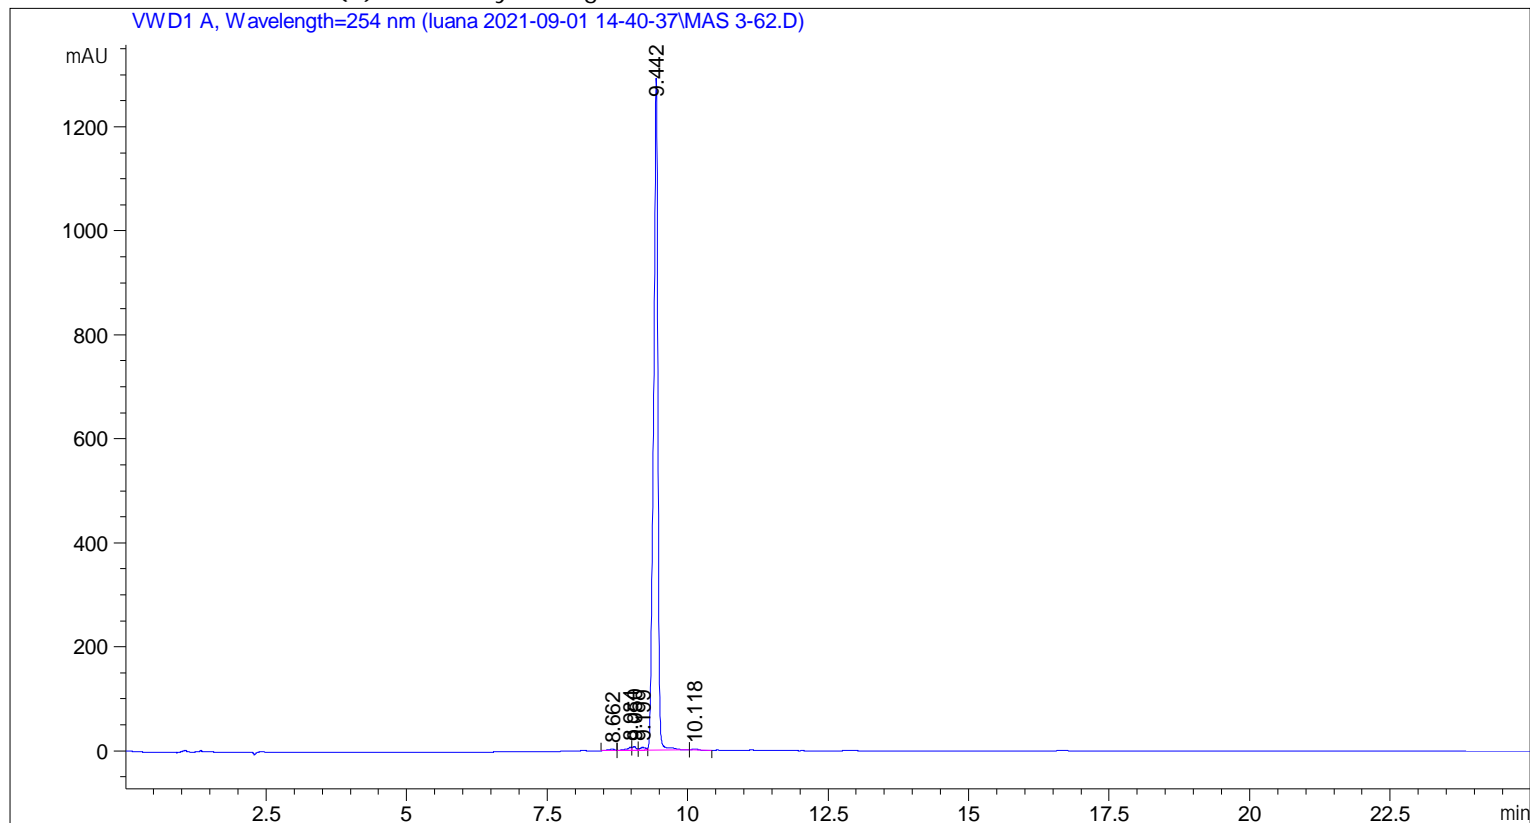

Area Percent Report

```

=====
Sorted By      :      Signal
Multiplier     :      1.0000
Dilution      :      1.0000
Use Multiplier & Dilution Factor with ISTDs
    
```

Signal 1: VWD1 A, Wavelength=254 nm

| Peak # | RetTime [min] | Type | Width [min] | Area [mAU*s] | Height [mAU] | Area % |
|--------|---------------|------|-------------|--------------|--------------|--------|
| 1      | 8.662         | BB   | 0.1041      | 18.26989     | 2.47541      | 0.2613 |
| 2      | 8.984         | BV E | 0.0787      | 29.72317     | 5.27424      | 0.4251 |
| 3      | 9.050         | VV E | 0.0683      | 32.02338     | 6.75701      | 0.4580 |

| Peak # | RetTime [min] | Type | Width [min] | Area [mAU*s] | Height [mAU] | Area %  |
|--------|---------------|------|-------------|--------------|--------------|---------|
| 4      | 9.199         | VV E | 0.0972      | 37.04636     | 5.19777      | 0.5298  |
| 5      | 9.442         | VV R | 0.0759      | 6861.21191   | 1293.59338   | 98.1269 |
| 6      | 10.118        | BV R | 0.0976      | 13.91127     | 1.99002      | 0.1990  |

Totals :                           6992.18599 1315.28784

=====  
\*\*\* End of Report \*\*\*

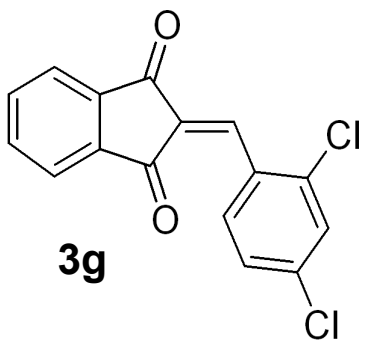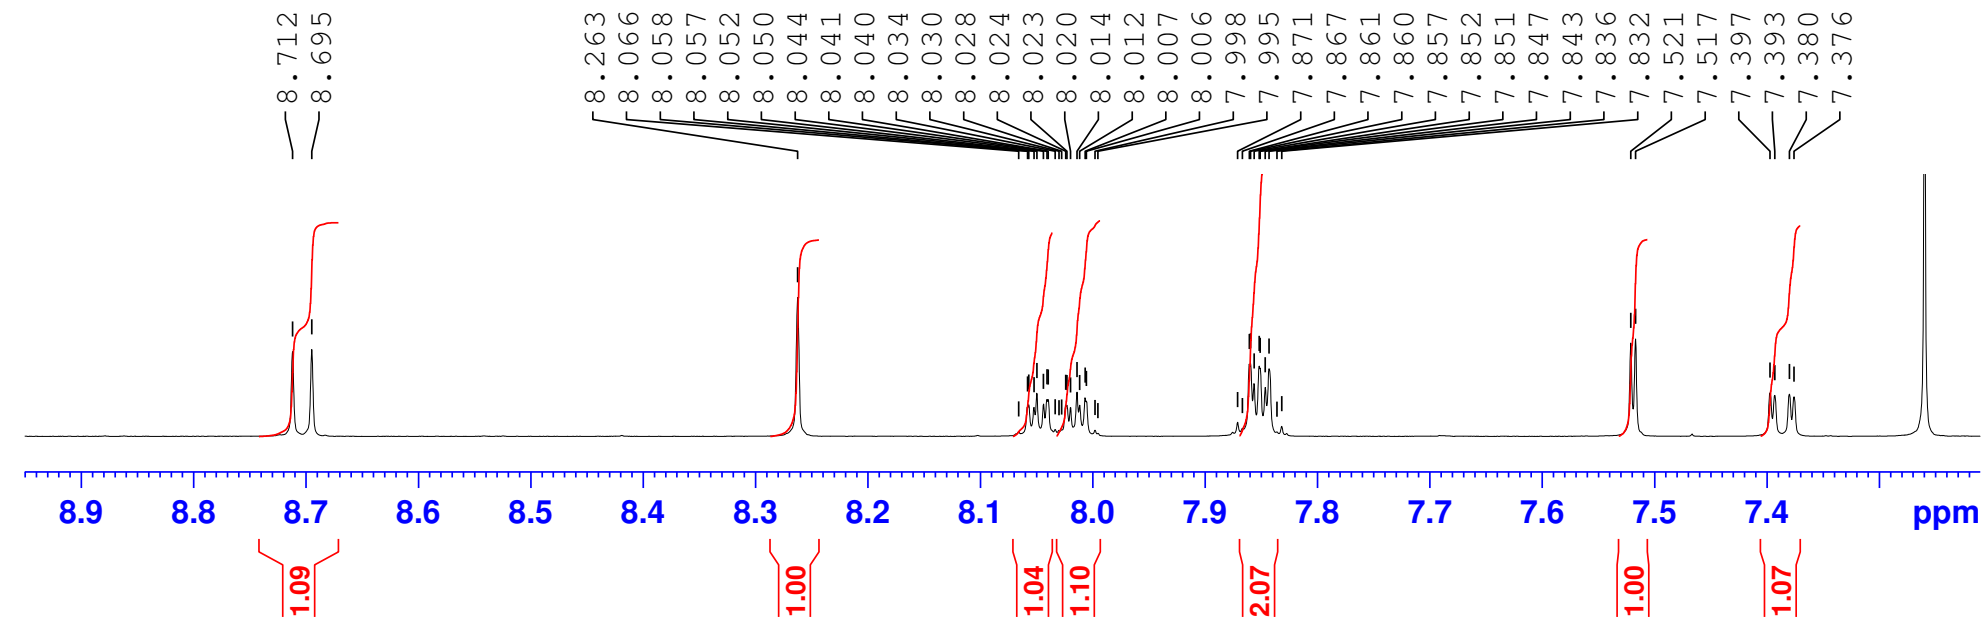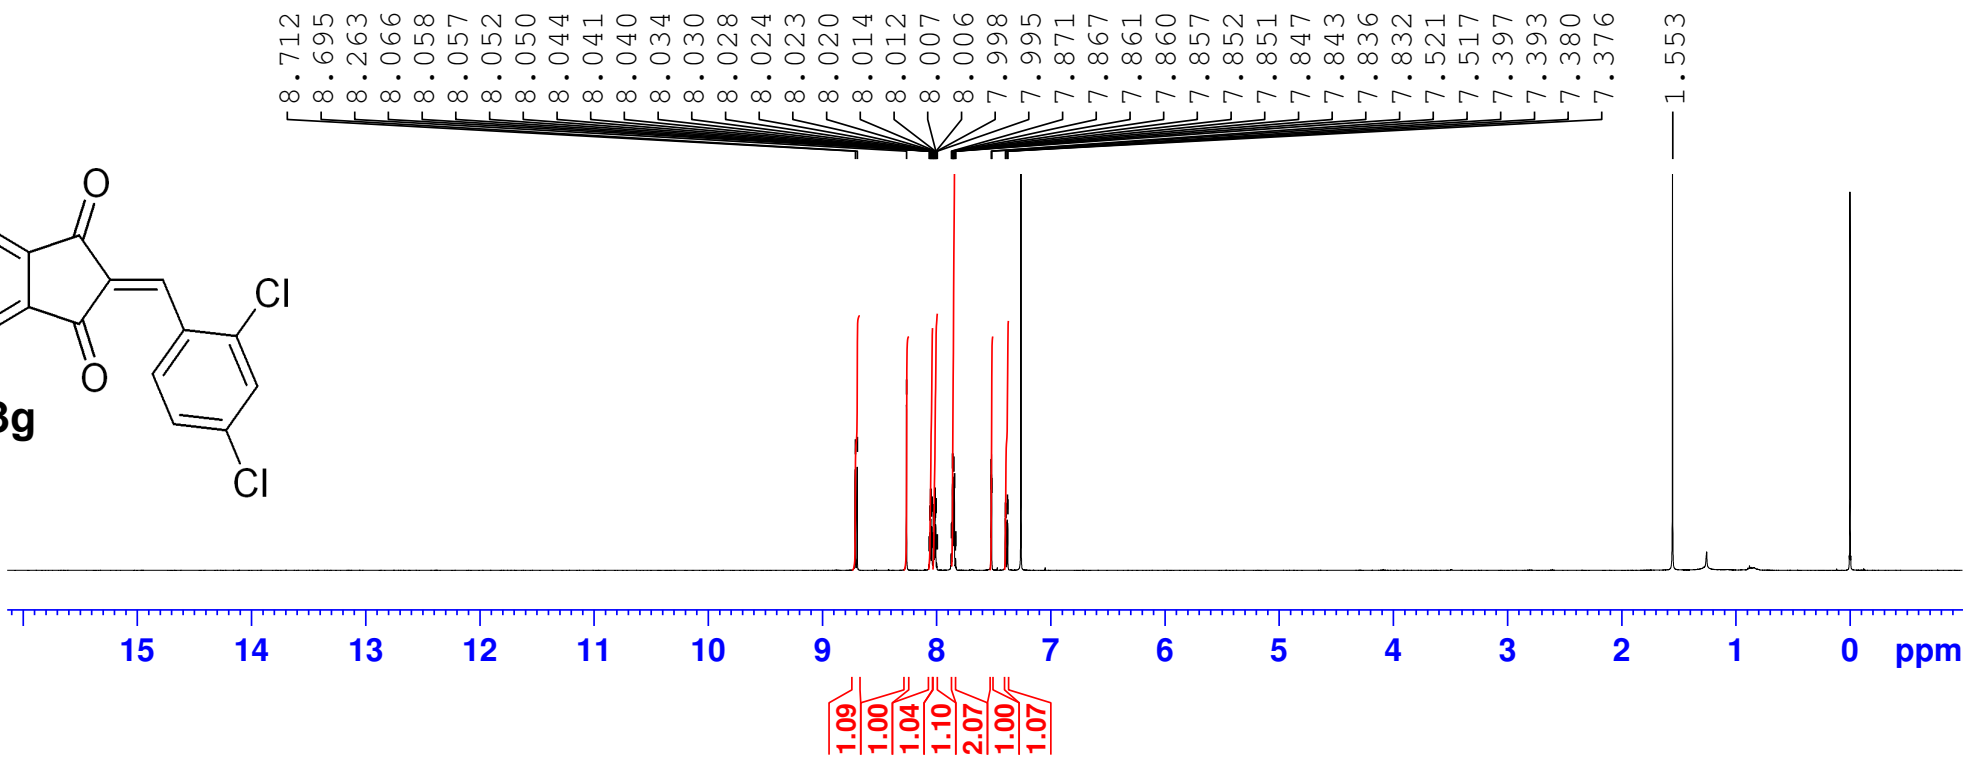

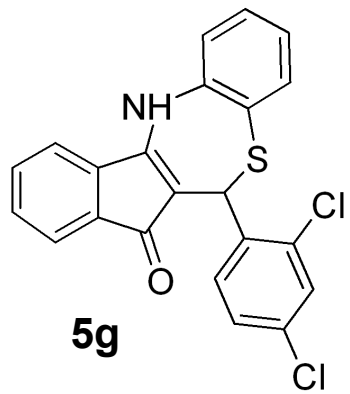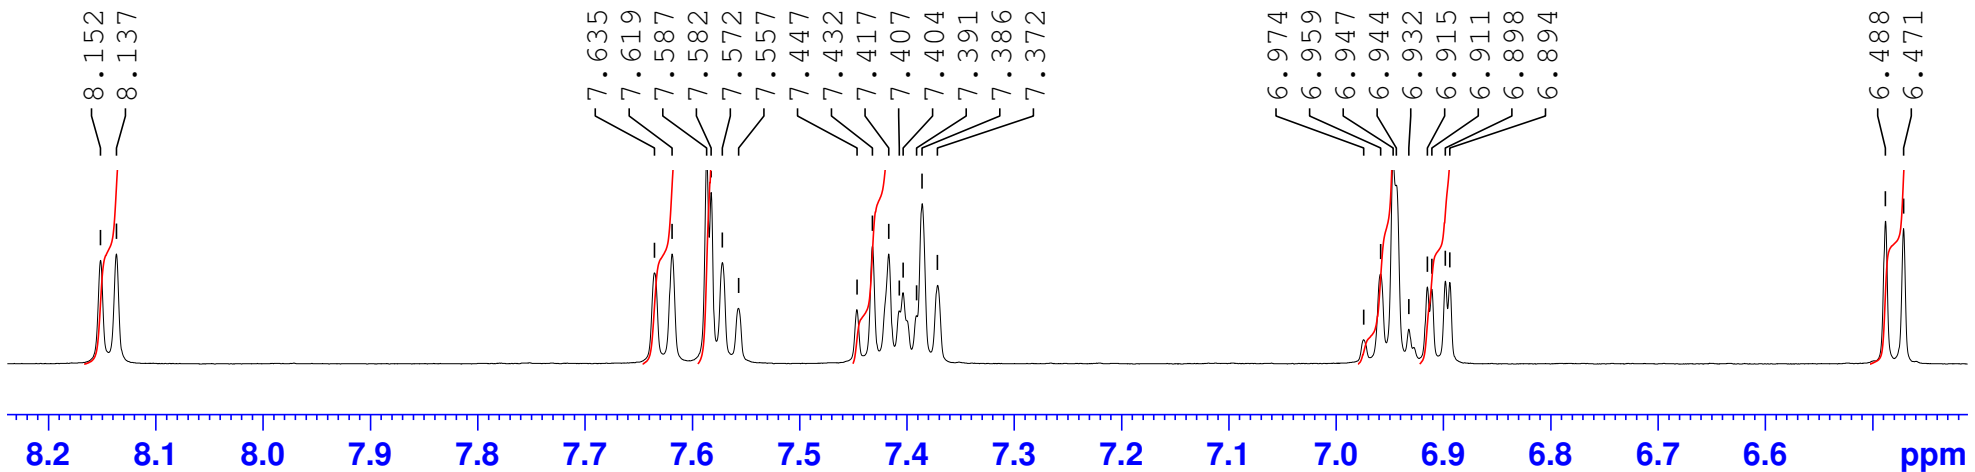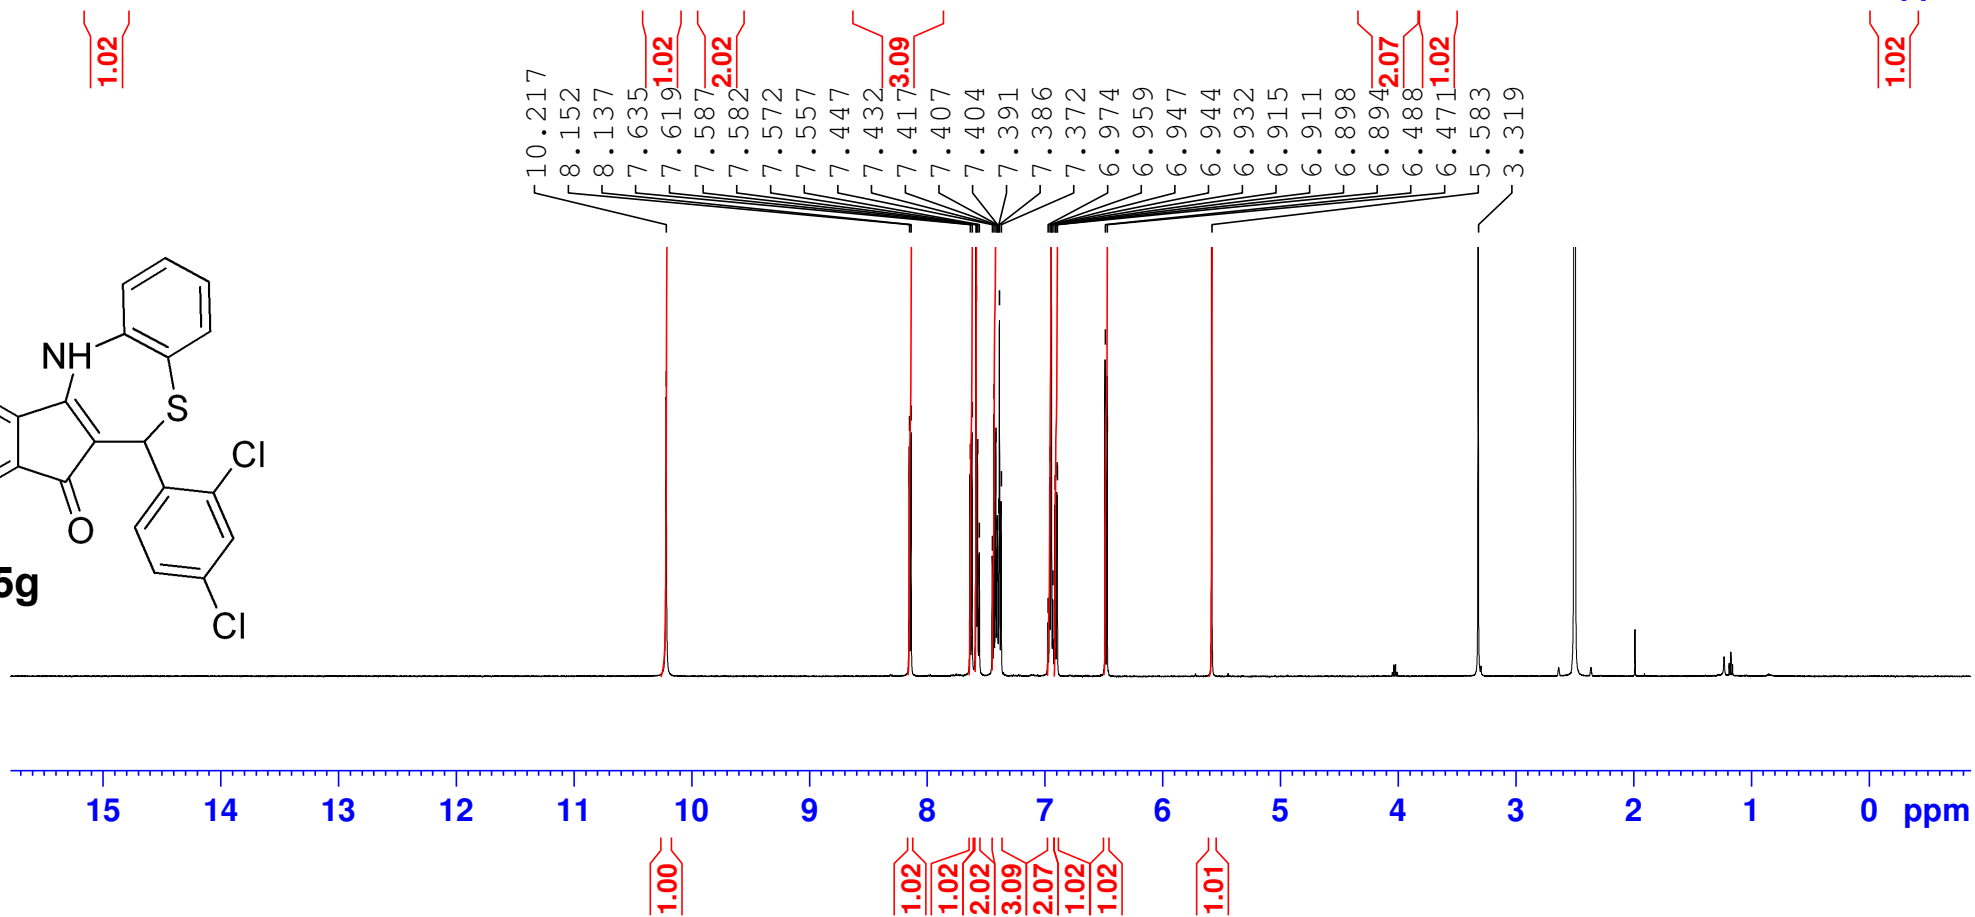

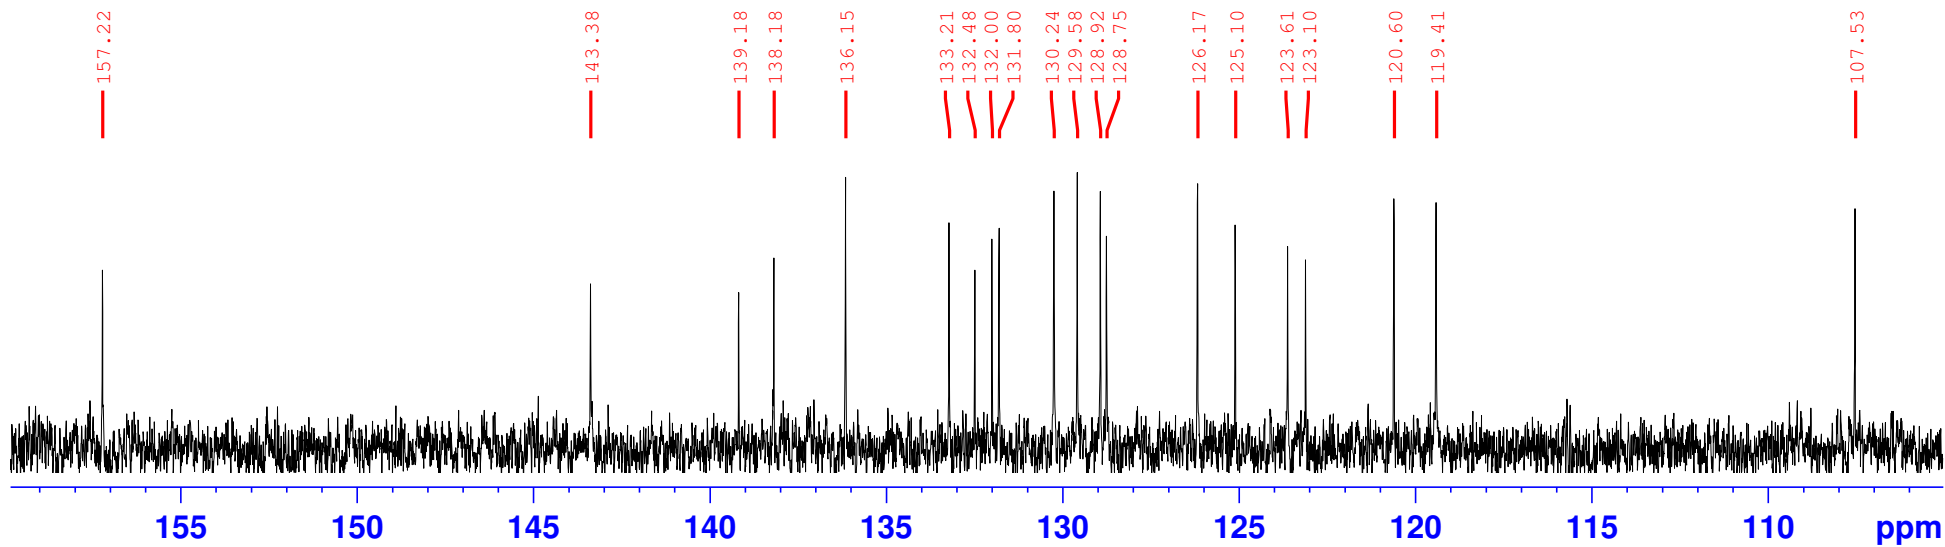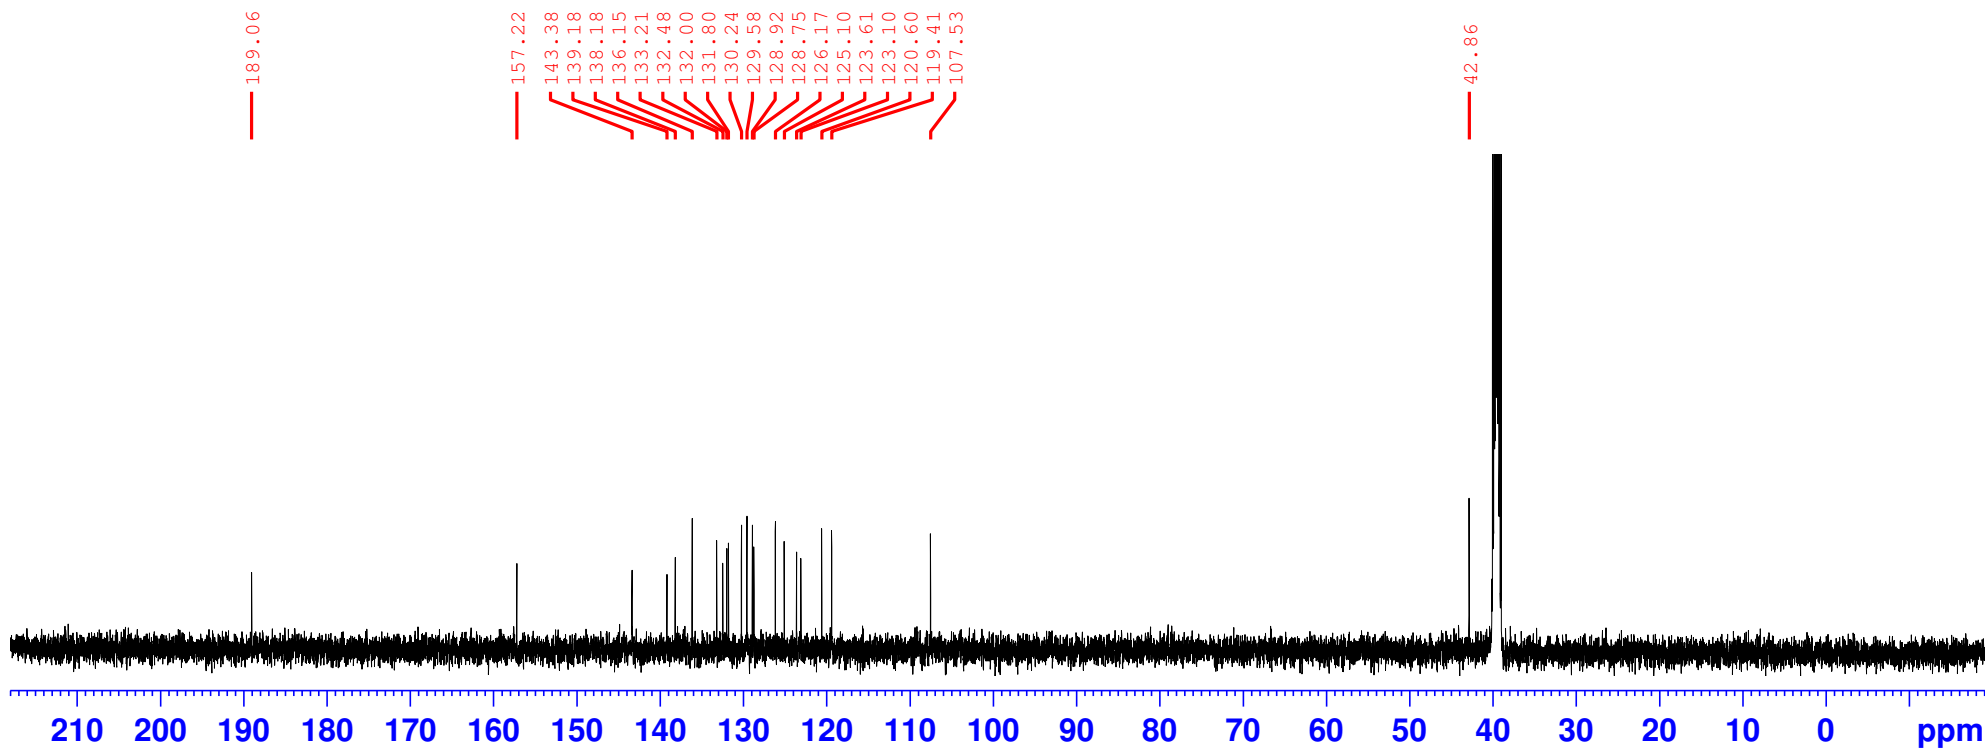



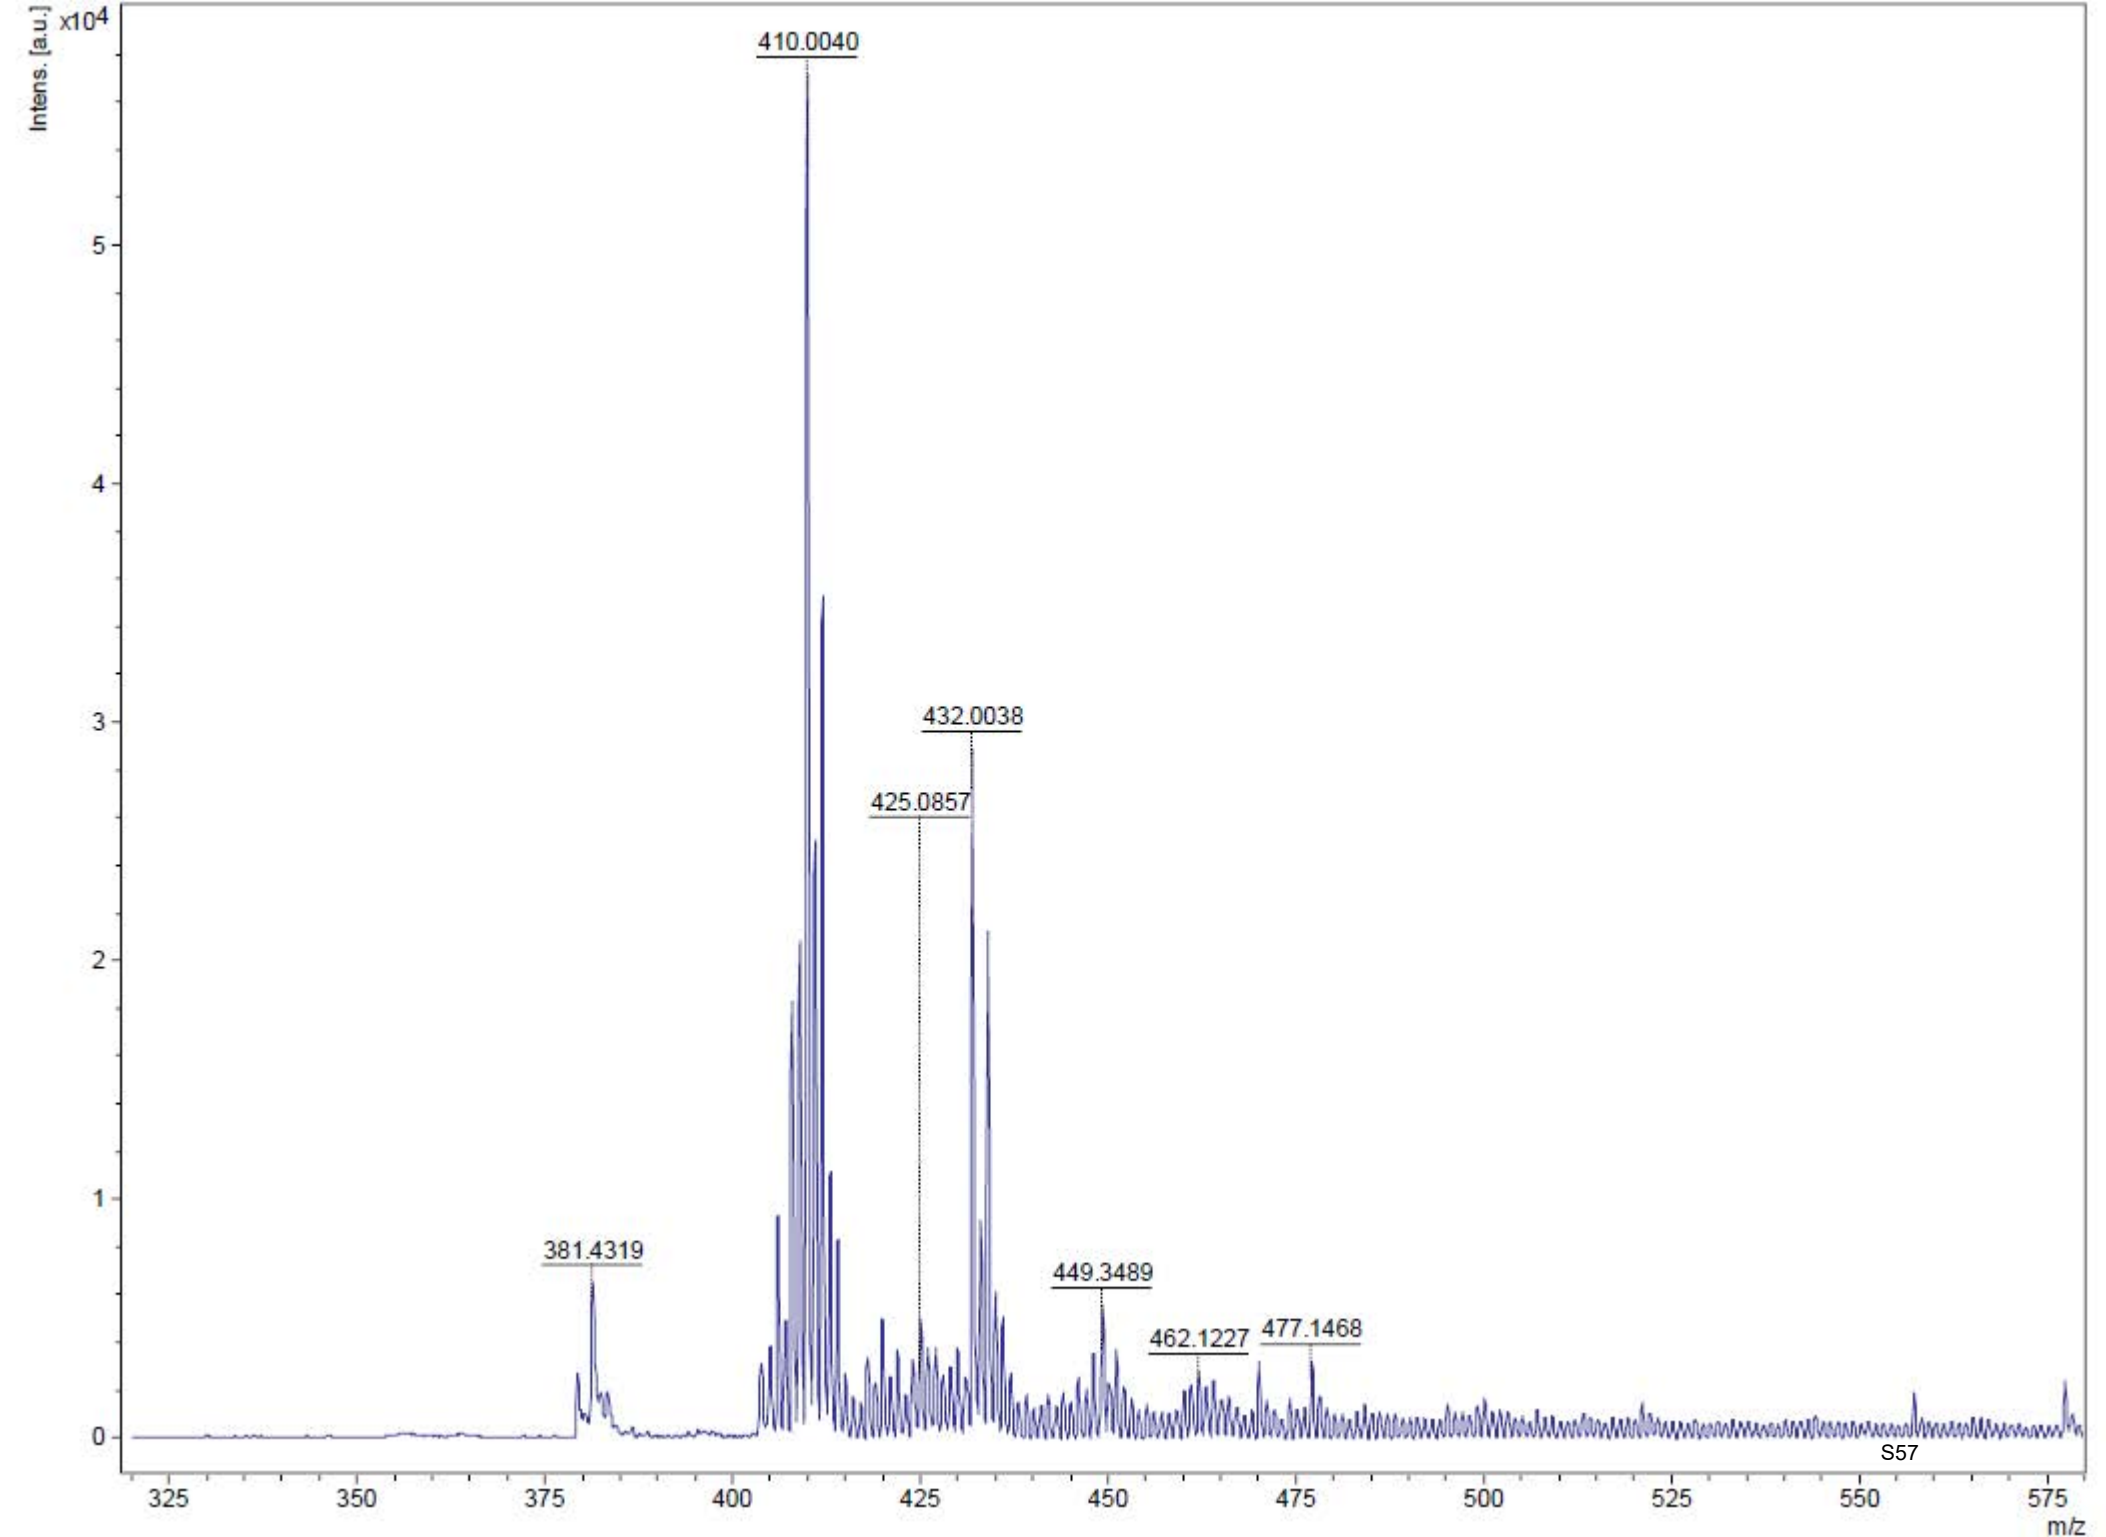

```

=====
Acq. Operator   : SYSTEM                      Seq. Line :    4
Sample Operator : SYSTEM
Acq. Instrument : 1260Infinite2              Location  : P1-C-02
Injection Date  : 3/23/2020 3:24:33 PM       Inj       :    1
                                                Inj Volume: 50.000 µl
Method          : C:\Users\Public\Documents\ChemStation\1\Data\Huihua-MC 2020-03-23 14-13-54
                 \MC-SMALL MOLE.M (Sequence Method)
Last changed    : 2/19/2020 11:54:04 AM by SYSTEM
  
```

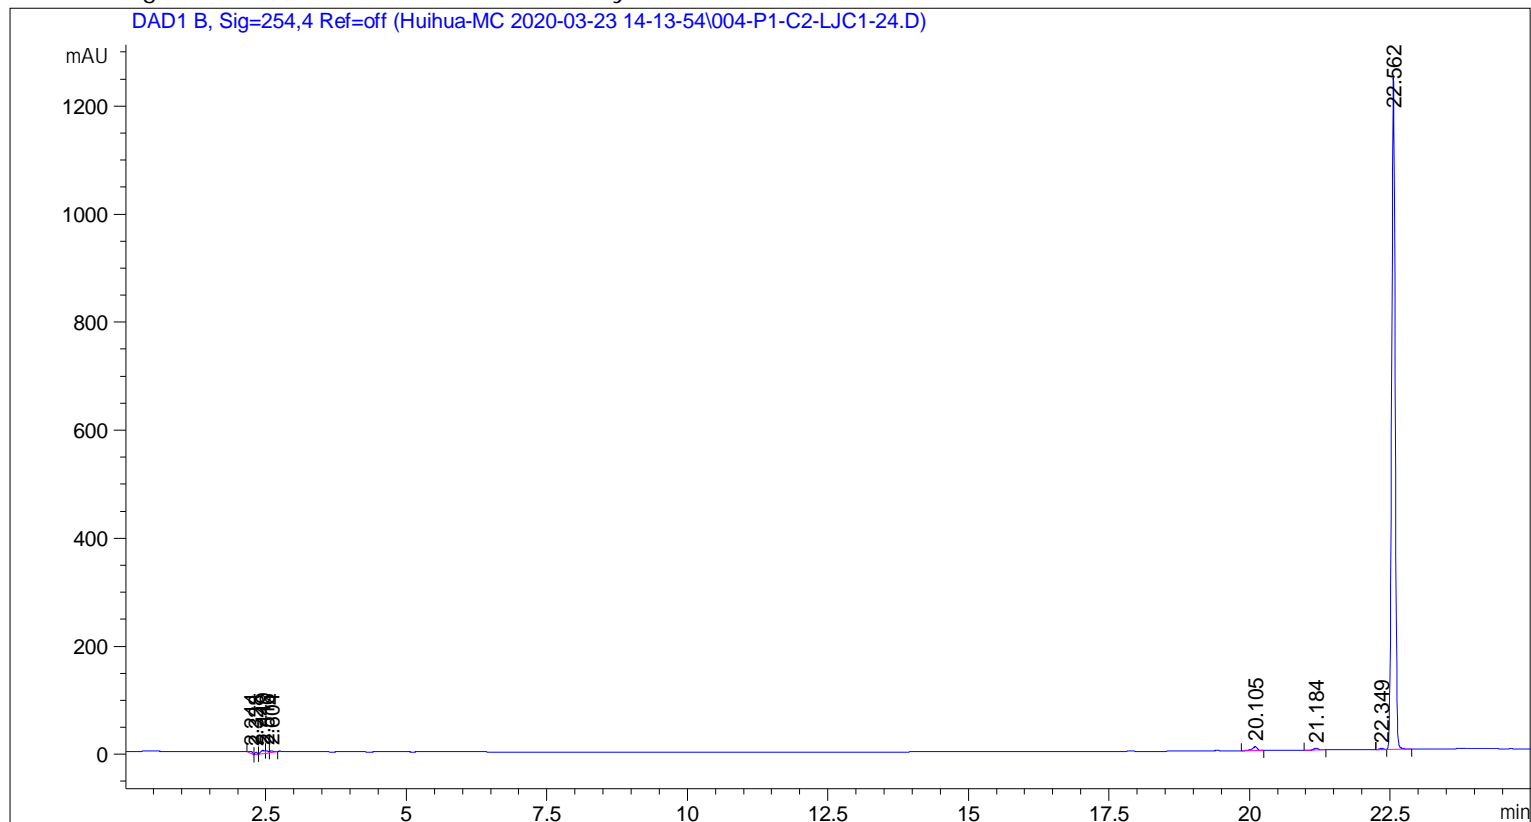

=====  
 Area Percent Report  
 =====

```

Sorted By      : Signal
Multiplier     : 1.0000
Dilution       : 1.0000
Use Multiplier & Dilution Factor with ISTDs
  
```

Signal 1: DAD1 B, Sig=254, 4 Ref=off

| Peak # | RetTime [min] | Type | Width [min] | Area [mAU*s] | Height [mAU] | Area %  |
|--------|---------------|------|-------------|--------------|--------------|---------|
| 1      | 2.244         | BB   | 0.0527      | 14.43443     | 3.76618      | 0.2594  |
| 2      | 2.328         | BB   | 0.0438      | 11.32773     | 4.42787      | 0.2035  |
| 3      | 2.449         | BV   | 0.0799      | 31.01915     | 6.25525      | 0.5573  |
| 4      | 2.516         | VV   | 0.0532      | 14.17586     | 4.01256      | 0.2547  |
| 5      | 2.604         | VB   | 0.0739      | 16.91662     | 3.19085      | 0.3040  |
| 6      | 20.105        | BB   | 0.0936      | 46.56497     | 7.18940      | 0.8367  |
| 7      | 21.184        | BB   | 0.0878      | 21.39718     | 3.68343      | 0.3845  |
| 8      | 22.349        | BV E | 0.0736      | 10.60570     | 2.22393      | 0.1906  |
| 9      | 22.562        | VB R | 0.0665      | 5399.10205   | 1247.41296   | 97.0094 |

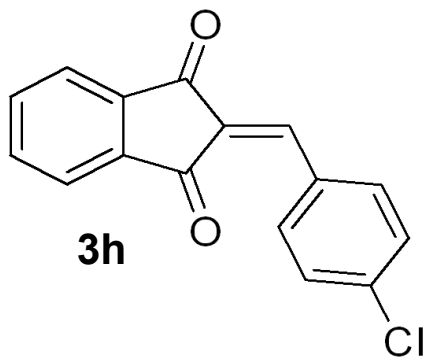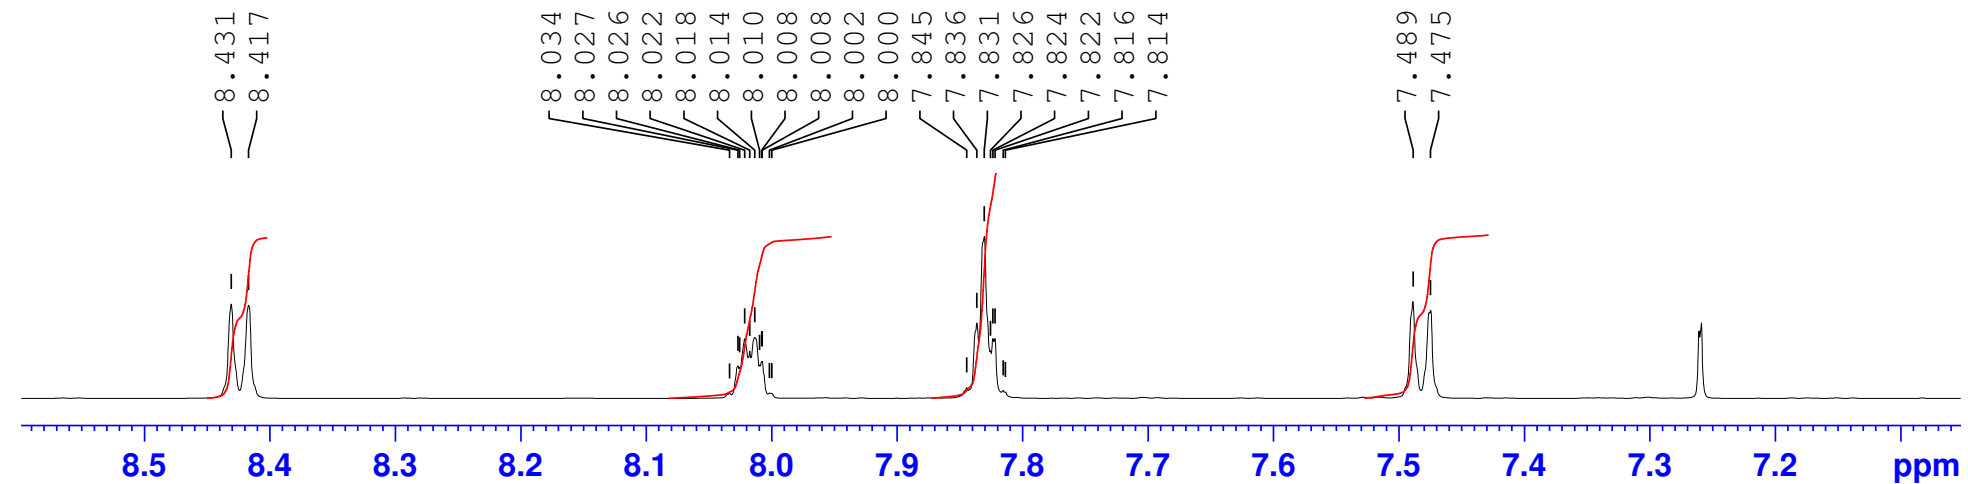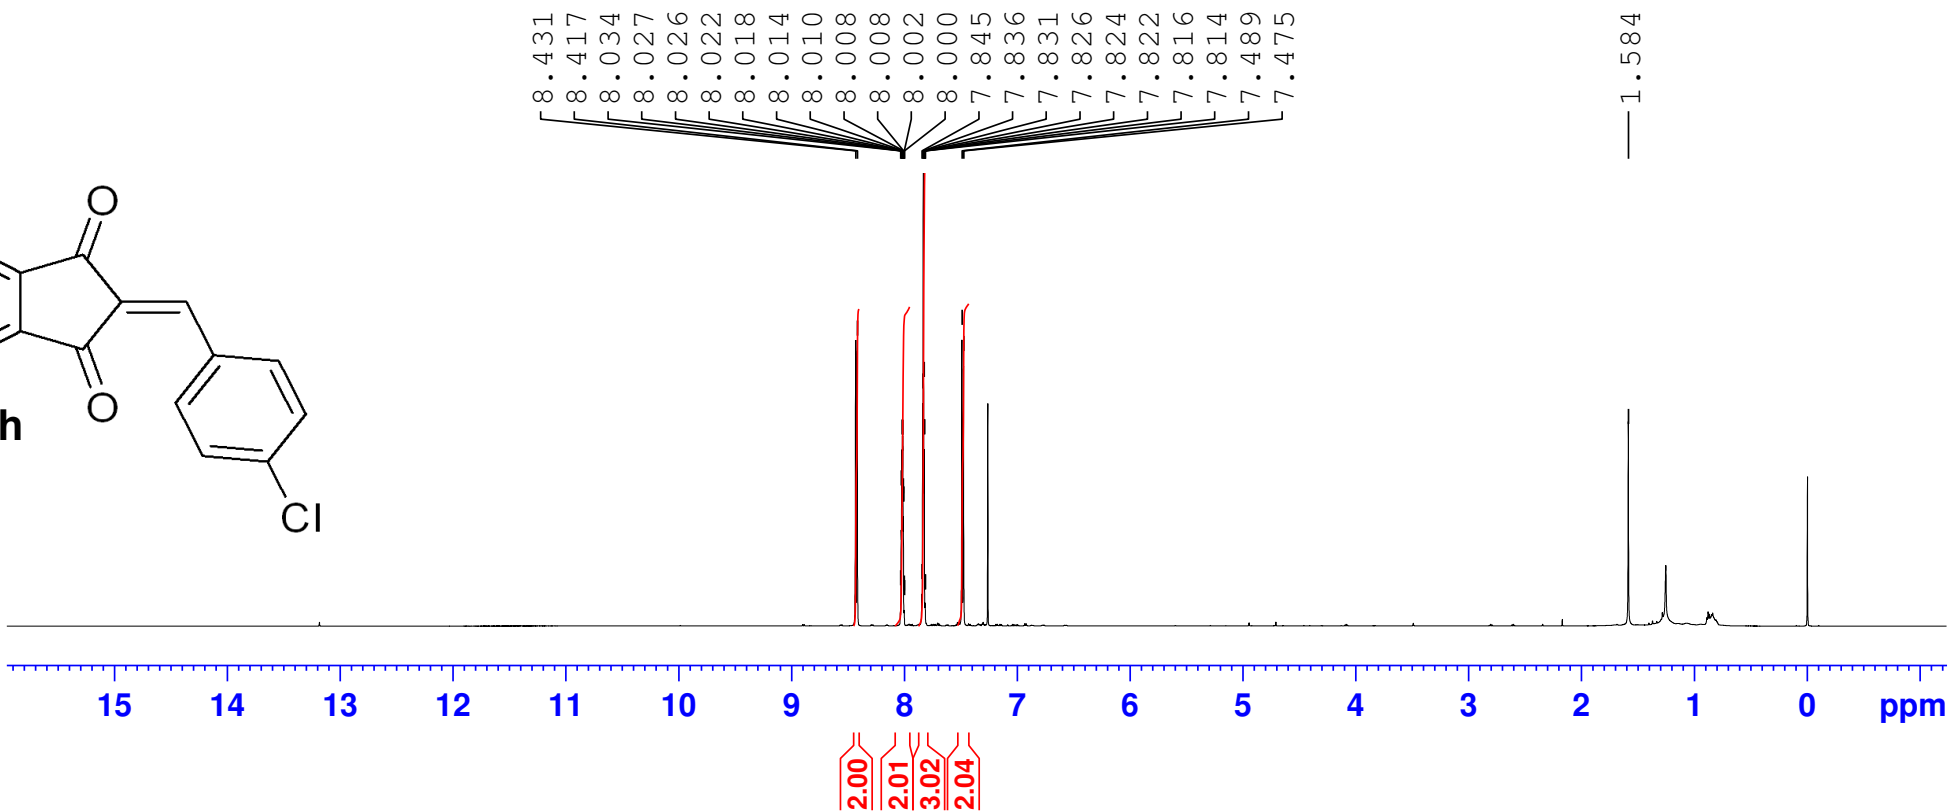

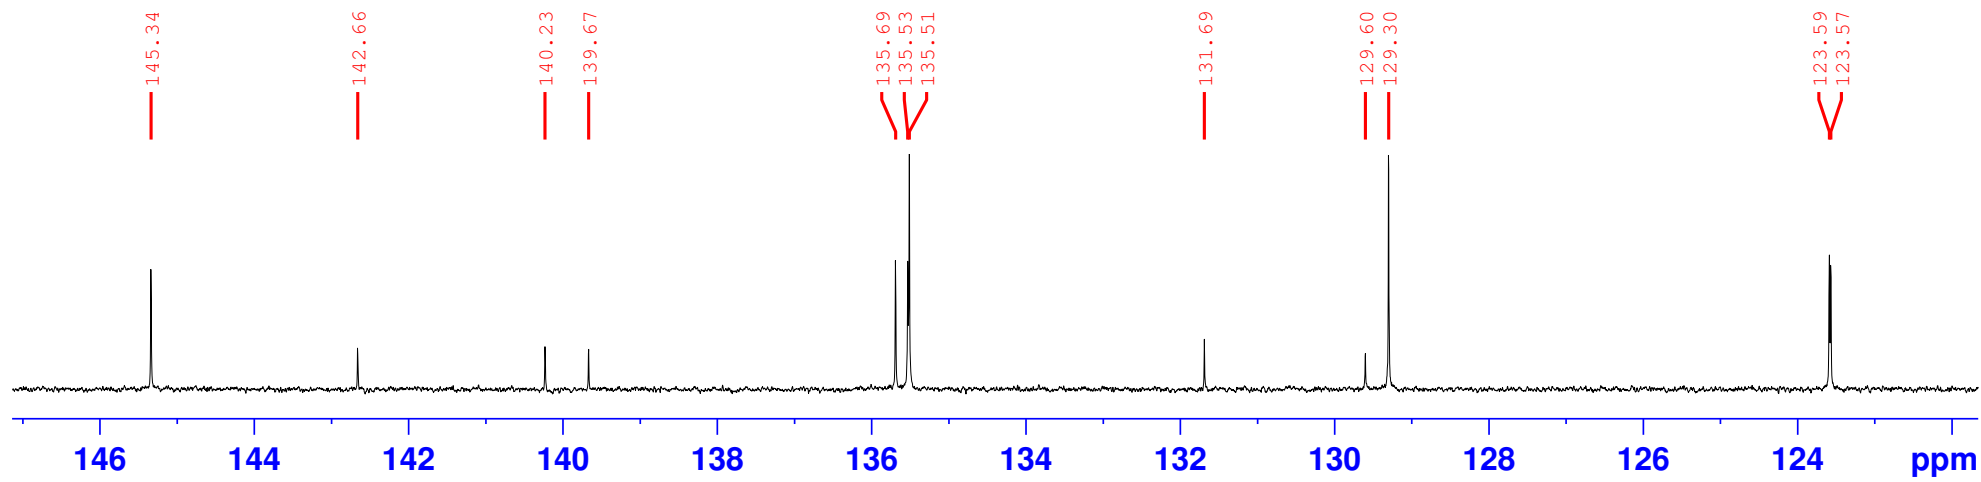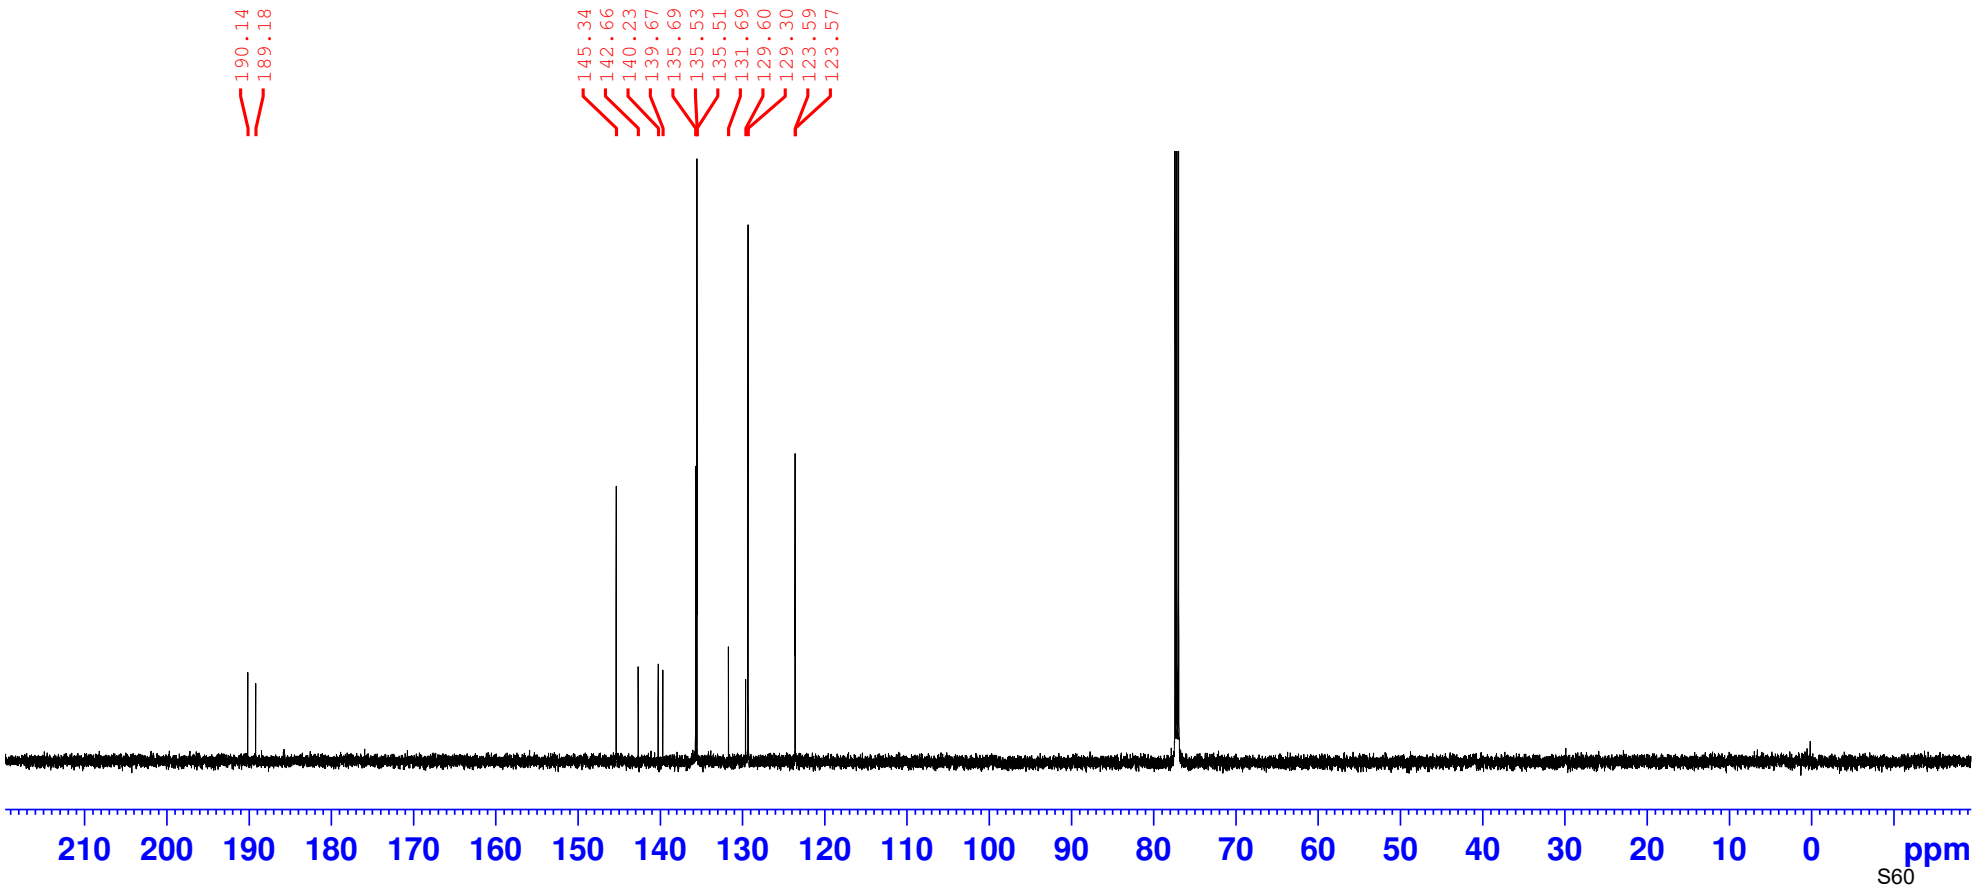

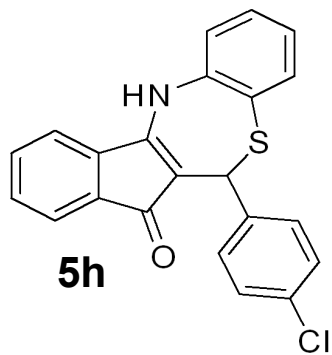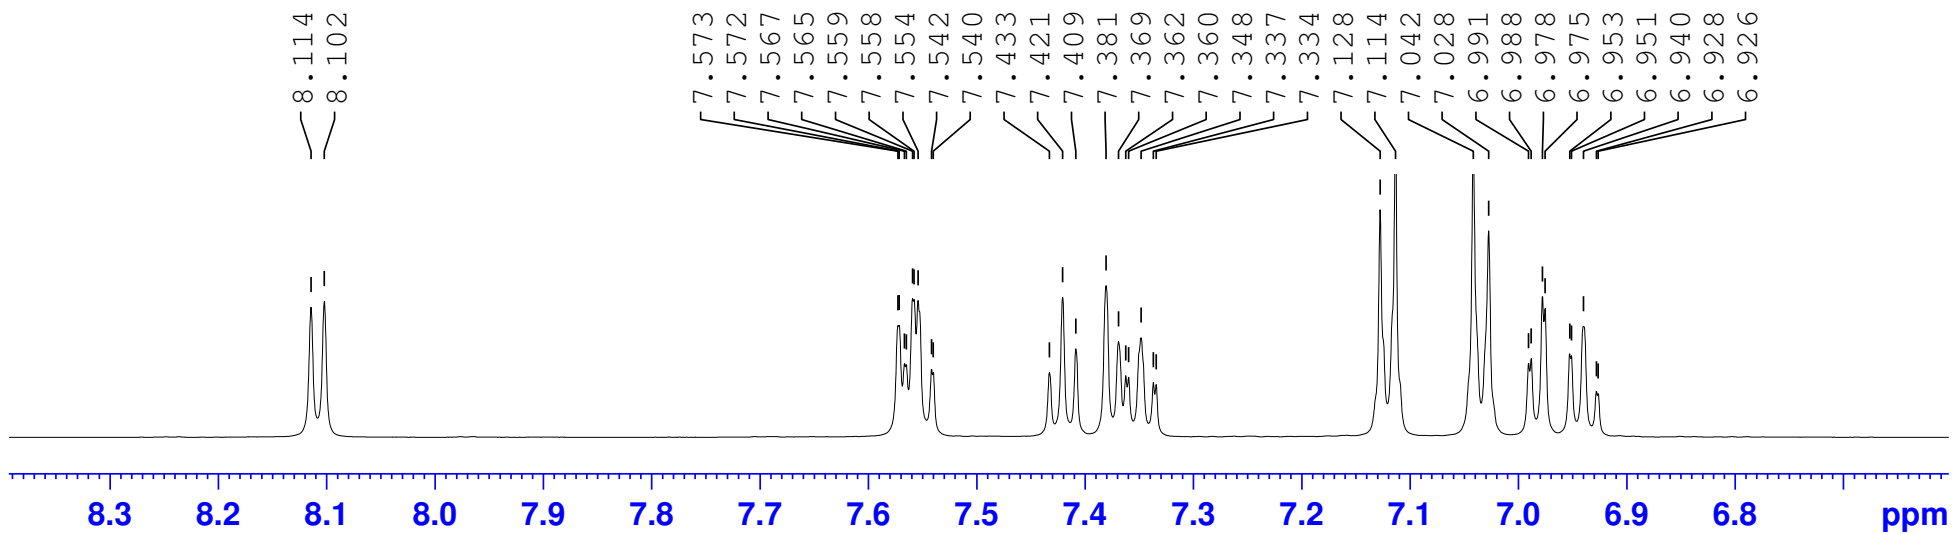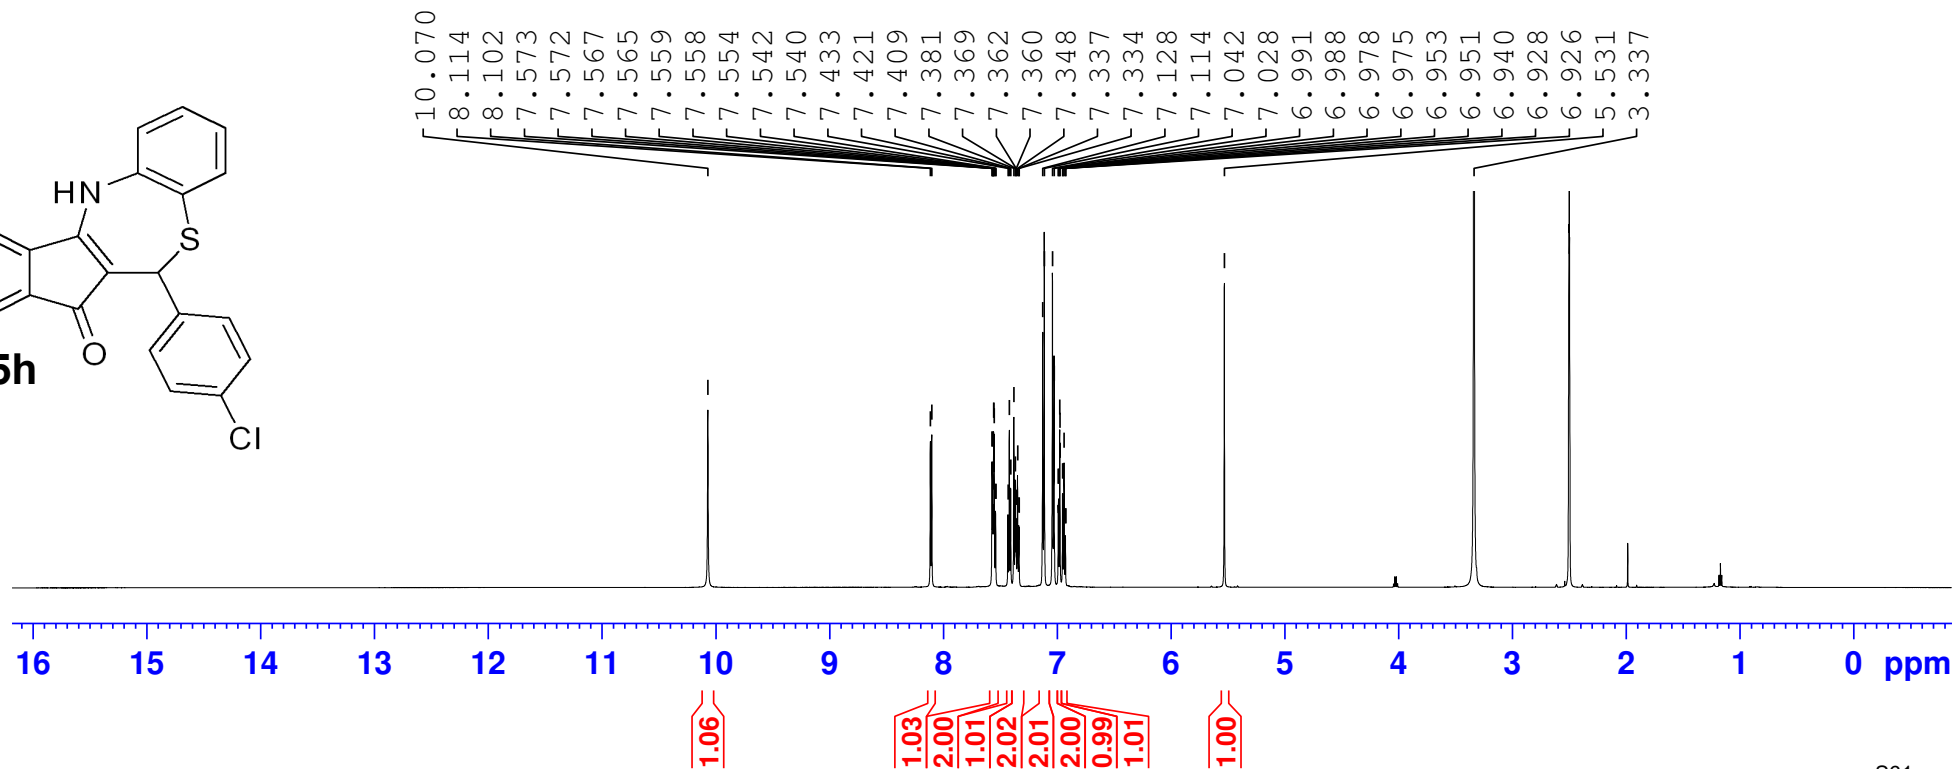

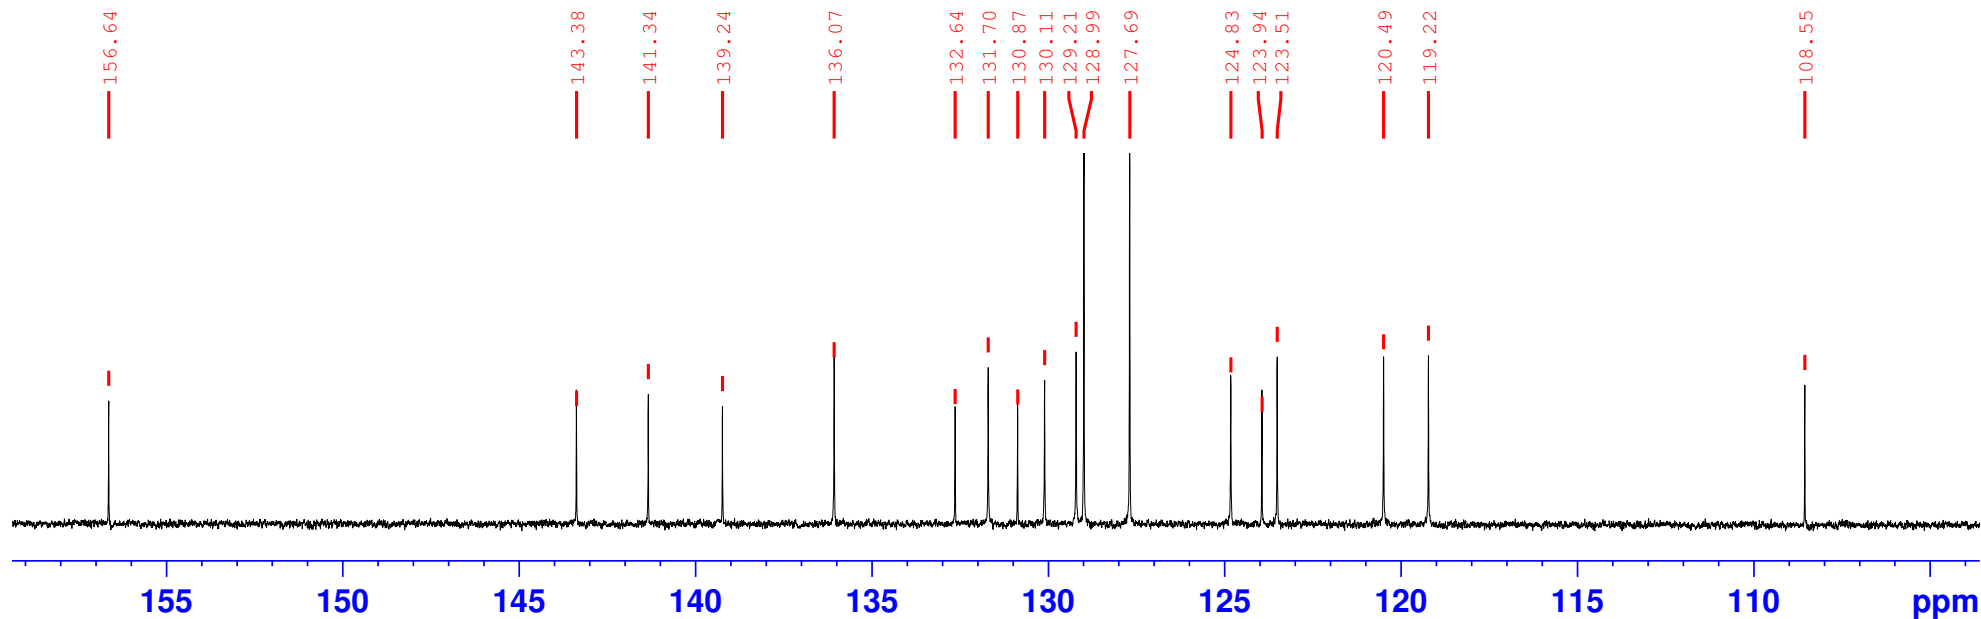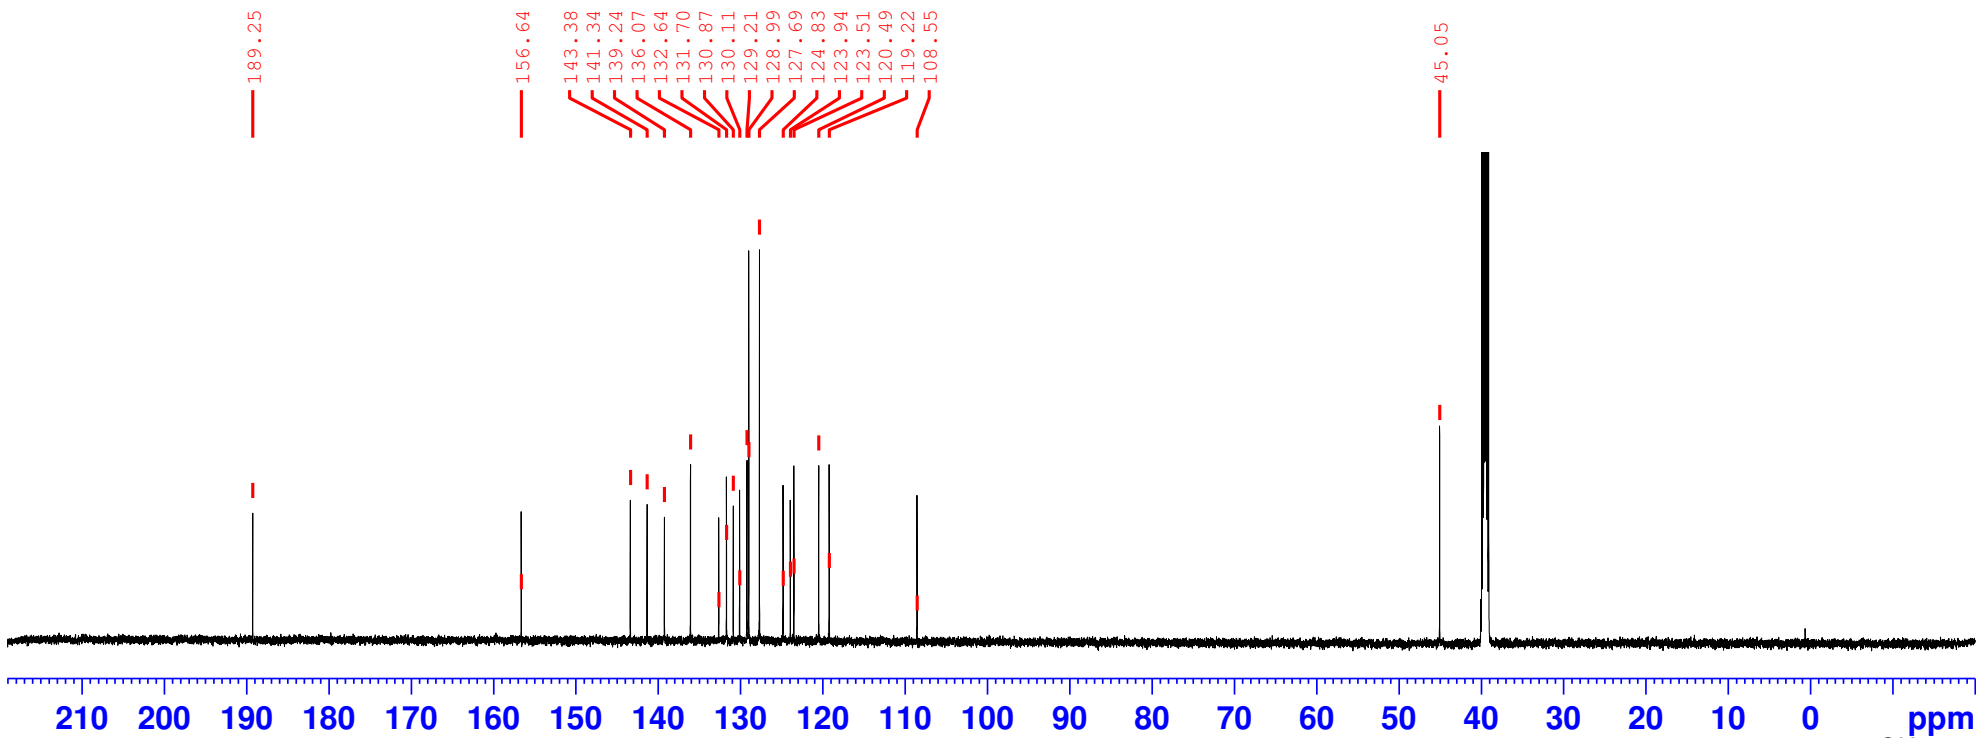

# User Spectrum Plot Report

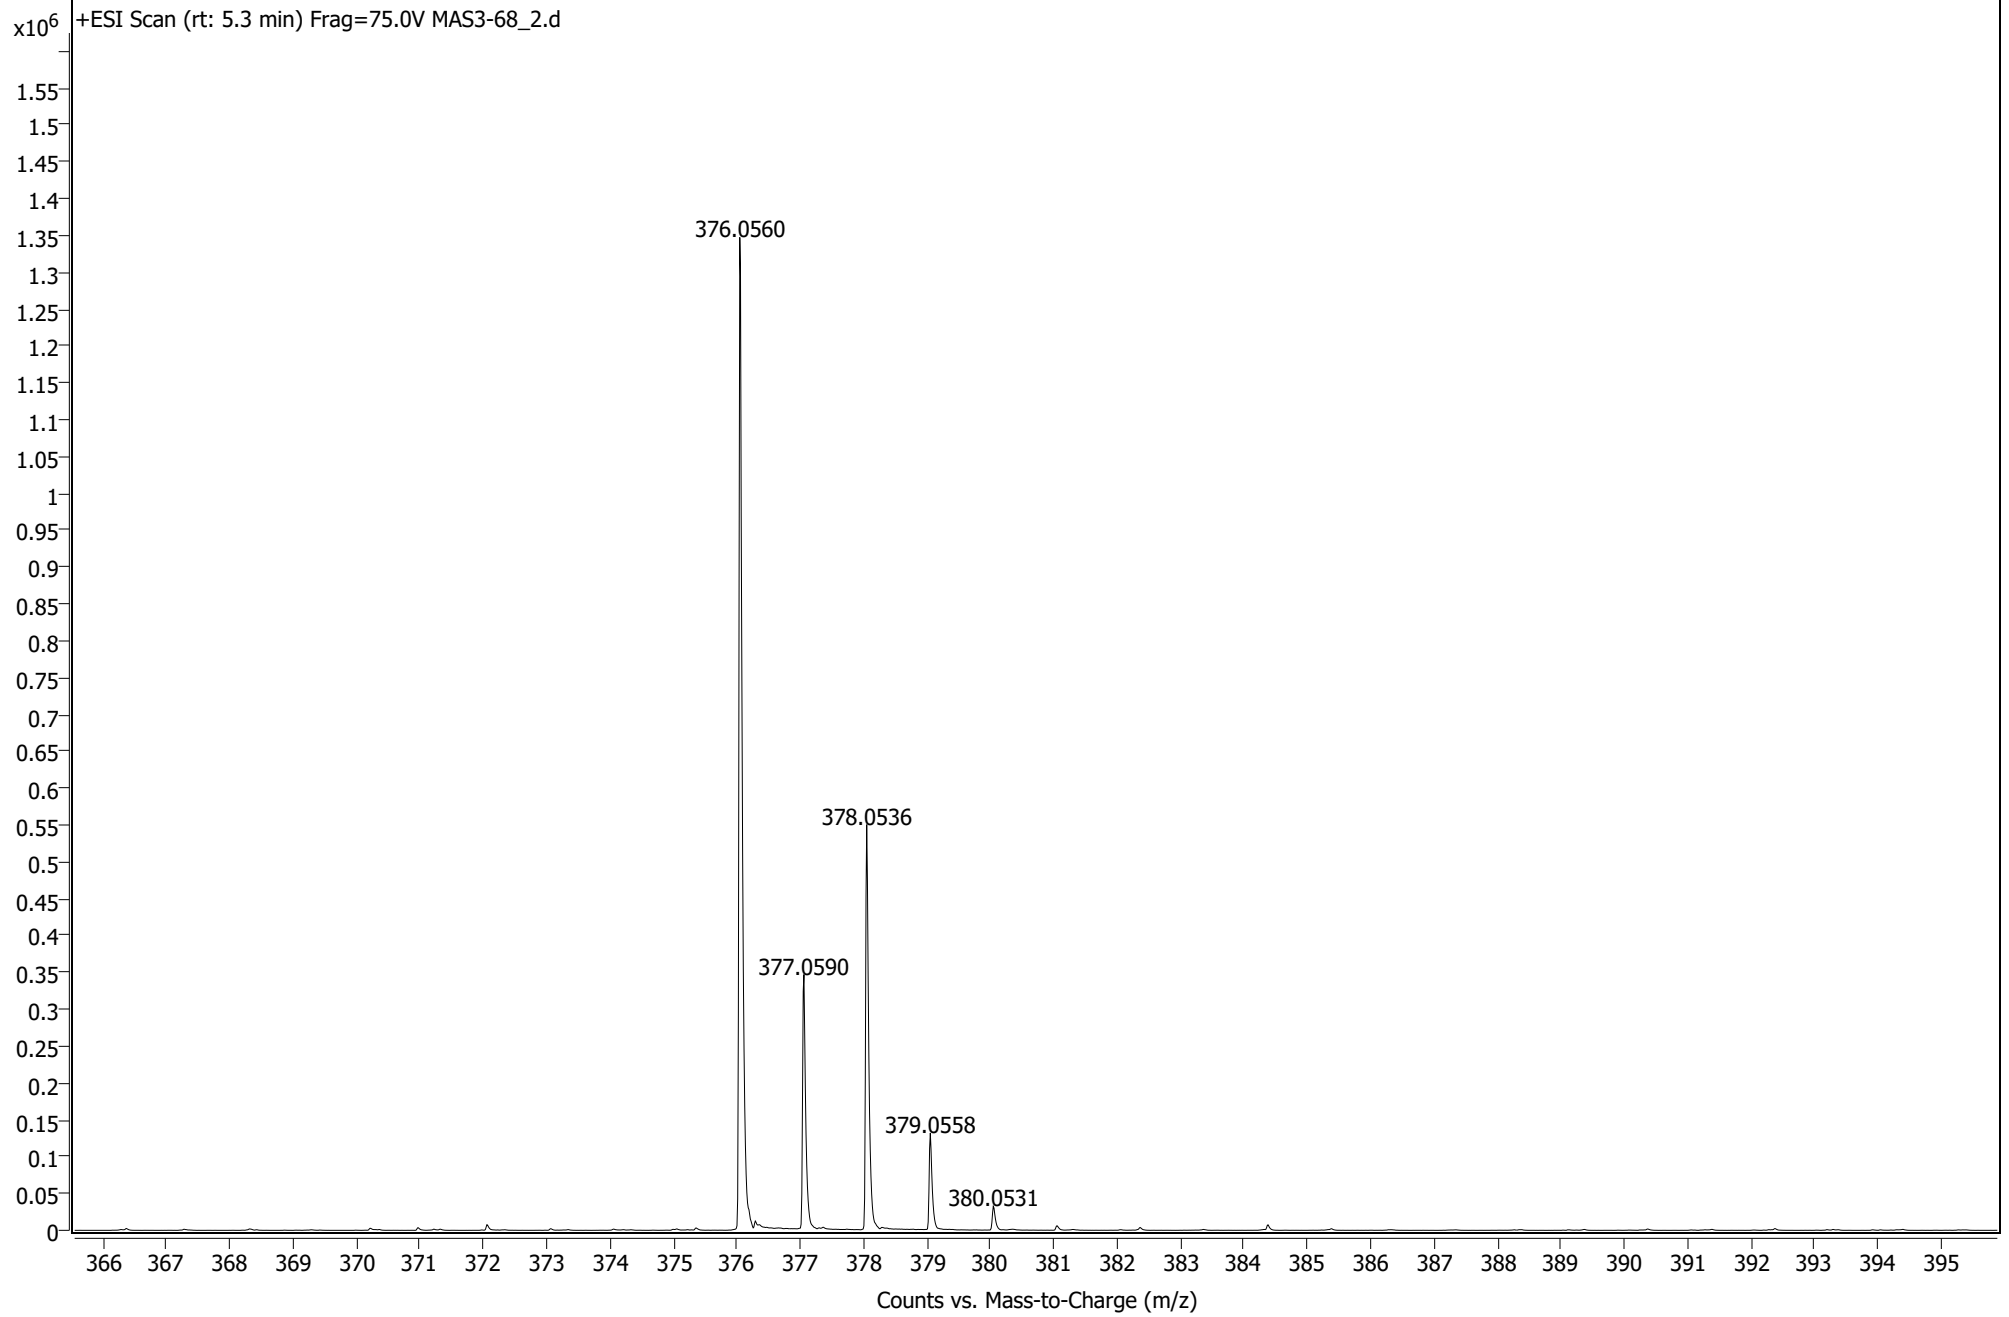

Sample Name: MAS3-68

```

=====
Acq. Operator   : SYSTEM                      Seq. Line :   10
Acq. Instrument : 1220 HPLC                   Location  :   61
Injection Date  : 9/1/2021 1:16:36 PM        Inj       :    1
                                           Inj Volume: 50.000 µl
Method          : C:\Chem32\1\Data\luana 2021-09-01 09-38-50\Luana_small_molecule.M (Sequence
                :                               Method)
Last changed    : 9/1/2021 9:41:46 AM by SYSTEM
Method Info     : MeOH/water

Sample Info     : MAS3-68
  
```

Additional Info : Peak(s) manually integrated

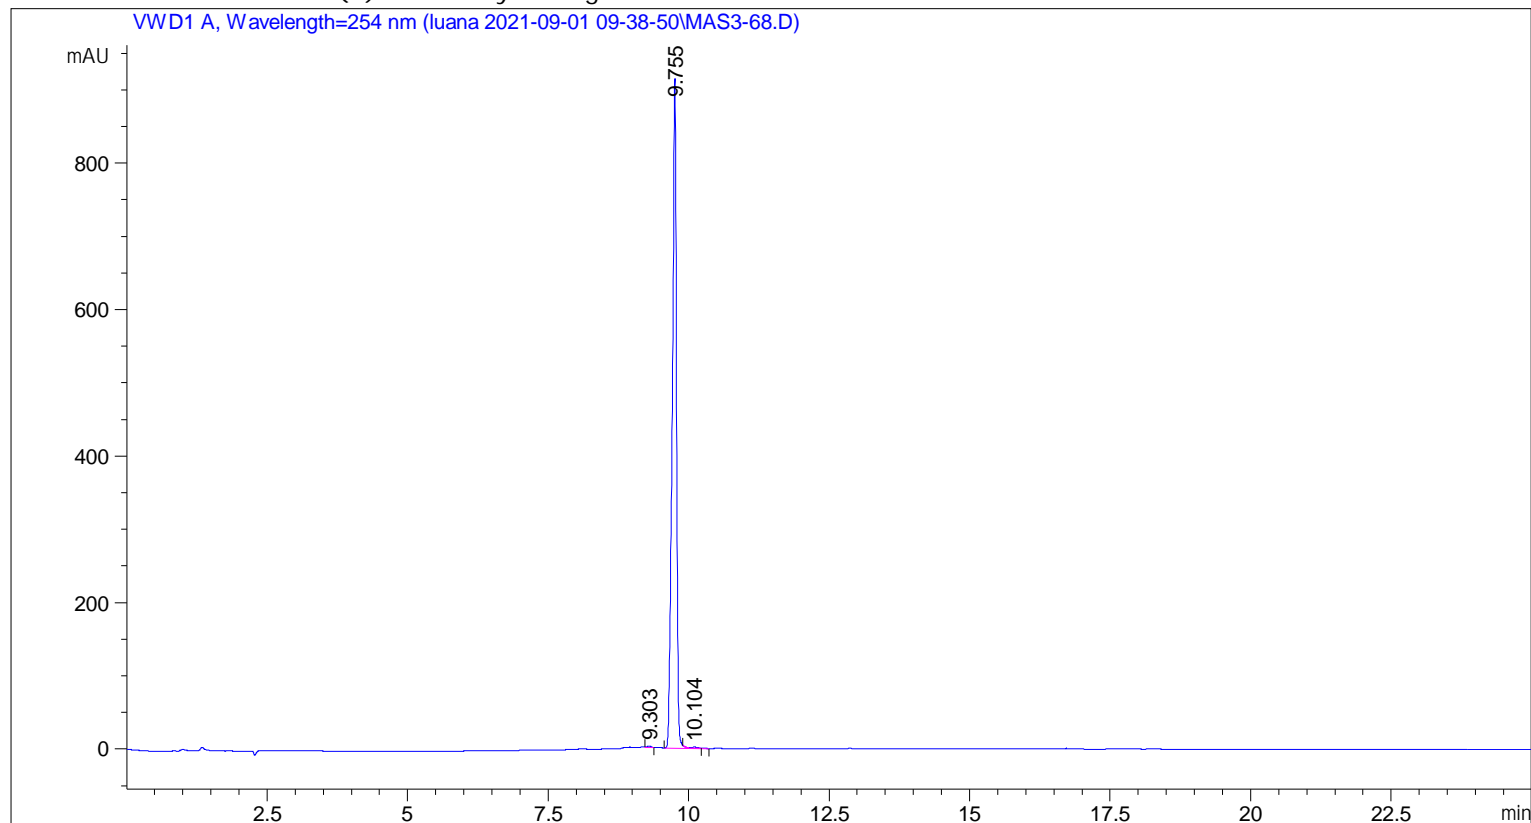

```

=====
                          Area Percent Report
=====
  
```

```

Sorted By      :      Signal
Multiplier     :      1.0000
Dilution       :      1.0000
Use Multiplier & Dilution Factor with ISTDs
  
```

Signal 1: VWD1 A, Wavelength=254 nm

| Peak # | RetTime [min] | Type | Width [min] | Area [mAU*s] | Height [mAU] | Area %  |
|--------|---------------|------|-------------|--------------|--------------|---------|
| 1      | 9.303         | VB   | 0.0807      | 12.70151     | 2.32658      | 0.2624  |
| 2      | 9.755         | BV R | 0.0763      | 4813.19189   | 915.44733    | 99.4327 |
| 3      | 10.104        | VV E | 0.1108      | 14.76127     | 1.77888      | 0.3049  |

```
Totals :                      4840.65467  919.55279
```



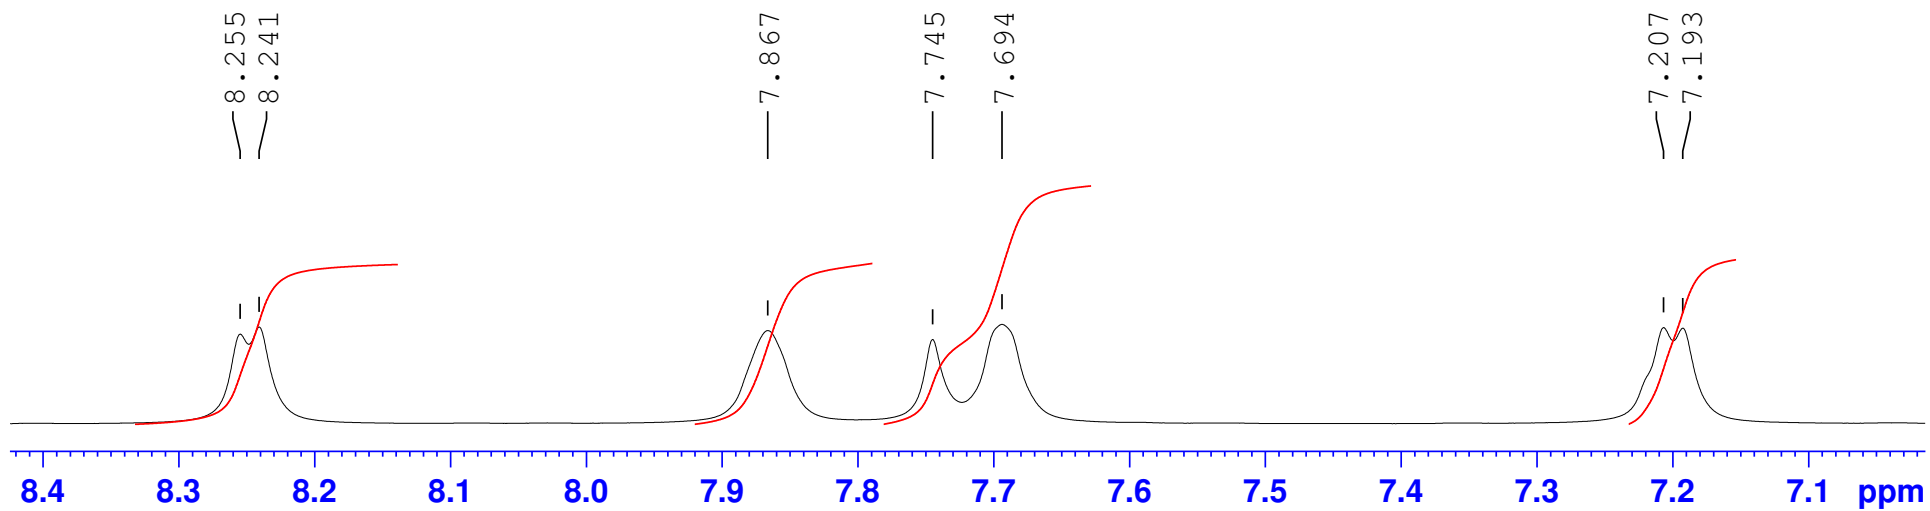

8.255  
8.241  
7.867  
7.745  
7.694  
7.207  
7.193

2.319

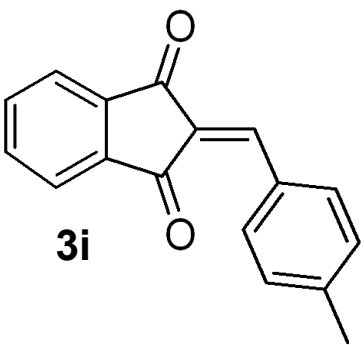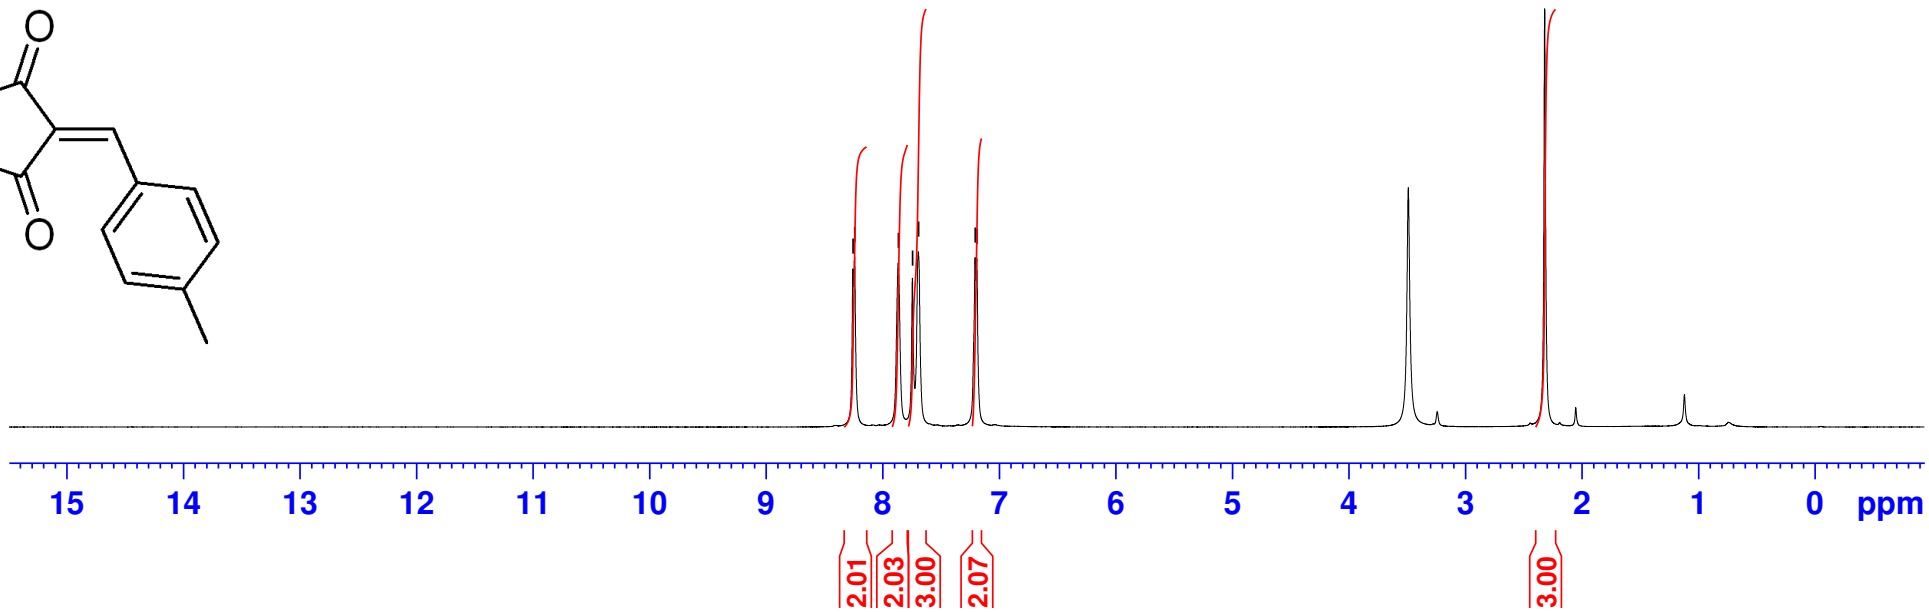

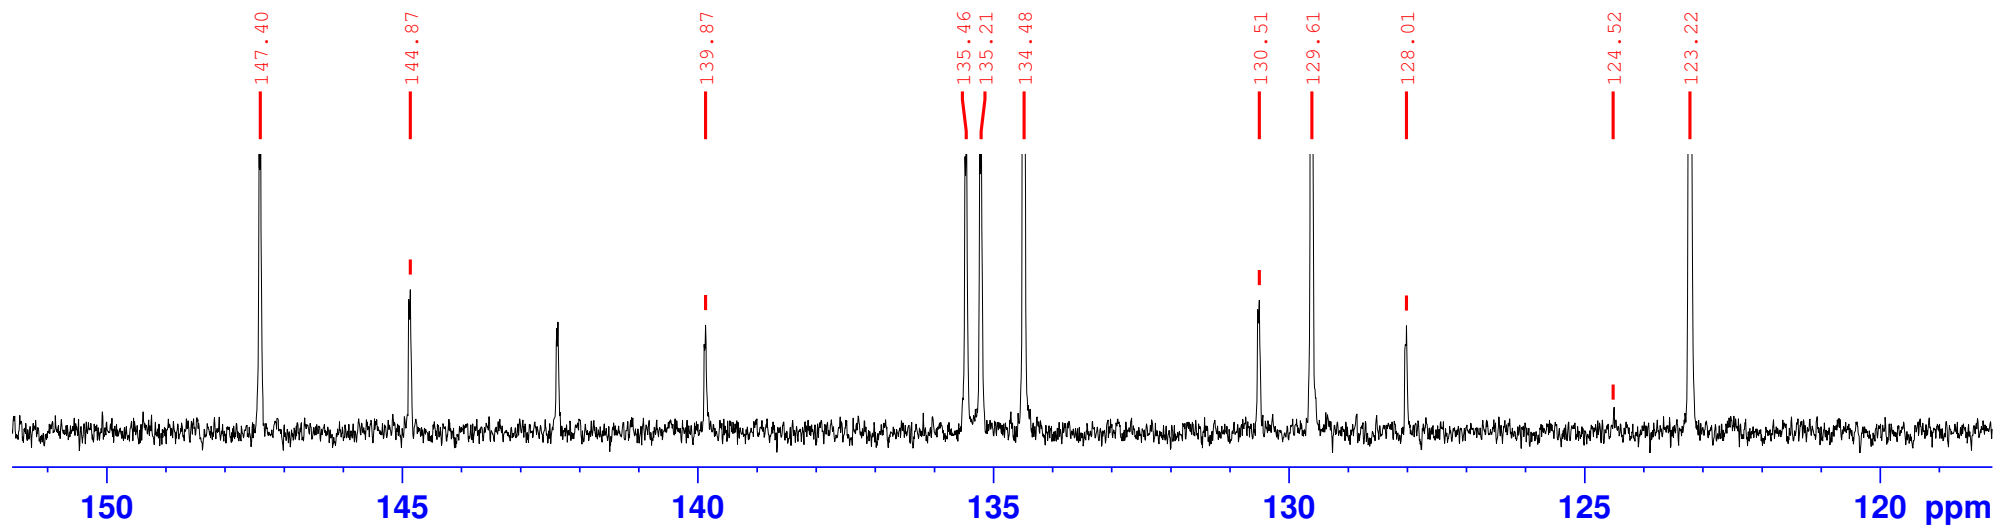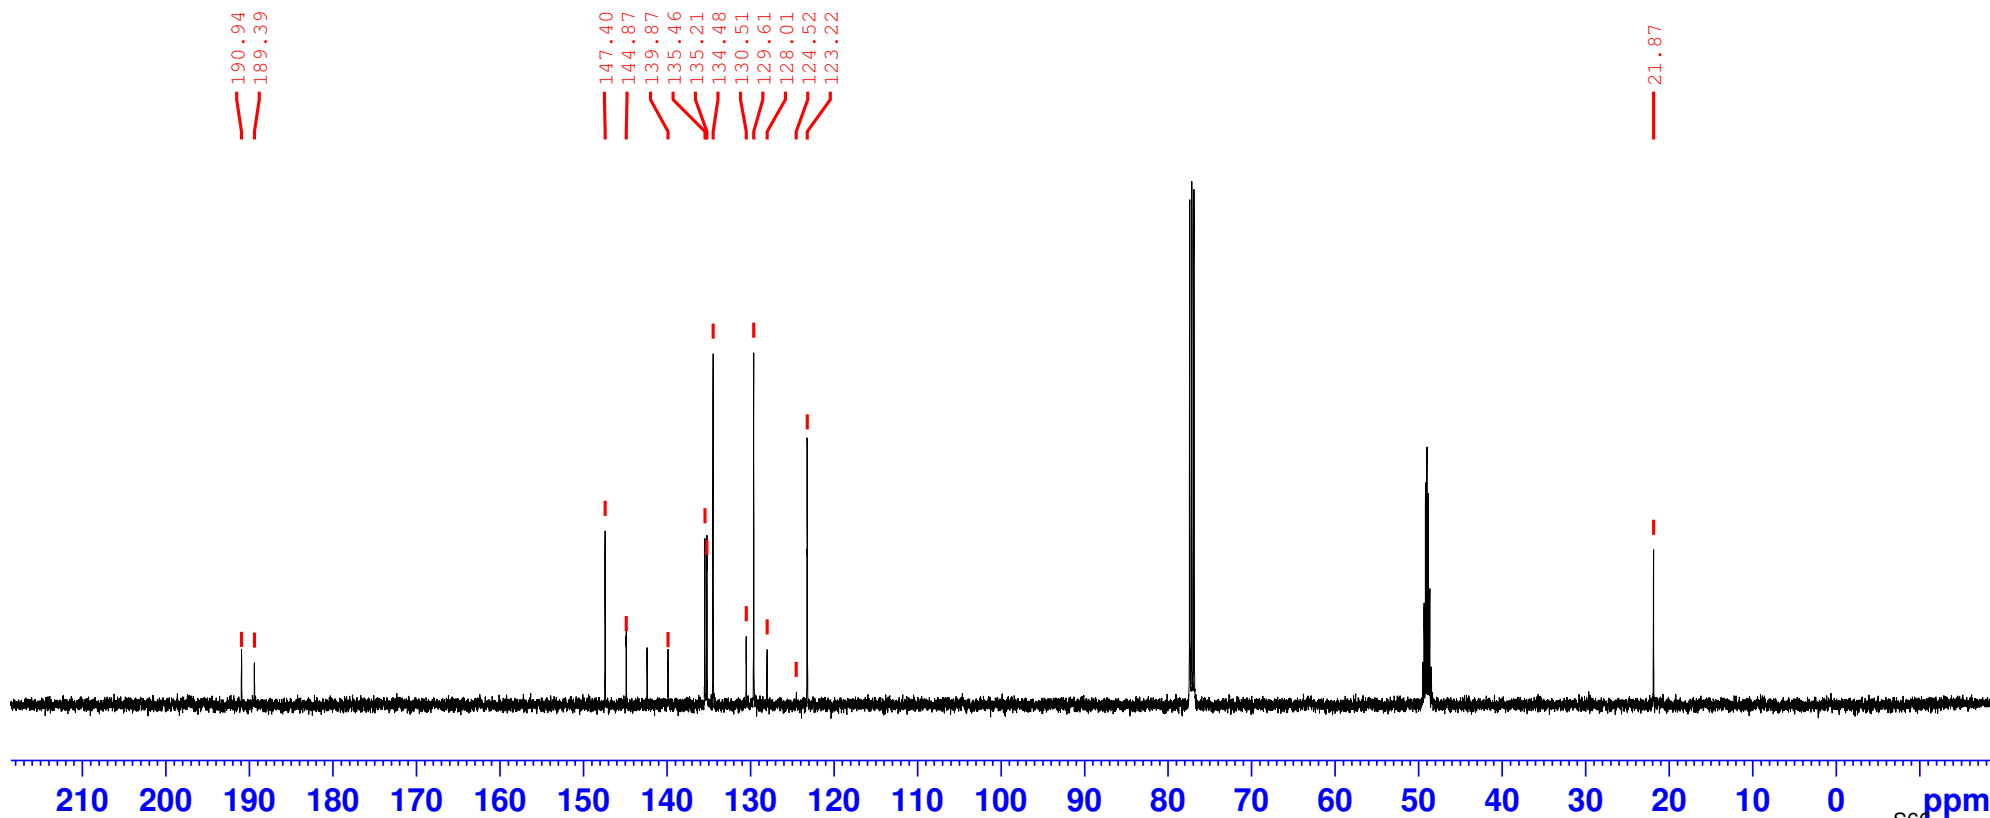

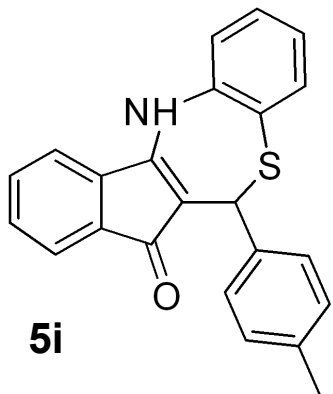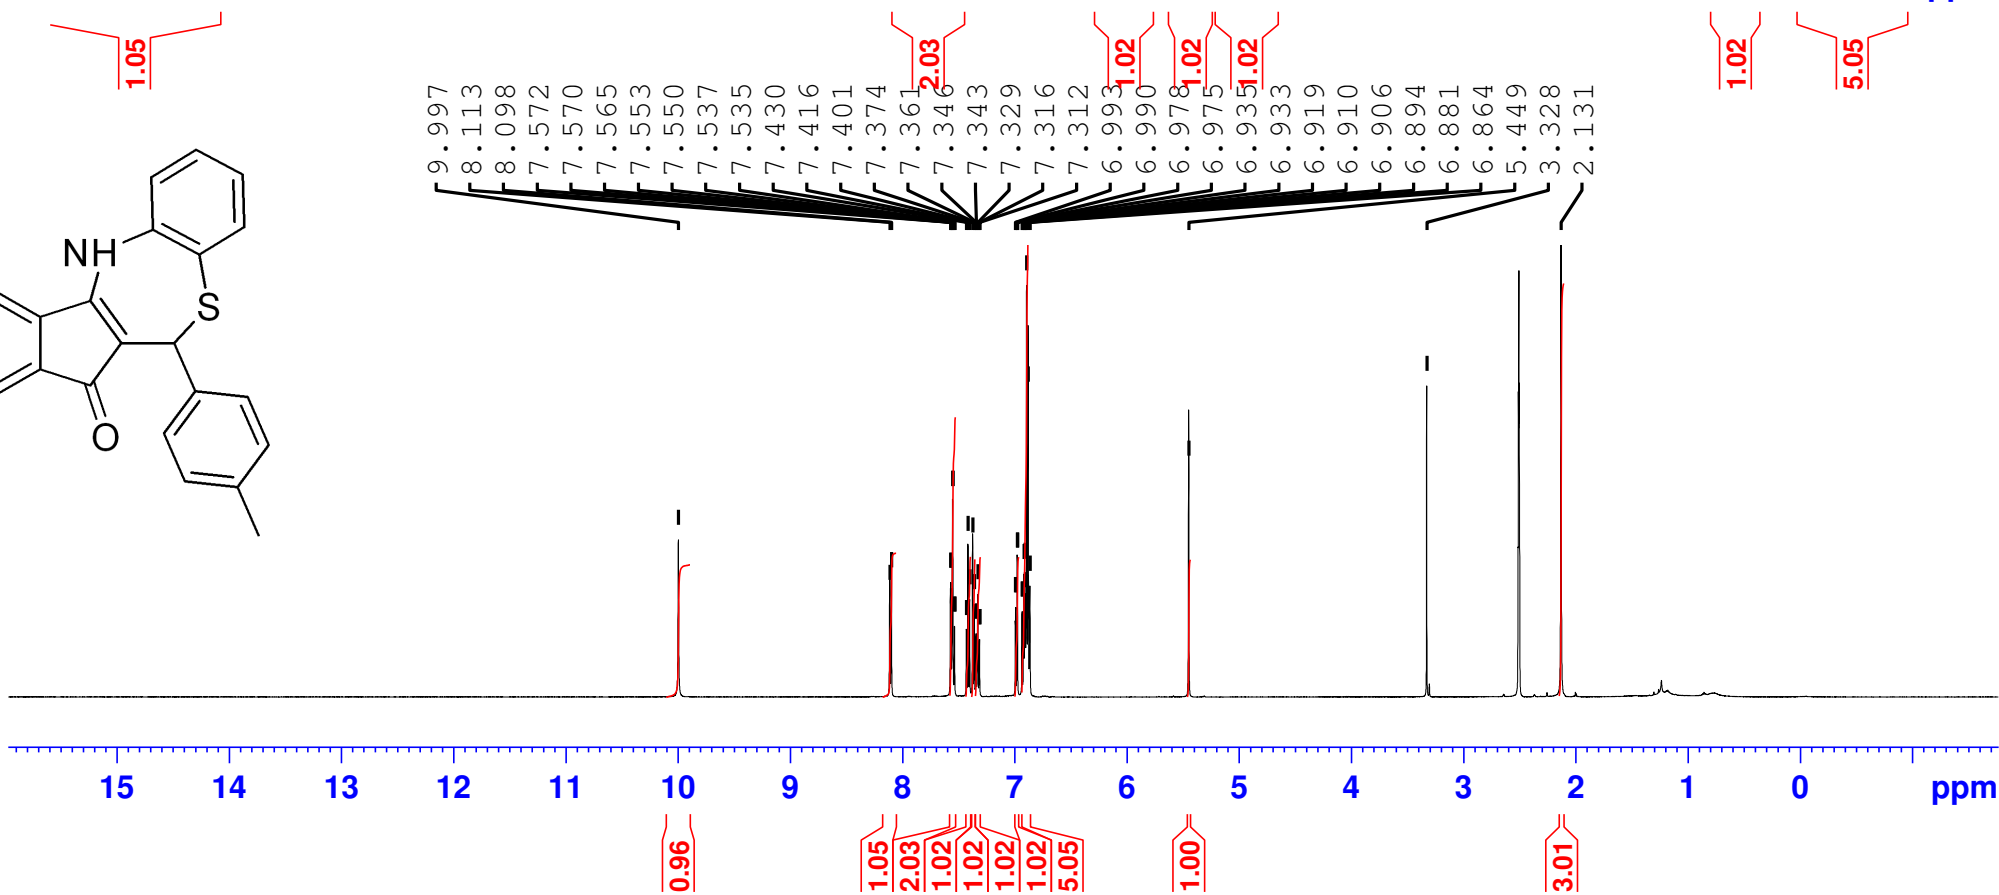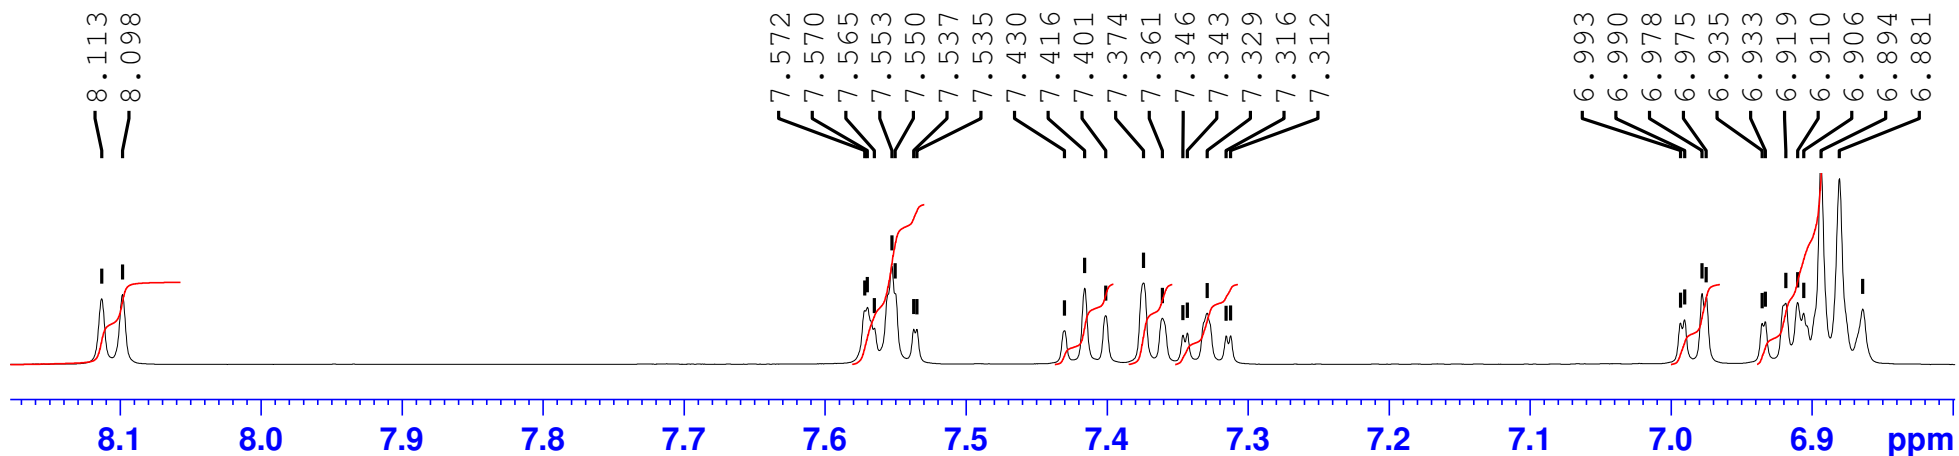

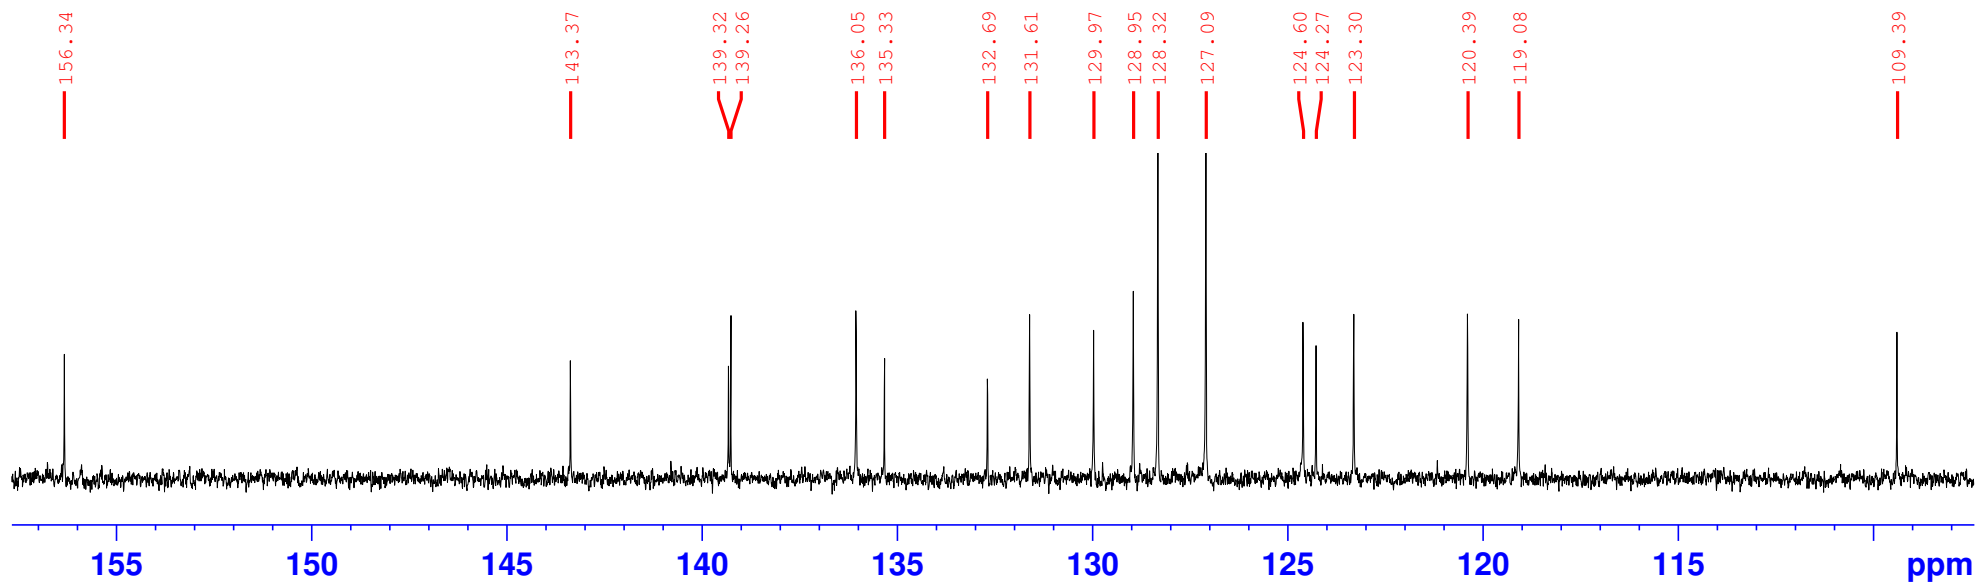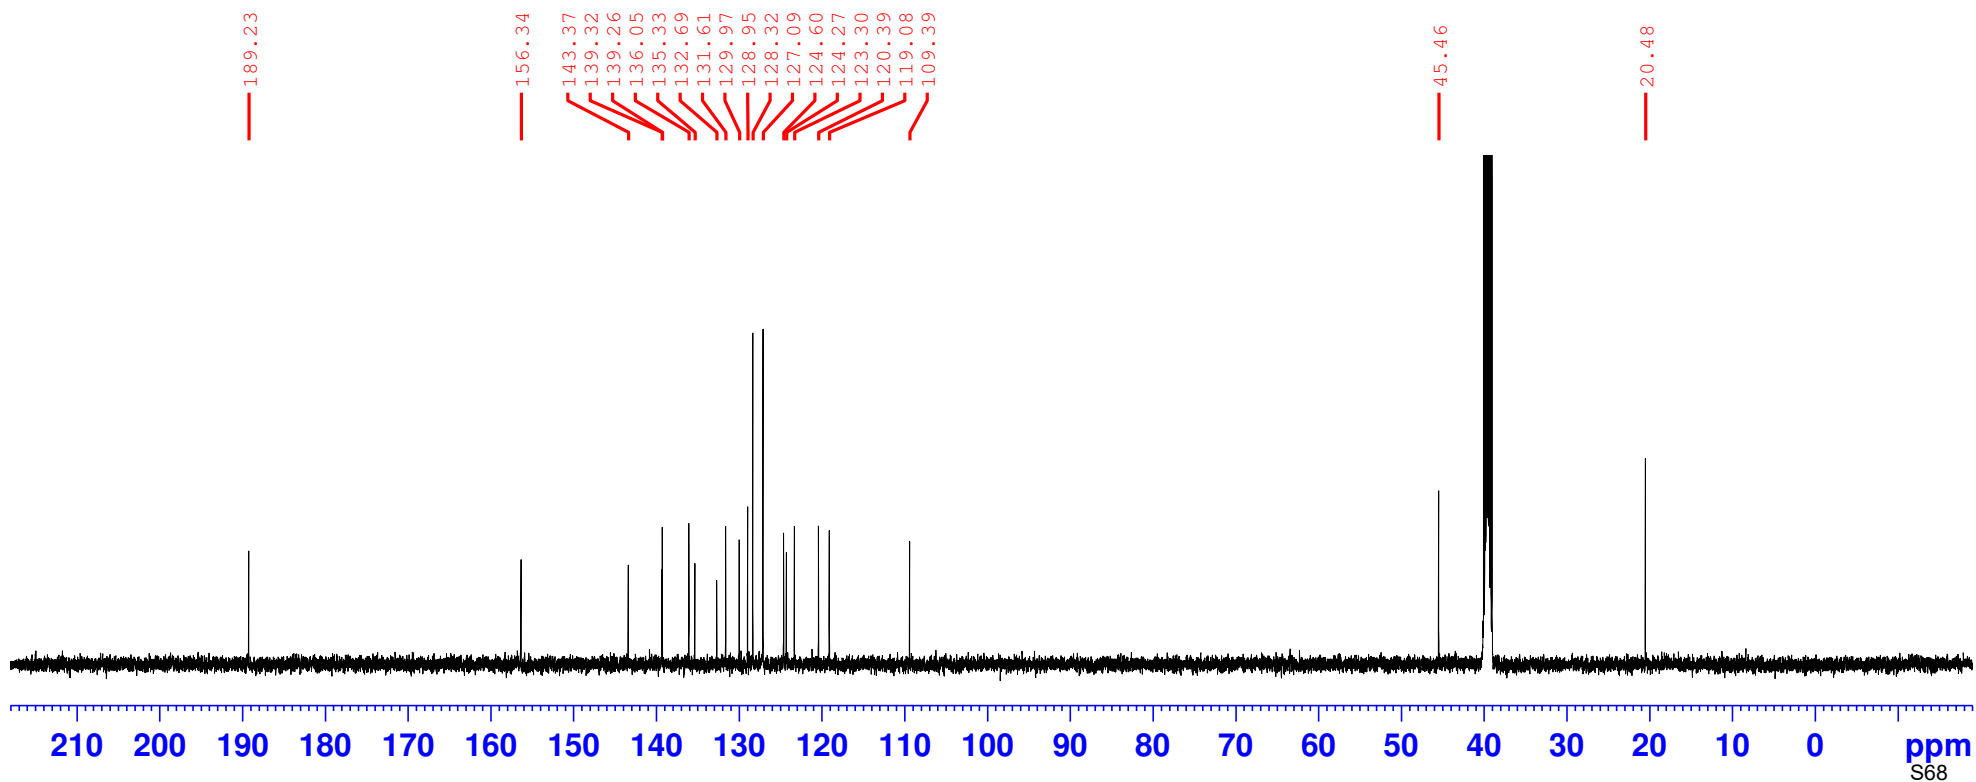

# User Spectrum Plot Report

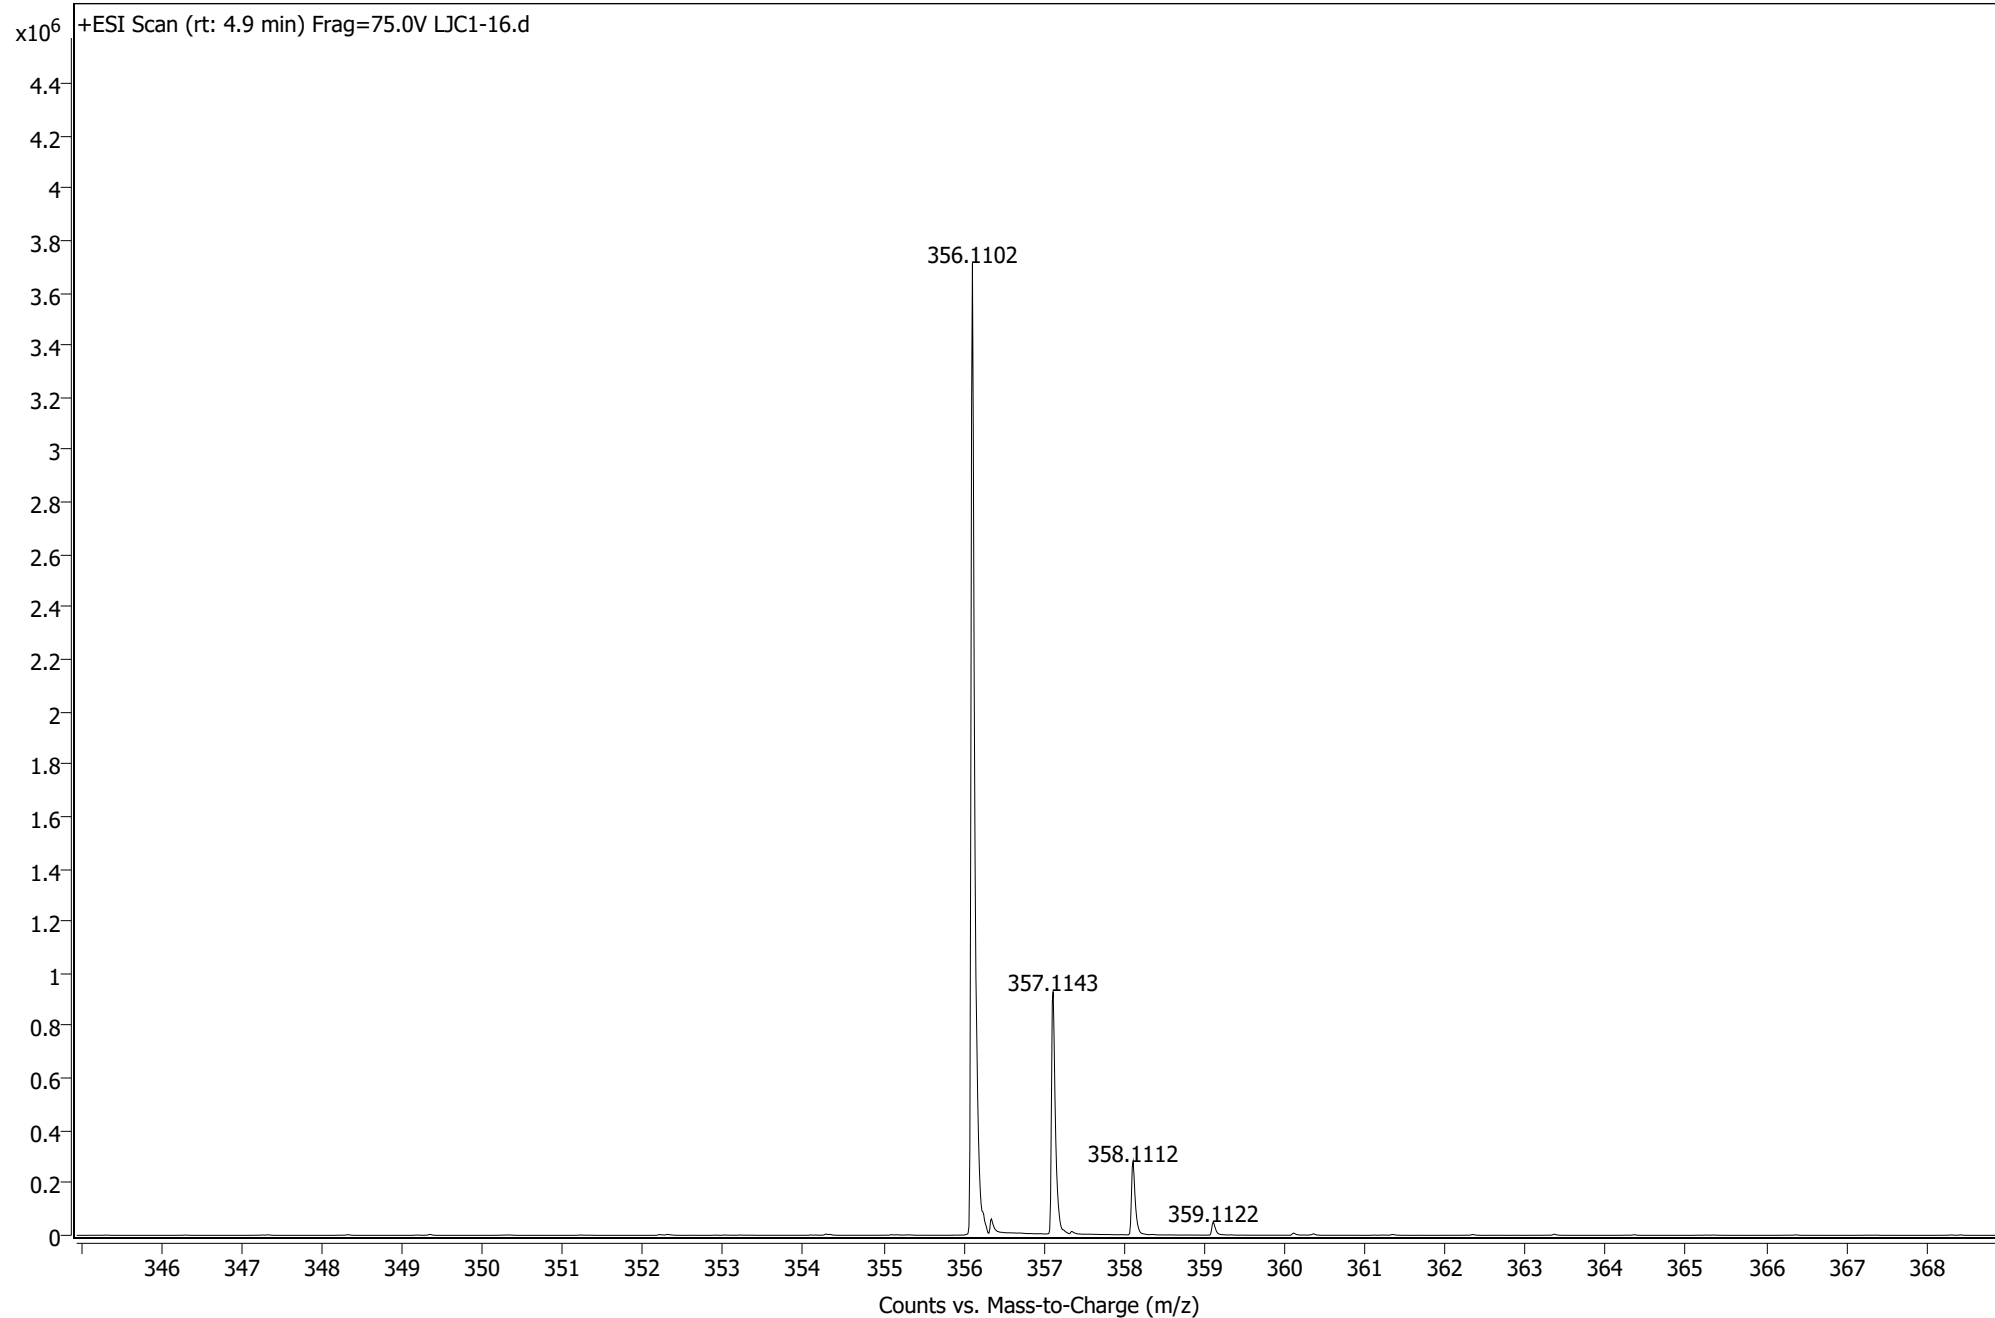

Sample Name: LJC 1-16

```

=====
Acq. Operator   : SYSTEM                      Seq. Line :    2
Acq. Instrument : 1220 HPLC                     Location  :   82
Injection Date  : 10/13/2022 10:41:43 AM      Inj       :    1
                                           Inj Volume: 70.000 µl
Different Inj Volume from Sample Entry! Actual Inj Volume : 50.000 µl
Method          : C:\Chem32\1\Data\luana 2022-10-13 10-13-01\Luana_small_molecule.M (Sequence
                :                               Method)
Last changed    : 10/13/2022 10:13:06 AM by SYSTEM
Method Info     : MeOH/water

```

Sample Info : LJC 1-16

Additional Info : Peak(s) manually integrated

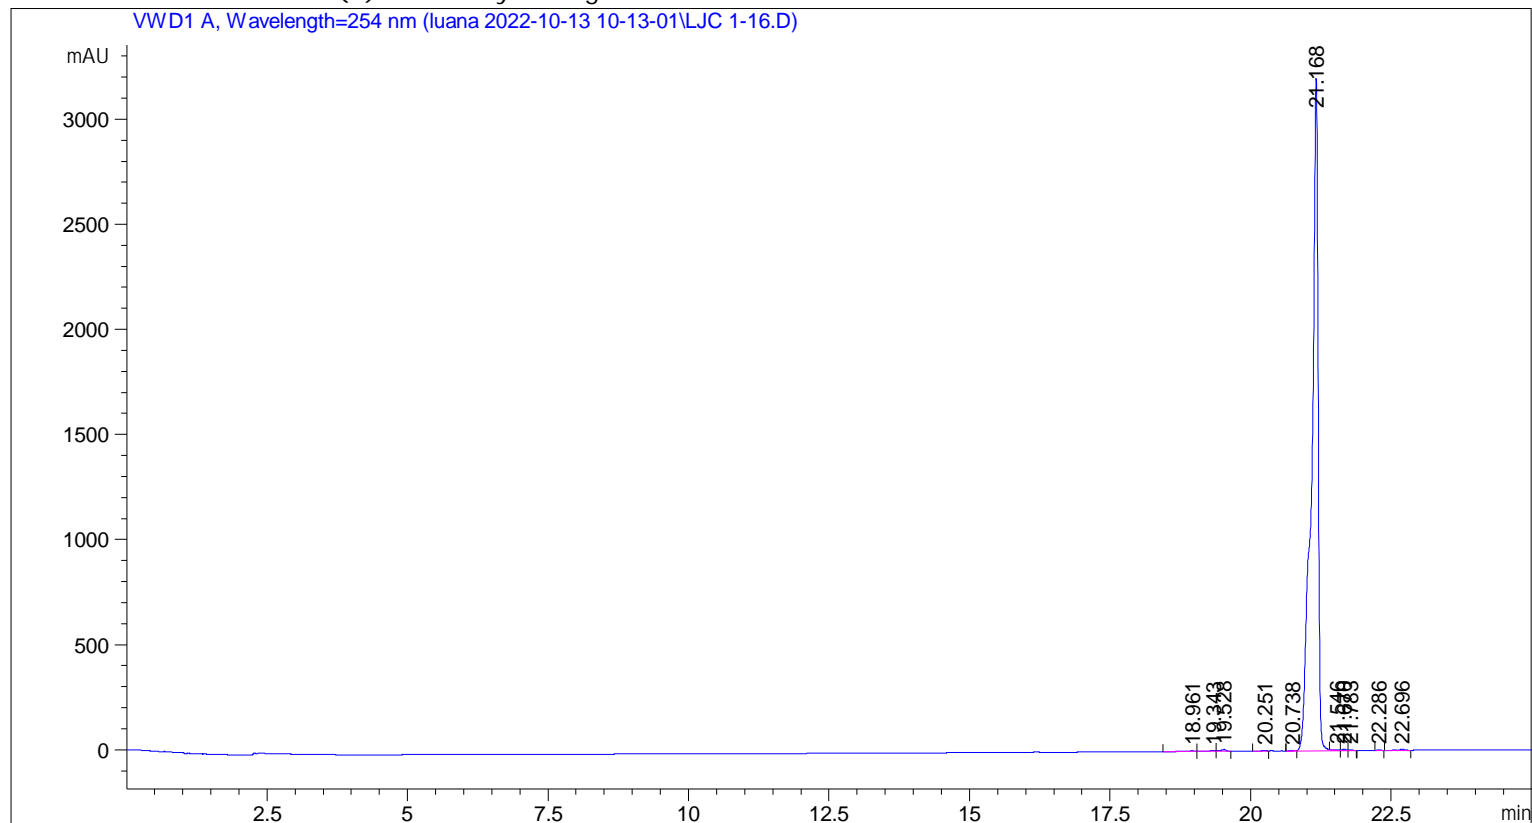

```

=====
                          Area Percent Report
=====

```

```

Sorted By      :      Signal
Multiplier     :      1.0000
Dilution       :      1.0000
Use Multiplier & Dilution Factor with ISTDs

```

Signal 1: VWD1 A, Wavelength=254 nm

| Peak # | RetTime [min] | Type | Width [min] | Area [mAU*s] | Height [mAU] | Area % |
|--------|---------------|------|-------------|--------------|--------------|--------|
| 1      | 18.961        | BV   | 0.1473      | 42.43138     | 3.85711      | 0.1646 |
| 2      | 19.343        | VV   | 0.1368      | 38.71626     | 3.86751      | 0.1501 |
| 3      | 19.528        | VB   | 0.1094      | 67.21614     | 8.67919      | 0.2607 |
| 4      | 20.251        | BV   | 0.1107      | 17.27770     | 2.24765      | 0.0670 |

| Peak # | RetTime [min] | Type | Width [min] | Area [mAU*s] | Height [mAU] | Area %  |
|--------|---------------|------|-------------|--------------|--------------|---------|
| 5      | 20.738        | BV E | 0.0749      | 10.98089     | 2.21383      | 0.0426  |
| 6      | 21.168        | VV R | 0.1110      | 2.55137e4    | 3199.24023   | 98.9471 |
| 7      | 21.546        | VV E | 0.0833      | 14.64745     | 2.50039      | 0.0568  |
| 8      | 21.670        | VV E | 0.0839      | 28.88376     | 4.96104      | 0.1120  |
| 9      | 21.783        | VB E | 0.0711      | 16.66855     | 3.52928      | 0.0646  |
| 10     | 22.286        | VB   | 0.0634      | 7.36391      | 1.81084      | 0.0286  |
| 11     | 22.696        | VB R | 0.0743      | 27.31478     | 5.46726      | 0.1059  |

Totals :                                   2.57852e4  3238.37434

=====  
\*\*\* End of Report \*\*\*

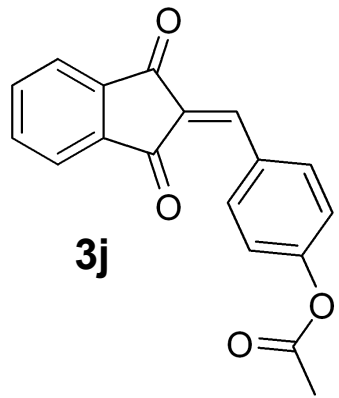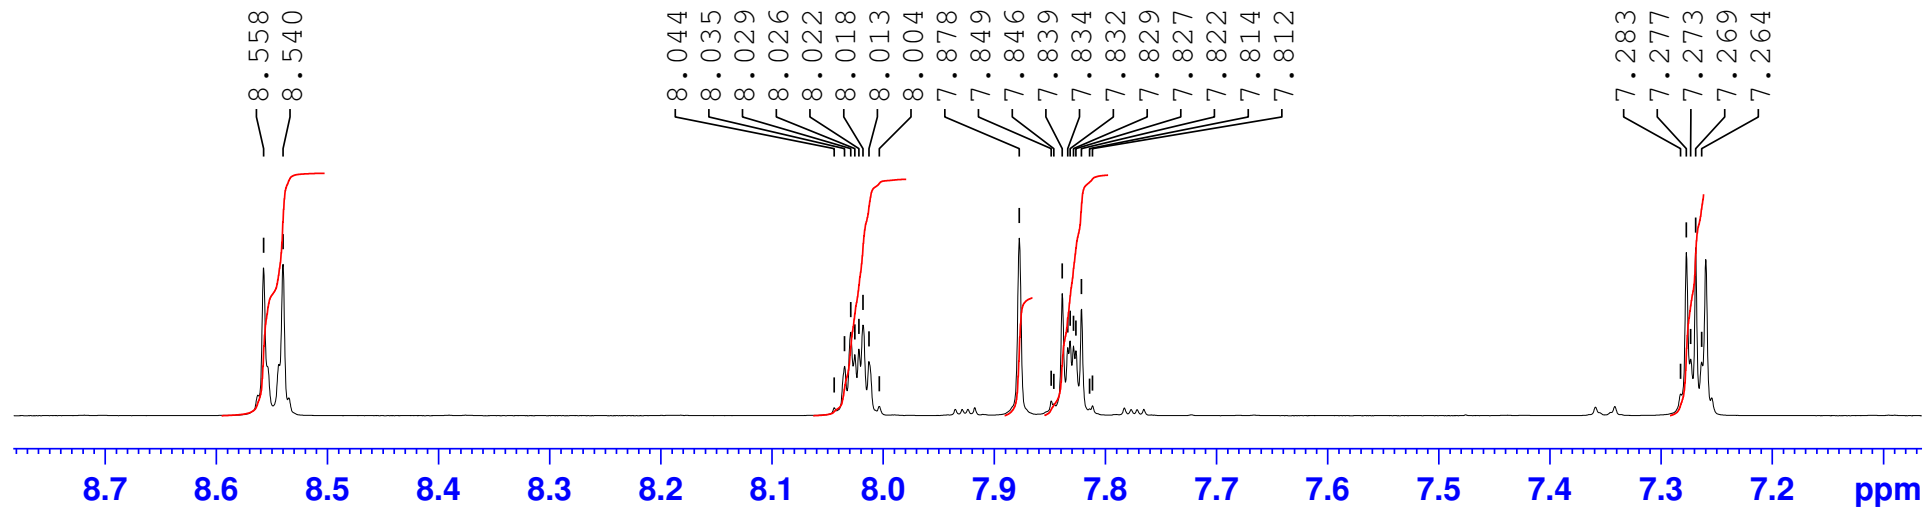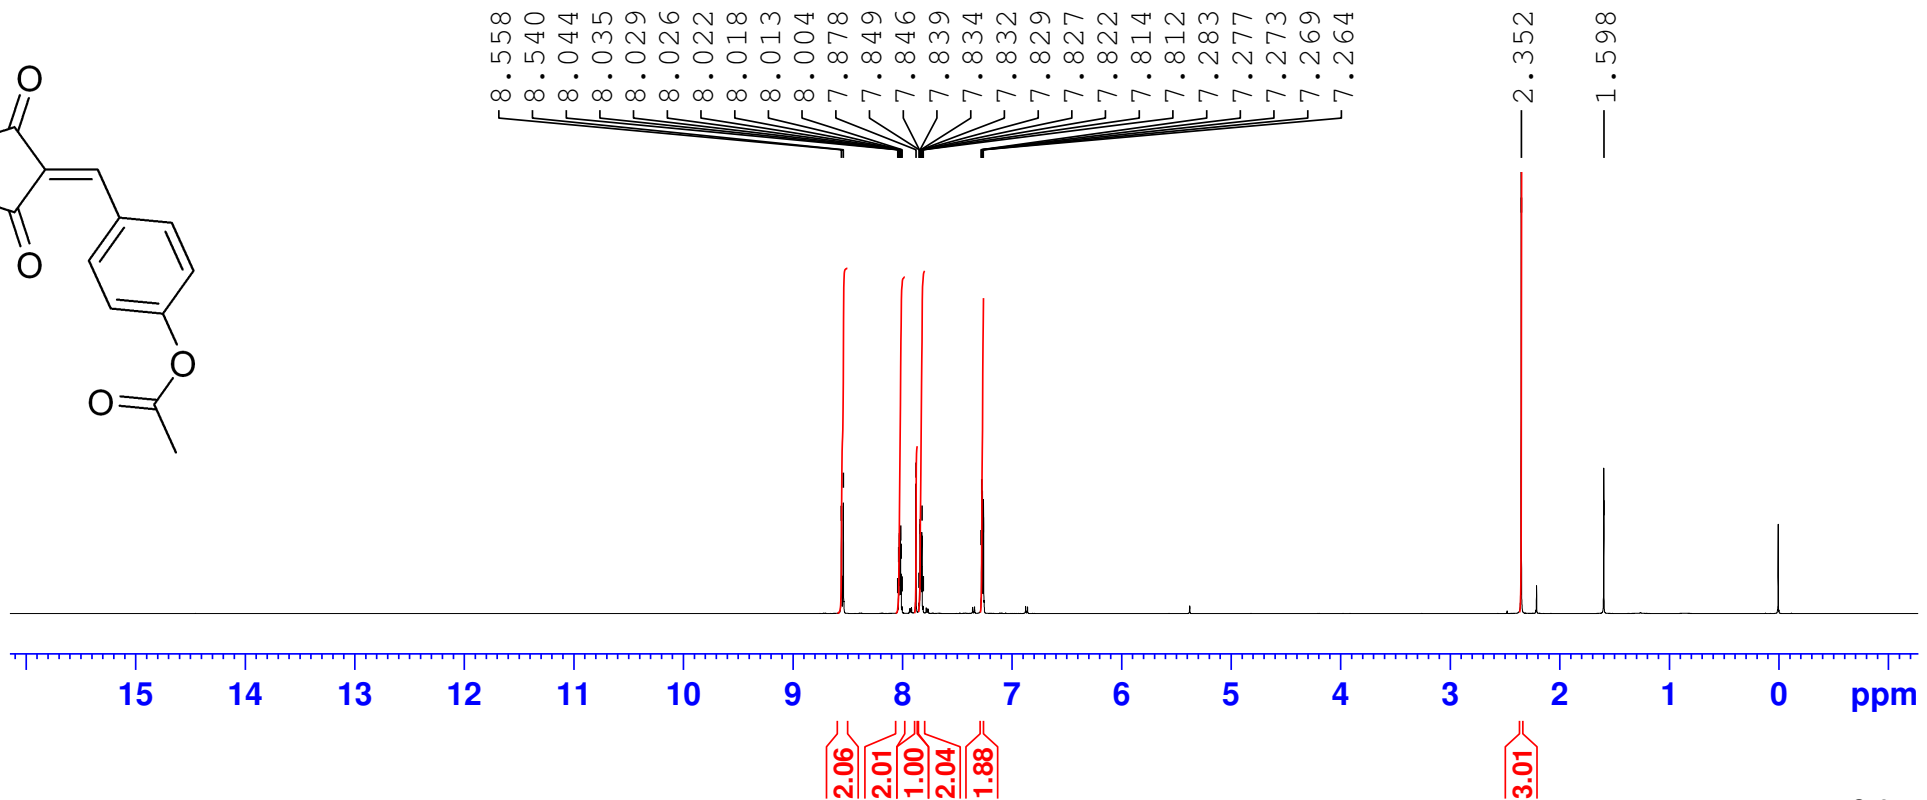



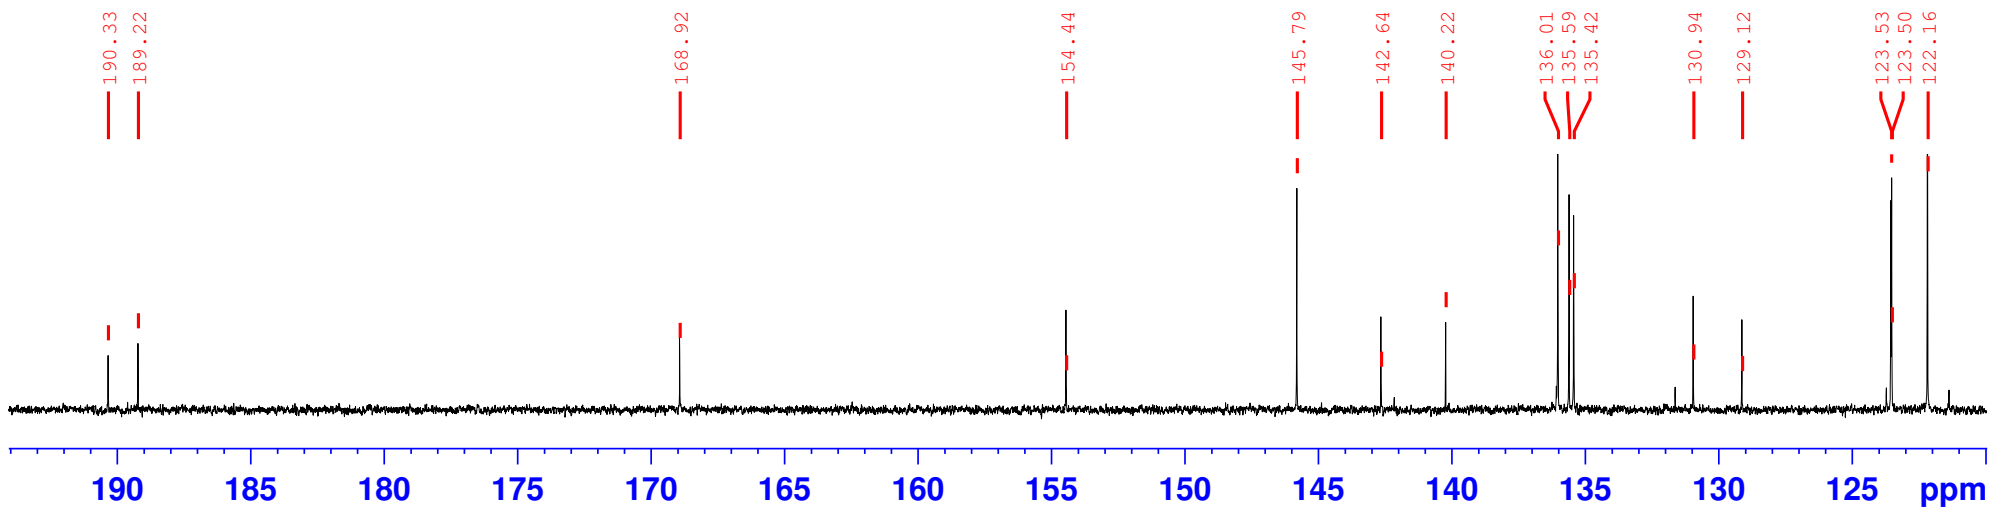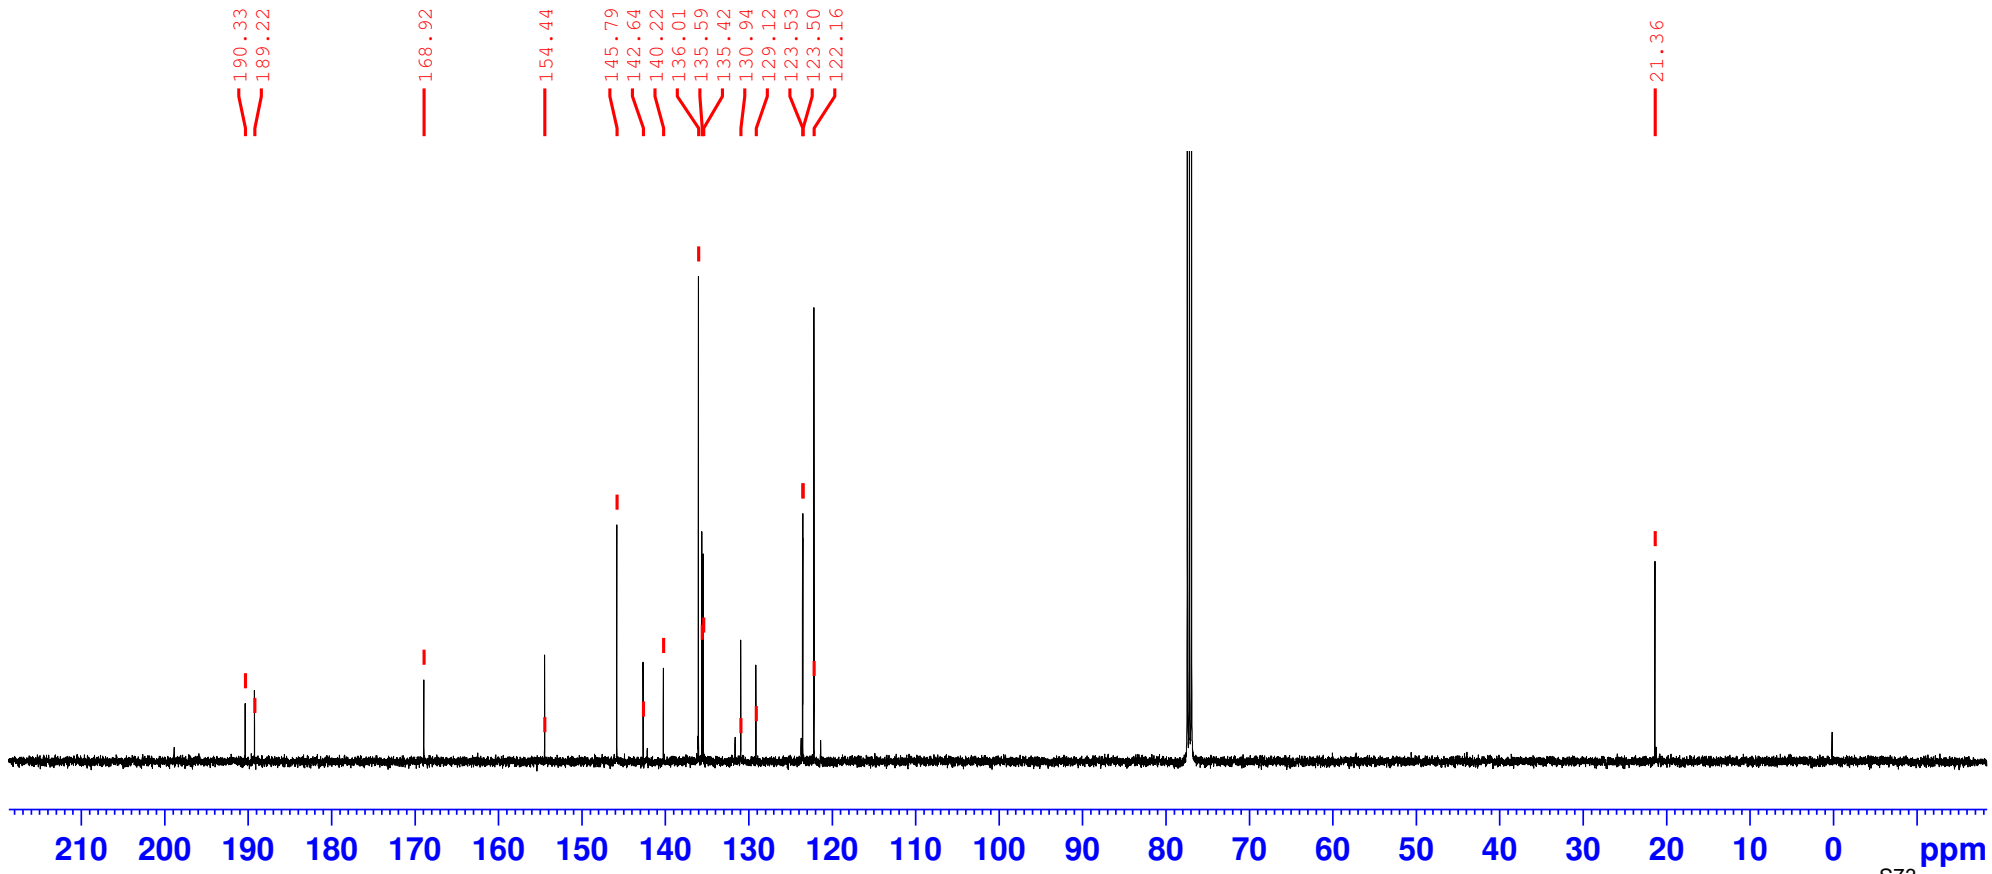

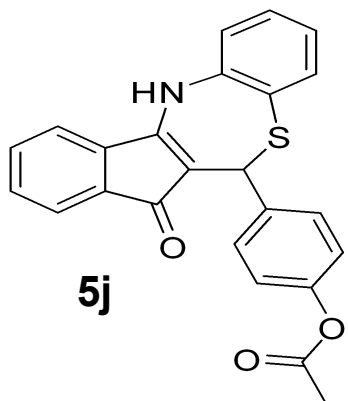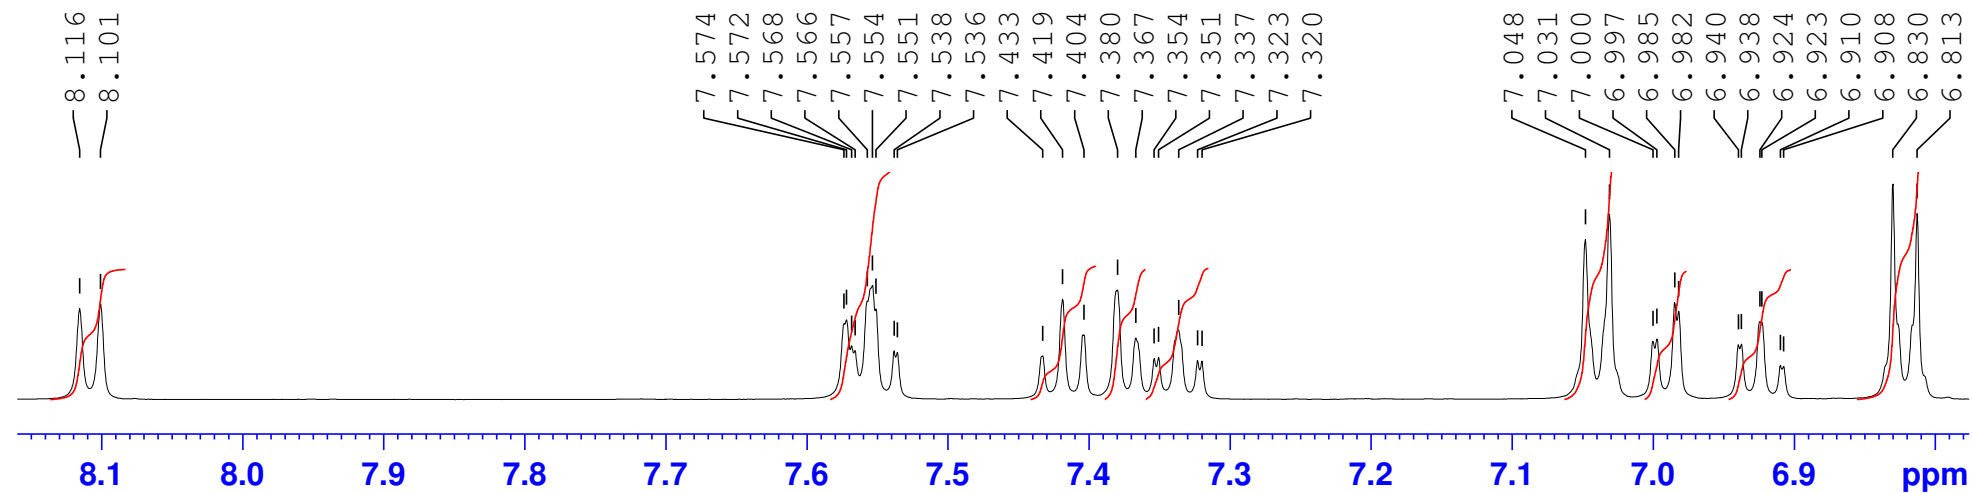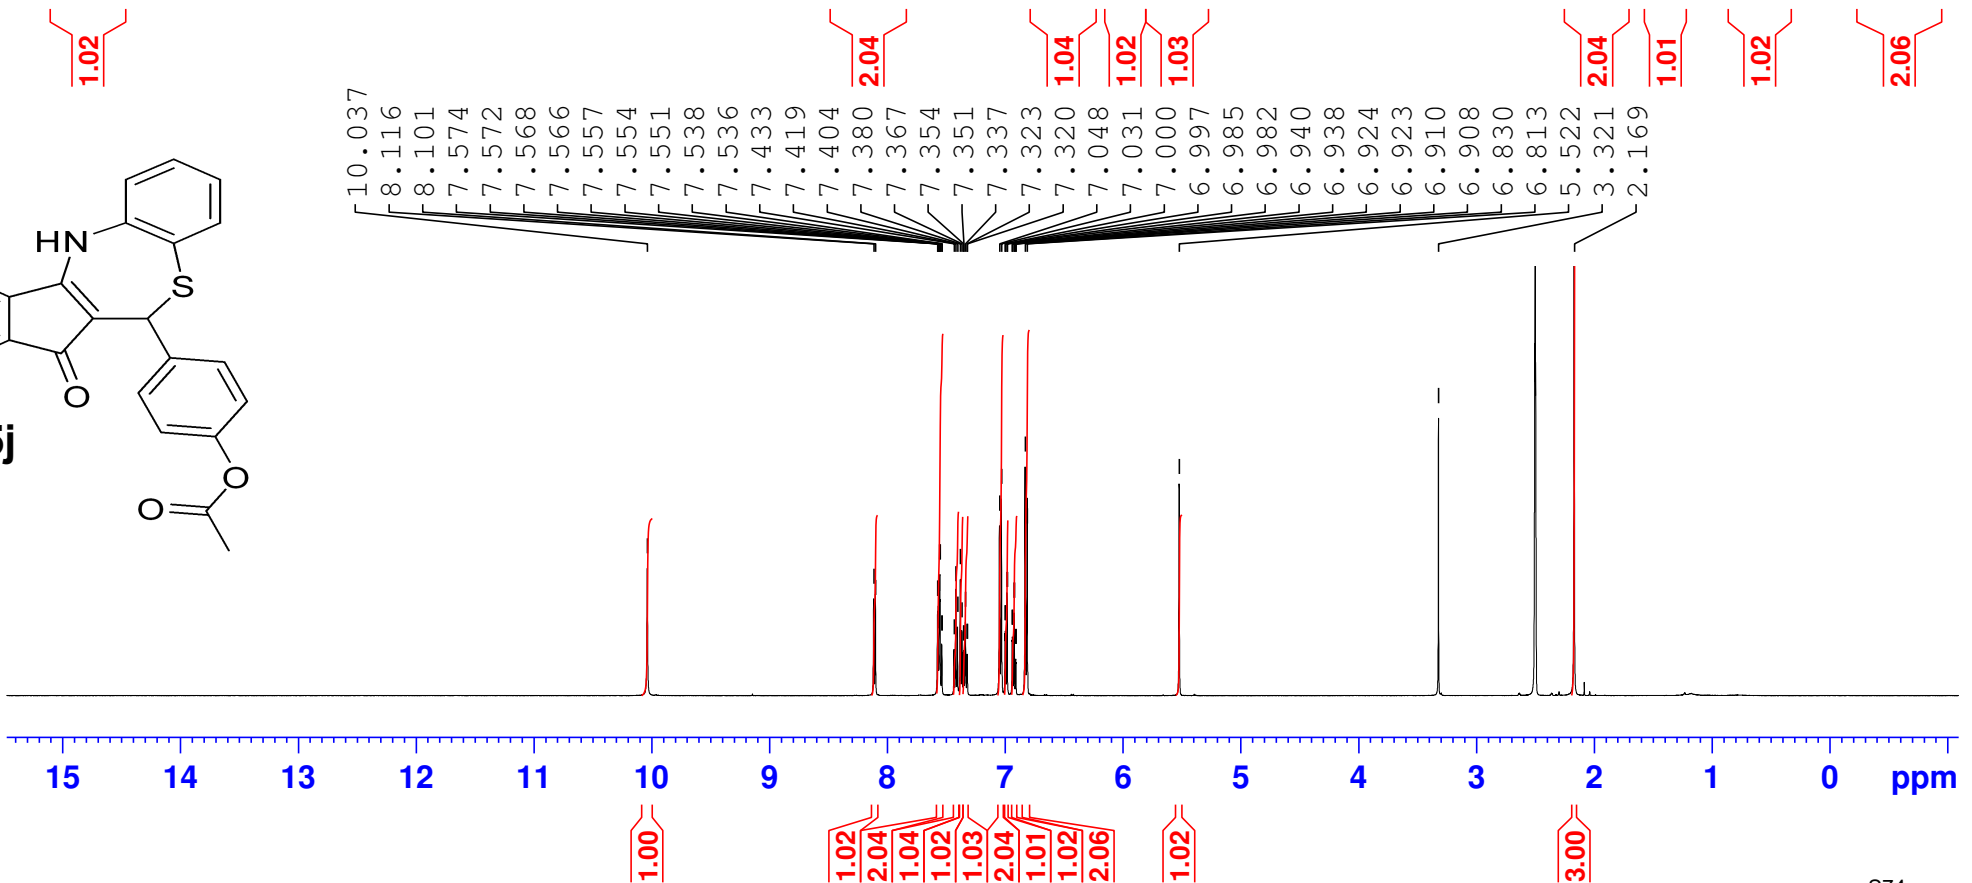

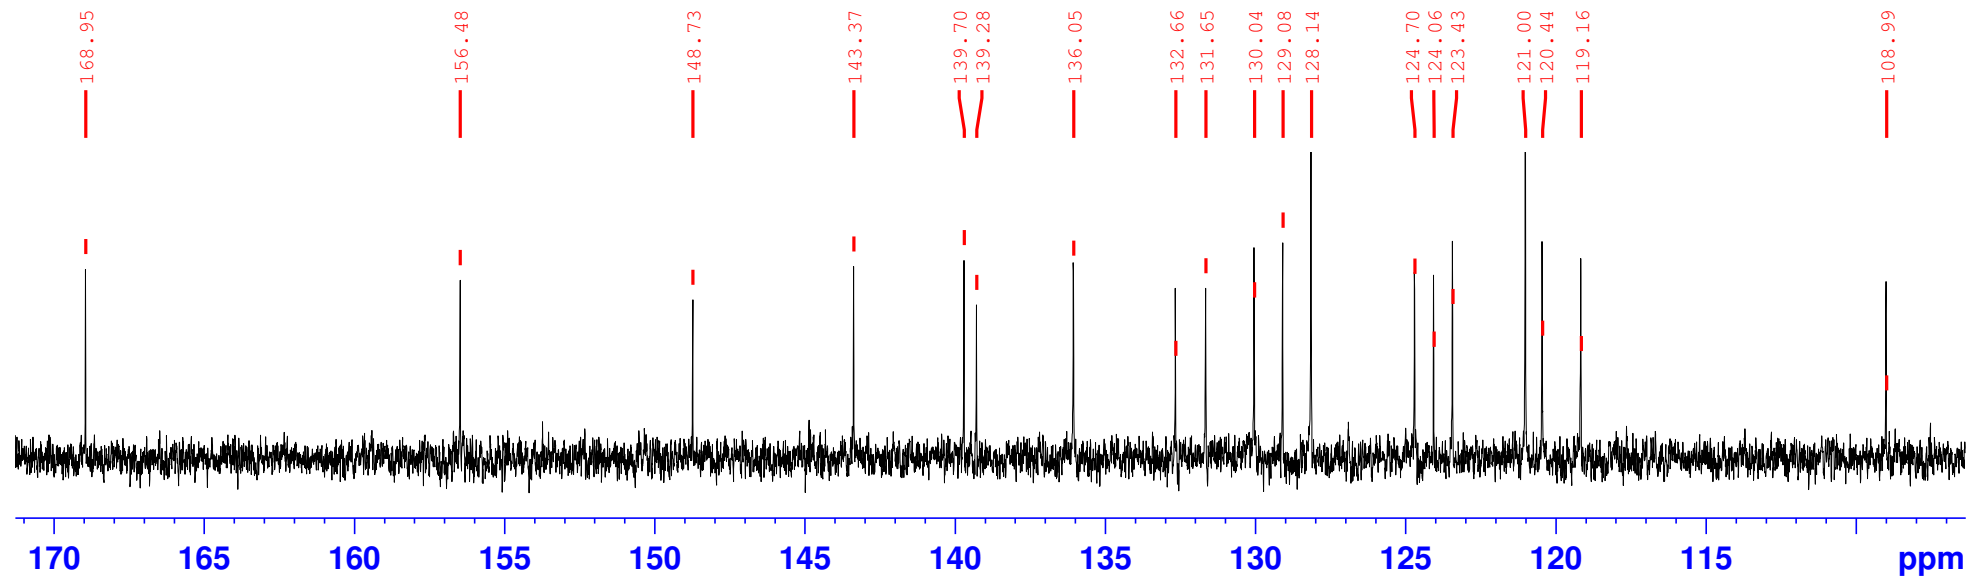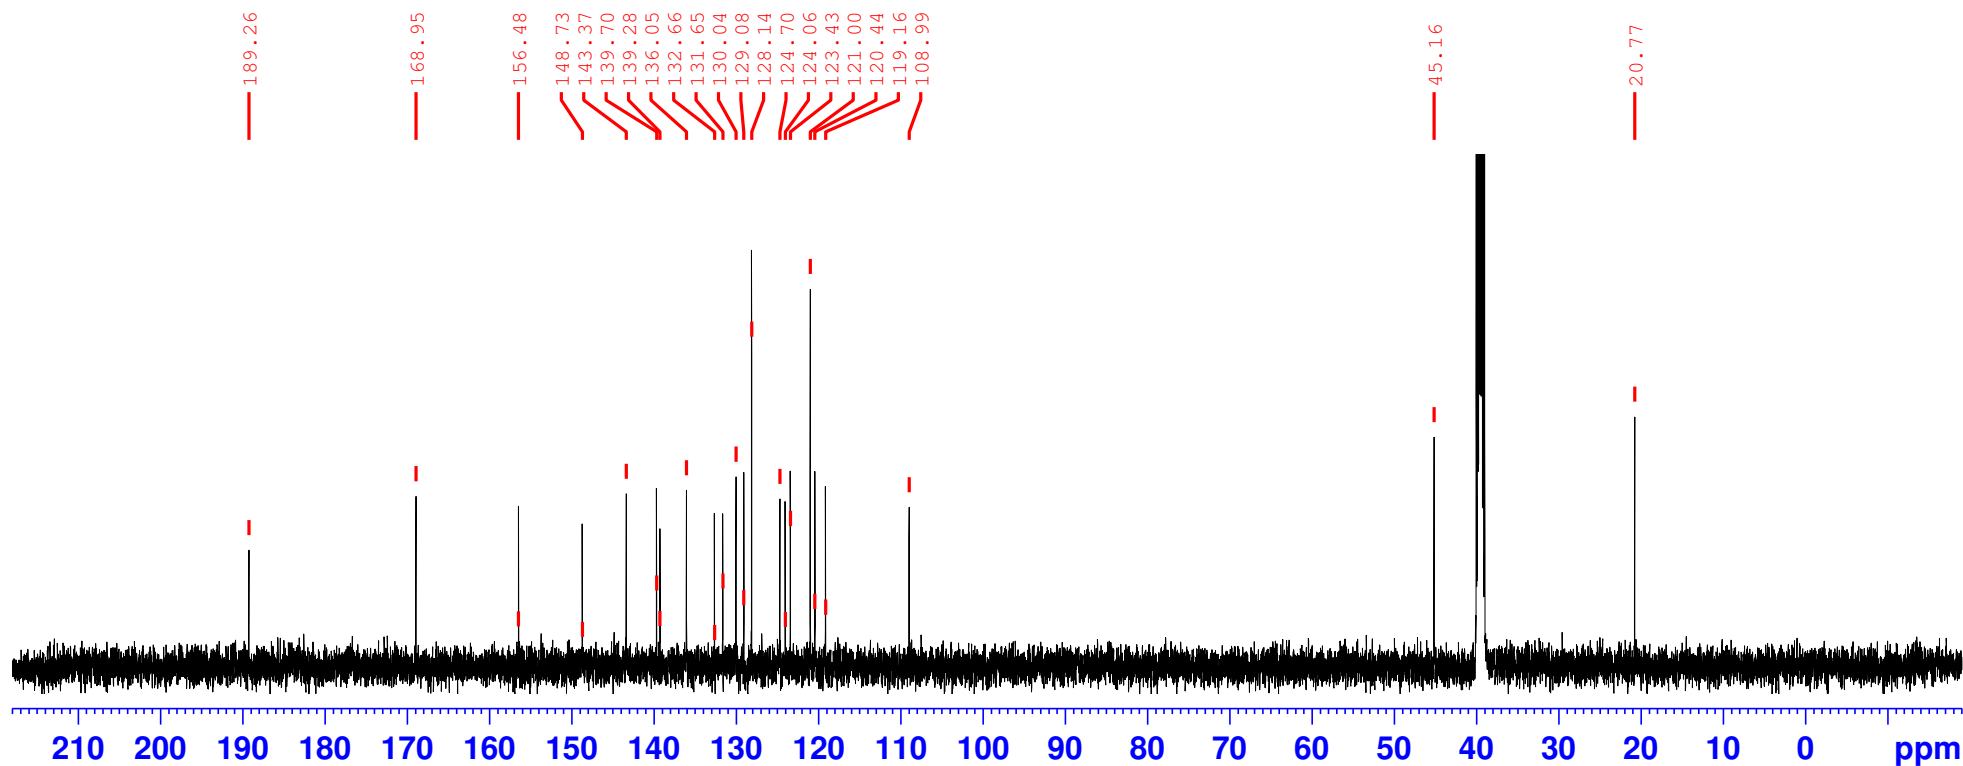

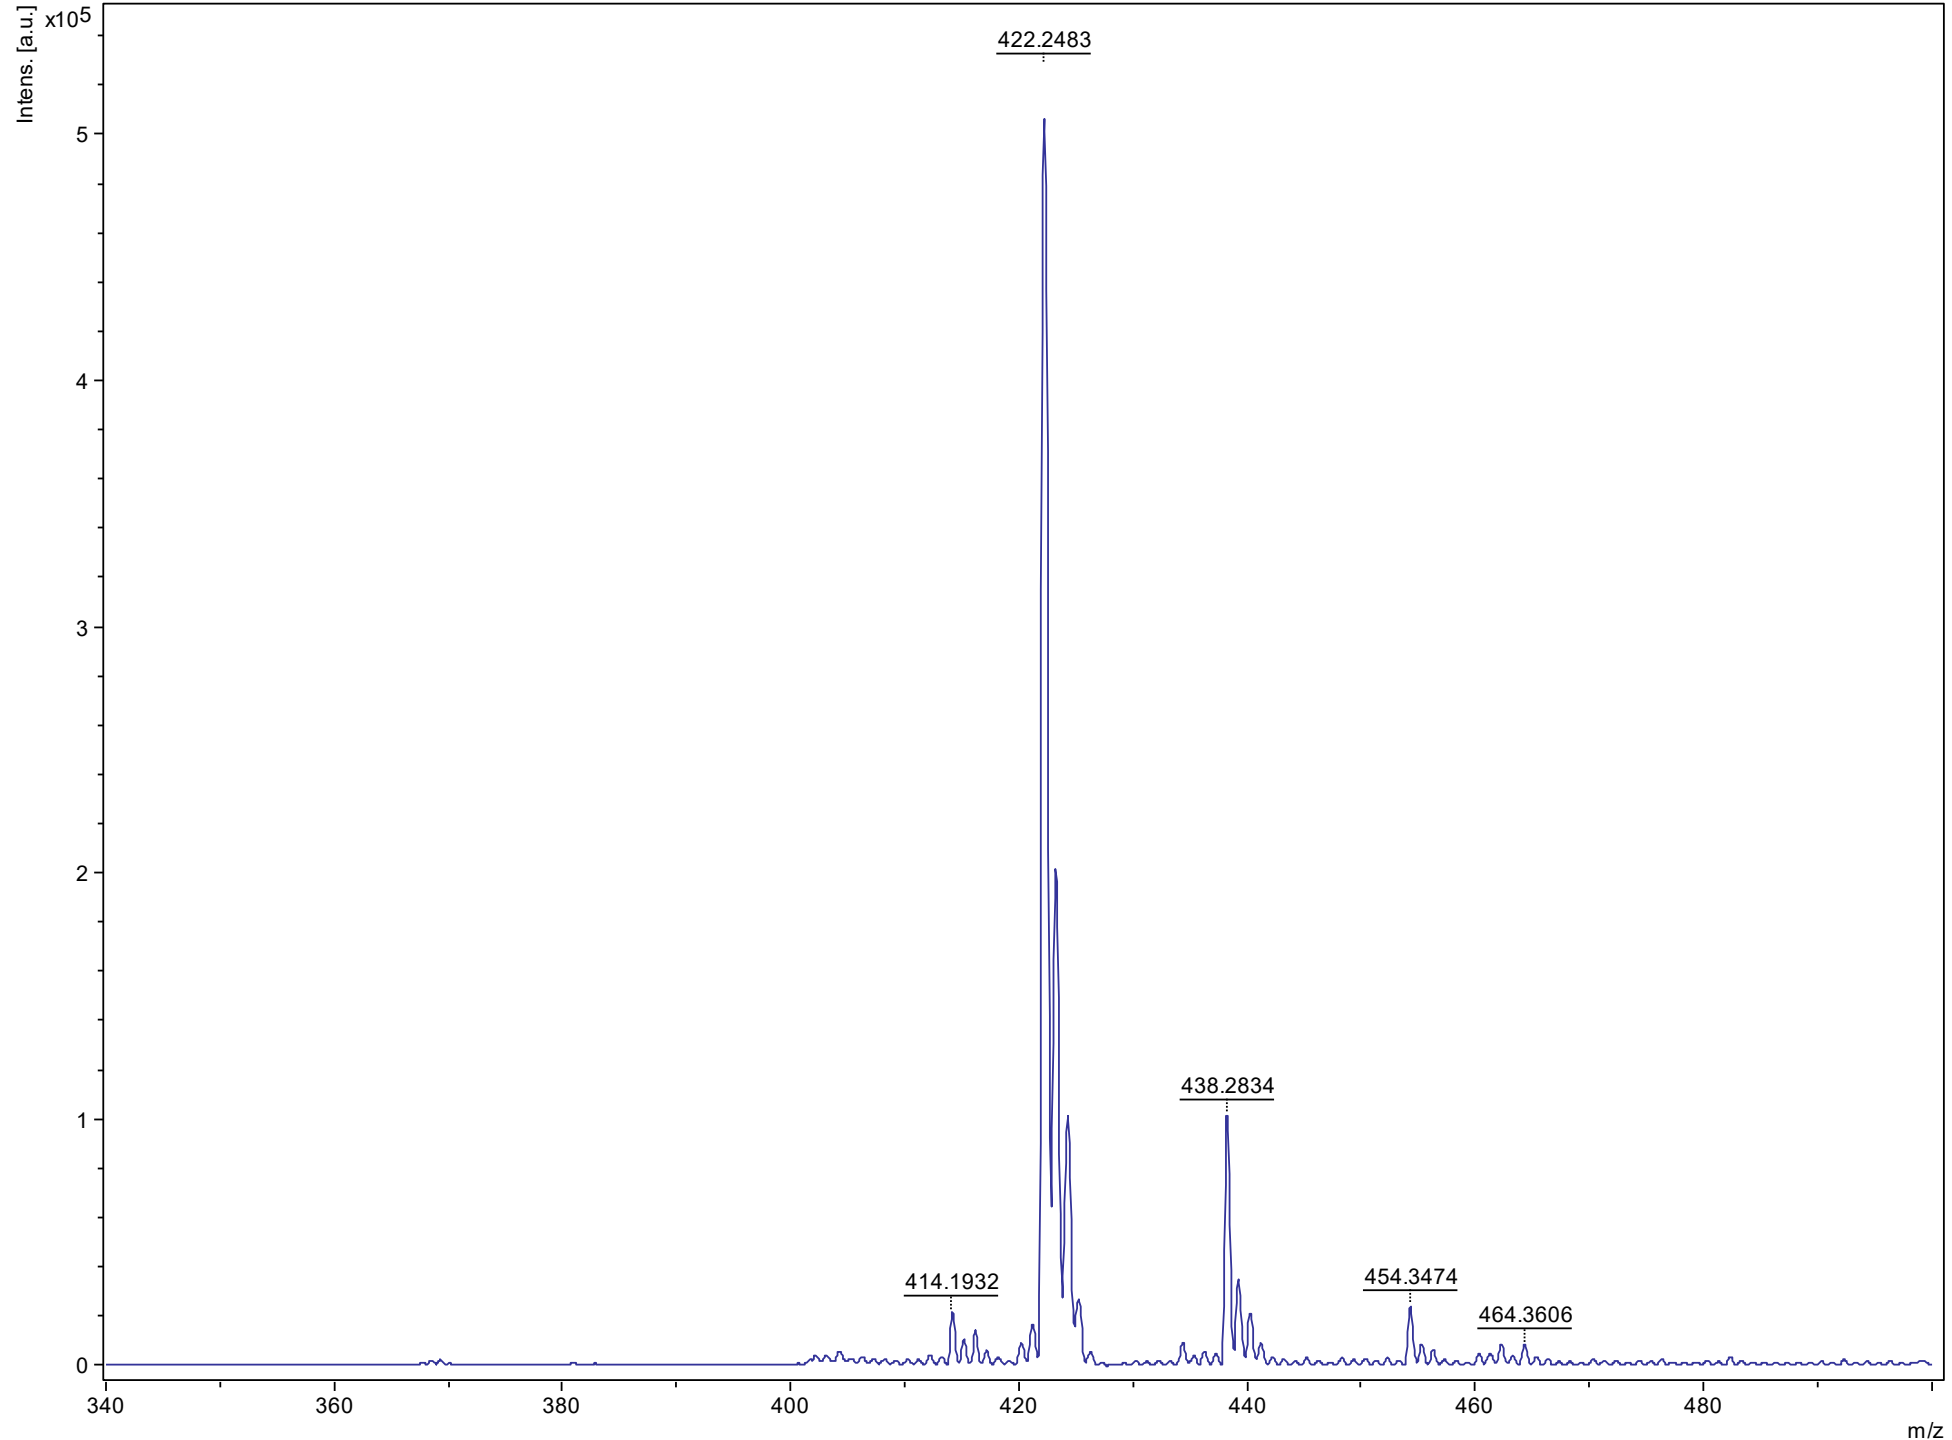

Sample Name: LJC 1-63

```

=====
Acq. Operator   : SYSTEM                      Seq. Line :    3
Acq. Instrument : 1220 HPLC                   Location  :    3
Injection Date  : 10/5/2020 3:48:36 PM      Inj       :    1
                                                Inj Volume: 30.000 µl
Different Inj Volume from Sample Entry! Actual Inj Volume : 50.000 µl
Method          : C:\Chem32\1\Data\luana 2020-10-05 14-53-23\MOHAMED-SMALL MOLECULE.M (
                Sequence Method)
Last changed    : 10/5/2020 2:58:07 PM by SYSTEM
Method Info     : Water/MeOH

Sample Info     : LJC 1-63
    
```

Additional Info : Peak(s) manually integrated

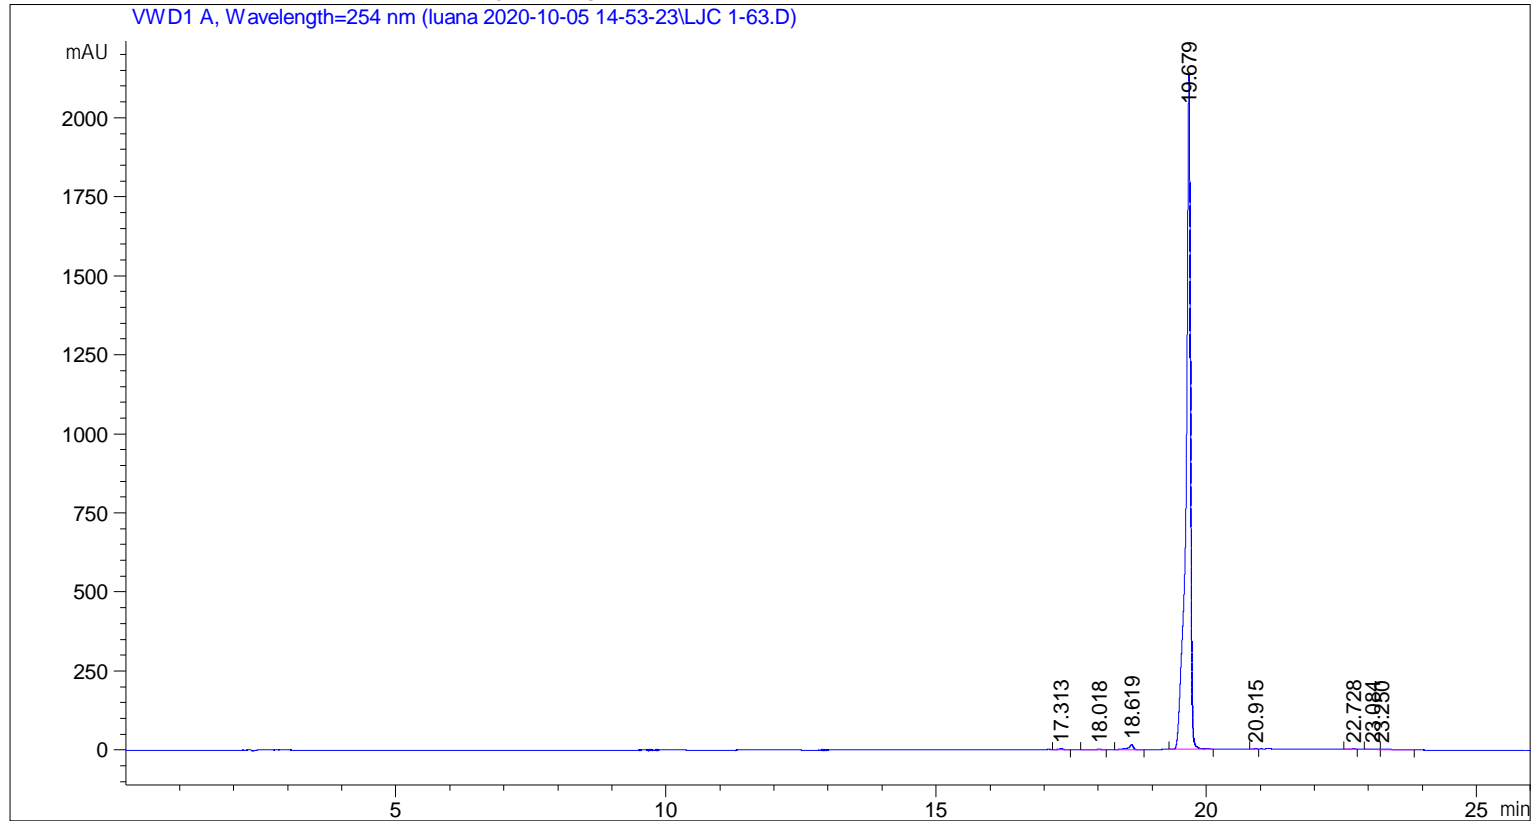

Area Percent Report

```

Sorted By      :      Signal
Multiplier     :      1.0000
Dilution       :      1.0000
Use Multiplier & Dilution Factor with ISTDs
    
```

Signal 1: VWD1 A, Wavelength=254 nm

| Peak # | RetTime [min] | Type | Width [min] | Area [mAU*s] | Height [mAU] | Area %  |
|--------|---------------|------|-------------|--------------|--------------|---------|
| 1      | 17.313        | VB   | 0.0849      | 26.59534     | 4.31320      | 0.2114  |
| 2      | 18.018        | BV   | 0.0954      | 13.68562     | 2.01119      | 0.1088  |
| 3      | 18.619        | BV R | 0.0921      | 108.80461    | 16.35528     | 0.8649  |
| 4      | 19.679        | BV R | 0.0815      | 1.23551e4    | 2134.36719   | 98.2076 |

| Peak # | RetTime [min] | Type | Width [min] | Area [mAU*s] | Height [mAU] | Area % |
|--------|---------------|------|-------------|--------------|--------------|--------|
| 5      | 20.915        | VV   | 0.0822      | 12.76791     | 2.10826      | 0.1015 |
| 6      | 22.728        | BV   | 0.0756      | 11.00524     | 1.88531      | 0.0875 |
| 7      | 23.084        | VV   | 0.1904      | 28.53626     | 1.76667      | 0.2268 |
| 8      | 23.250        | VB   | 0.1524      | 24.09718     | 1.87609      | 0.1915 |

Totals : 1.25806e4 2164.68319

=====  
\*\*\* End of Report \*\*\*

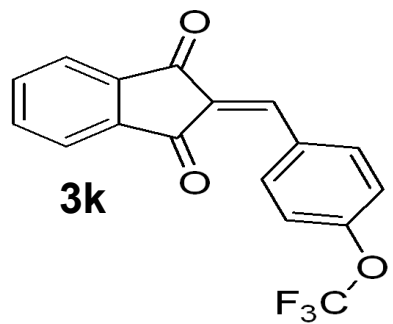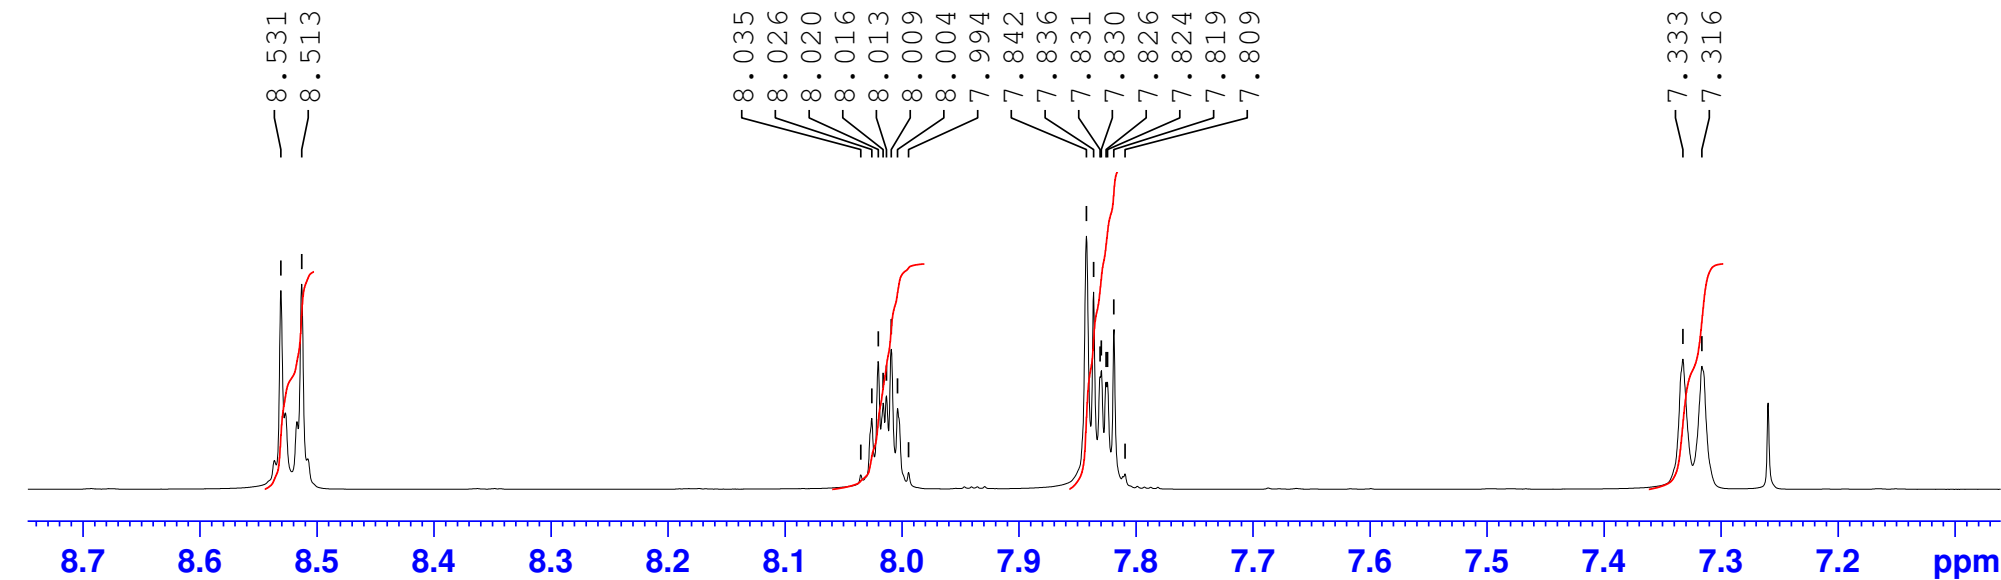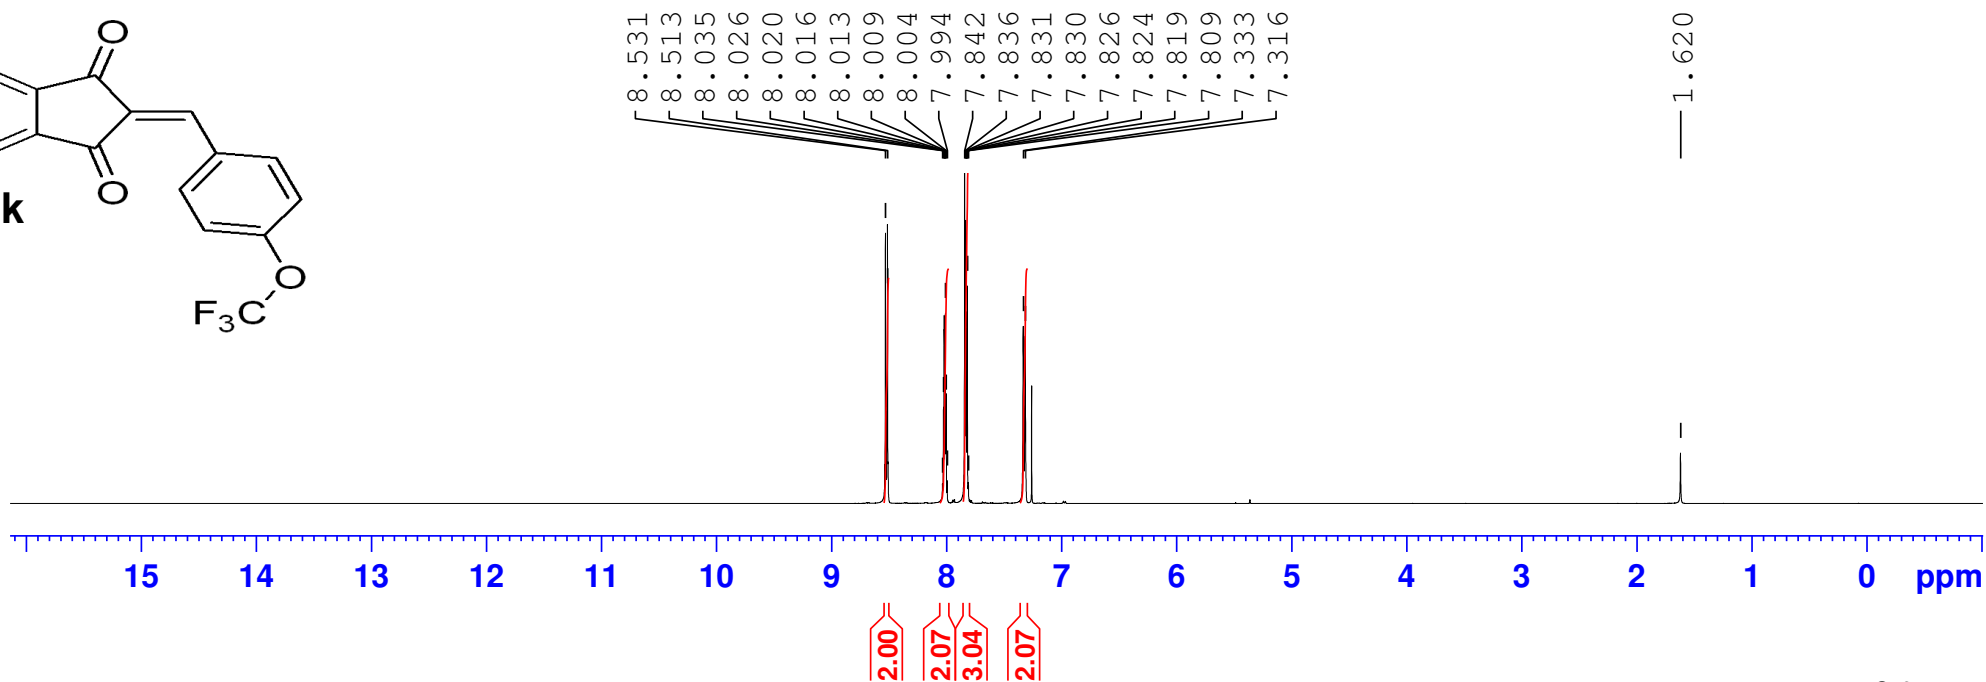

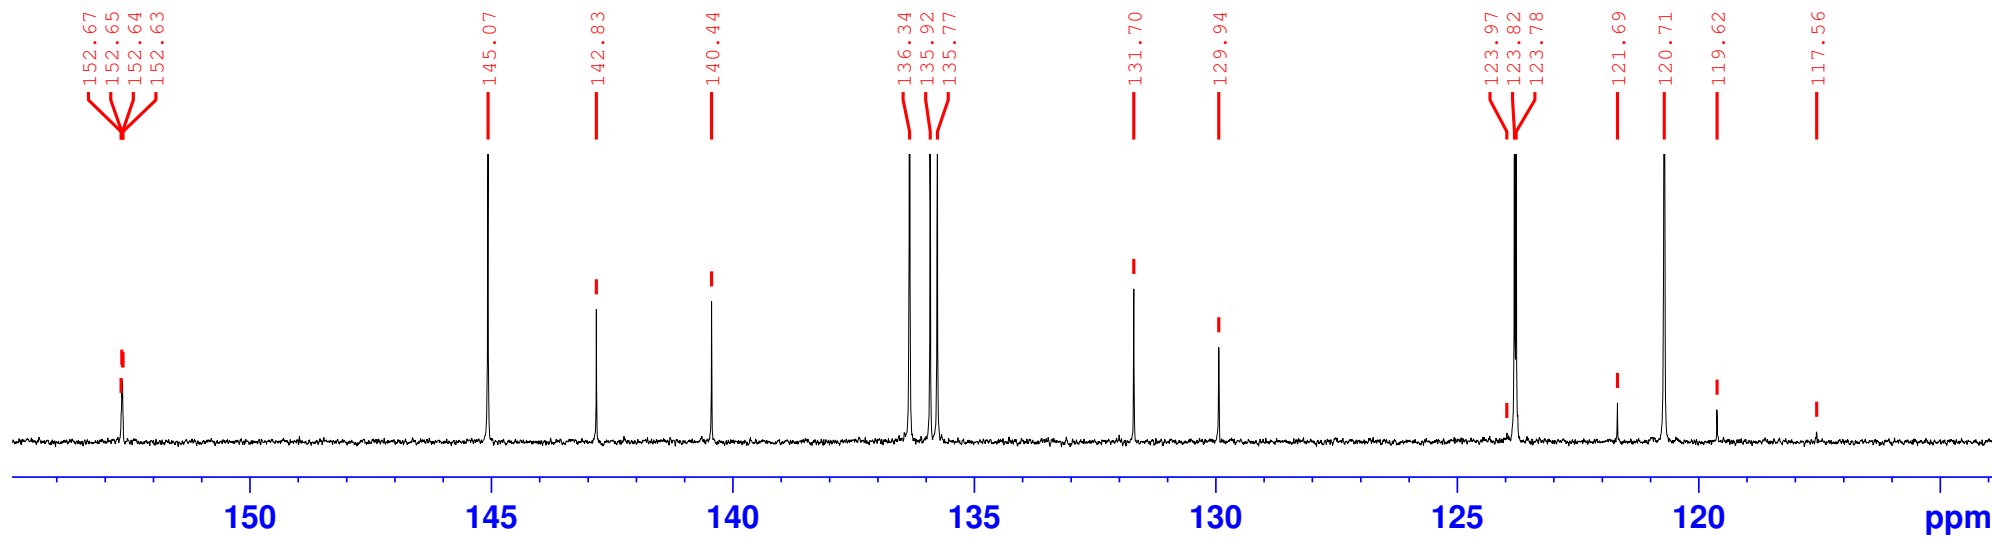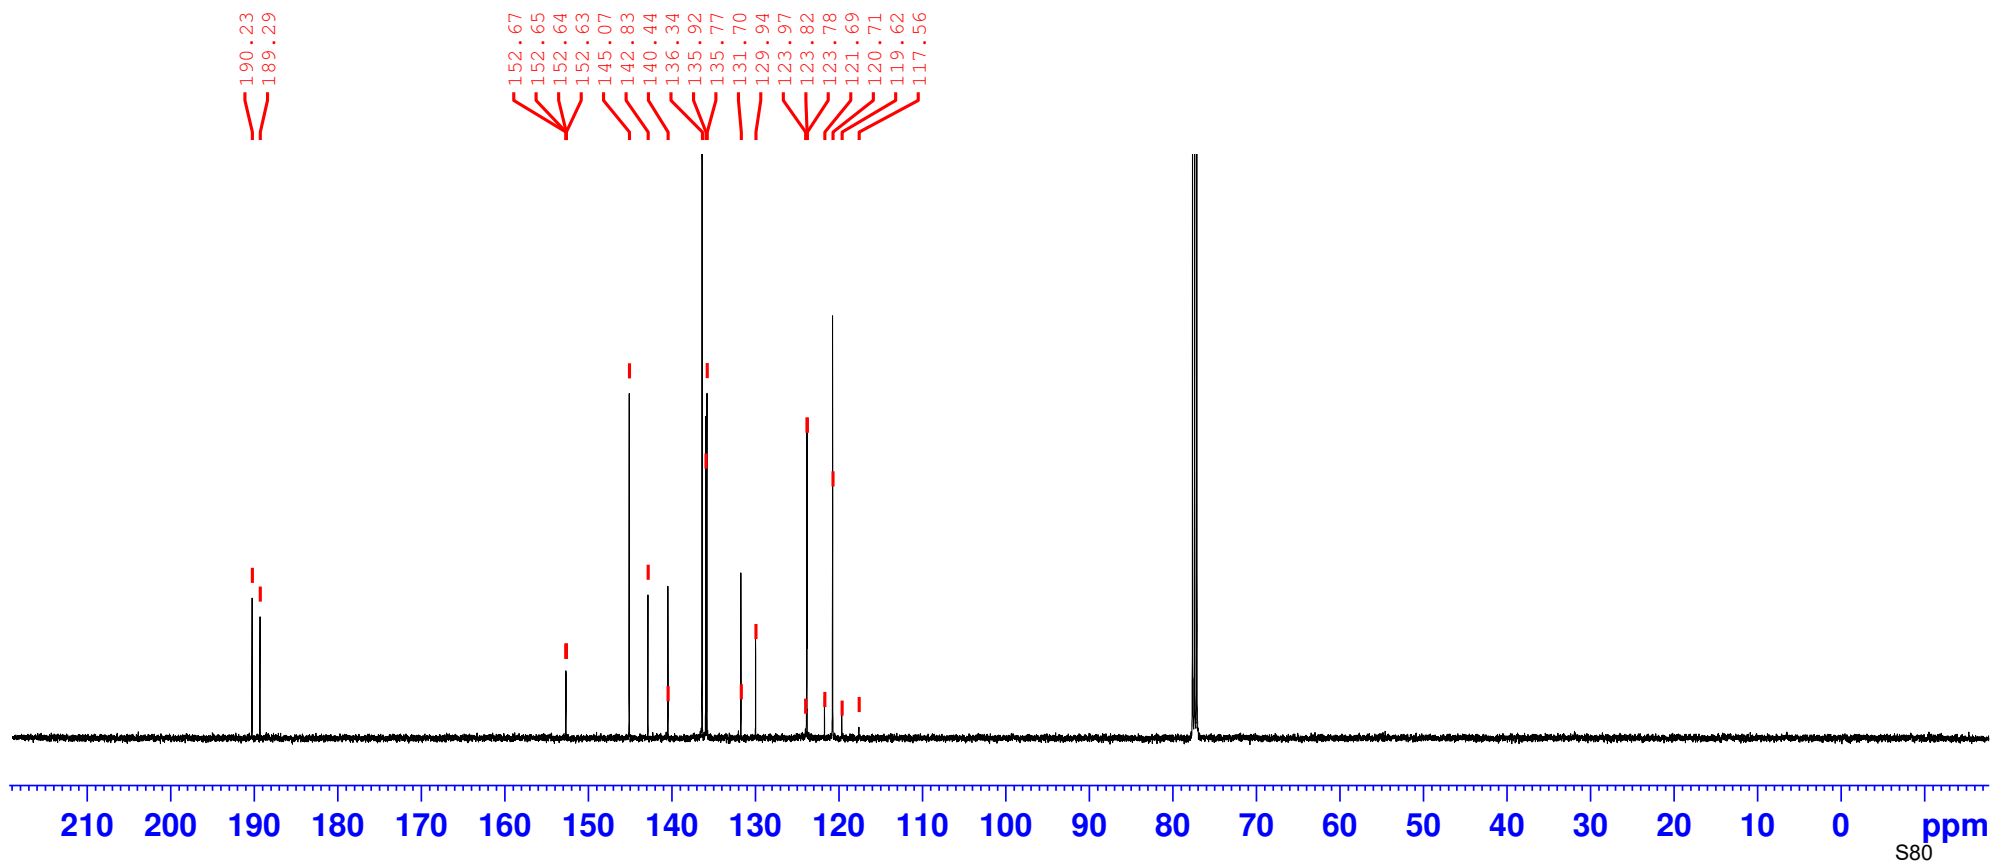



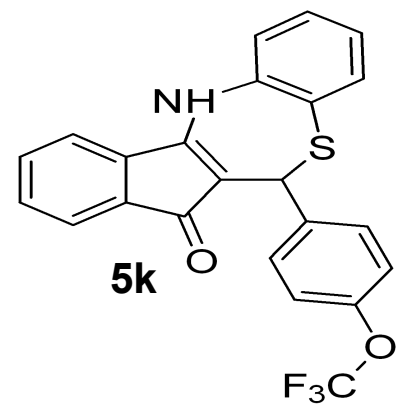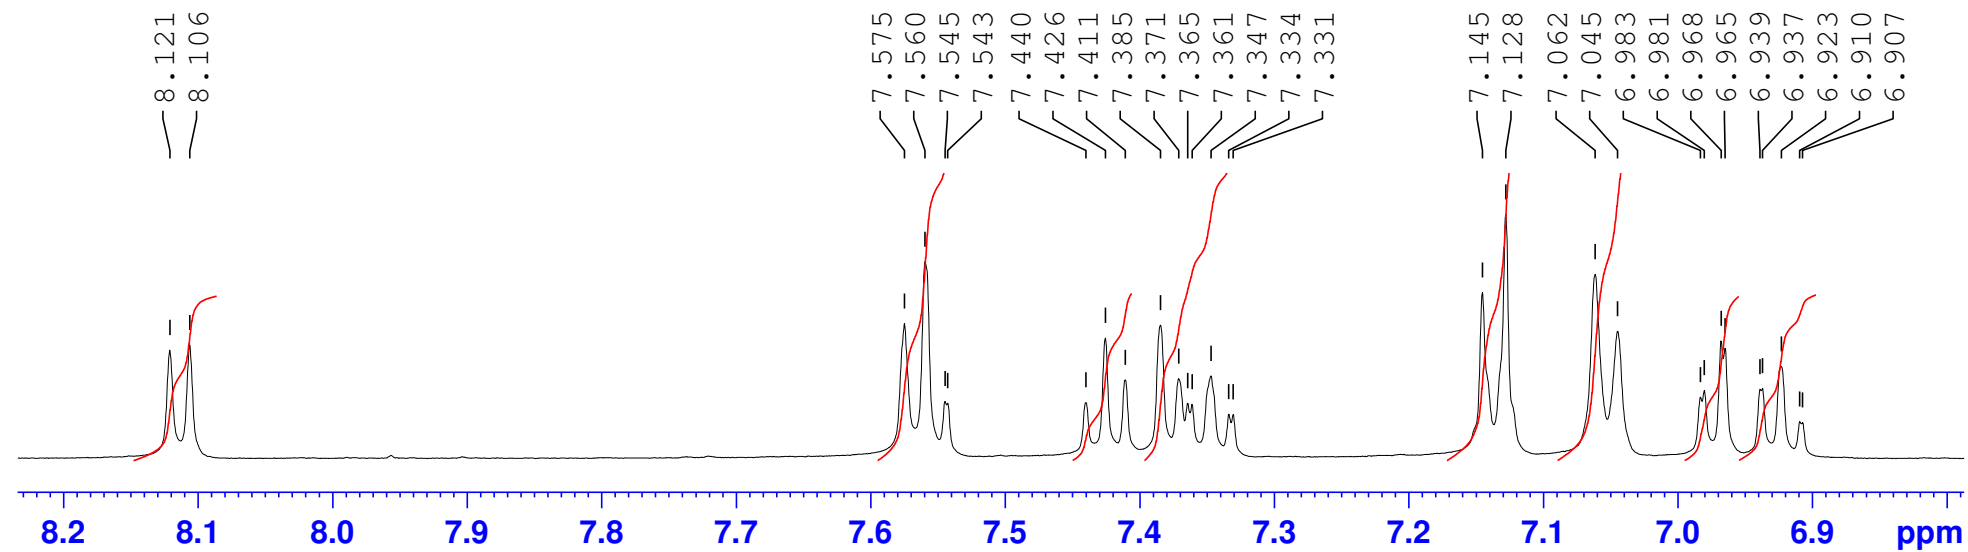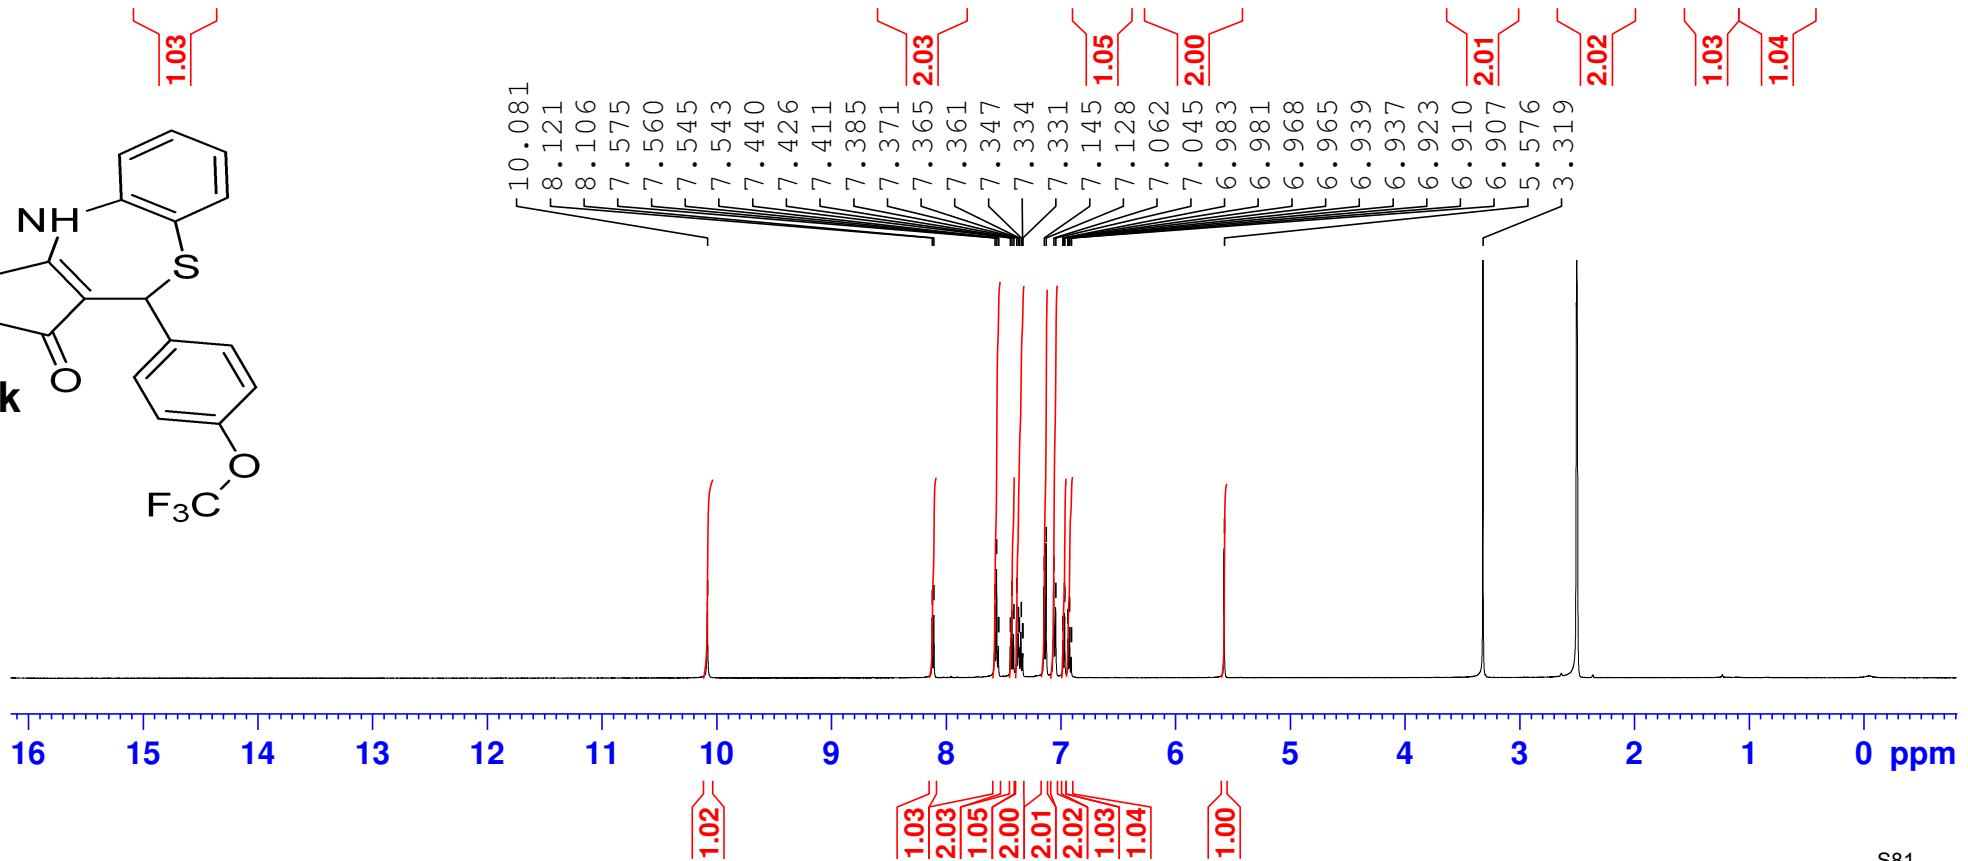

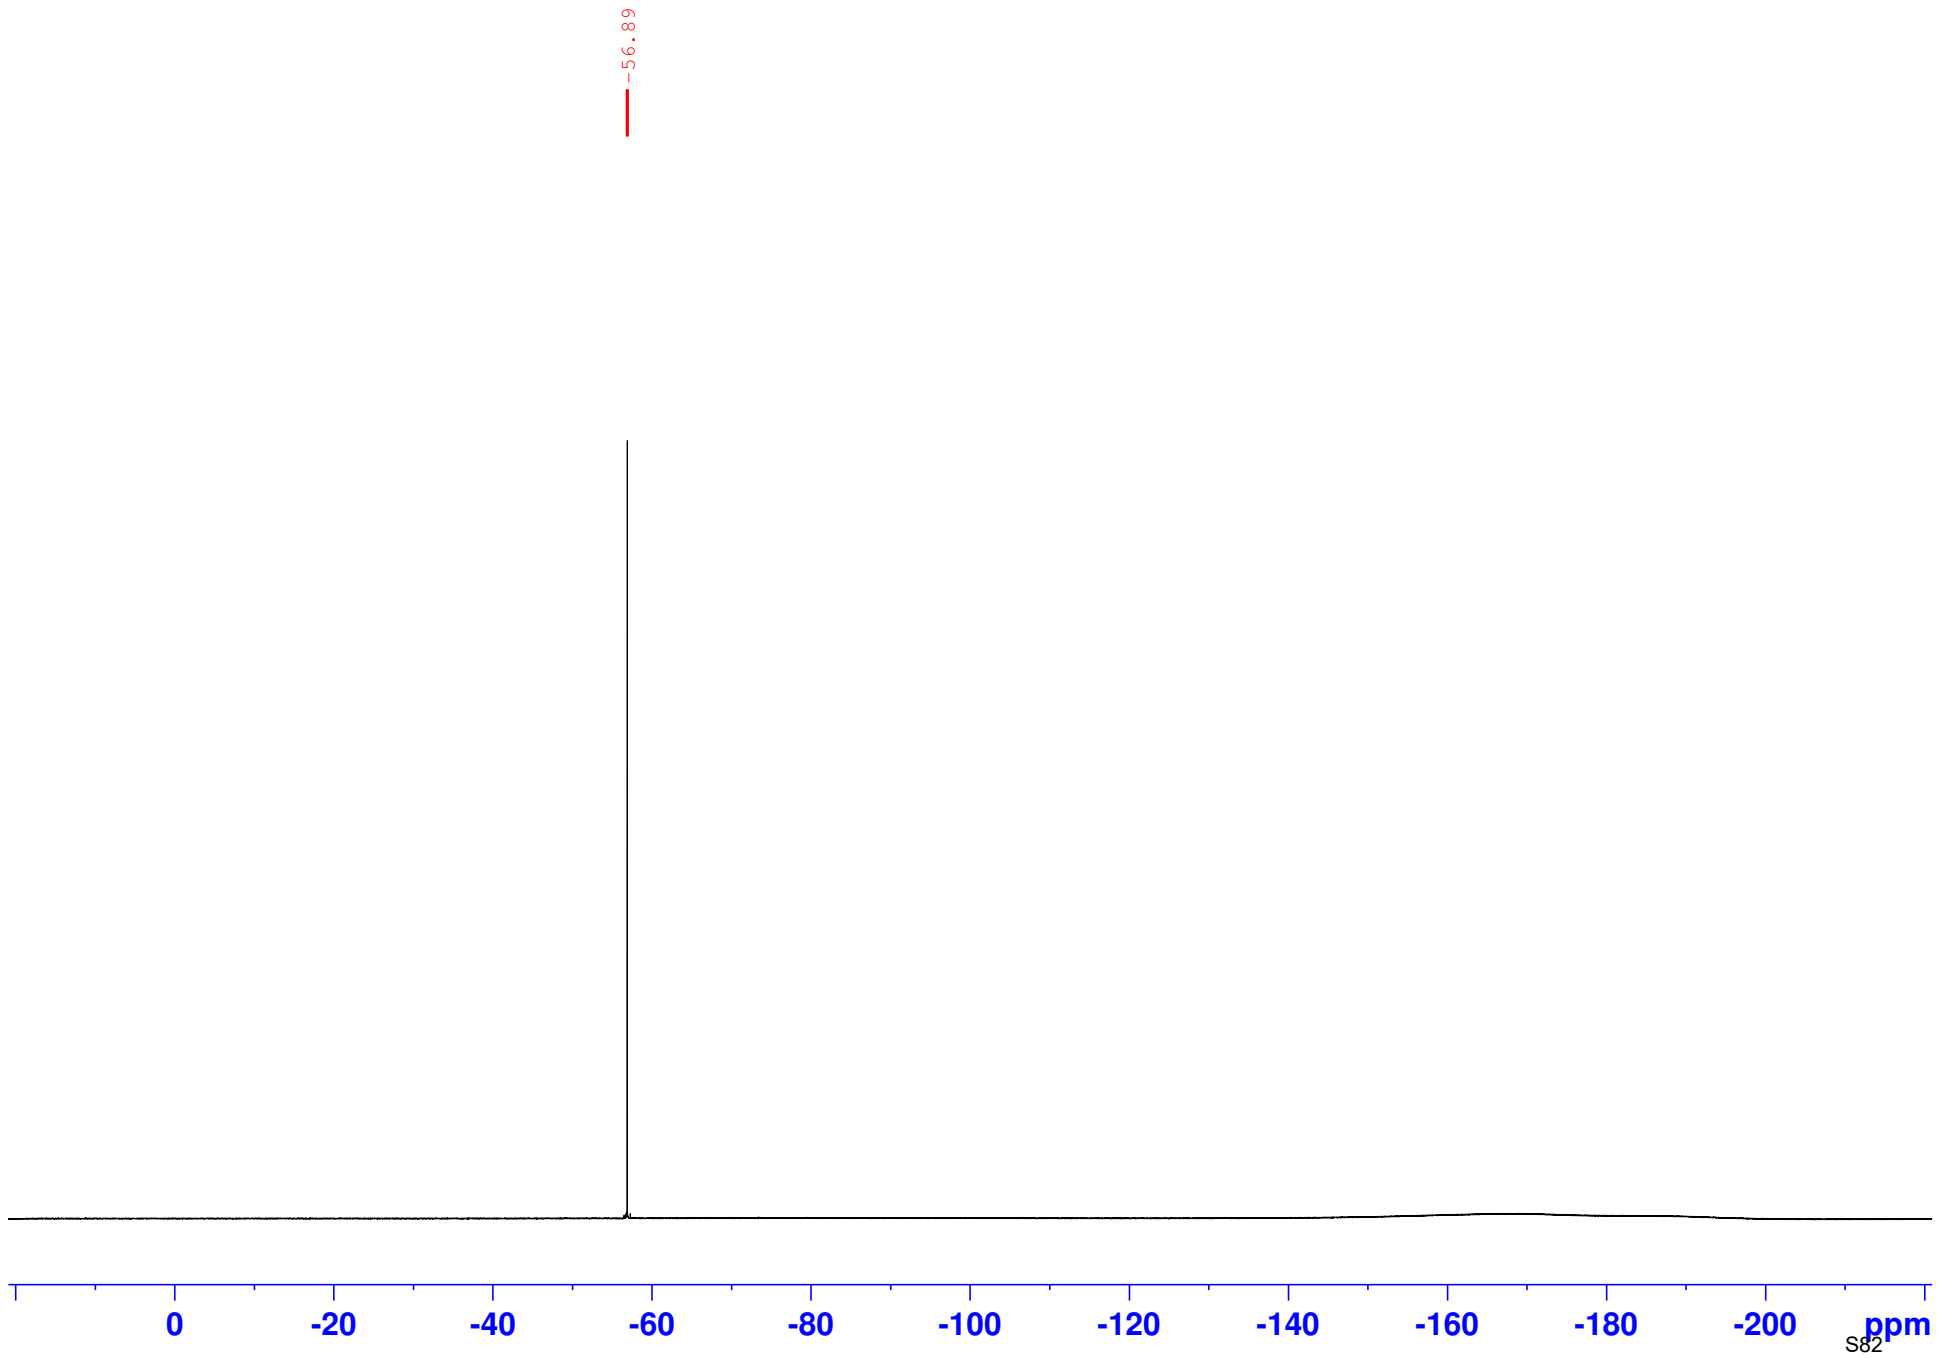

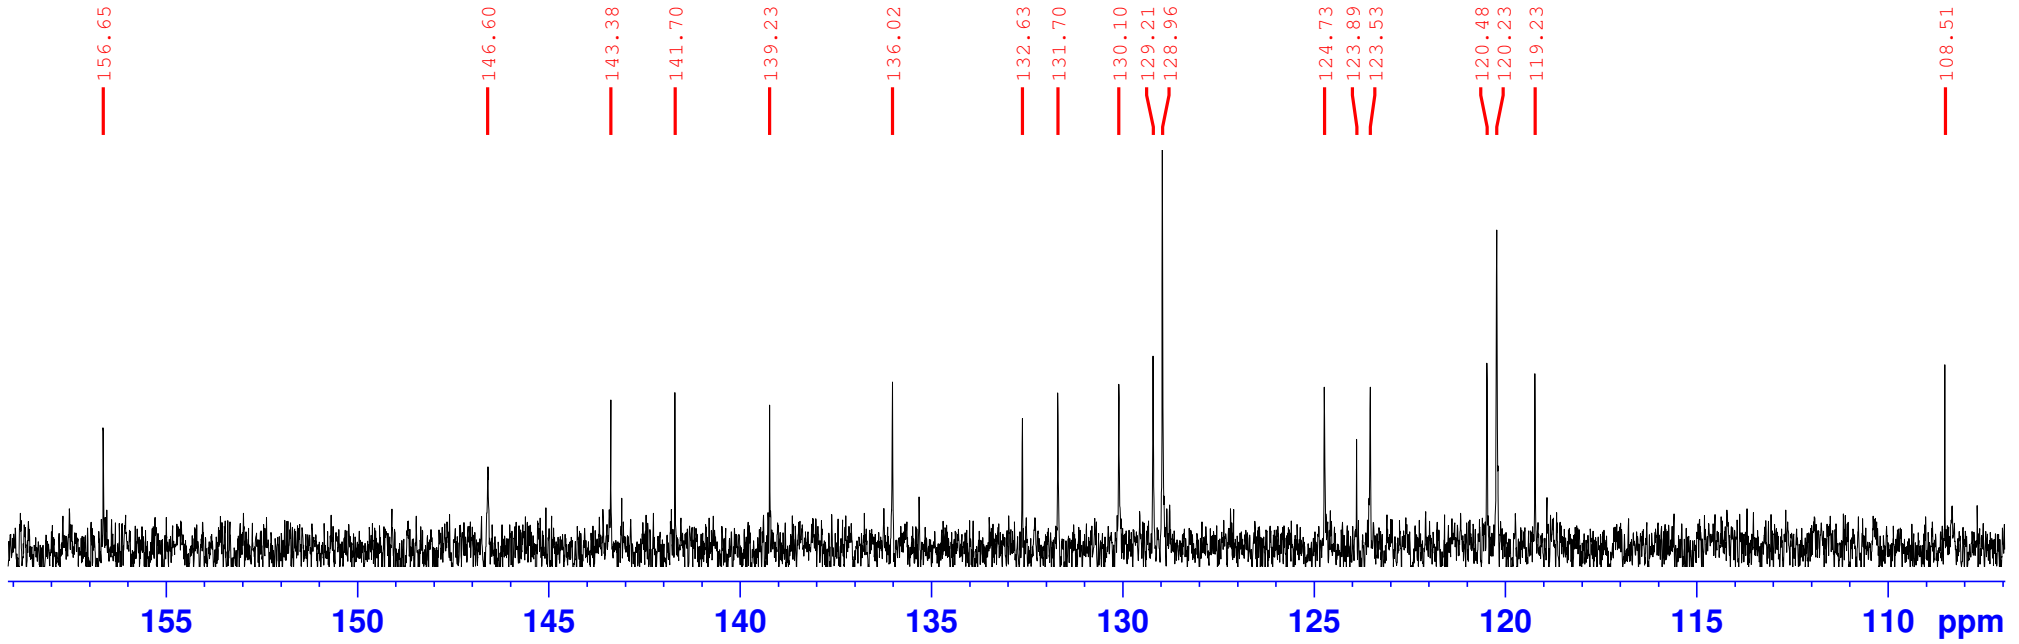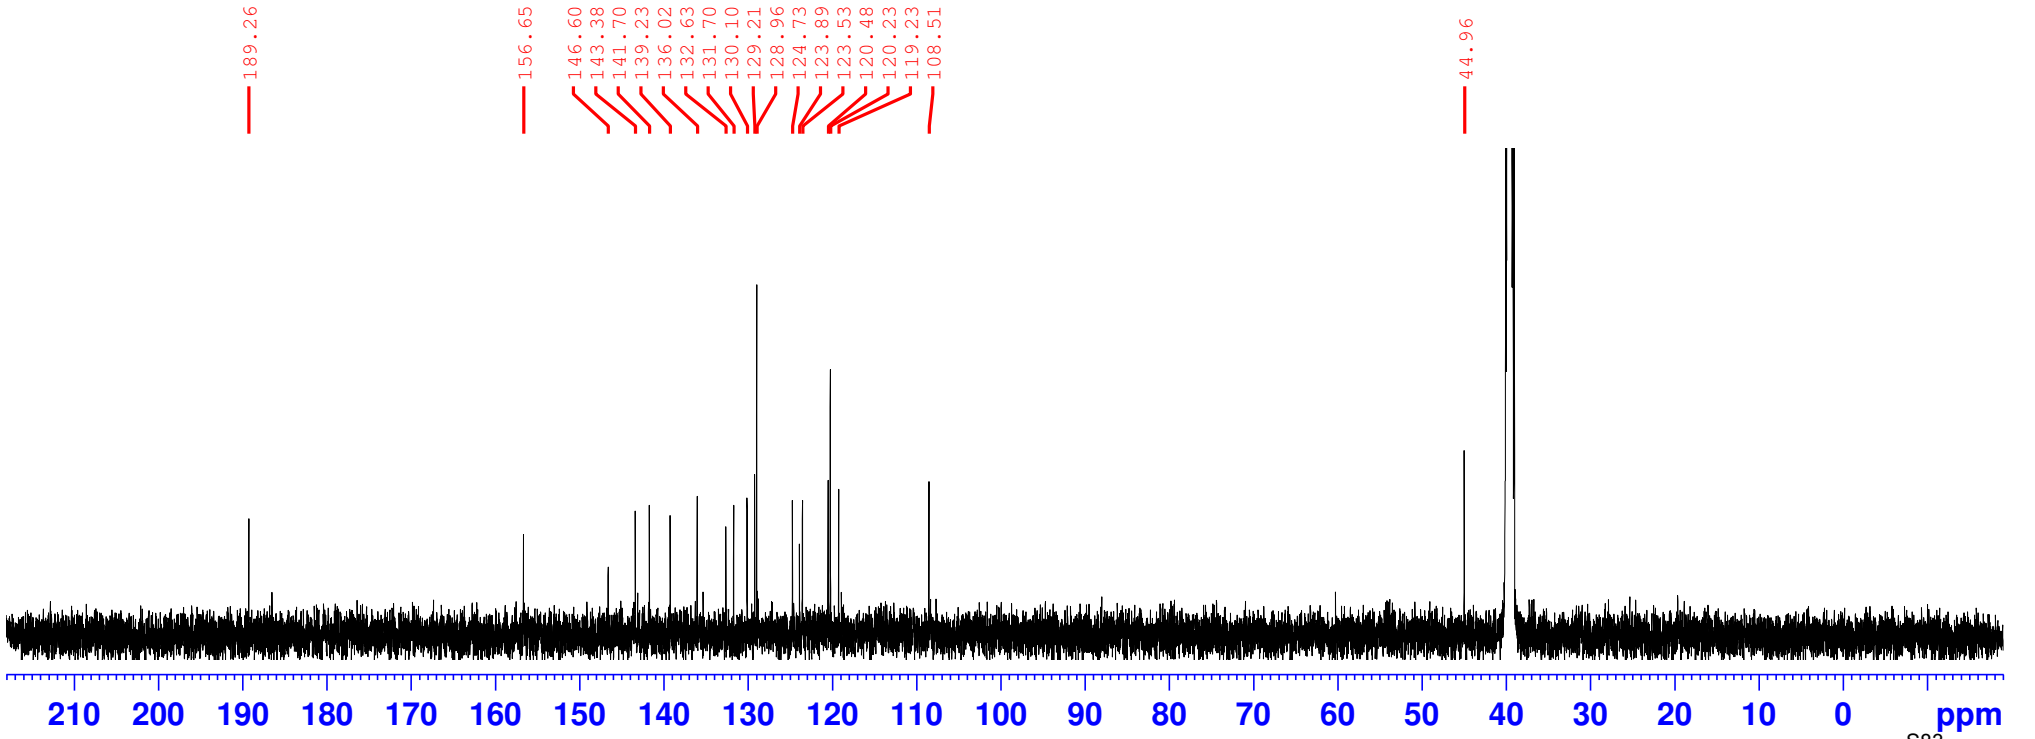

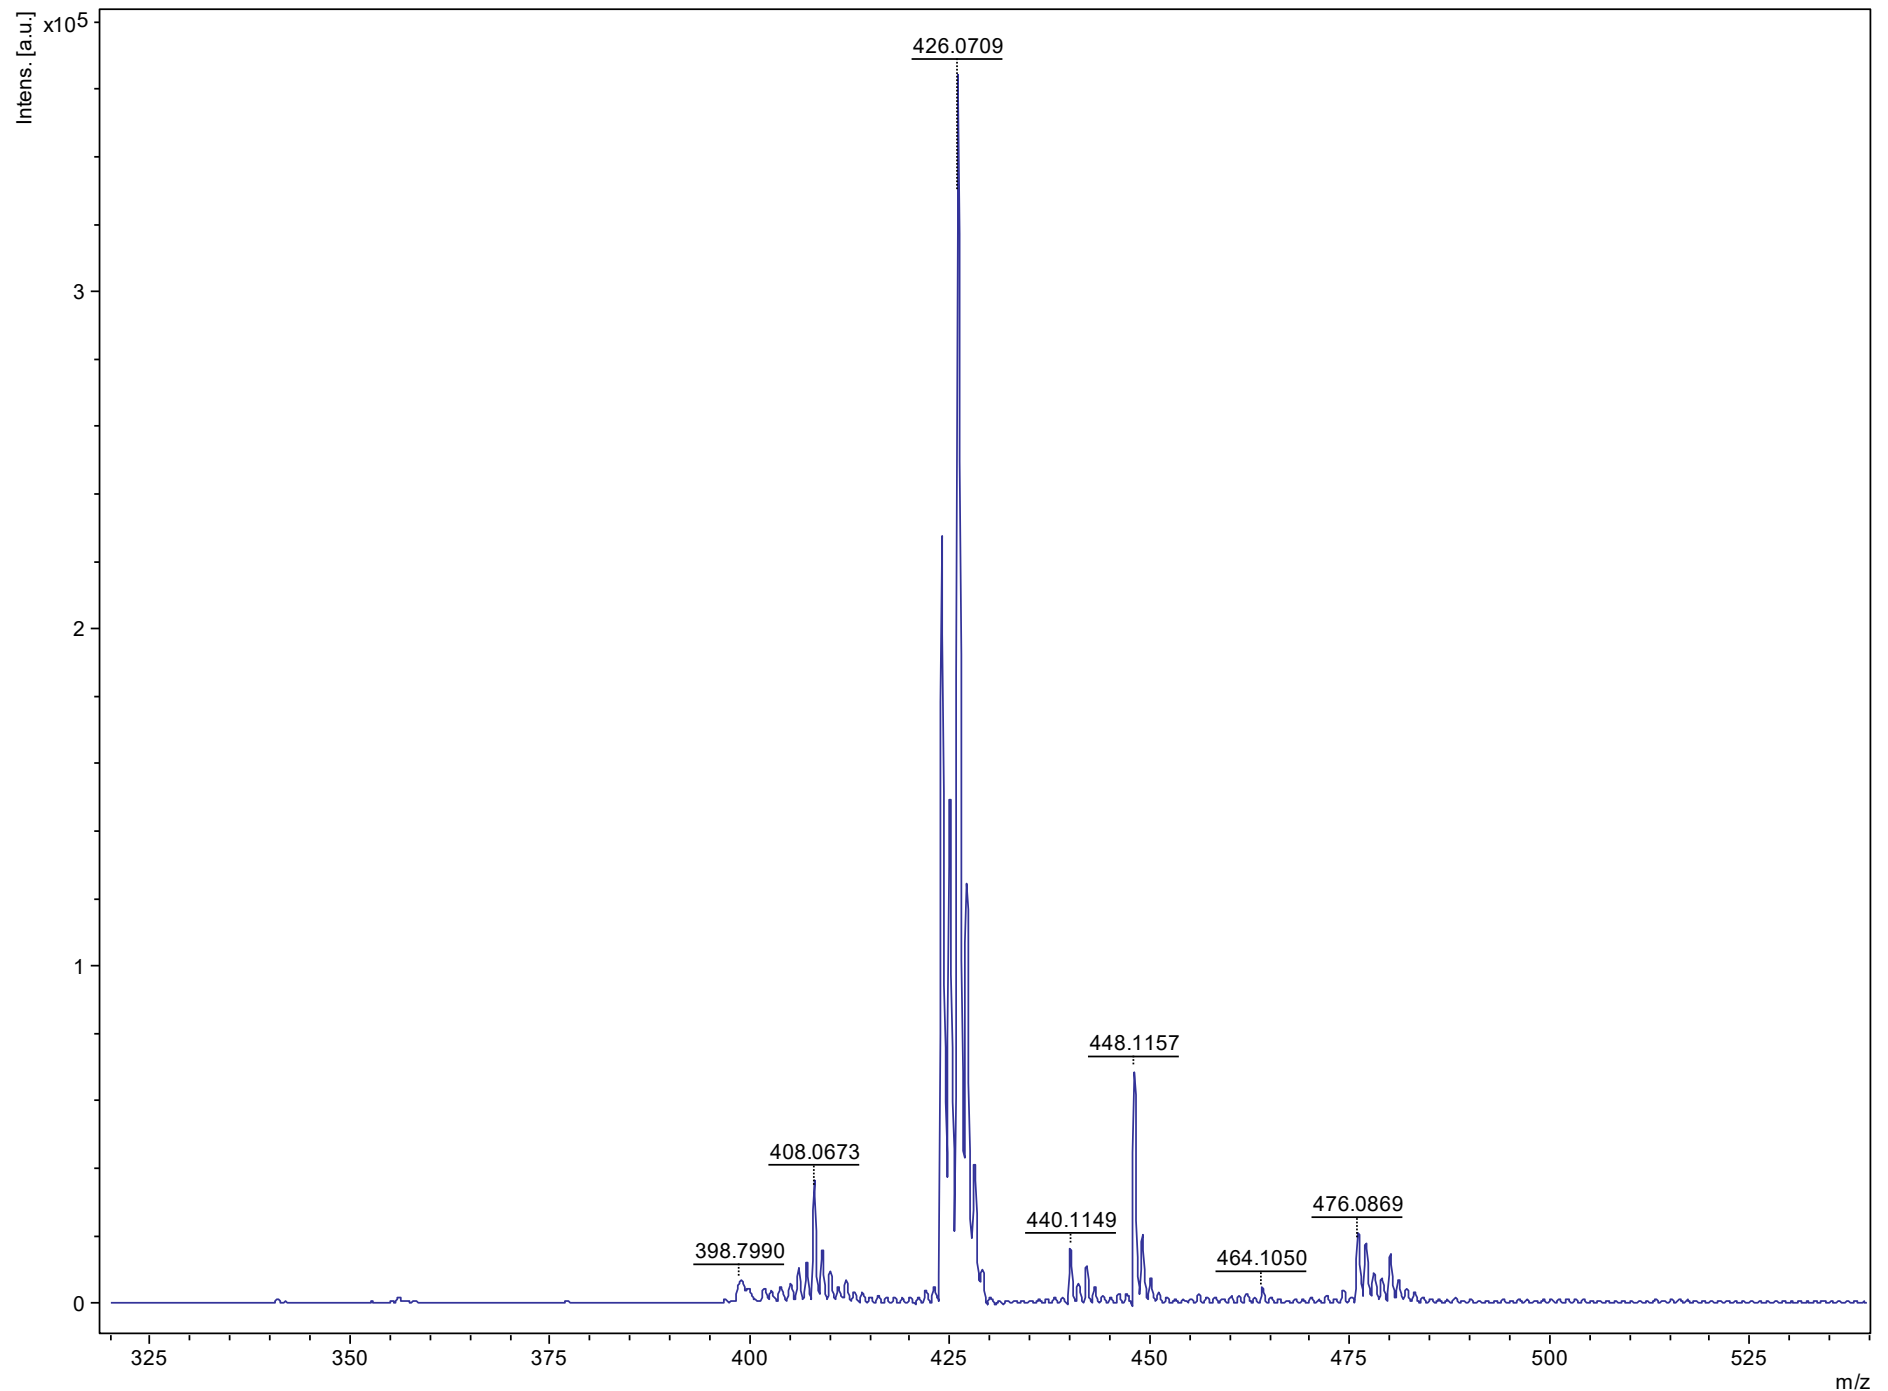

Sample Name: LJC 1-6

```

=====
Acq. Operator   : SYSTEM                               Seq. Line :    1
Acq. Instrument : 1220 HPLC                            Location  :   81
Injection Date  : 10/13/2022 10:14:32 AM              Inj       :    1
                                                    Inj Volume: 70.000 µl
Different Inj Volume from Sample Entry! Actual Inj Volume : 50.000 µl
Method          : C:\Chem32\1\Data\luana 2022-10-13 10-13-01\Luana_small_molecule.M (Sequence
                Method)
Last changed    : 10/13/2022 10:13:06 AM by SYSTEM
Method Info     : MeOH/water

Sample Info     : LJC 1-6
    
```

Additional Info : Peak(s) manually integrated

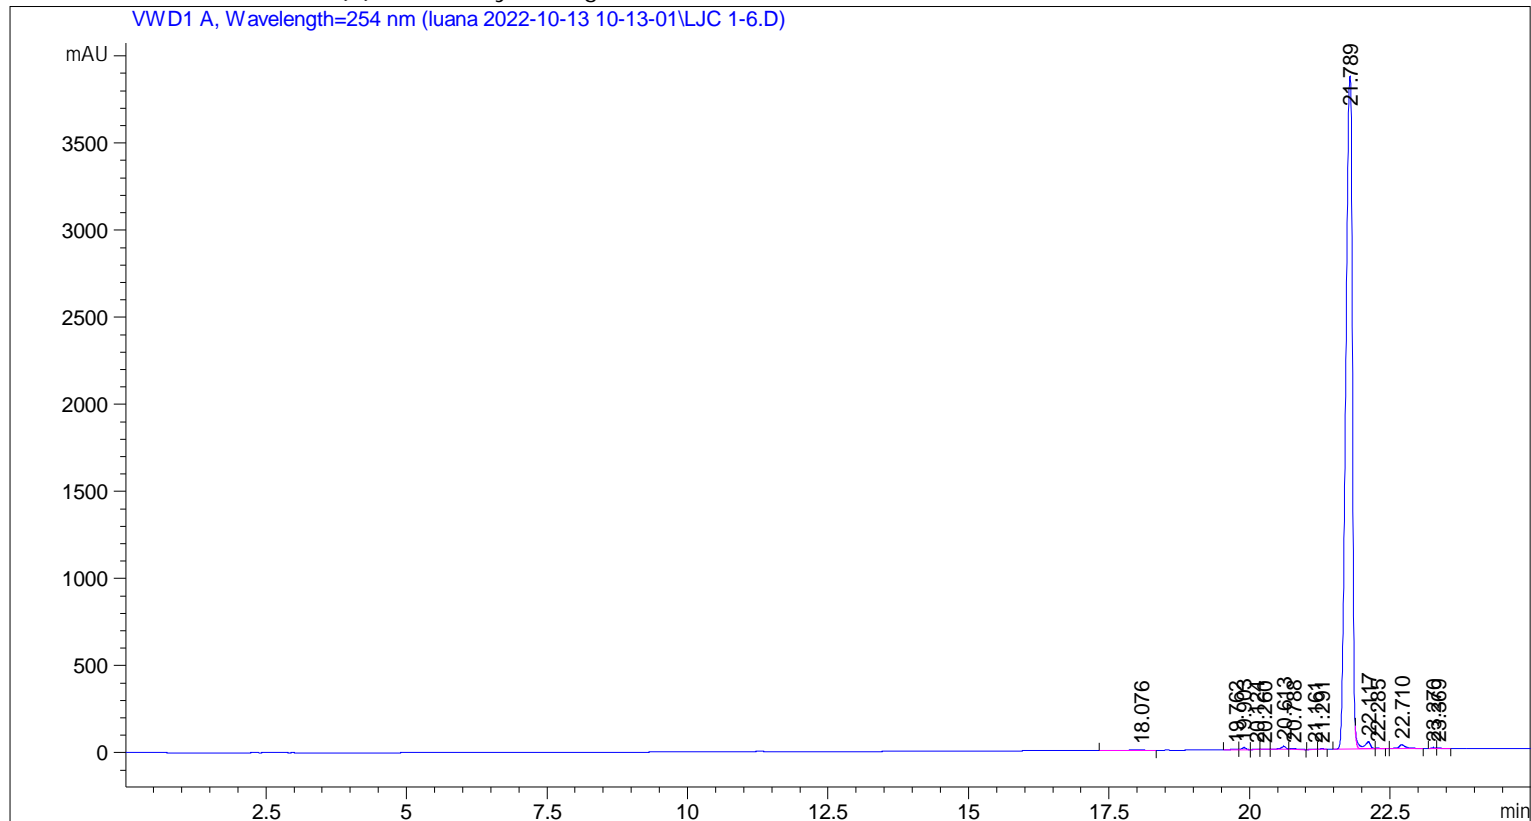

Area Percent Report

```

Sorted By      :      Signal
Multiplier     :      1.0000
Dilution       :      1.0000
Use Multiplier & Dilution Factor with ISTDs
    
```

Signal 1: VWD1 A, Wavelength=254 nm

| Peak # | RetTime [min] | Type | Width [min] | Area [mAU*s] | Height [mAU] | Area % |
|--------|---------------|------|-------------|--------------|--------------|--------|
| 1      | 18.076        | VV R | 0.2002      | 54.79712     | 3.48981      | 0.1709 |
| 2      | 19.762        | BV   | 0.1113      | 36.27752     | 4.58555      | 0.1131 |
| 3      | 19.903        | VB   | 0.0777      | 63.20223     | 12.14047     | 0.1971 |
| 4      | 20.124        | BV   | 0.0755      | 16.75923     | 3.33963      | 0.0523 |

Sample Name: LJC 1-6

| Peak # | RetTime [min] | Type | Width [min] | Area [mAU*s] | Height [mAU] | Area %  |
|--------|---------------|------|-------------|--------------|--------------|---------|
| 5      | 20.260        | VB   | 0.0883      | 12.79254     | 2.06380      | 0.0399  |
| 6      | 20.613        | BV   | 0.0949      | 121.01133    | 18.12976     | 0.3774  |
| 7      | 20.788        | VB   | 0.1076      | 47.65682     | 6.06828      | 0.1486  |
| 8      | 21.161        | BV   | 0.0878      | 14.07956     | 2.35262      | 0.0439  |
| 9      | 21.291        | VB   | 0.0806      | 20.27028     | 3.72081      | 0.0632  |
| 10     | 21.789        | BV R | 0.1237      | 3.10069e4    | 3860.99536   | 96.7049 |
| 11     | 22.117        | VV E | 0.1358      | 401.01624    | 40.05136     | 1.2507  |
| 12     | 22.285        | VV E | 0.0894      | 19.76507     | 3.05993      | 0.0616  |
| 13     | 22.710        | BB   | 0.1252      | 194.15594    | 22.17187     | 0.6055  |
| 14     | 23.270        | BV   | 0.0674      | 28.24593     | 6.41218      | 0.0881  |
| 15     | 23.369        | VB   | 0.0942      | 26.48766     | 3.90199      | 0.0826  |

Totals :                                    3.20634e4   3992.48341

=====  
\*\*\* End of Report \*\*\*

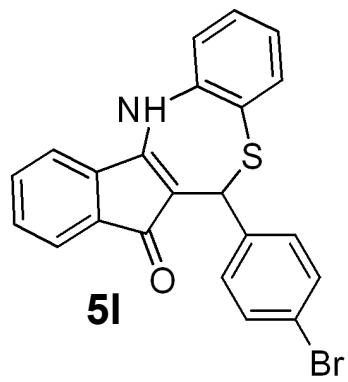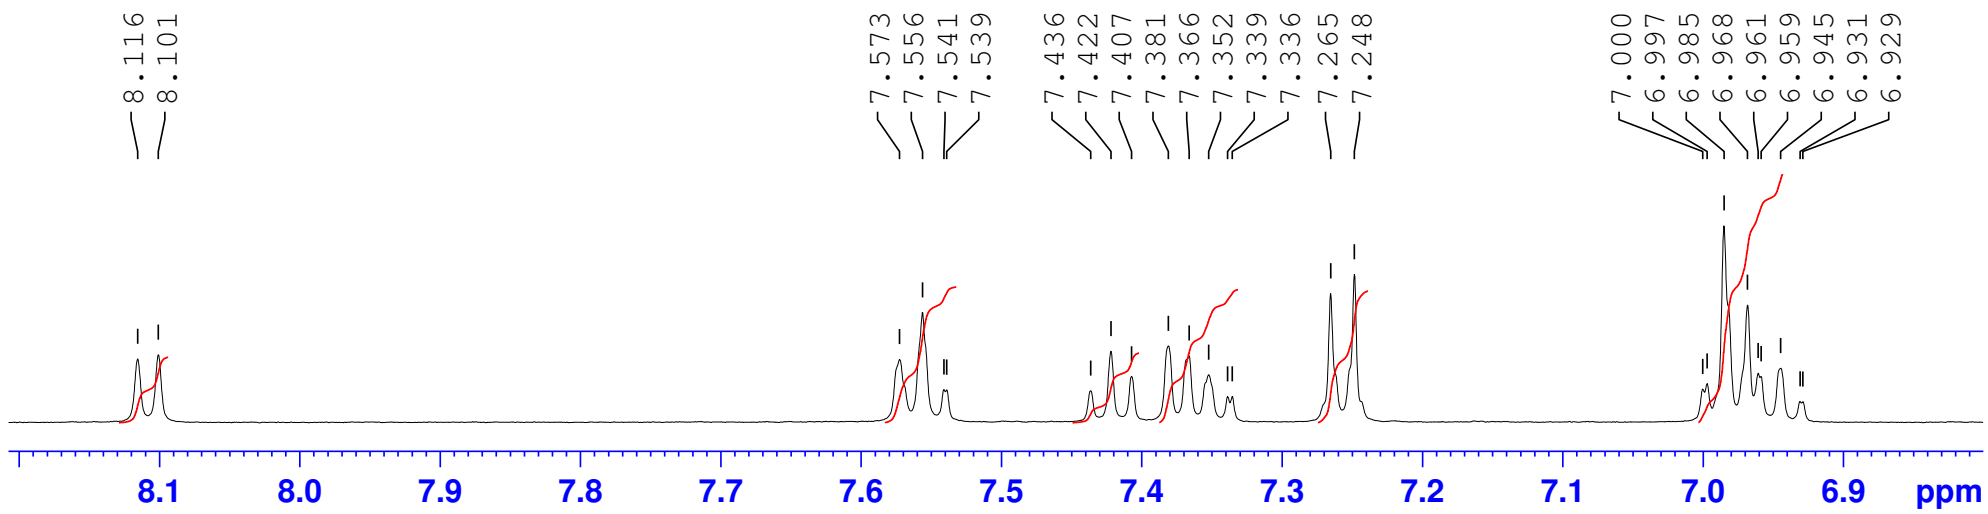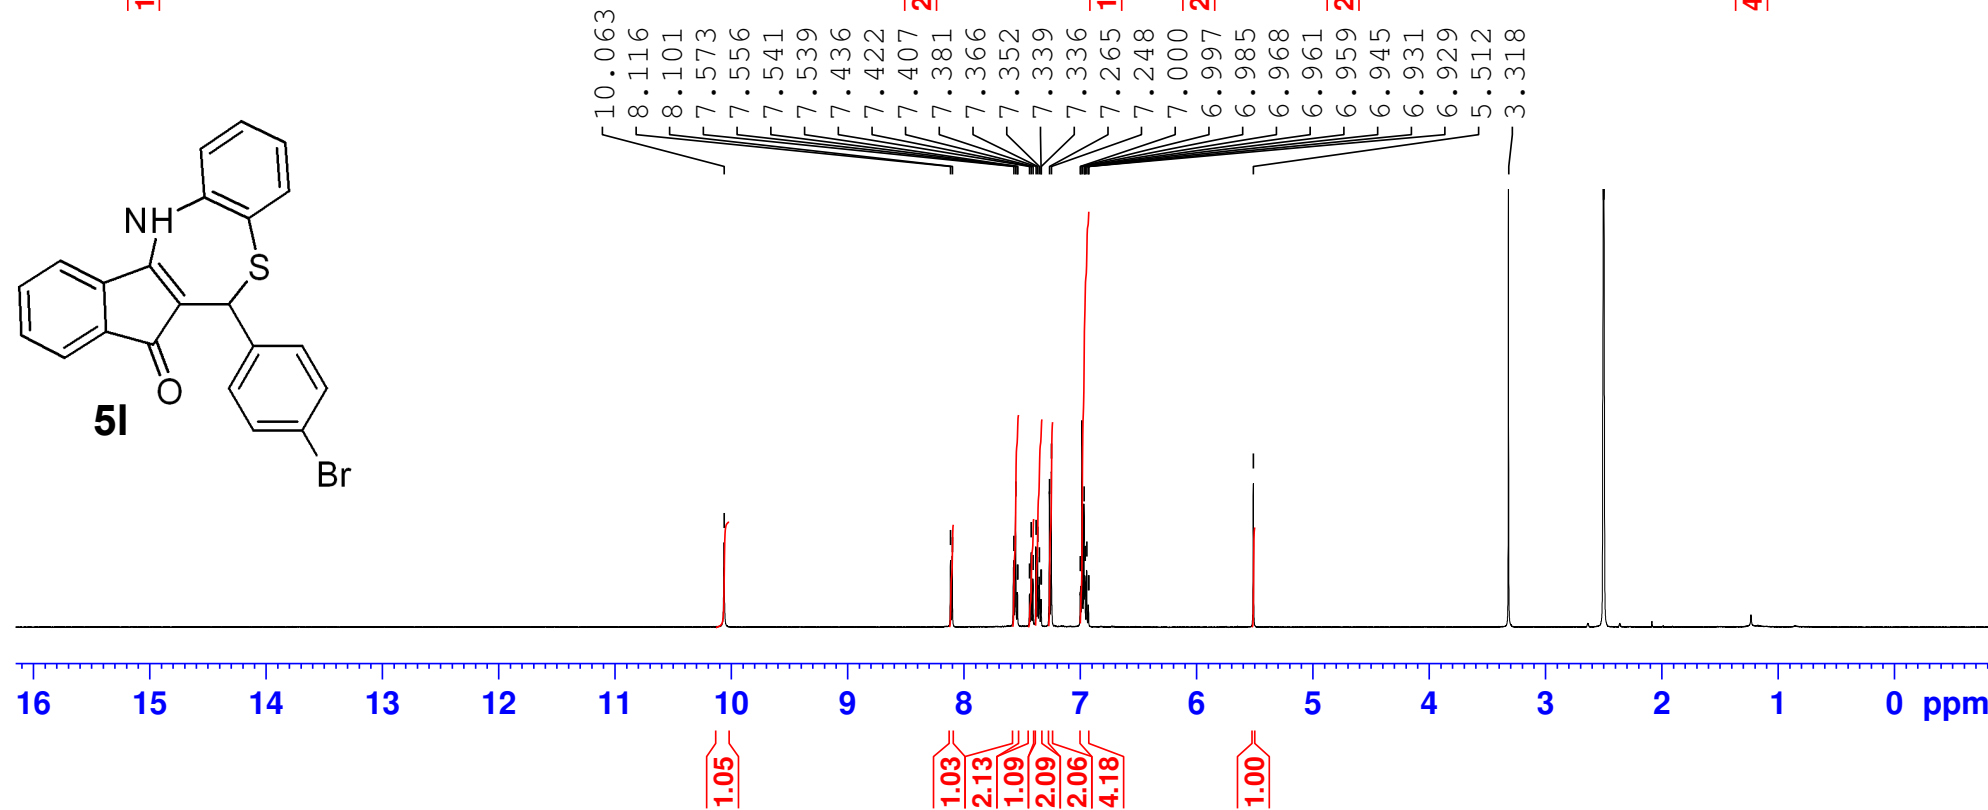

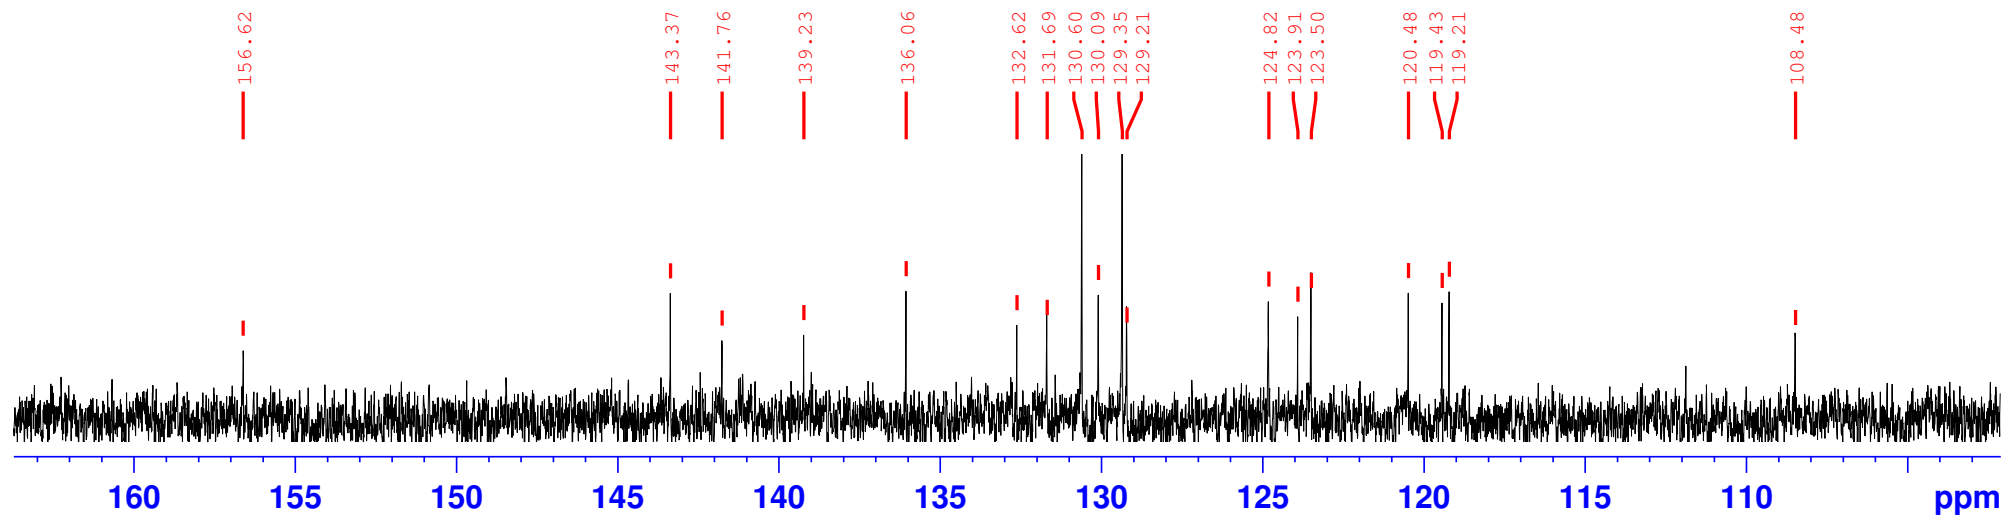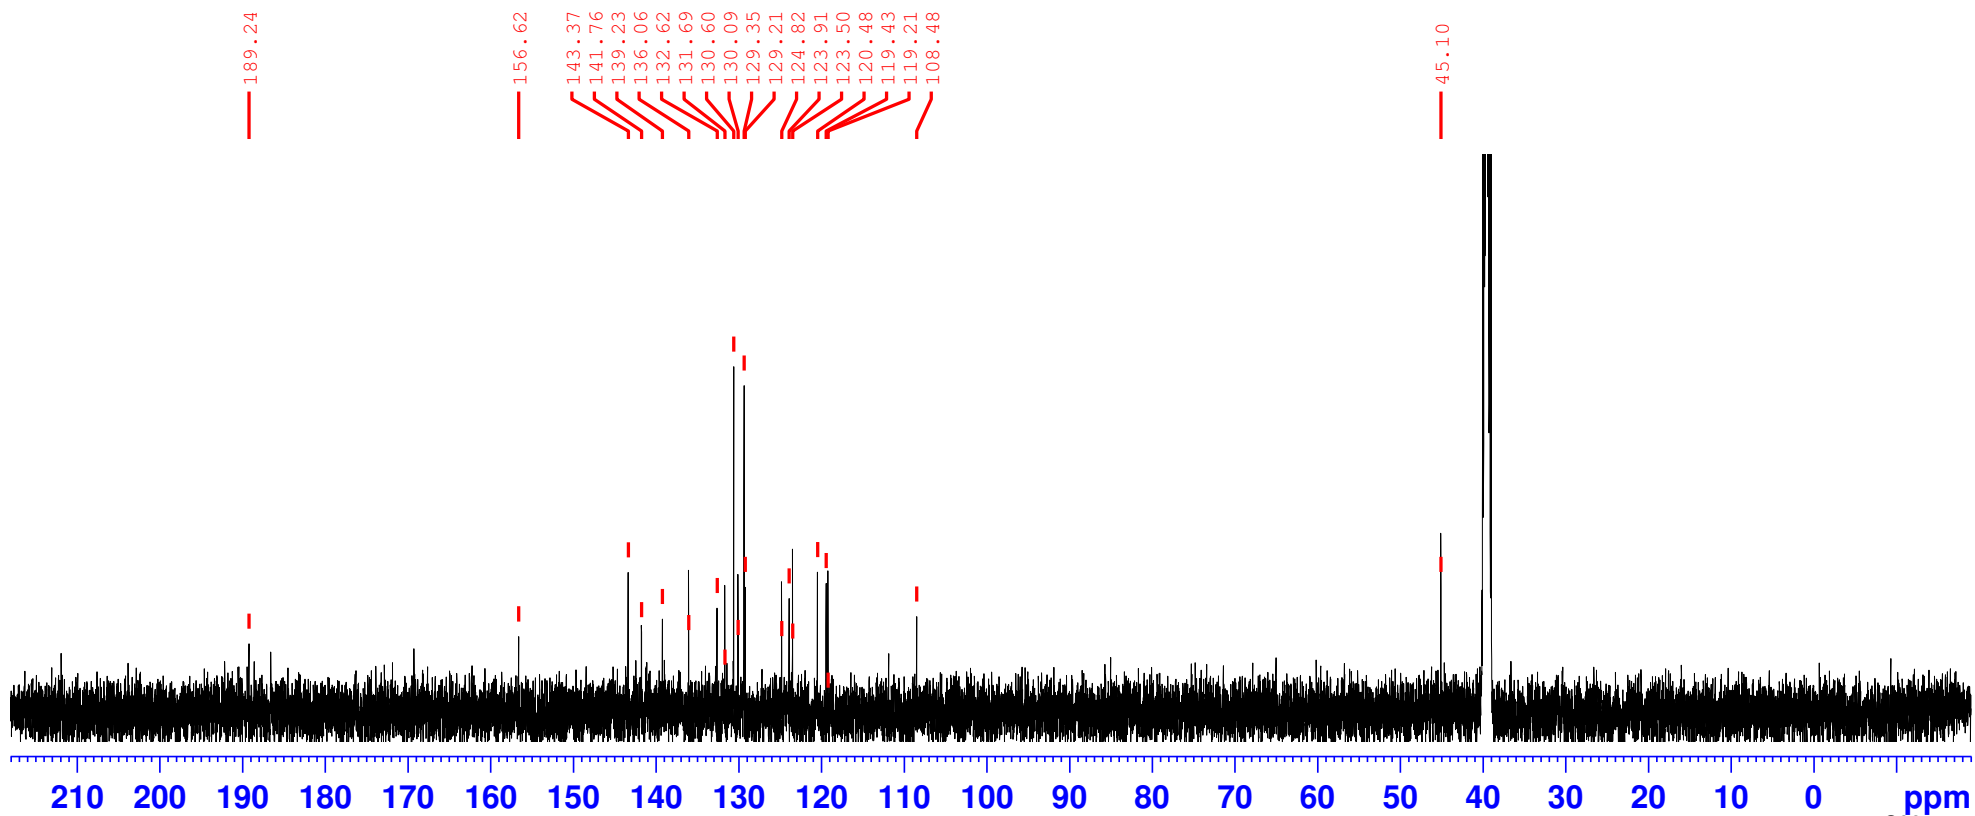



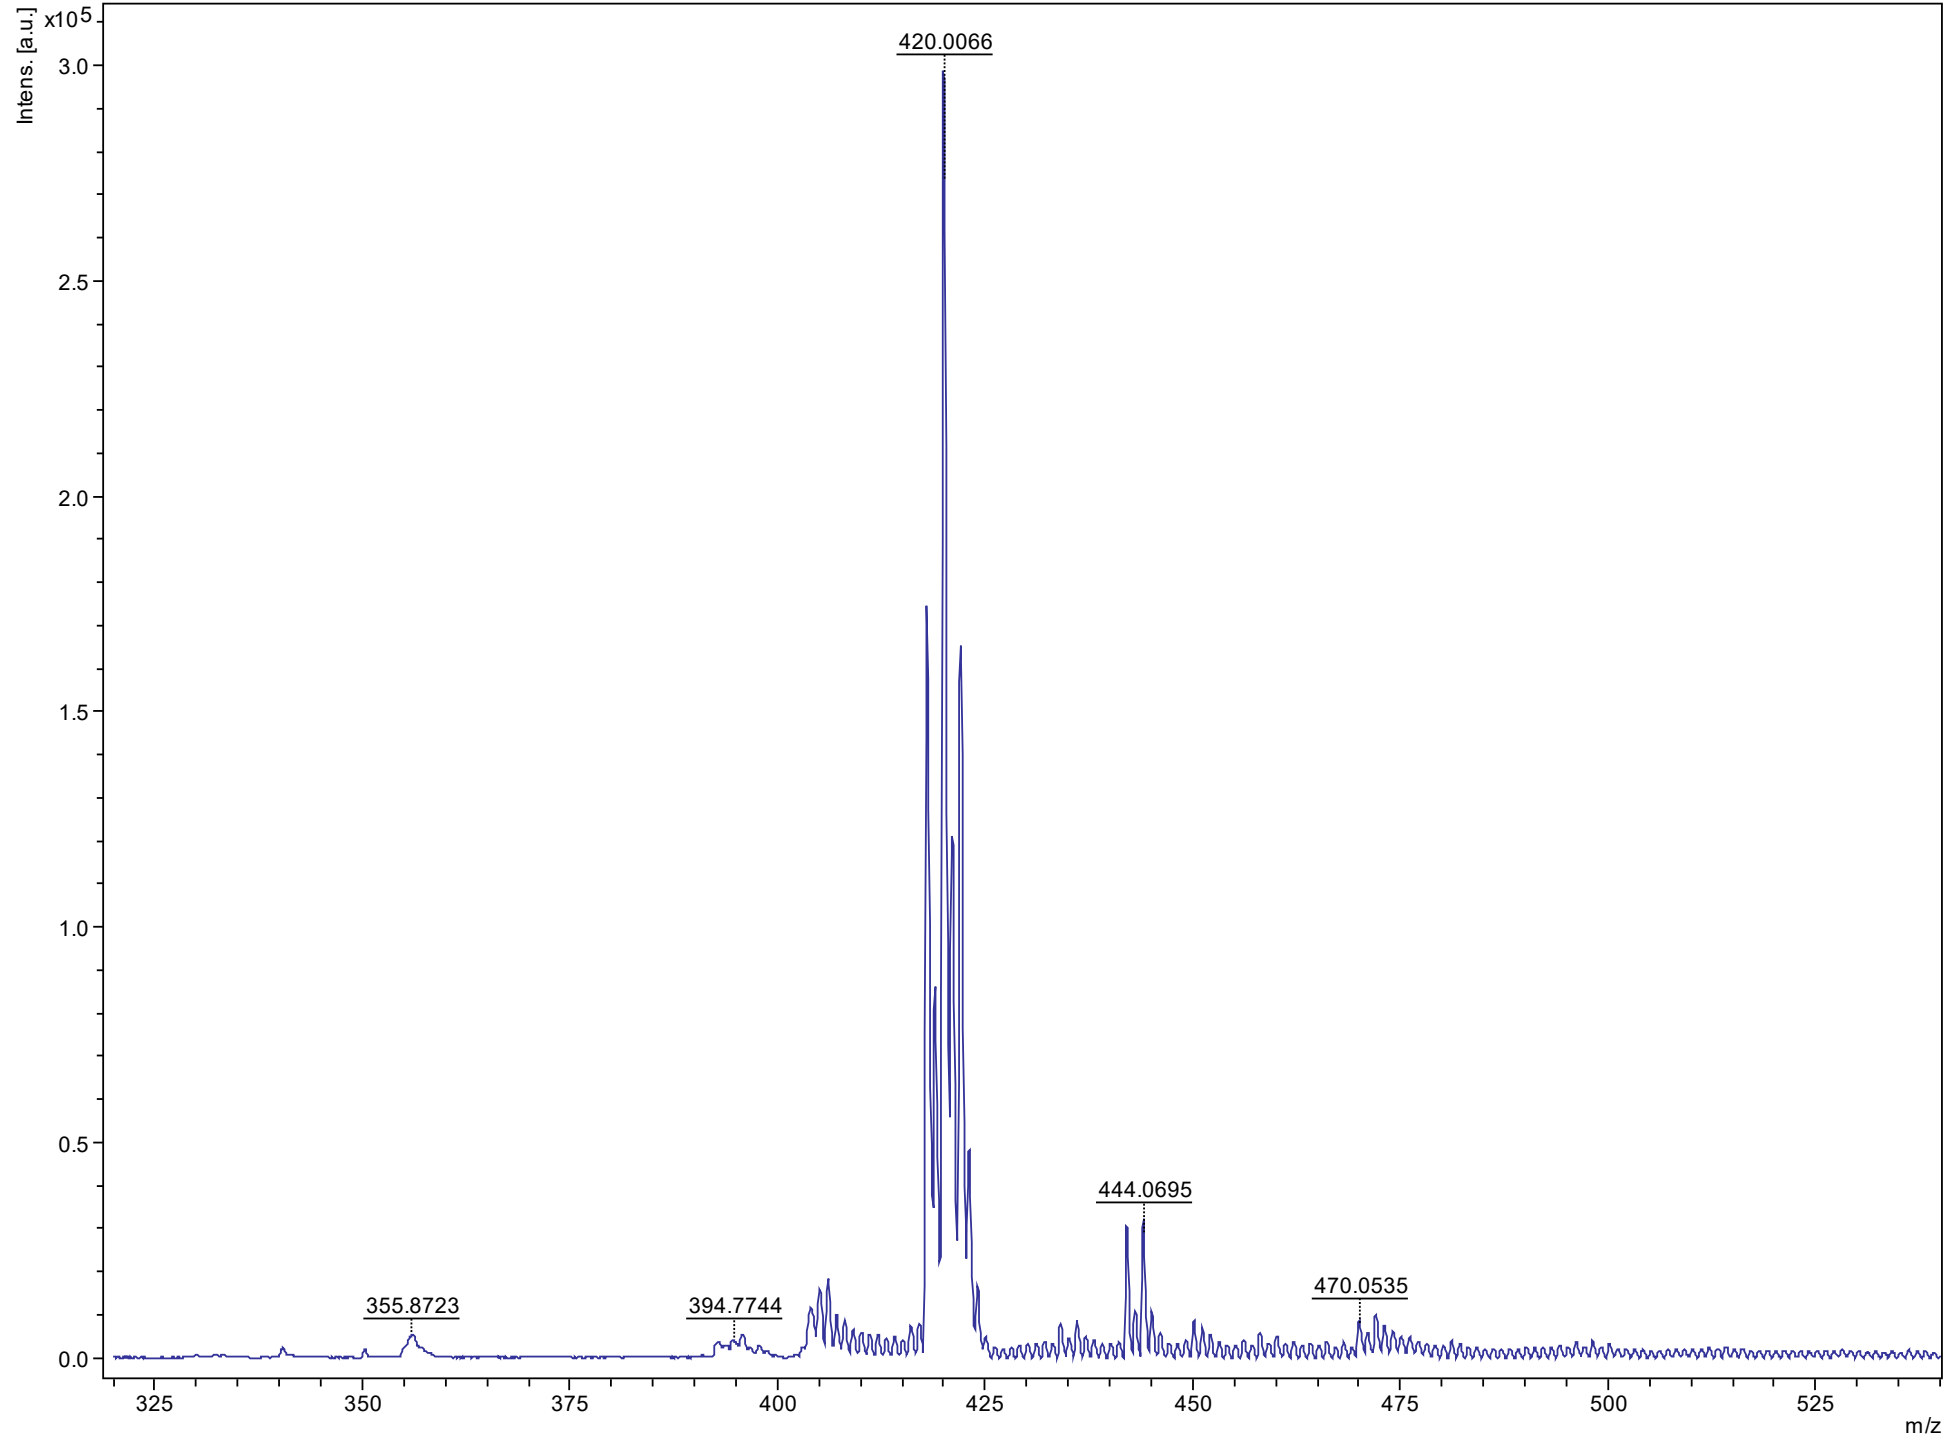

```

=====
Acq. Operator   : SYSTEM                      Seq. Line :   10
Sample Operator : SYSTEM
Acq. Instrument : 1260Infinity2              Location  : P1-B-02
Injection Date  : 2/20/2020 2:52:28 PM       Inj       :    1
                                           Inj Volume: 50.000 µl

Method          : C:\Users\Public\Documents\ChemStation\1\Data\Huihua-MC 2020-02-20 10-53-28
                  \MC-SMALL MOLE.M (Sequence Method)
Last changed    : 2/19/2020 11:54:04 AM by SYSTEM
Additional Info : Peak(s) manually integrated
  
```

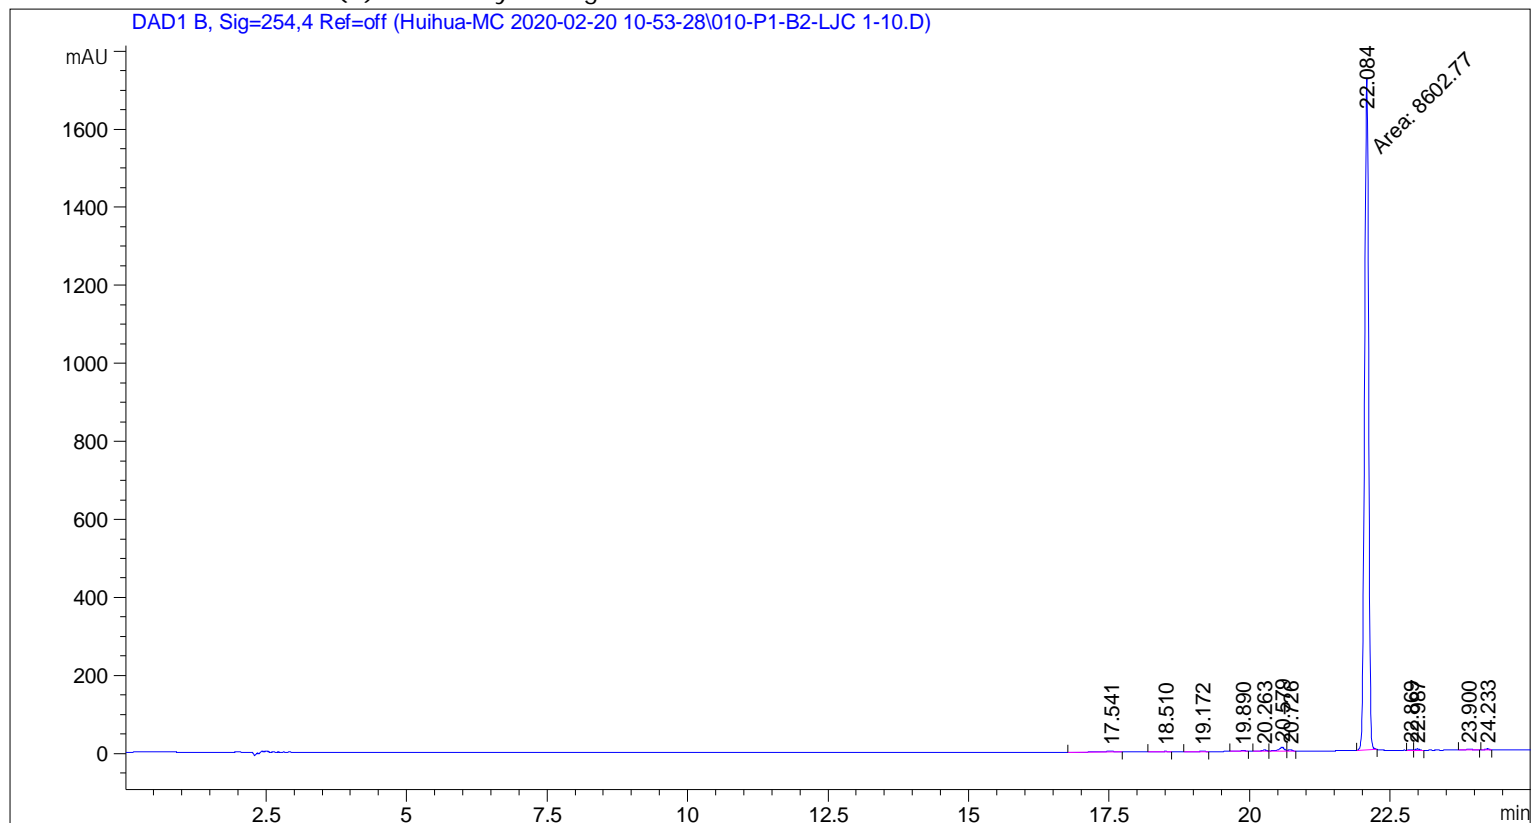

Area Percent Report

```

Sorted By      : Signal
Multiplier     : 1.0000
Dilution       : 1.0000
Use Multiplier & Dilution Factor with ISTDs
  
```

Signal 1: DAD1 B, Sig=254,4 Ref=off

| Peak # | RetTime [min] | Type | Width [min] | Area [mAU*s] | Height [mAU] | Area %  |
|--------|---------------|------|-------------|--------------|--------------|---------|
| 1      | 17.541        | BB   | 0.1958      | 32.40498     | 2.17484      | 0.3661  |
| 2      | 18.510        | BB   | 0.0951      | 8.37263      | 1.26717      | 0.0946  |
| 3      | 19.172        | BB   | 0.0995      | 13.87209     | 1.98501      | 0.1567  |
| 4      | 19.890        | BB   | 0.1008      | 19.03114     | 2.74774      | 0.2150  |
| 5      | 20.263        | BV   | 0.0961      | 23.47944     | 3.50729      | 0.2653  |
| 6      | 20.579        | VV   | 0.1021      | 76.04619     | 10.29921     | 0.8592  |
| 7      | 20.726        | VB   | 0.0802      | 17.80149     | 3.23307      | 0.2011  |
| 8      | 22.084        | MM   | 0.0832      | 8602.76563   | 1723.17896   | 97.2016 |

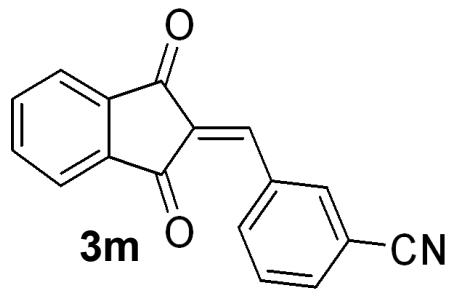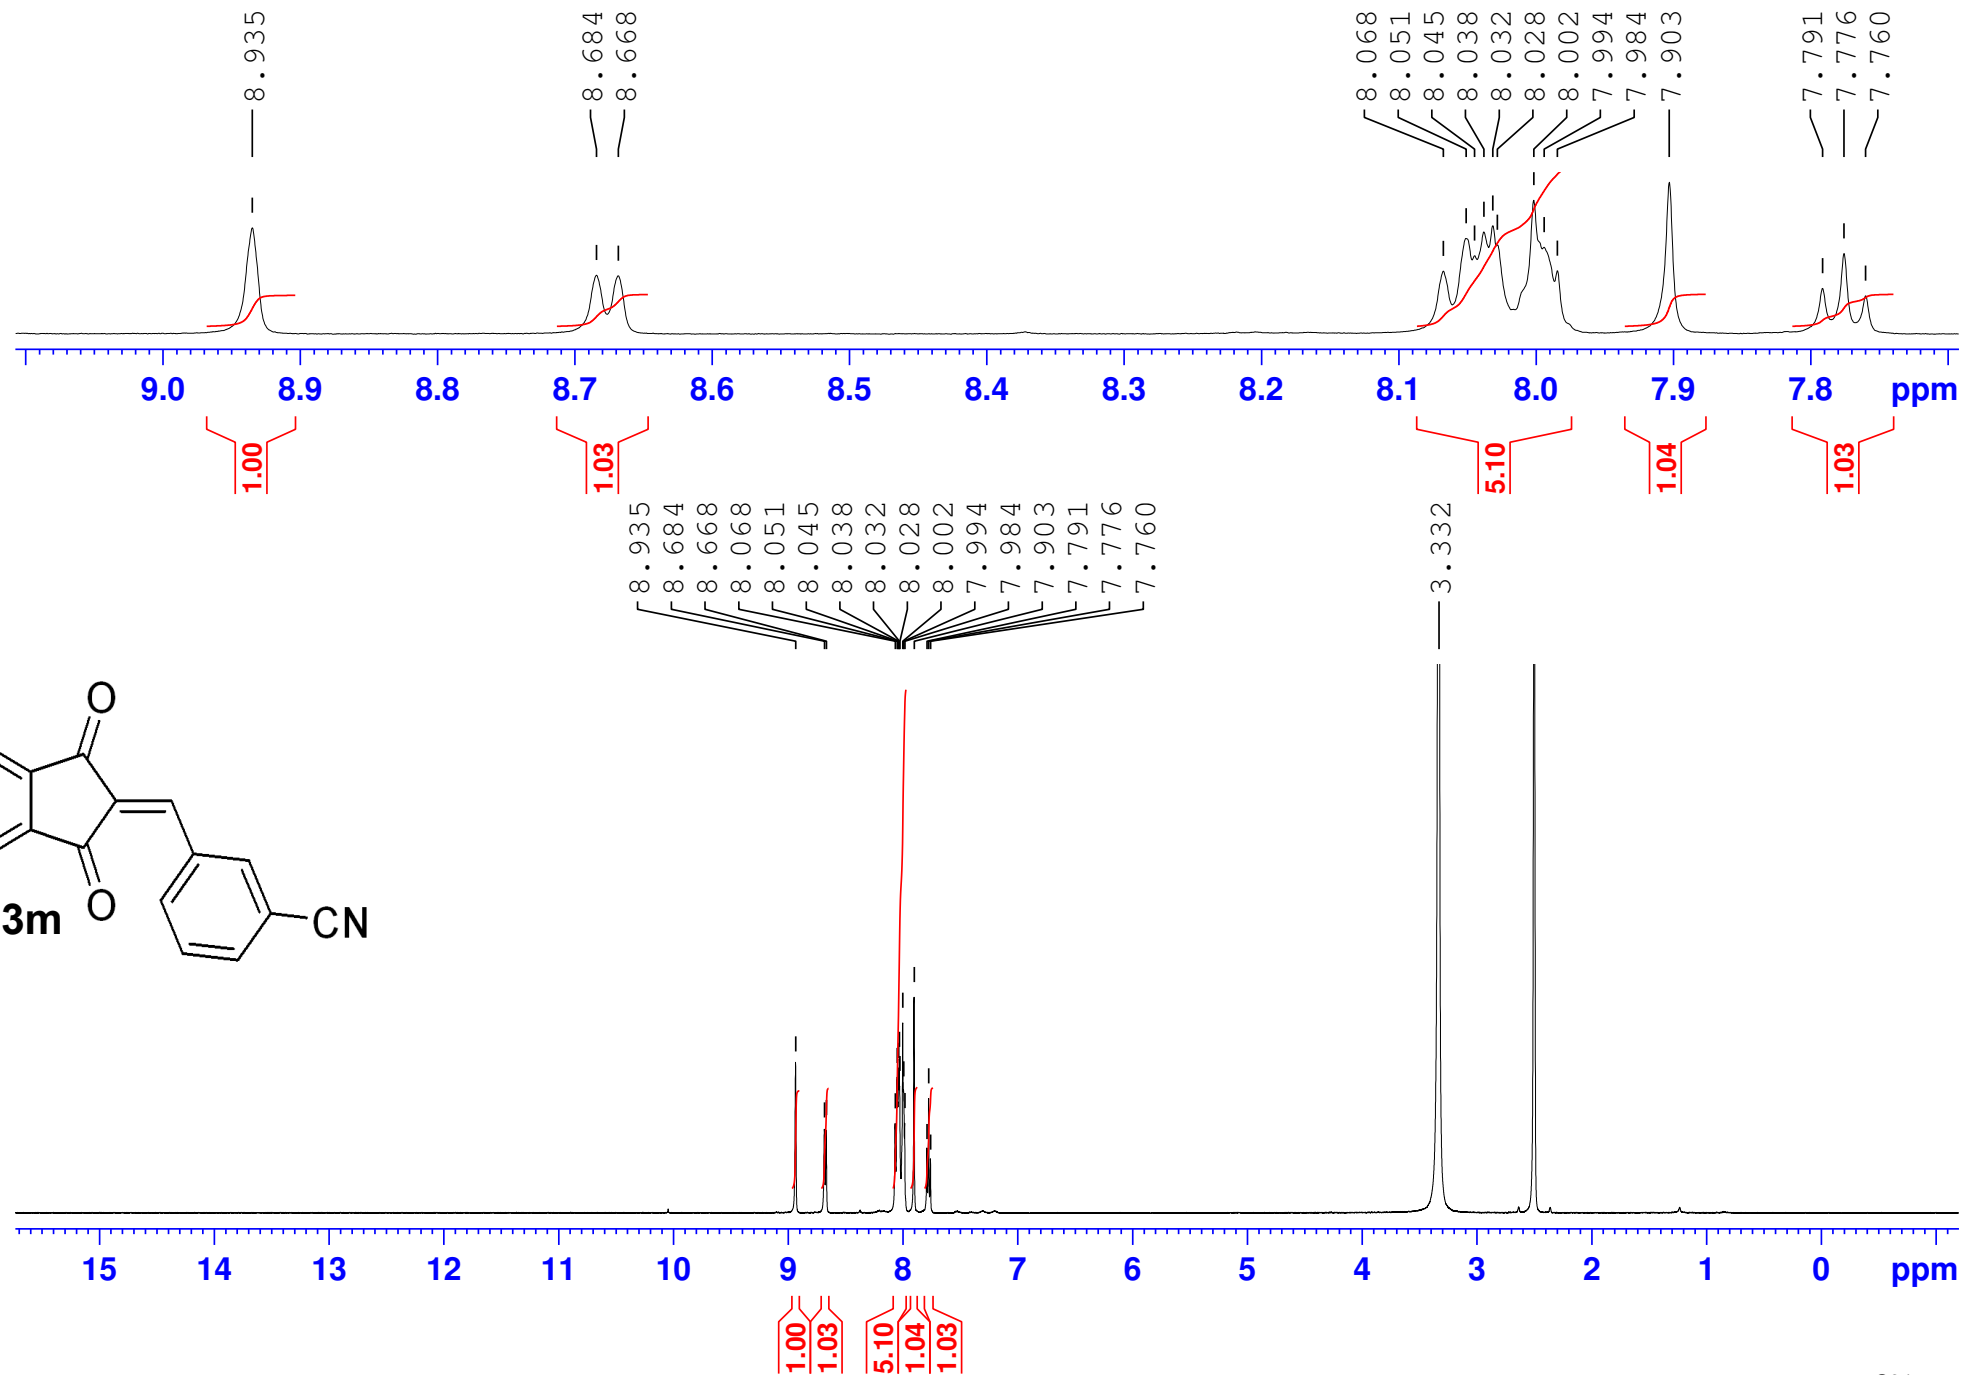

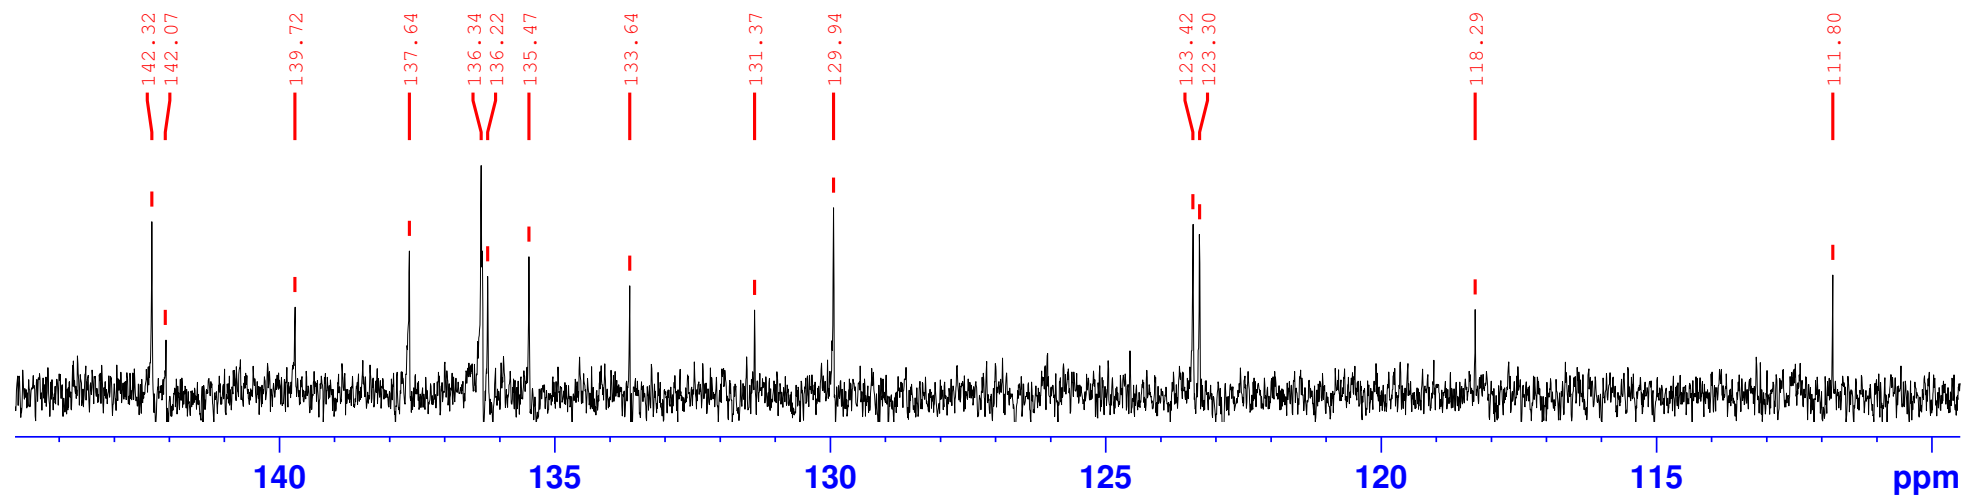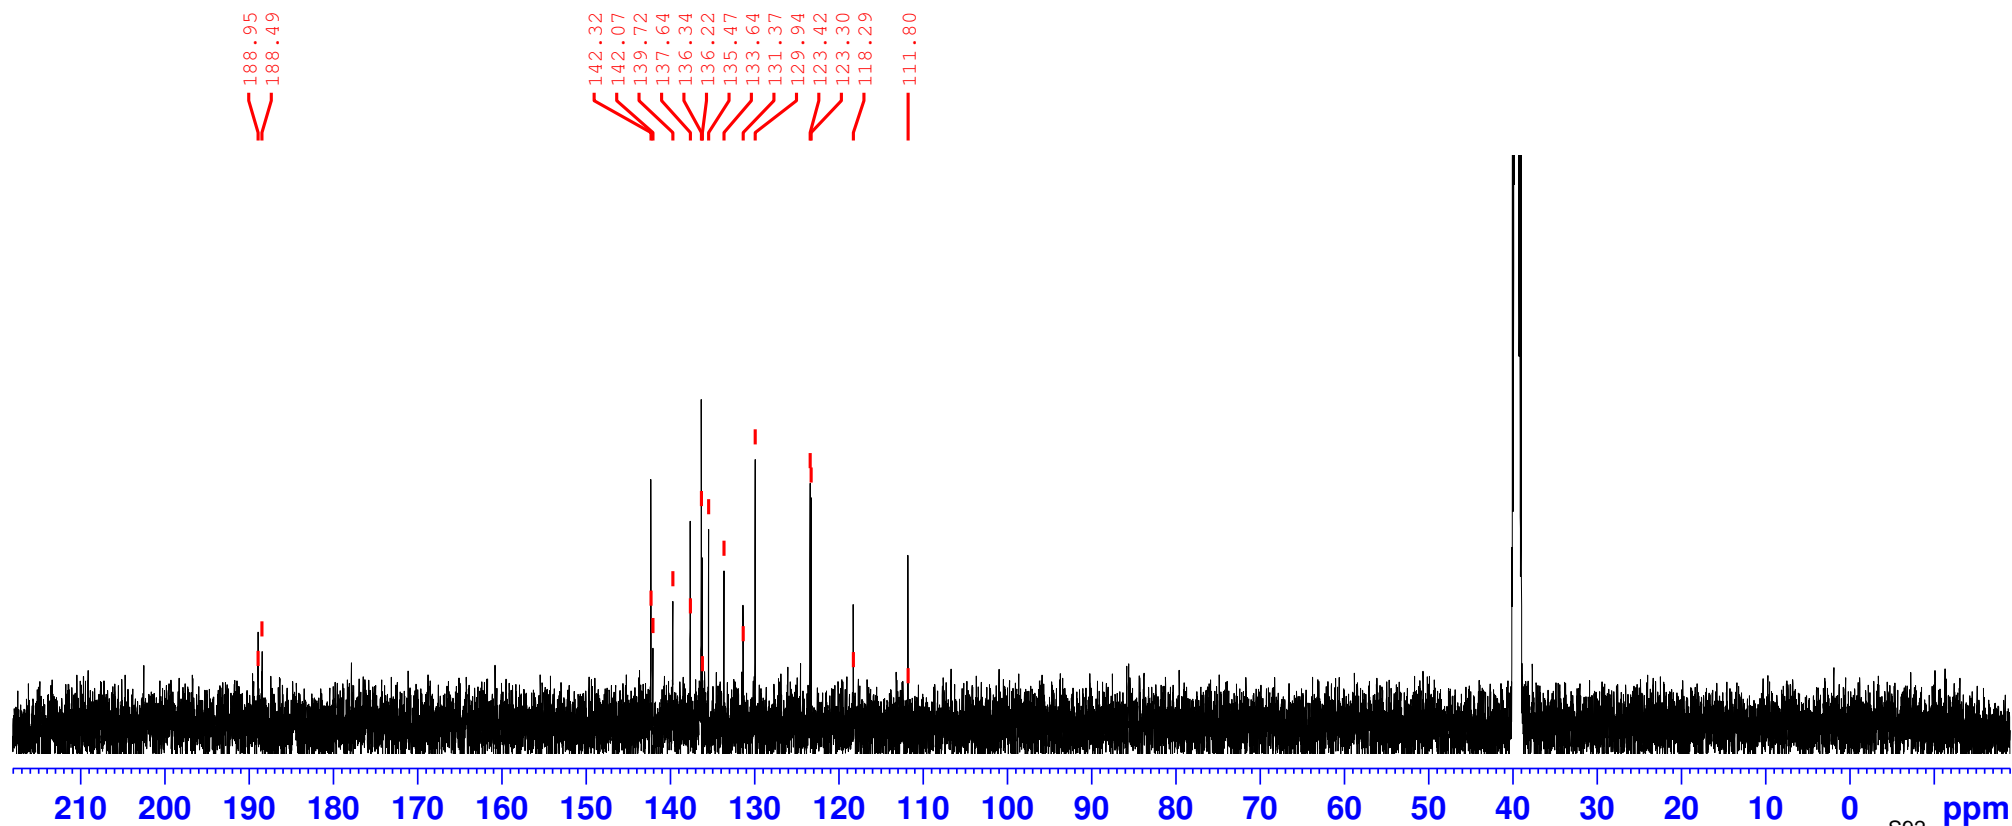

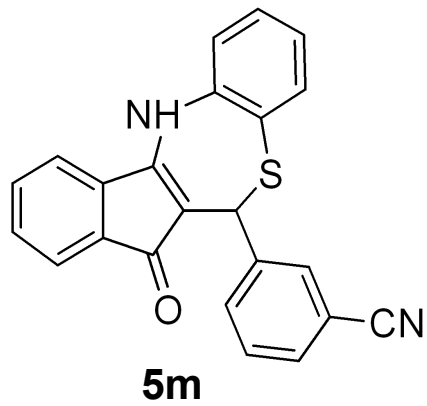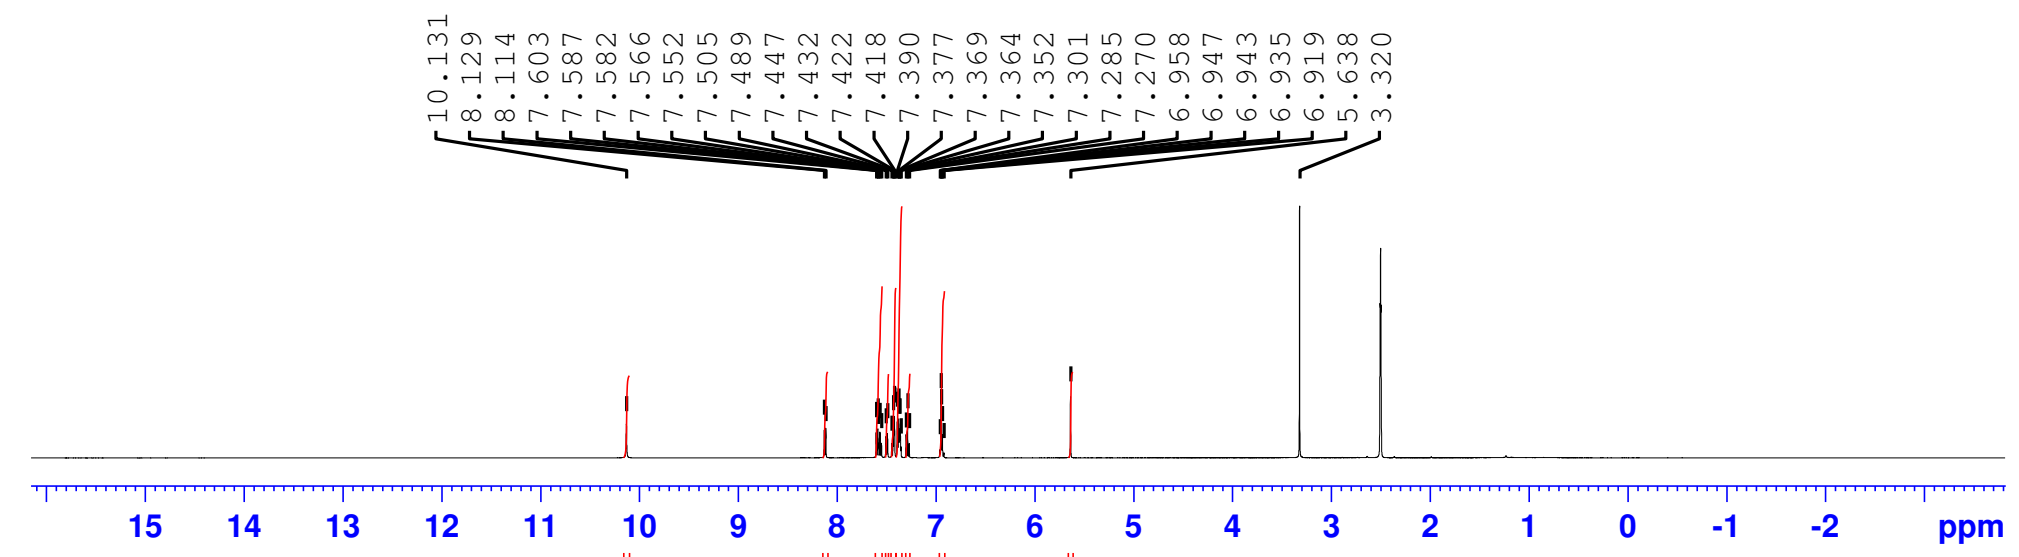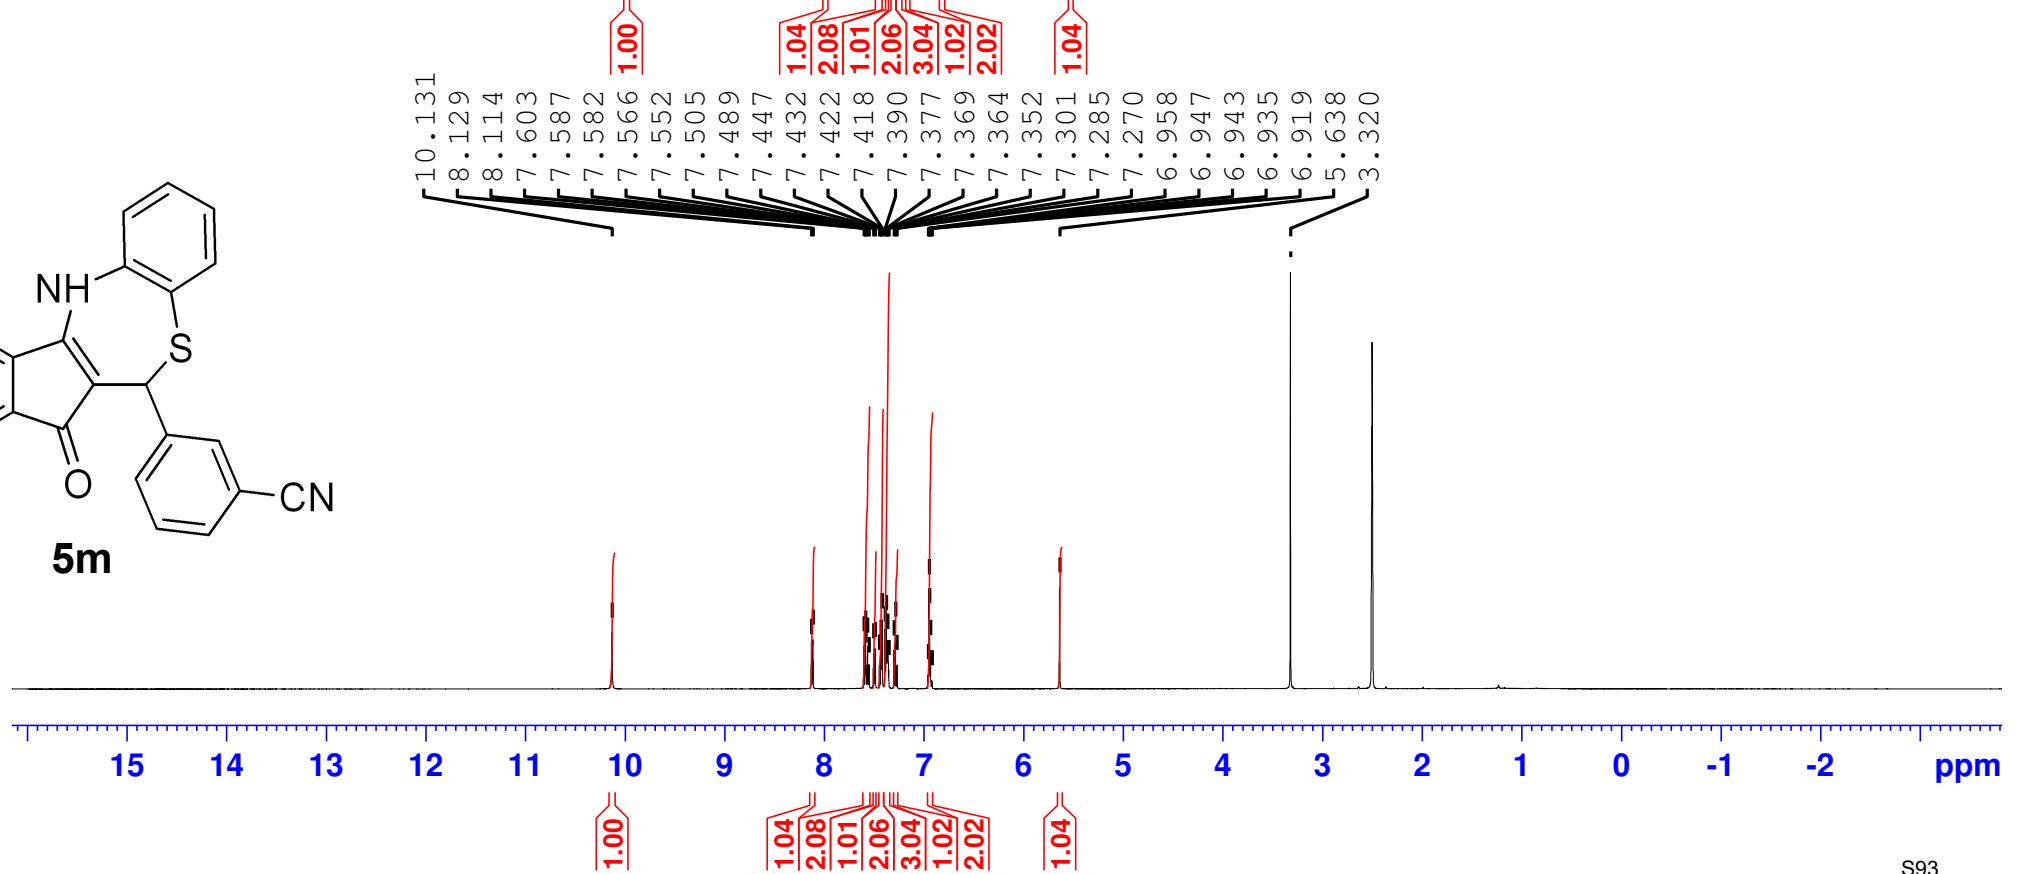

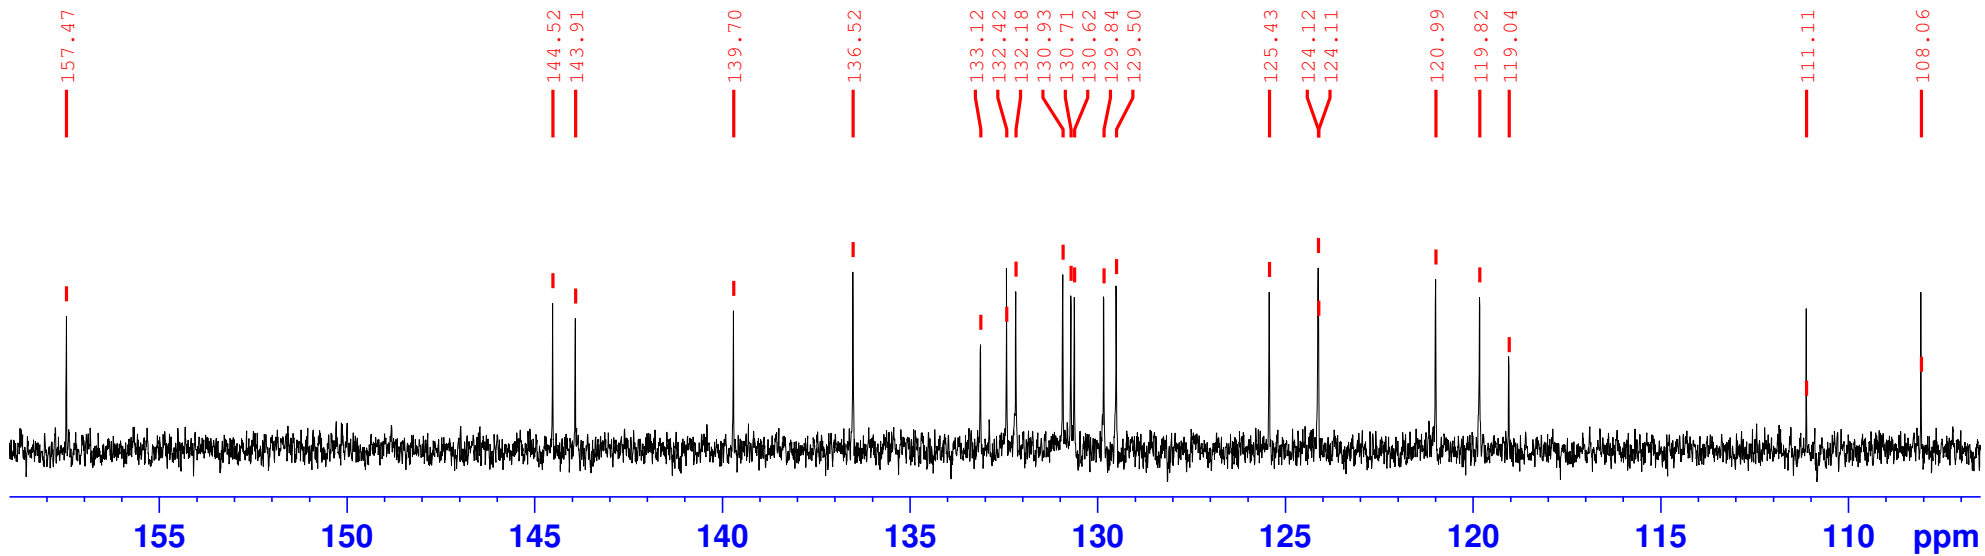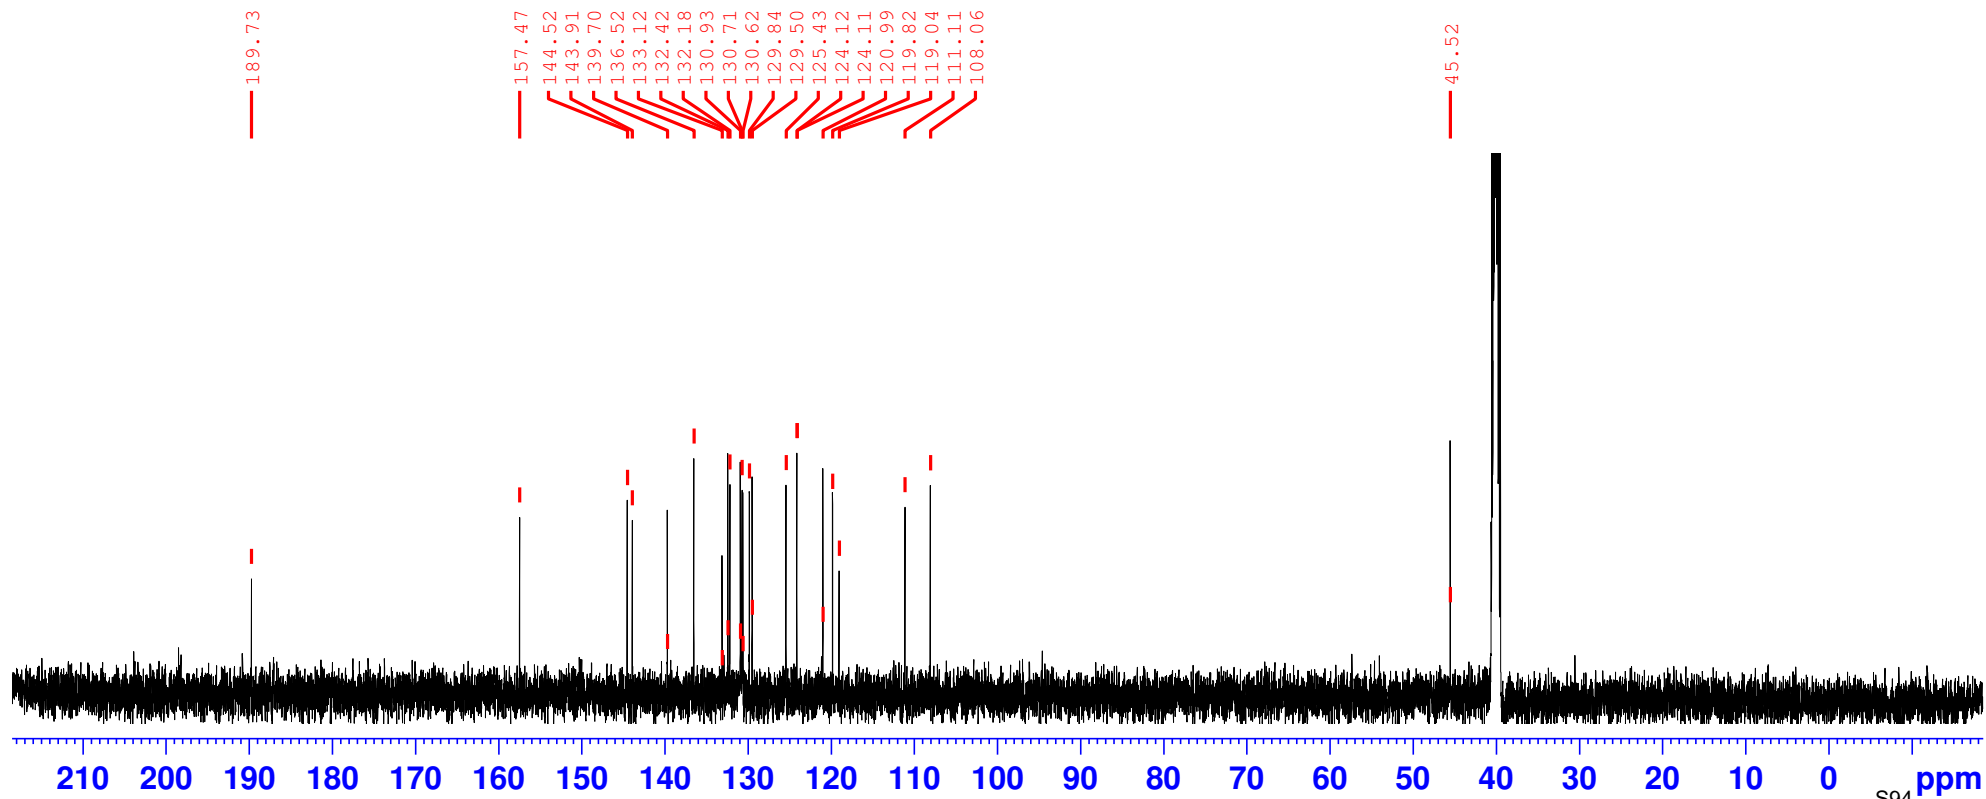

# User Spectrum Plot Report

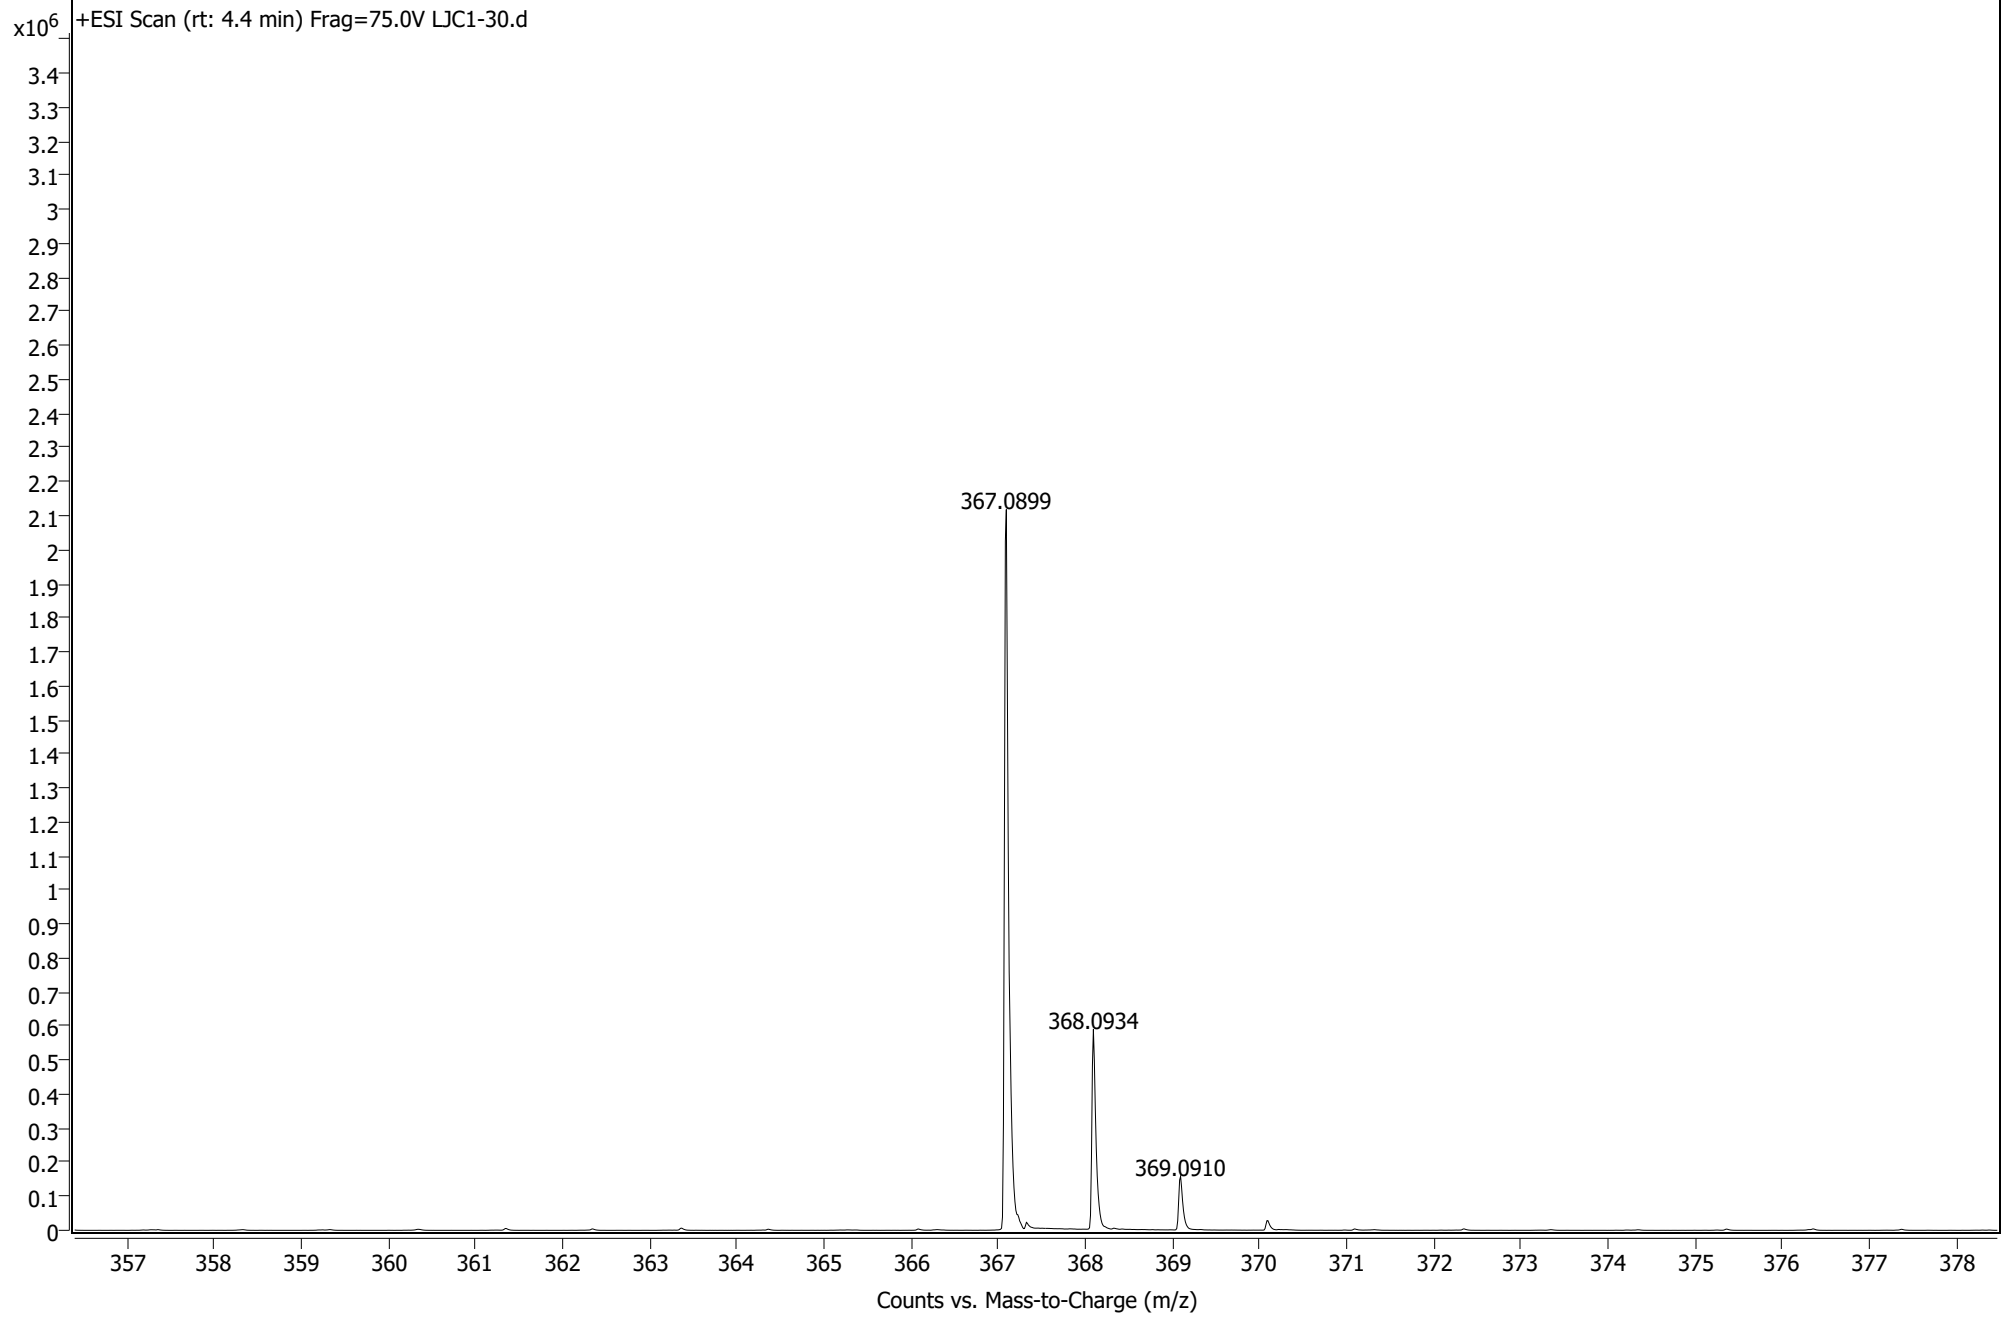

```

=====
Acq. Operator   : SYSTEM                      Seq. Line :    5
Sample Operator : SYSTEM
Acq. Instrument : 1260Infini ty2             Locati on :   P1-C-03
Injection Date  : 3/23/2020 3:51:00 PM      Inj       :    1
                                           Inj Volume: 50.000 µl

Method         : C:\Users\Public\Documents\ChemStation\1\Data\Huihua-MC 2020-03-23 14-13-54
                \MC-SMALL MOLE.M (Sequence Method)
Last changed   : 2/19/2020 11:54:04 AM by SYSTEM
  
```

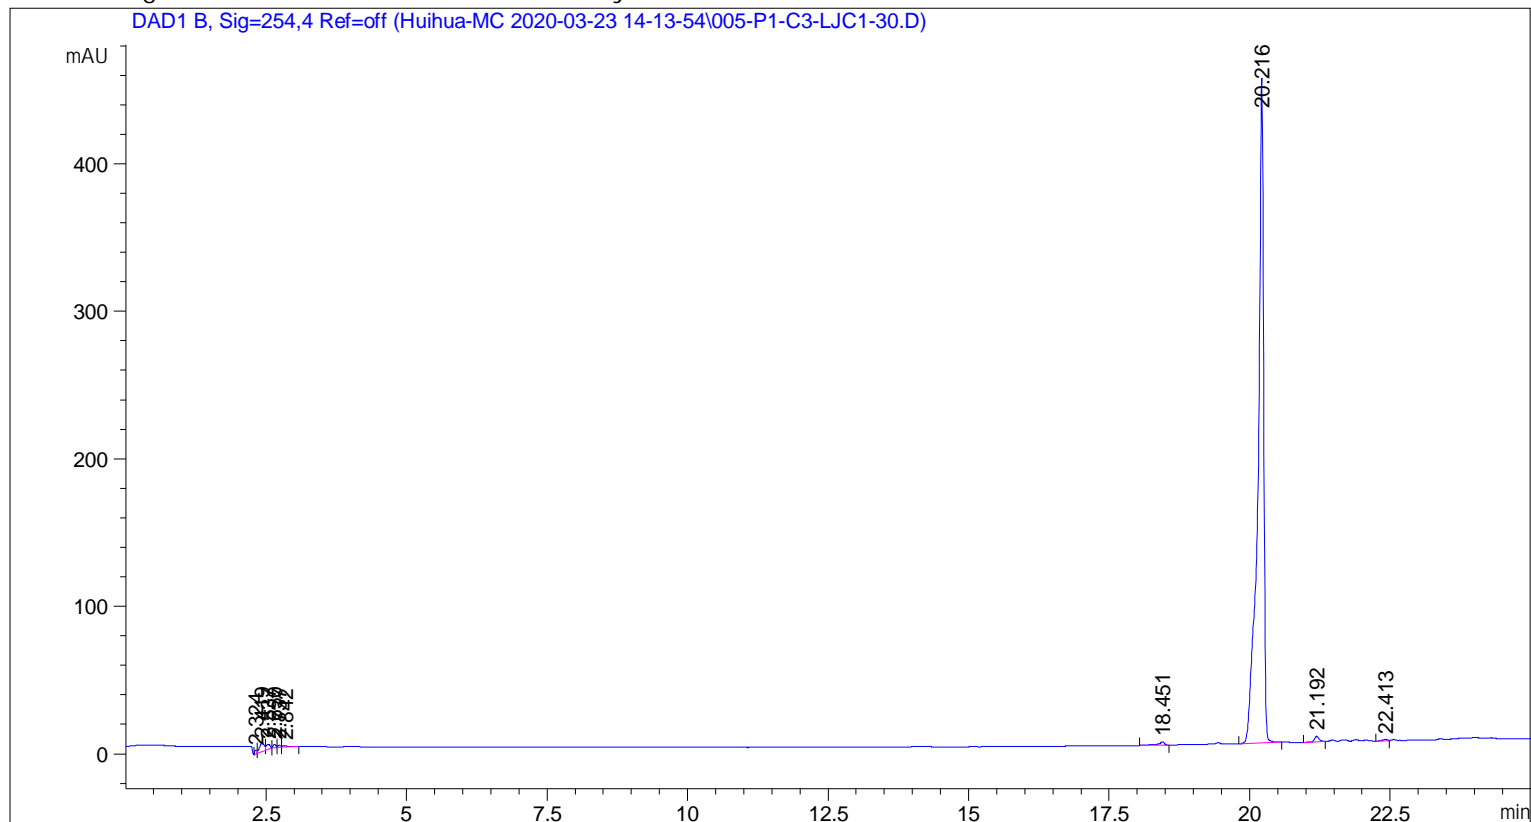

=====  
 Area Percent Report  
 =====

```

Sorted By      :      Signal
Multiplier     :      1.0000
Dilution       :      1.0000
Use Multiplier & Dilution Factor with ISTDs
  
```

Signal 1: DAD1 B, Sig=254,4 Ref=off

| Peak # | RetTime [min] | Type | Width [min] | Area [mAU*s] | Height [mAU] | Area %  |
|--------|---------------|------|-------------|--------------|--------------|---------|
| 1      | 2.324         | BV   | 0.0440      | 6.67127      | 2.43366      | 0.2030  |
| 2      | 2.419         | VV   | 0.0833      | 33.35941     | 5.45547      | 1.0152  |
| 3      | 2.537         | VB   | 0.0674      | 15.37650     | 3.23788      | 0.4679  |
| 4      | 2.650         | BV   | 0.0486      | 7.10886      | 2.26824      | 0.2163  |
| 5      | 2.737         | VV   | 0.0603      | 5.41211      | 1.36257      | 0.1647  |
| 6      | 2.842         | VB   | 0.0946      | 7.40014      | 1.09833      | 0.2252  |
| 7      | 18.451        | BB   | 0.1138      | 18.00785     | 2.14840      | 0.5480  |
| 8      | 20.216        | BB   | 0.1000      | 3166.03979   | 450.58041    | 96.3498 |
| 9      | 21.192        | BB   | 0.0825      | 20.62754     | 3.73076      | 0.6277  |



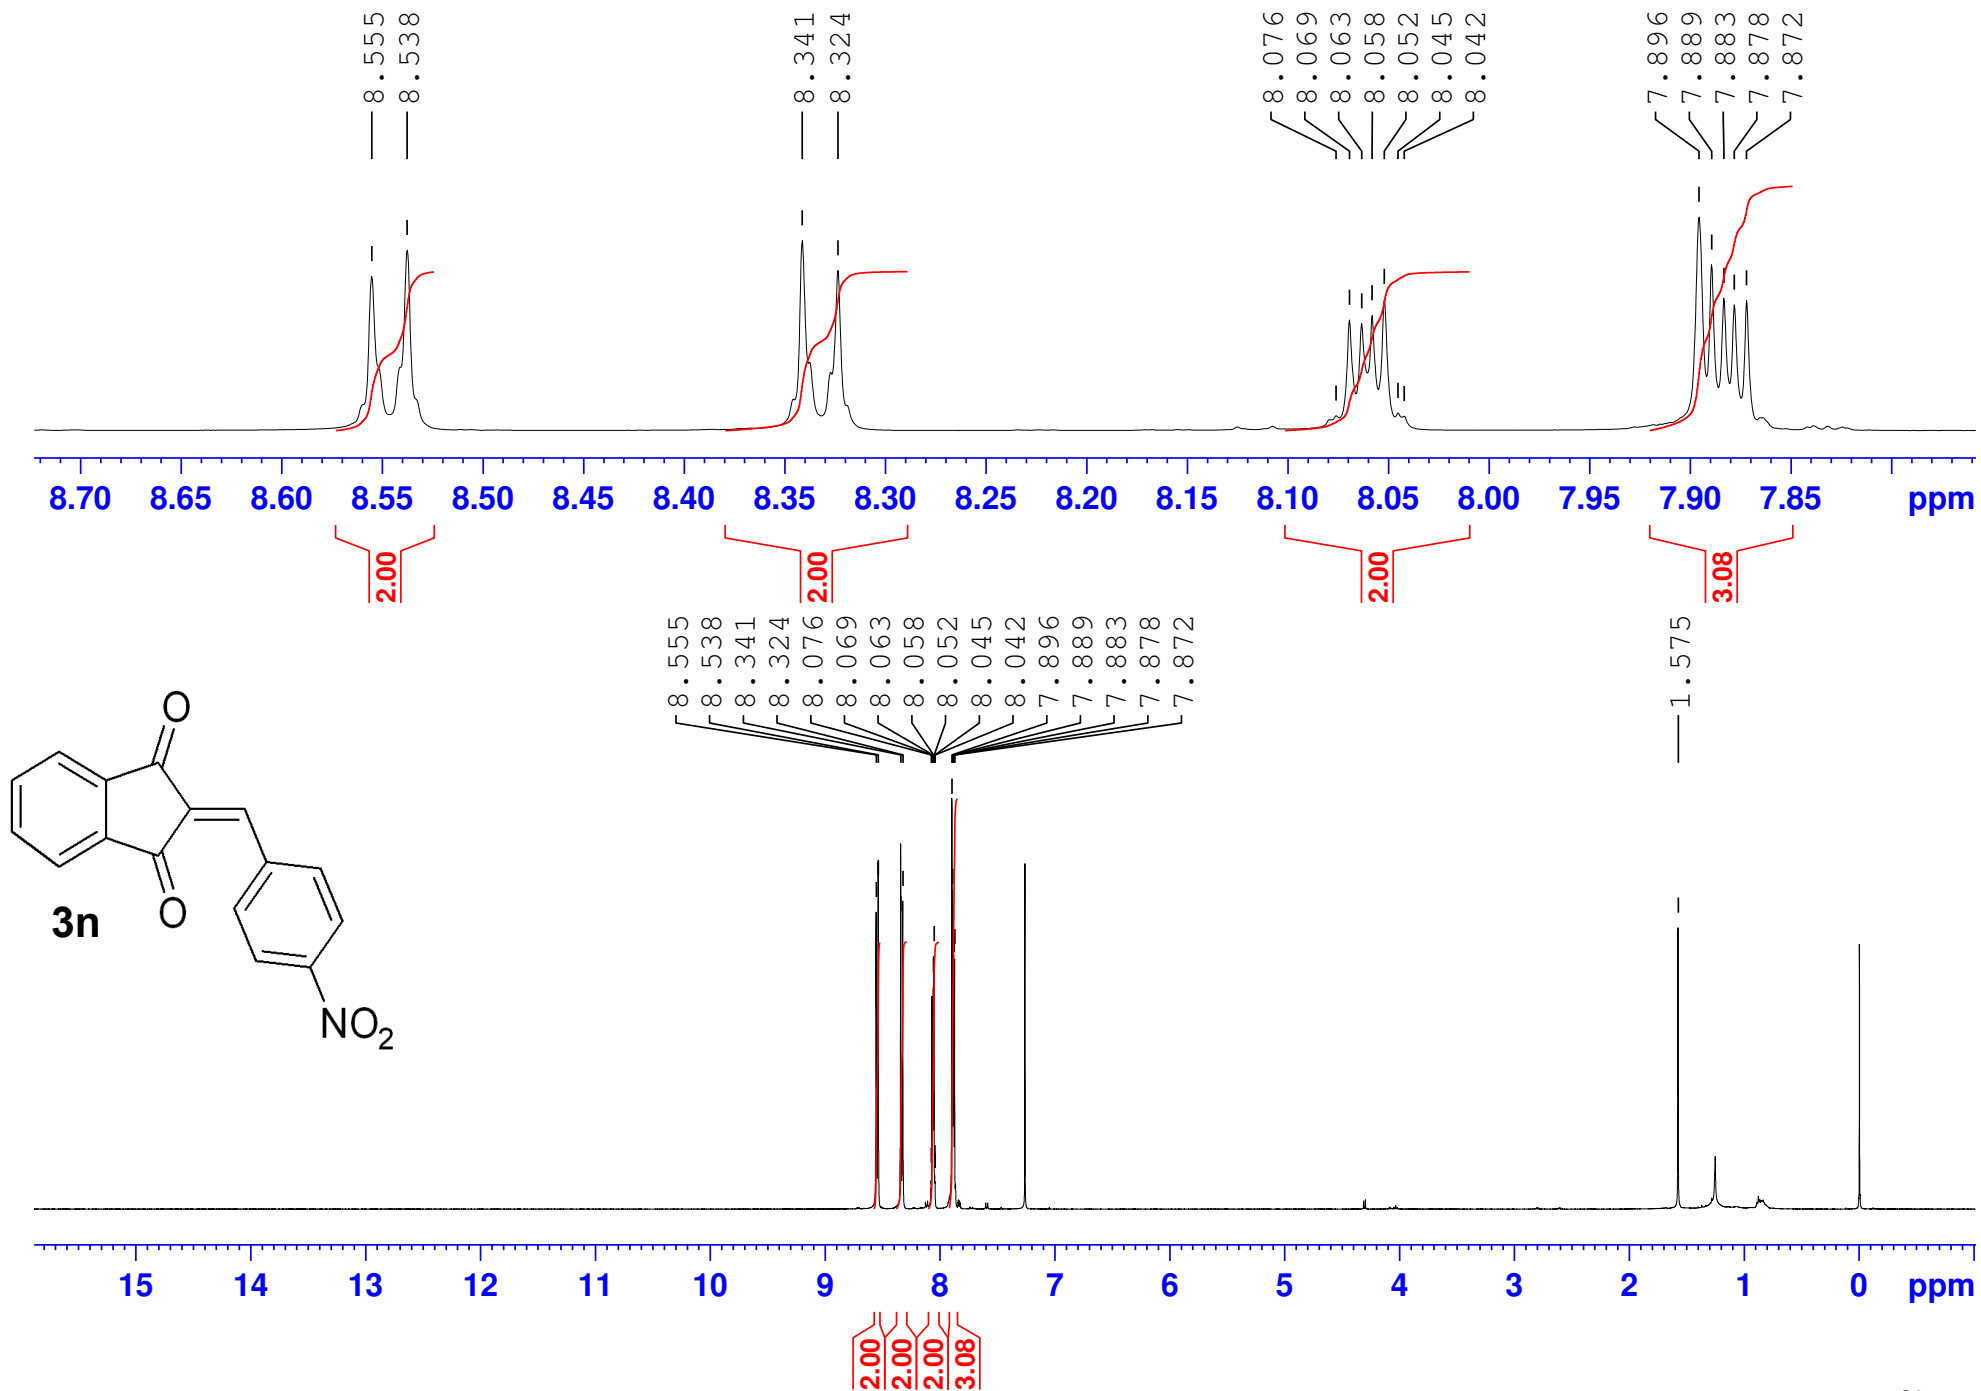

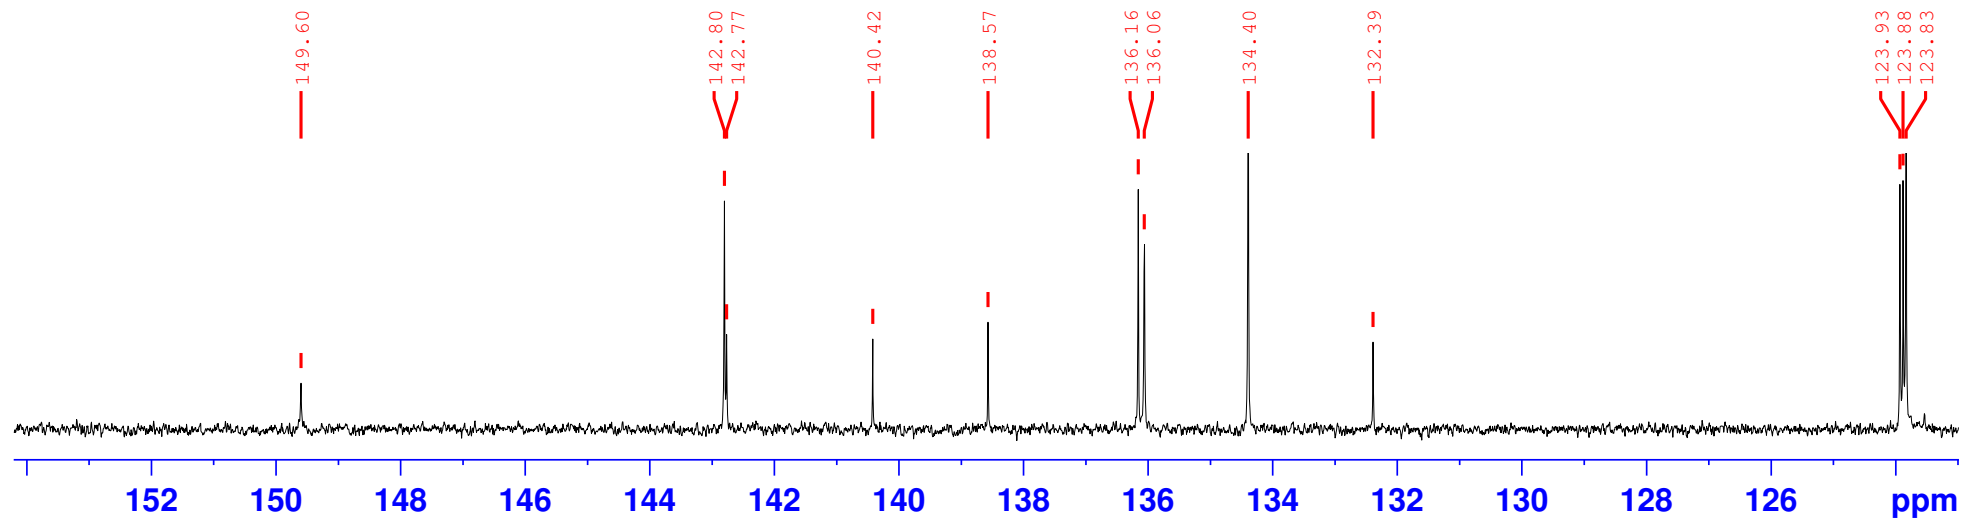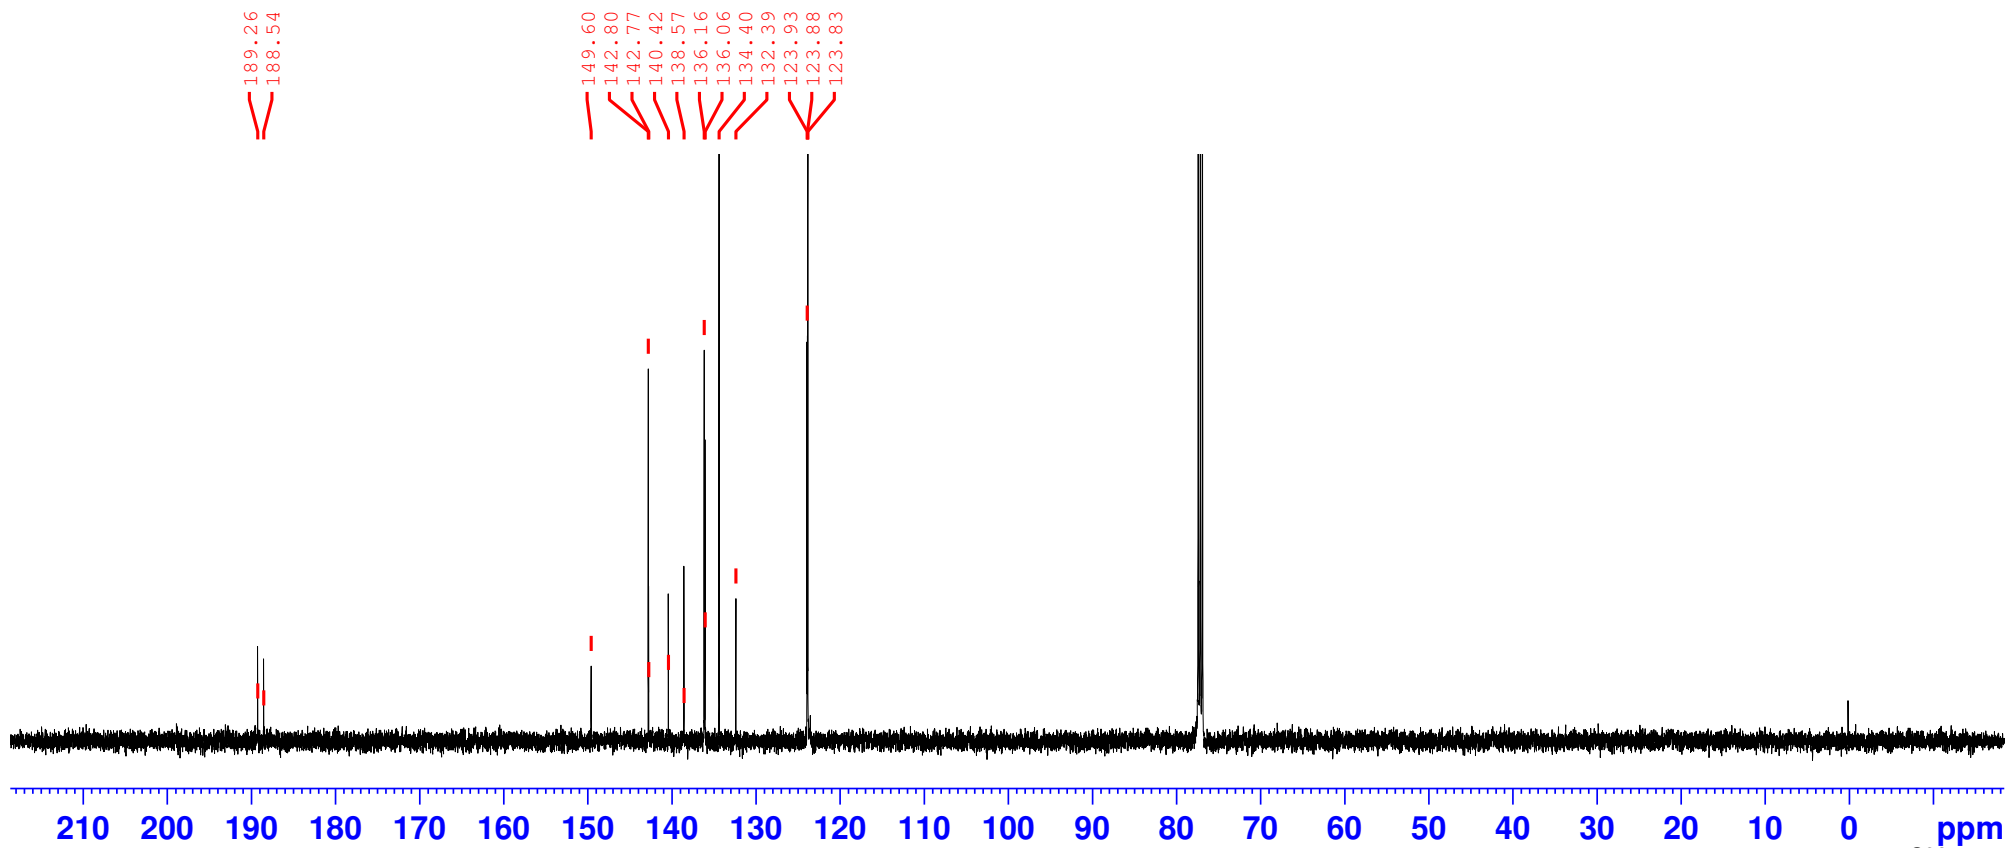

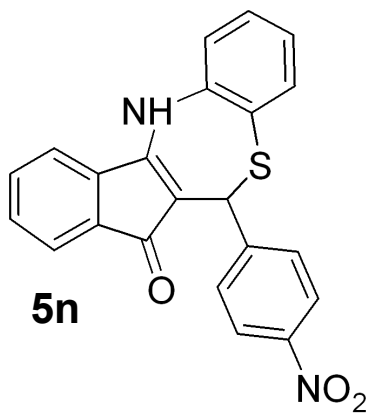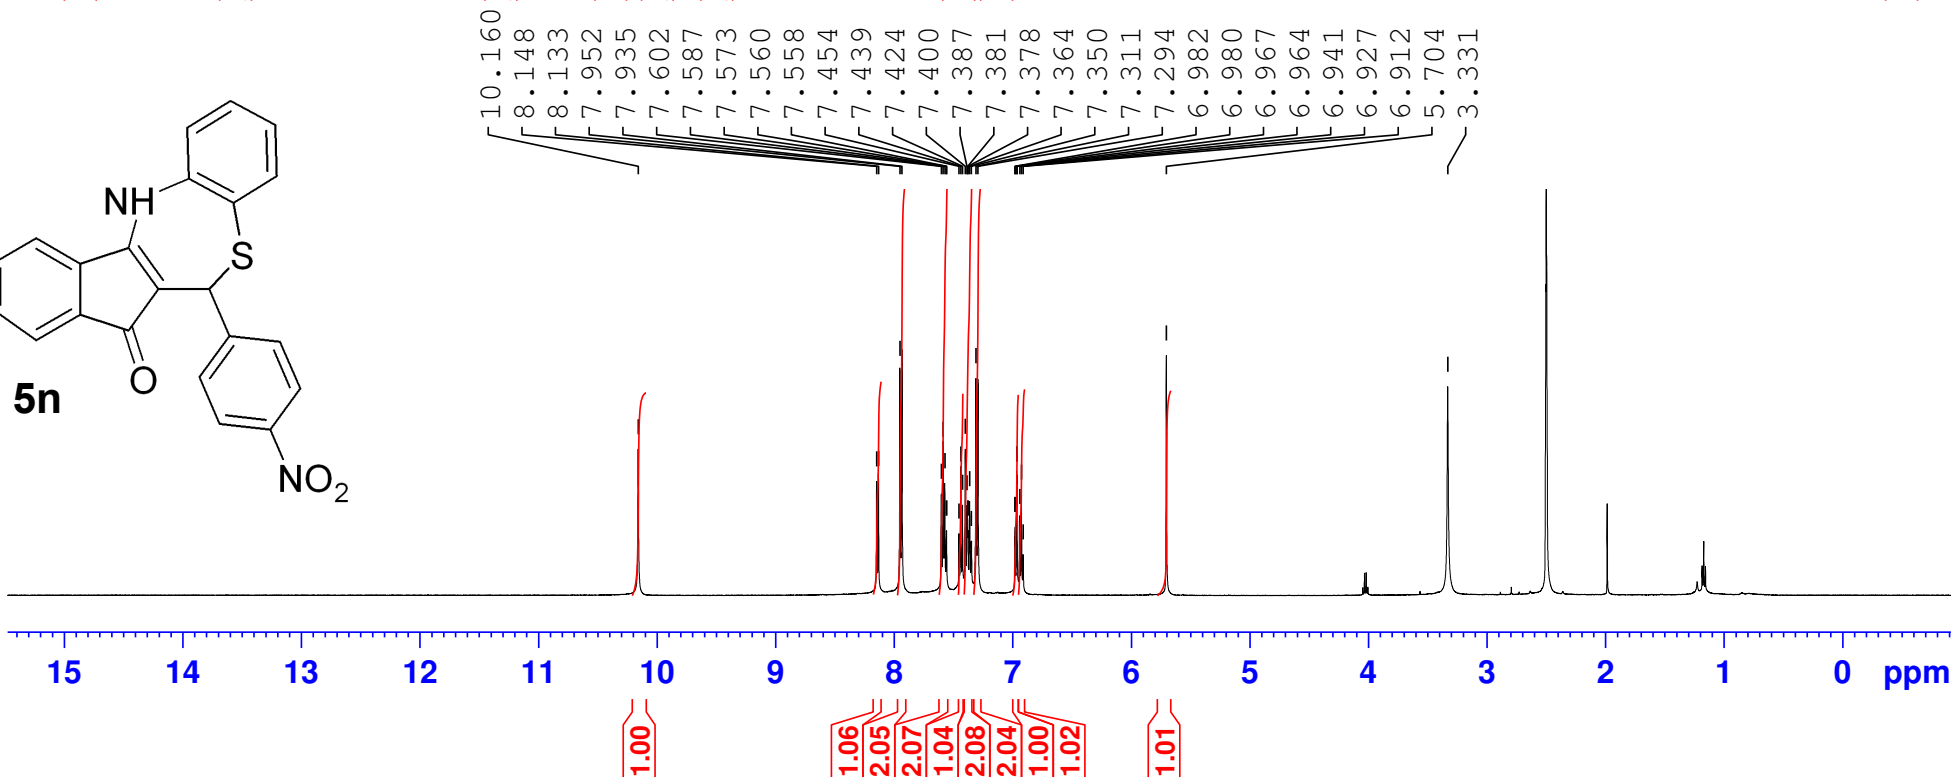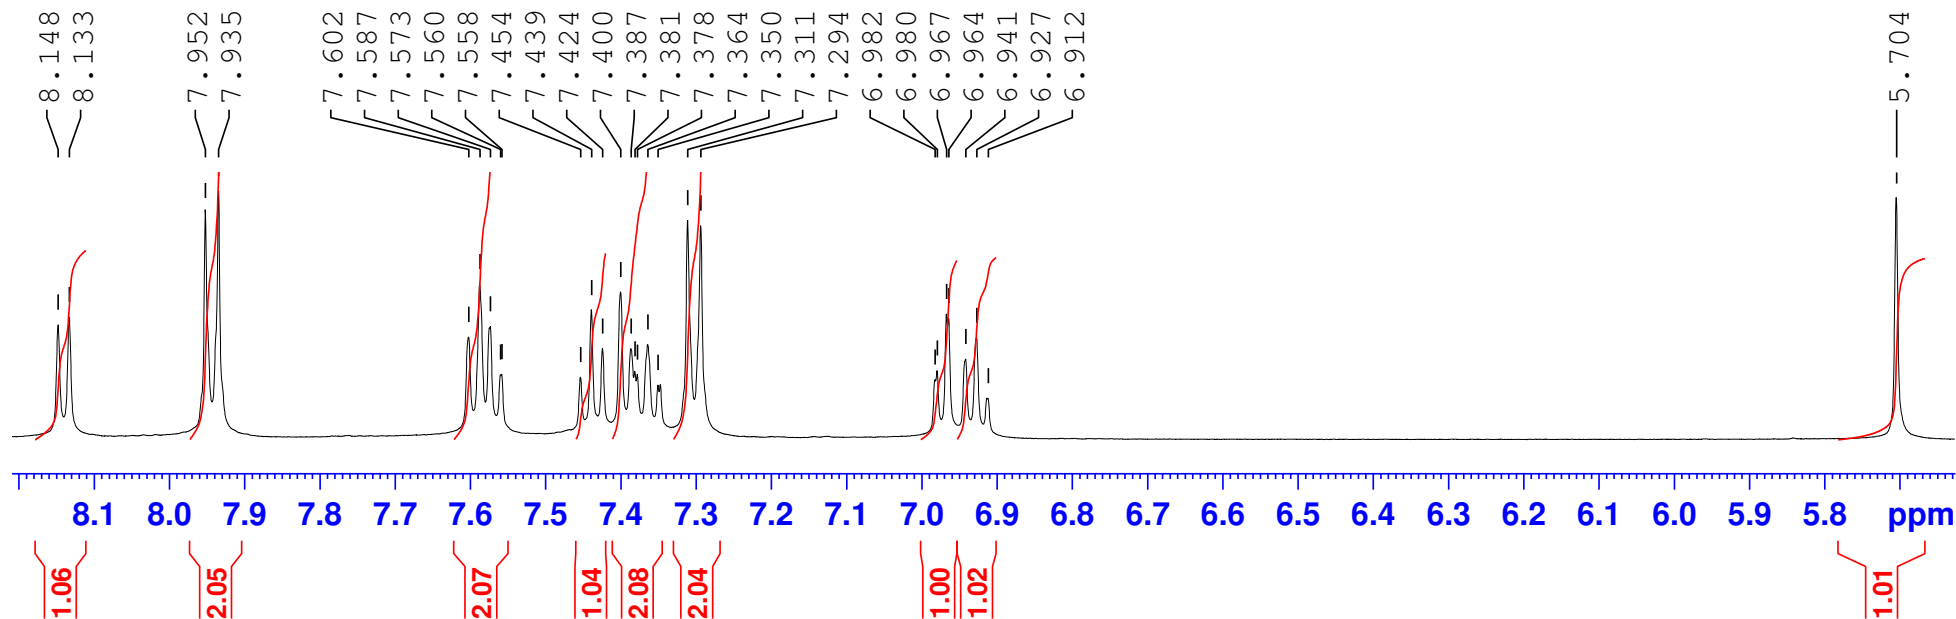

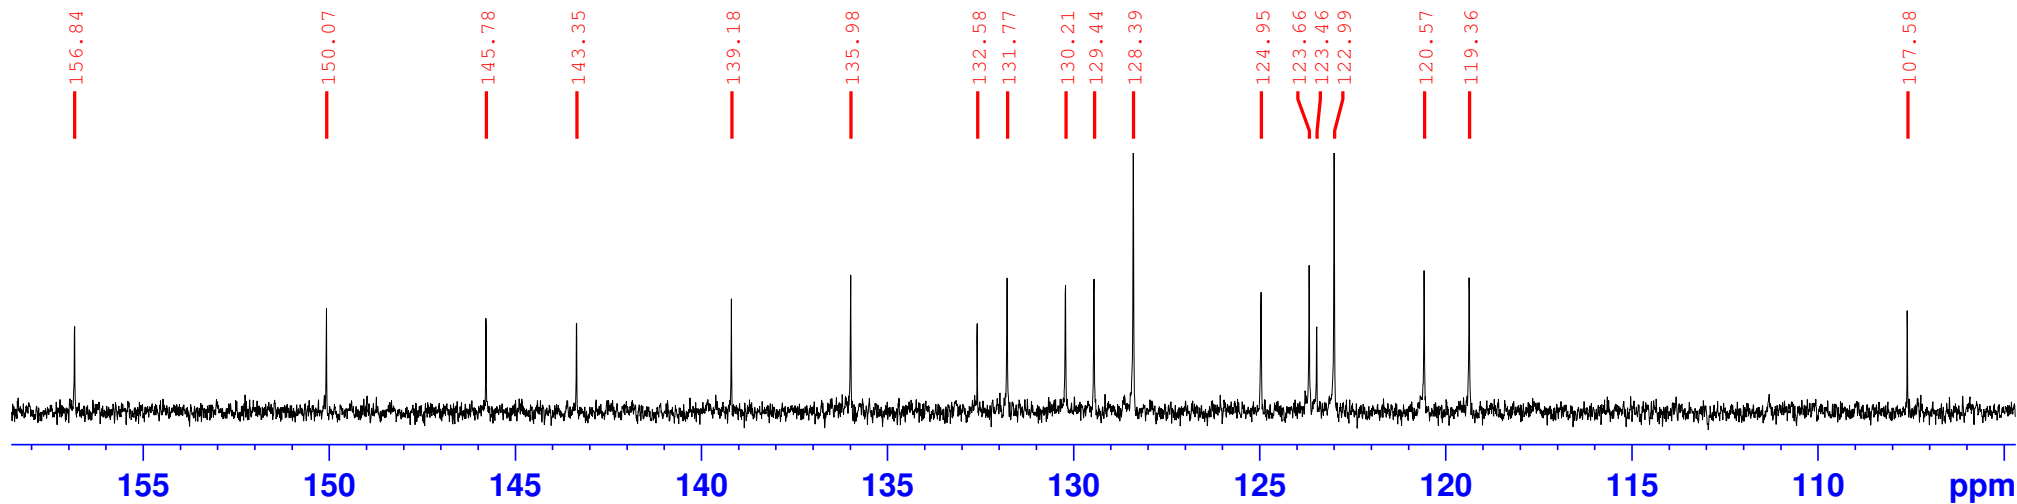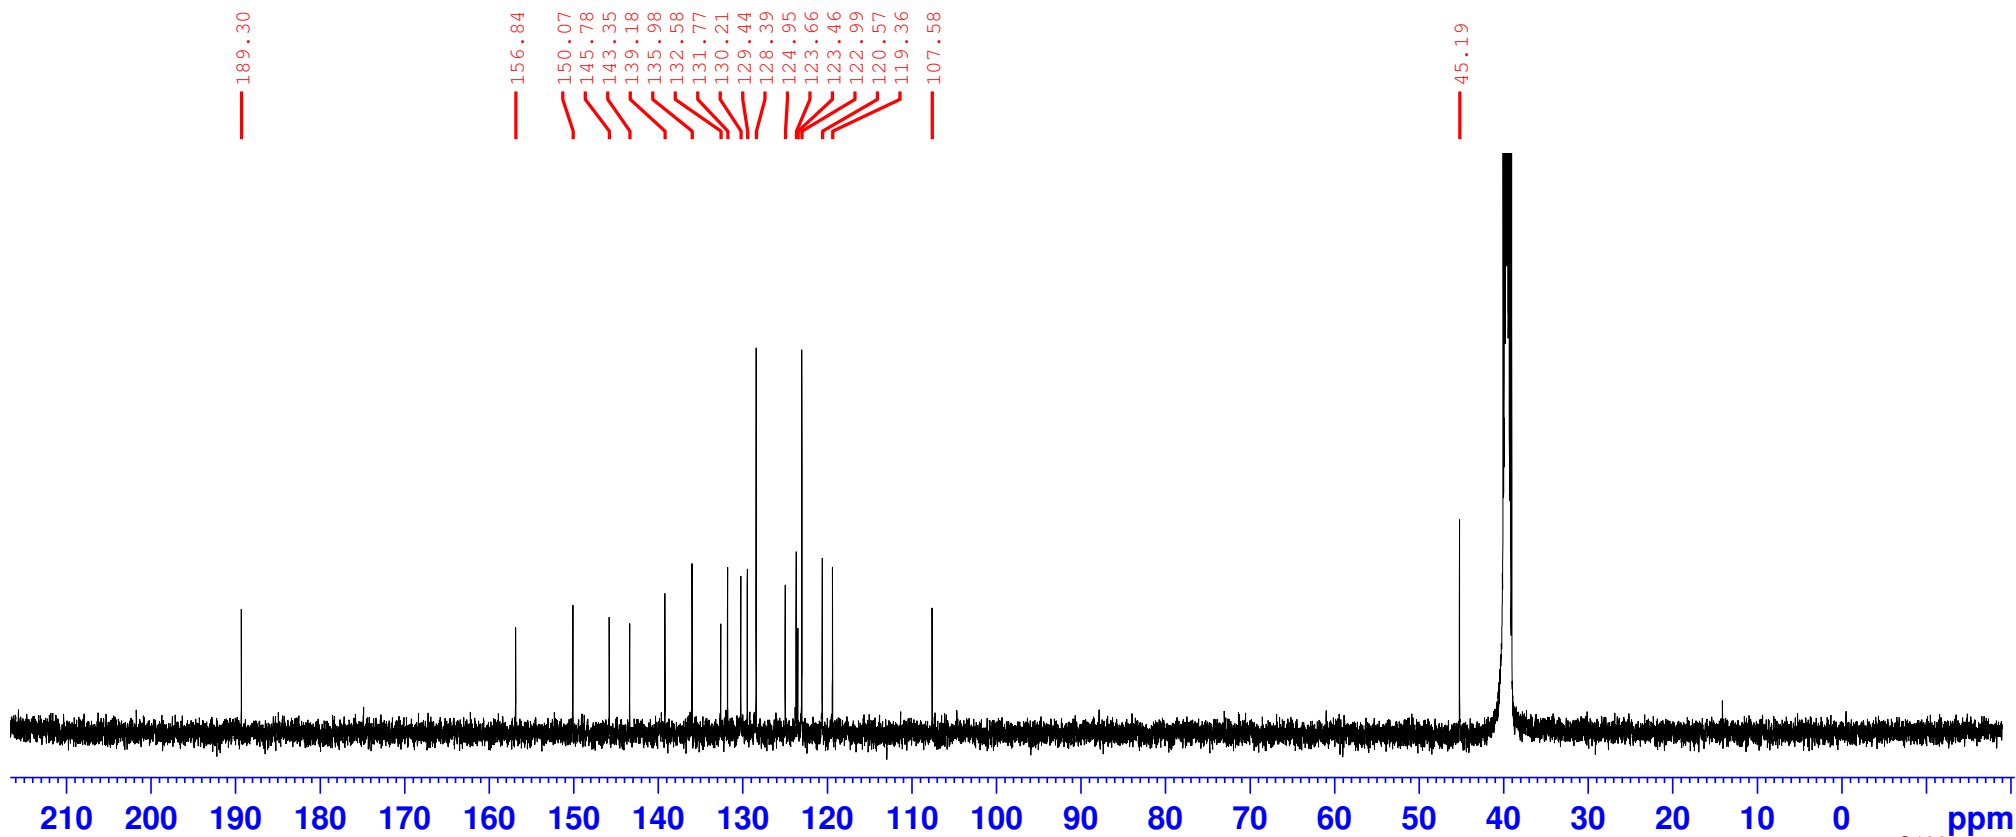

# User Spectrum Plot Report

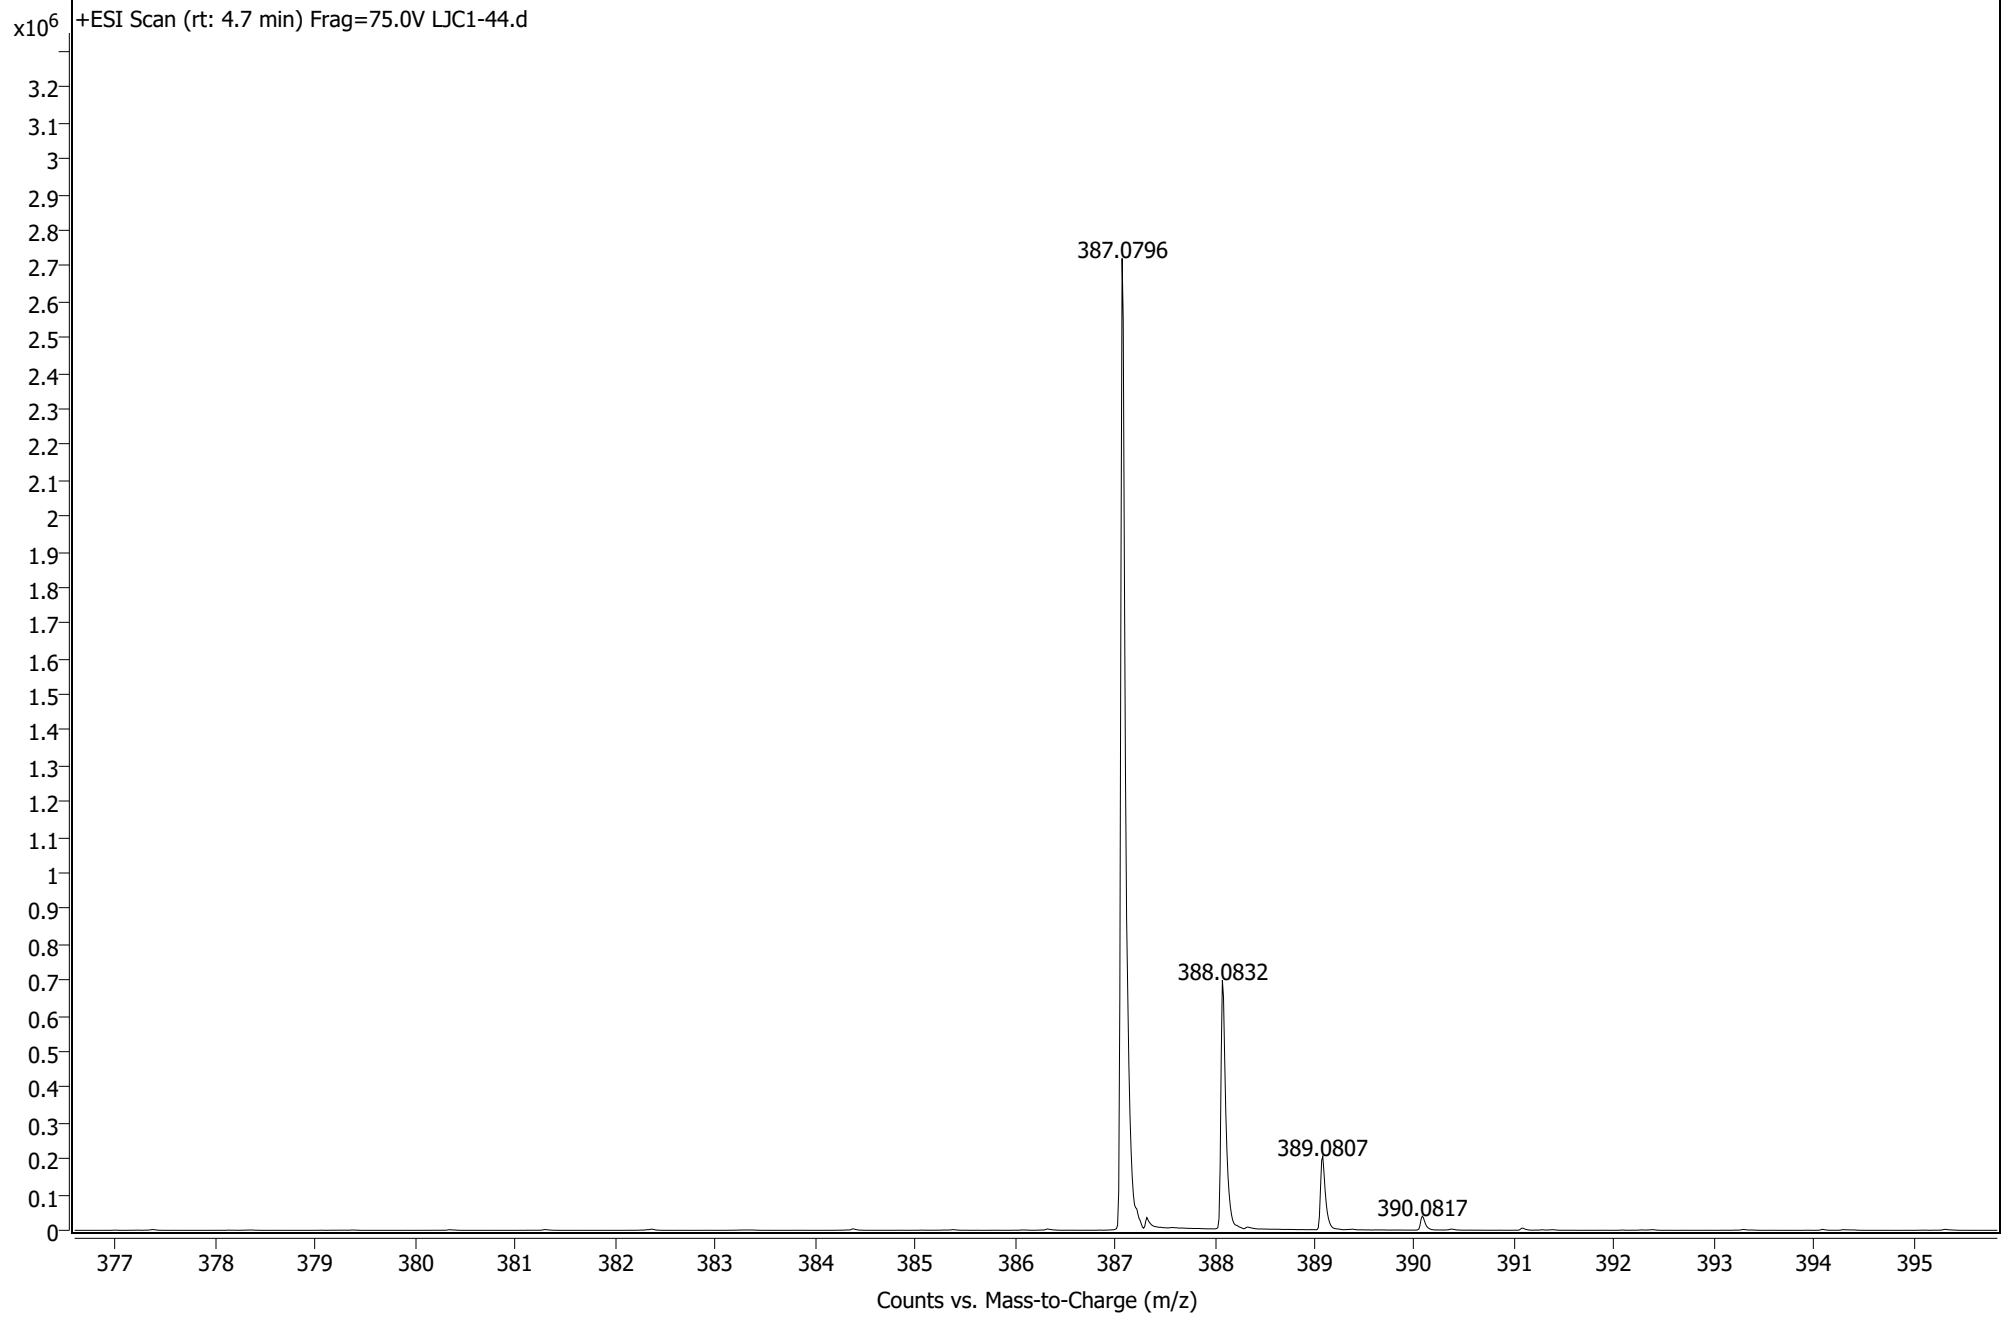

Sample Name: LJC1-44

```

=====
Acq. Operator   : SYSTEM                      Seq. Line :    4
Sample Operator : SYSTEM
Acq. Instrument : 1260Infinity2              Location  : P1-C-03
Injection Date  : 3/24/2020 3:21:09 PM       Inj       :    1
                                           Inj Volume: 50.000 µl
Method          : C:\Users\Public\Documents\ChemStation\1\Data\Huihua-MC 2020-03-24 14-05-23
                  \MC-SMALL MOLE.M (Sequence Method)
Last changed    : 2/19/2020 11:54:04 AM by SYSTEM
Additional Info : Peak(s) manually integrated
=====

```

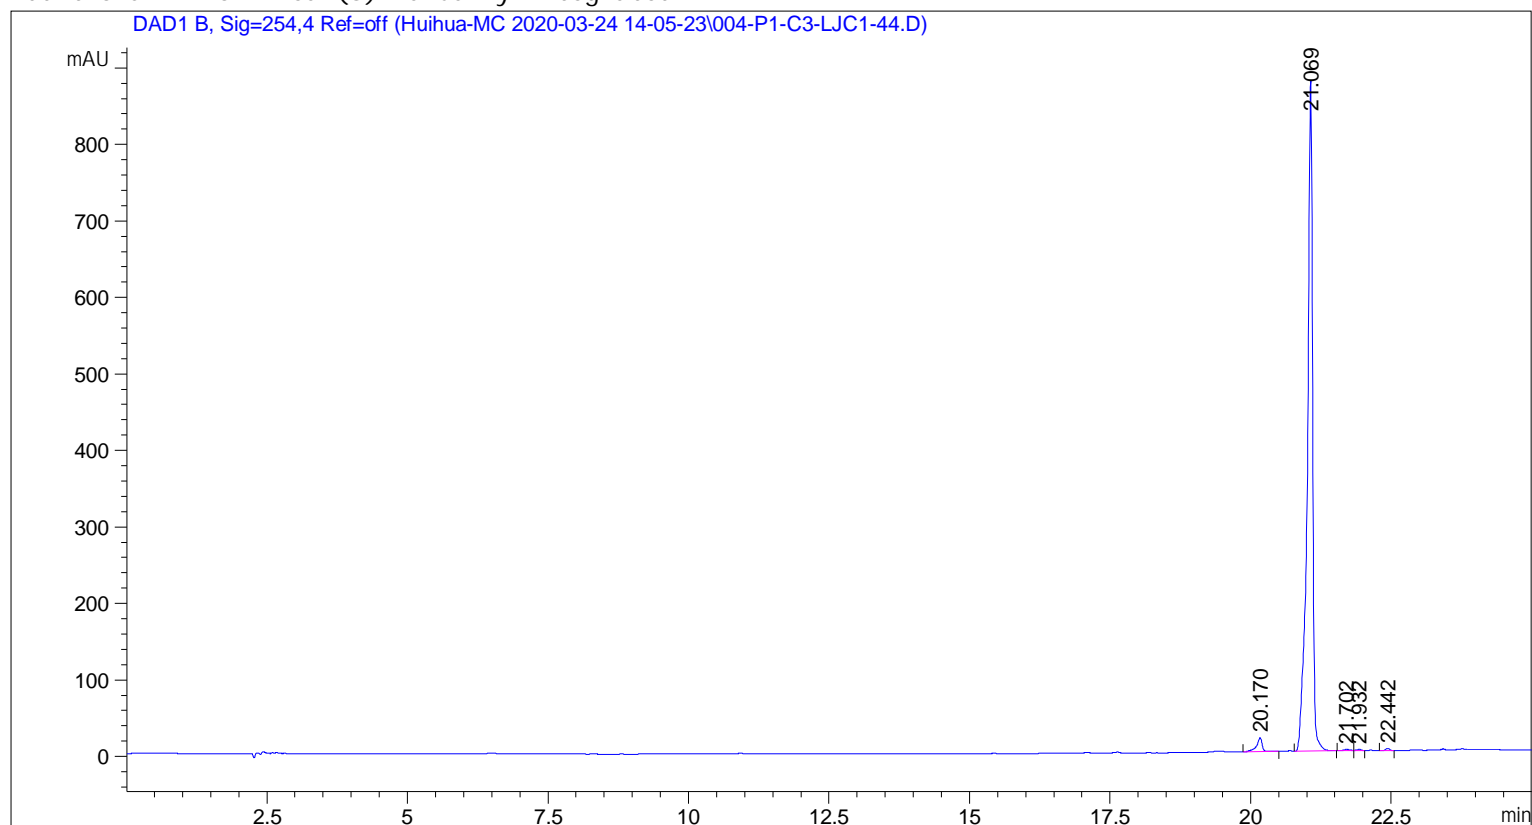

```

=====
                          Area Percent Report
=====

```

```

Sorted By      :      Signal
Multiplier     :      1.0000
Dilution       :      1.0000
Use Multiplier & Dilution Factor with ISTDs

```

Signal 1: DAD1 B, Sig=254,4 Ref=off

| Peak # | RetTime [min] | Type | Width [min] | Area [mAU*s] | Height [mAU] | Area %  |
|--------|---------------|------|-------------|--------------|--------------|---------|
| 1      | 20.170        | BV R | 0.1018      | 131.25250    | 18.27964     | 2.2326  |
| 2      | 21.069        | BB   | 0.0939      | 5708.81201   | 877.07391    | 97.1056 |
| 3      | 21.702        | BV   | 0.1138      | 13.58999     | 1.62136      | 0.2312  |
| 4      | 21.932        | VV   | 0.1097      | 10.36470     | 1.51650      | 0.1763  |
| 5      | 22.442        | BB   | 0.0768      | 14.95388     | 2.96631      | 0.2544  |

```
Totals :                      5878.97308  901.45772
```

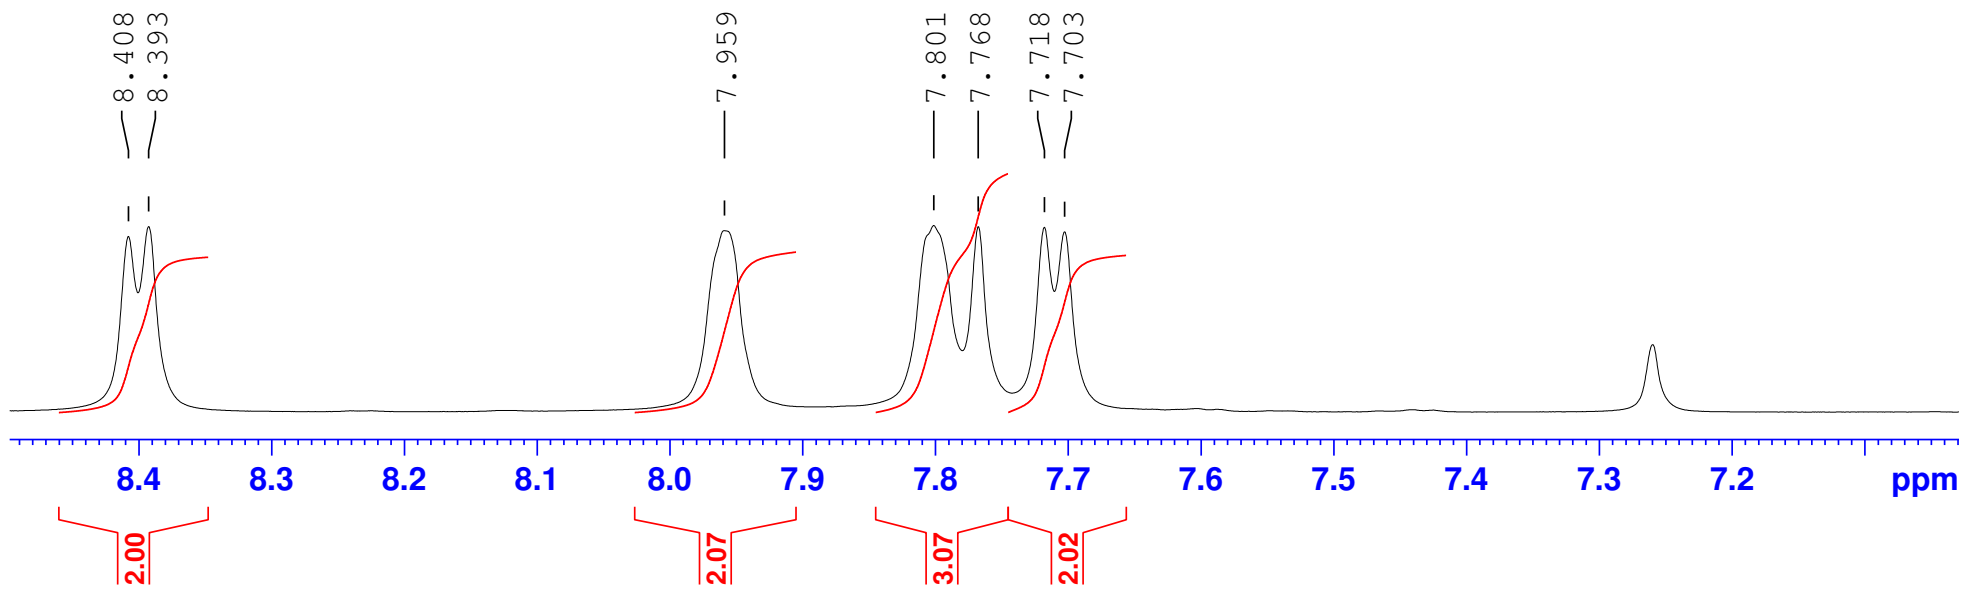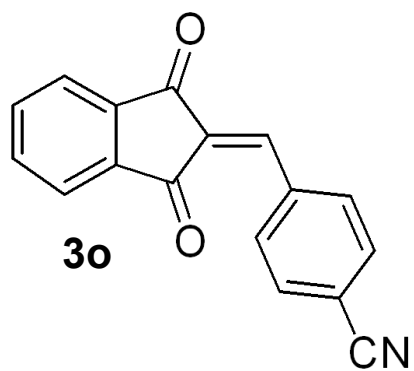

8.408  
8.393  
7.959  
7.801  
7.768  
7.718  
7.703

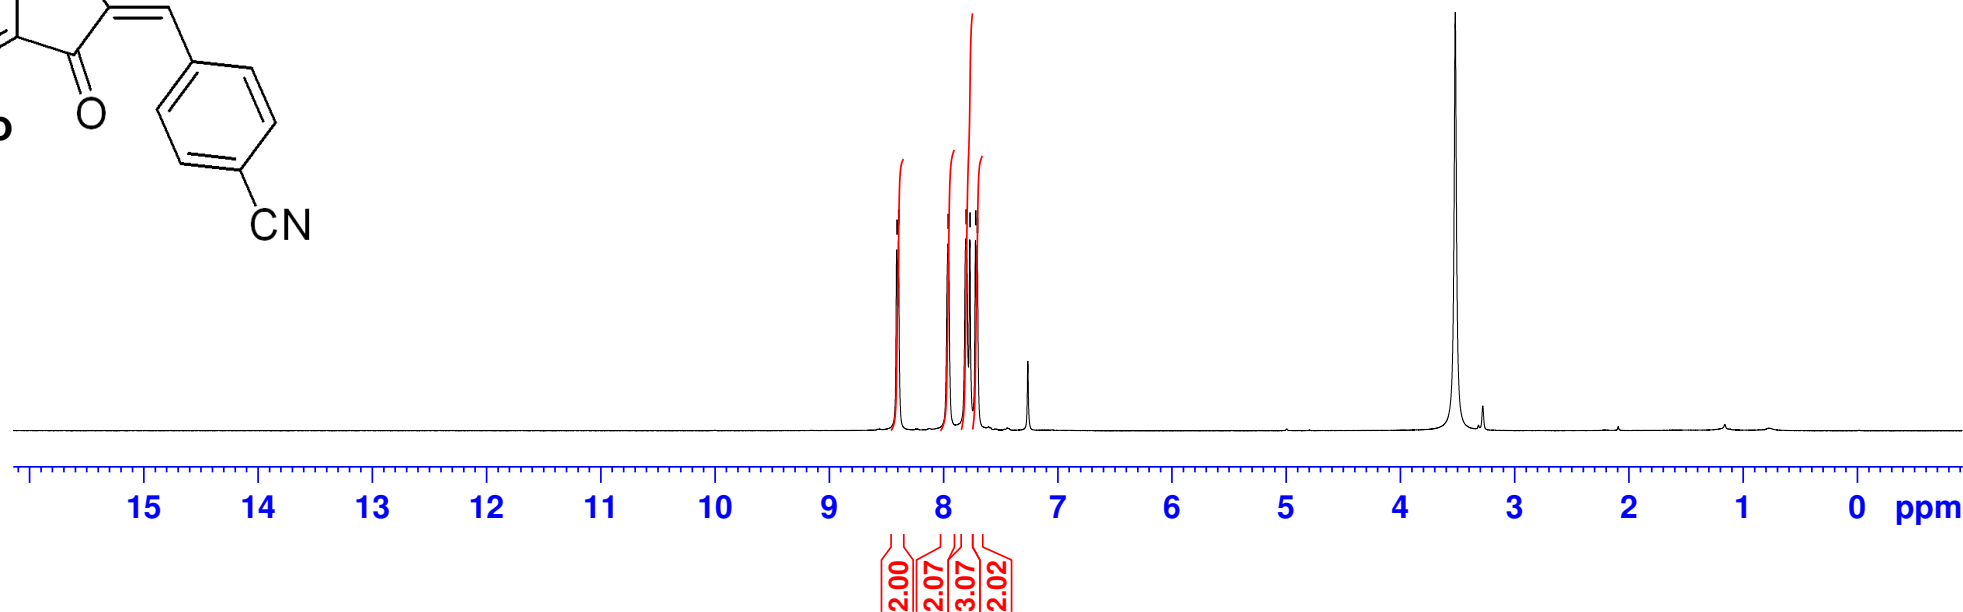

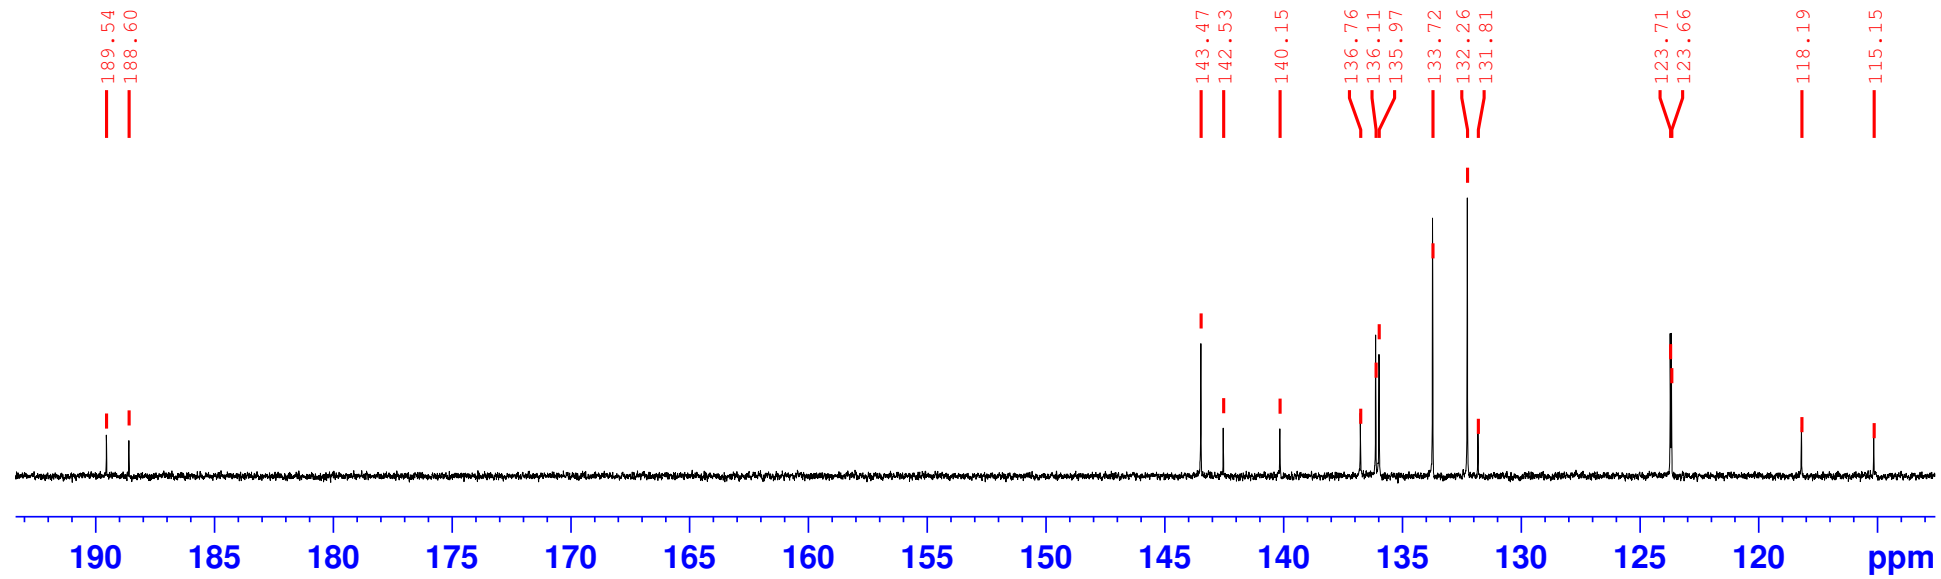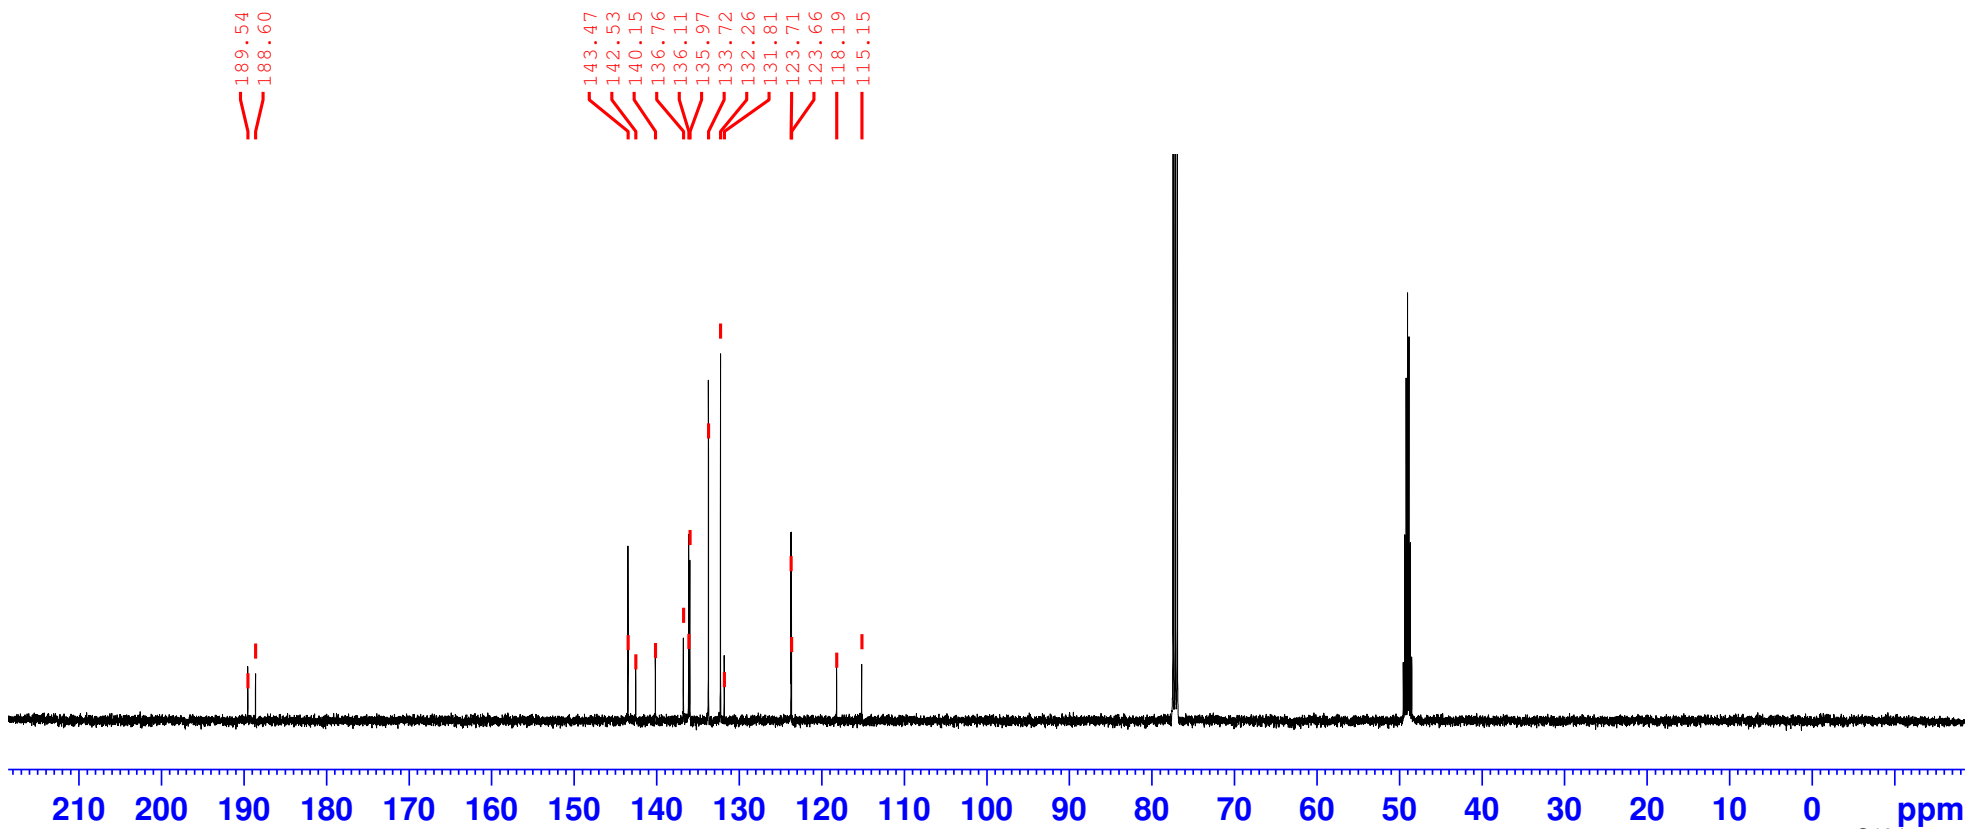



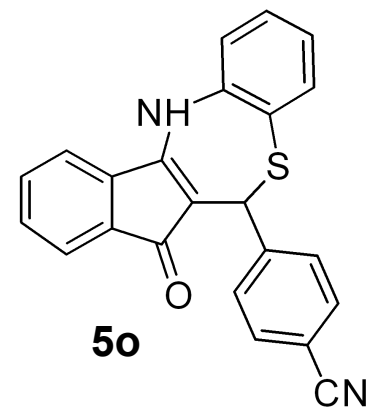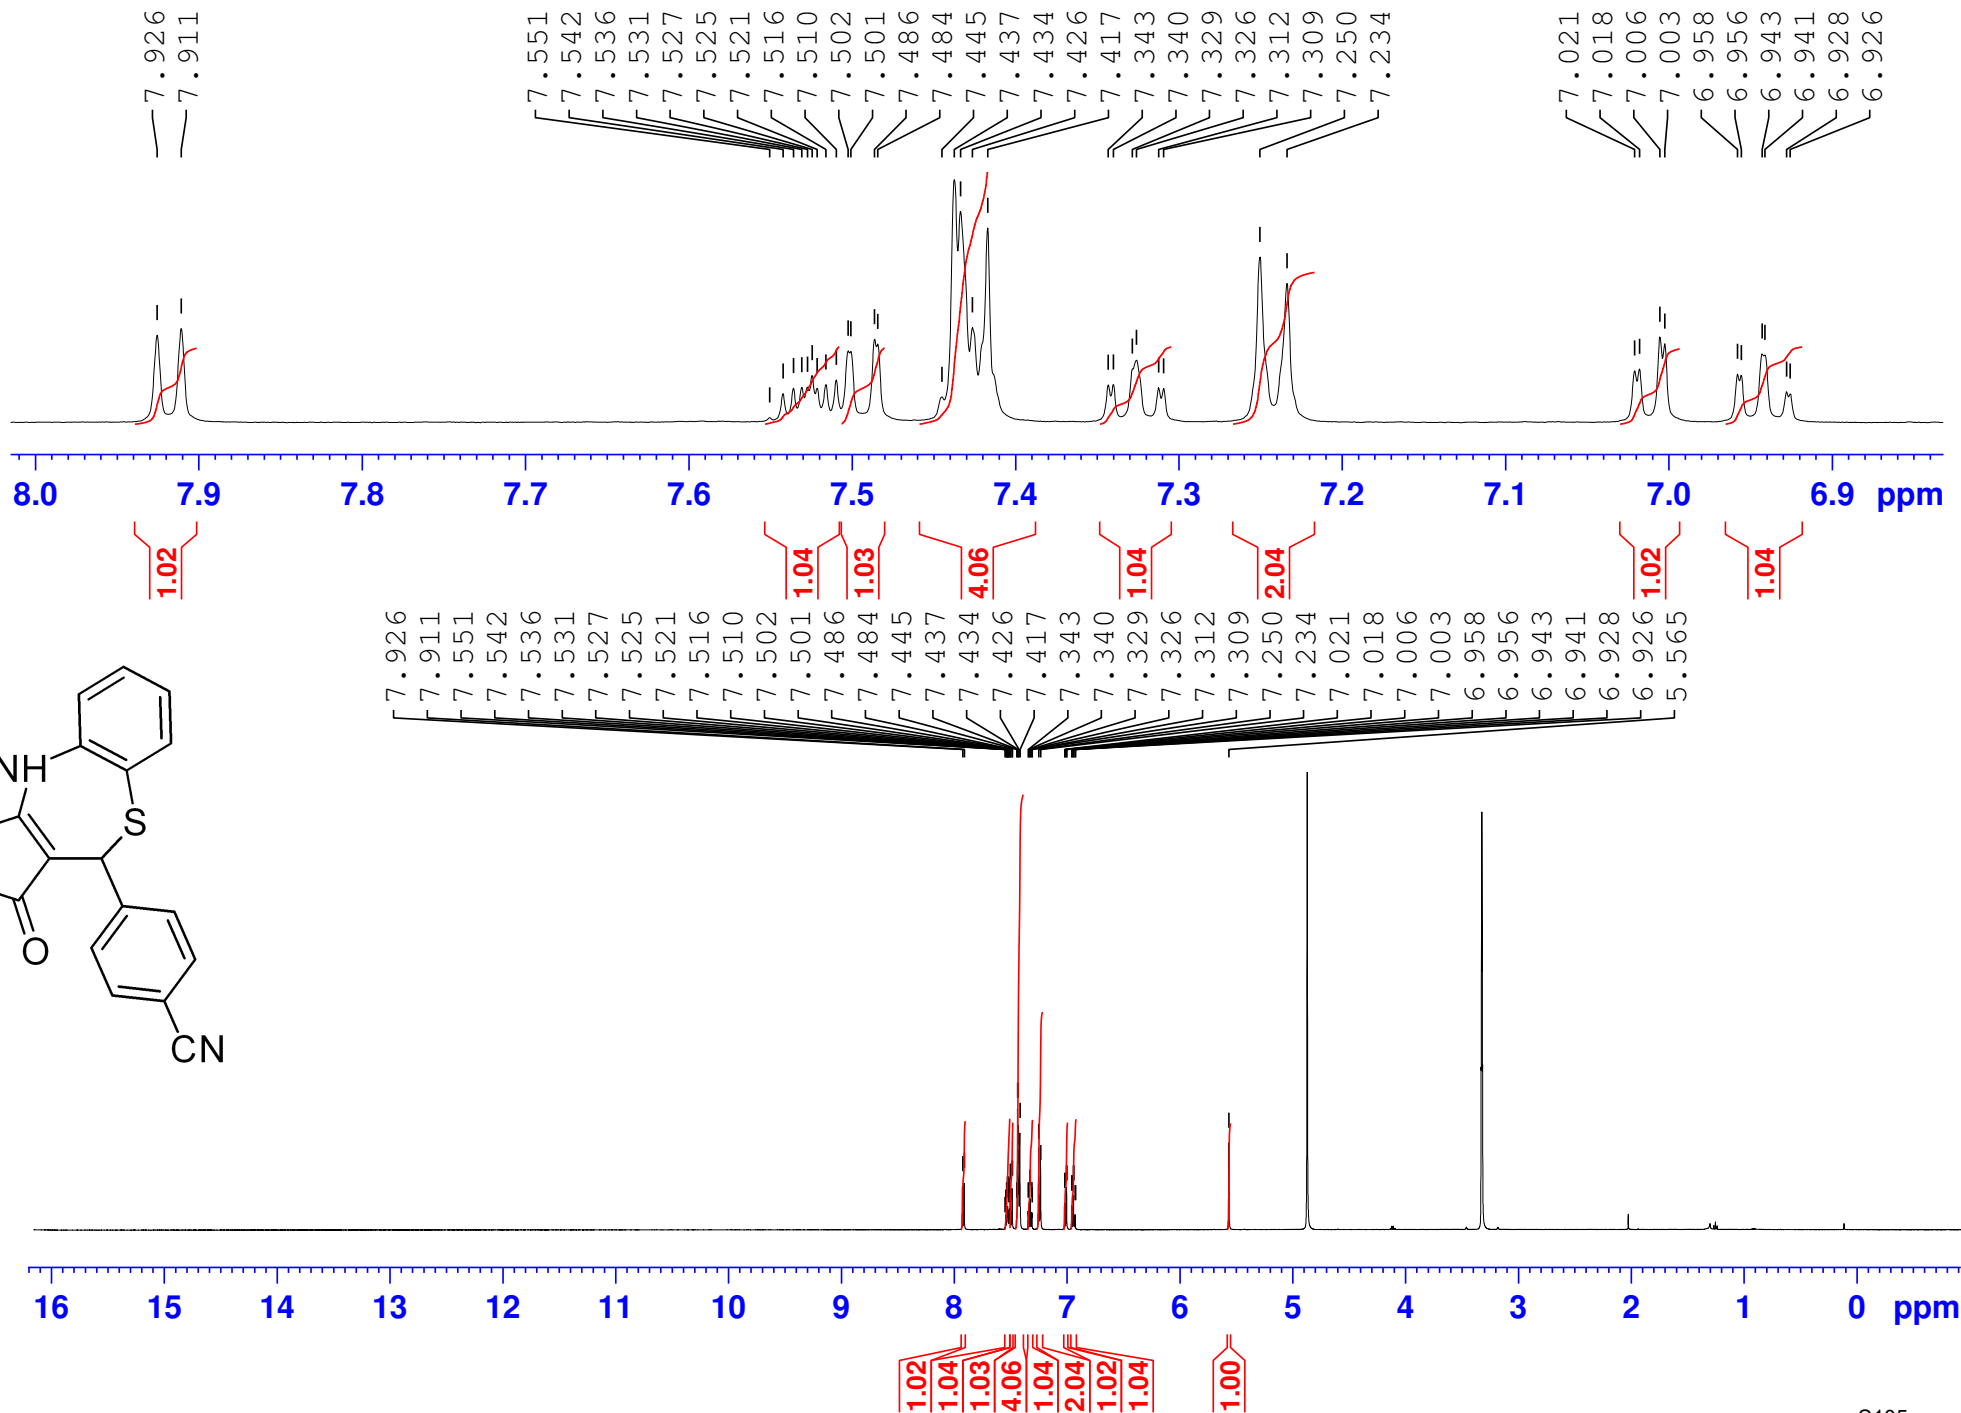

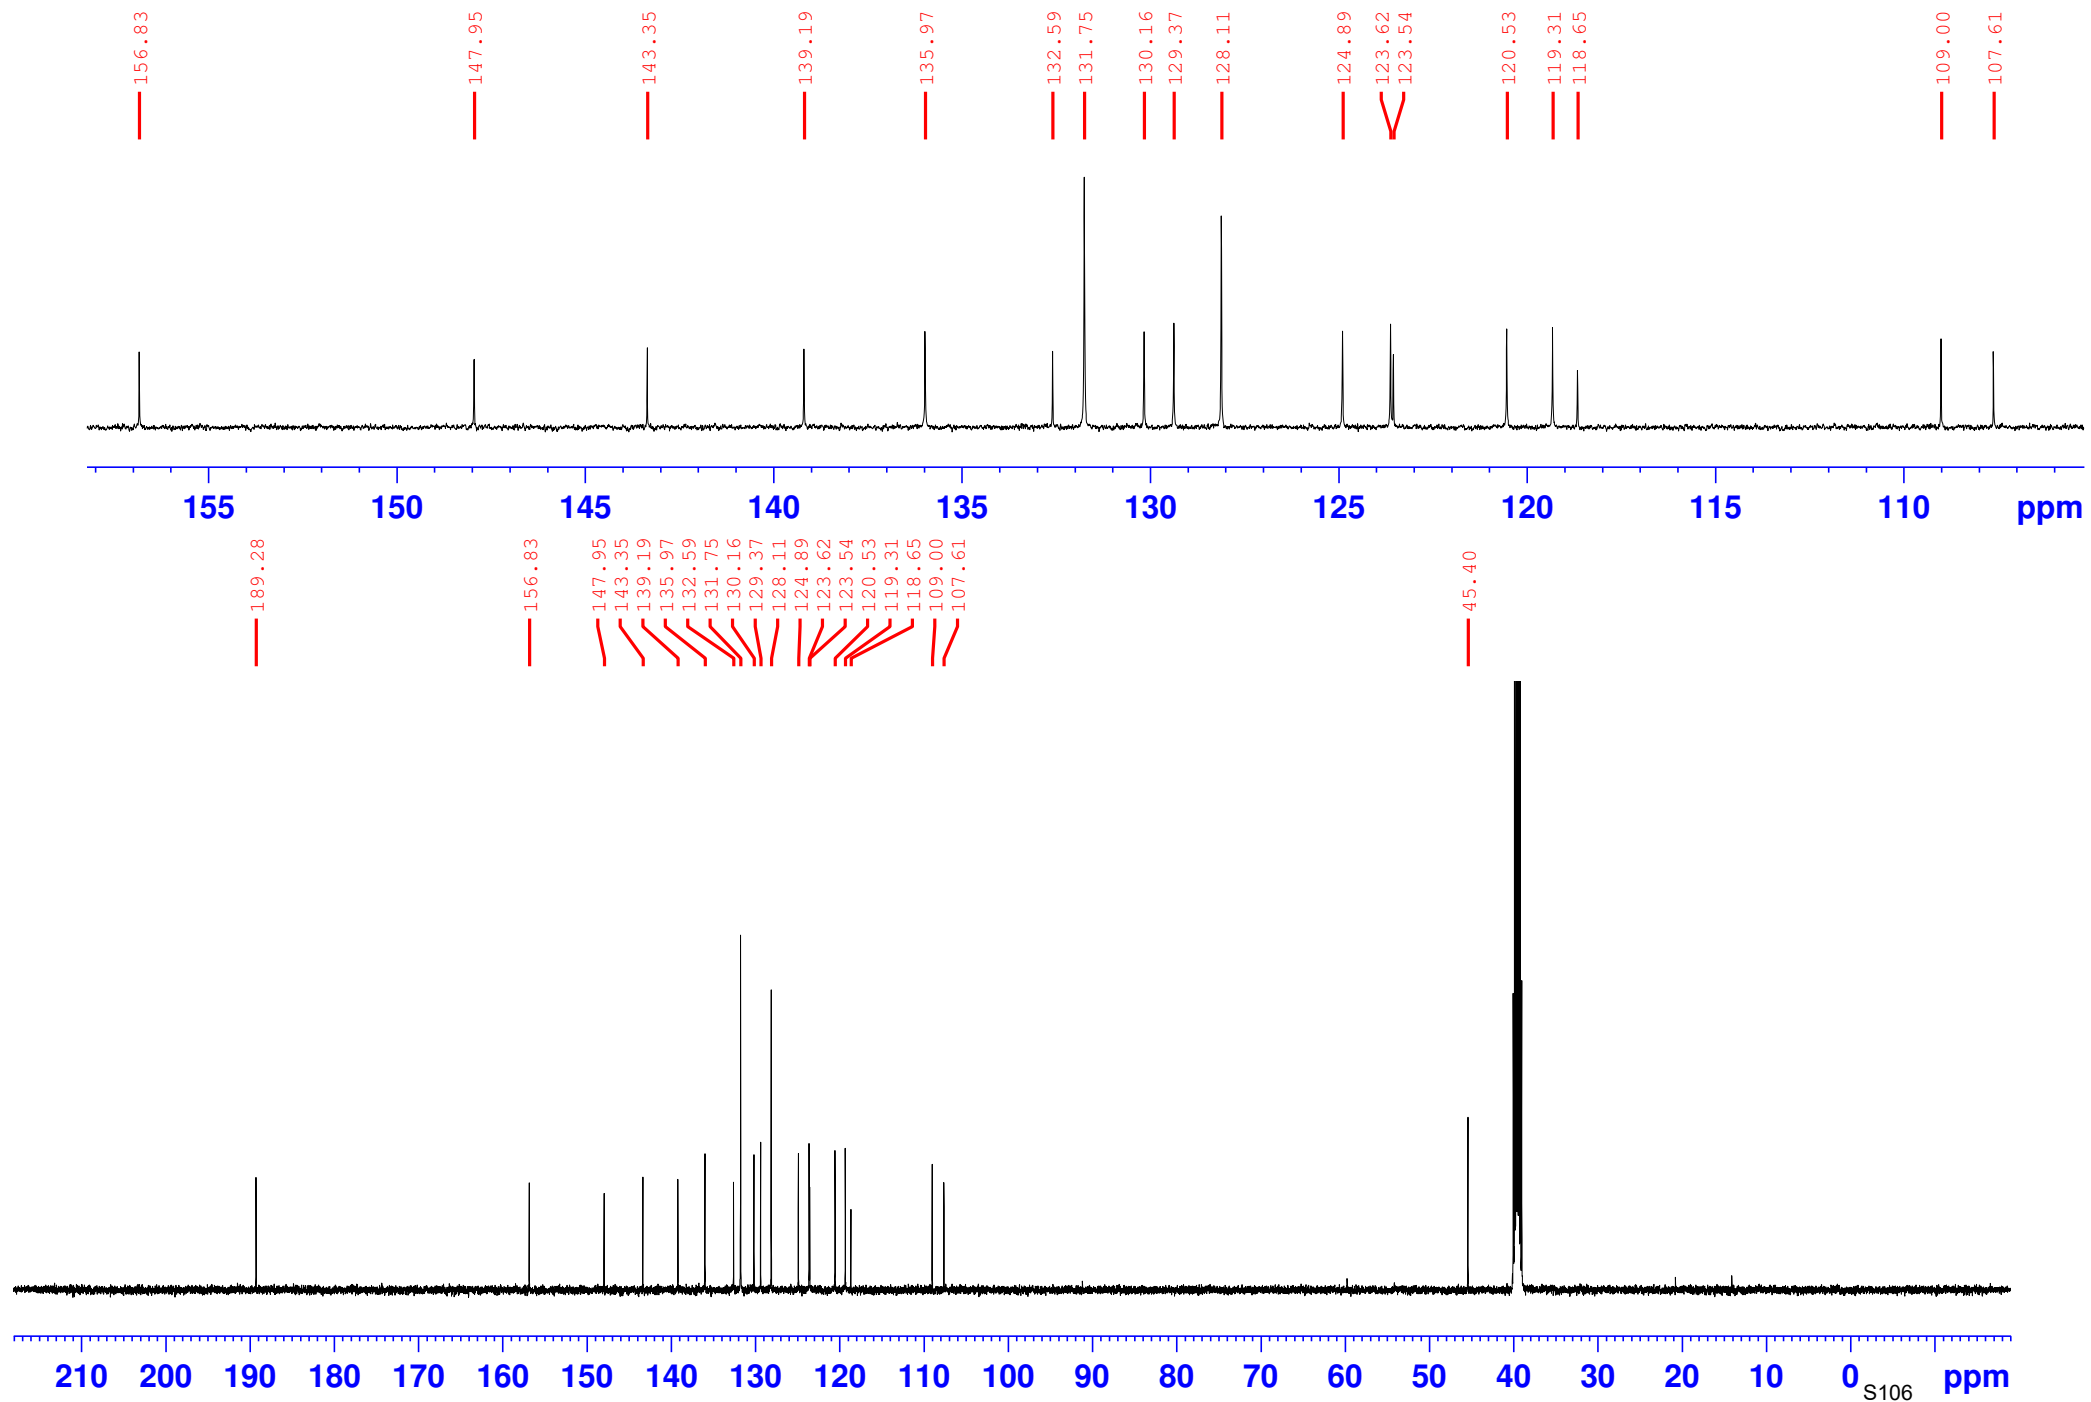

# User Spectrum Plot Report

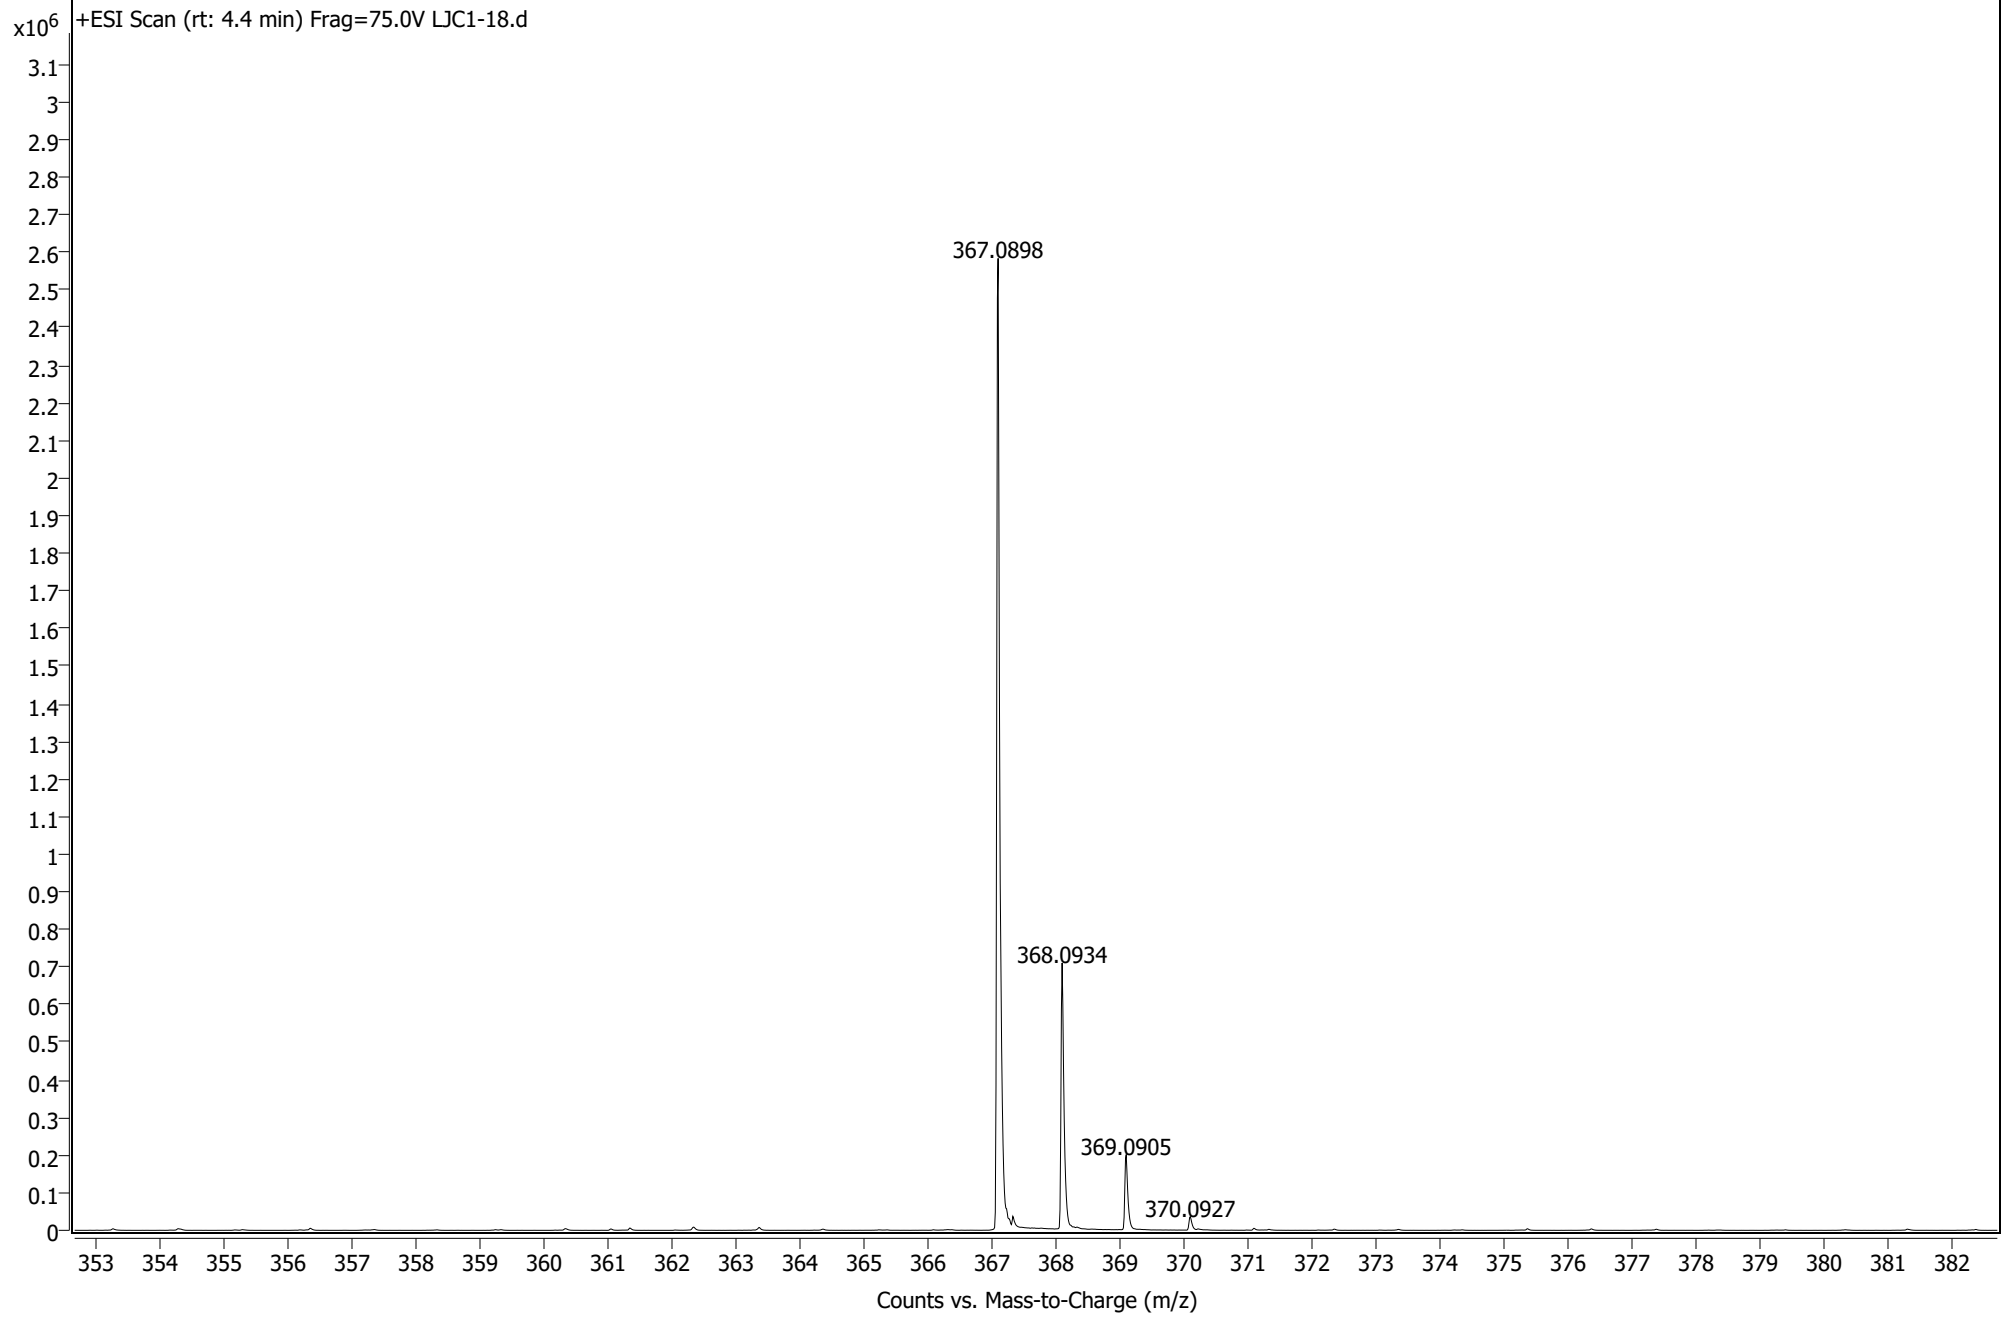

Sample Name: LJC 1-18

```

=====
Acq. Operator   : SYSTEM                      Seq. Line :   11
Sample Operator : SYSTEM
Acq. Instrument : 1260Infinity2              Location  : P1-B-03
Injection Date  : 2/20/2020 3:18:51 PM       Inj       :    1
                                           Inj Volume: 50.000 µl

Method          : C:\Users\Public\Documents\ChemStation\1\Data\Huihua-MC 2020-02-20 10-53-28
                  \MC-SMALL MOLE.M (Sequence Method)
Last changed    : 2/19/2020 11:54:04 AM by SYSTEM
Additional Info  : Peak(s) manually integrated
    
```

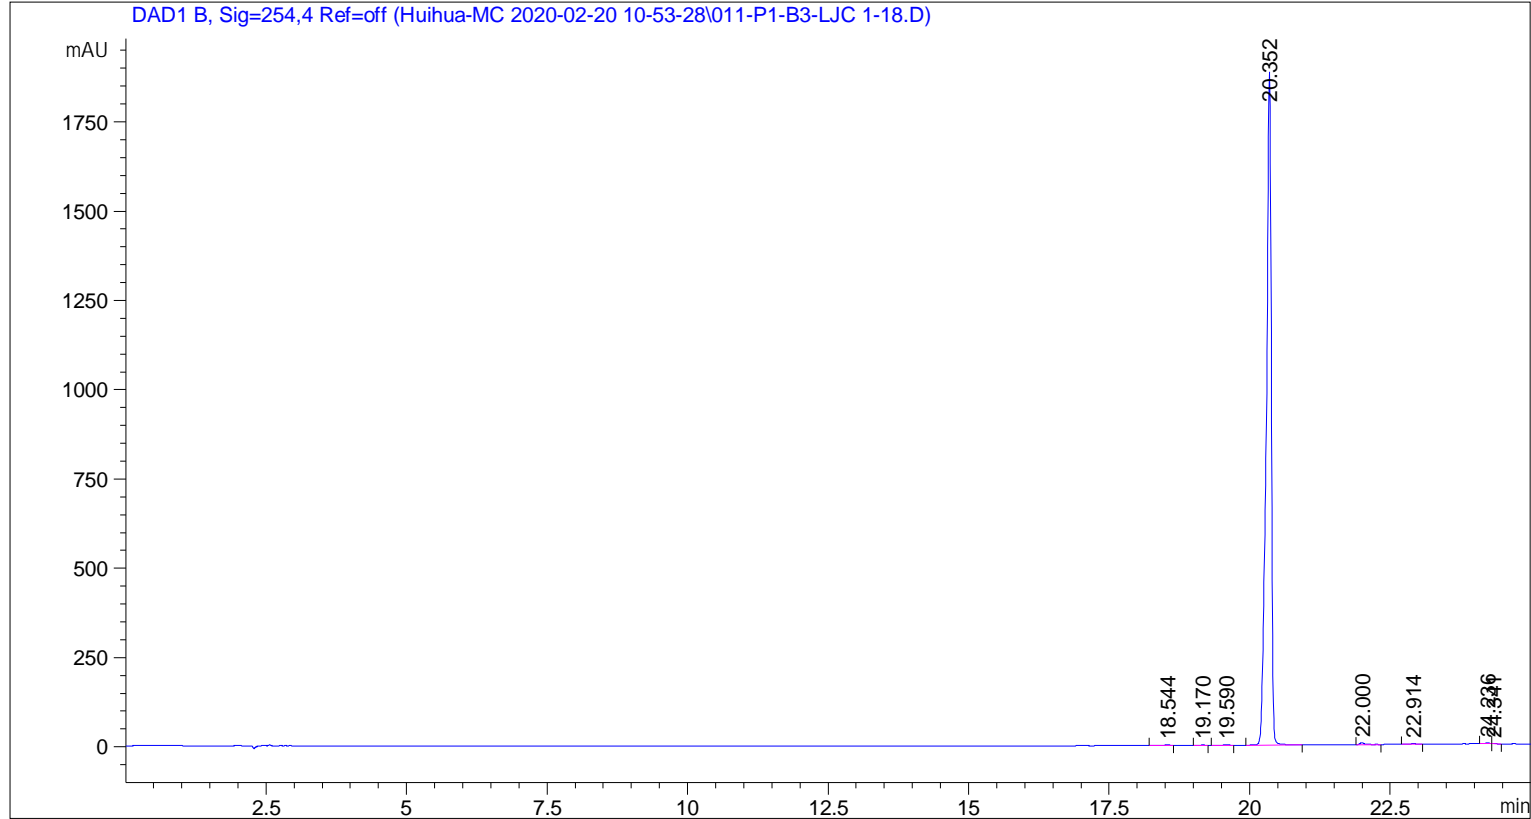

=====  
 Area Percent Report  
 =====

```

Sorted By      :      Signal
Multiplier     :      1.0000
Dilution       :      1.0000
Use Multiplier & Dilution Factor with ISTDs
    
```

Signal 1: DAD1 B, Sig=254,4 Ref=off

| Peak # | RetTime [min] | Type | Width [min] | Area [mAU*s] | Height [mAU] | Area %  |
|--------|---------------|------|-------------|--------------|--------------|---------|
| 1      | 18.544        | BB   | 0.1038      | 14.88345     | 2.02333      | 0.1274  |
| 2      | 19.170        | BB   | 0.0829      | 6.15387      | 1.10693      | 0.0527  |
| 3      | 19.590        | BB   | 0.0915      | 9.87105      | 1.56649      | 0.0845  |
| 4      | 20.352        | BB   | 0.0895      | 1.15841e4    | 1889.74011   | 99.1602 |
| 5      | 22.000        | BV R | 0.0809      | 30.08016     | 5.40855      | 0.2575  |
| 6      | 22.914        | BB   | 0.0760      | 16.19878     | 3.14833      | 0.1387  |
| 7      | 24.236        | BV   | 0.0726      | 15.81355     | 3.15030      | 0.1354  |
| 8      | 24.341        | VB   | 0.0748      | 5.10453      | 1.04887      | 0.0437  |

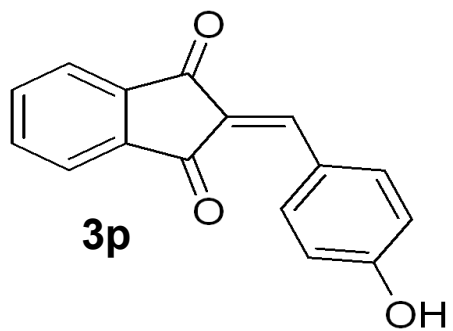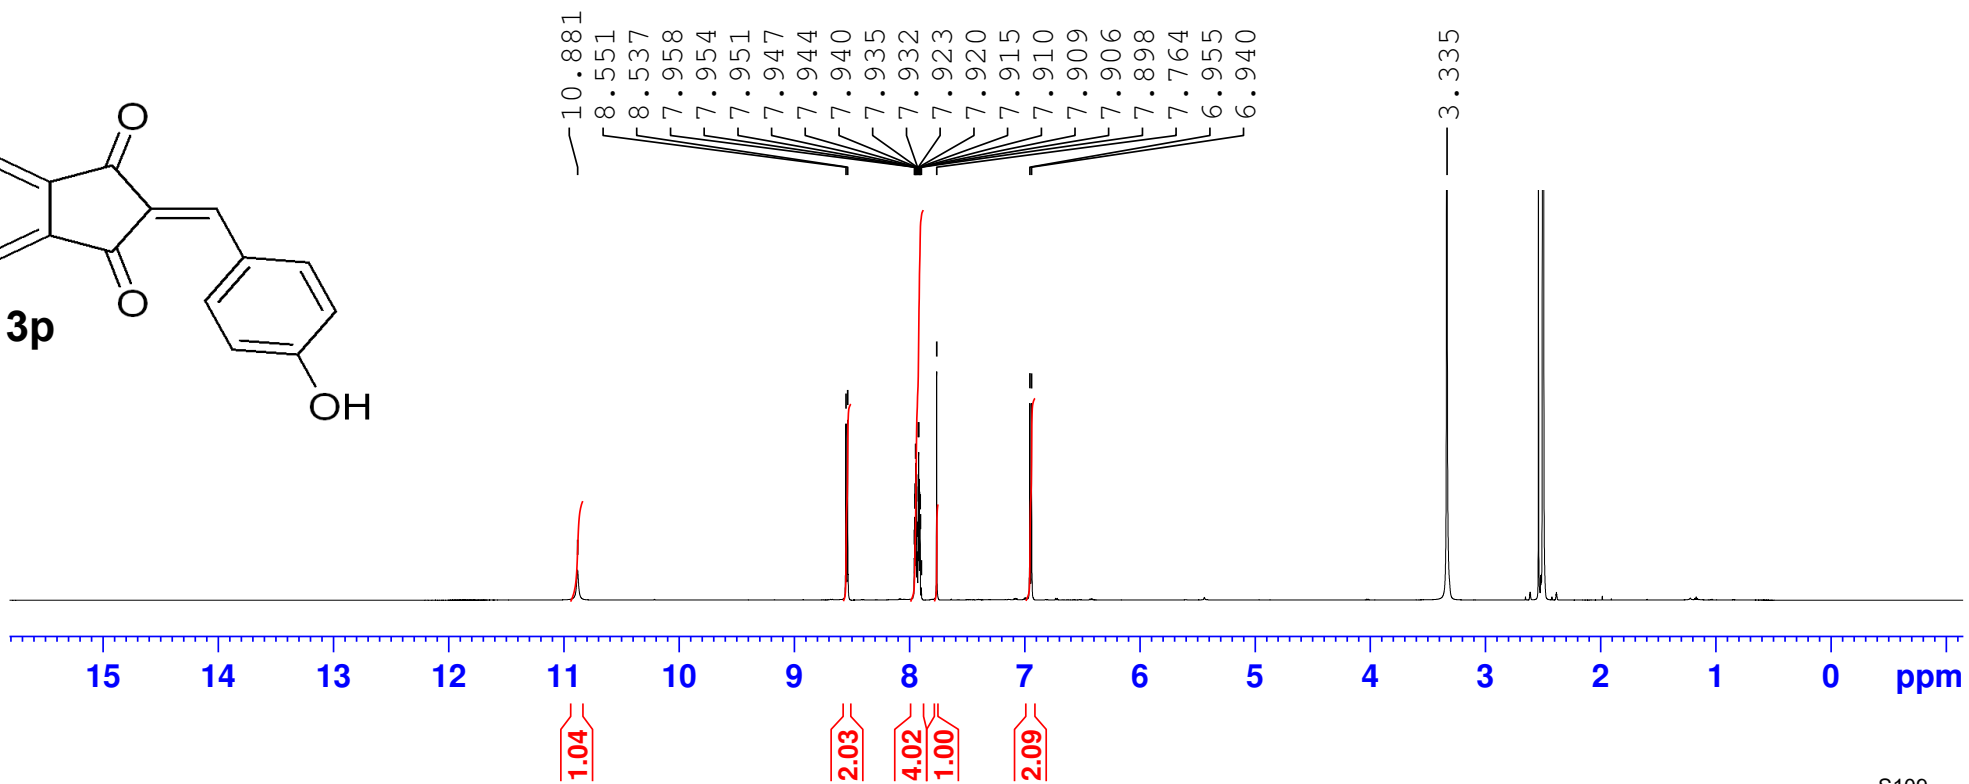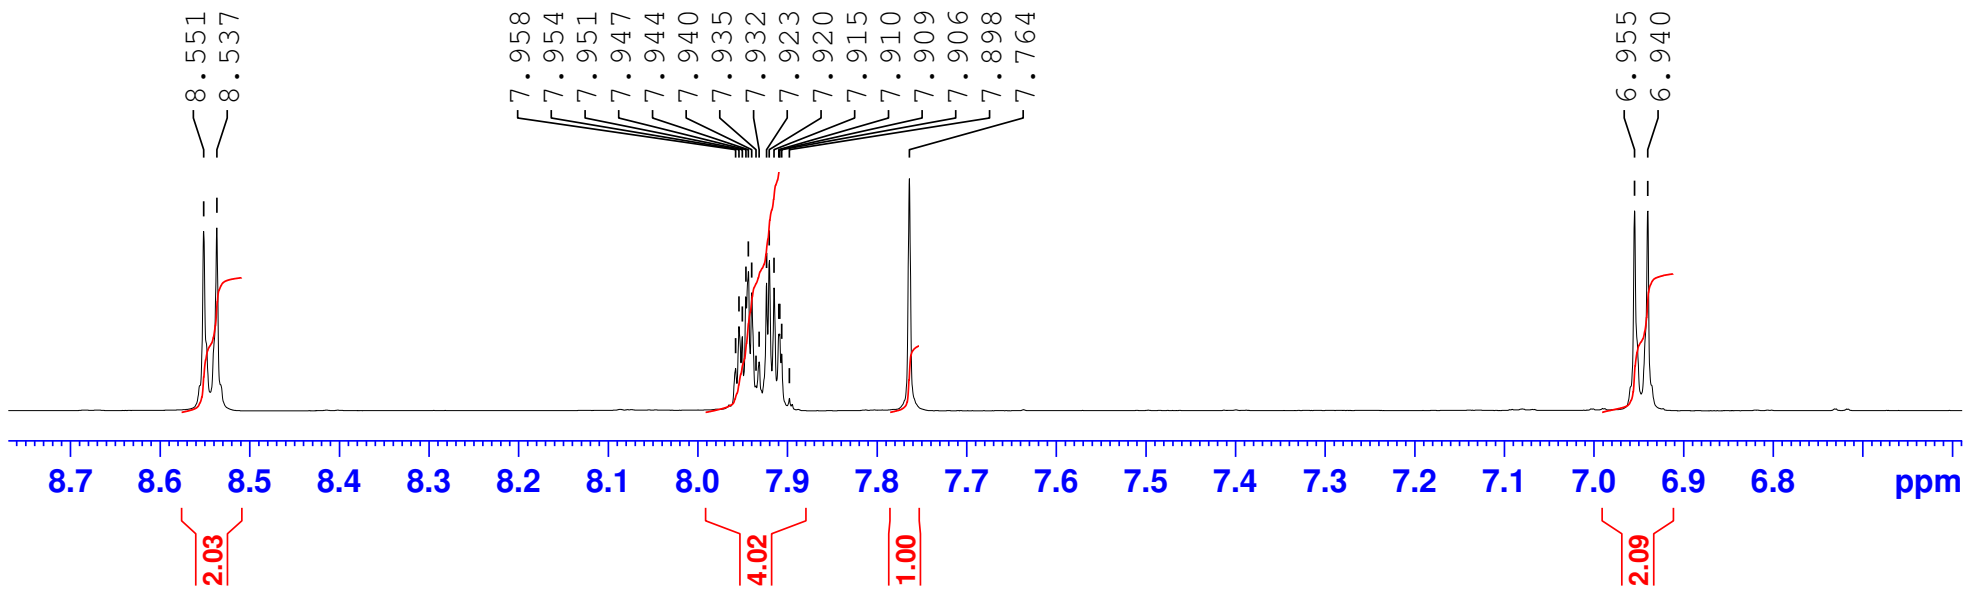

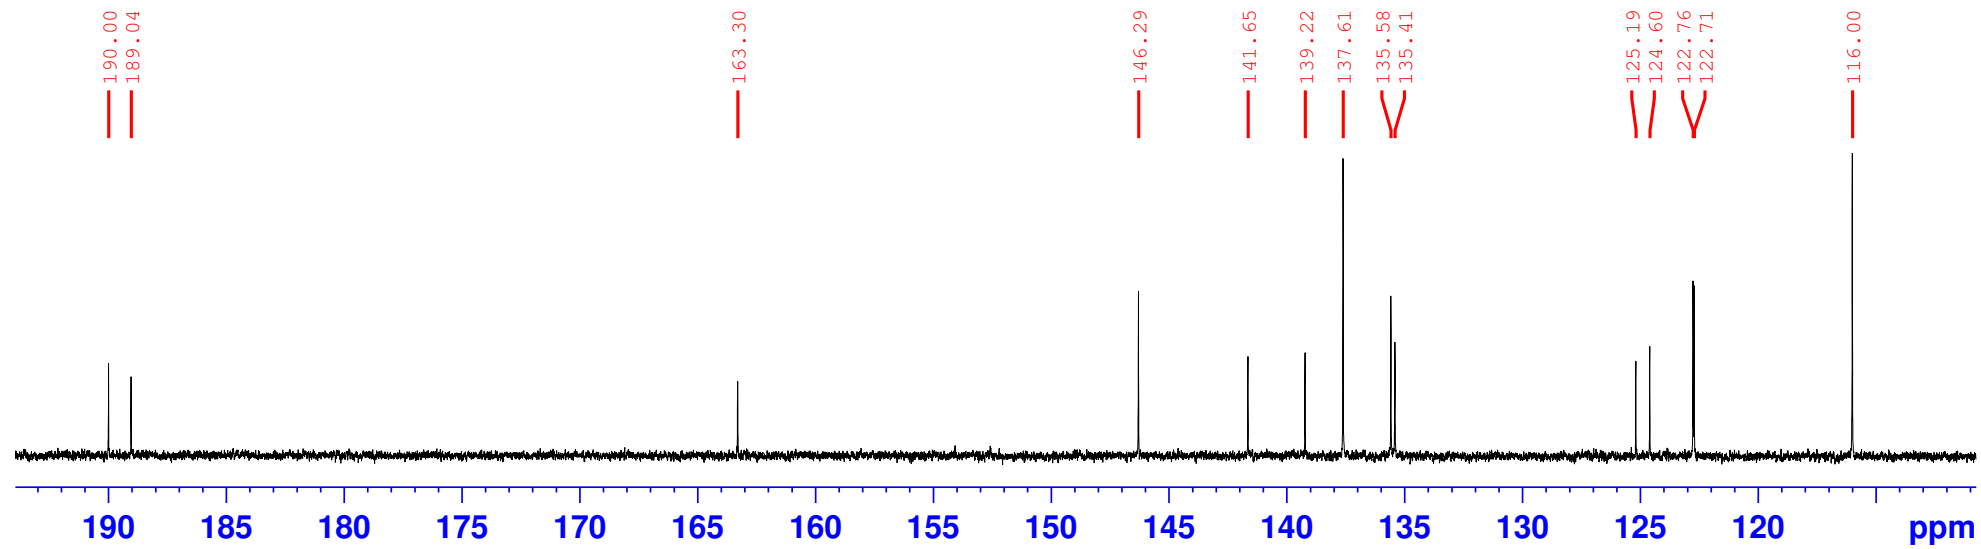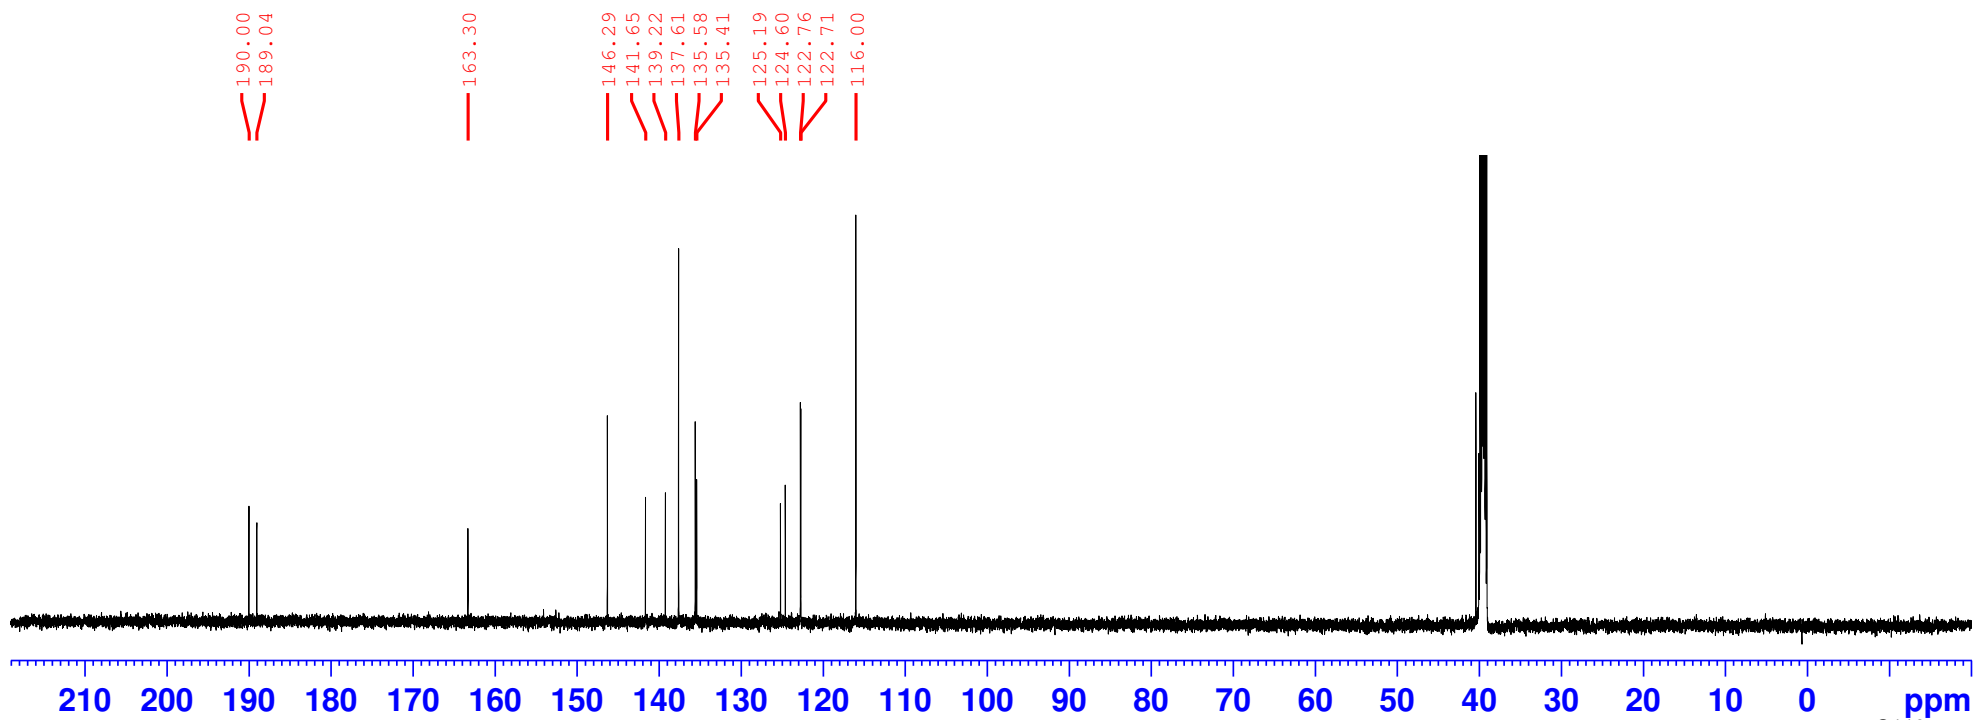

Sample Name: LJC 1-66

```

=====
Acq. Operator   : SYSTEM                      Seq. Line :    4
Acq. Instrument : 1220 HPLC                    Location  :    4
Injection Date  : 10/5/2020 4:16:18 PM      Inj       :    1
                                           Inj Volume: 30.000 µl
Different Inj Volume from Sample Entry! Actual Inj Volume : 50.000 µl
Method          : C:\Chem32\1\Data\luana 2020-10-05 14-53-23\MOHAMED-SMALL MOLECULE.M (
                Sequence Method)
Last changed    : 10/5/2020 2:58:07 PM by SYSTEM
Method Info     : Water/MeOH

Sample Info     : LJC 1-66
  
```

Additional Info : Peak(s) manually integrated

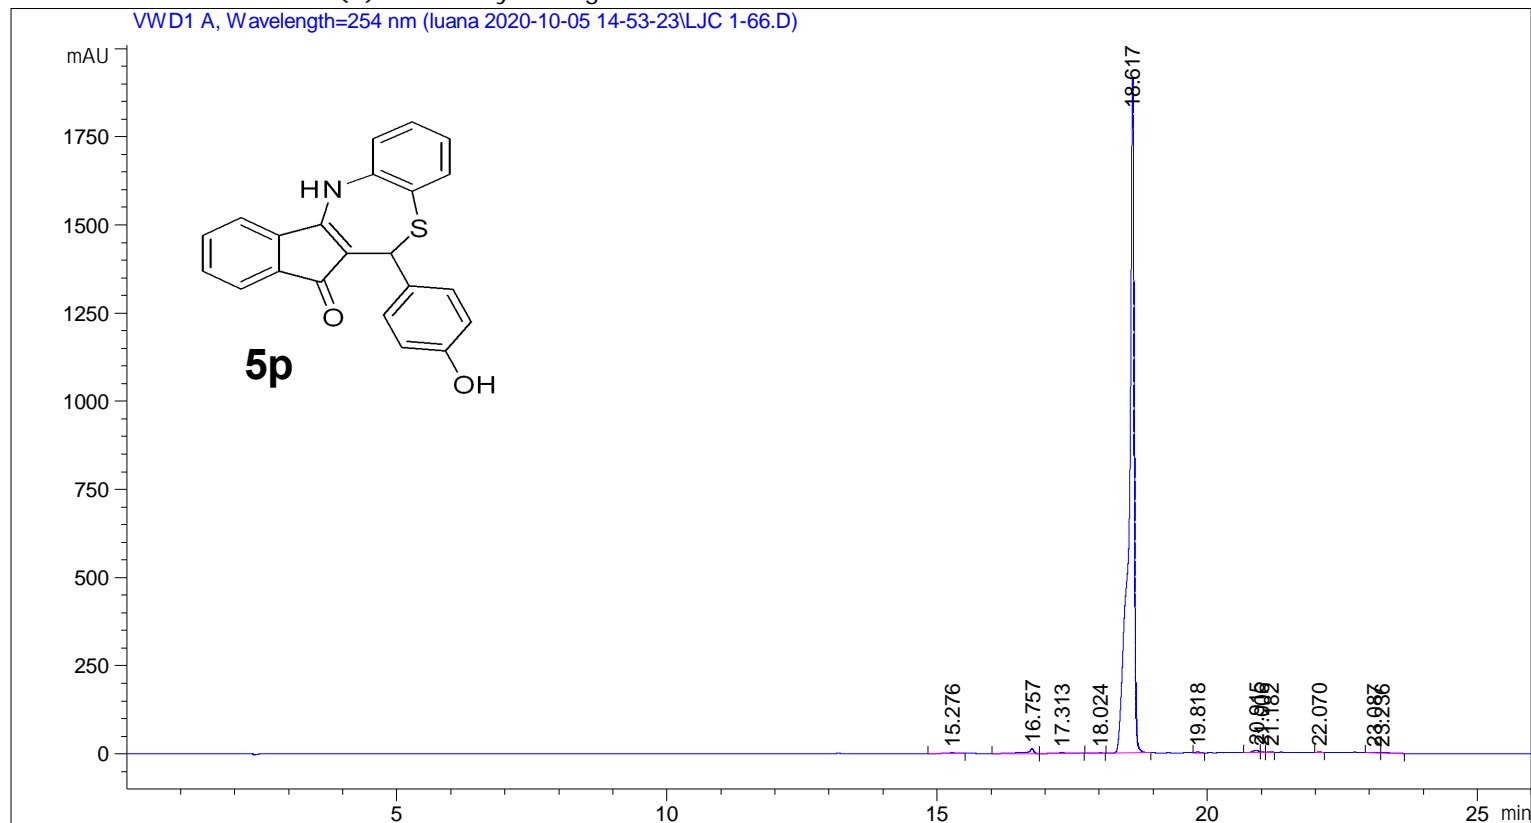

```

=====
                          Area Percent Report
=====
  
```

```

Sorted By      :      Signal
Multiplier     :      1.0000
Dilution       :      1.0000
Use Multiplier & Dilution Factor with ISTDs
  
```

Signal 1: VWD1 A, Wavelength=254 nm

| Peak # | RetTime [min] | Type | Width [min] | Area [mAU*s] | Height [mAU] | Area % |
|--------|---------------|------|-------------|--------------|--------------|--------|
| 1      | 15.276        | BV R | 0.1073      | 23.01365     | 2.90744      | 0.1781 |
| 2      | 16.757        | BB   | 0.1236      | 123.40454    | 13.38598     | 0.9551 |
| 3      | 17.313        | BV R | 0.1104      | 30.63163     | 3.66825      | 0.2371 |
| 4      | 18.024        | BB   | 0.0821      | 10.32845     | 1.80940      | 0.0799 |

Sample Name: LJC 1-66

| Peak # | RetTime [min] | Type | Width [min] | Area [mAU*s] | Height [mAU] | Area %  |
|--------|---------------|------|-------------|--------------|--------------|---------|
| 5      | 18.617        | BB   | 0.0908      | 1.25792e4    | 1912.12598   | 97.3583 |
| 6      | 19.818        | VB   | 0.0716      | 12.29644     | 2.48906      | 0.0952  |
| 7      | 20.915        | BV   | 0.1053      | 52.01048     | 6.60877      | 0.4025  |
| 8      | 21.006        | VV   | 0.0569      | 10.83188     | 2.81351      | 0.0838  |
| 9      | 21.182        | VB   | 0.0808      | 15.29596     | 2.53902      | 0.1184  |
| 10     | 22.070        | VB   | 0.0617      | 10.96301     | 2.76688      | 0.0848  |
| 11     | 23.087        | VV   | 0.1879      | 28.83754     | 1.92394      | 0.2232  |
| 12     | 23.236        | VB   | 0.1502      | 23.70951     | 1.95954      | 0.1835  |

Totals :                                   1.29205e4   1954.99777

=====  
\*\*\* End of Report \*\*\*



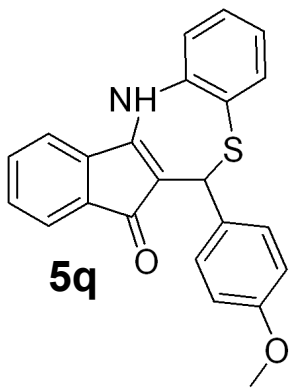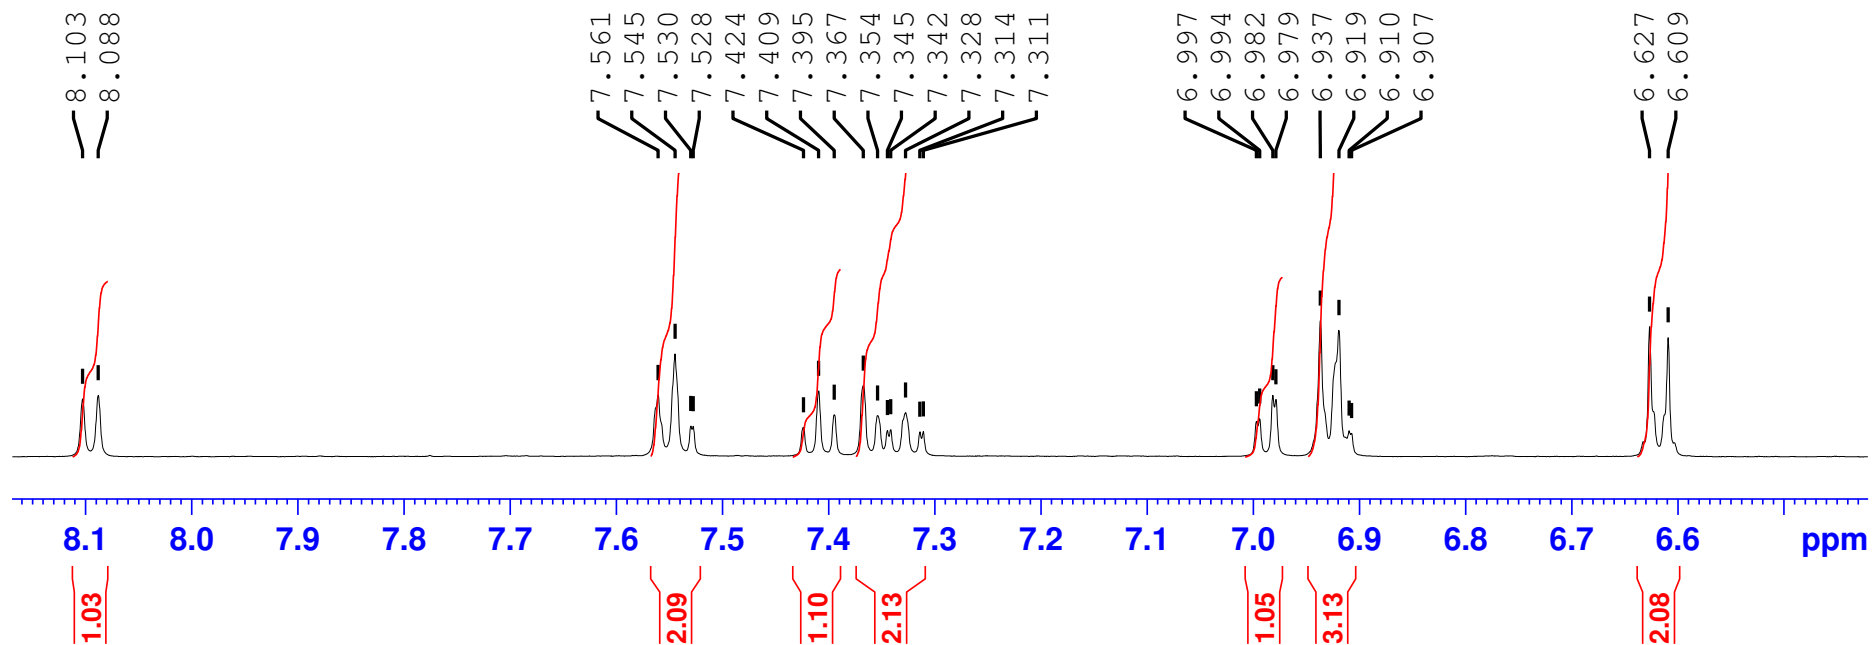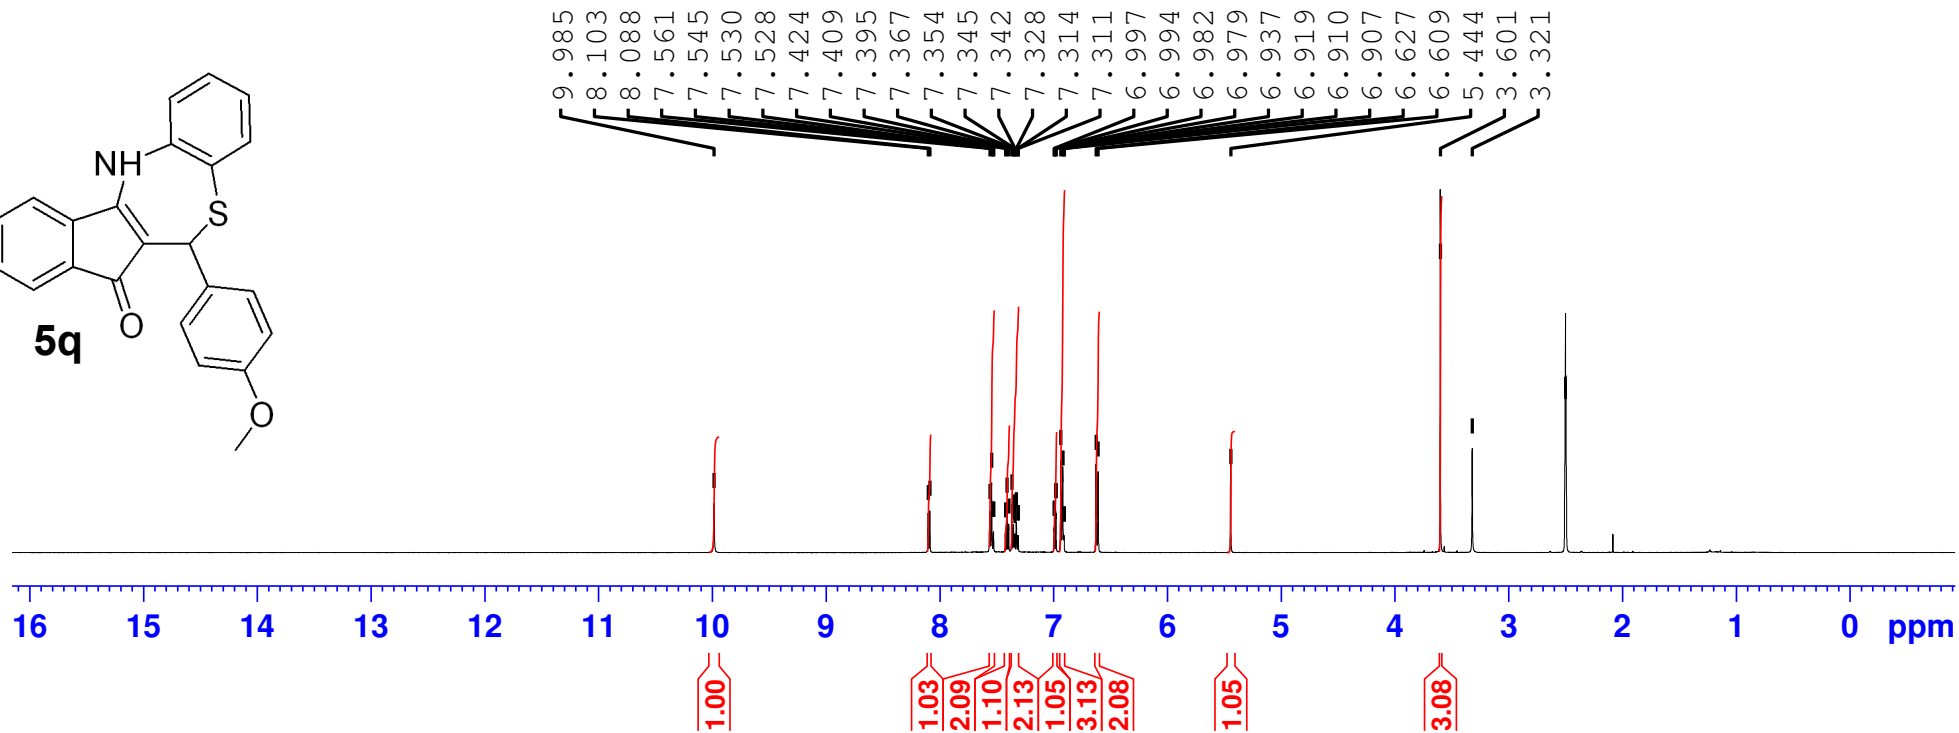

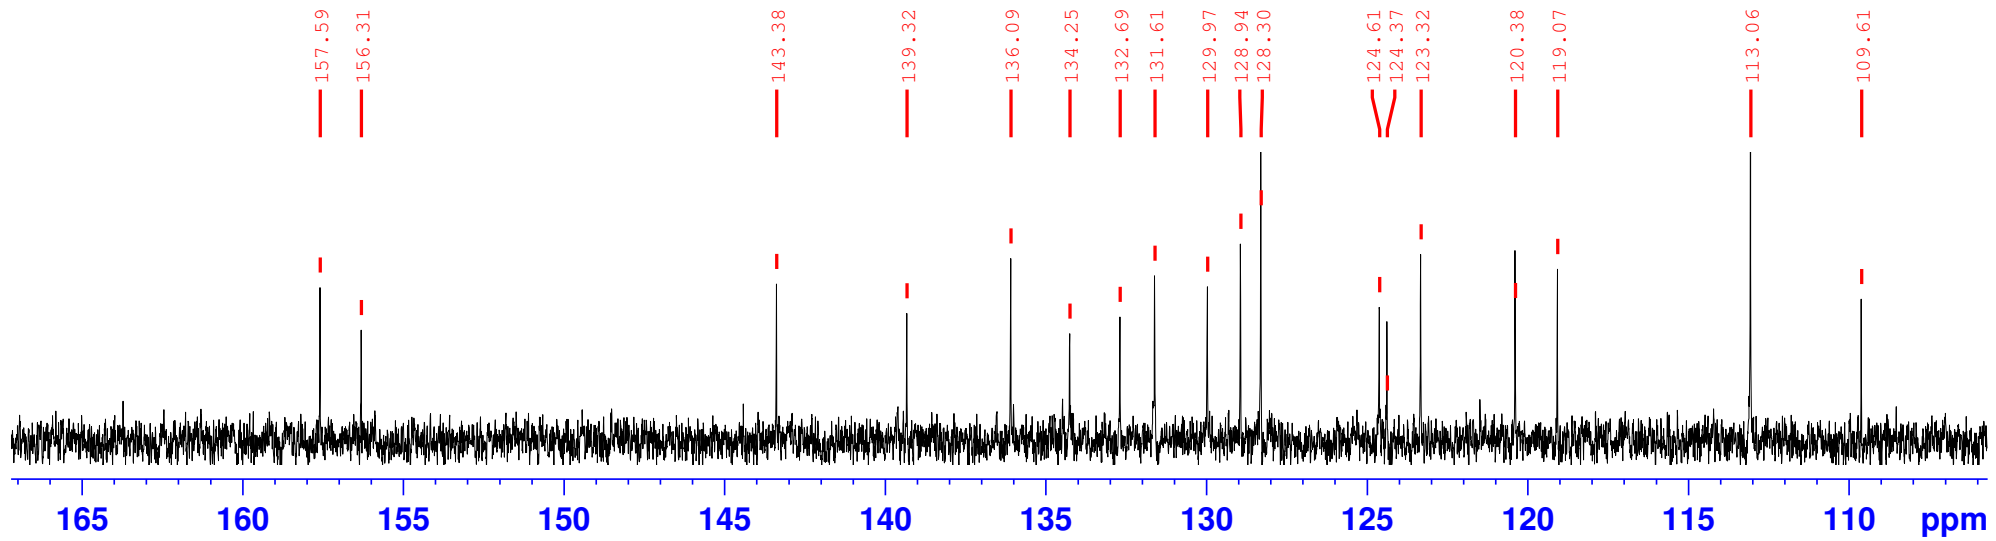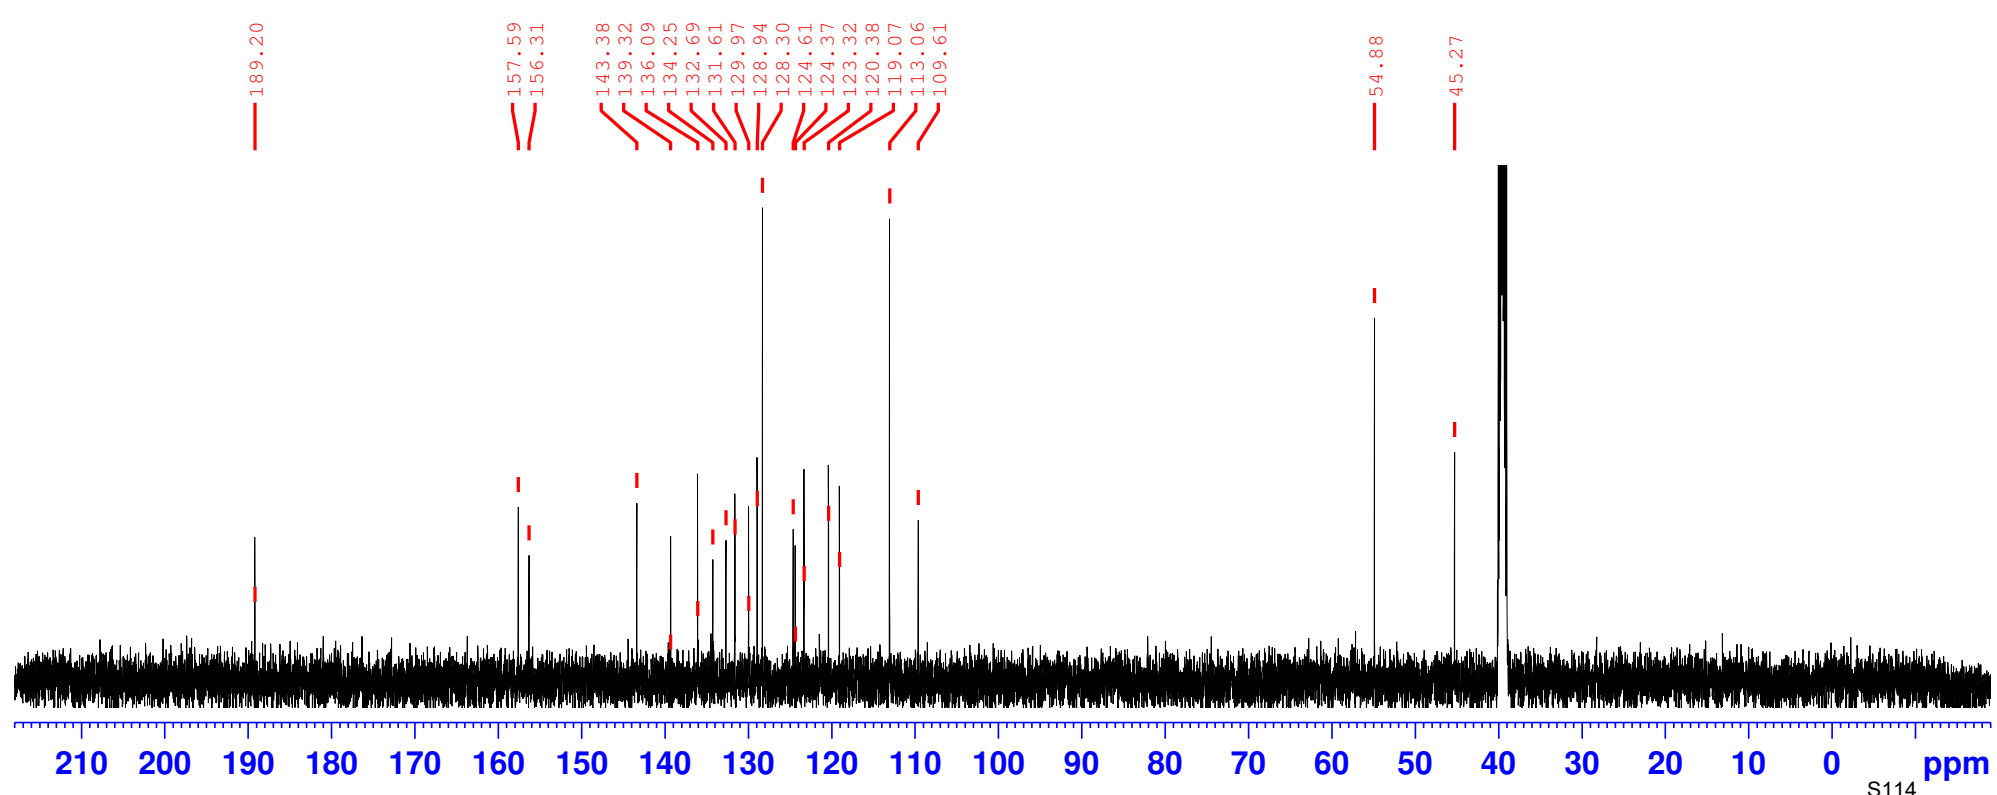

# User Spectrum Plot Report

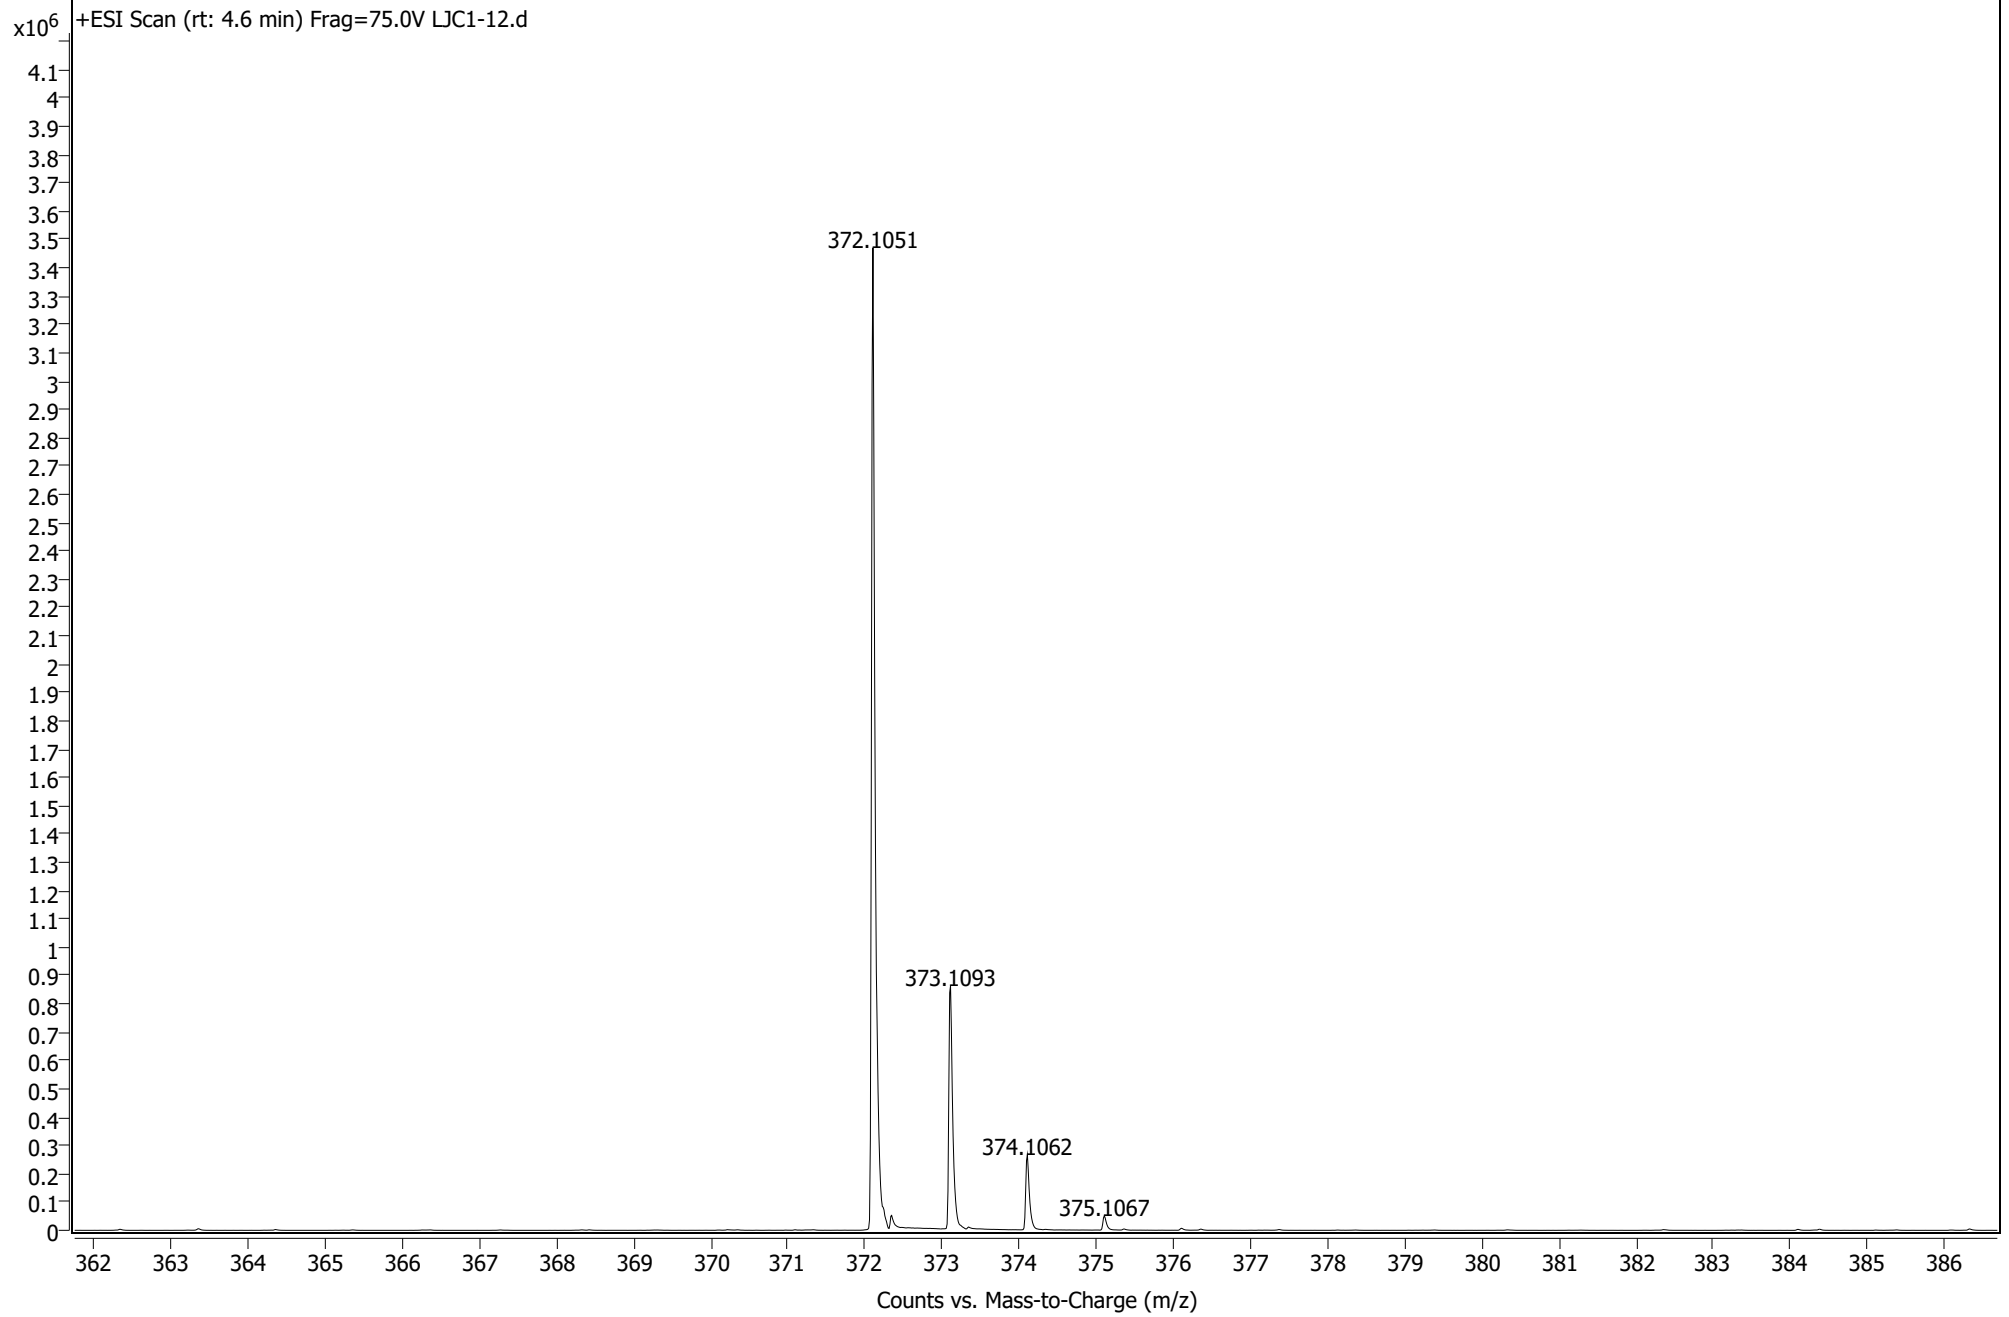

```

=====
Acq. Operator   : SYSTEM                      Seq. Line :    6
Sample Operator : SYSTEM
Acq. Instrument : 1260Infinity2              Location  : P1-C-05
Injection Date  : 3/24/2020 4:14:01 PM       Inj       :    1
                                           Inj Volume: 50.000 µl

Method          : C:\Users\Public\Documents\ChemStation\1\Data\Huihua-MC 2020-03-24 14-05-23
                  \MC-SMALL MOLE.M (Sequence Method)
Last changed    : 2/19/2020 11:54:04 AM by SYSTEM
Additional Info  : Peak(s) manually integrated
  
```

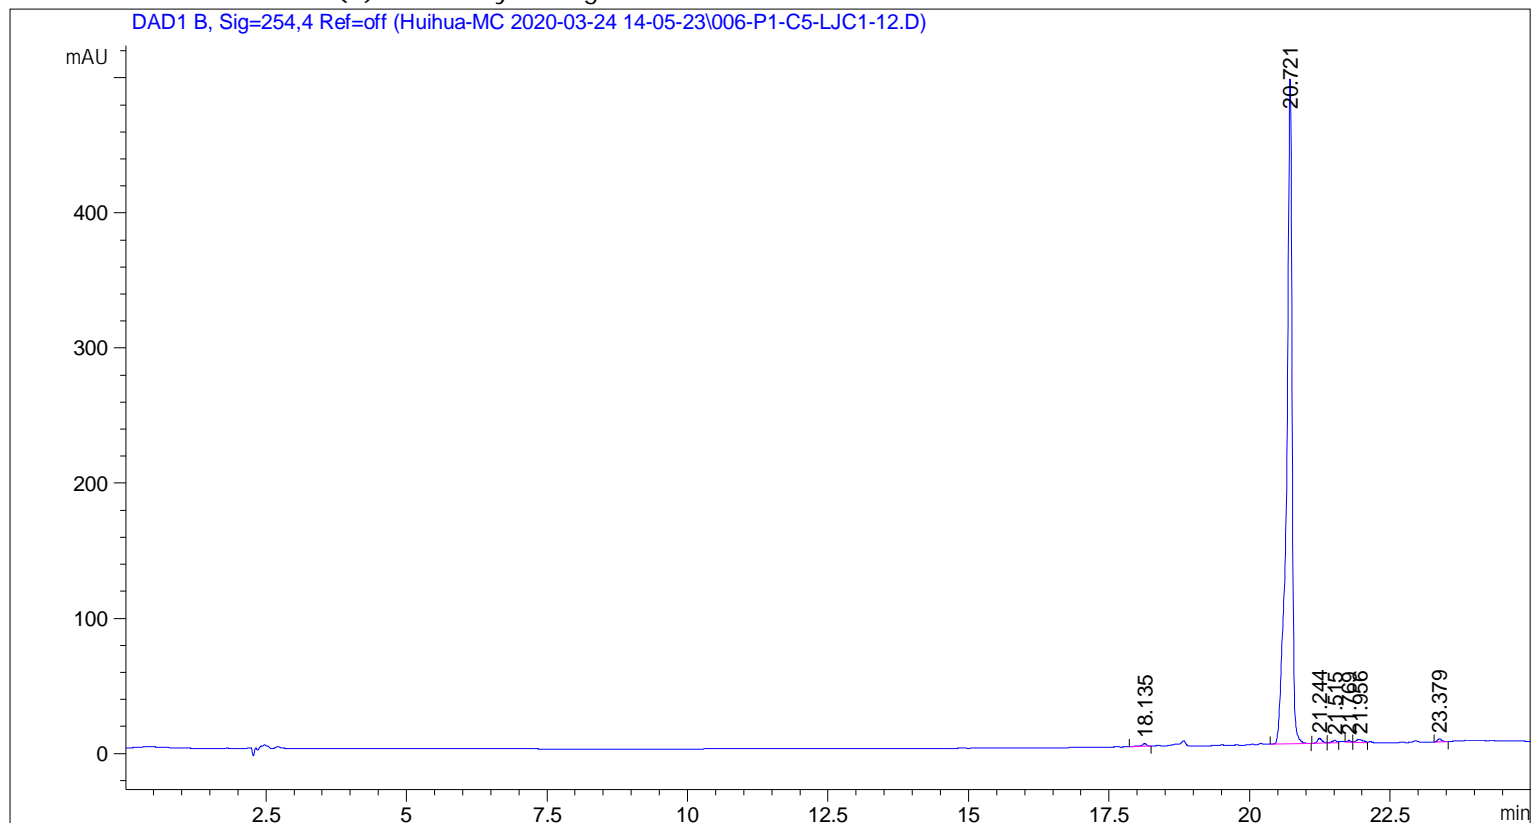

=====  
 Area Percent Report  
 =====

```

Sorted By      :      Signal
Multiplier     :      1.0000
Dilution       :      1.0000
Use Multiplier & Dilution Factor with ISTDs
  
```

Signal 1: DAD1 B, Sig=254,4 Ref=off

| Peak # | RetTime [min] | Type | Width [min] | Area [mAU*s] | Height [mAU] | Area %  |
|--------|---------------|------|-------------|--------------|--------------|---------|
| 1      | 18.135        | BB   | 0.0924      | 12.62685     | 1.97890      | 0.3720  |
| 2      | 20.721        | BB   | 0.0964      | 3318.05762   | 493.63647    | 97.7501 |
| 3      | 21.244        | BB   | 0.0809      | 18.55090     | 3.44157      | 0.5465  |
| 4      | 21.515        | BV   | 0.0808      | 9.00642      | 1.67240      | 0.2653  |
| 5      | 21.769        | VB   | 0.0699      | 6.11392      | 1.32217      | 0.1801  |
| 6      | 21.956        | BV   | 0.1342      | 19.27714     | 2.15768      | 0.5679  |
| 7      | 23.379        | BB   | 0.0743      | 10.79699     | 2.23928      | 0.3181  |

Sample Name: LJC1-56C

```

=====
Acq. Operator   : SYSTEM                      Seq. Line :    7
Acq. Instrument : 1220 HPLC                   Location  :   46
Injection Date  : 8/14/2020 5:35:56 PM      Inj       :    1
                                           Inj Volume: 50.000 µl
Method          : C:\Chem32\1\Data\luana 2020-08-14 14-48-41\MOHAMED-SMALL MOLECULE.M (
                : Sequence Method)
Last changed    : 8/14/2020 2:48:44 PM by SYSTEM
Sample Info     : LJC1-56C
=====

```

Additional Info : Peak(s) manually integrated

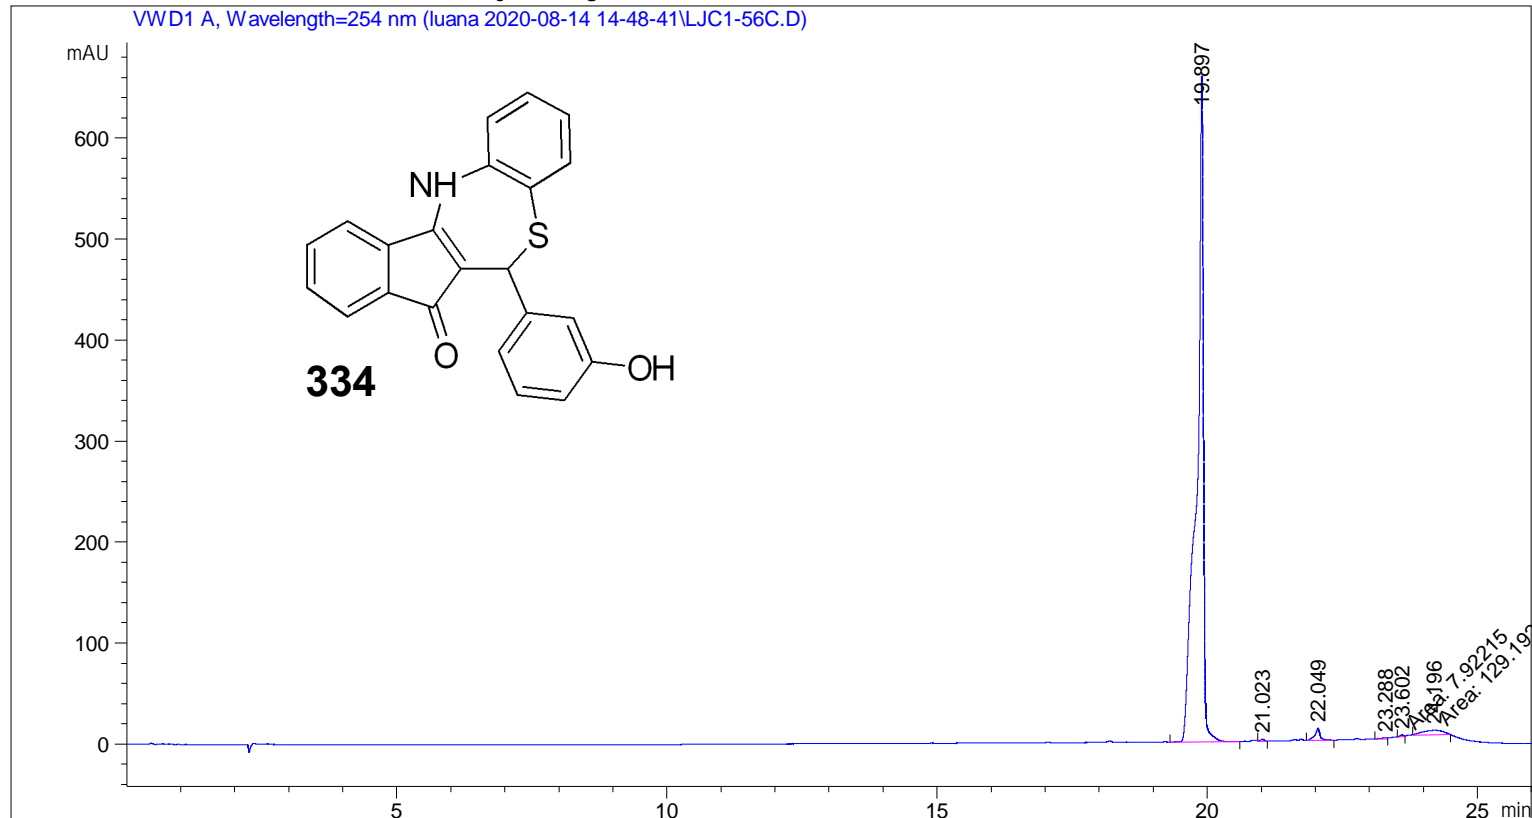

```

=====
                          Area Percent Report
=====

```

```

Sorted By      :      Signal
Multiplier     :      1.0000
Dilution      :      1.0000
Use Multiplier & Dilution Factor with ISTDs

```

Signal 1: VWD1 A, Wavelength=254 nm

| Peak # | RetTime [min] | Type | Width [min] | Area [mAU*s] | Height [mAU] | Area %  |
|--------|---------------|------|-------------|--------------|--------------|---------|
| 1      | 19.897        | BV R | 0.1140      | 5621.10010   | 659.25385    | 95.8936 |
| 2      | 21.023        | VB   | 0.0778      | 10.87987     | 1.97471      | 0.1856  |
| 3      | 22.049        | BB   | 0.0921      | 80.39686     | 11.93002     | 1.3715  |
| 4      | 23.288        | BV   | 0.0913      | 12.31616     | 1.72462      | 0.2101  |
| 5      | 23.602        | MM   | 0.0557      | 7.92215      | 1.70286      | 0.1351  |
| 6      | 24.196        | MM   | 0.4624      | 129.19249    | 4.65623      | 2.2040  |

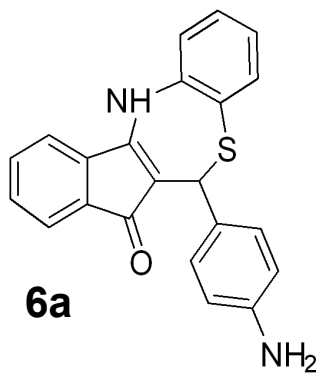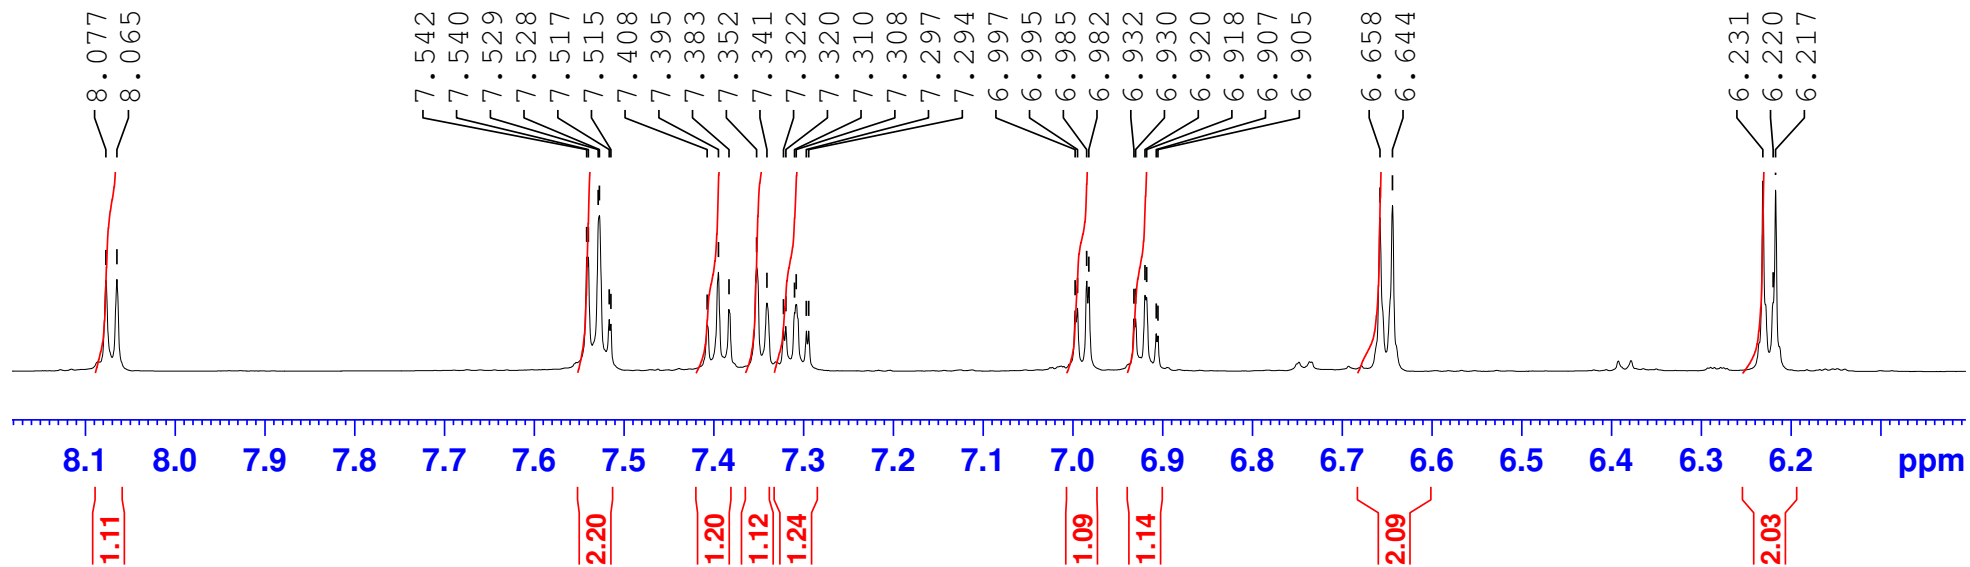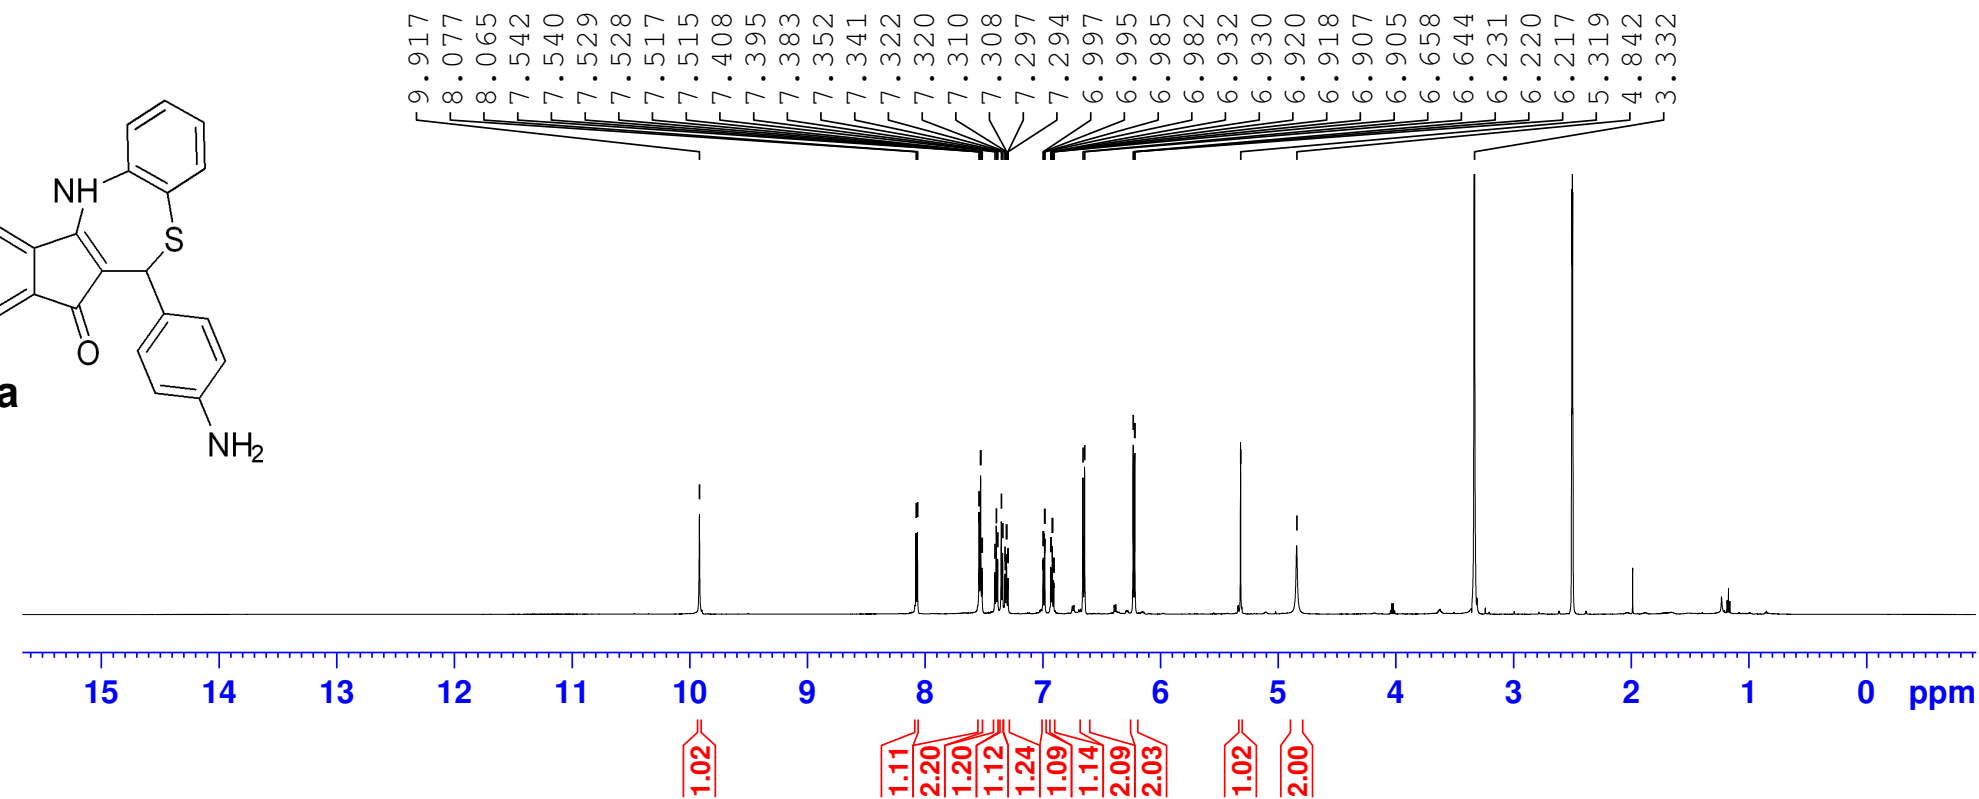

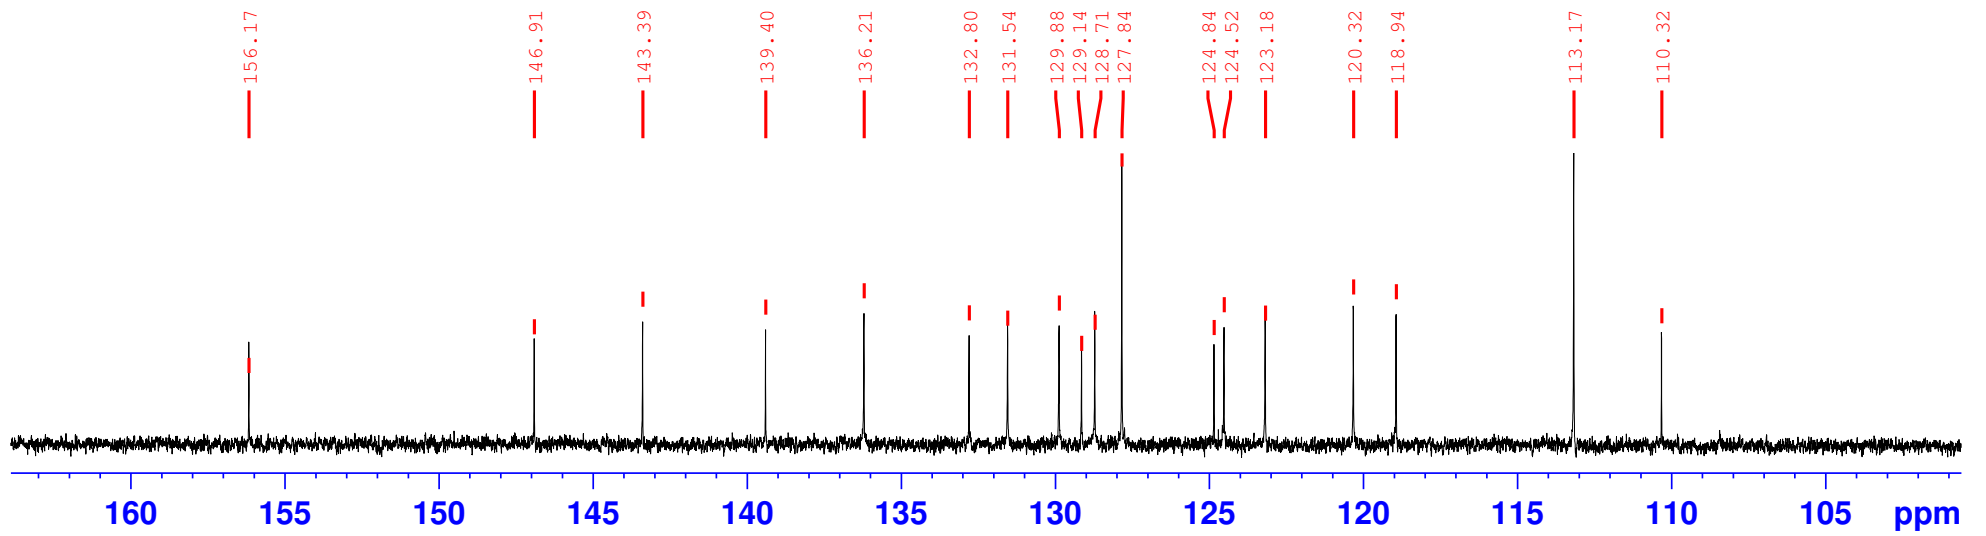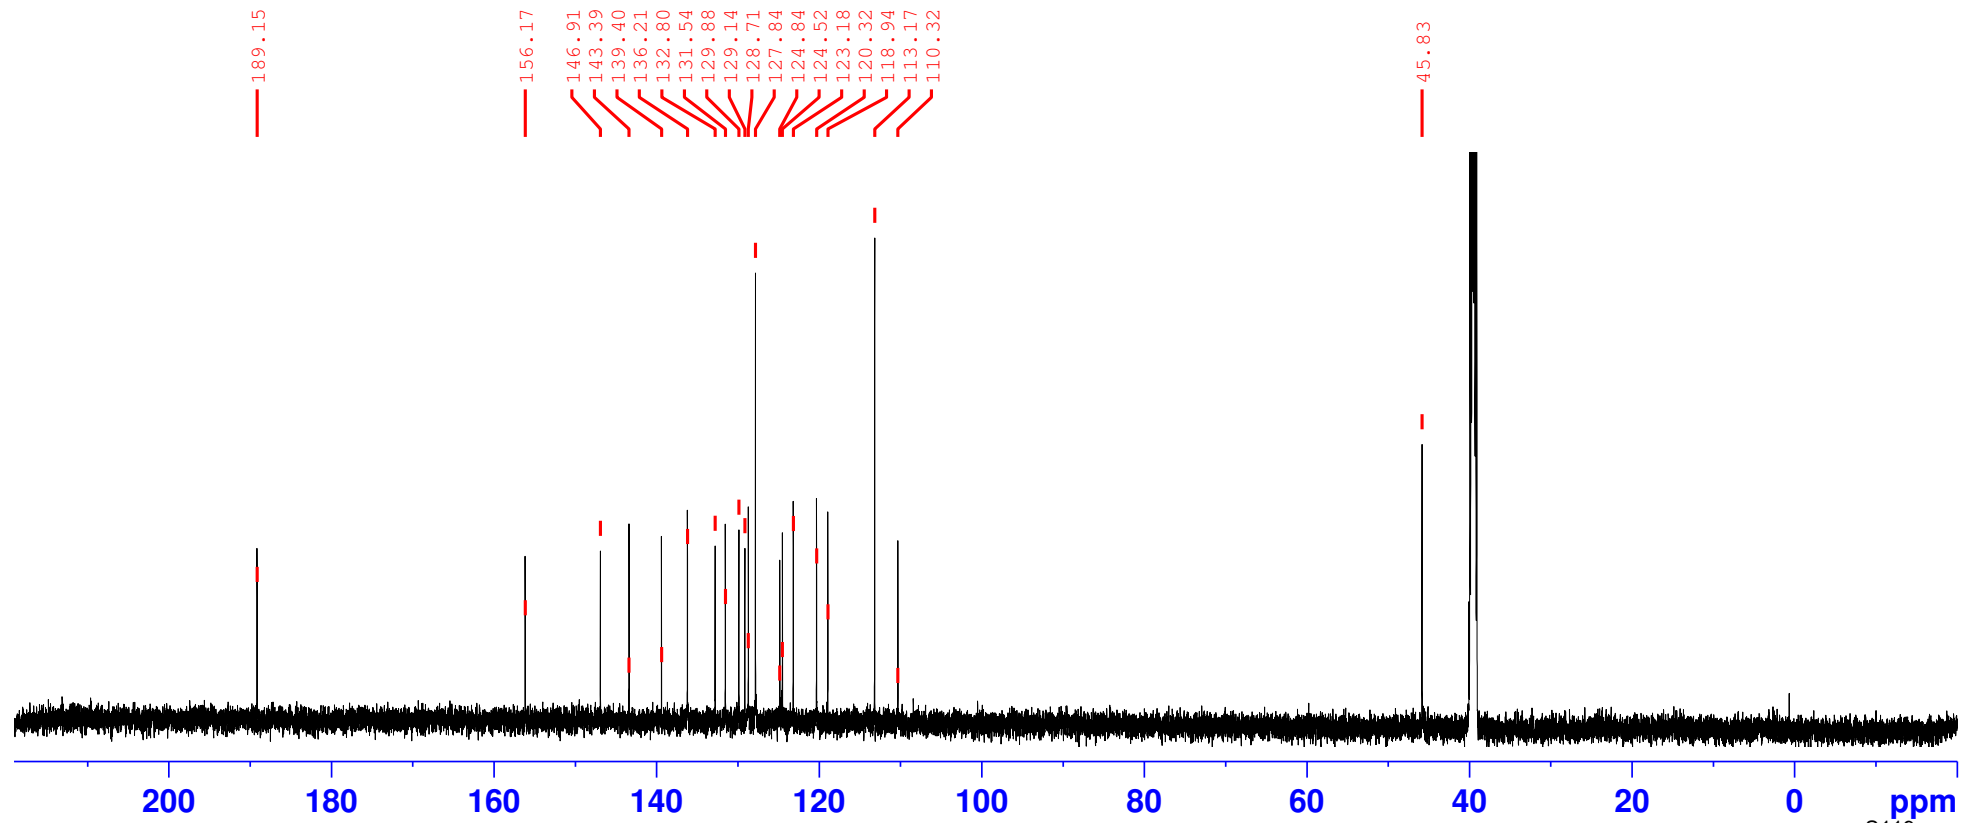

# User Spectrum Plot Report

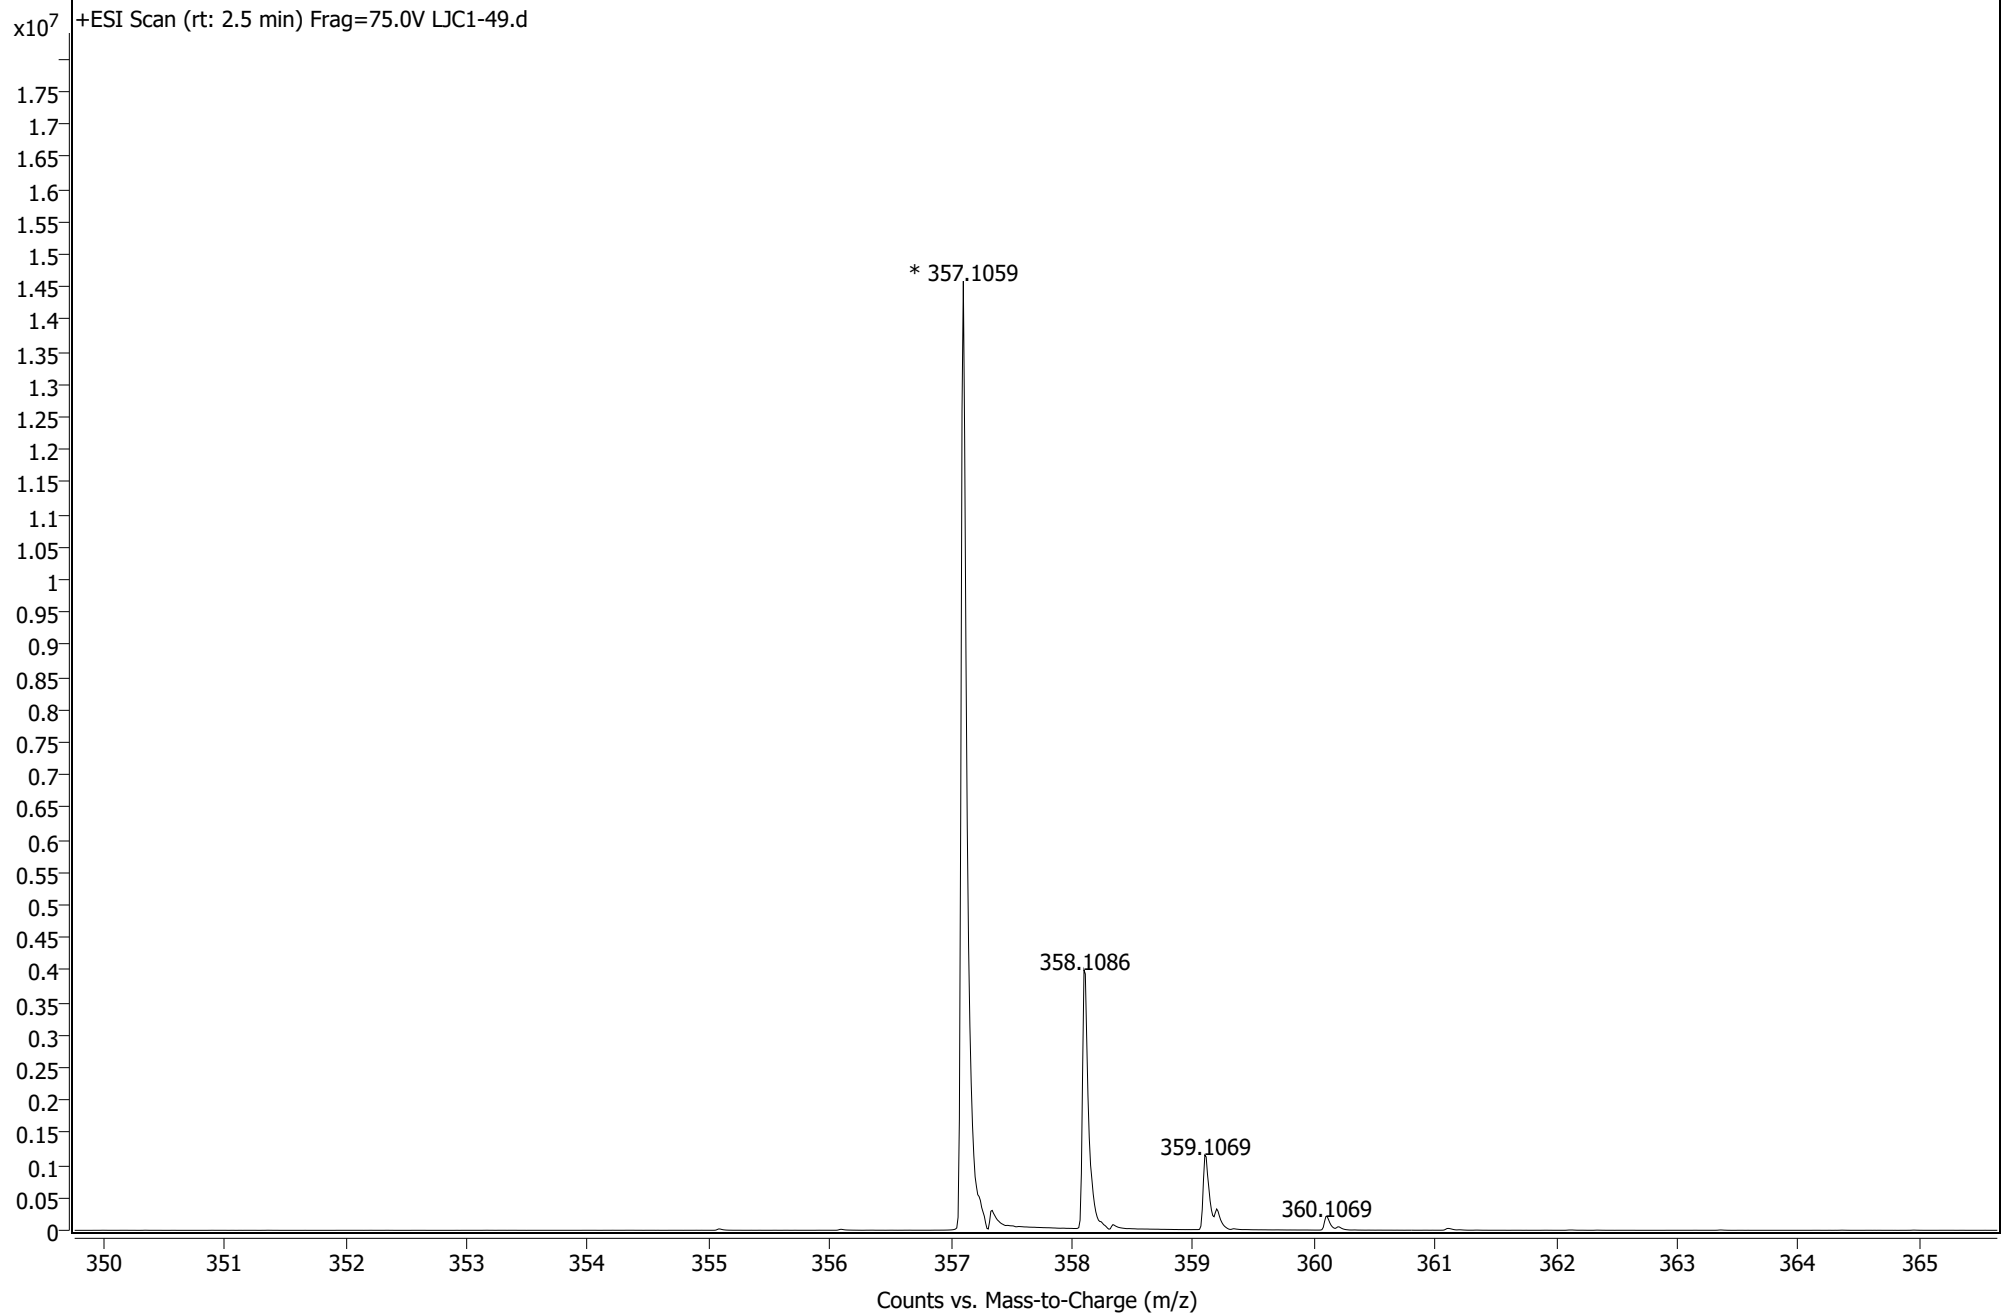



```

=====
Acq. Operator   : SYSTEM                      Seq. Line :    4
Acq. Instrument : 1220 HPLC                   Location  :   12
Injection Date  : 10/10/2020 11:07:59 AM    Inj       :    1
                                           Inj Volume: 30.000 µl
Different Inj Volume from Sample Entry! Actual Inj Volume : 50.000 µl
Method          : C:\Chem32\1\Data\luana 2020-10-10 09-45-18\MOHAMED-SMALL MOLECULE.M (
                Sequence Method)
Last changed    : 10/10/2020 10:17:41 AM by SYSTEM
Method Info     : Water/MeOH

Sample Info     : LJC 1-49 (REP)
  
```

Additional Info : Peak(s) manually integrated

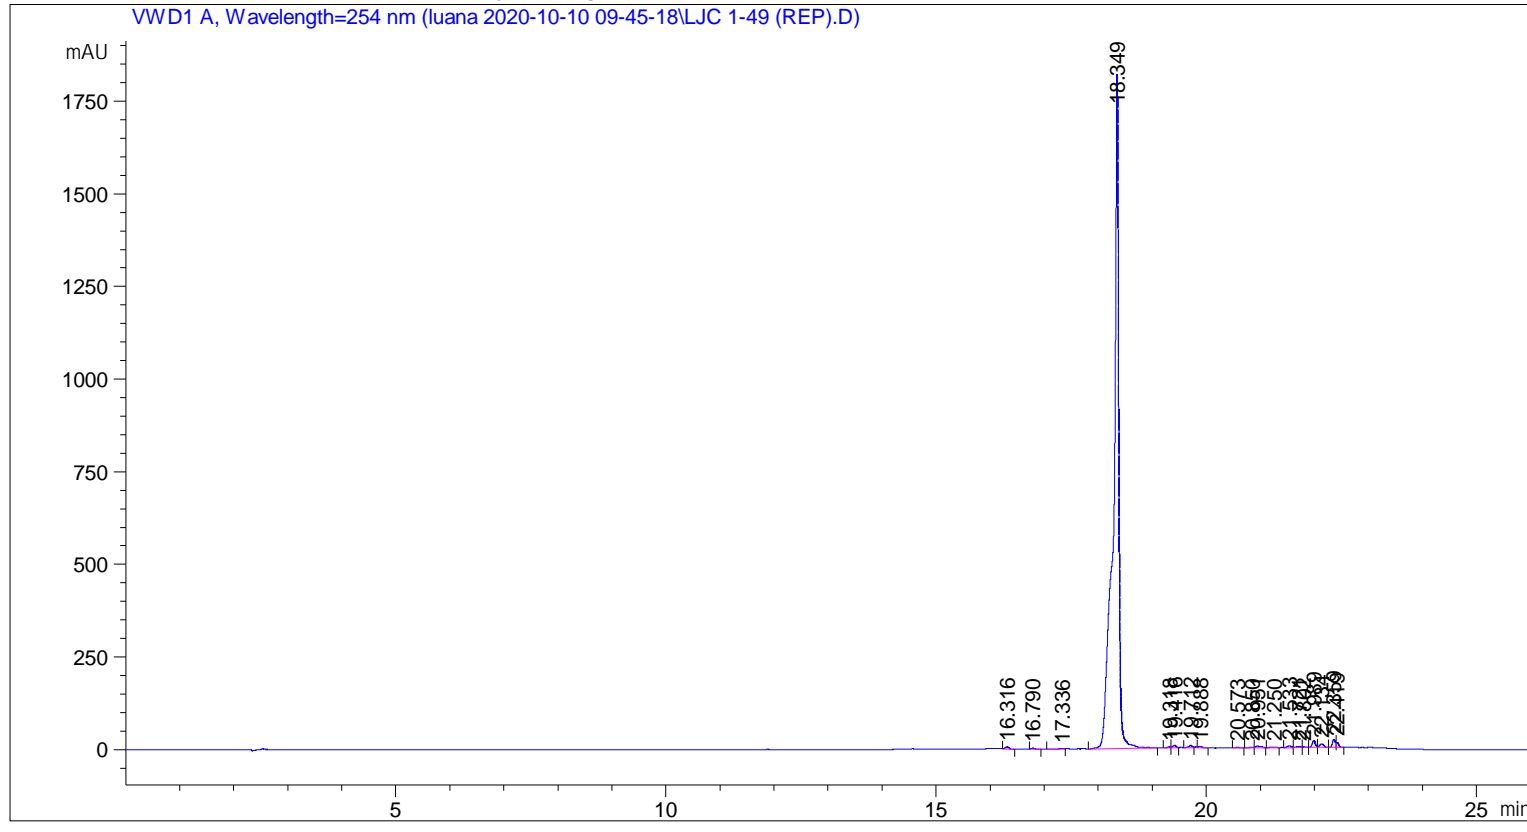

Area Percent Report

```

Sorted By      : Signal
Multiplier     : 1.0000
Dilution      : 1.0000
Use Multiplier & Dilution Factor with ISTDs
  
```

Signal 1: VWD1 A, Wavelength=254 nm

| Peak # | RetTime [min] | Type | Width [min] | Area [mAU*s] | Height [mAU] | Area %  |
|--------|---------------|------|-------------|--------------|--------------|---------|
| 1      | 16.316        | VB   | 0.0731      | 33.68761     | 6.71122      | 0.2624  |
| 2      | 16.790        | VB   | 0.0623      | 12.18611     | 2.82564      | 0.0949  |
| 3      | 17.336        | BV   | 0.0886      | 14.37601     | 2.04325      | 0.1120  |
| 4      | 18.349        | BV R | 0.0925      | 1.23141e4    | 1818.99268   | 95.9297 |

| Peak # | RetTime [min] | Type | Width [min] | Area [mAU*s] | Height [mAU] | Area % |
|--------|---------------|------|-------------|--------------|--------------|--------|
| 5      | 19.318        | BV   | 0.0608      | 11.02094     | 2.58219      | 0.0859 |
| 6      | 19.416        | VB   | 0.0648      | 29.12417     | 6.75608      | 0.2269 |
| 7      | 19.712        | BV   | 0.0683      | 30.73411     | 6.60910      | 0.2394 |
| 8      | 19.888        | VB   | 0.0768      | 19.16901     | 3.67528      | 0.1493 |
| 9      | 20.573        | BB   | 0.0868      | 11.55071     | 1.97284      | 0.0900 |
| 10     | 20.850        | BV   | 0.0754      | 12.73168     | 2.32569      | 0.0992 |
| 11     | 20.951        | VB   | 0.1000      | 34.59518     | 4.61496      | 0.2695 |
| 12     | 21.250        | BB   | 0.0961      | 13.58049     | 1.88486      | 0.1058 |
| 13     | 21.533        | BV   | 0.0750      | 22.20419     | 4.54770      | 0.1730 |
| 14     | 21.721        | VV   | 0.0848      | 17.24193     | 2.80103      | 0.1343 |
| 15     | 21.802        | VB   | 0.0613      | 7.38845      | 1.73026      | 0.0576 |
| 16     | 21.989        | BV   | 0.0623      | 75.02545     | 18.49339     | 0.5845 |
| 17     | 22.134        | VB   | 0.0832      | 51.91785     | 9.90196      | 0.4045 |
| 18     | 22.359        | BV   | 0.0558      | 82.77595     | 22.03440     | 0.6448 |
| 19     | 22.419        | VB   | 0.0483      | 43.17870     | 13.51973     | 0.3364 |

Totals : 1.28366e4 1934.02222

=====  
\*\*\* End of Report \*\*\*

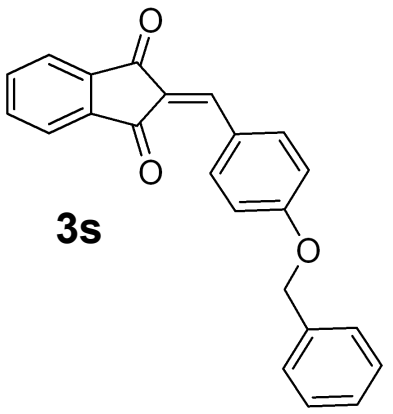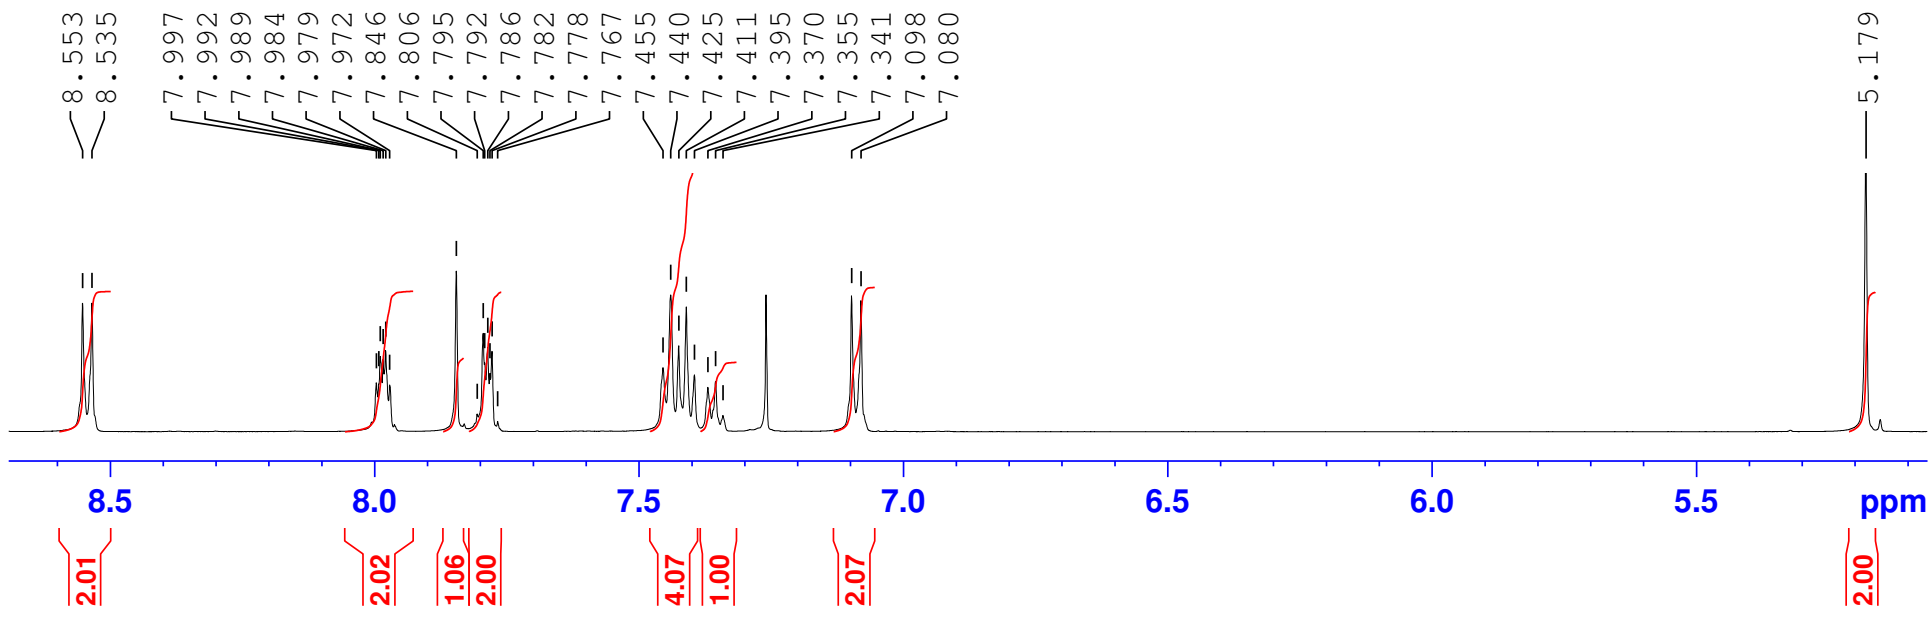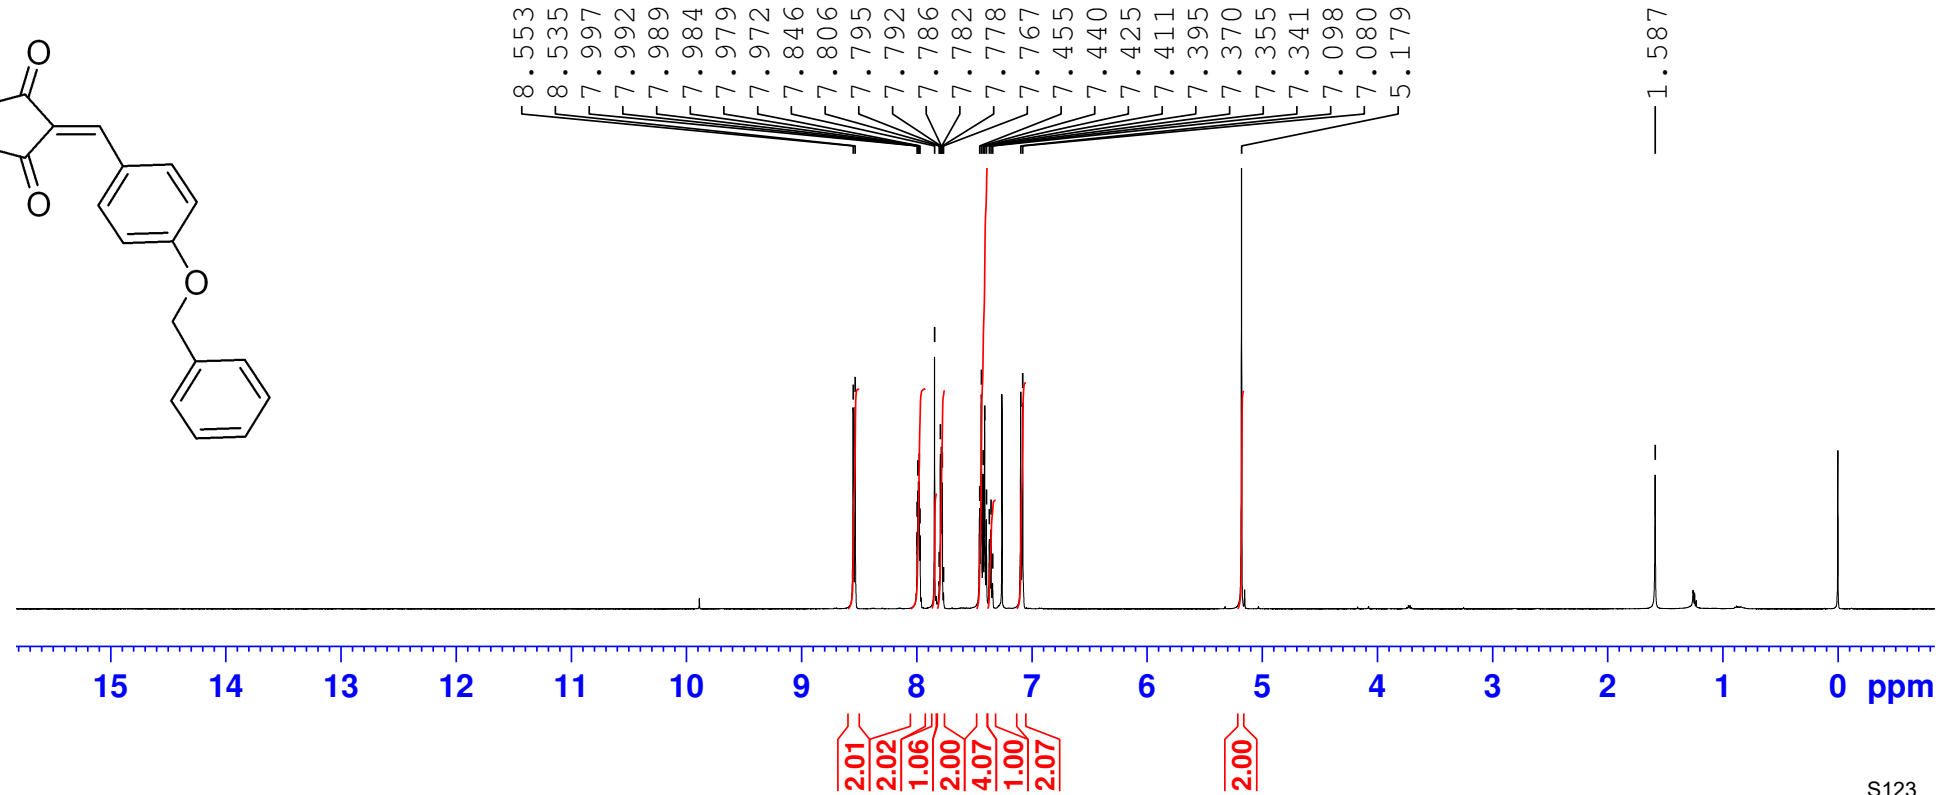

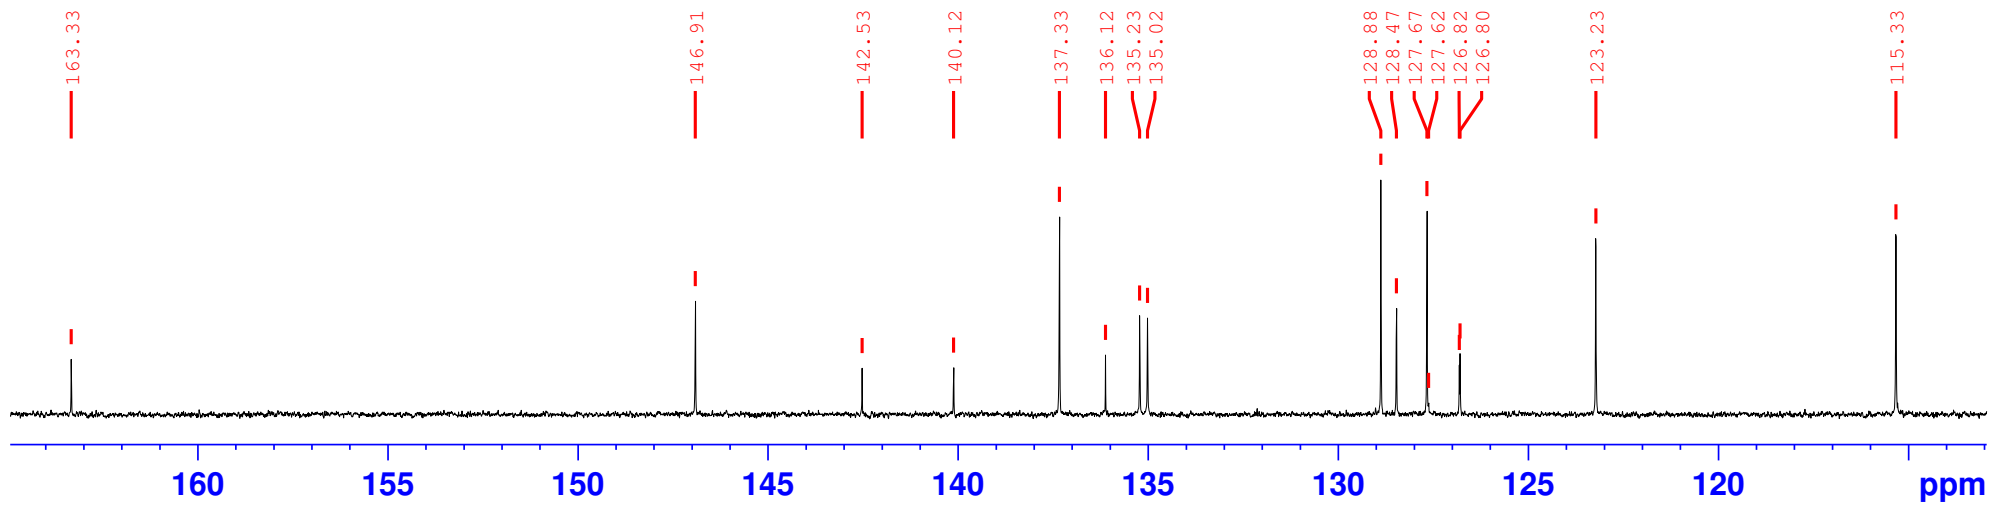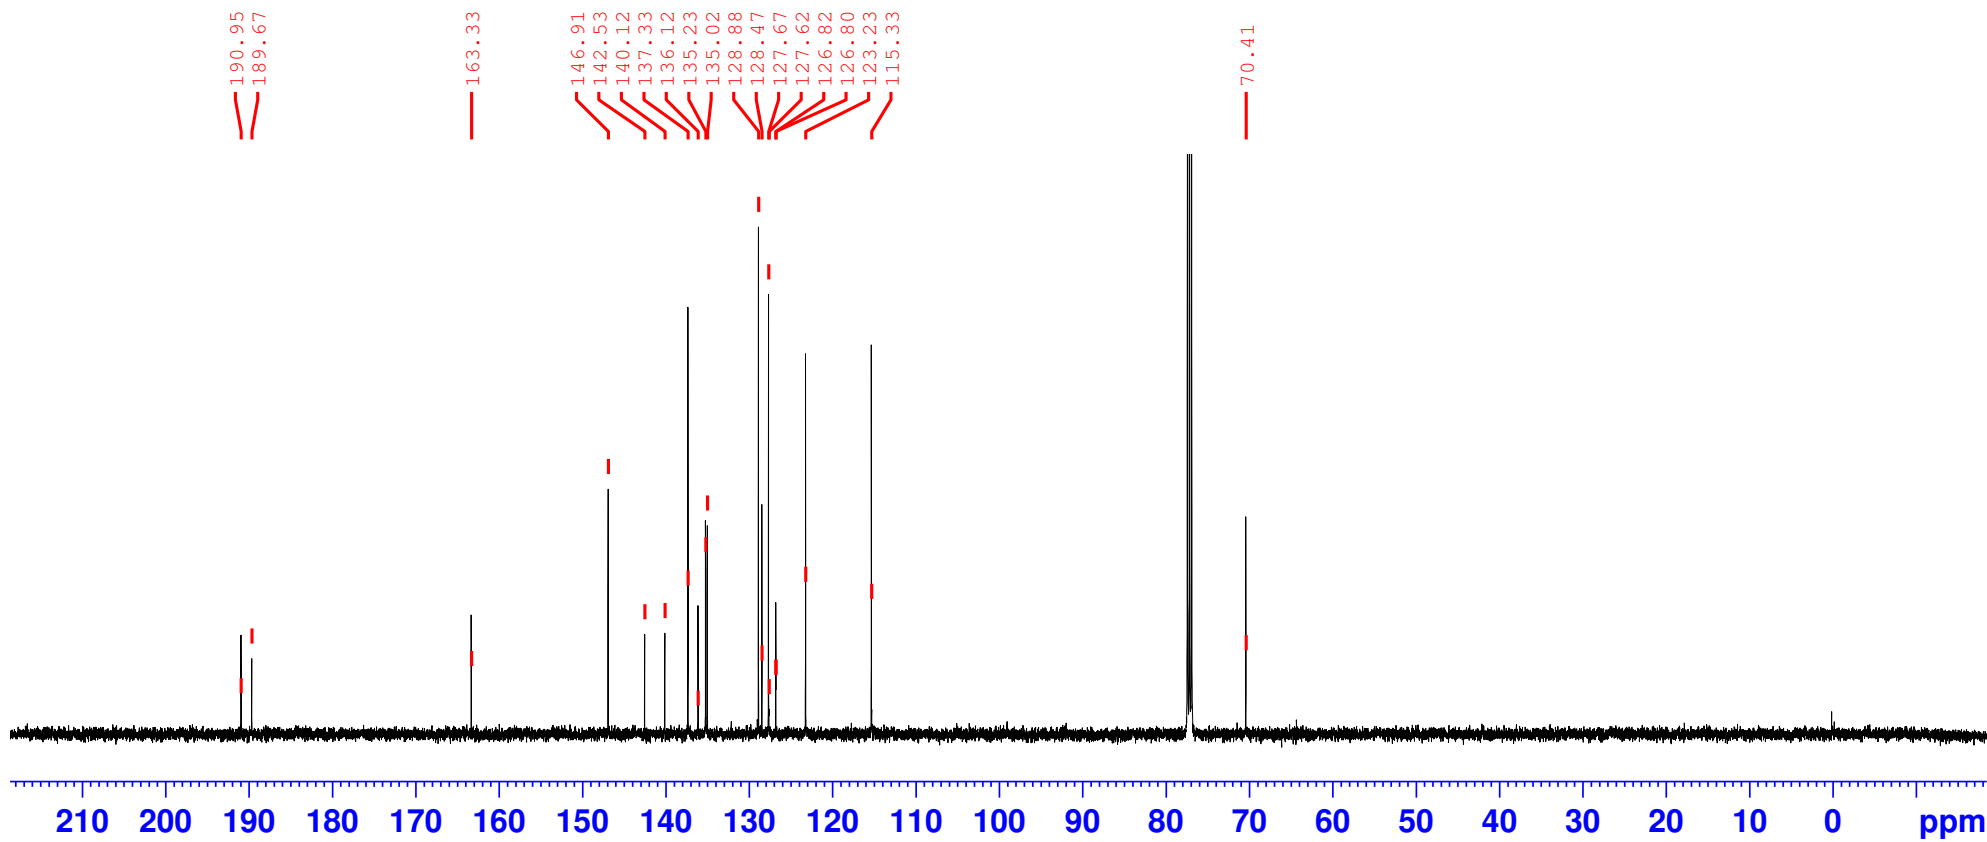

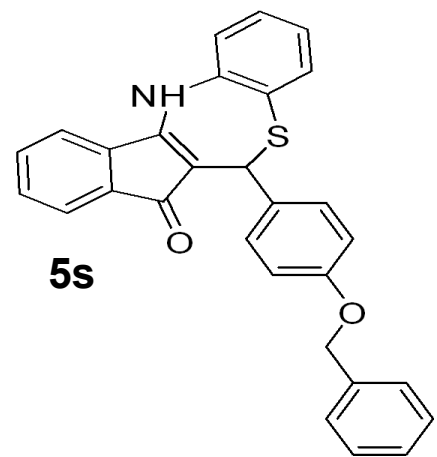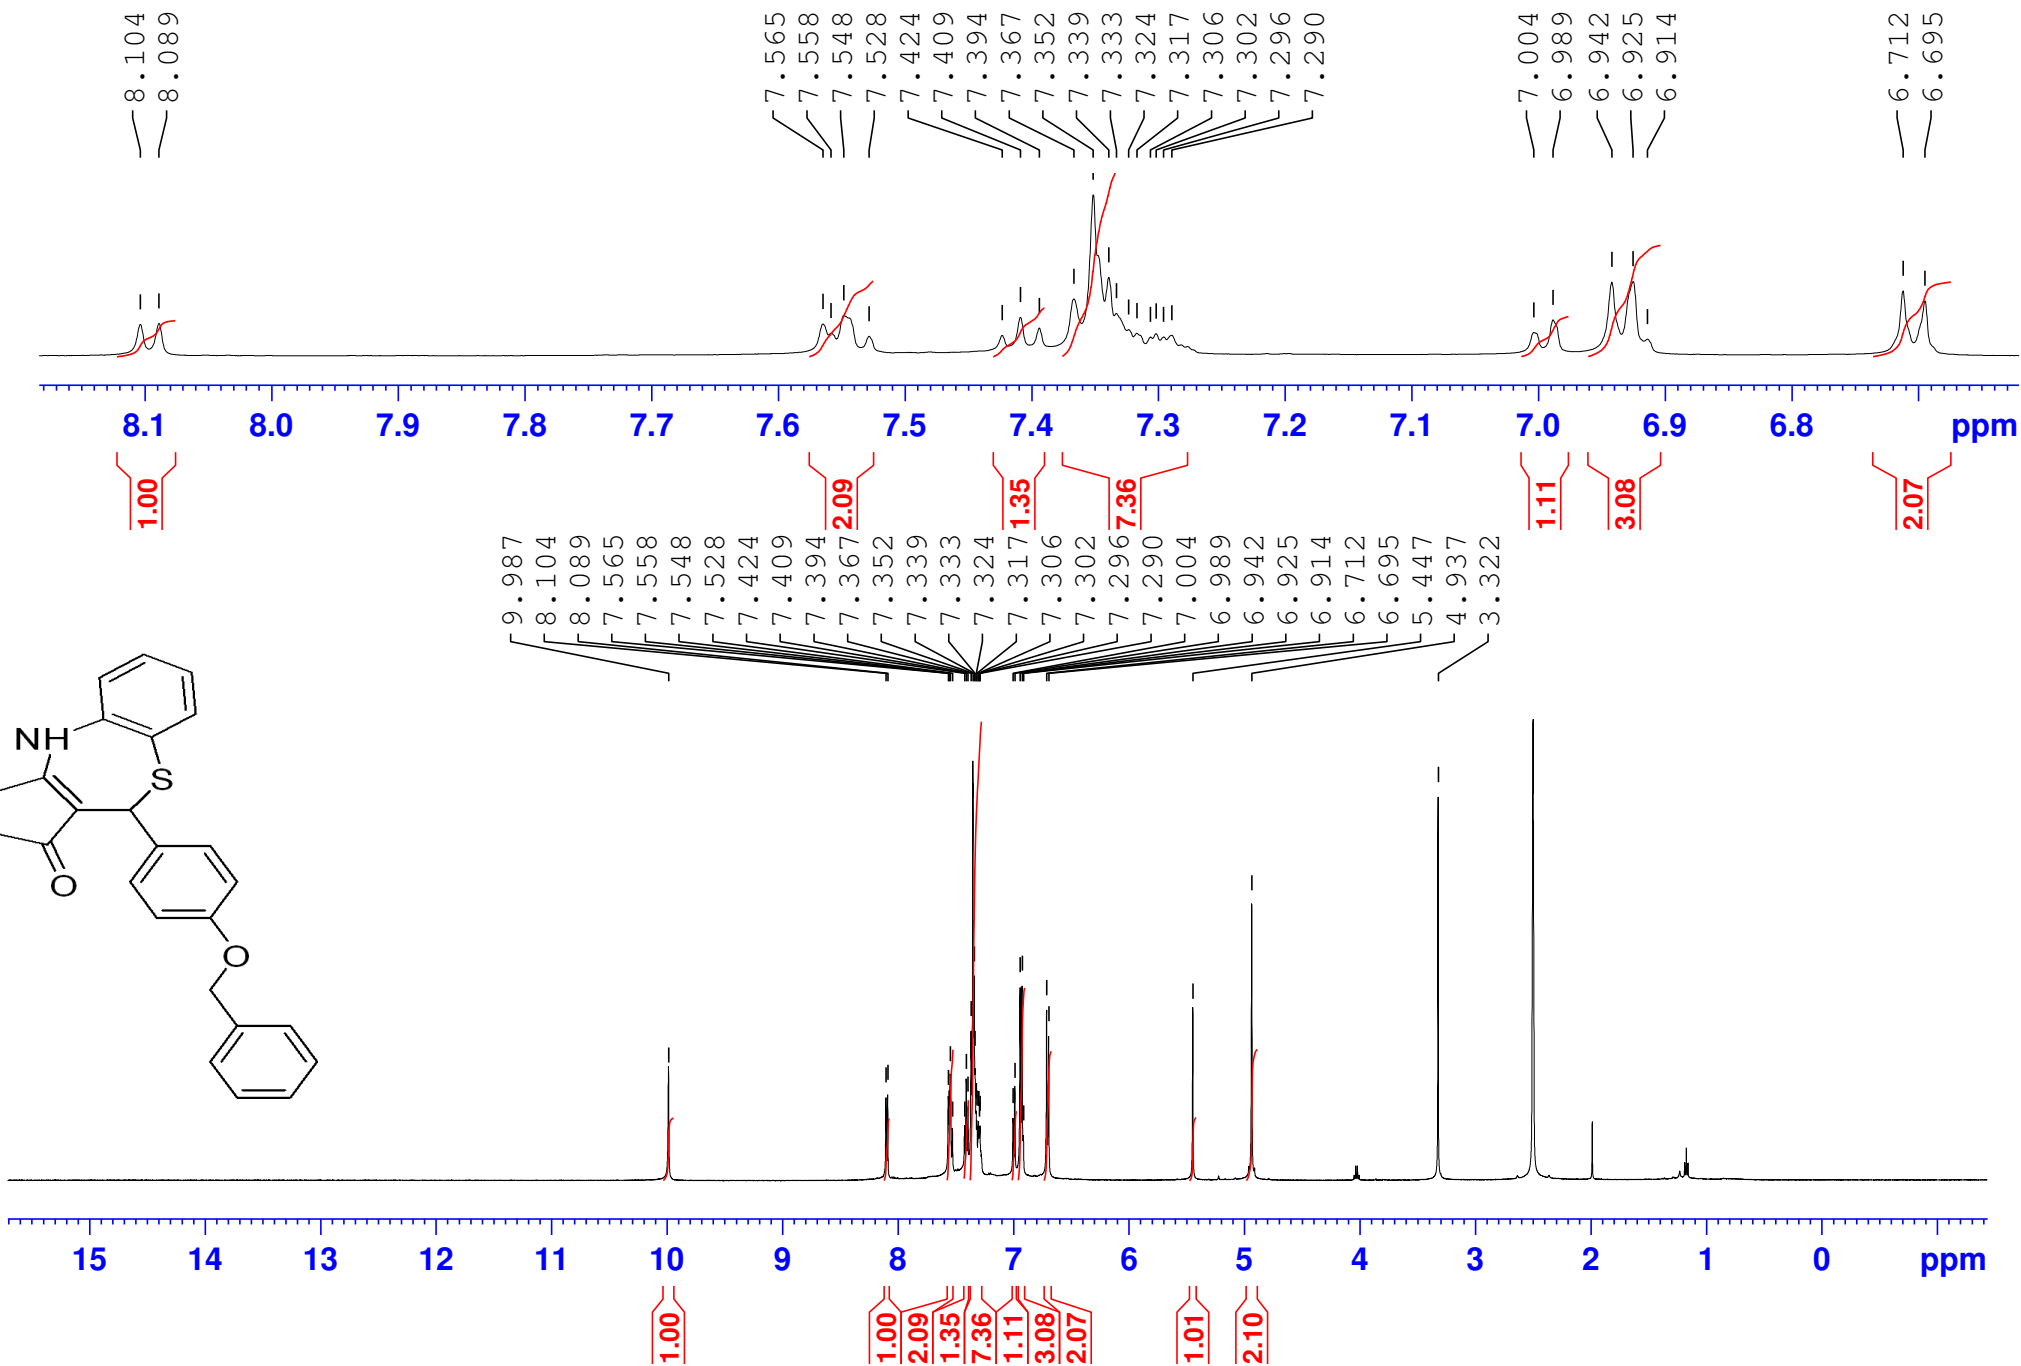

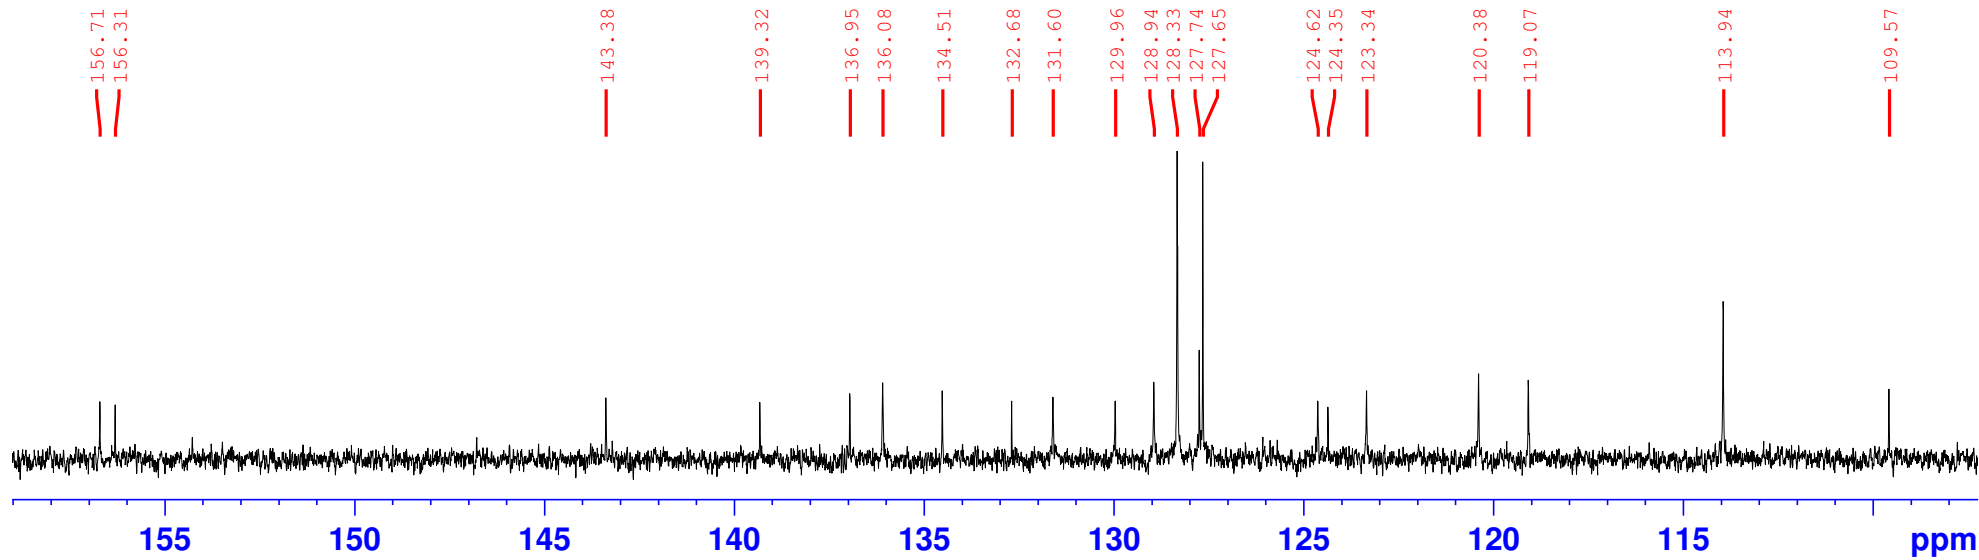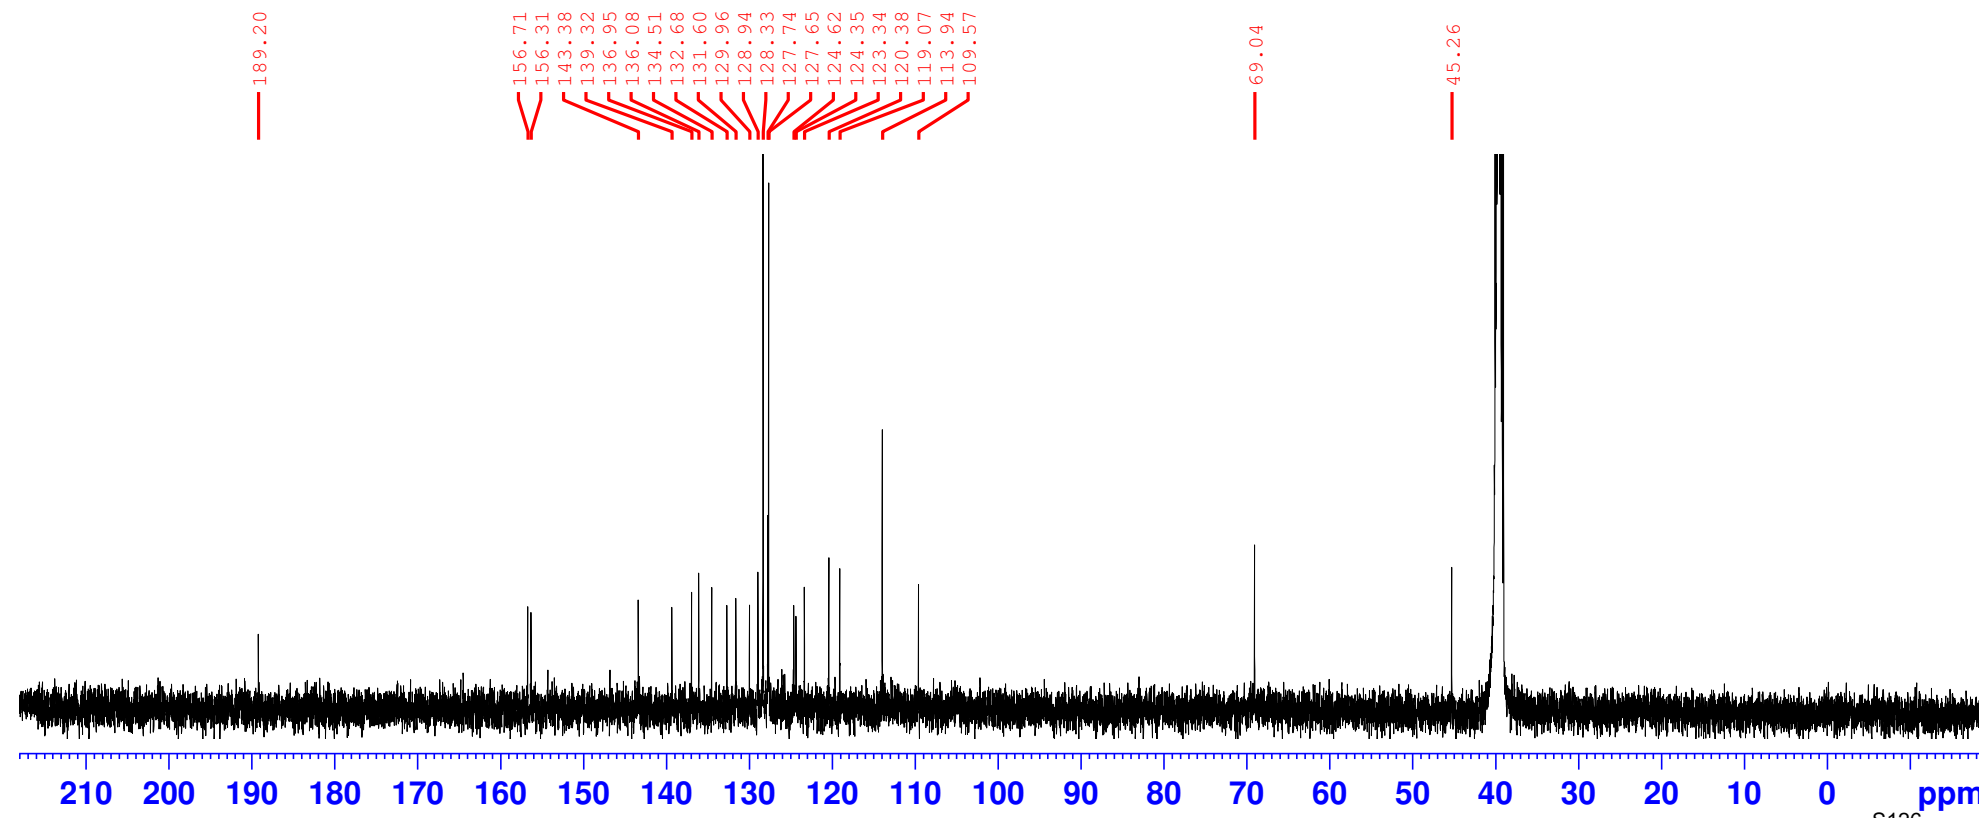

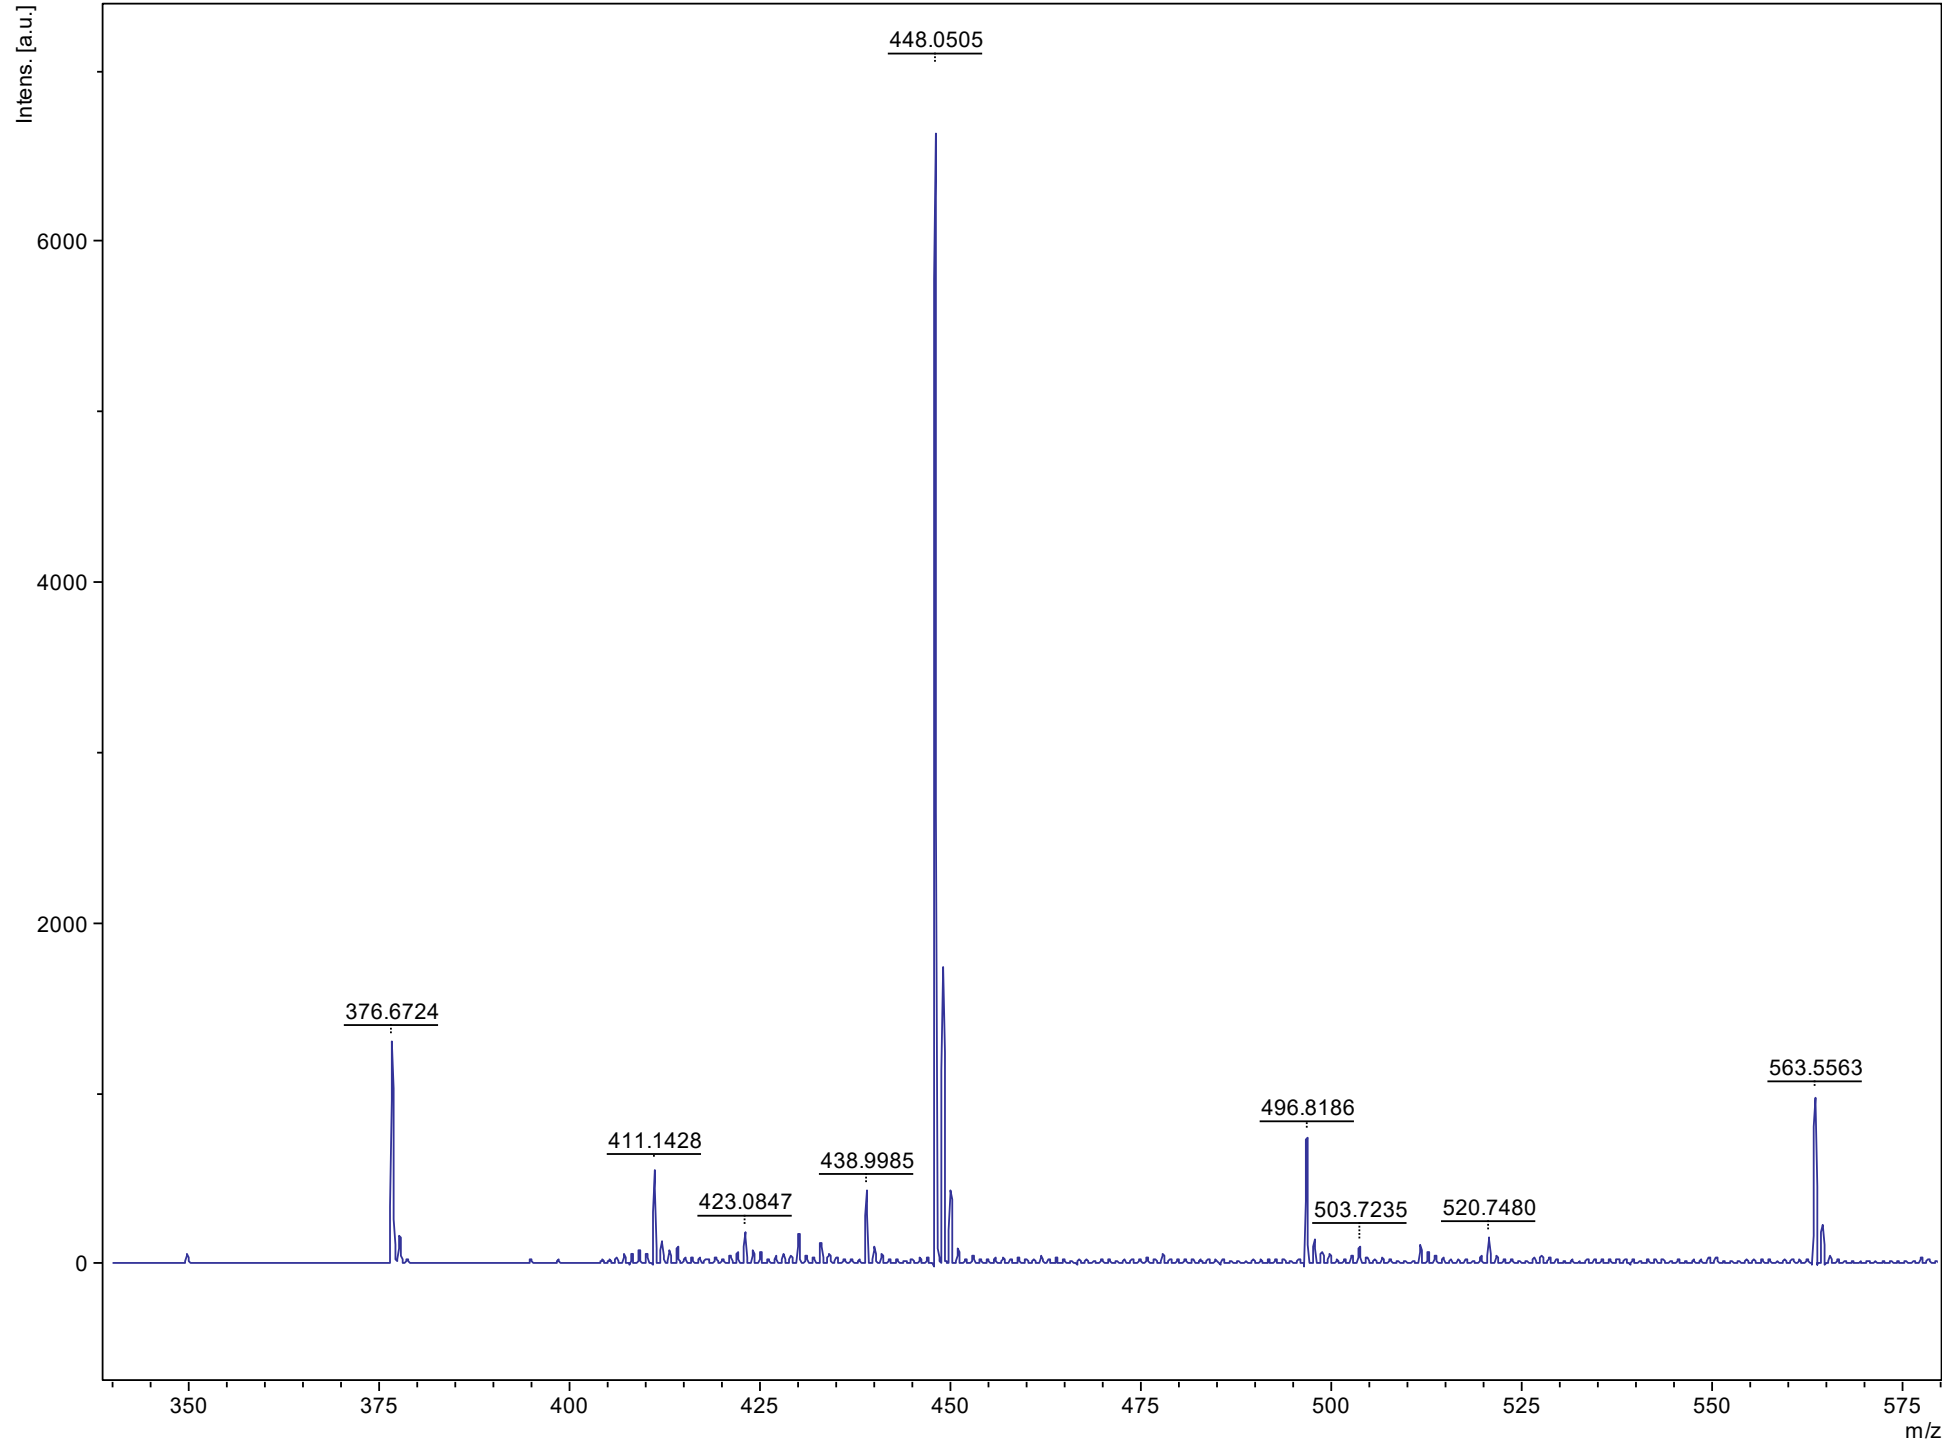

Sample Name: LJC1-34

```

=====
Acq. Operator   : SYSTEM                      Seq. Line :    3
Acq. Instrument : 1220 HPLC                   Location  :   43
Injection Date  : 8/14/2020 3:45:59 PM      Inj       :    1
                                           Inj Volume: 50.000 µl
Method          : C:\Chem32\1\Data\luana 2020-08-14 14-48-41\MOHAMED-SMALL MOLECULE.M (
                : Sequence Method)
Last changed    : 8/14/2020 2:48:44 PM by SYSTEM
Sample Info     : LJC1-34
    
```

Additional Info : Peak(s) manually integrated

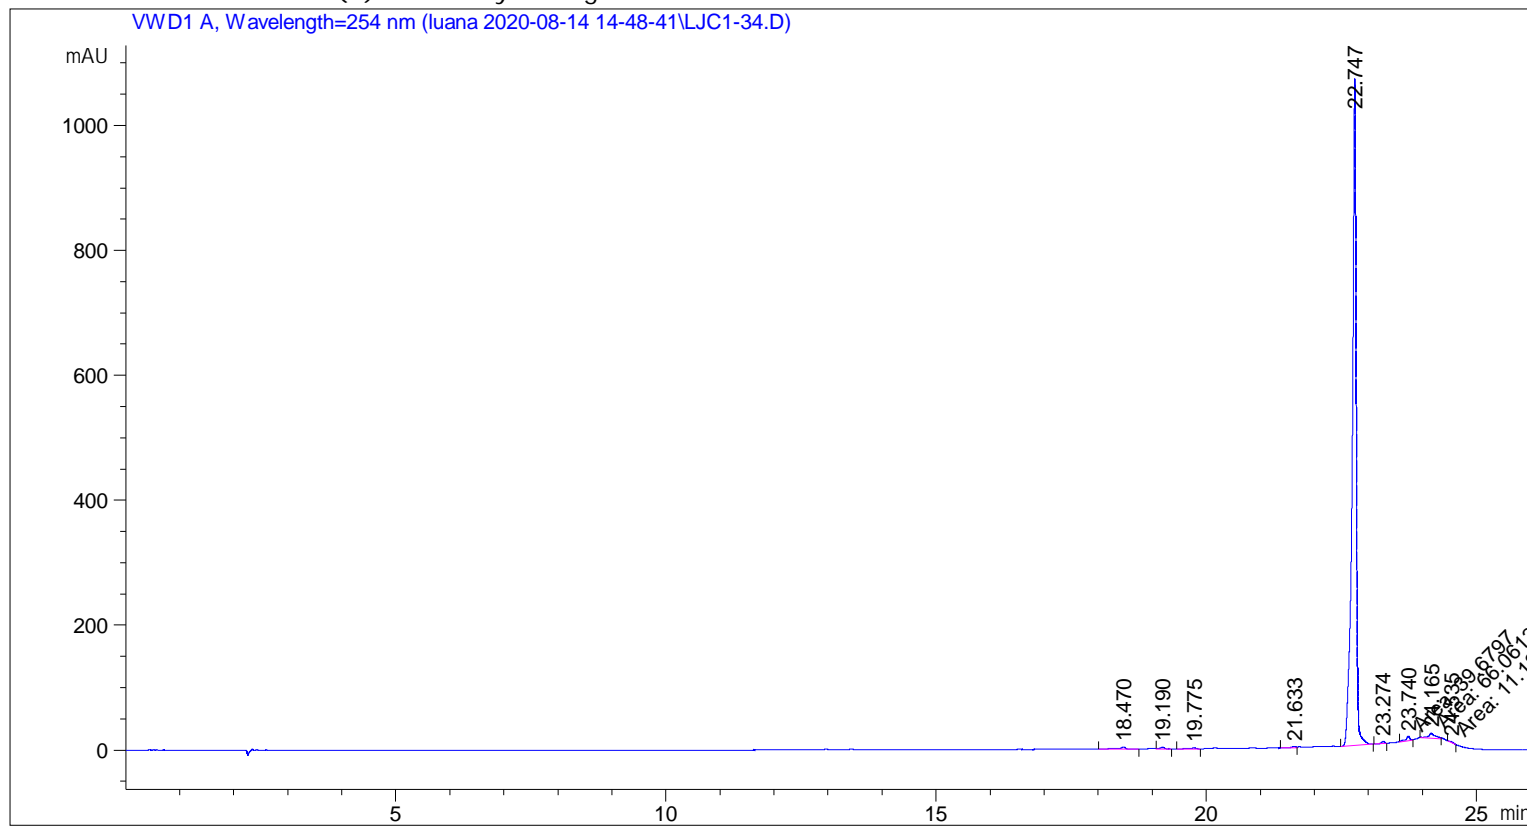

Area Percent Report

```

Sorted By      : Signal
Multiplier     : 1.0000
Dilution      : 1.0000
Use Multiplier & Dilution Factor with ISTDs
    
```

Signal 1: VWD1 A, Wavelength=254 nm

| Peak # | RetTime [min] | Type | Width [min] | Area [mAU*s] | Height [mAU] | Area %  |
|--------|---------------|------|-------------|--------------|--------------|---------|
| 1      | 18.470        | BV R | 0.1257      | 33.29604     | 3.47731      | 0.5814  |
| 2      | 19.190        | VV R | 0.0837      | 17.15664     | 2.66021      | 0.2996  |
| 3      | 19.775        | BB   | 0.0916      | 12.17624     | 1.72954      | 0.2126  |
| 4      | 21.633        | BV   | 0.0753      | 11.09774     | 1.82887      | 0.1938  |
| 5      | 22.747        | BB   | 0.0744      | 5522.29590   | 1066.95020   | 96.4195 |
| 6      | 23.274        | VB R | 0.0668      | 14.47833     | 3.19846      | 0.2528  |
| 7      | 23.740        | MM   | 0.0897      | 39.67970     | 7.37479      | 0.6928  |



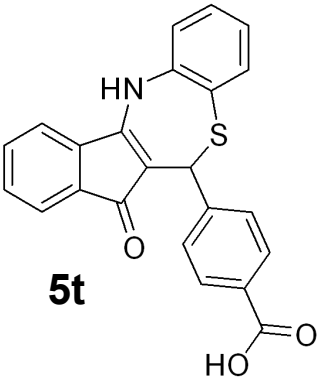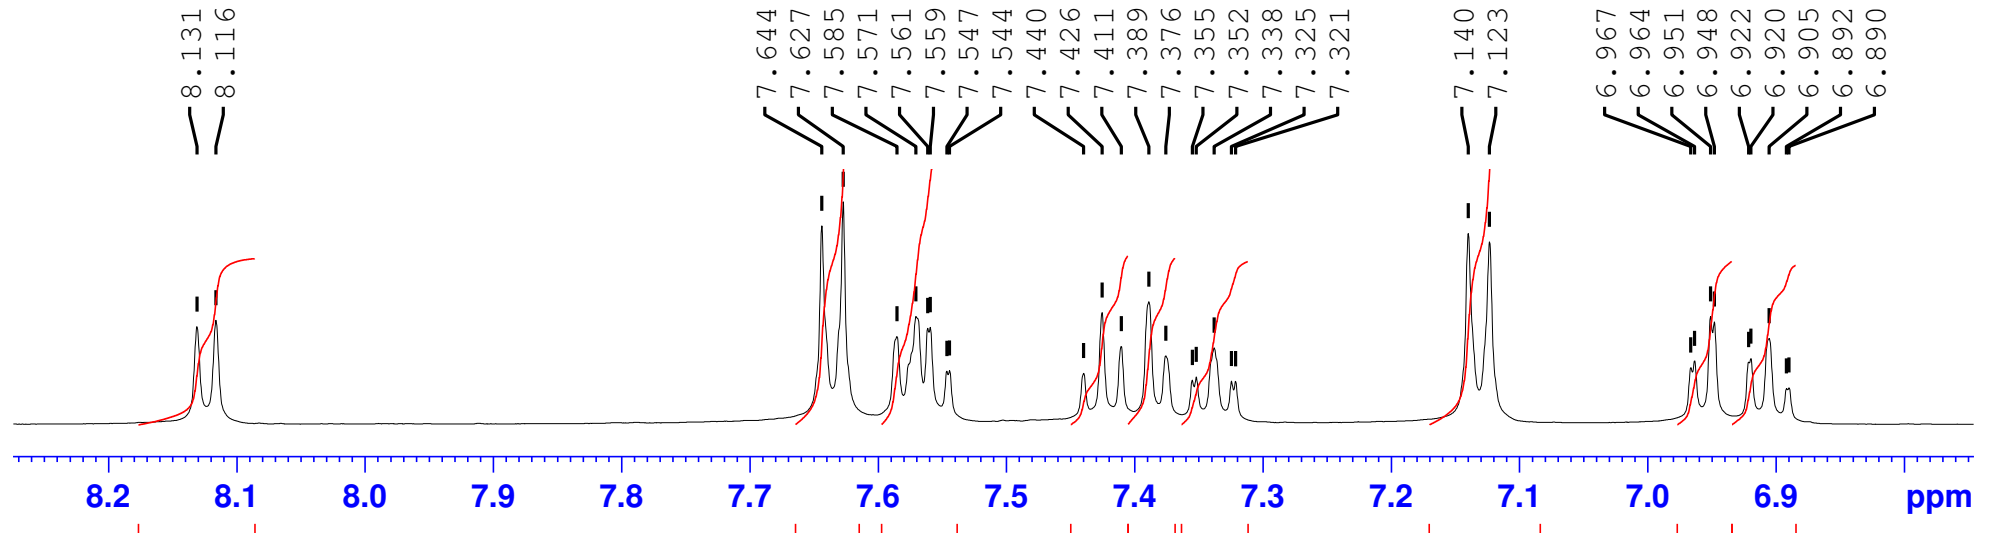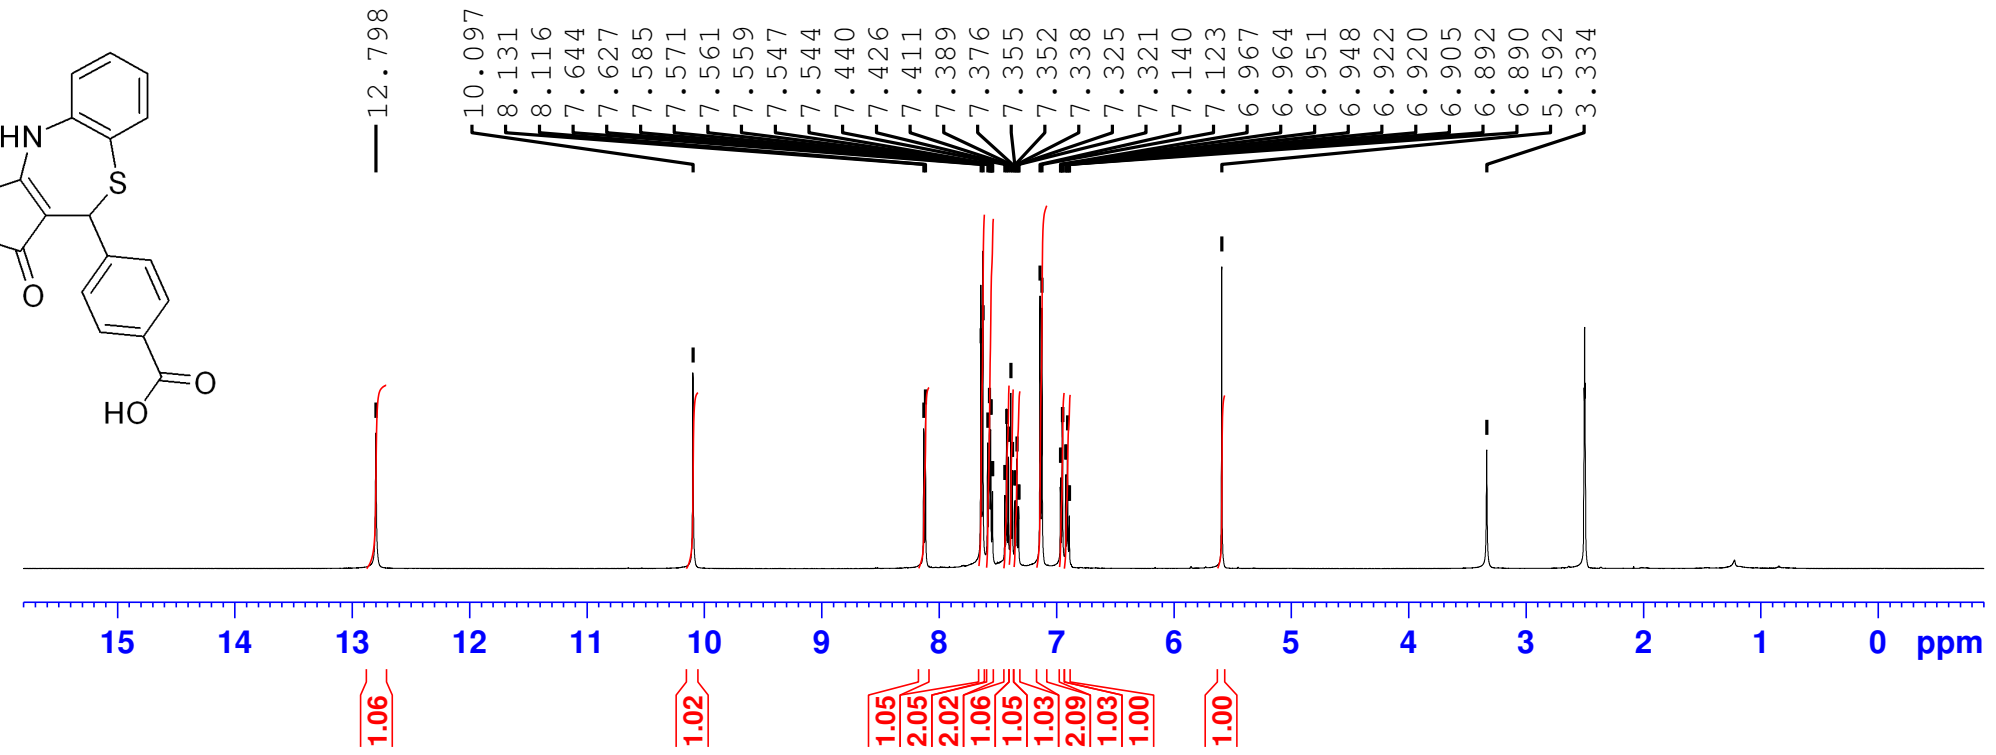

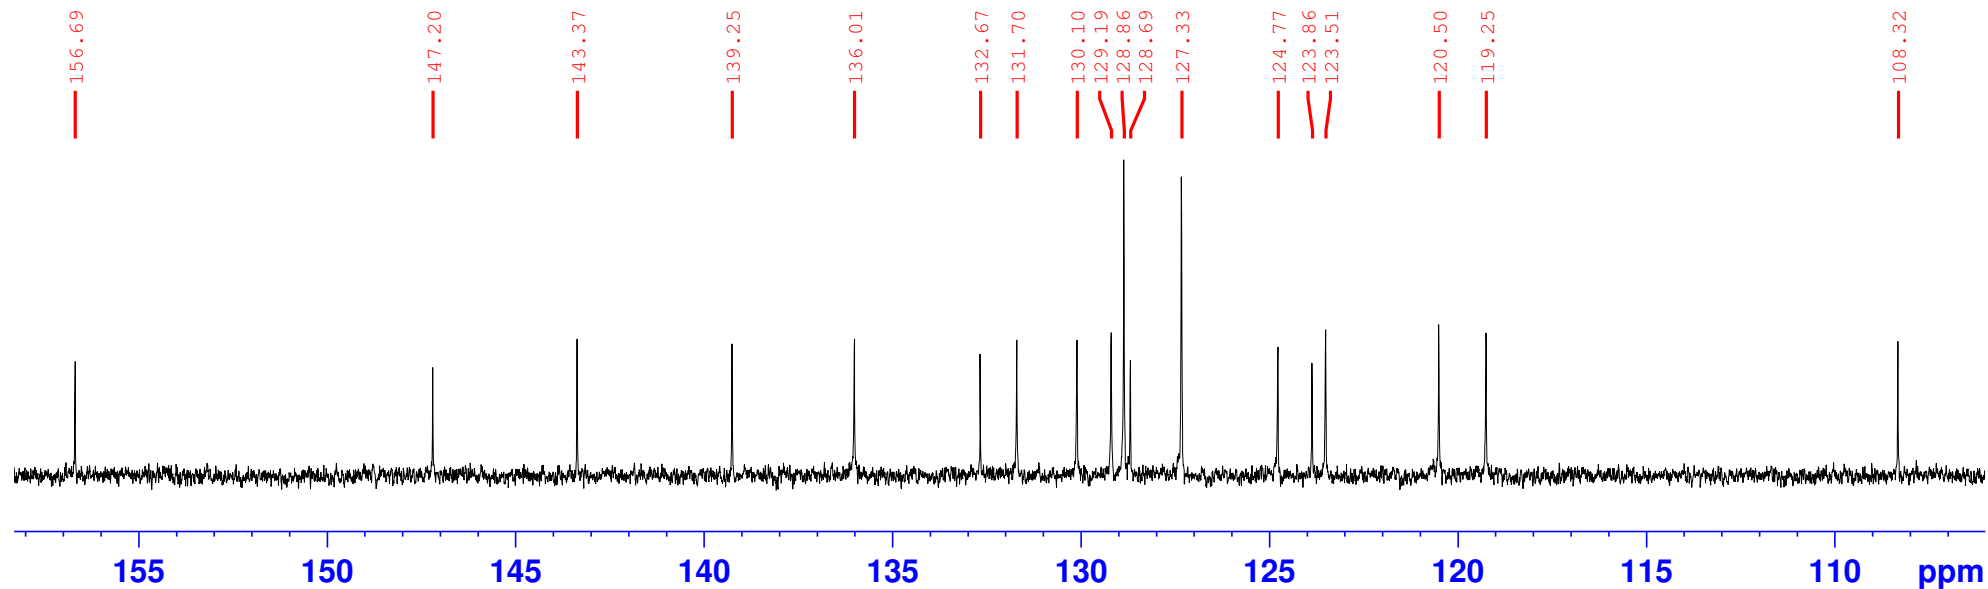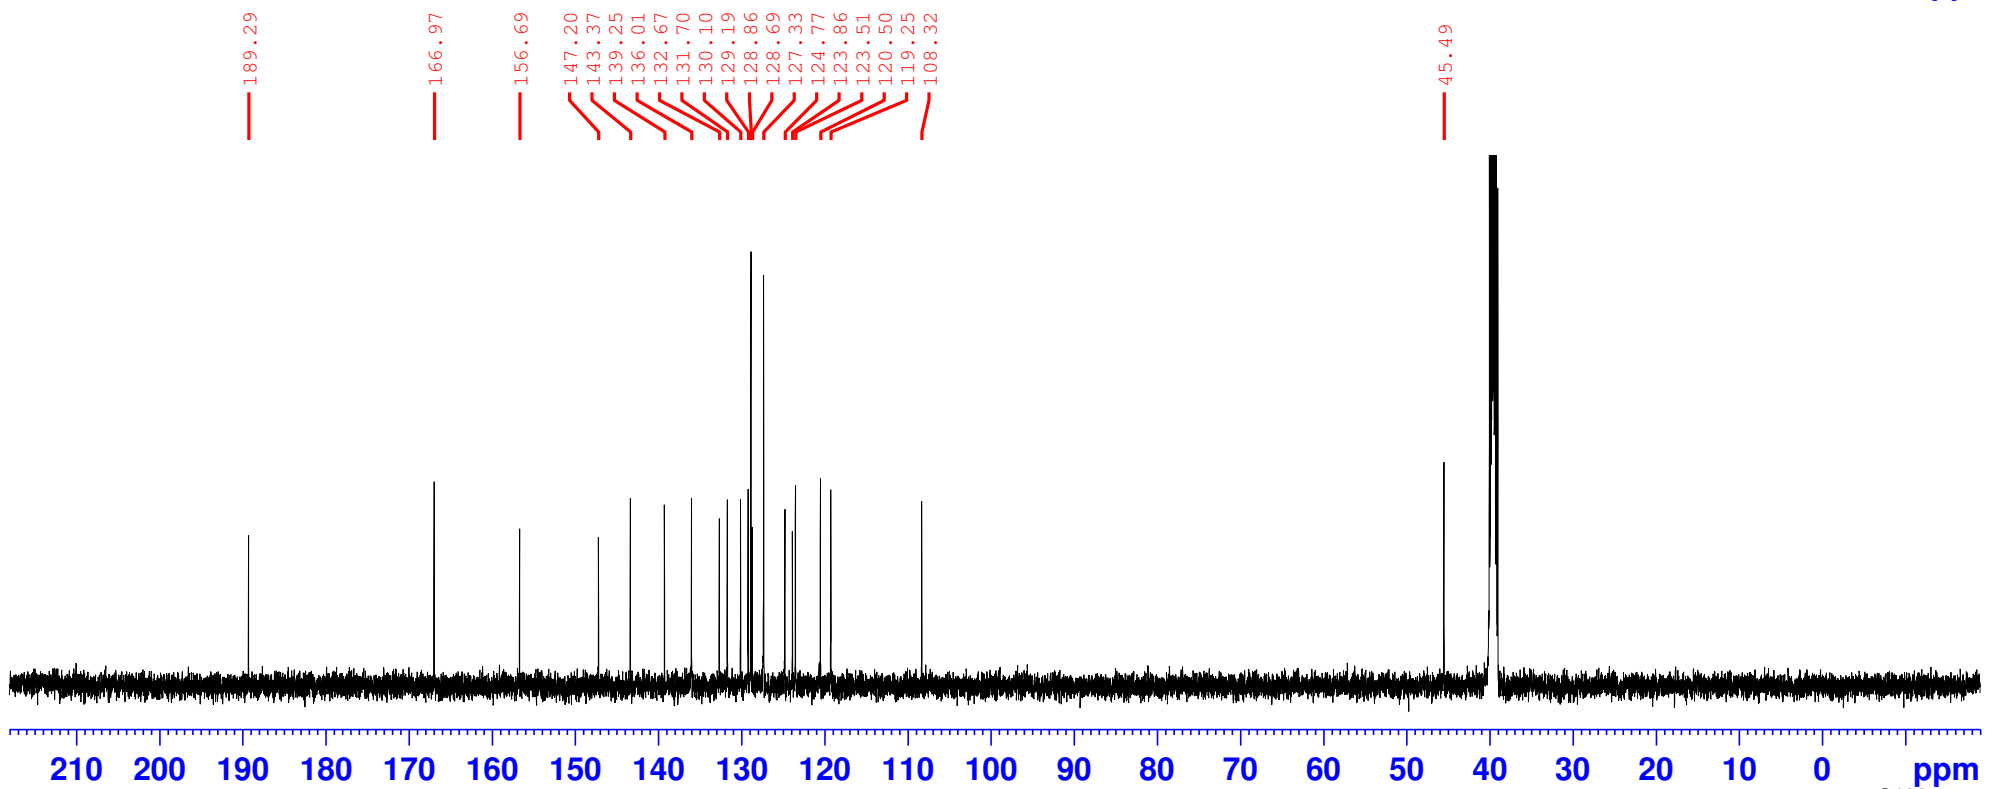

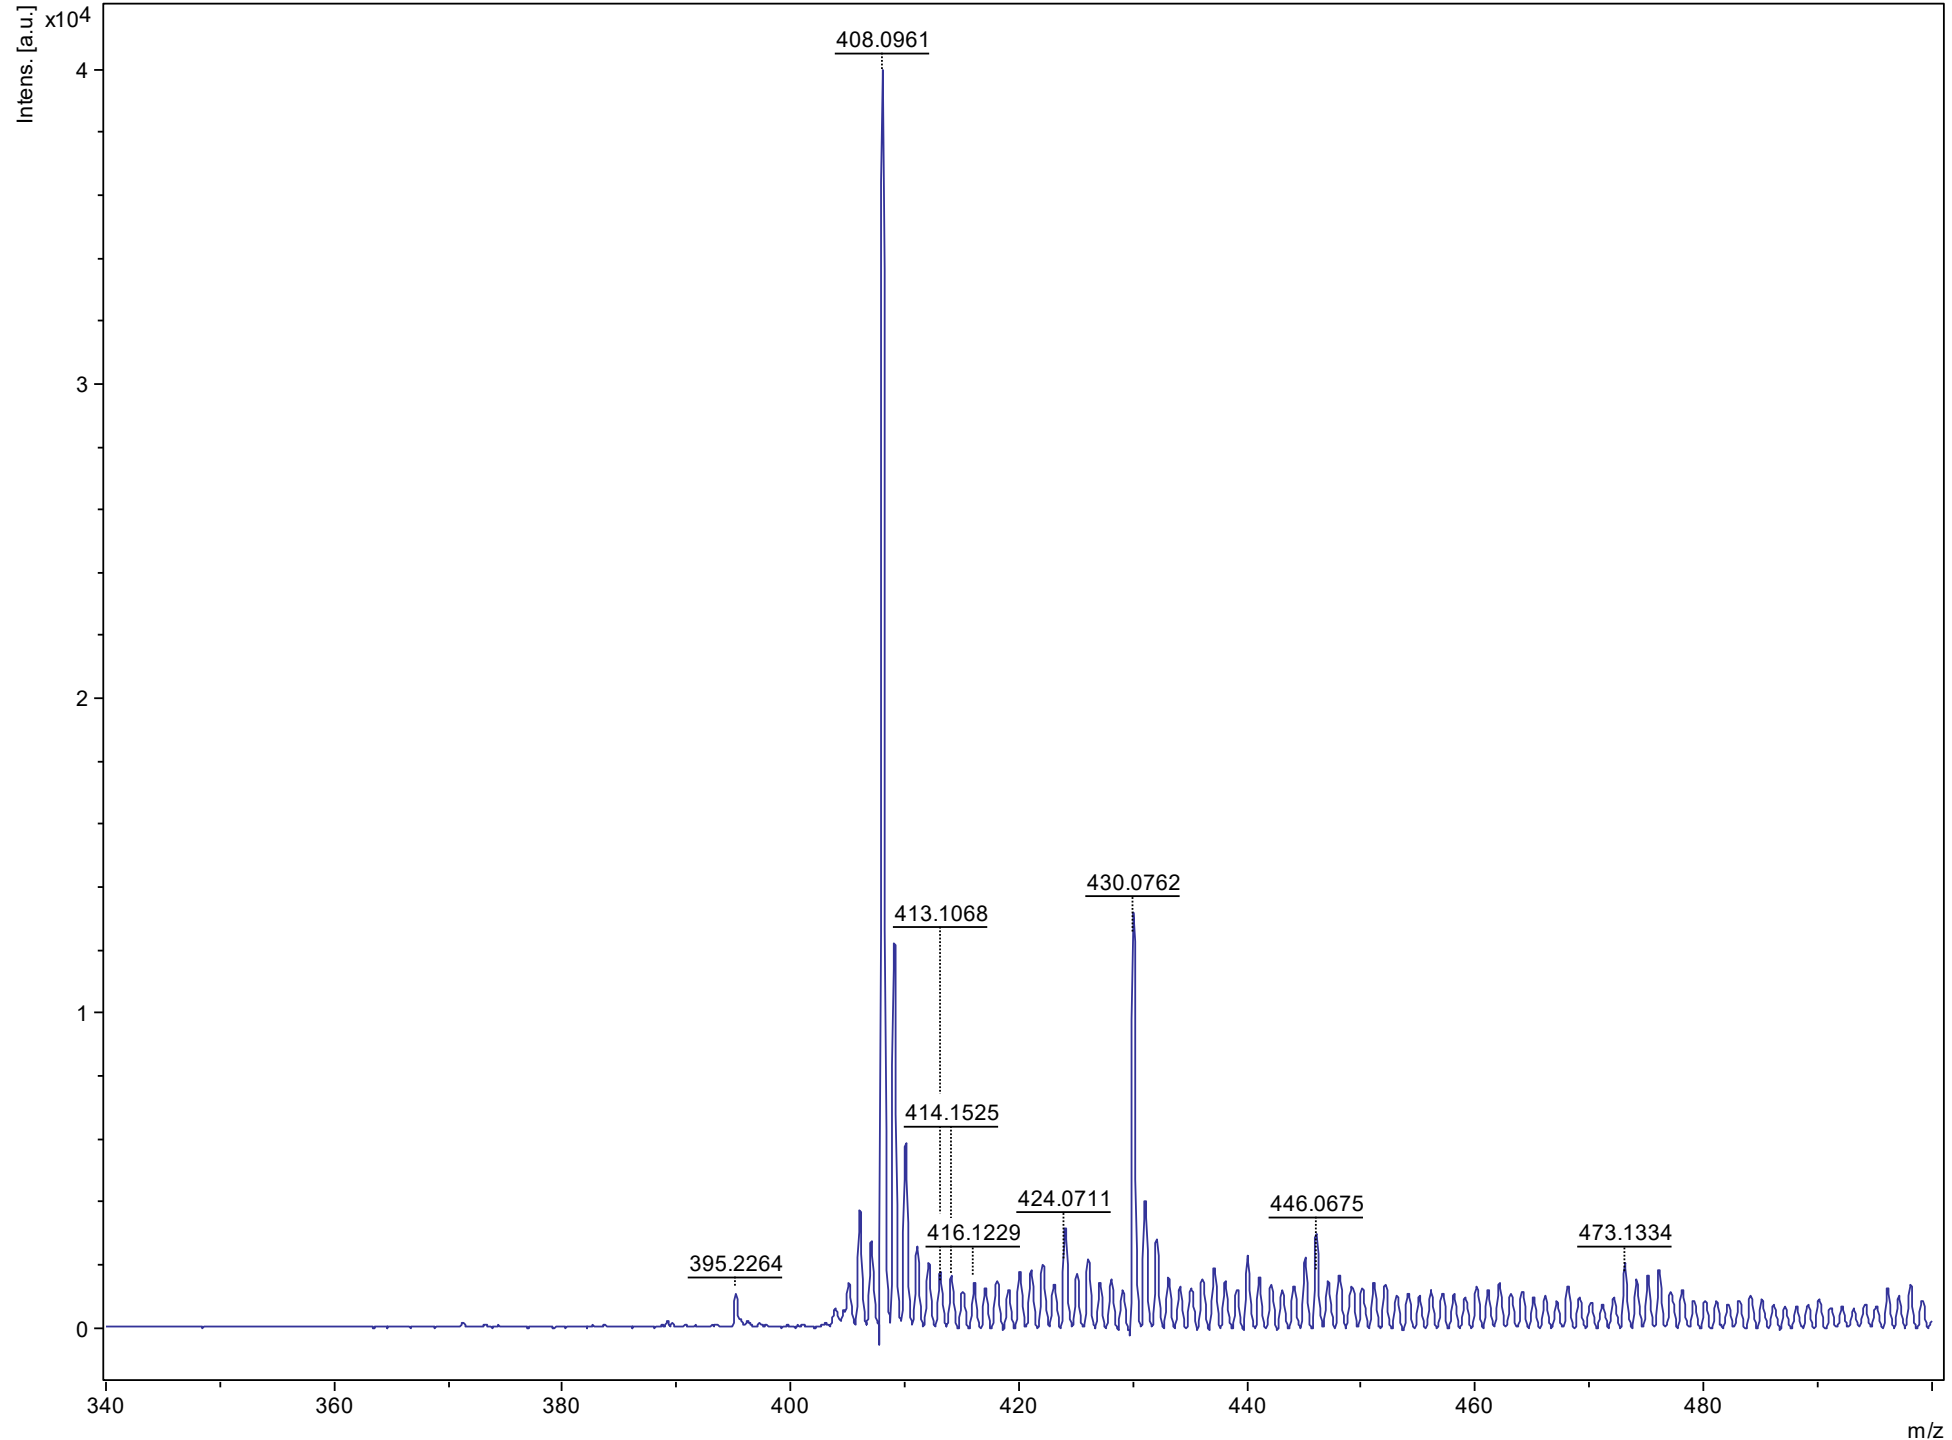

```

=====
Acq. Operator   : SYSTEM                      Seq. Line :    1
Acq. Instrument : 1220 HPLC                   Location  :    7
Injection Date  : 10/6/2020 9:10:13 AM       Inj       :    1
                                           Inj Volume: 30.000 µl
Different Inj Volume from Sample Entry! Actual Inj Volume : 50.000 µl
Method          : C:\Chem32\1\Data\luana 2020-10-06 09-08-33\MOHAMED-SMALL MOLECULE.M (
                : Sequence Method)
Last changed    : 10/6/2020 9:08:37 AM by SYSTEM
Method Info     : Water/MeOH

Sample Info     : LJC 1-40 (RE-pur.)
  
```

Additional Info : Peak(s) manually integrated

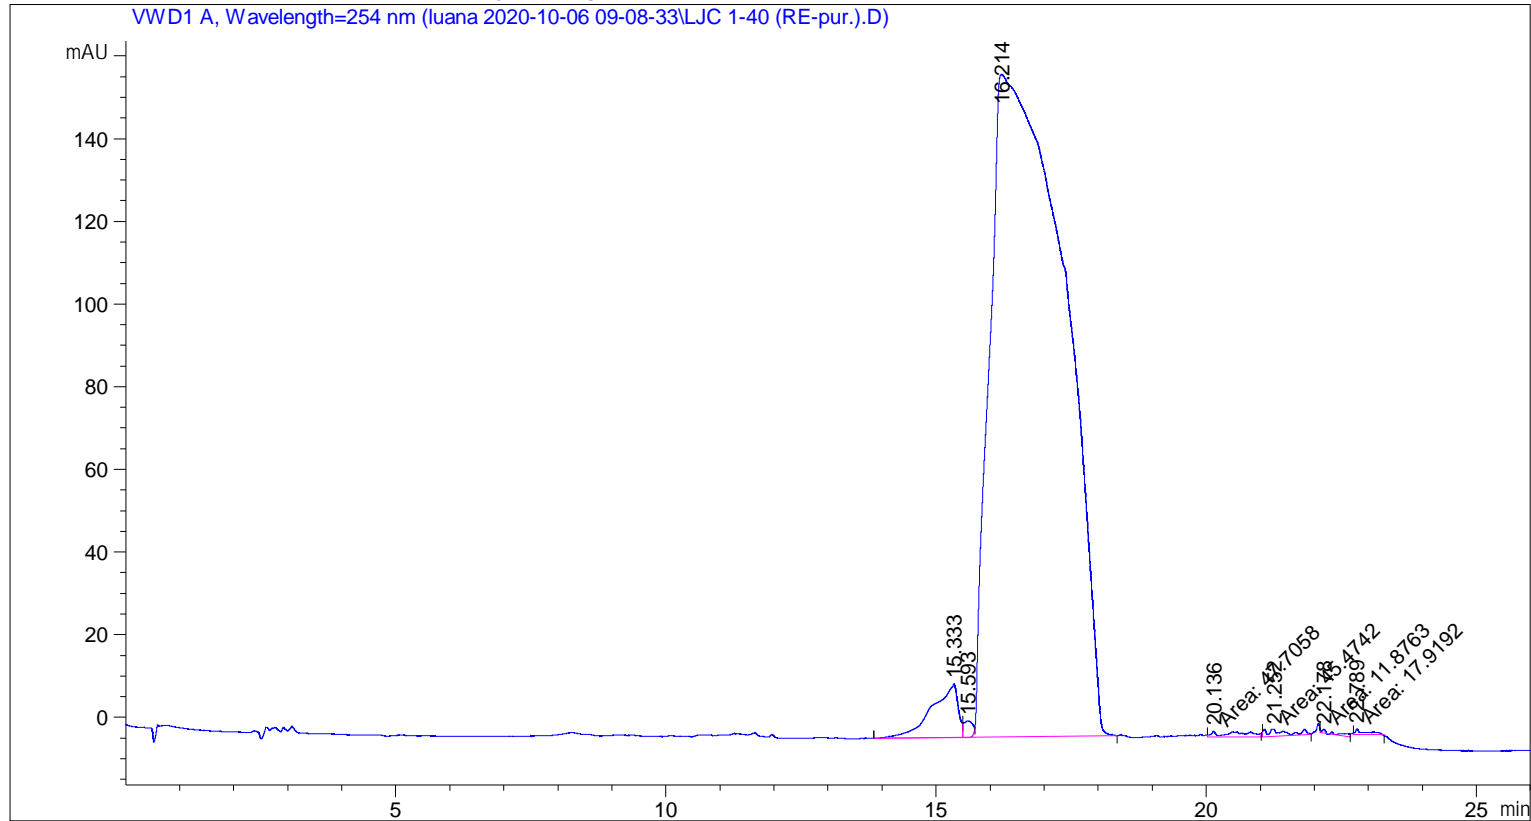

Area Percent Report

```

Sorted By      : Signal
Multiplier     : 1.0000
Dilution      : 1.0000
Use Multiplier & Dilution Factor with ISTDs
  
```

Signal 1: VWD1 A, Wavelength=254 nm

| Peak # | RetTime [min] | Type | Width [min] | Area [mAU*s] | Height [mAU] | Area %  |
|--------|---------------|------|-------------|--------------|--------------|---------|
| 1      | 15.333        | BV E | 0.4104      | 437.84741    | 13.04955     | 2.7750  |
| 2      | 15.593        | VV E | 0.1271      | 43.01480     | 3.99643      | 0.2726  |
| 3      | 16.214        | VB R | 1.1059      | 1.51747e4    | 160.30304    | 96.1730 |
| 4      | 20.136        | MM   | 0.5827      | 47.70582     | 1.36456      | 0.3023  |

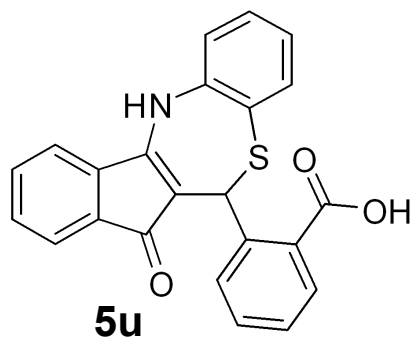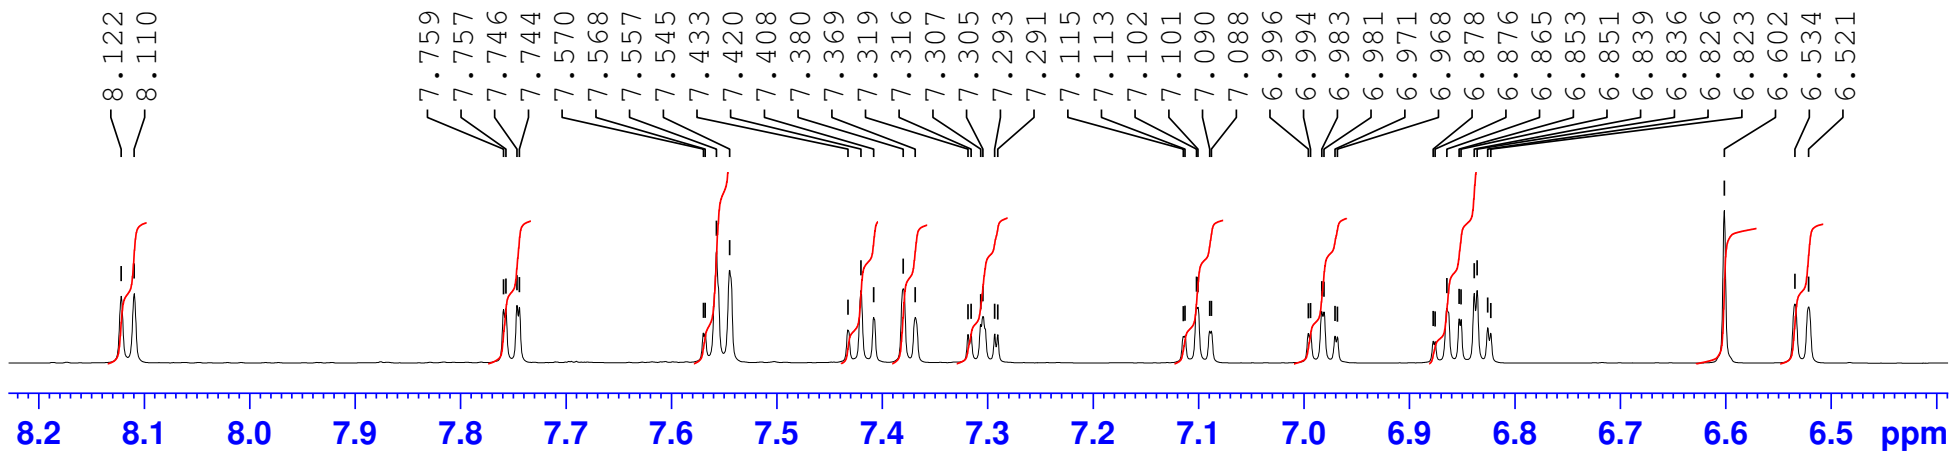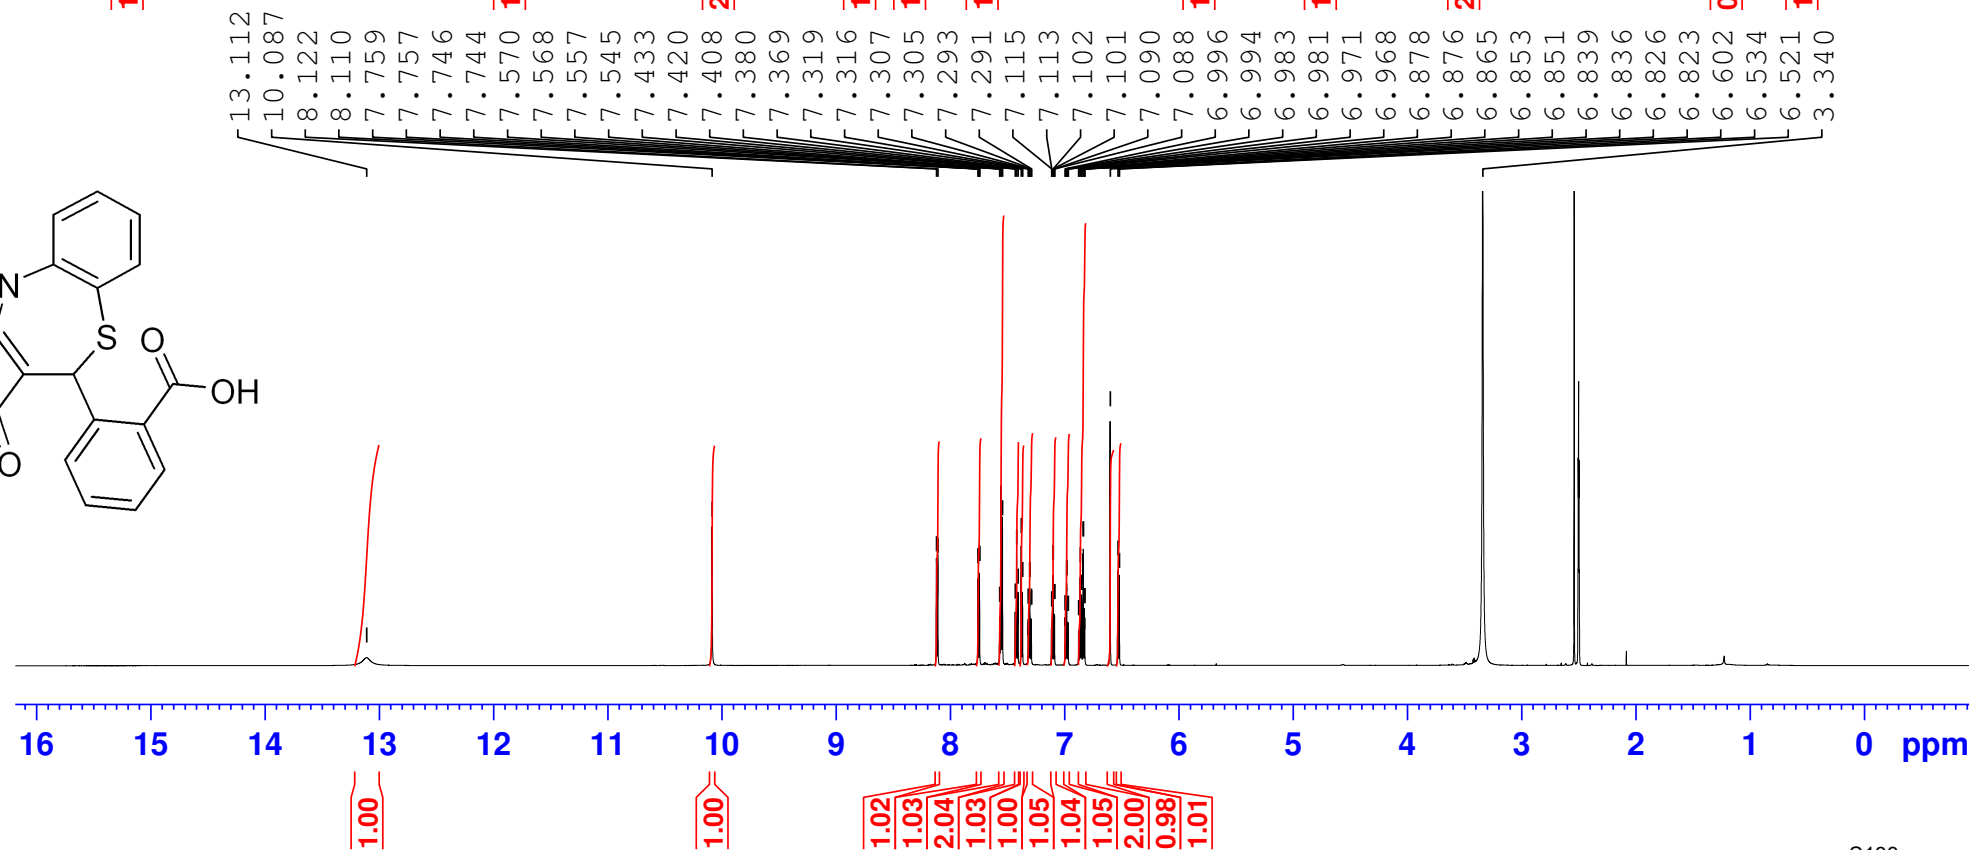

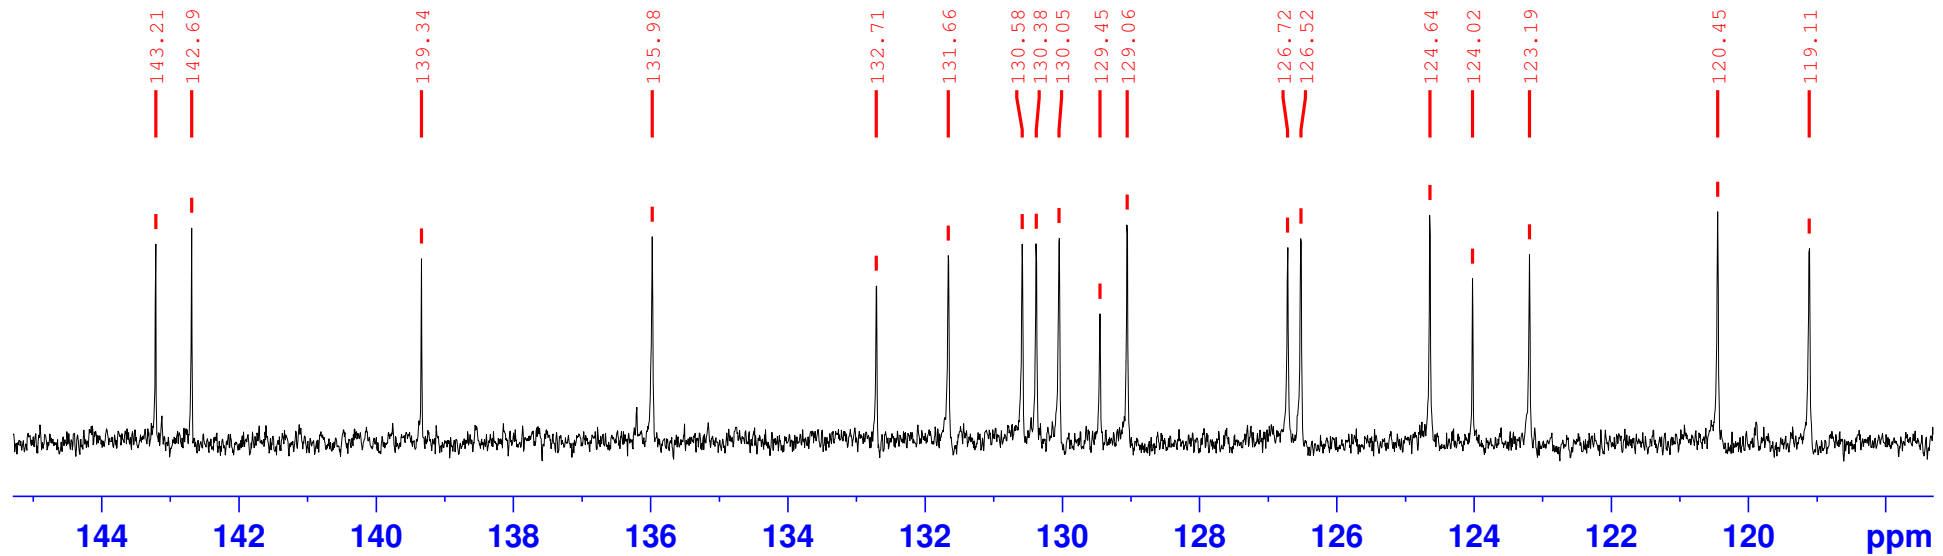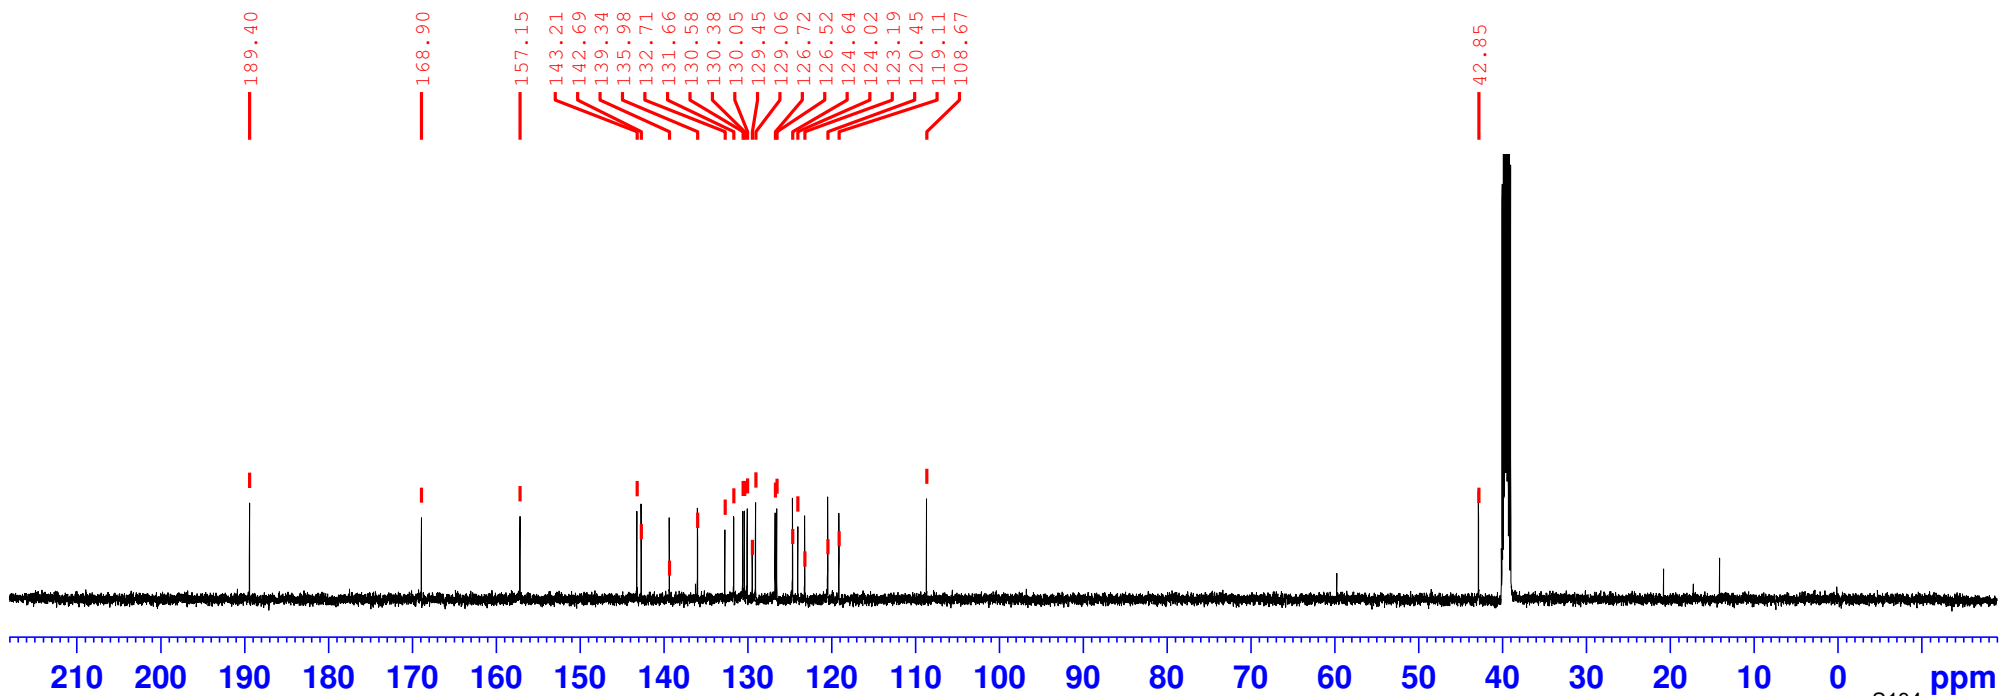

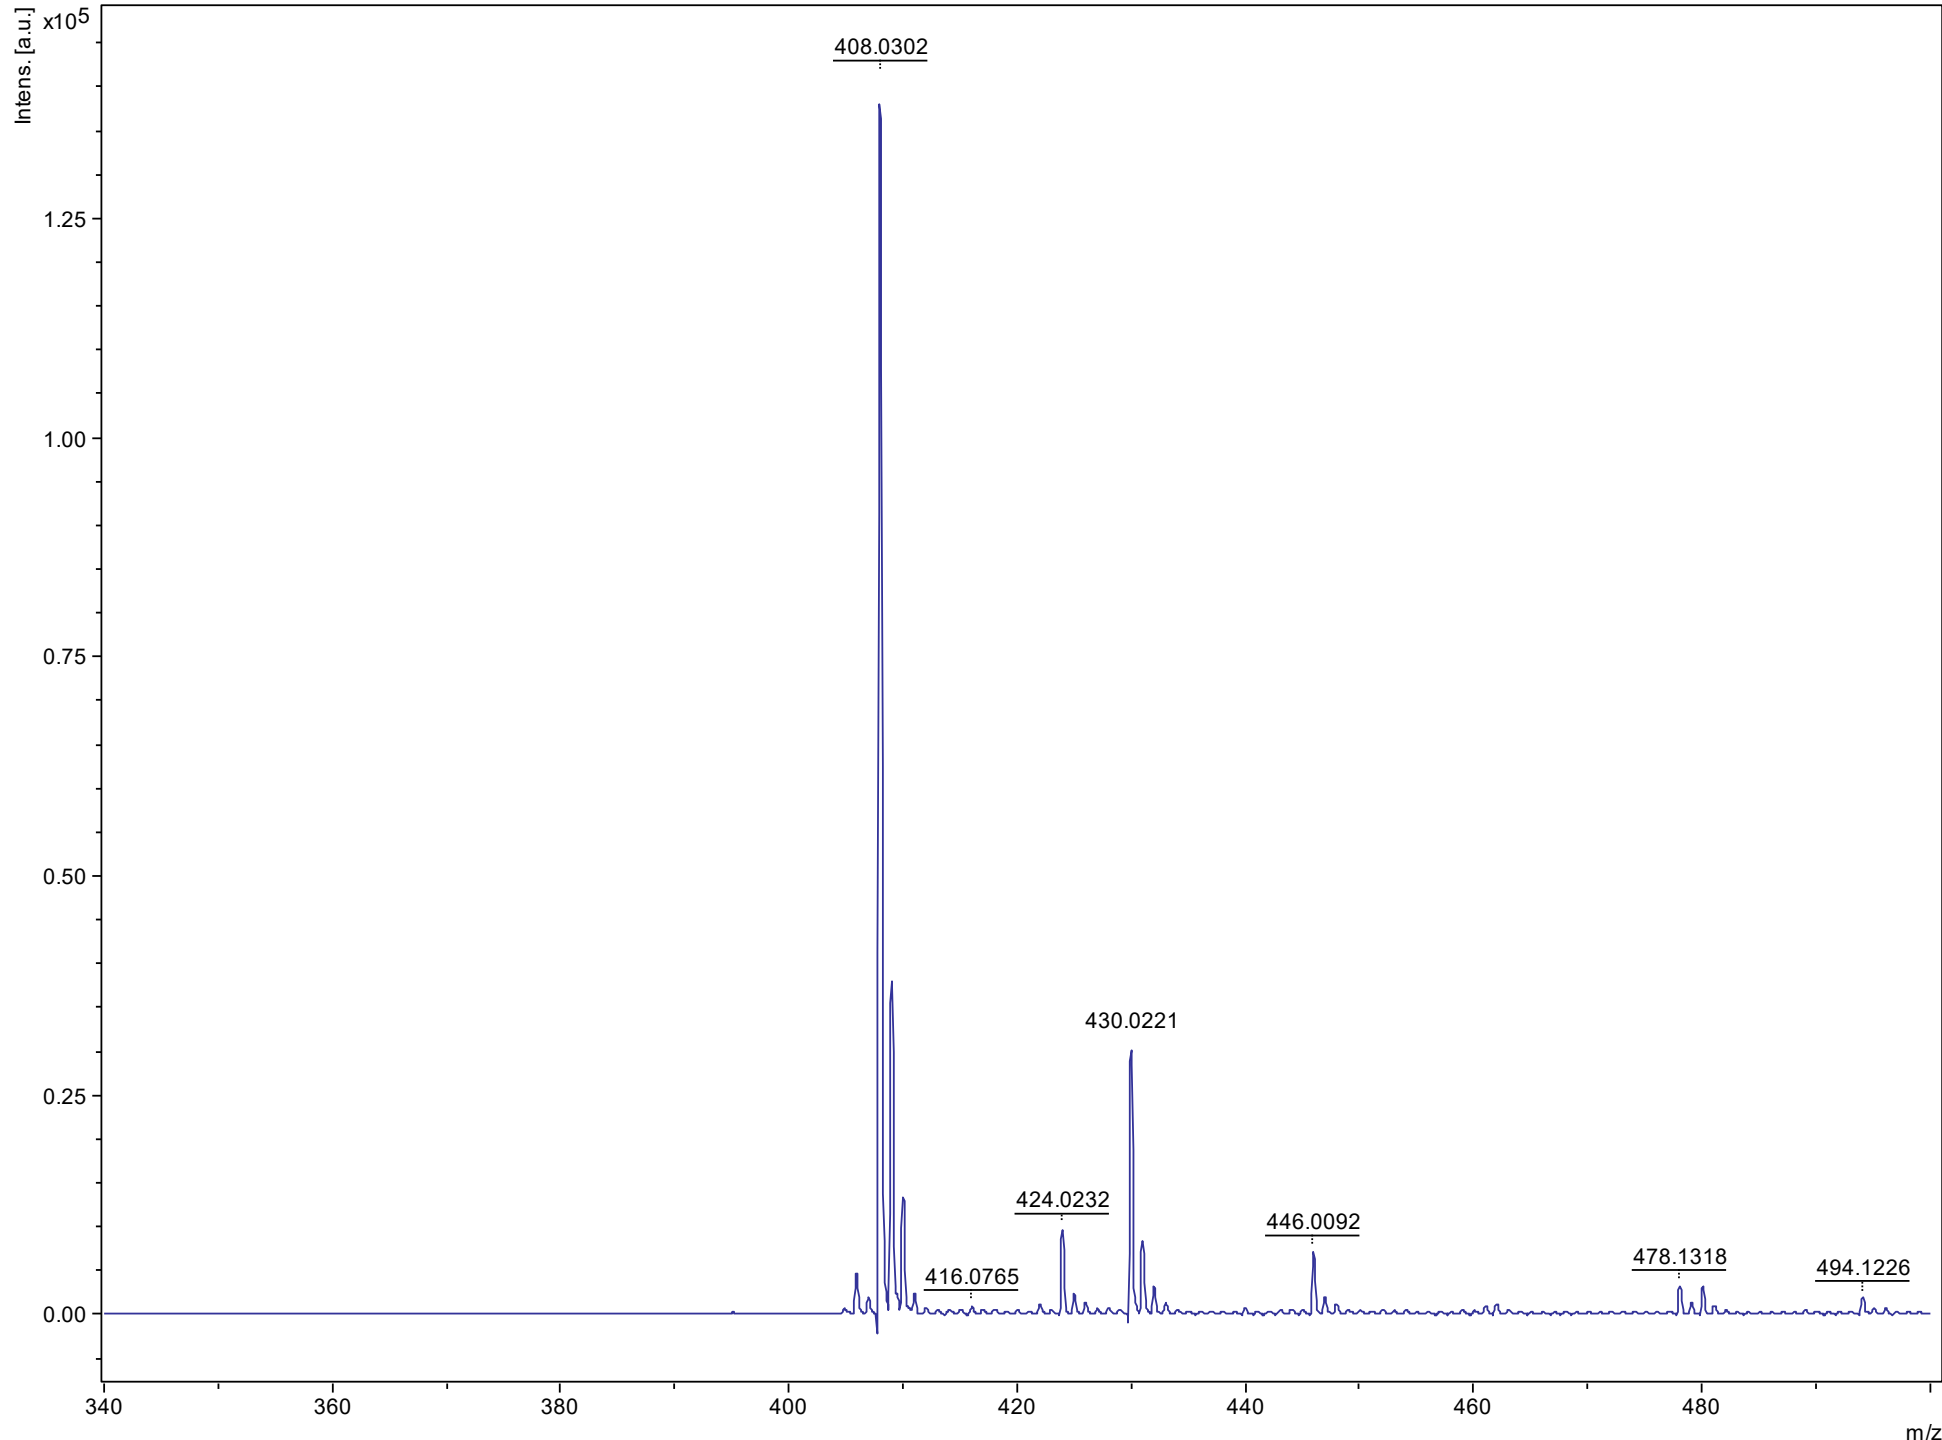

Sample Name: LJC1-42 pos rep

```

=====
Acq. Operator   : SYSTEM                      Seq. Line :    3
Acq. Instrument : 1220 HPLC                    Location  :   11
Injection Date  : 10/17/2020 11:39:45 AM      Inj       :    1
                                           Inj Volume: 30.000 µl
Different Inj Volume from Sample Entry! Actual Inj Volume : 50.000 µl
Method          : C:\Chem32\1\Data\luana 2020-10-17 10-44-33\MOHAMED-SMALL MOLECULE.M (
                Sequence Method)
Last changed    : 10/17/2020 11:15:13 AM by SYSTEM
Method Info     : Water/MeOH
    
```

Sample Info : LJC1-42 pos rep

Additional Info : Peak(s) manually integrated

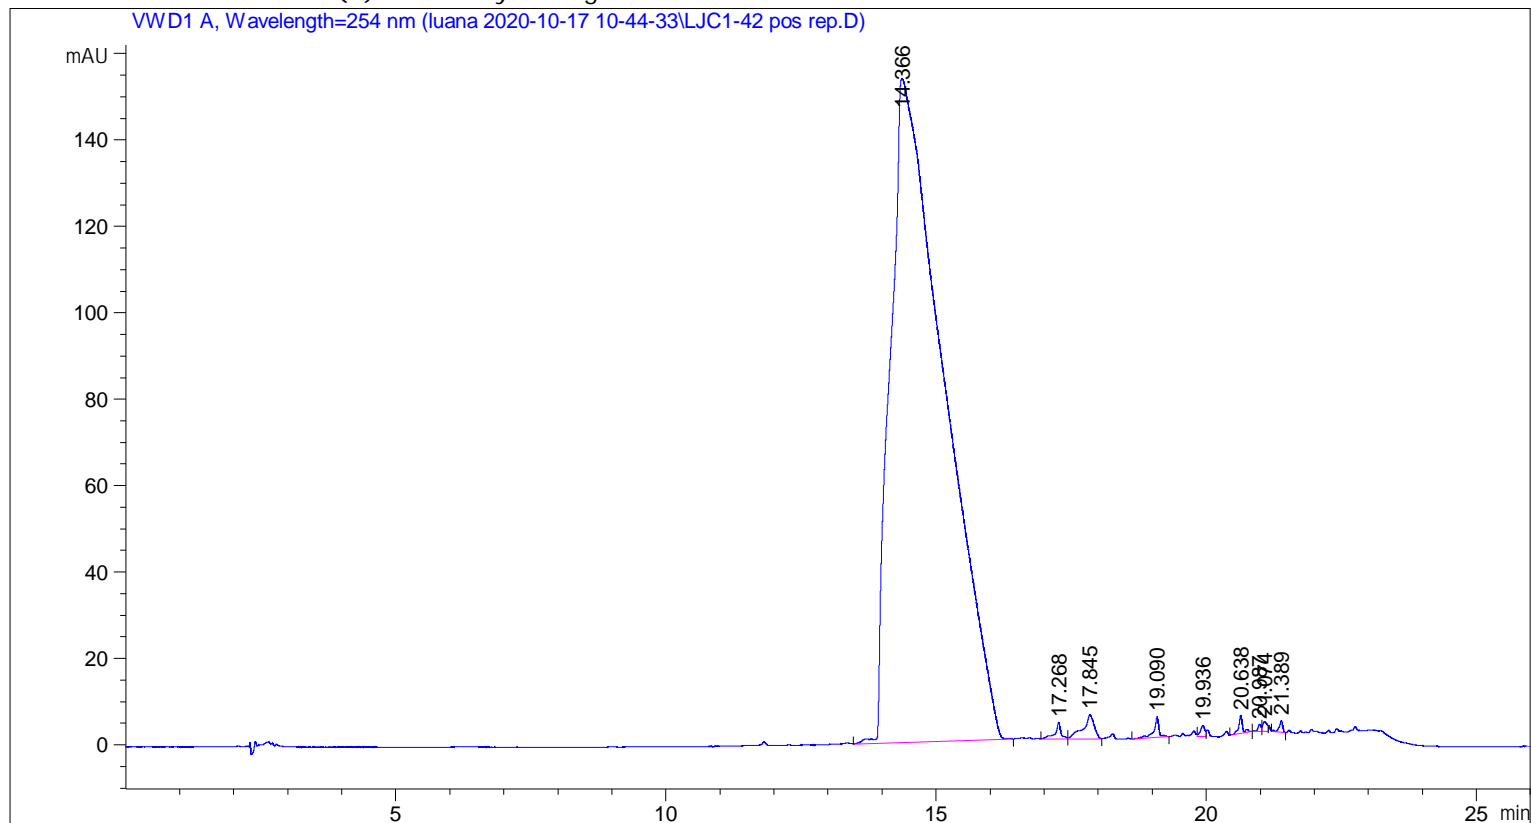

Area Percent Report

```

Sorted By      : Signal
Multiplier     : 1.0000
Dilution       : 1.0000
Use Multiplier & Dilution Factor with ISTDs
    
```

Signal 1: VWD1 A, Wavelength=254 nm

| Peak # | RetTime [min] | Type | Width [min] | Area [mAU*s] | Height [mAU] | Area %  |
|--------|---------------|------|-------------|--------------|--------------|---------|
| 1      | 14.366        | VV R | 0.8197      | 1.05179e4    | 153.63815    | 97.9931 |
| 2      | 17.268        | VV R | 0.1030      | 30.27498     | 3.88028      | 0.2821  |
| 3      | 17.845        | VV   | 0.1820      | 82.60709     | 5.60473      | 0.7696  |
| 4      | 19.090        | VV R | 0.0963      | 34.14436     | 4.84245      | 0.3181  |



| Peak # | RetTime [min] | Type | Width [min] | Area [mAU*s] | Height [mAU] | Area % |
|--------|---------------|------|-------------|--------------|--------------|--------|
| 5      | 19.936        | VV   | 0.0798      | 14.41827     | 2.53832      | 0.1343 |
| 6      | 20.638        | VV R | 0.0757      | 22.44223     | 4.24518      | 0.2091 |
| 7      | 20.987        | BV   | 0.0580      | 6.96932      | 1.71201      | 0.0649 |
| 8      | 21.074        | VV   | 0.0719      | 12.46015     | 2.29194      | 0.1161 |
| 9      | 21.389        | VB R | 0.0618      | 12.09581     | 2.72602      | 0.1127 |

Totals : 1.07333e4 181.47908

=====  
\*\*\* End of Report \*\*\*

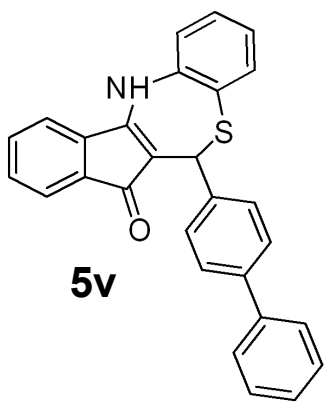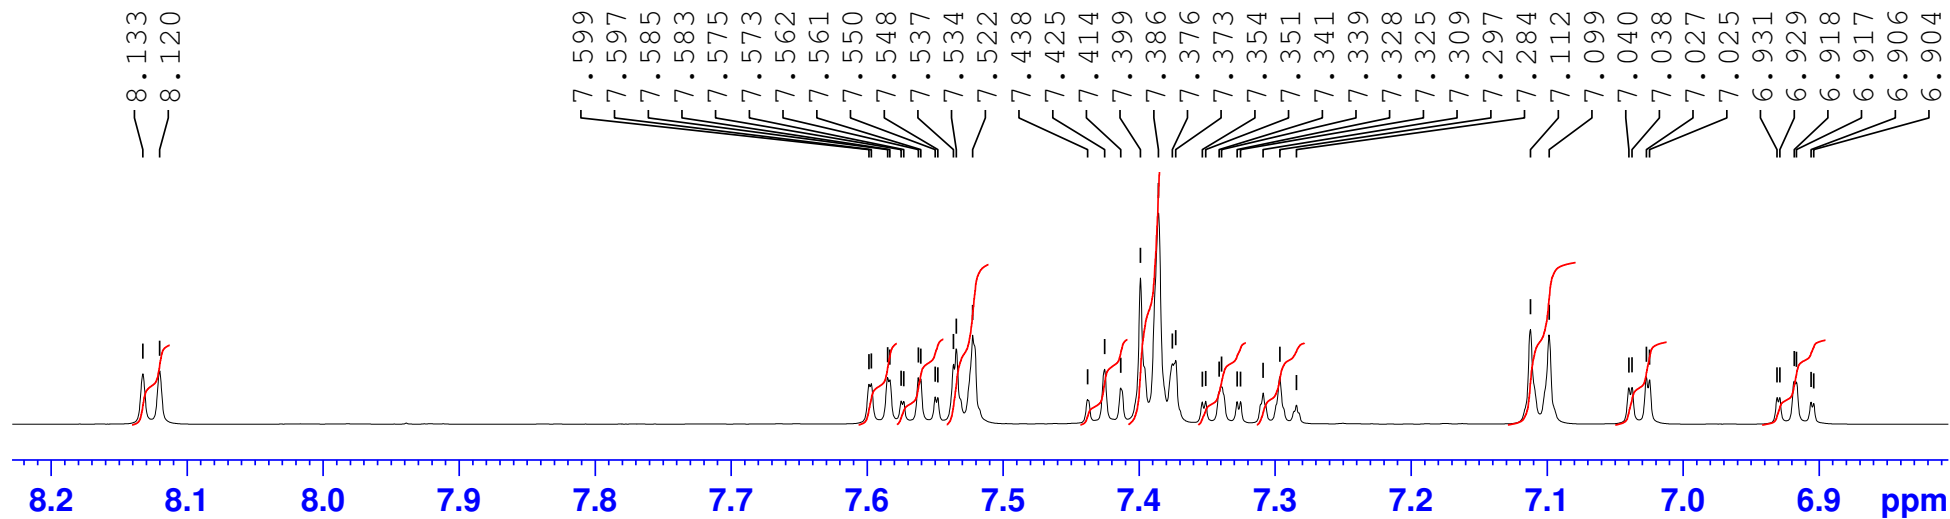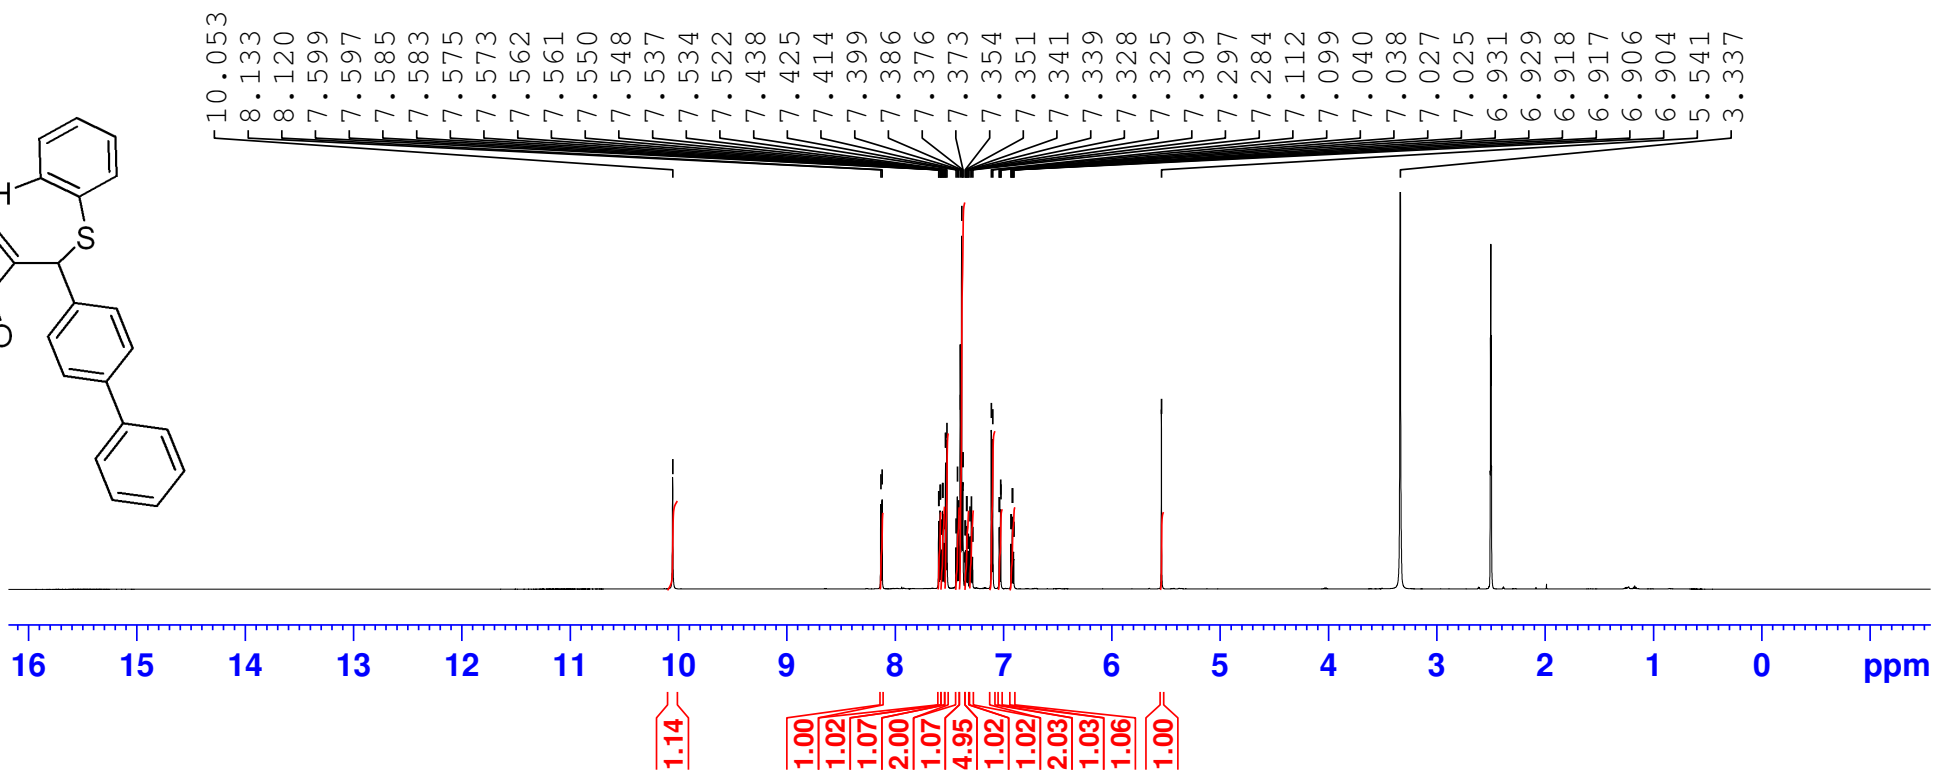

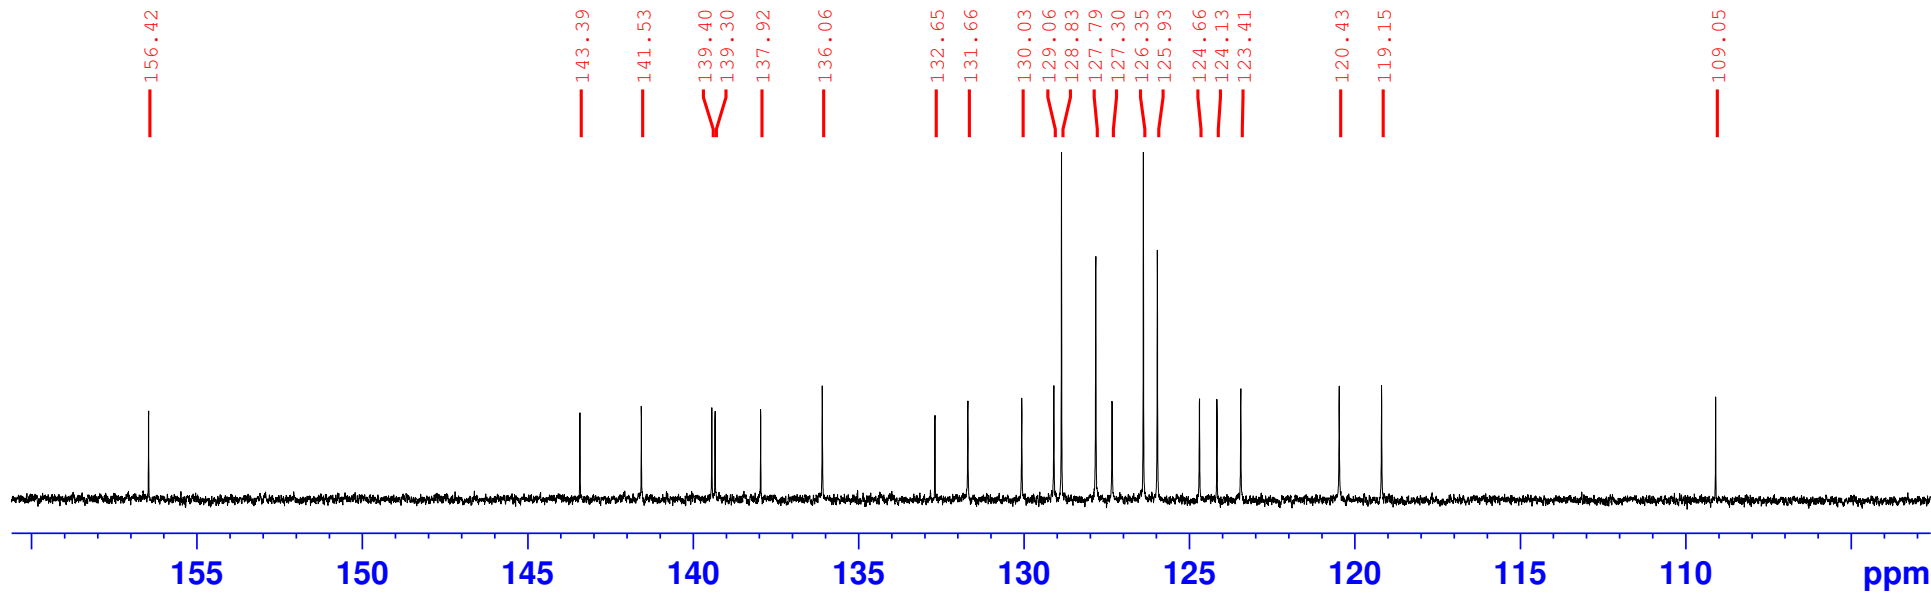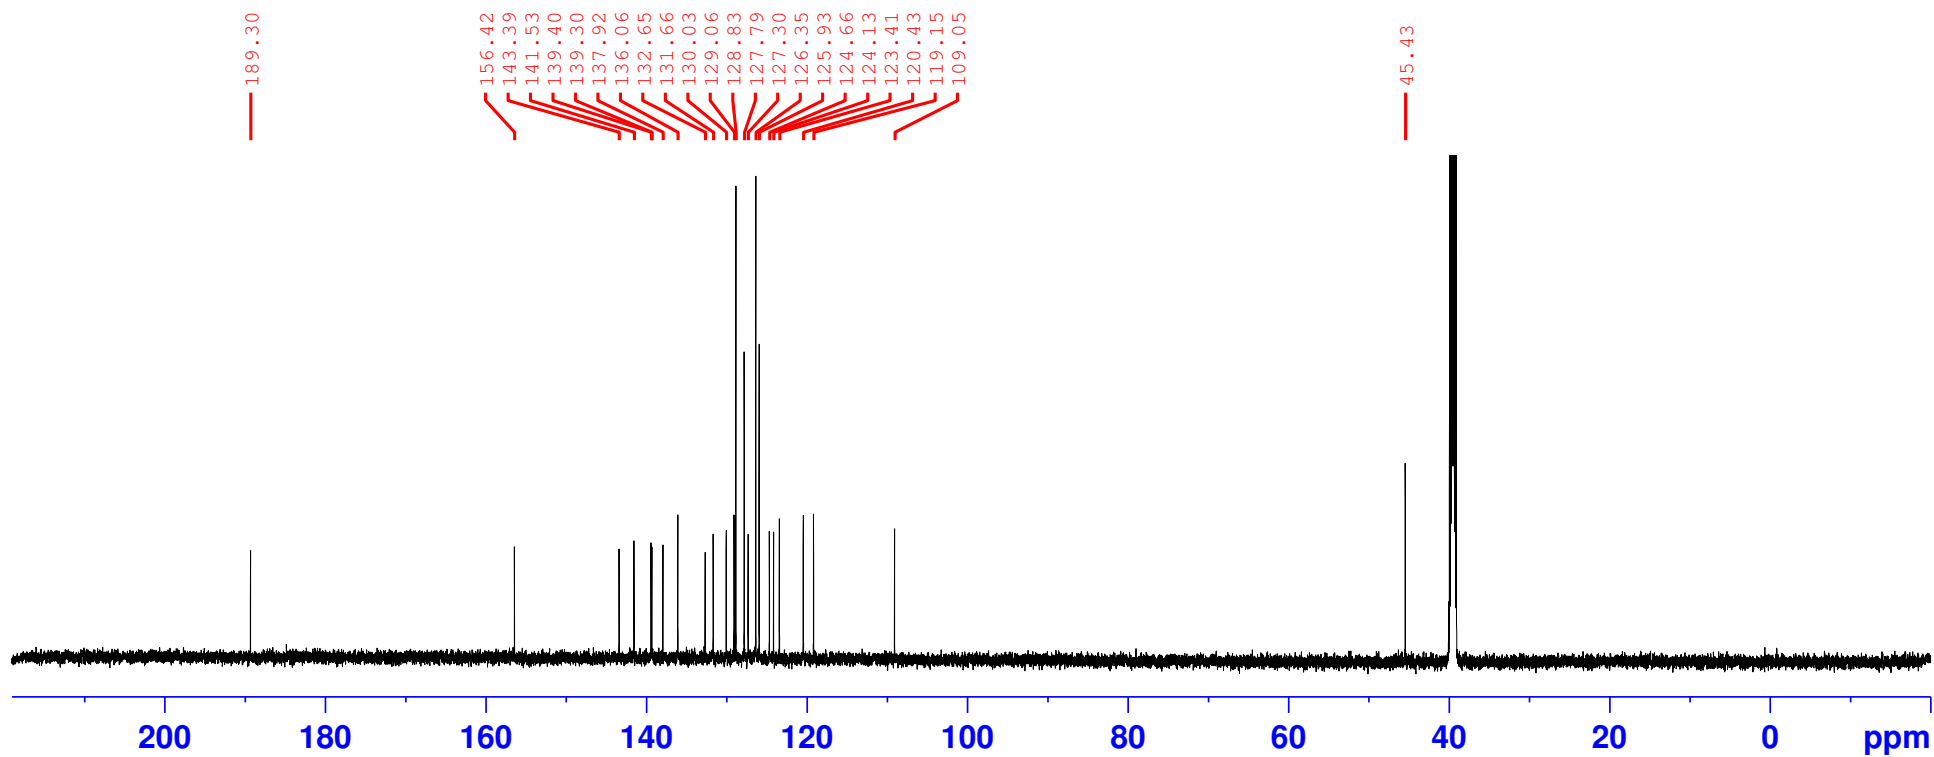

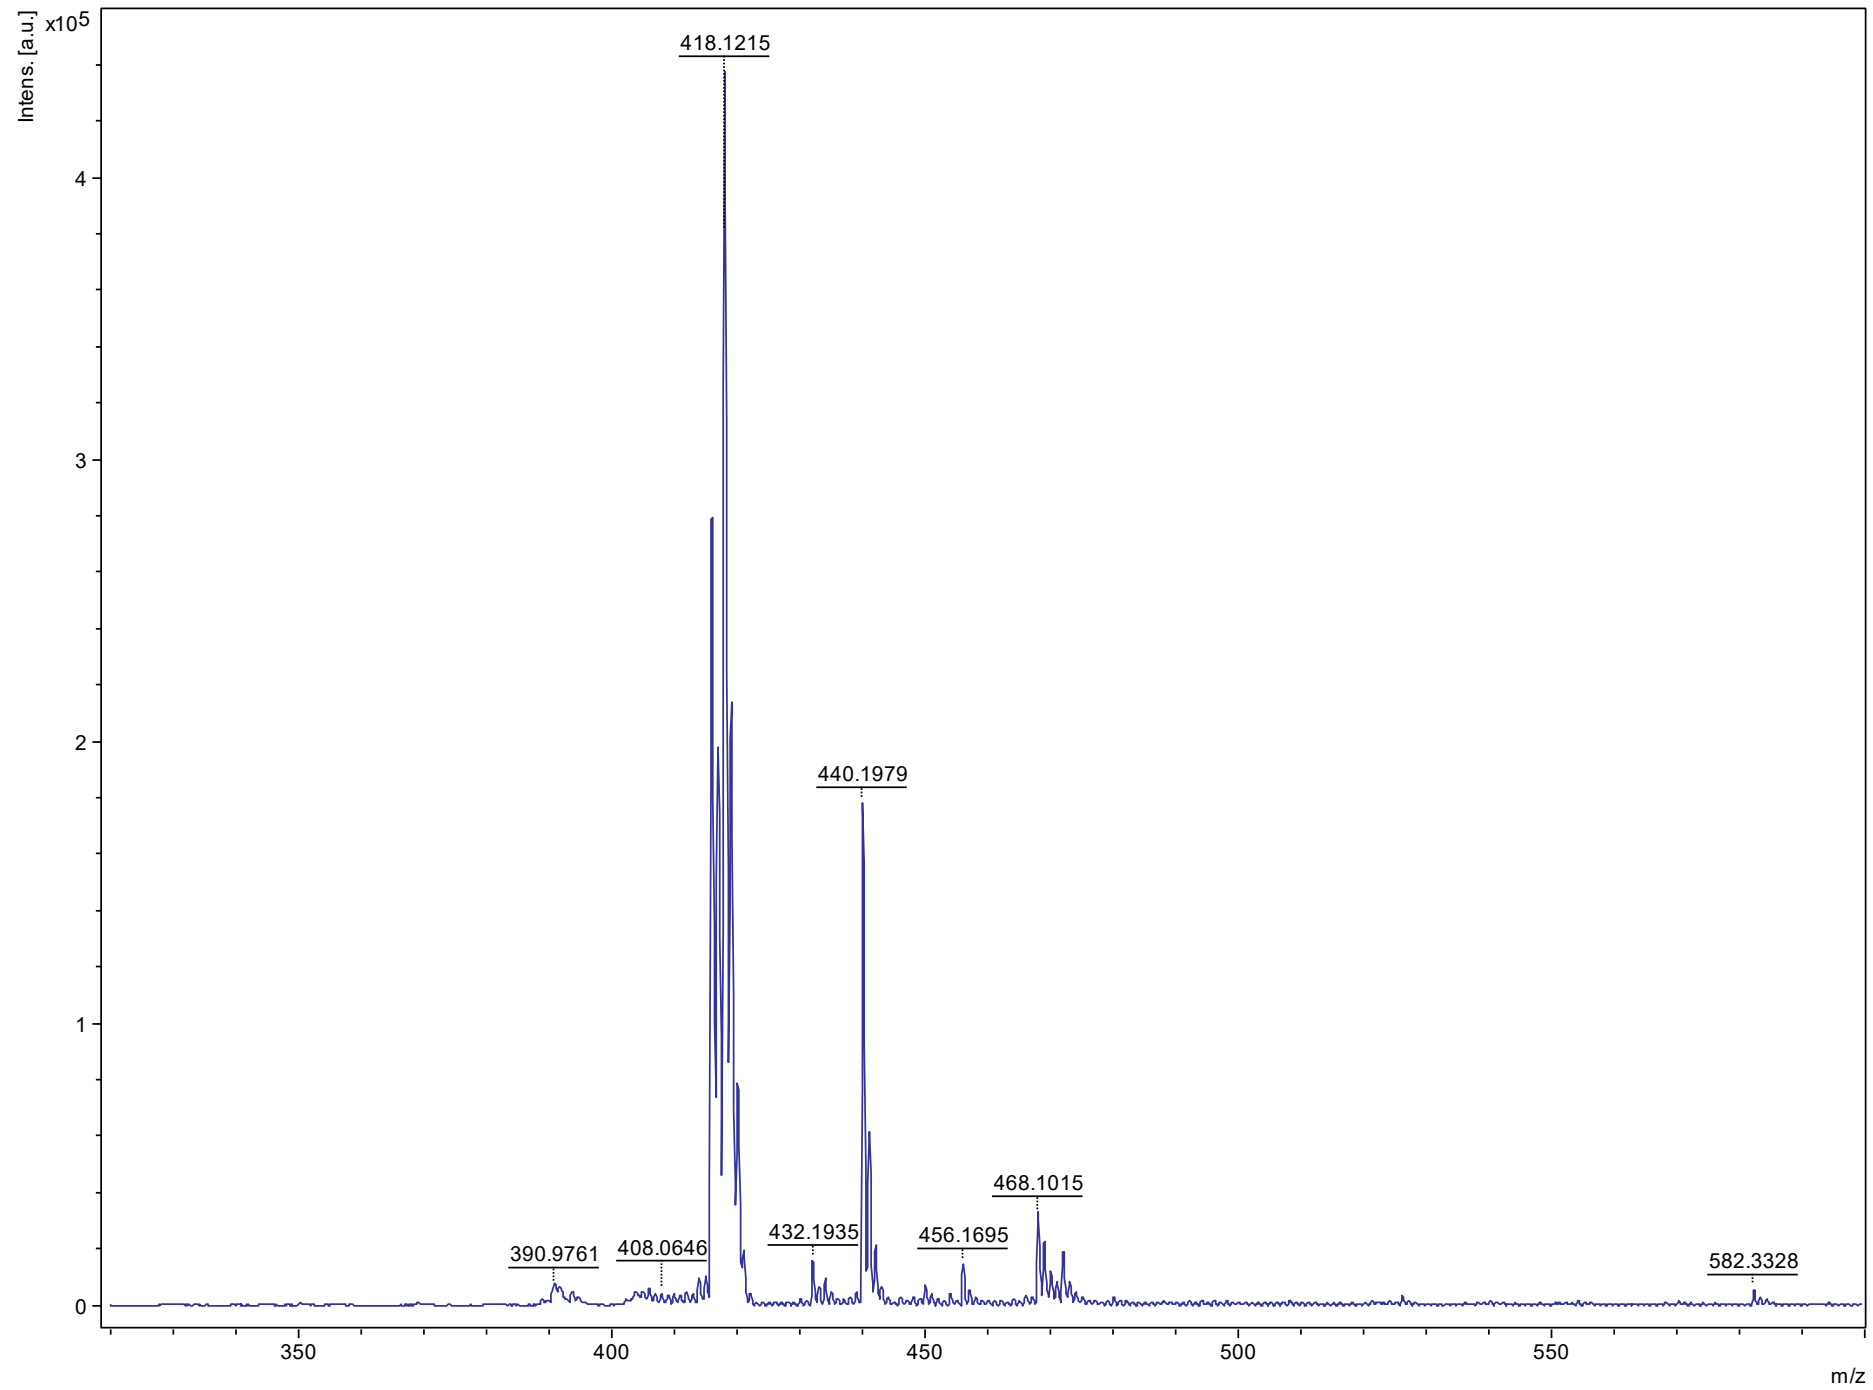

Sample Name: MAS 1-85

```

=====
Acq. Operator   : SYSTEM                      Seq. Line :    4
Acq. Instrument : 1220 HPLC                    Location  :   84
Injection Date  : 10/13/2022 11:36:02 AM      Inj       :    1
                                           Inj Volume: 70.000 µl
Different Inj Volume from Sample Entry! Actual Inj Volume : 50.000 µl
Method          : C:\Chem32\1\Data\luana 2022-10-13 10-13-01\Luana_small_molecule.M (Sequence
                :                               Method)
Last changed    : 10/13/2022 10:13:06 AM by SYSTEM
Method Info     : MeOH/water
    
```

Sample Info : MAS 1-85

Additional Info : Peak(s) manually integrated

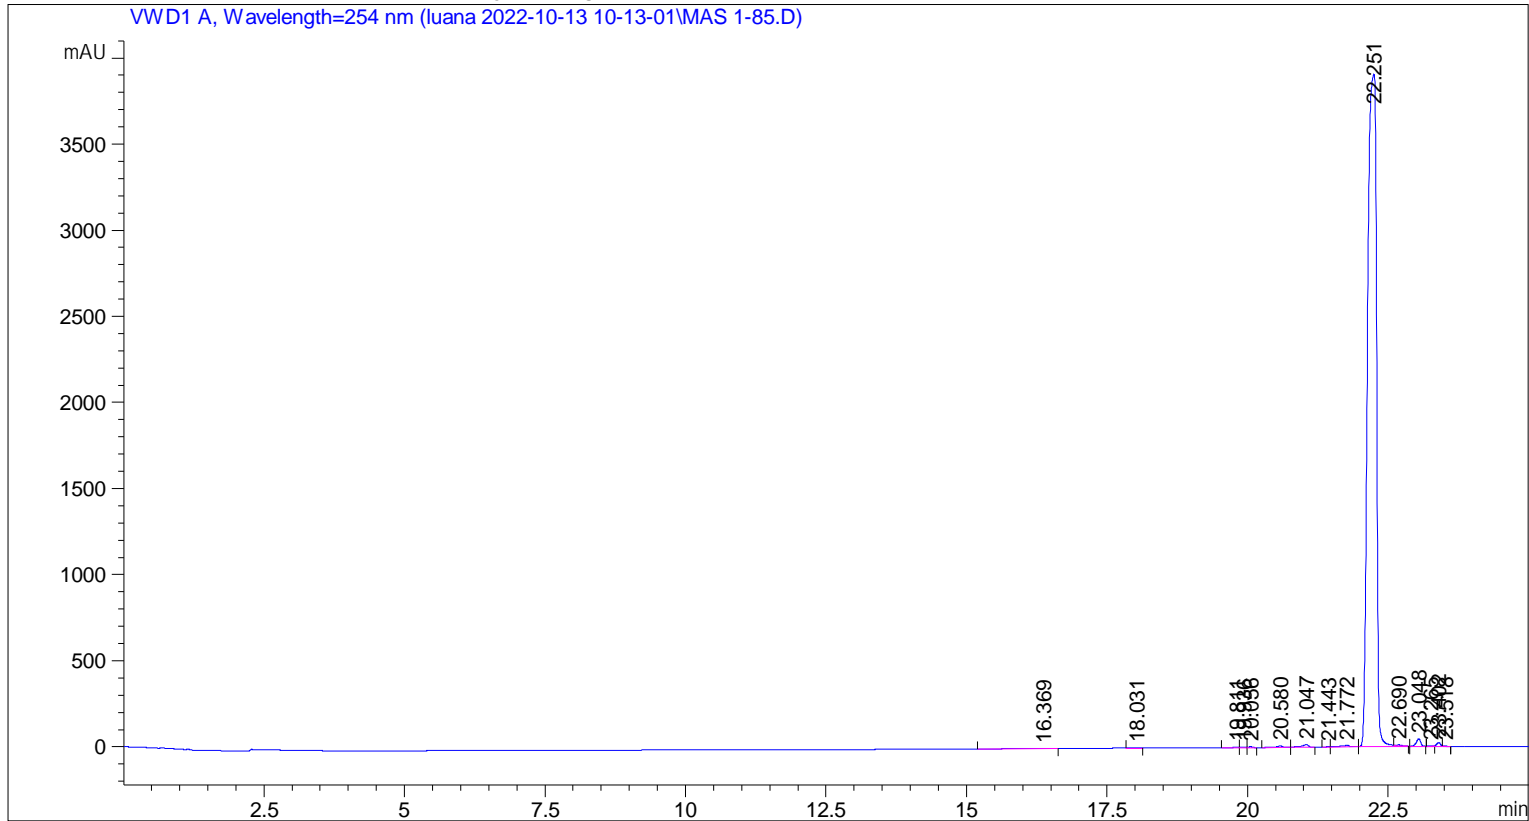

Area Percent Report

```

Sorted By      :      Signal
Multiplier     :      1.0000
Dilution       :      1.0000
Use Multiplier & Dilution Factor with ISTDs
    
```

Signal 1: VWD1 A, Wavelength=254 nm

| Peak # | RetTime [min] | Type | Width [min] | Area [mAU*s] | Height [mAU] | Area % |
|--------|---------------|------|-------------|--------------|--------------|--------|
| 1      | 16.369        | BB   | 0.4198      | 72.39281     | 2.36046      | 0.1680 |
| 2      | 18.031        | VV   | 0.1560      | 31.03286     | 2.72306      | 0.0720 |
| 3      | 19.811        | BV   | 0.1085      | 19.94106     | 2.59890      | 0.0463 |
| 4      | 19.936        | VV   | 0.0891      | 24.77004     | 3.95412      | 0.0575 |



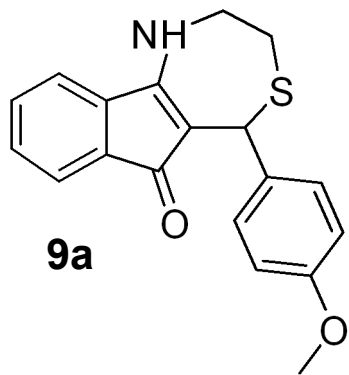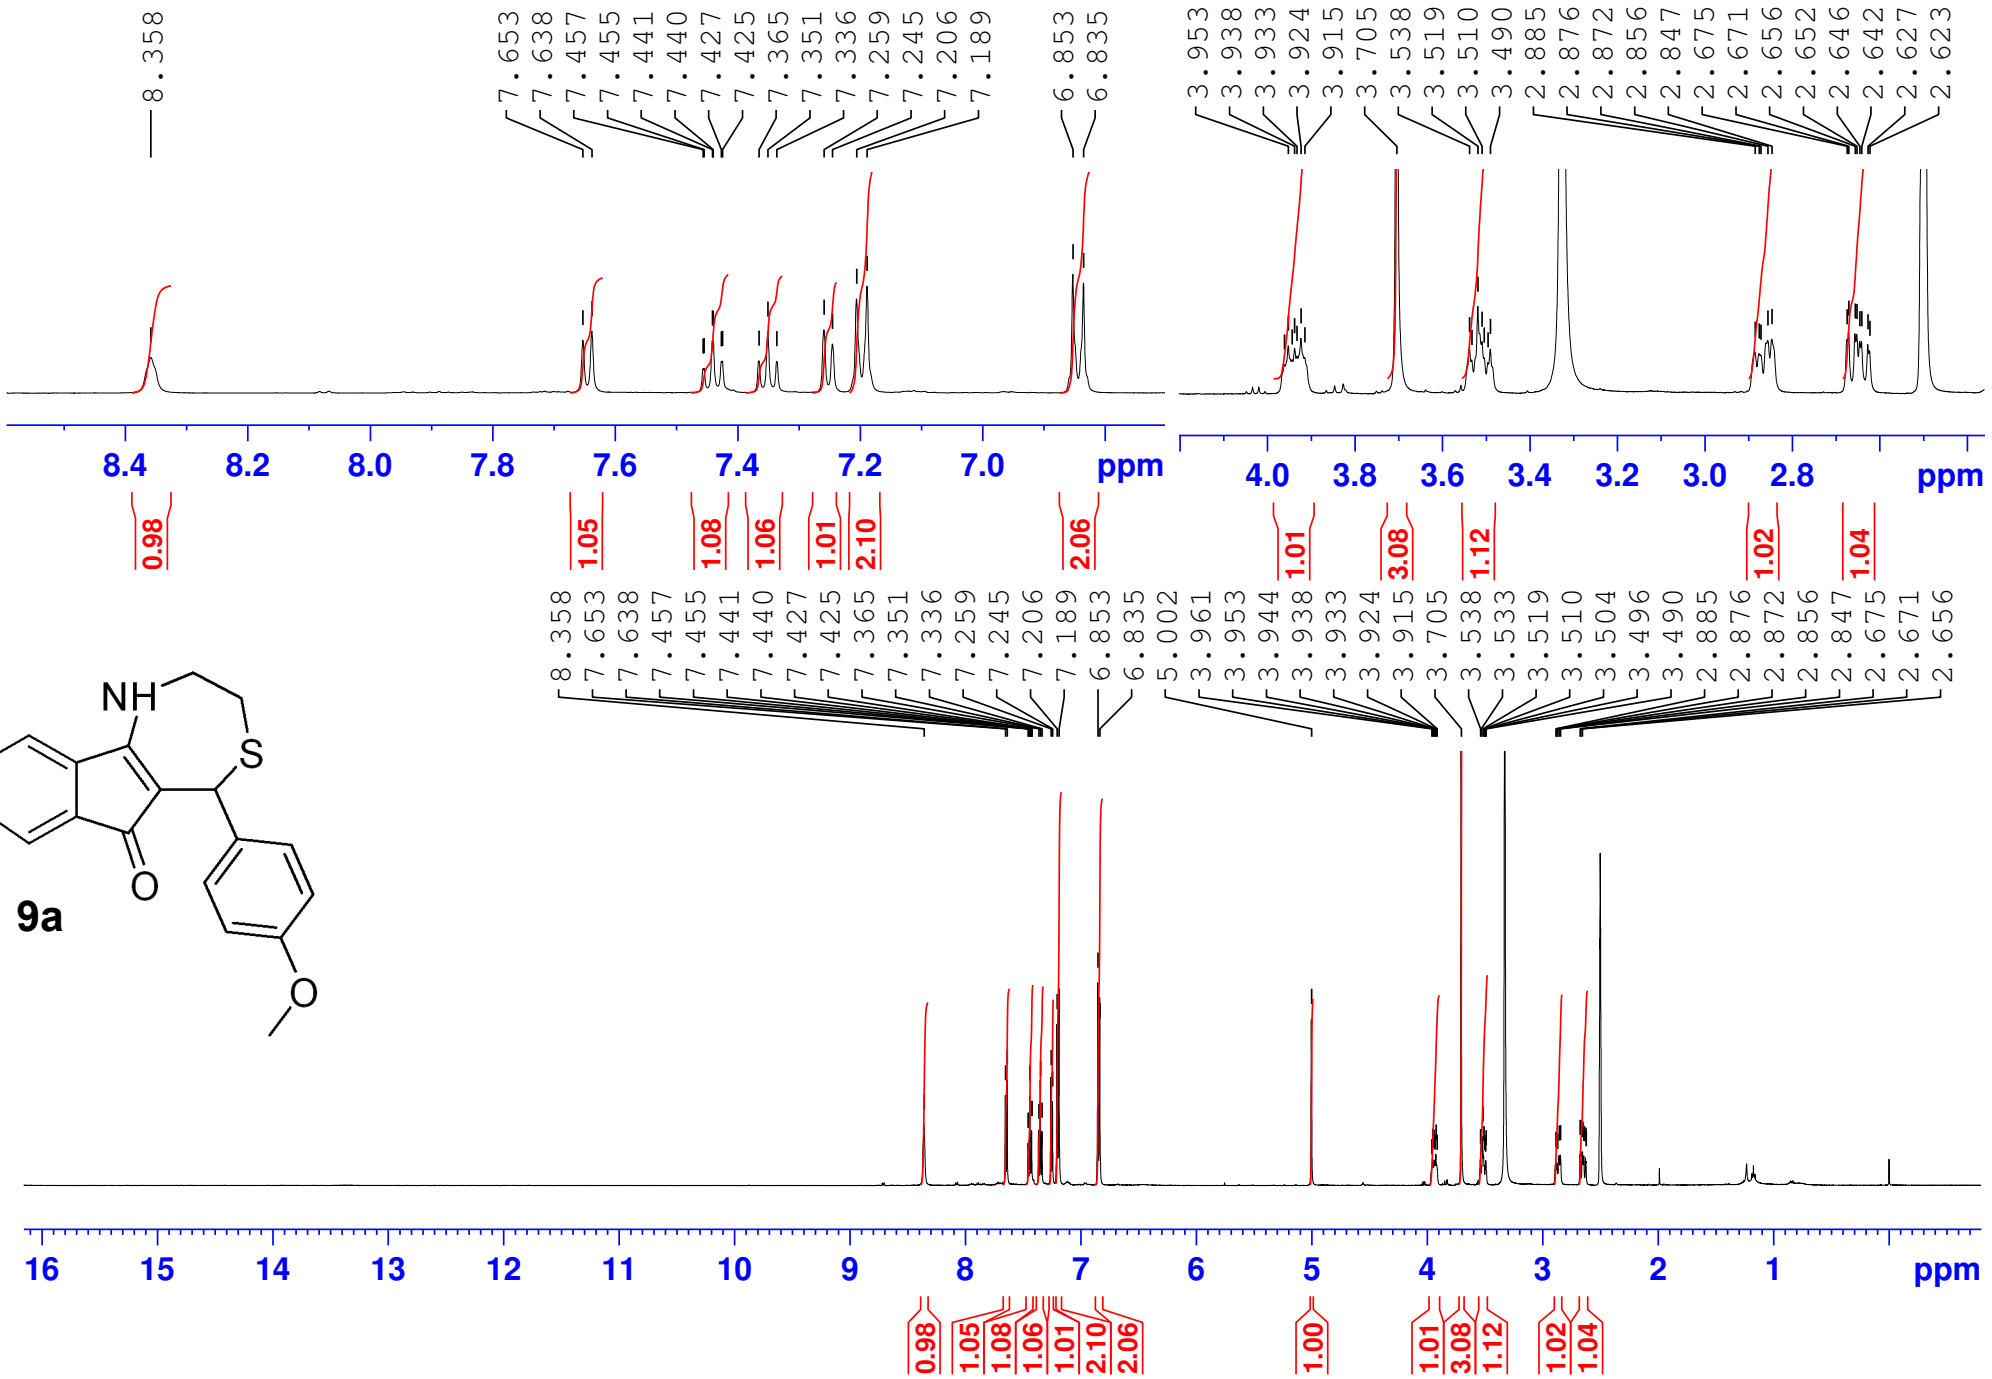

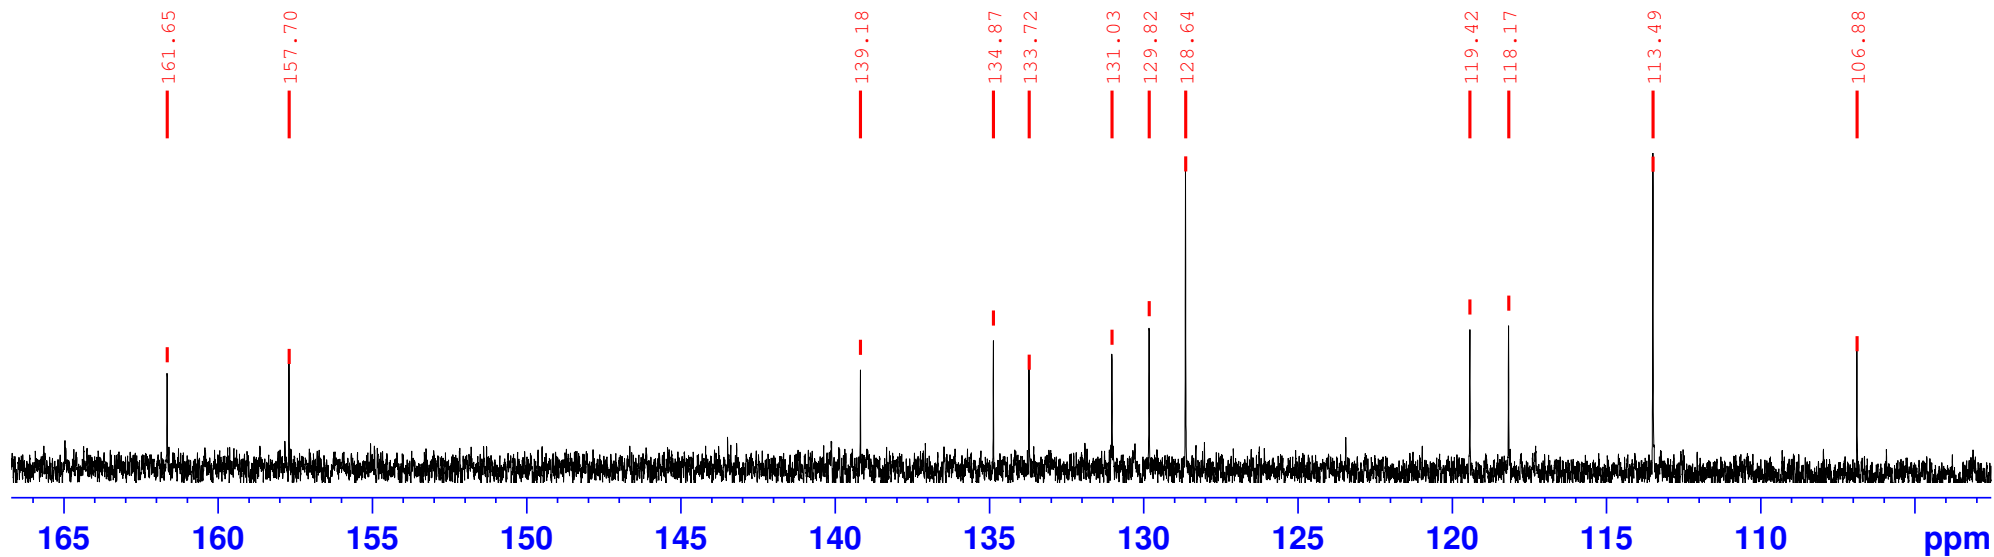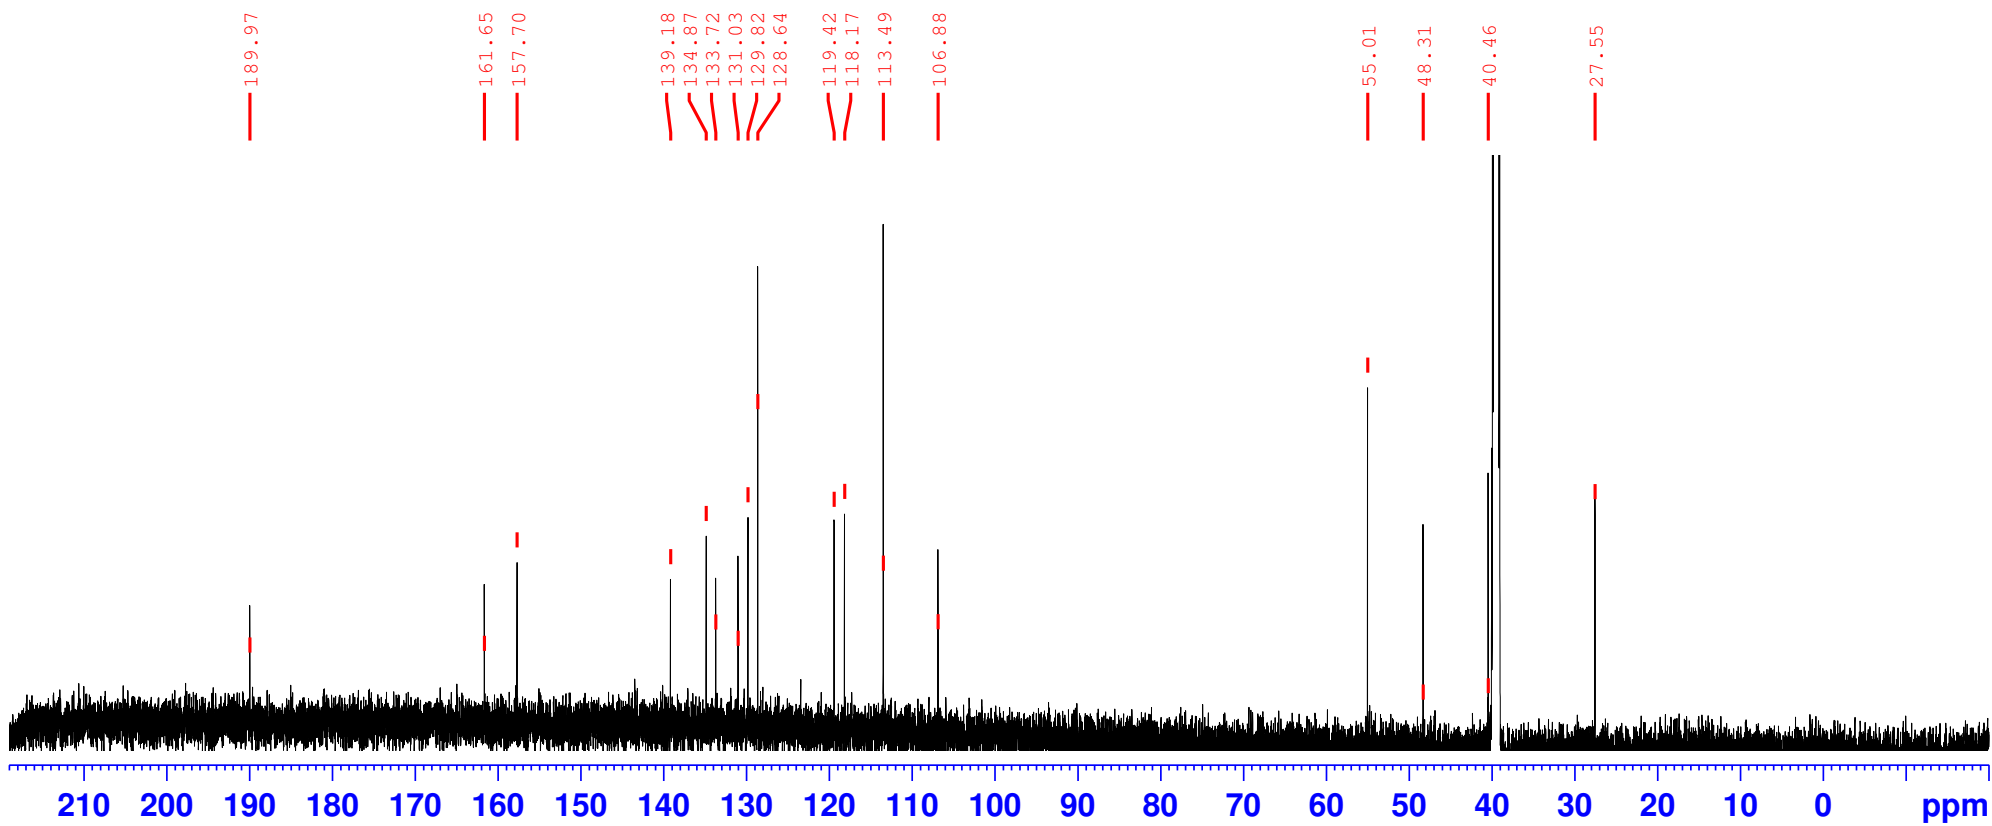



# User Spectrum Plot Report

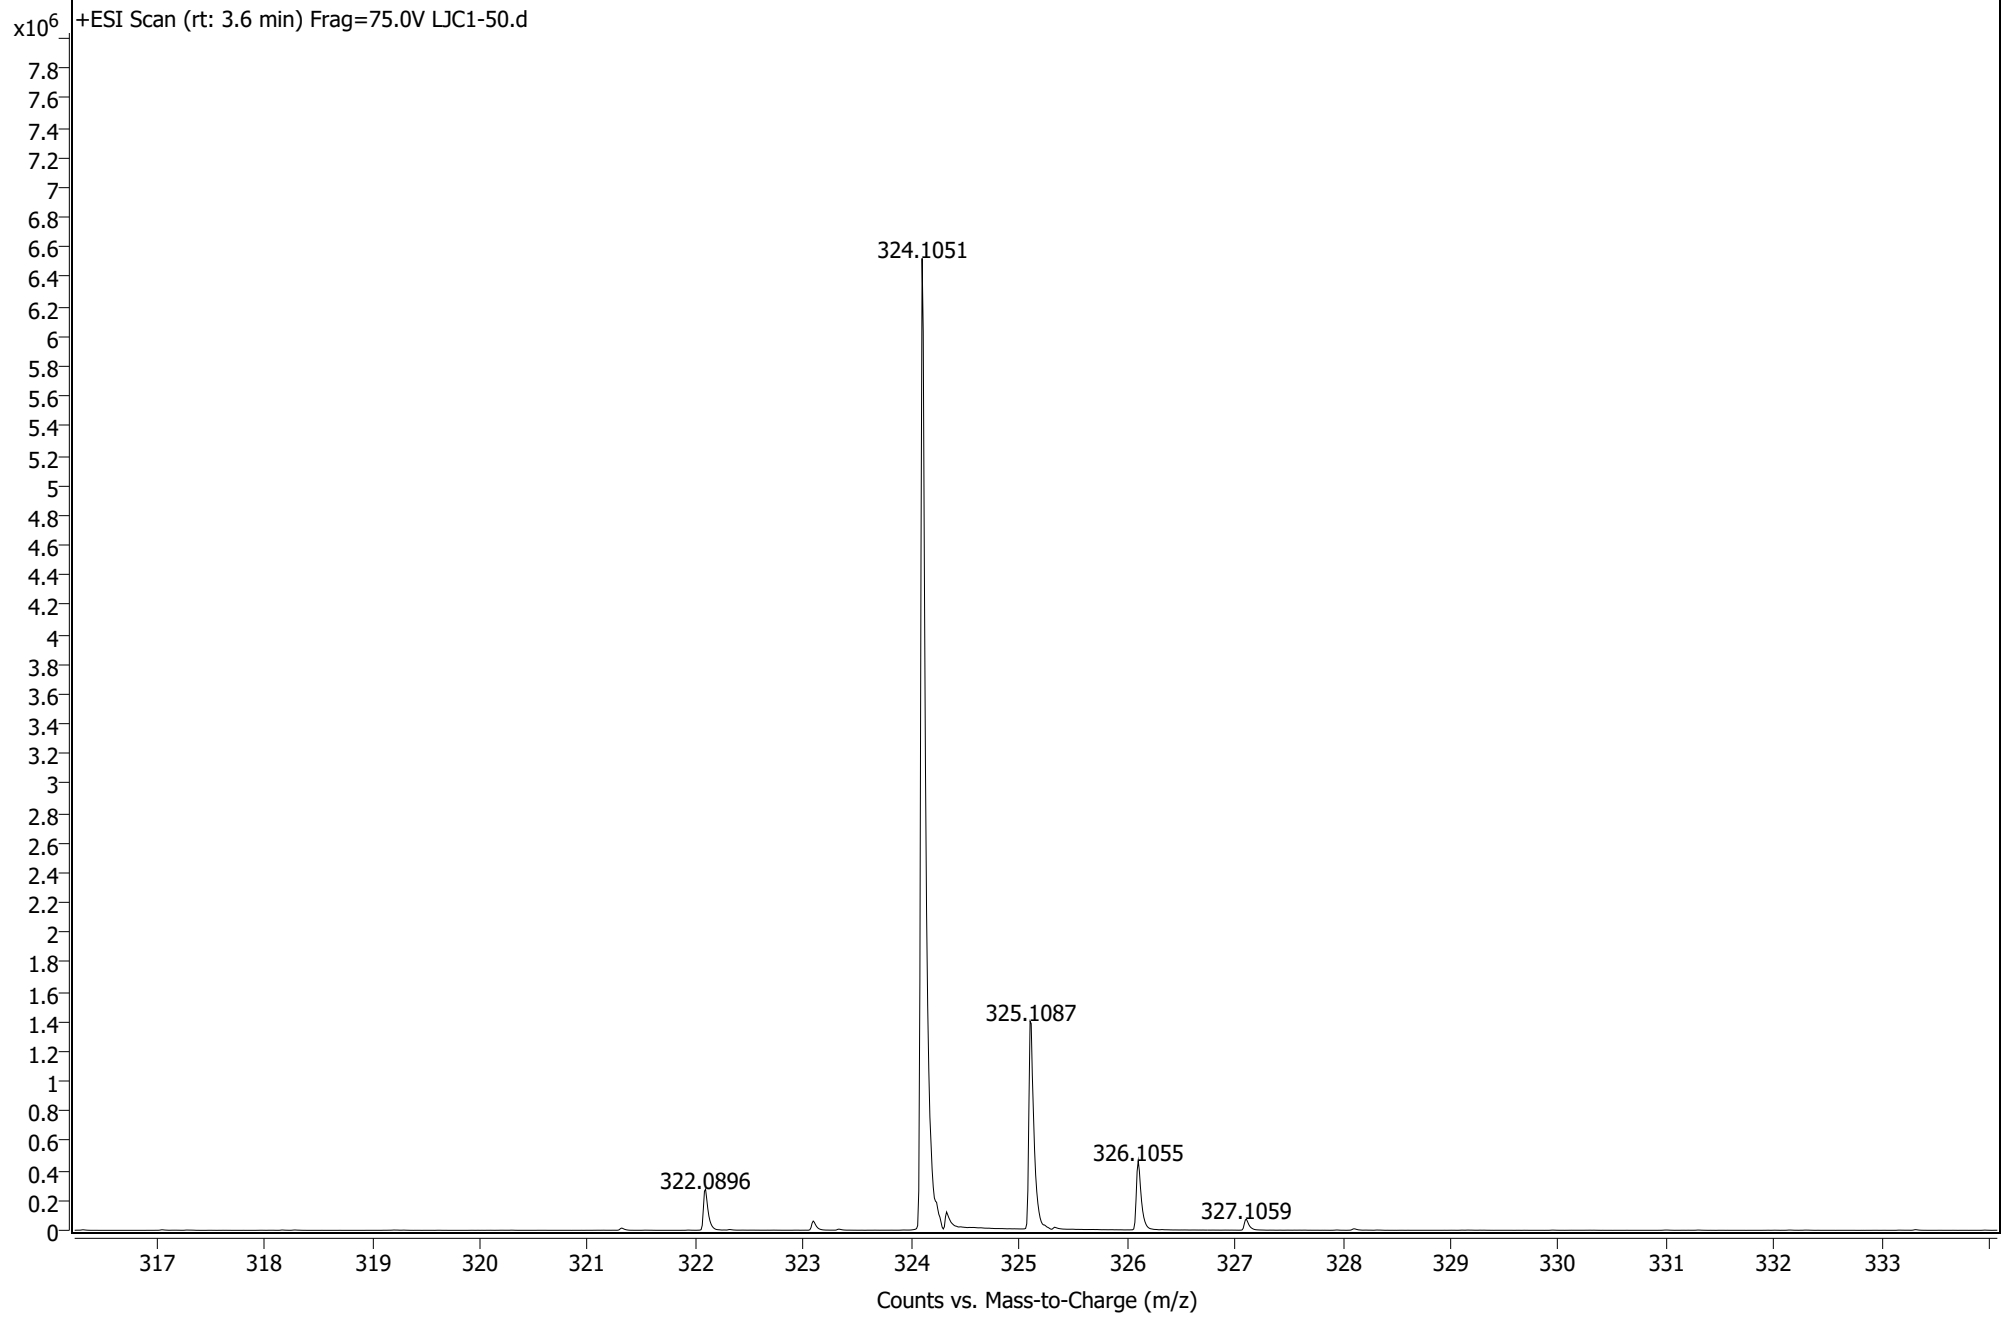

Sample Name: LJC1-50

```

=====
Acq. Operator   : SYSTEM                      Seq. Line :    6
Acq. Instrument : 1220 HPLC                   Location  :   45
Injection Date  : 8/14/2020 5:08:11 PM      Inj       :    1
                                           Inj Volume: 50.000 µl

Method          : C:\Chem32\1\Data\luana 2020-08-14 14-48-41\MOHAMED-SMALL MOLECULE.M (
                  Sequence Method)
Last changed    : 8/14/2020 2:48:44 PM by SYSTEM
Sample Info     : LJC1-50
    
```

Additional Info : Peak(s) manually integrated

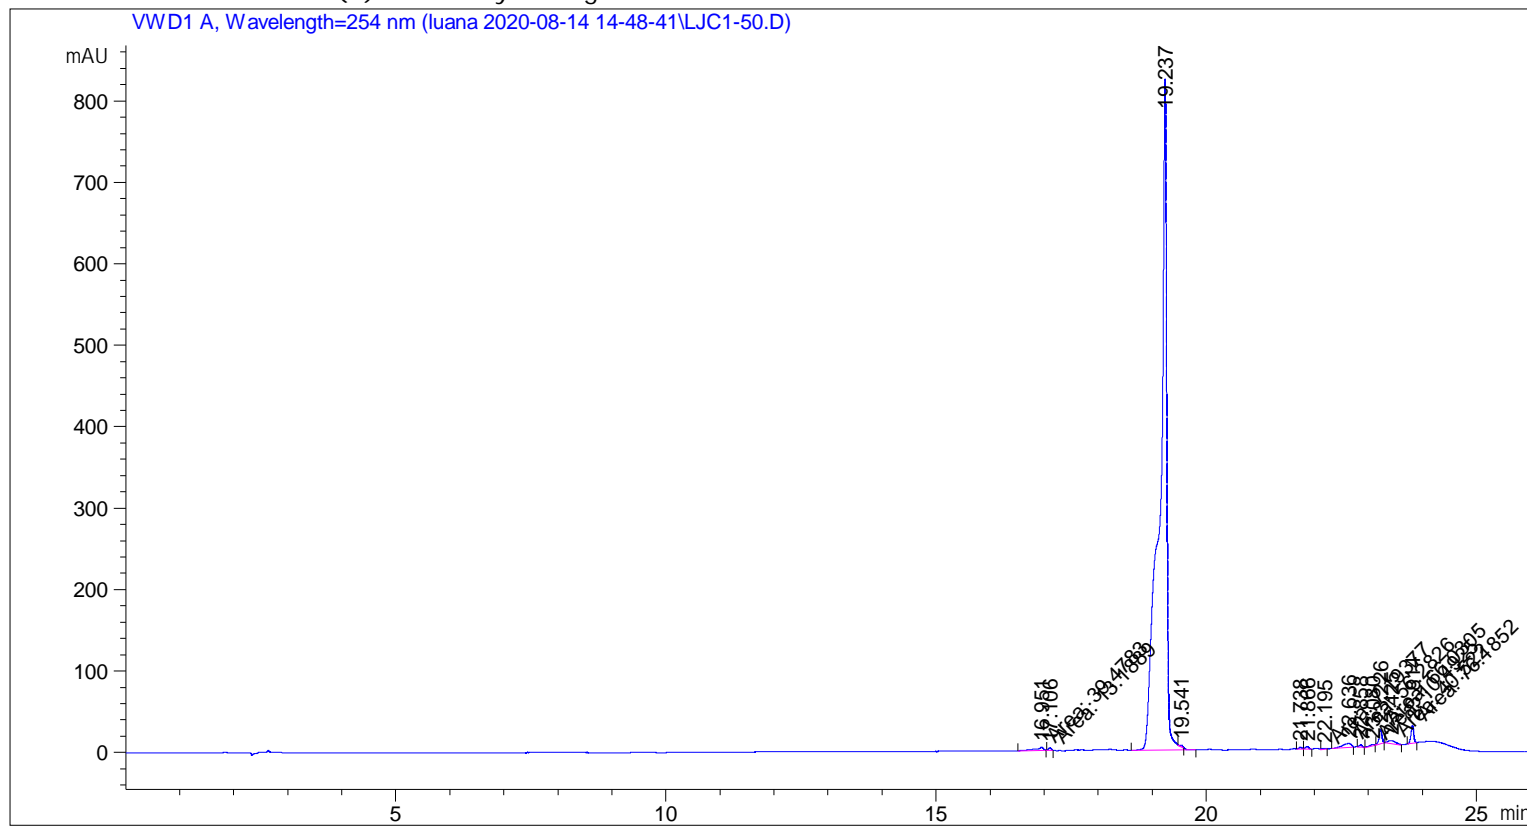

=====  
 Area Percent Report  
 =====

```

Sorted By      :      Signal
Multiplier     :      1.0000
Dilution       :      1.0000
Use Multiplier & Dilution Factor with ISTDs
    
```

Signal 1: VWD1 A, Wavelength=254 nm

| Peak # | RetTime [min] | Type | Width [min] | Area [mAU*s] | Height [mAU] | Area %  |
|--------|---------------|------|-------------|--------------|--------------|---------|
| 1      | 16.951        | MM   | 0.1586      | 39.47832     | 4.14796      | 0.5122  |
| 2      | 17.106        | MM   | 0.0707      | 13.18885     | 3.10871      | 0.1711  |
| 3      | 19.237        | BV R | 0.1191      | 7356.73584   | 824.14886    | 95.4403 |
| 4      | 19.541        | VB E | 0.0512      | 6.97107      | 2.15795      | 0.0904  |
| 5      | 21.738        | VV   | 0.0649      | 10.06187     | 2.26236      | 0.1305  |
| 6      | 21.866        | VB   | 0.0665      | 14.03131     | 3.08971      | 0.1820  |
| 7      | 22.195        | MM   | 0.0709      | 7.19377      | 1.22277      | 0.0933  |



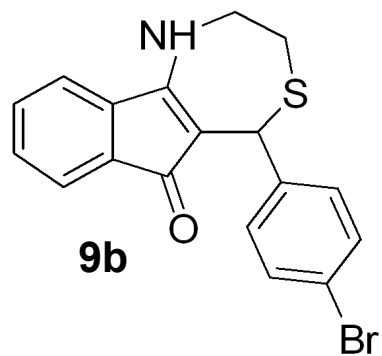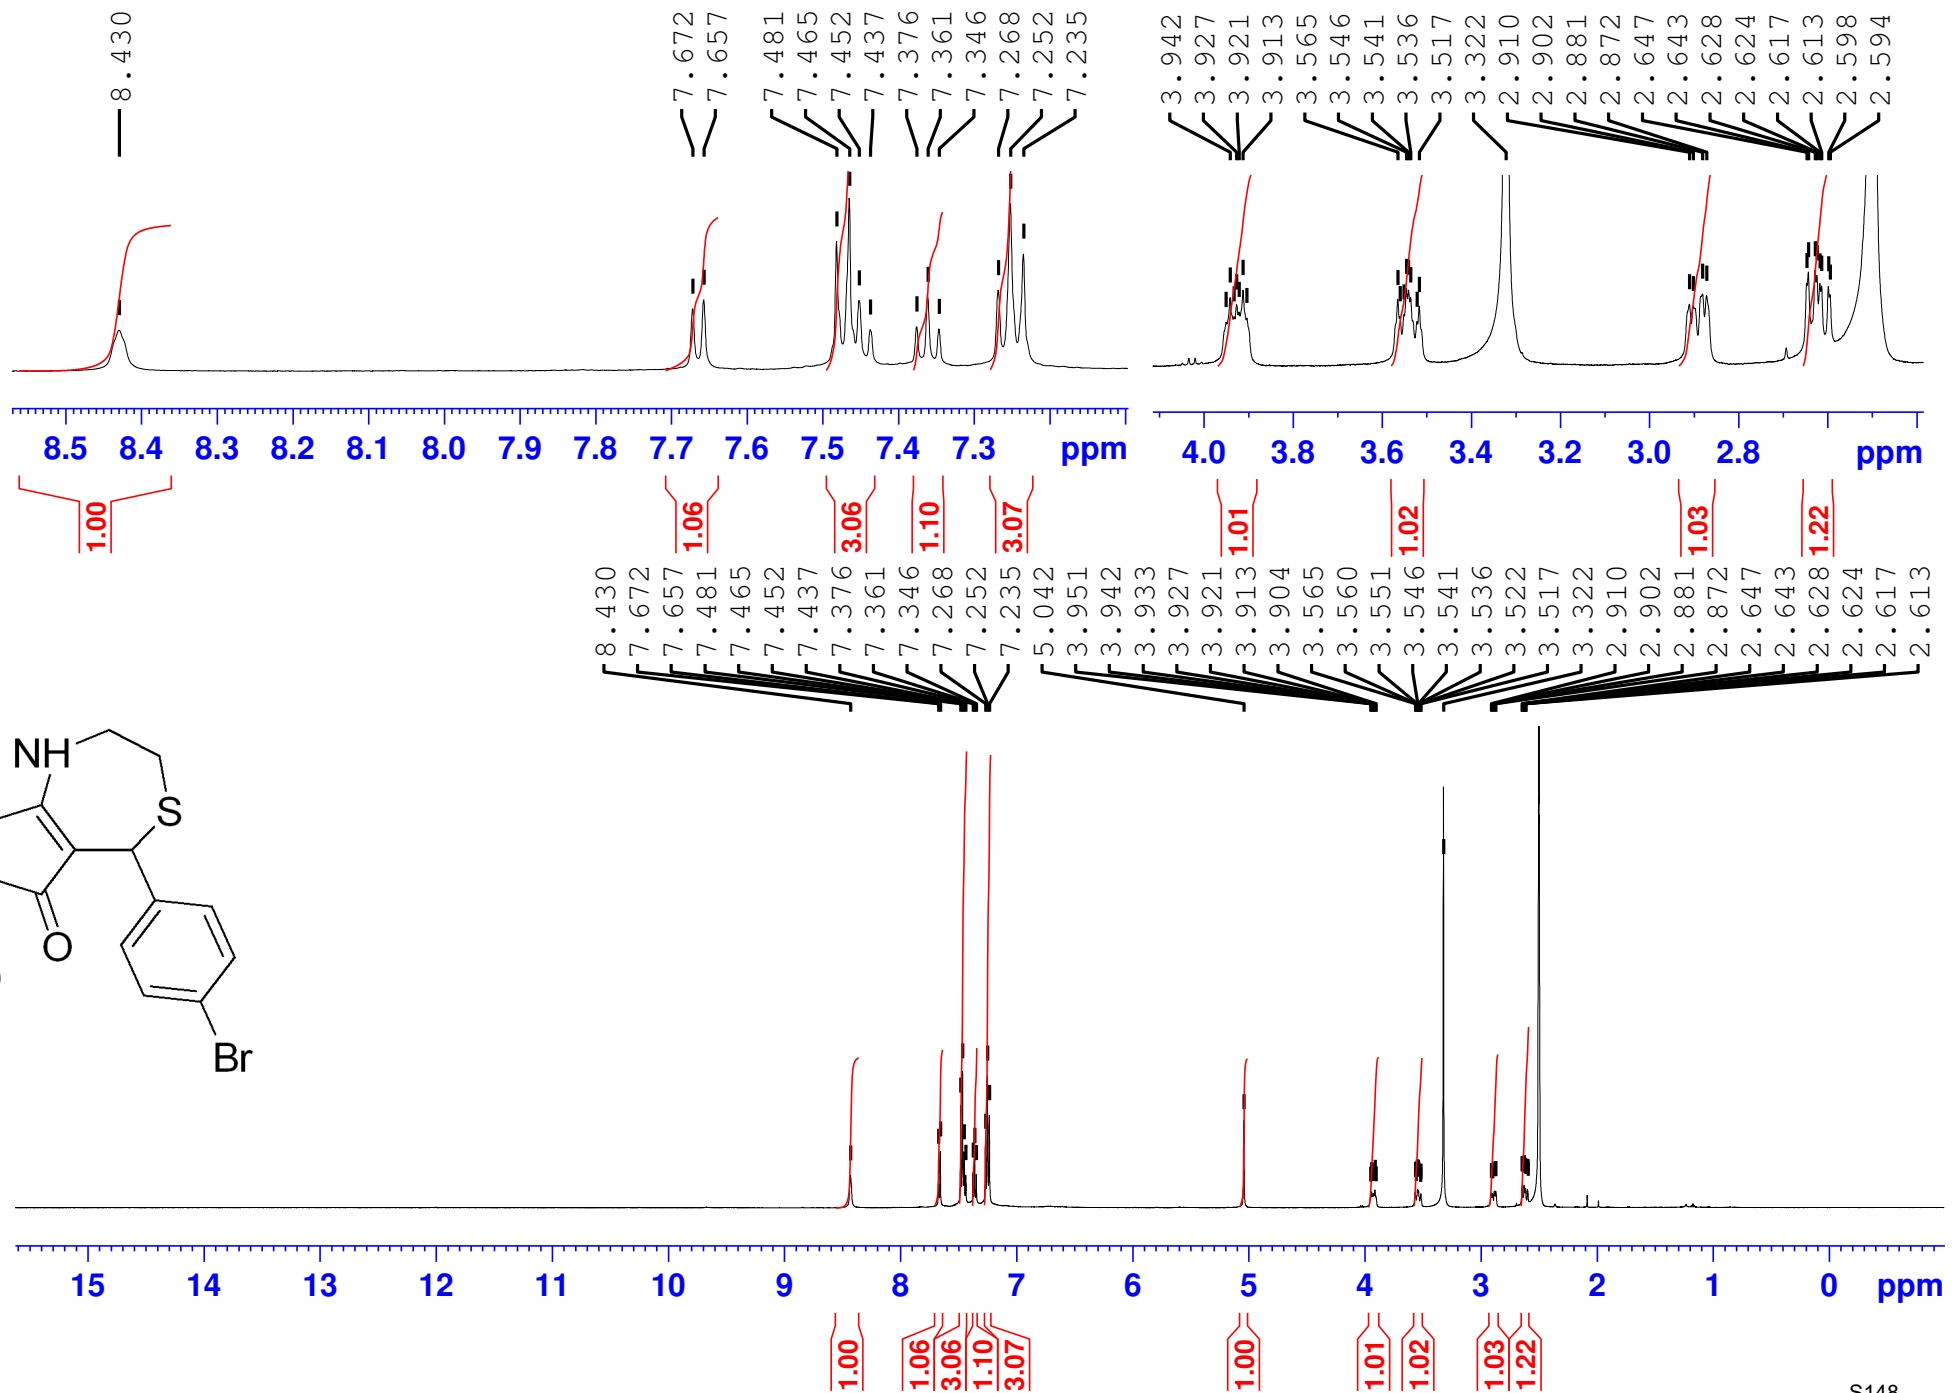

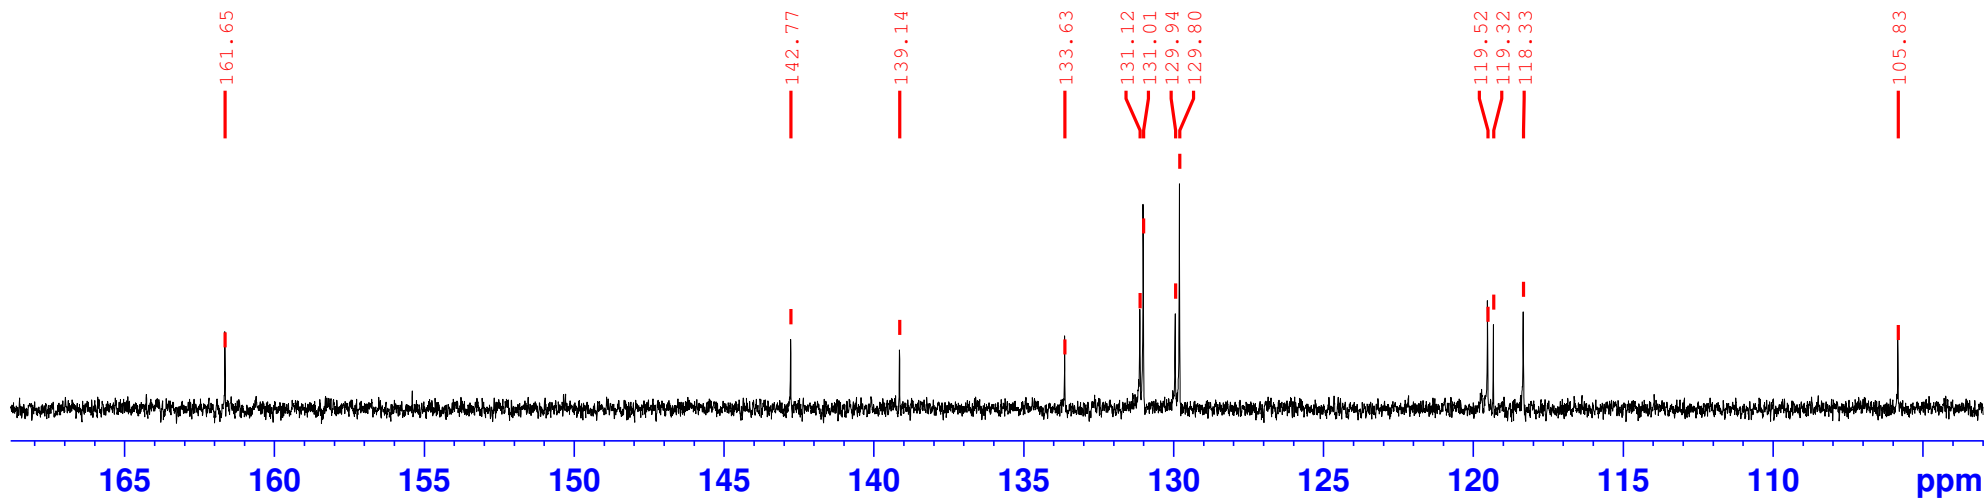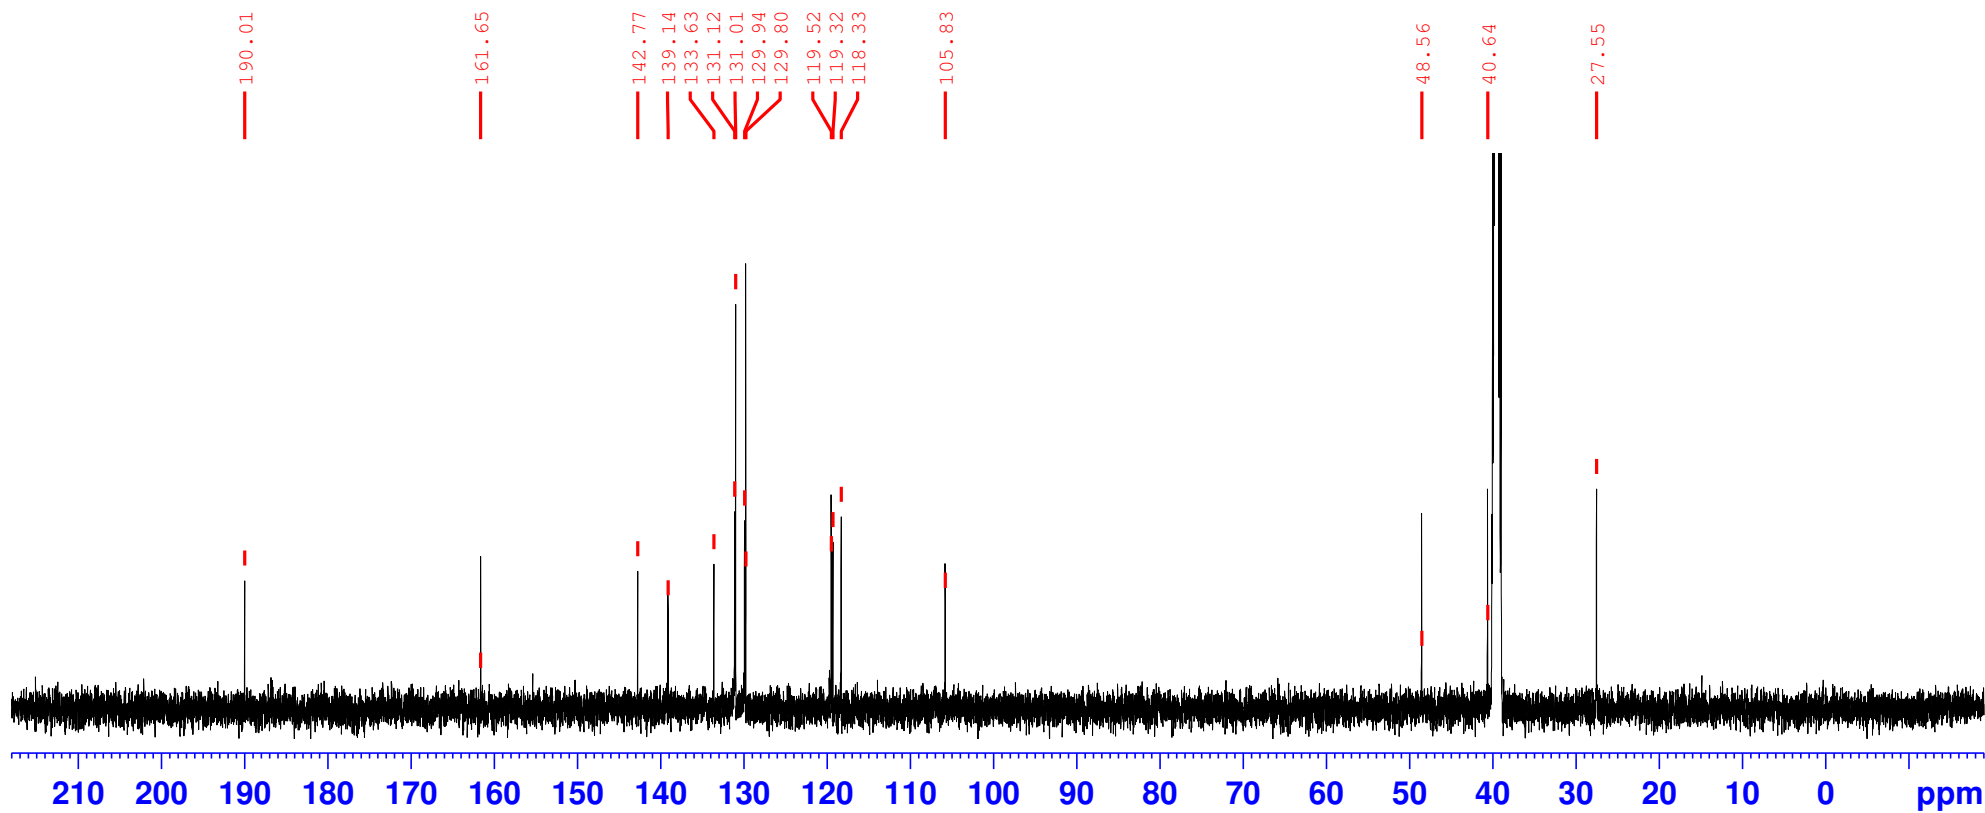

# User Spectrum Plot Report

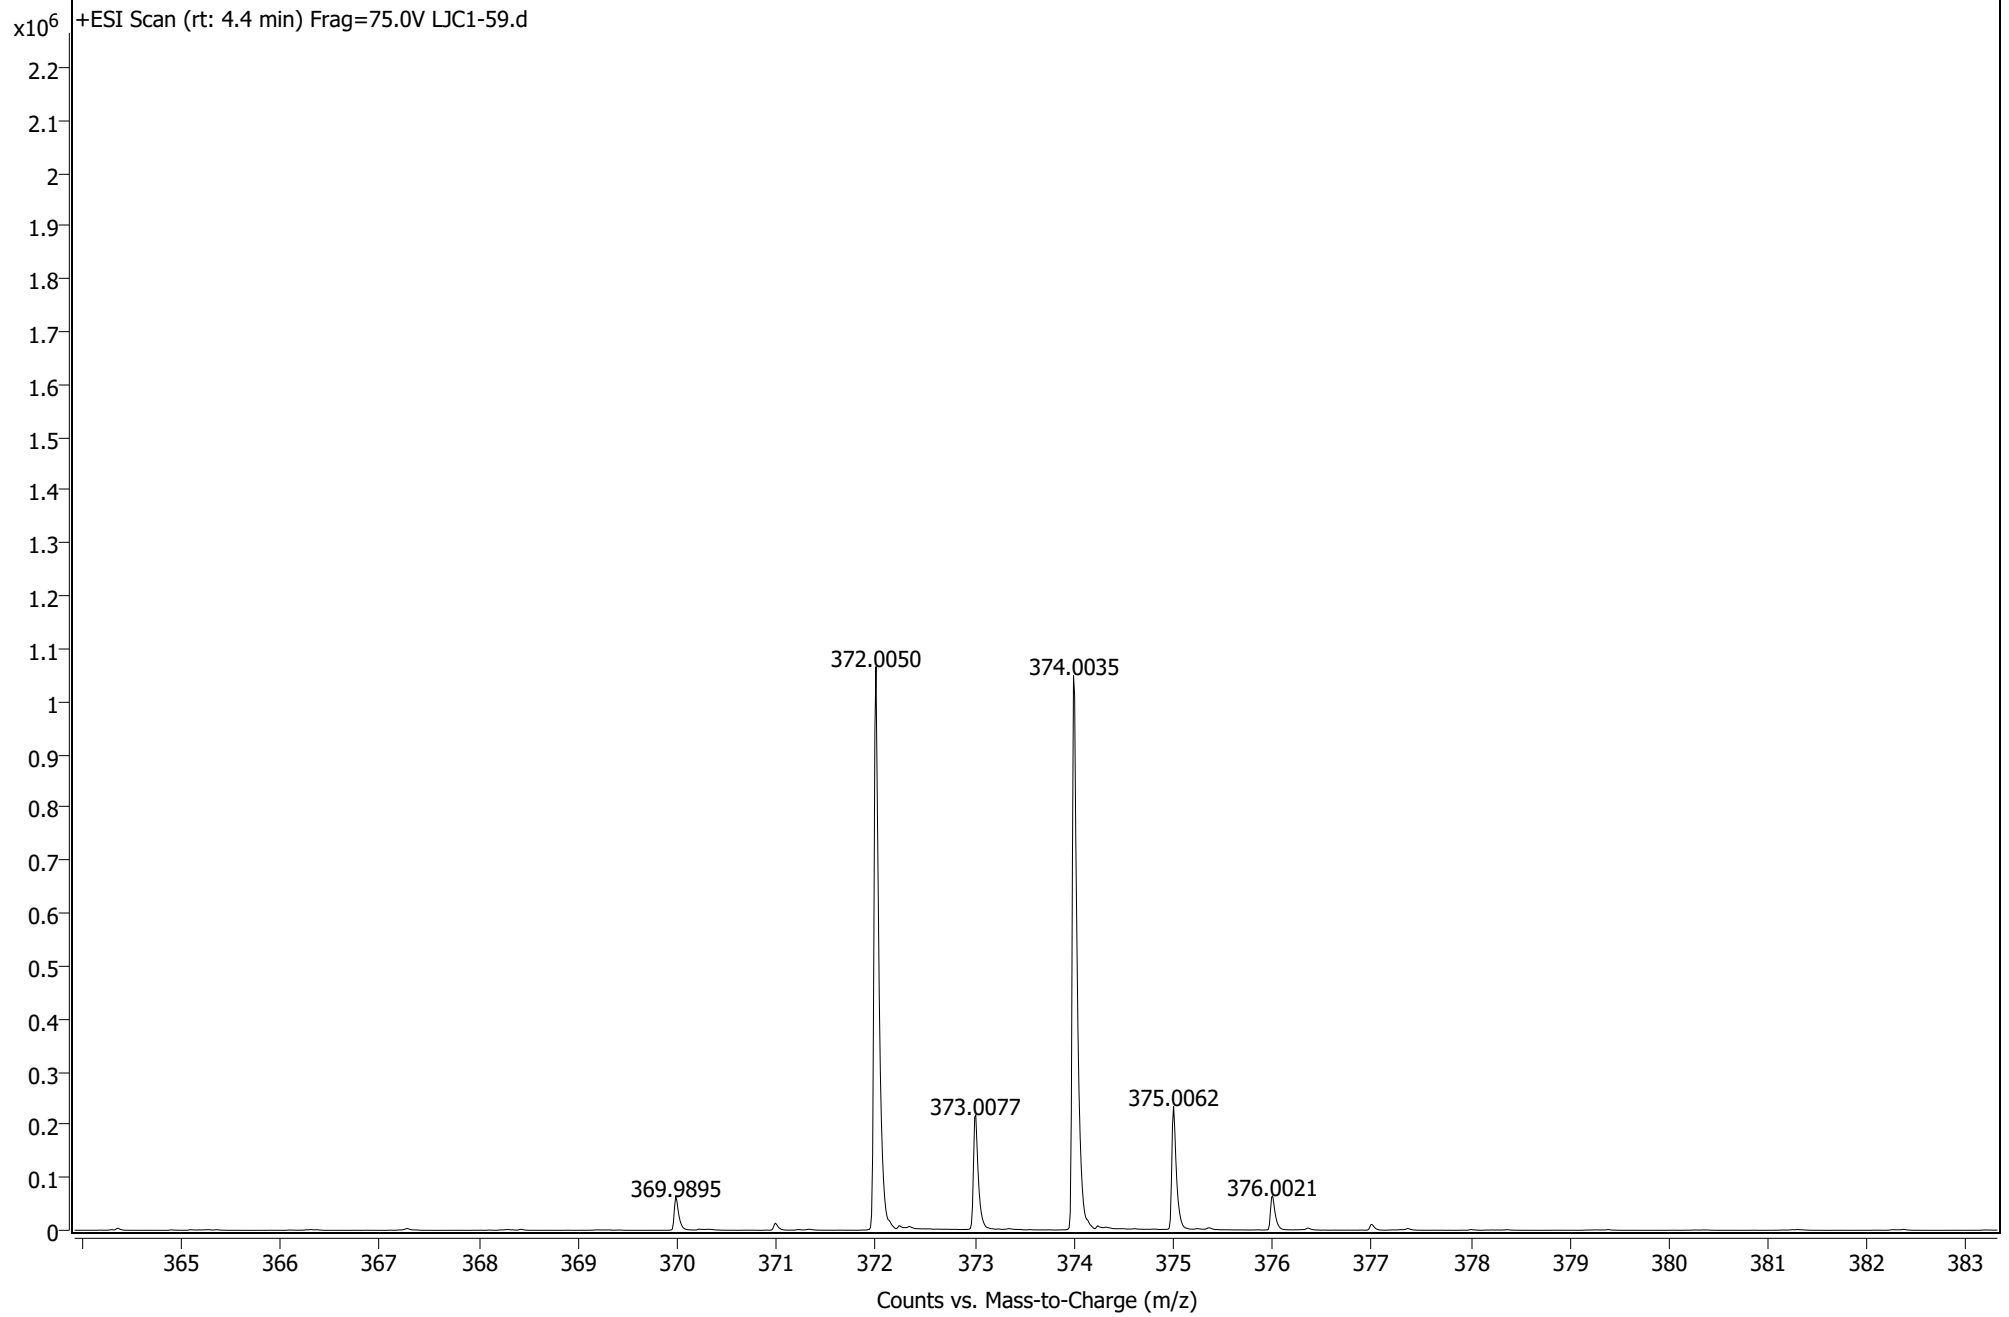

Sample Name: LJC 1-59 (REP)

```

=====
Acq. Operator   : SYSTEM                      Seq. Line :    8
Acq. Instrument : 1220 HPLC                    Location  :   72
Injection Date  : 9/2/2021 12:33:01 PM       Inj       :    1
                                           Inj Volume: 50.000 µl
Method          : C:\Chem32\1\Data\luana 2021-09-02 09-40-26\Luana_small_molecule.M (Sequence Method)
Last changed    : 9/2/2021 10:25:25 AM by SYSTEM
Method Info     : MeOH/water

Sample Info     : LJC 1-59 (REP)
    
```

Additional Info : Peak(s) manually integrated

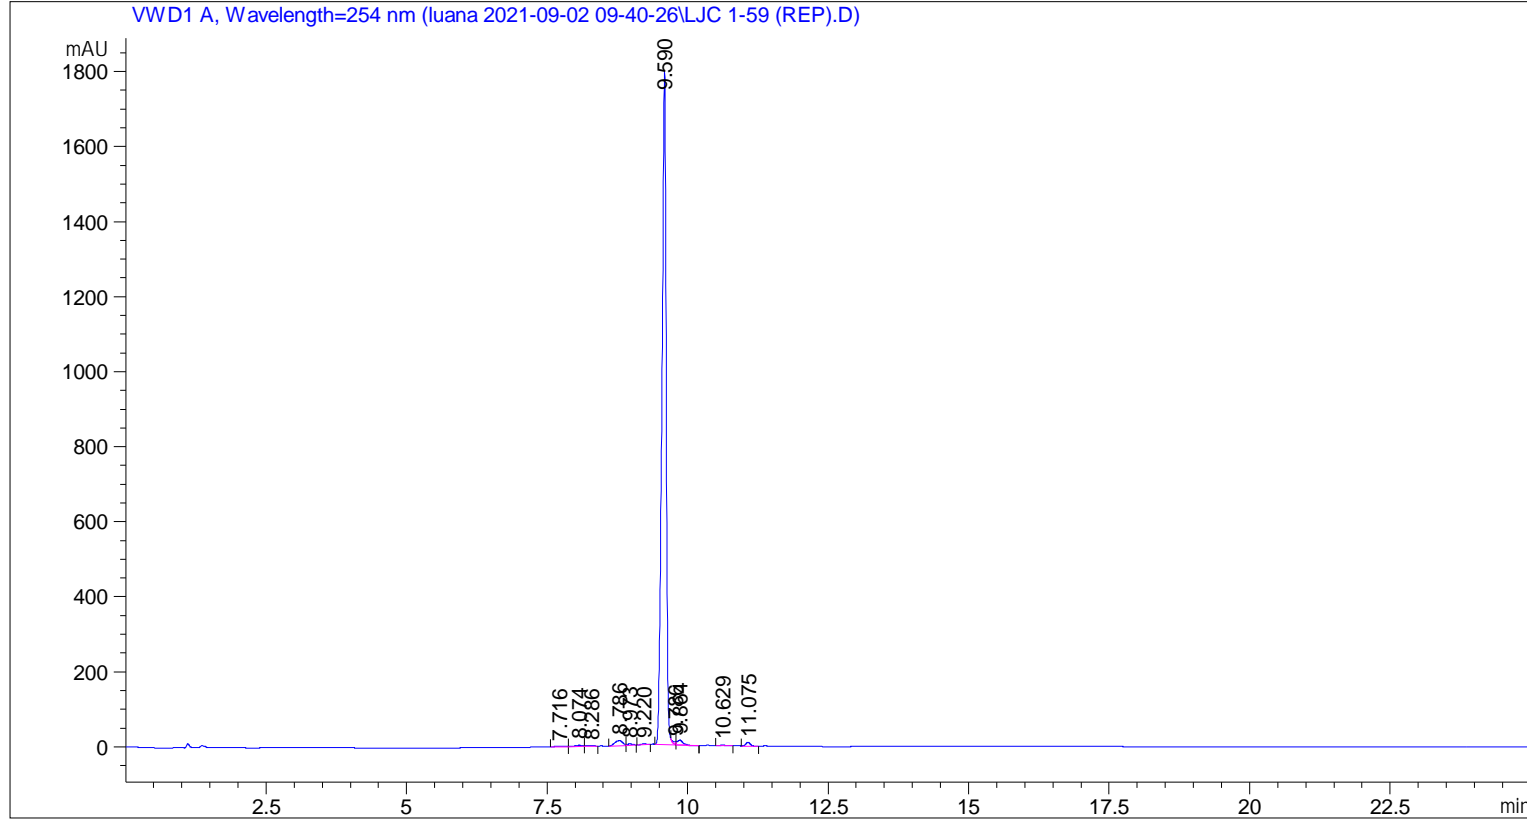

Area Percent Report

```

Sorted By      :      Signal
Multiplier     :      1.0000
Dilution       :      1.0000
Use Multiplier & Dilution Factor with ISTDs
    
```

Signal 1: VWD1 A, Wavelength=254 nm

| Peak # | RetTime [min] | Type | Width [min] | Area [mAU*s] | Height [mAU] | Area % |
|--------|---------------|------|-------------|--------------|--------------|--------|
| 1      | 7.716         | BV   | 0.1854      | 24.60387     | 1.93446      | 0.2465 |
| 2      | 8.074         | VV   | 0.1478      | 35.60102     | 3.40983      | 0.3567 |
| 3      | 8.286         | VV   | 0.1514      | 21.95141     | 1.96416      | 0.2199 |
| 4      | 8.786         | BV   | 0.1595      | 133.35028    | 13.59041     | 1.3360 |
| 5      | 8.973         | VB   | 0.0948      | 29.69850     | 4.34042      | 0.2975 |

| Peak # | RetTime [min] | Type | Width [min] | Area [mAU*s] | Height [mAU] | Area %  |
|--------|---------------|------|-------------|--------------|--------------|---------|
| 6      | 9.220         | BV   | 0.0961      | 19.68749     | 2.83234      | 0.1972  |
| 7      | 9.590         | BV R | 0.0760      | 9528.49805   | 1794.37732   | 95.4608 |
| 8      | 9.786         | VV E | 0.0462      | 25.50038     | 7.78751      | 0.2555  |
| 9      | 9.864         | VB E | 0.1006      | 93.23138     | 13.16180     | 0.9340  |
| 10     | 10.629        | VV   | 0.1326      | 16.81372     | 1.94994      | 0.1684  |
| 11     | 11.075        | BB   | 0.0778      | 52.65031     | 10.27224     | 0.5275  |

Totals : 9981.58639 1855.62043

=====  
\*\*\* End of Report \*\*\*



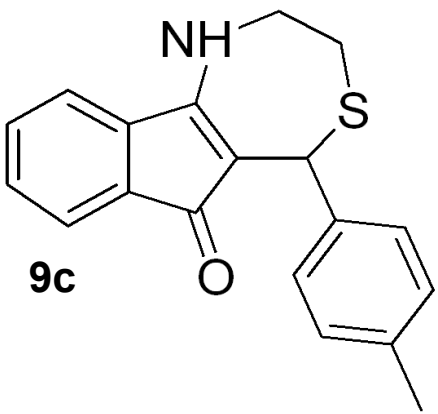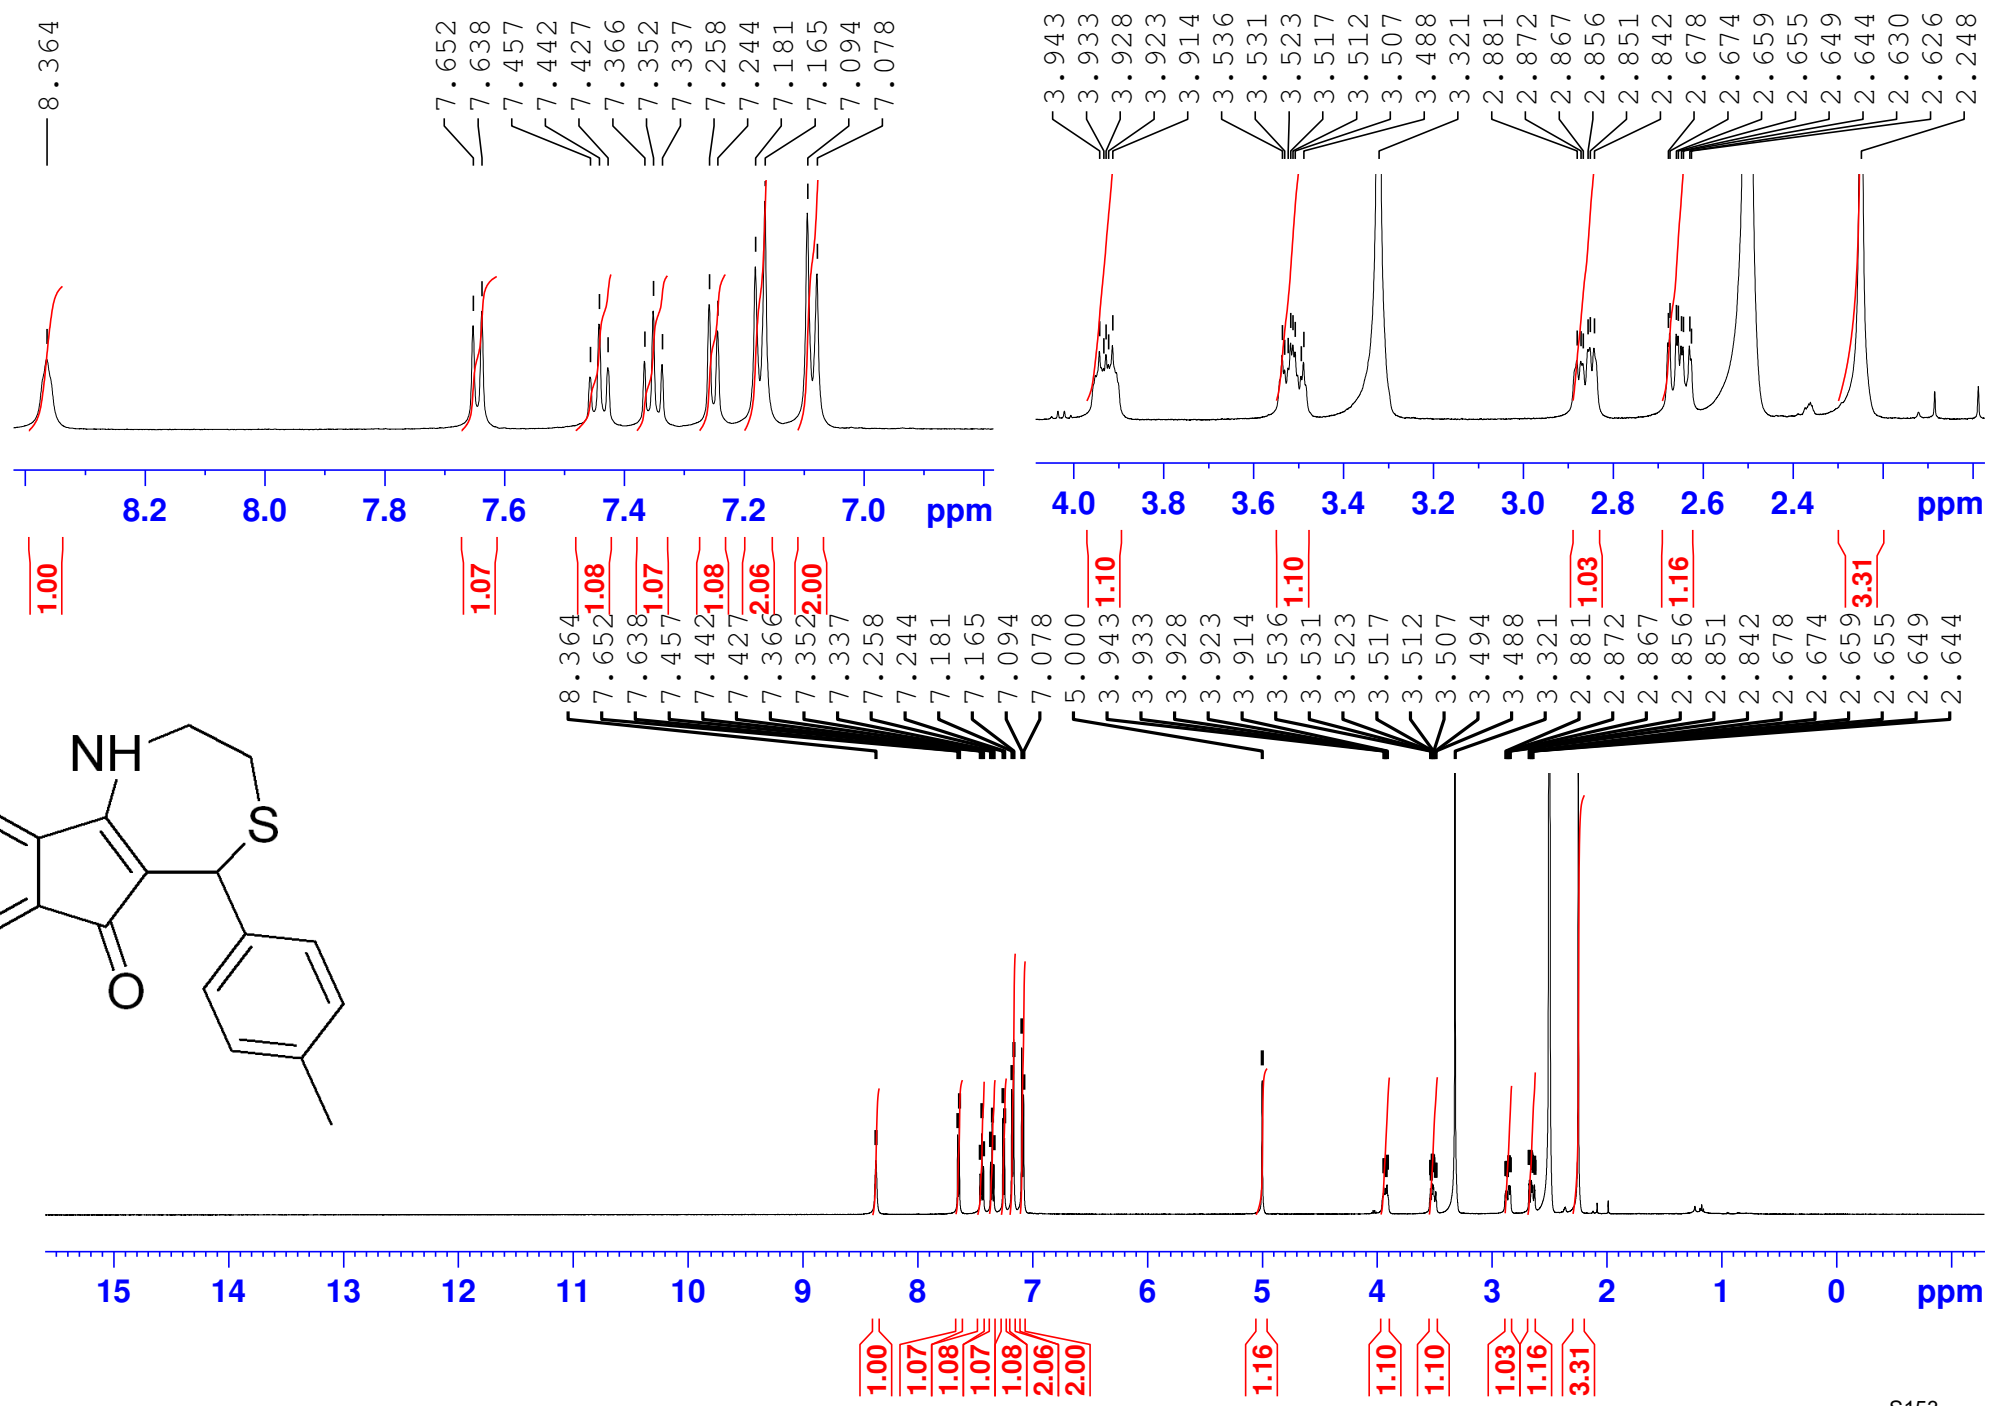

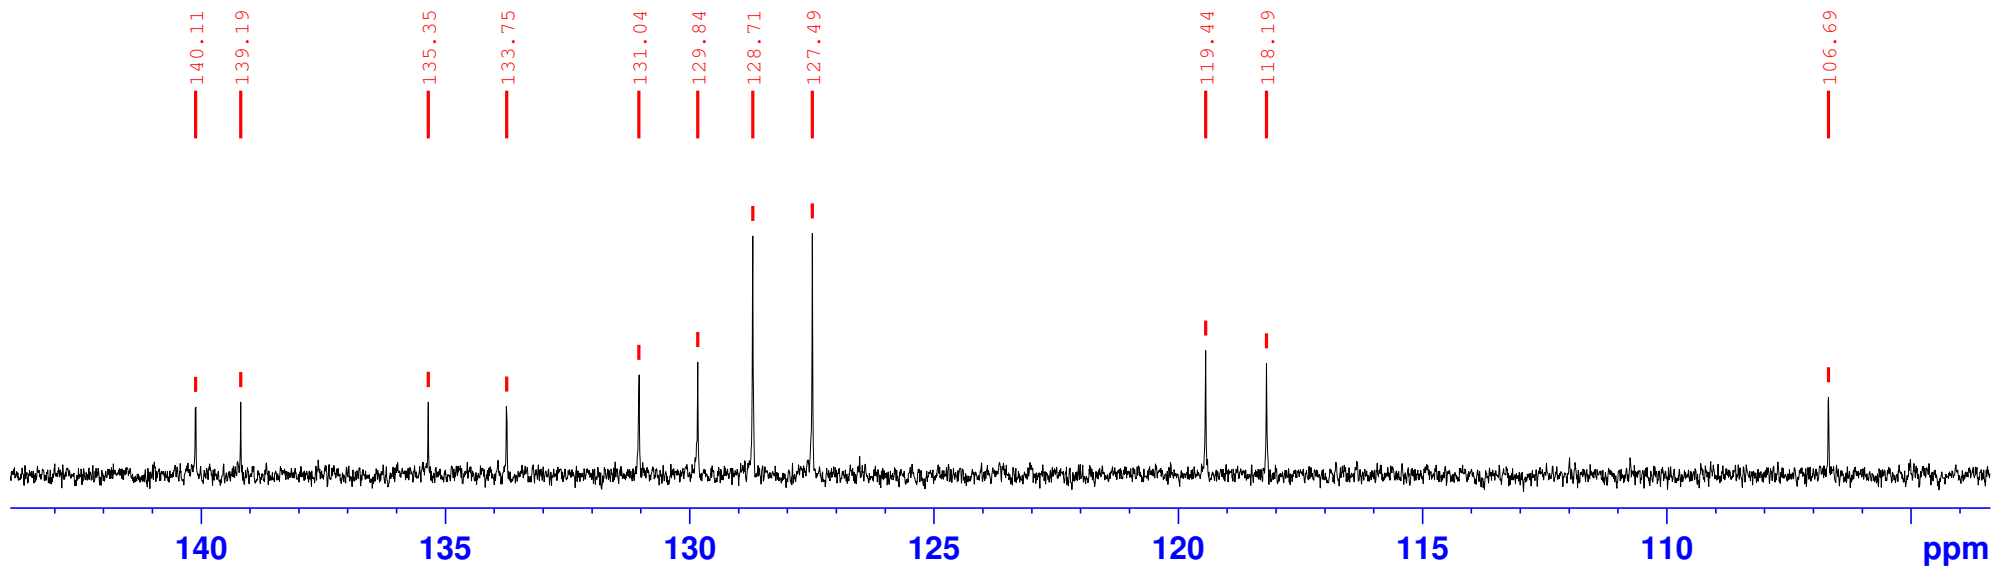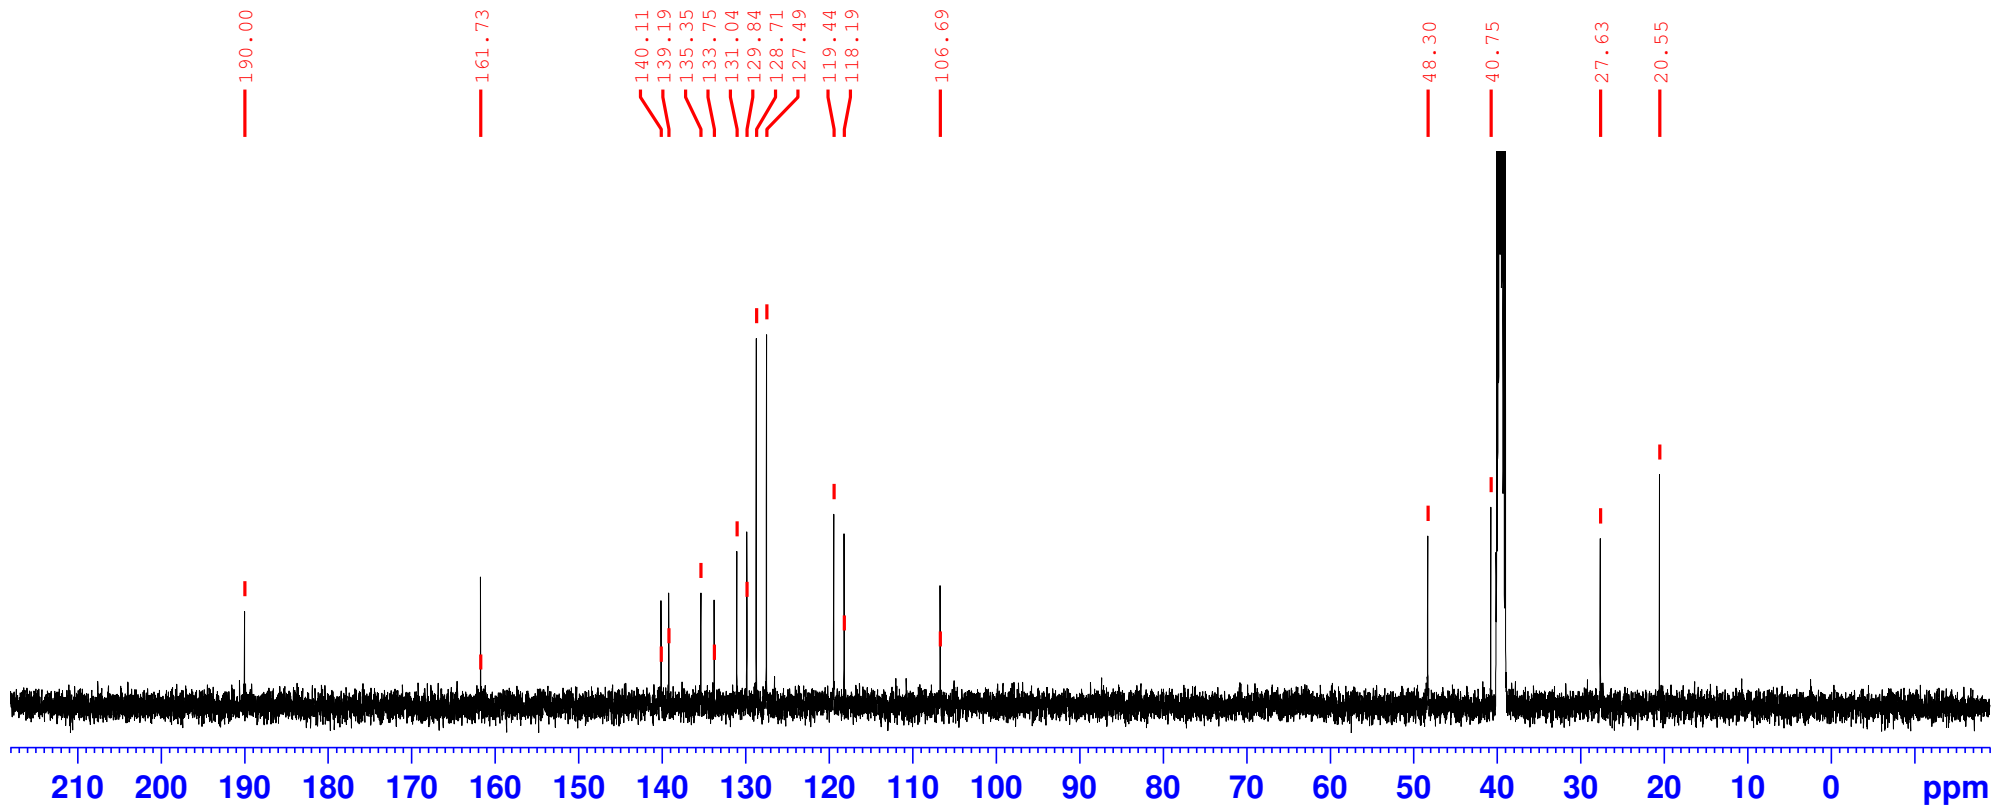

# User Spectrum Plot Report

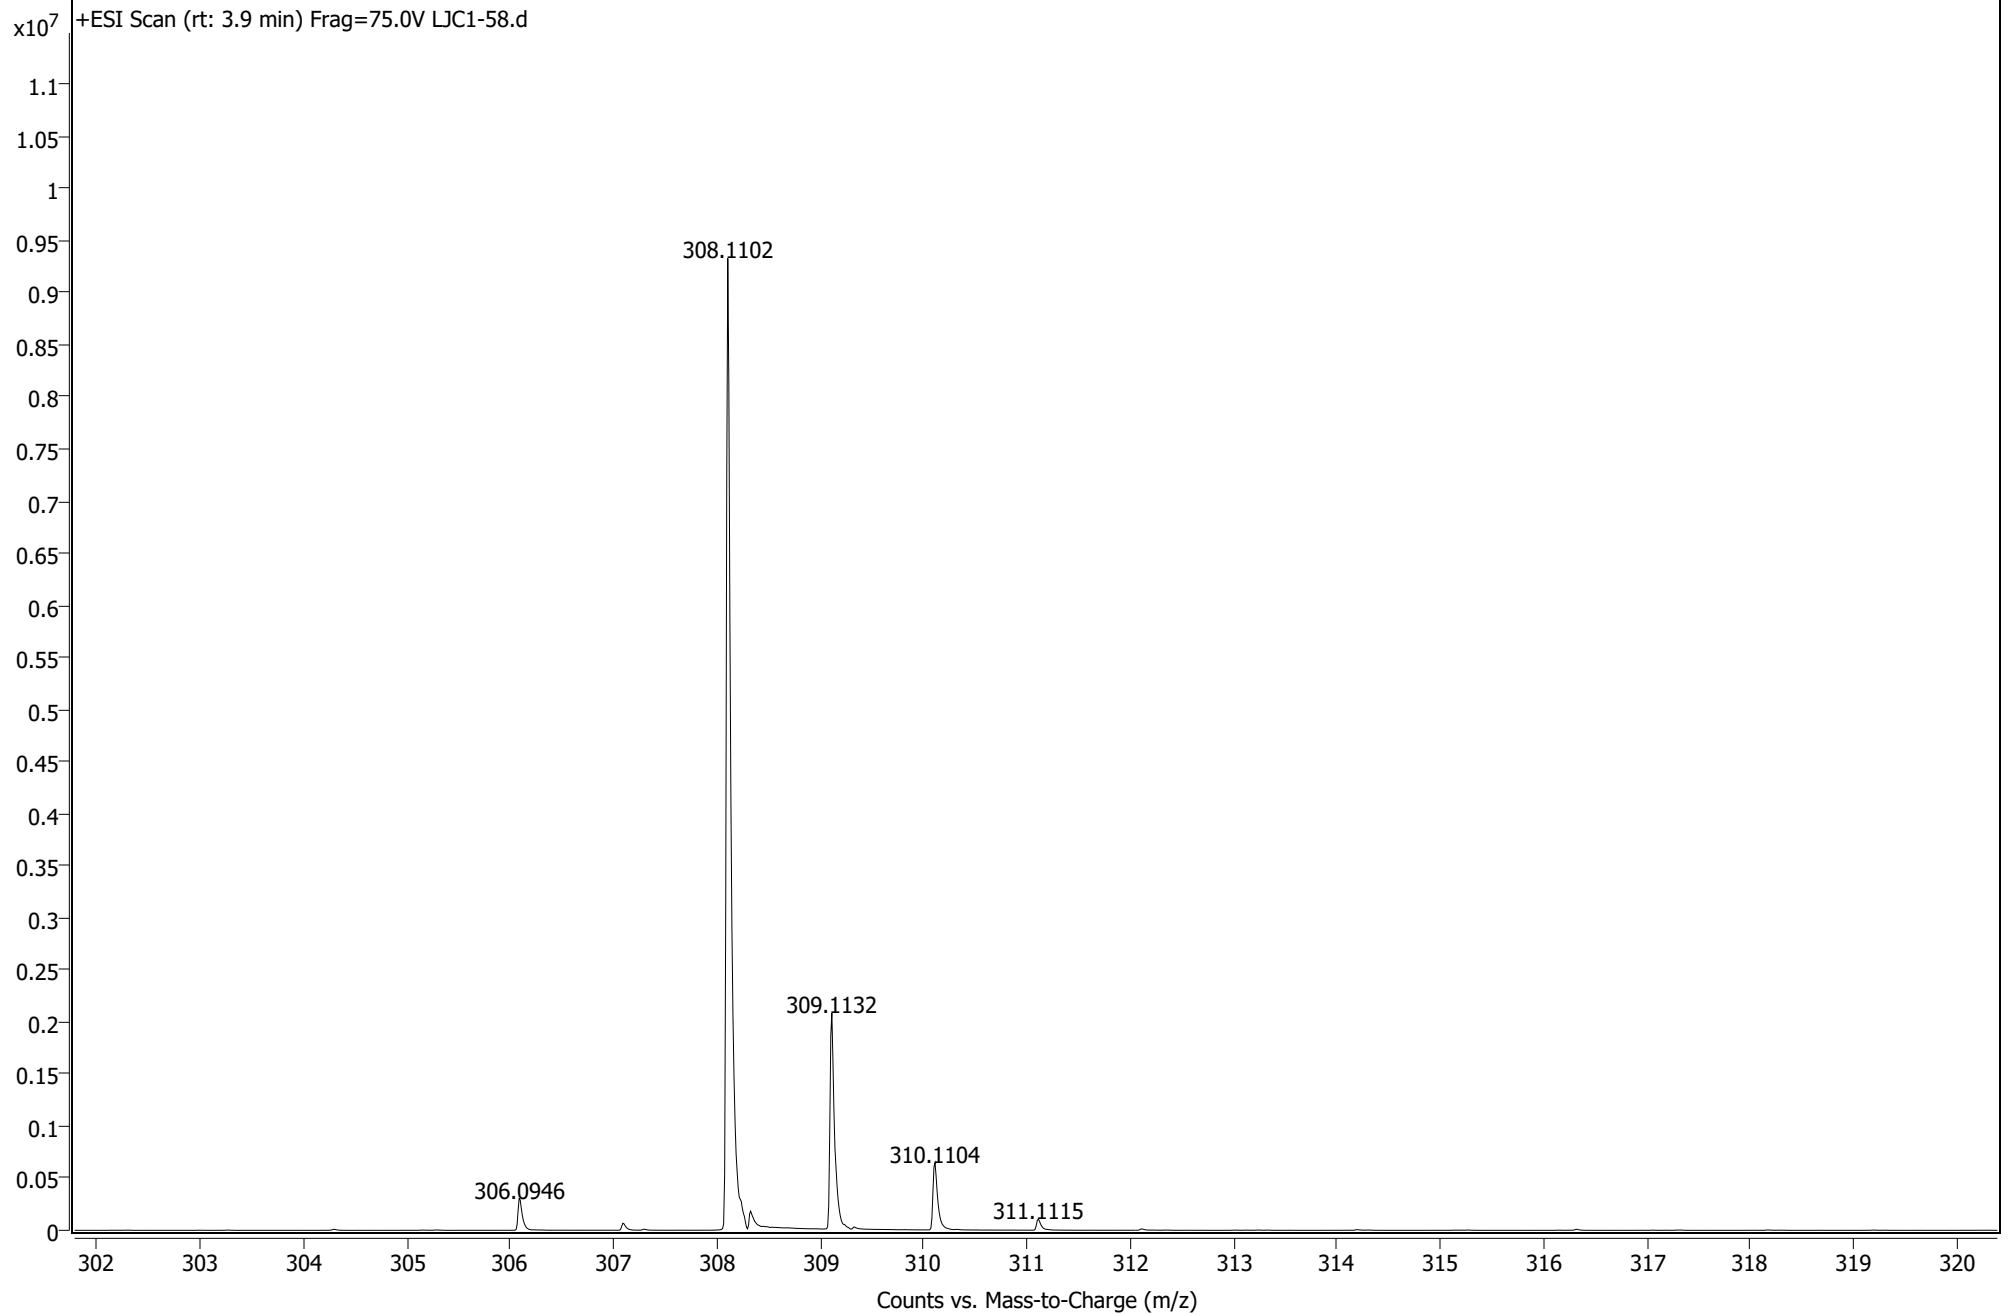

Sample Name: LJC1-58

```

=====
Acq. Operator   : SYSTEM                      Seq. Line :    8
Acq. Instrument : 1220 HPLC                   Location  :   47
Injection Date  : 8/14/2020 6:03:40 PM      Inj       :    1
                                           Inj Volume: 50.000 µl
Method          : C:\Chem32\1\Data\luana 2020-08-14 14-48-41\MOHAMED-SMALL MOLECULE.M (
                Sequence Method)
Last changed    : 8/14/2020 2:48:44 PM by SYSTEM
Sample Info     : LJC1-58
=====

```

Additional Info : Peak(s) manually integrated

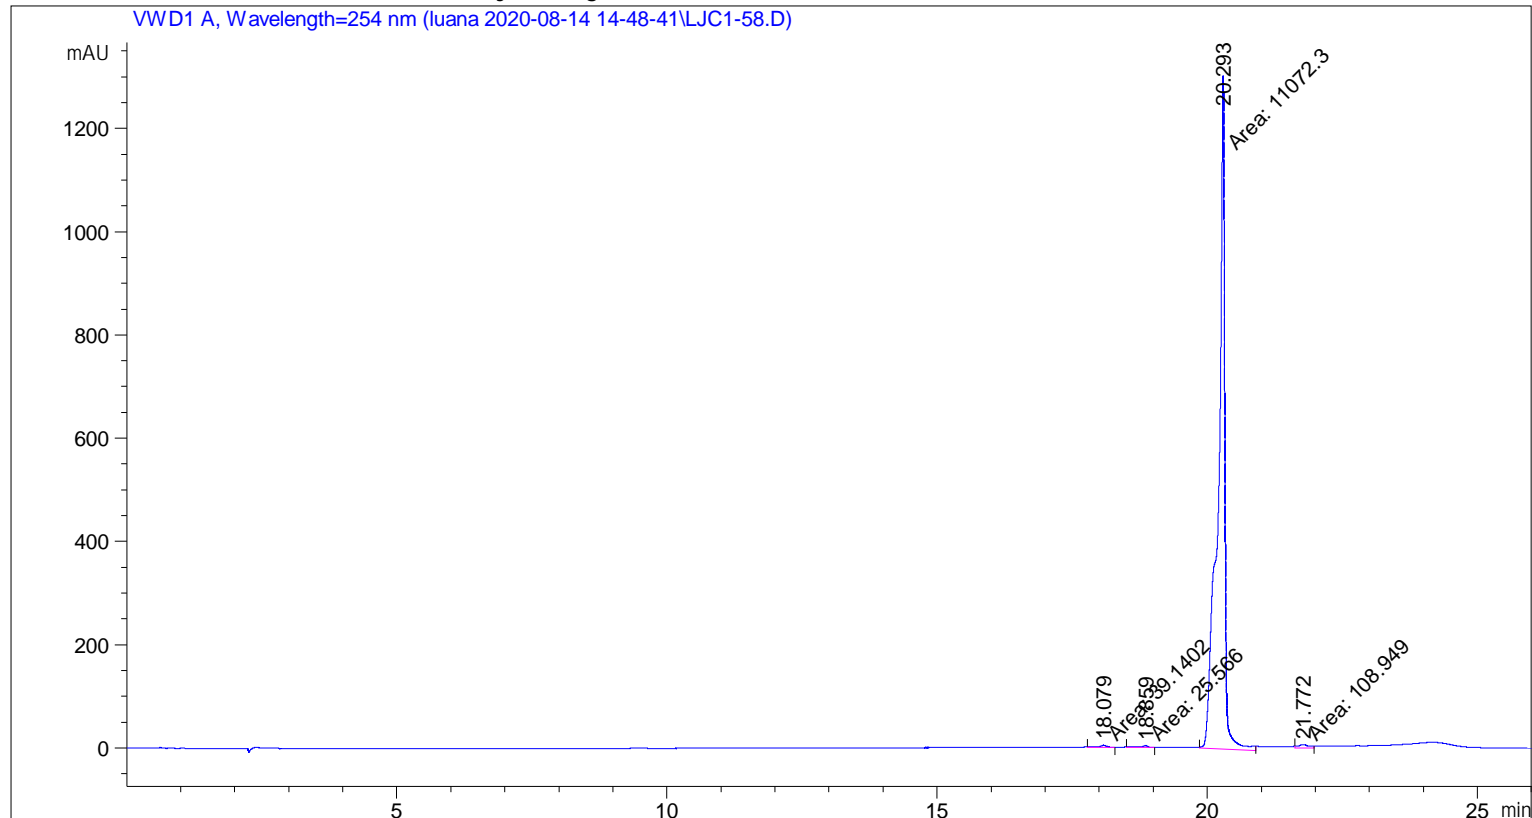

```

=====
                          Area Percent Report
=====

```

```

Sorted By           :      Signal
Multiplier          :      1.0000
Dilution            :      1.0000
Use Multiplier & Dilution Factor with ISTDs

```

Signal 1: VWD1 A, Wavelength=254 nm

| Peak # | RetTime [min] | Type | Width [min] | Area [mAU*s] | Height [mAU] | Area %  |
|--------|---------------|------|-------------|--------------|--------------|---------|
| 1      | 18.079        | MM   | 0.1651      | 39.14021     | 3.95049      | 0.3480  |
| 2      | 18.859        | MM   | 0.1416      | 25.56603     | 3.00918      | 0.2273  |
| 3      | 20.293        | MM   | 0.1415      | 1.10723e4    | 1303.77124   | 98.4558 |
| 4      | 21.772        | MM   | 0.2519      | 108.94907    | 7.20898      | 0.9688  |

```
Totals :                      1.12459e4  1317.93989
```

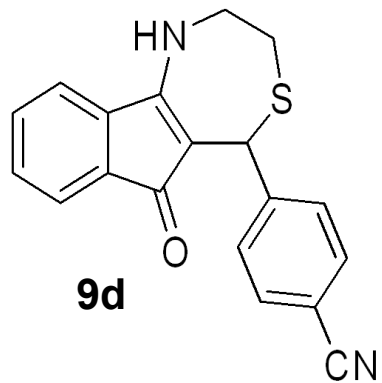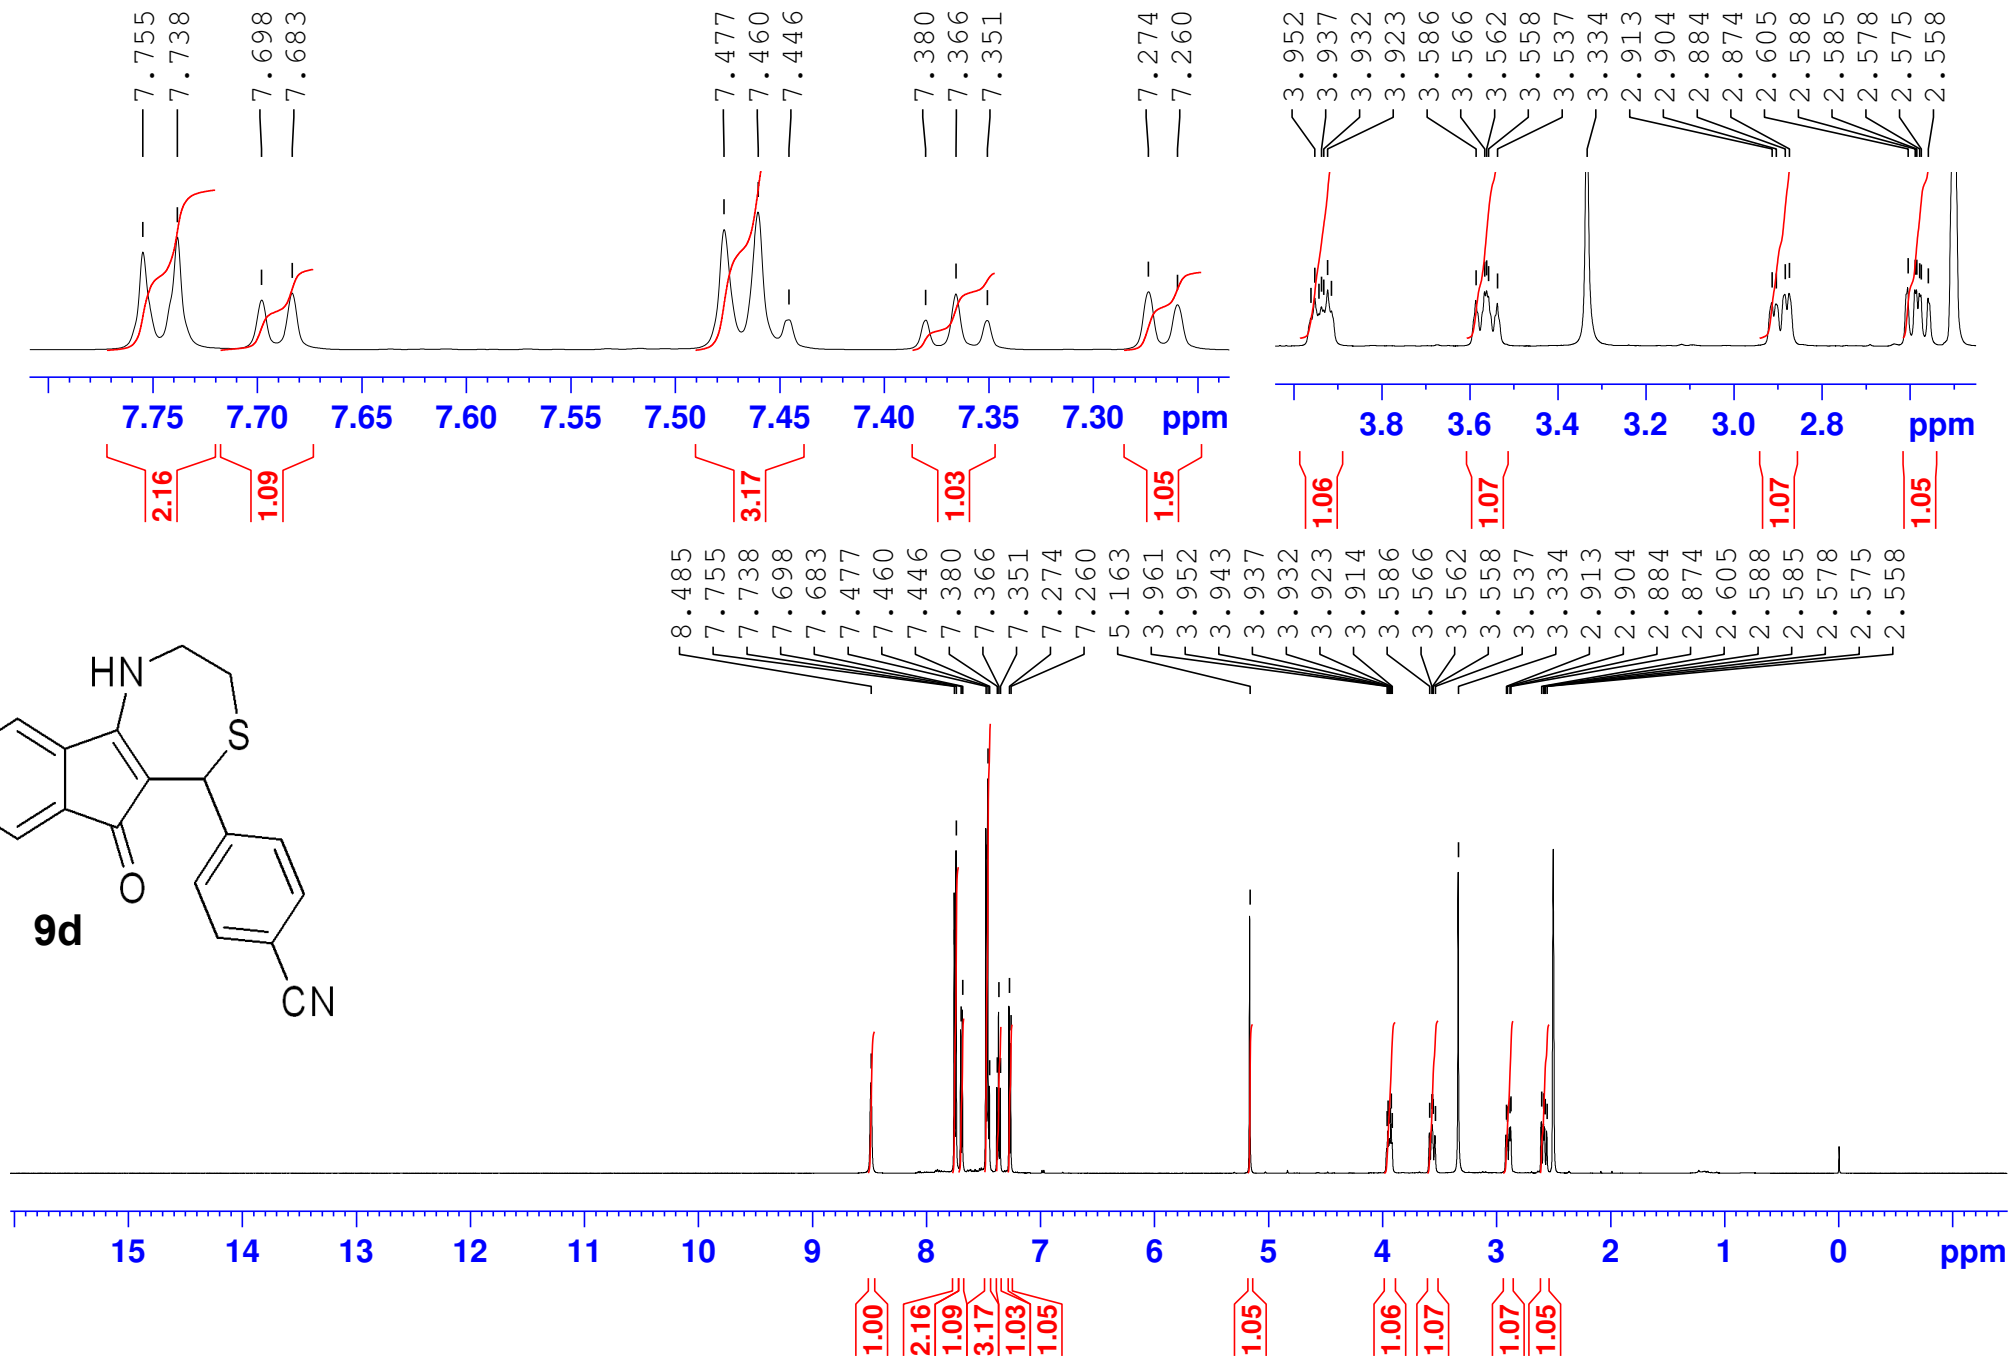

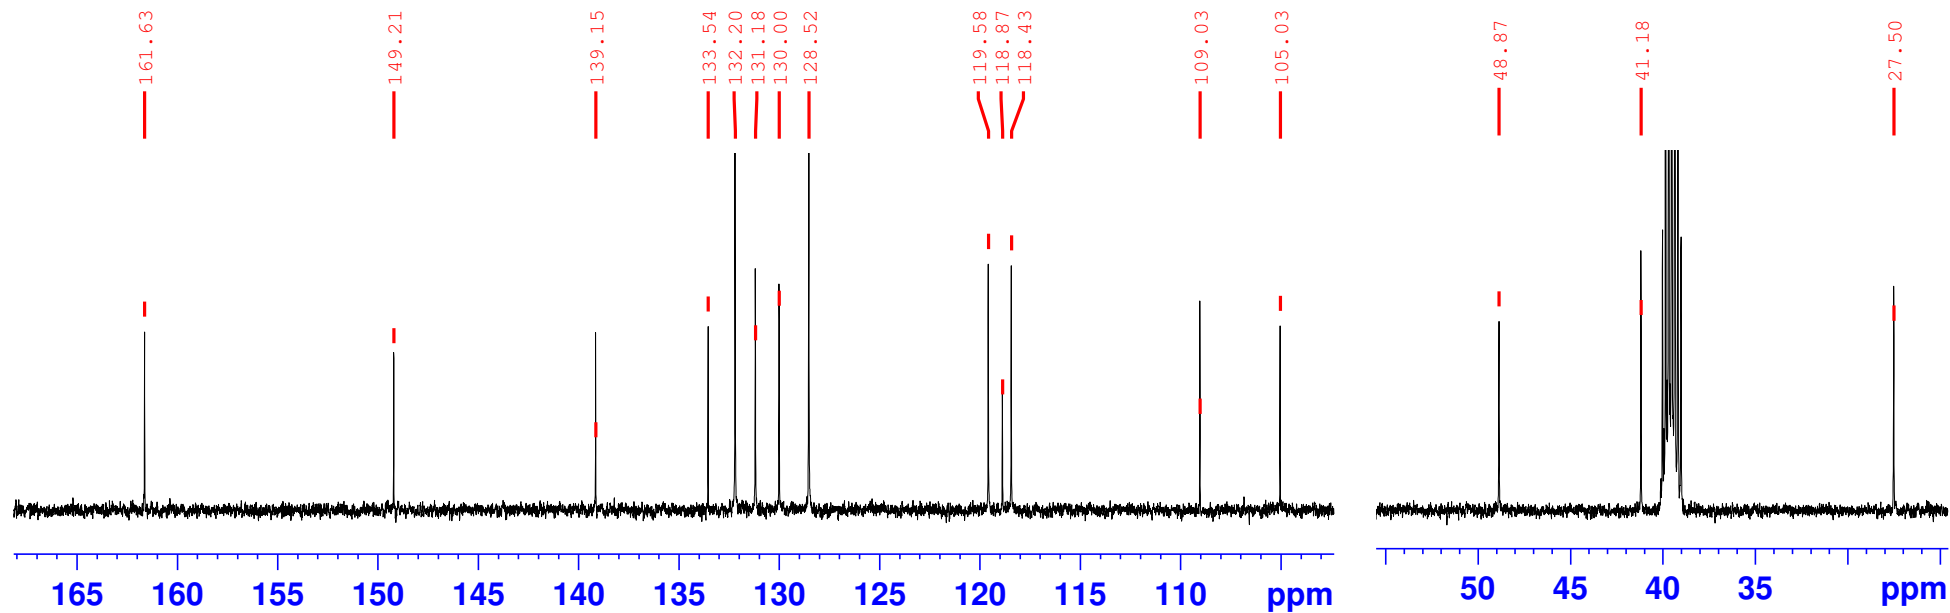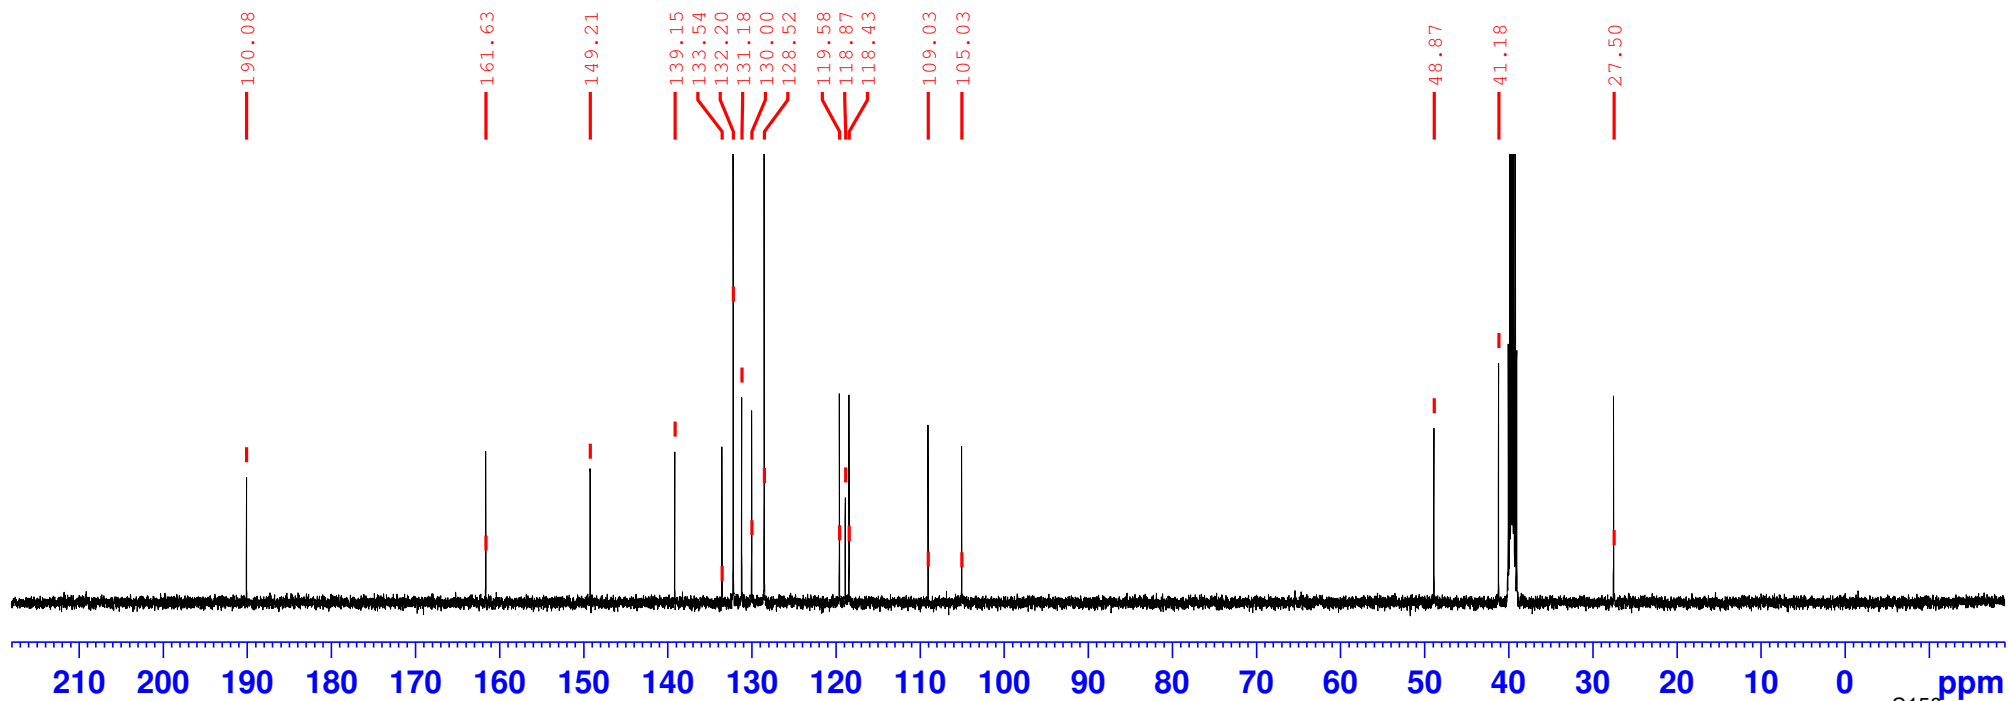

# User Spectrum Plot Report

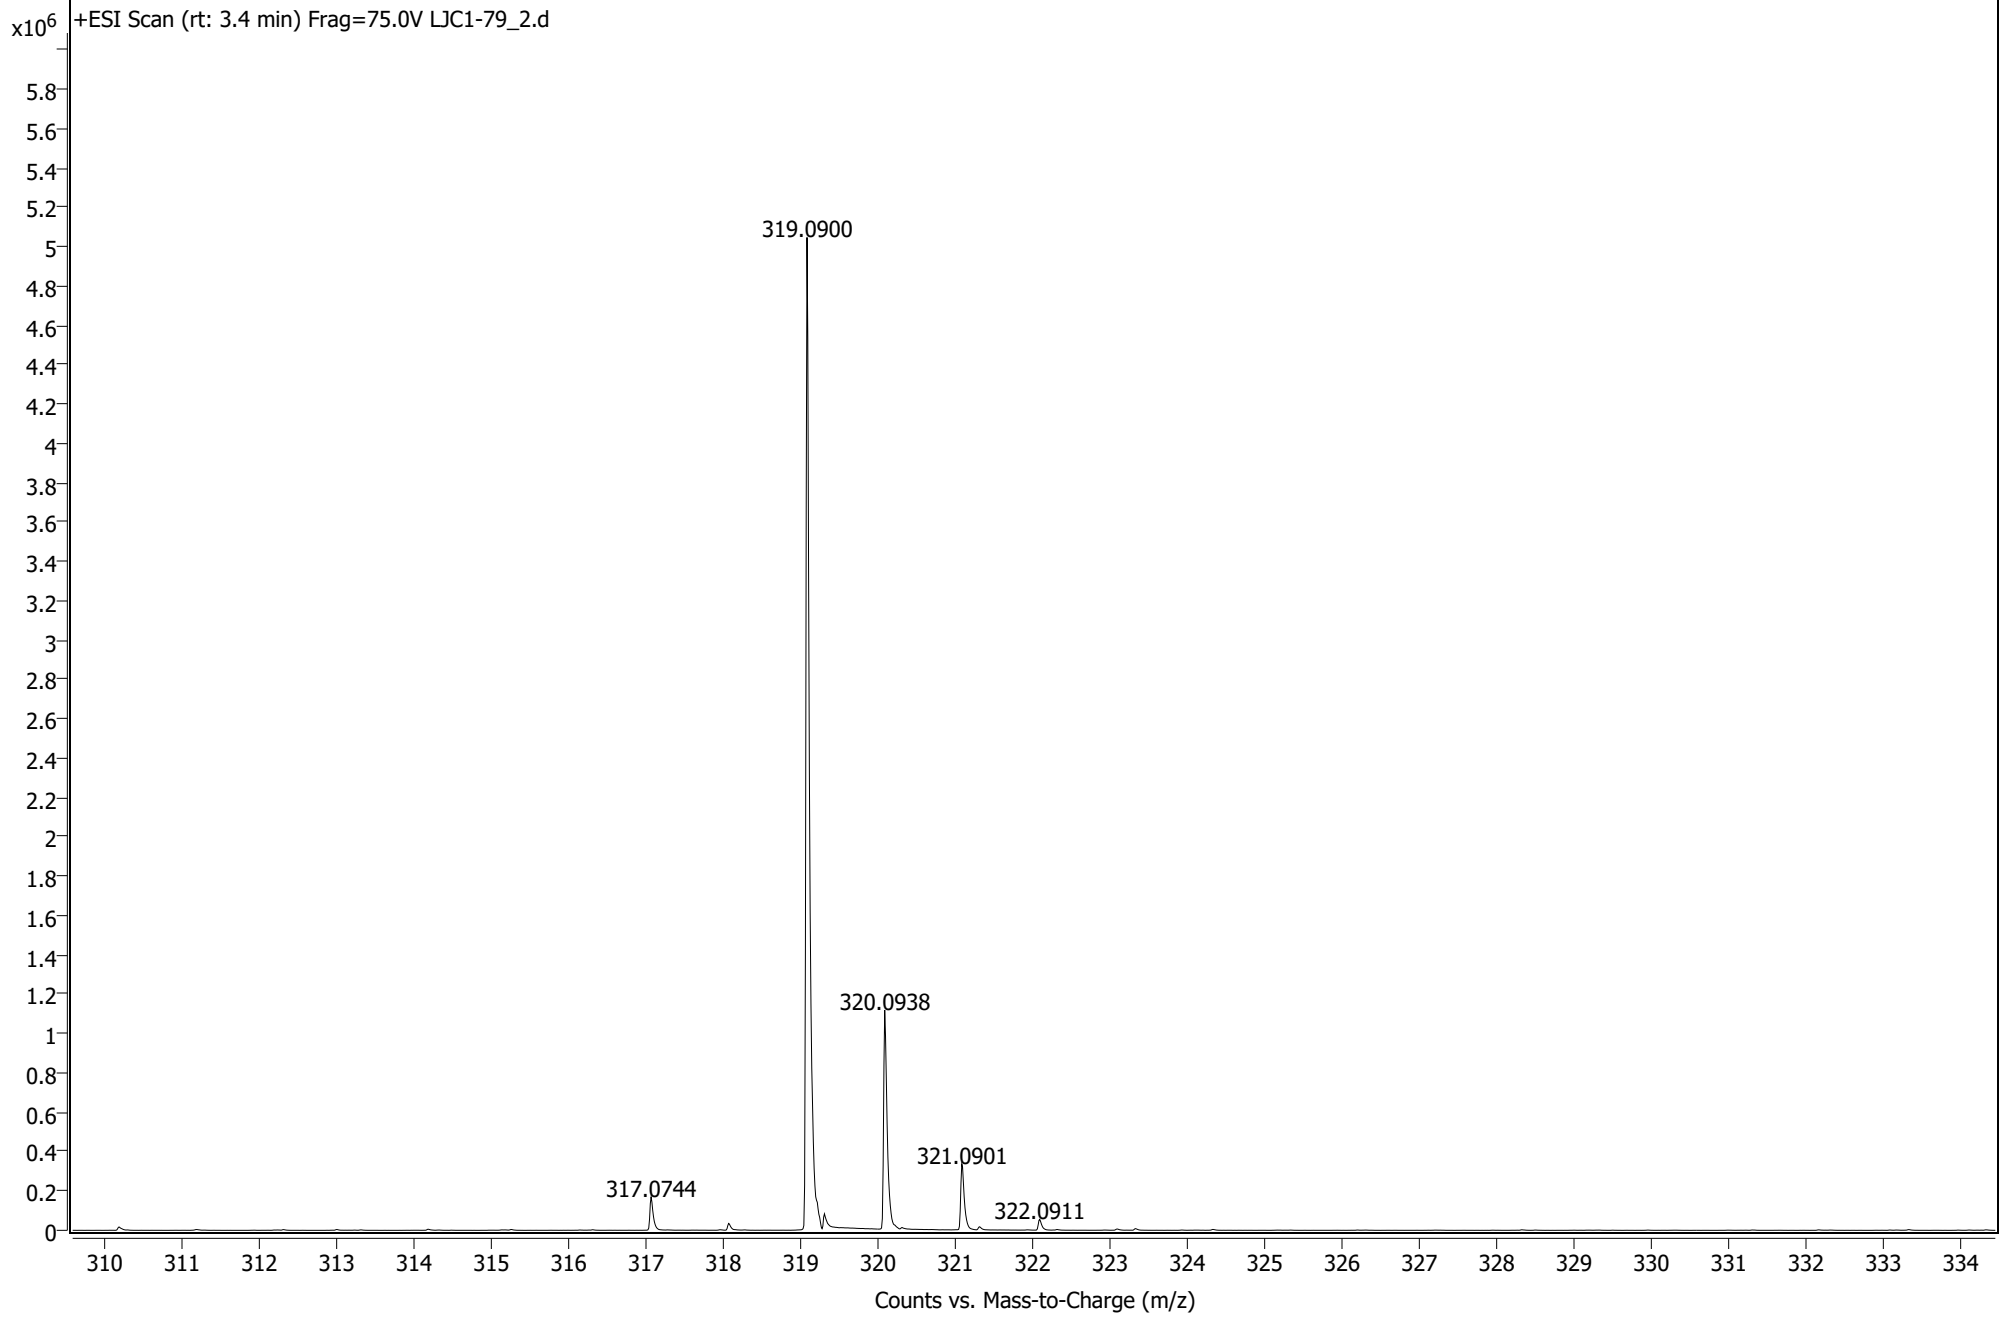

Sample Name: LJC 1-79

```

=====
Acq. Operator   : SYSTEM                      Seq. Line :    5
Acq. Instrument : 1220 HPLC                     Location  :   13
Injection Date  : 10/17/2020 12:35:09 PM      Inj       :    1
                                           Inj Volume : 30.000 µl
Different Inj Volume from Sample Entry! Actual Inj Volume : 50.000 µl
Method          : C:\Chem32\1\Data\luana 2020-10-17 10-44-33\MOHAMED-SMALL MOLECULE.M (
                Sequence Method)
Last changed    : 10/17/2020 11:15:13 AM by SYSTEM
Method Info     : Water/MeOH

Sample Info     : LJC 1-79

```

Additional Info : Peak(s) manually integrated

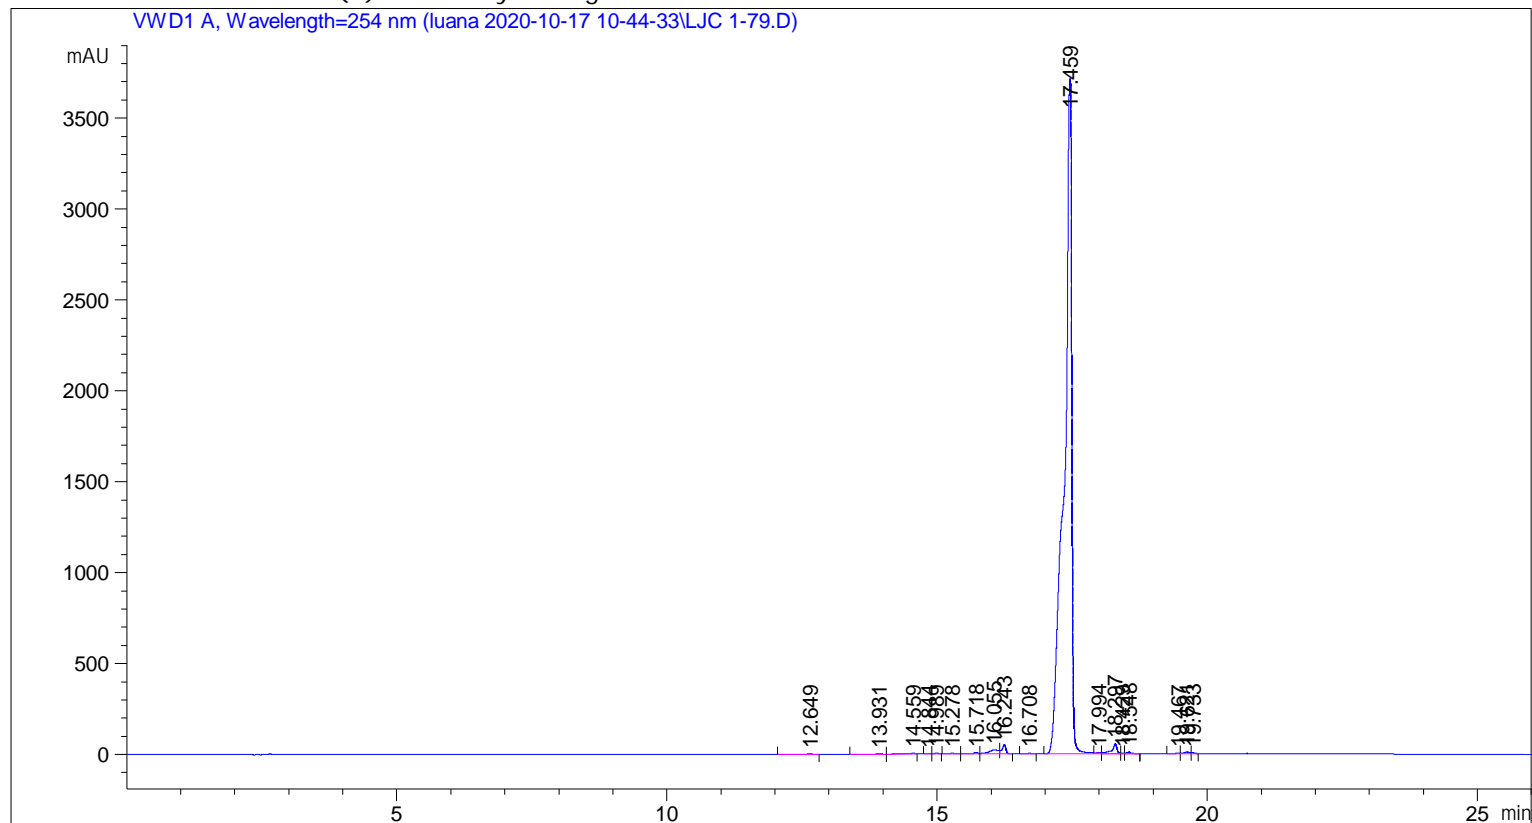

```

=====
                          Area Percent Report
=====

```

```

Sorted By       :      Signal
Multiplier      :      1.0000
Dilution       :      1.0000
Use Multiplier & Dilution Factor with ISTDs

```

Signal 1: VWD1 A, Wavelength=254 nm

| Peak # | RetTime [min] | Type | Width [min] | Area [mAU*s] | Height [mAU] | Area % |
|--------|---------------|------|-------------|--------------|--------------|--------|
| 1      | 12.649        | BB   | 0.1226      | 20.55055     | 2.09135      | 0.0555 |
| 2      | 13.931        | VB R | 0.0908      | 21.93307     | 3.28732      | 0.0592 |
| 3      | 14.559        | BV   | 0.0928      | 33.31458     | 4.93156      | 0.0899 |
| 4      | 14.844        | VV   | 0.0821      | 12.82092     | 2.10325      | 0.0346 |



Sample Name: LJC 1-79

| Peak # | RetTime [min] | Type | Width [min] | Area [mAU*s] | Height [mAU] | Area %  |
|--------|---------------|------|-------------|--------------|--------------|---------|
| 5      | 14.989        | VB   | 0.0688      | 23.22619     | 4.94741      | 0.0627  |
| 6      | 15.278        | BB   | 0.0772      | 19.17062     | 3.40290      | 0.0517  |
| 7      | 15.718        | BV   | 0.0777      | 38.66483     | 7.13433      | 0.1044  |
| 8      | 16.055        | VV   | 0.1539      | 267.20959    | 22.69629     | 0.7213  |
| 9      | 16.243        | VB   | 0.0720      | 248.54134    | 50.43850     | 0.6709  |
| 10     | 16.708        | VB   | 0.1168      | 22.43918     | 2.61044      | 0.0606  |
| 11     | 17.459        | BV R | 0.1337      | 3.57887e4    | 3704.77710   | 96.6014 |
| 12     | 17.994        | VV E | 0.0663      | 25.06681     | 5.58914      | 0.0677  |
| 13     | 18.297        | VV E | 0.0913      | 353.53152    | 54.08081     | 0.9543  |
| 14     | 18.429        | VV E | 0.0560      | 13.77770     | 3.49556      | 0.0372  |
| 15     | 18.548        | VB E | 0.0770      | 52.10620     | 9.64934      | 0.1406  |
| 16     | 19.467        | BV   | 0.0813      | 15.09106     | 2.78262      | 0.0407  |
| 17     | 19.621        | VV   | 0.0936      | 69.62948     | 10.20920     | 0.1879  |
| 18     | 19.733        | VB   | 0.0634      | 22.03541     | 5.20063      | 0.0595  |

Totals : 3.70478e4 3899.42776

=====  
\*\*\* End of Report \*\*\*

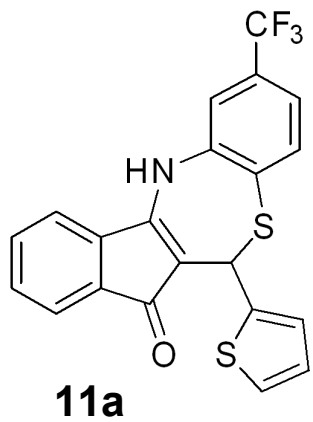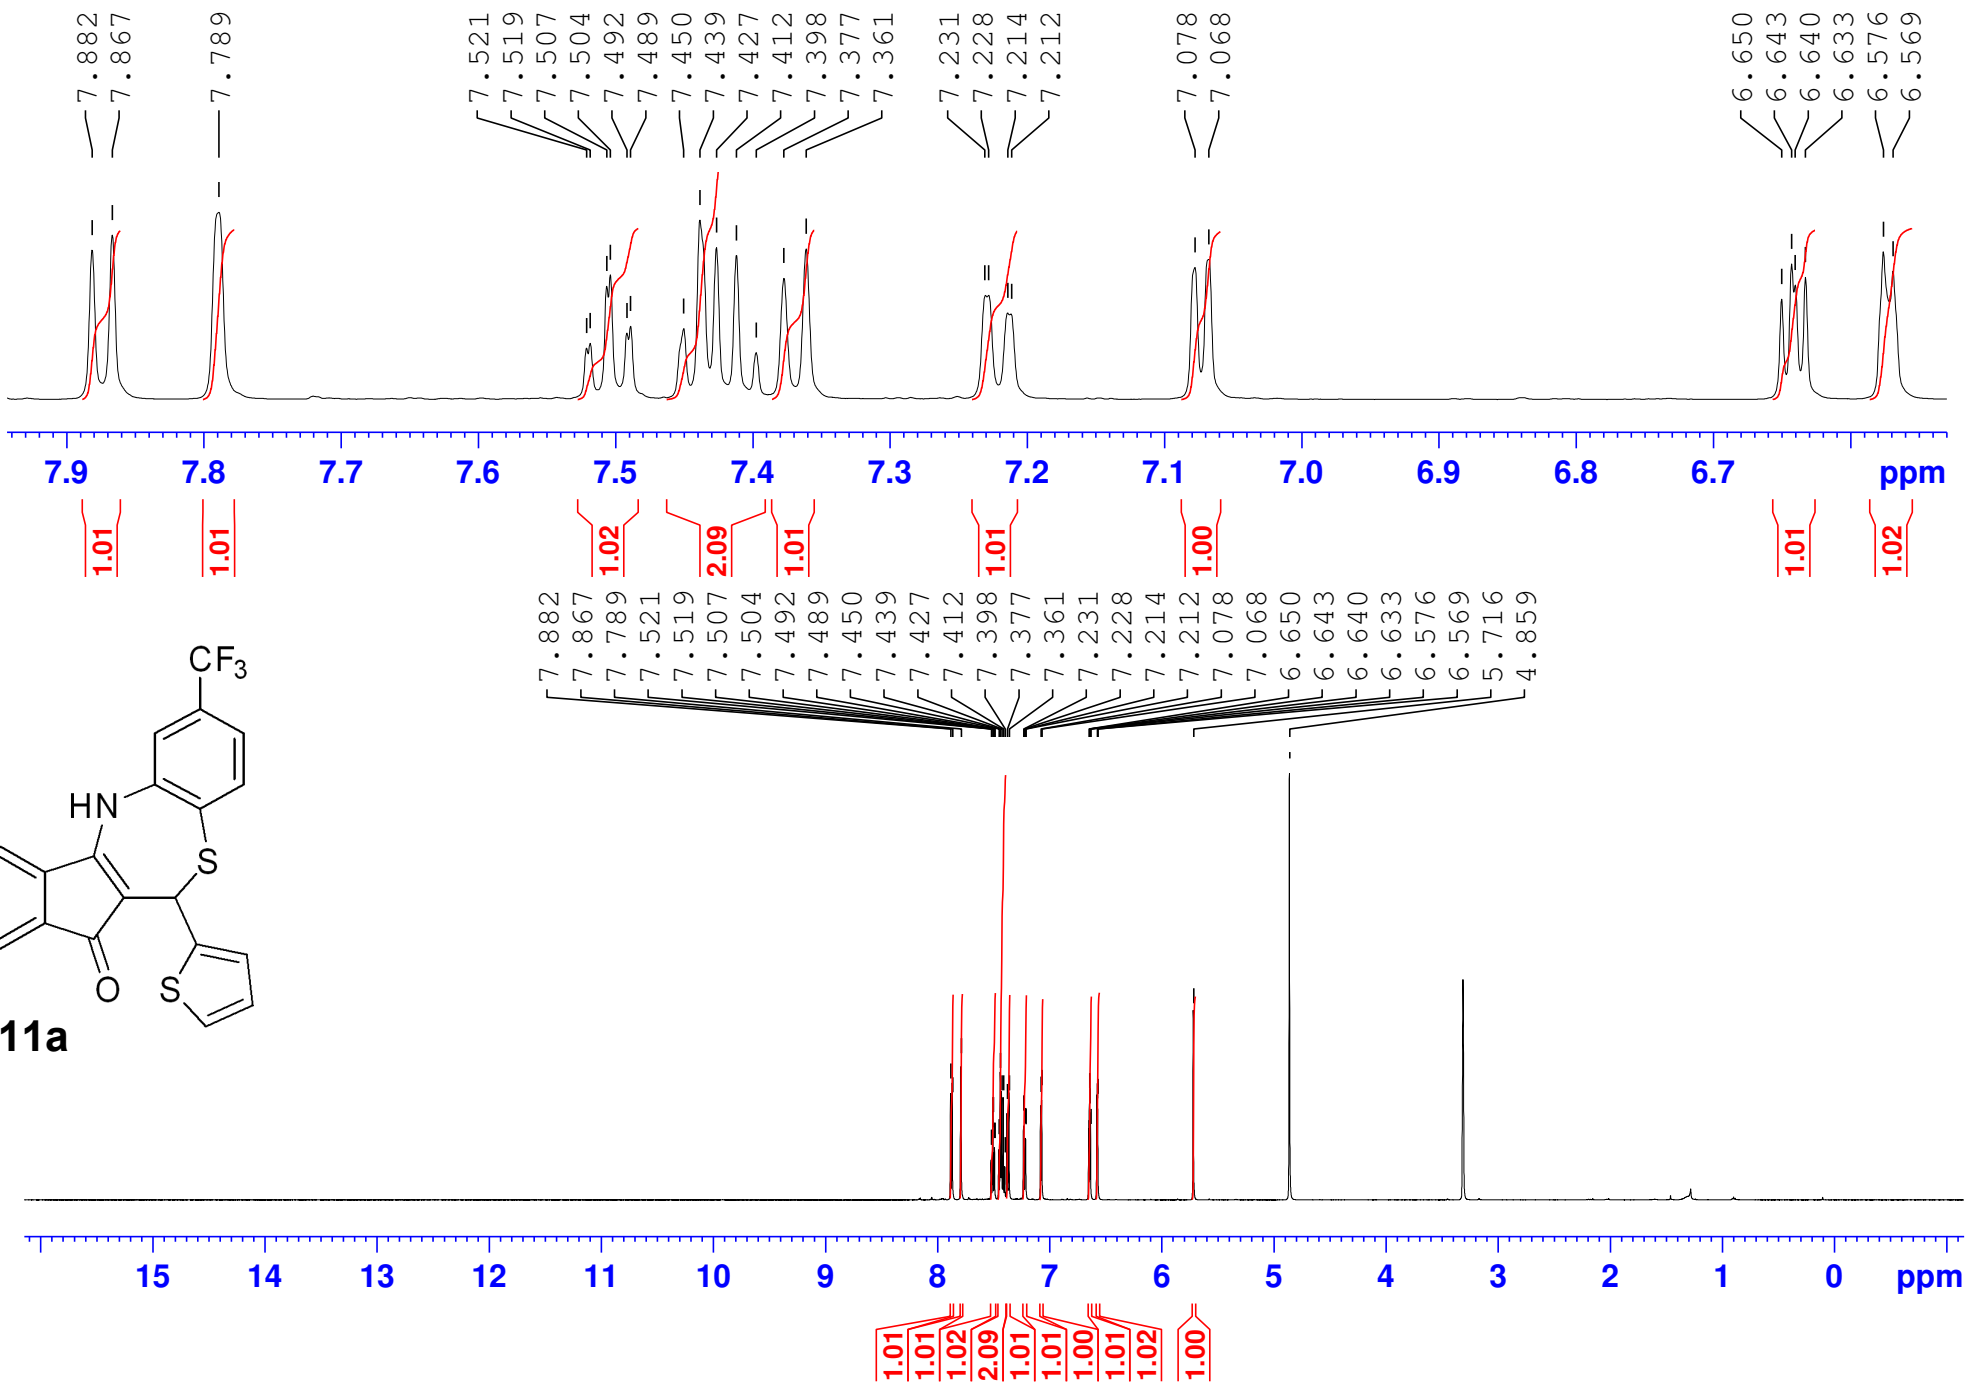

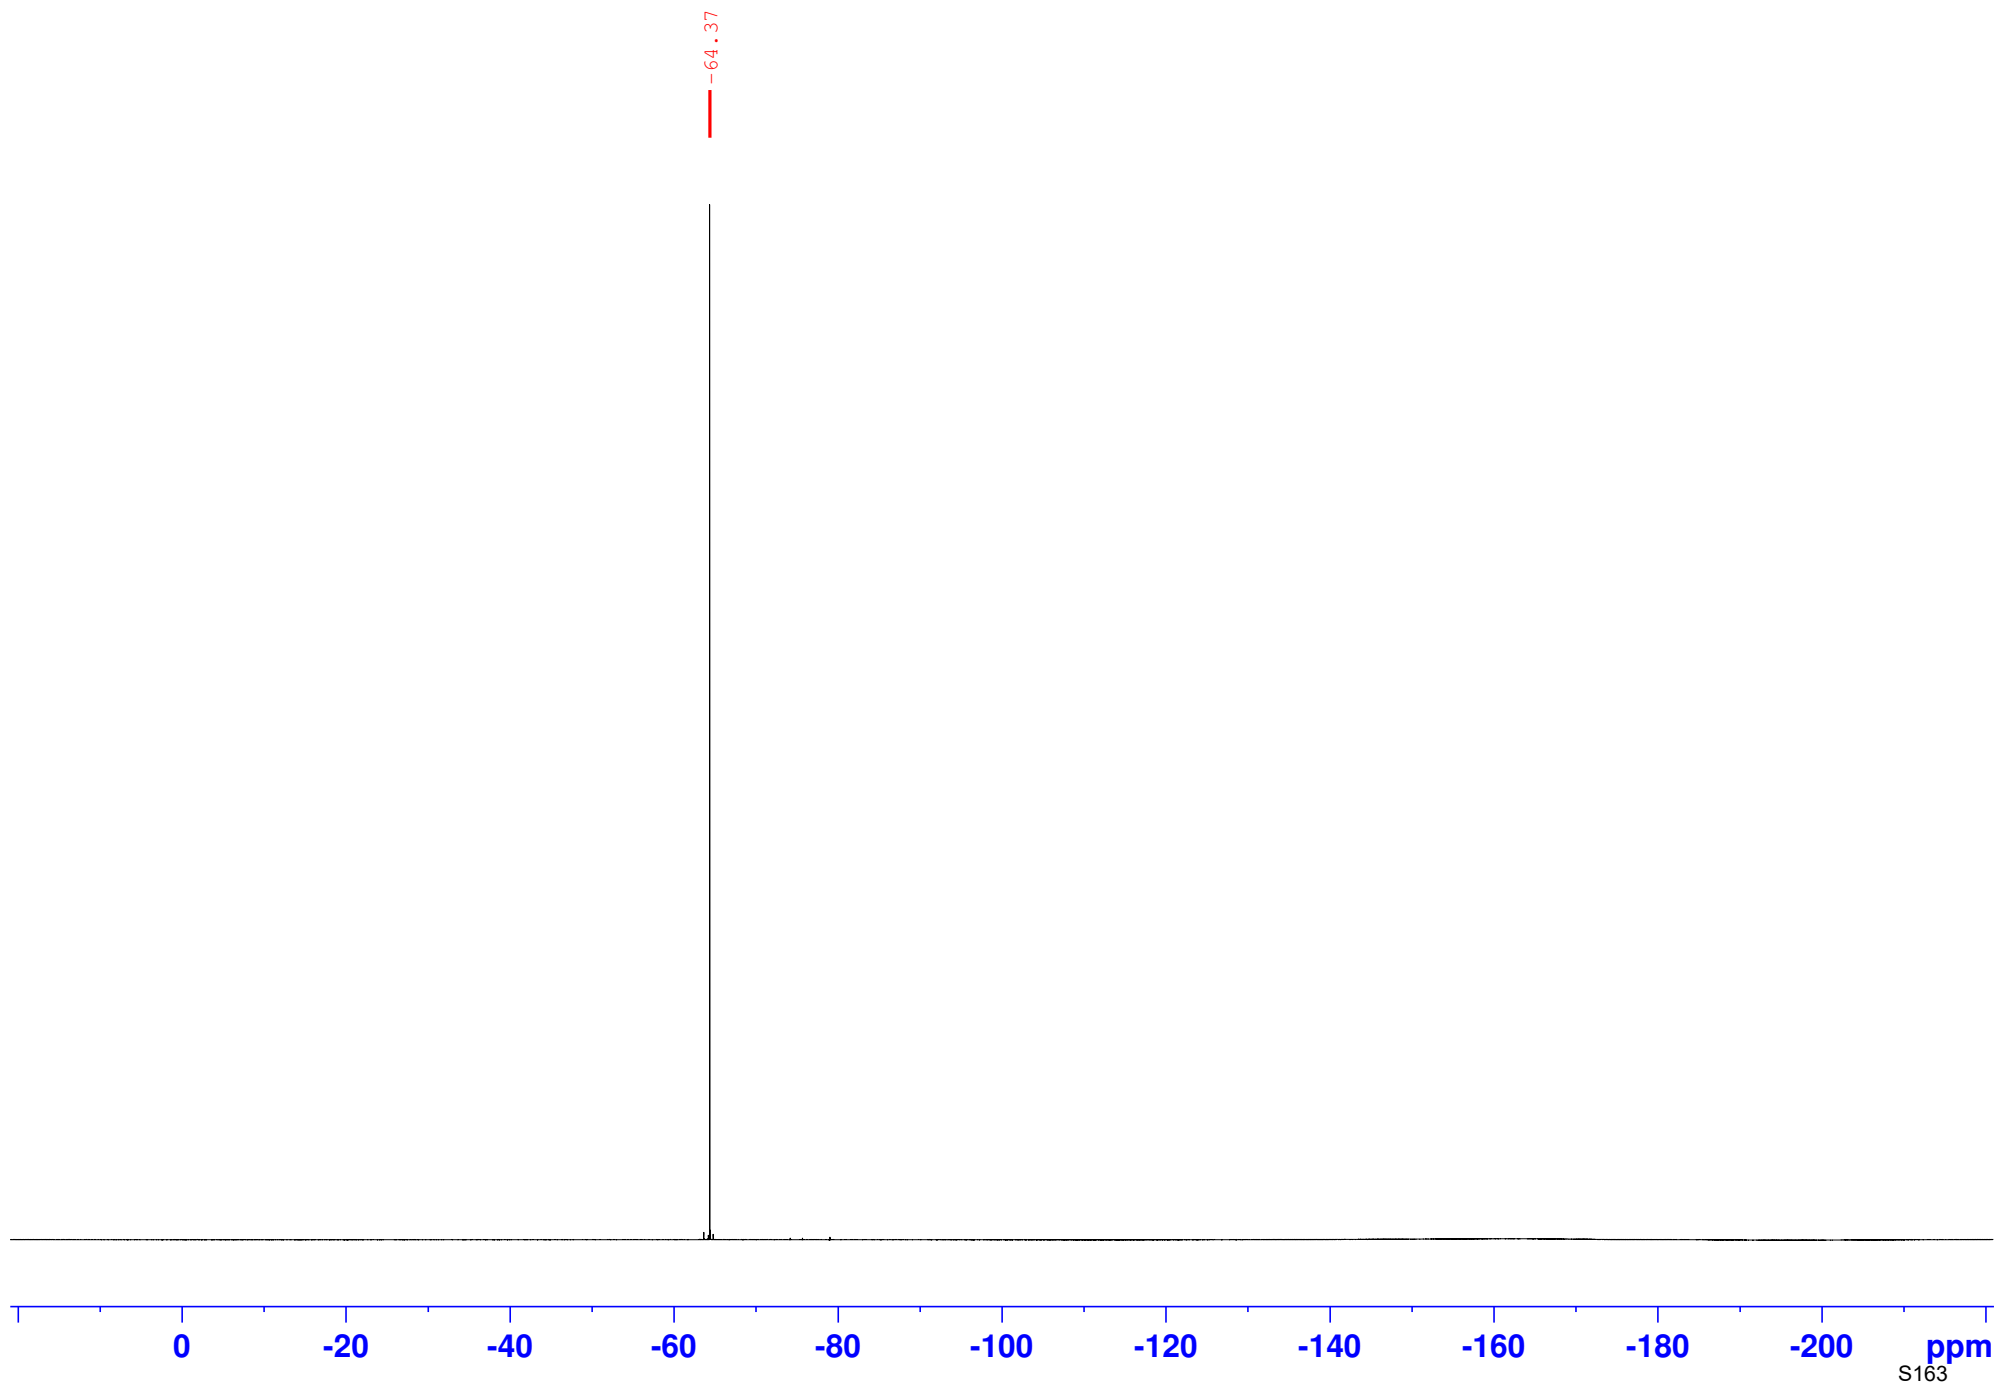

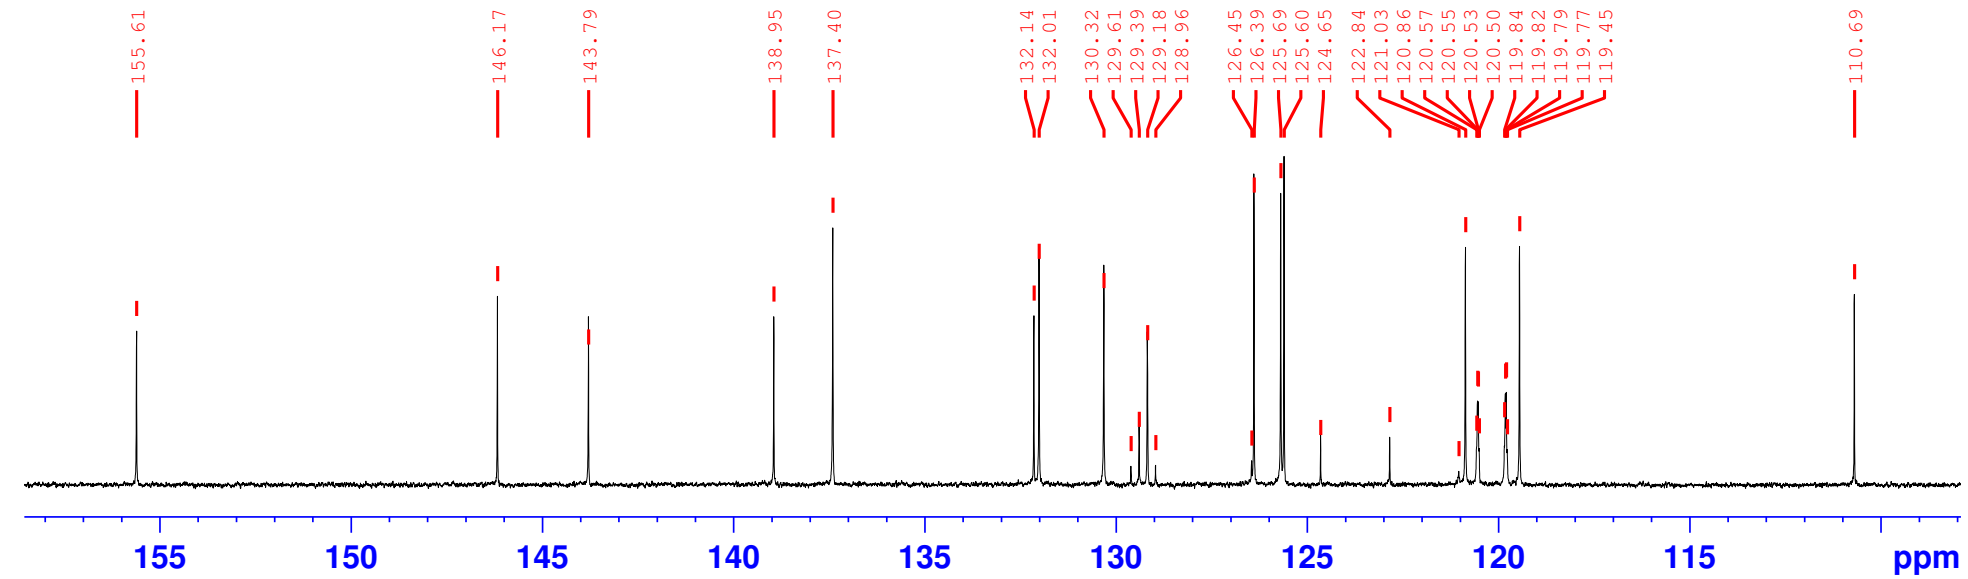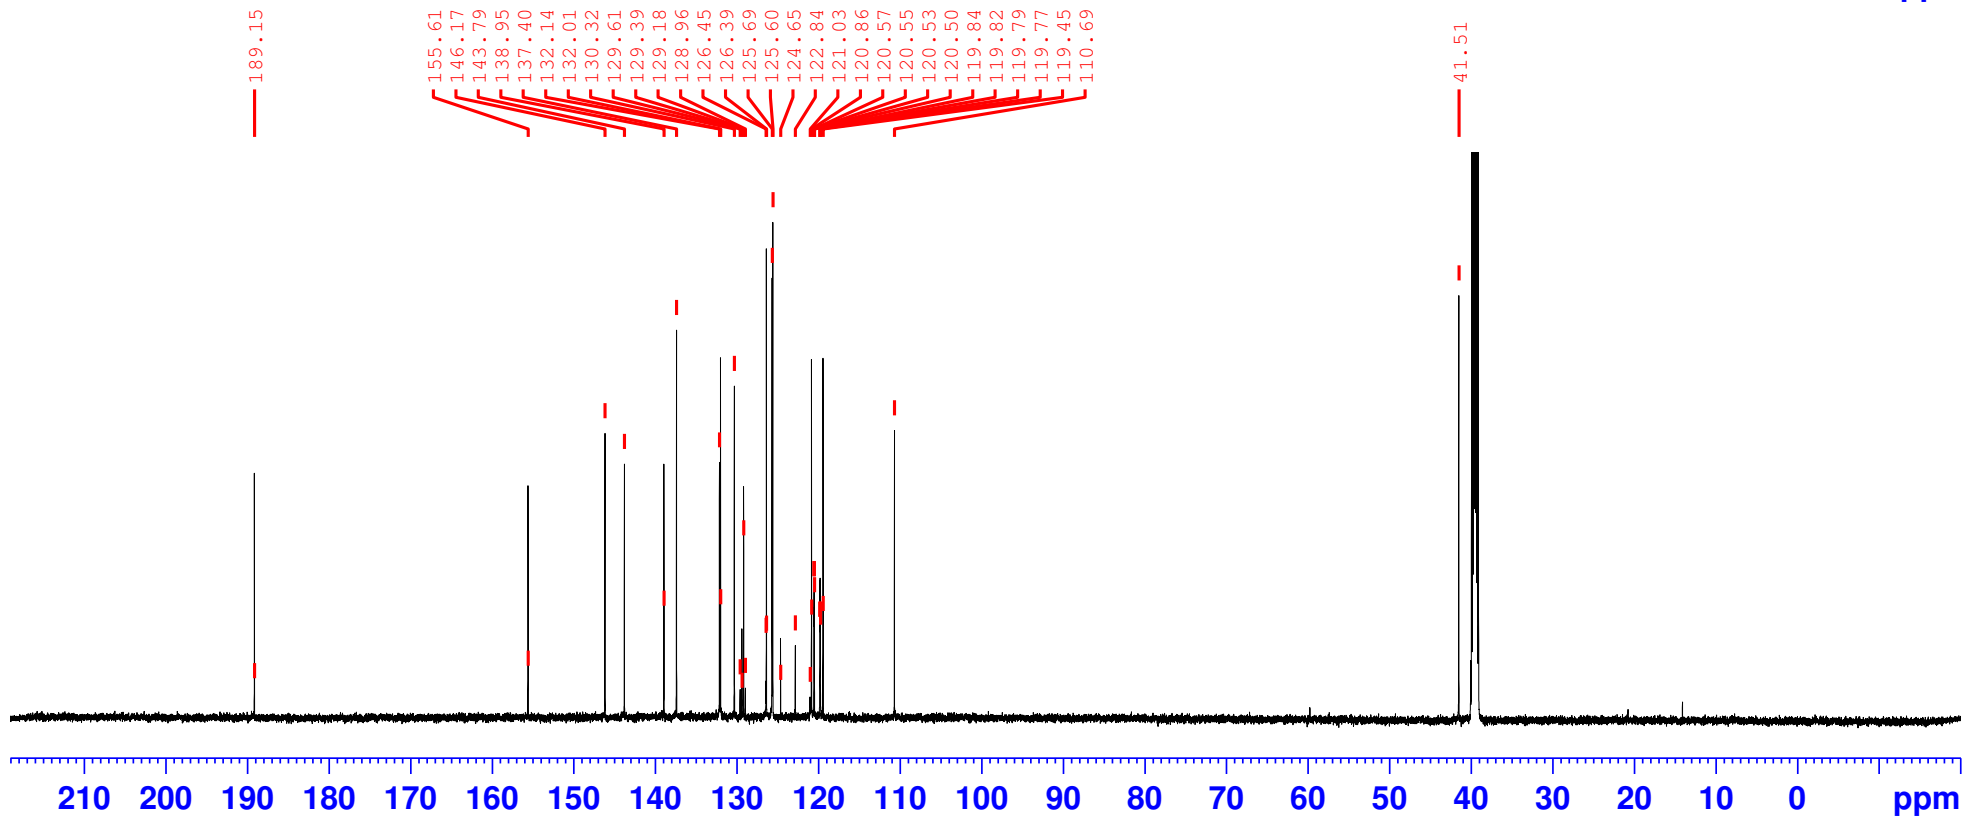

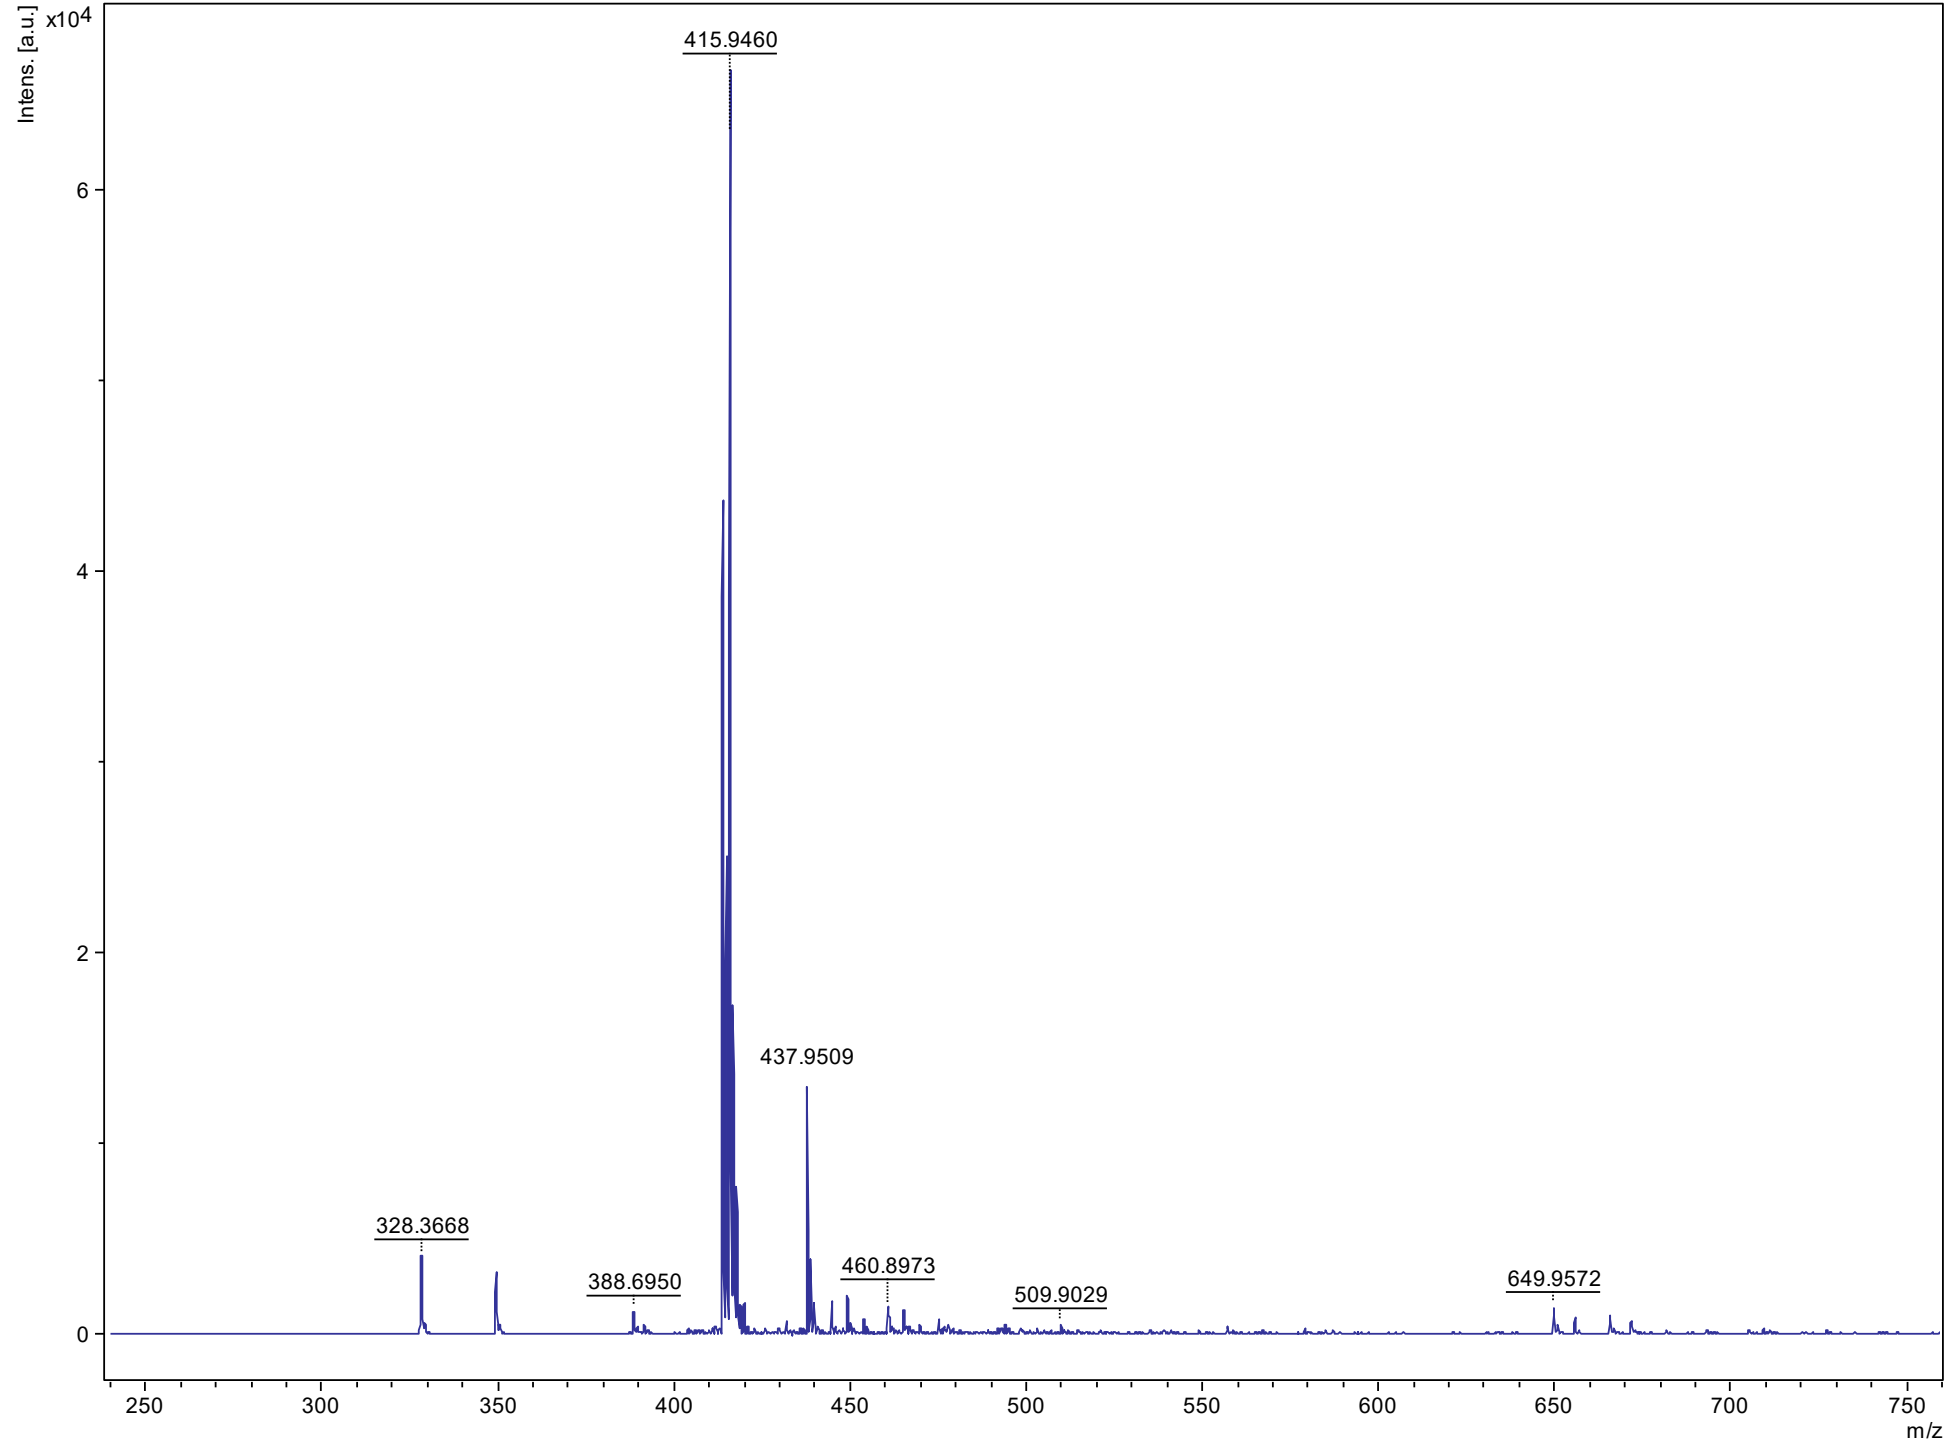

Sample Name: LJC 1-85

```

=====
Acq. Operator   : SYSTEM                      Seq. Line :    2
Acq. Instrument : 1220 HPLC                     Location  :    4
Injection Date  : 11/11/2020 5:52:23 PM      Inj       :    1
                                           Inj Volume: 30.000 µl
Different Inj Volume from Sample Entry! Actual Inj Volume : 50.000 µl
Method          : C:\Chem32\1\Data\Audifas 2020-11-11 17-22-49\MOHAMED-SMALL MOLECULE.M (
                Sequence Method)
Last changed    : 11/11/2020 5:22:52 PM by SYSTEM
Method Info     : Water/MeOH

Sample Info     : LJC 1-85
  
```

Additional Info : Peak(s) manually integrated

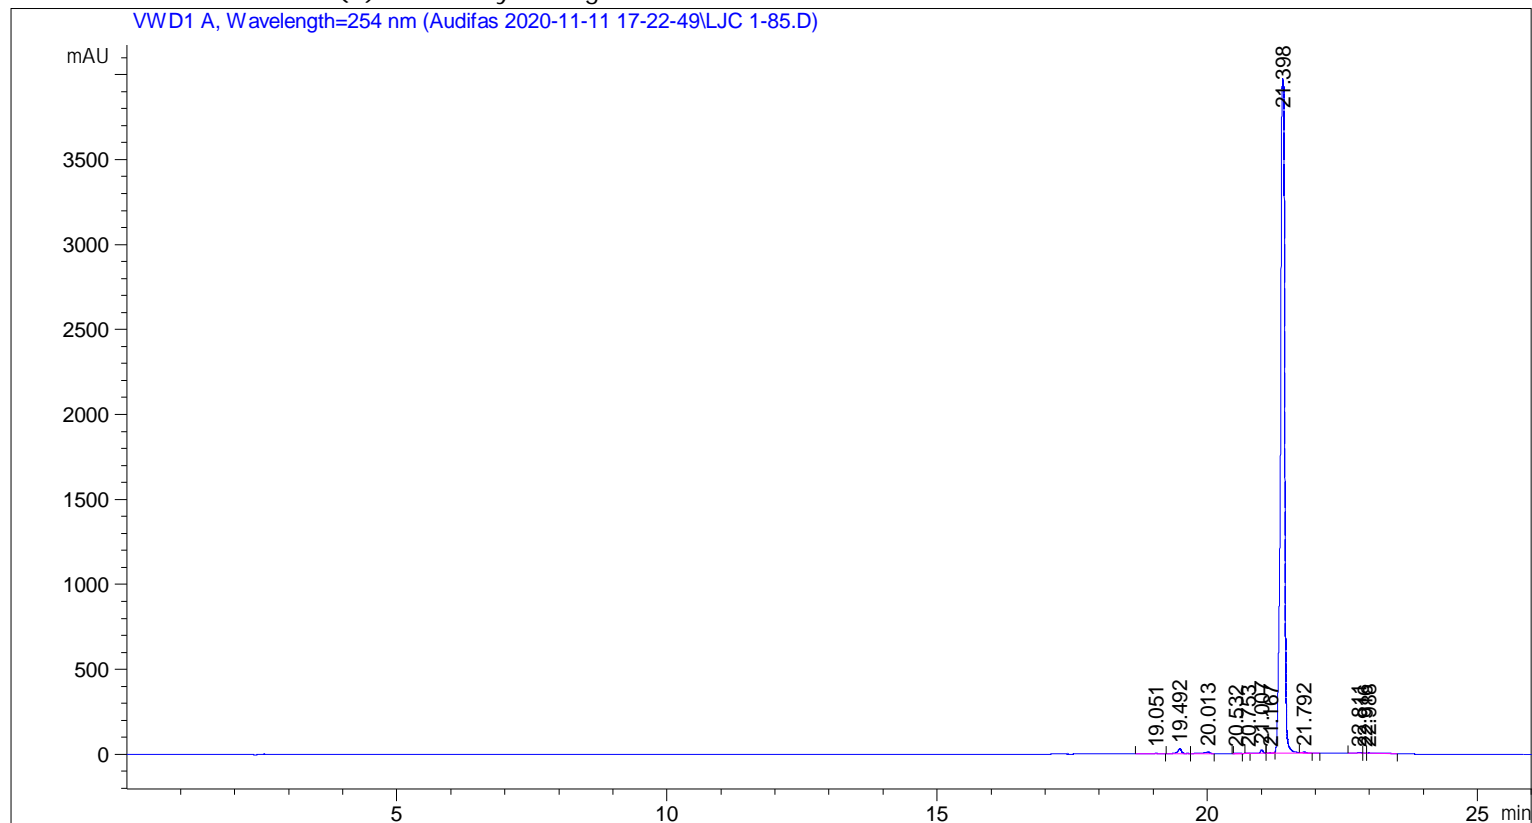

```

=====
                          Area Percent Report
=====
  
```

```

Sorted By           :      Signal
Multiplier          :      1.0000
Dilution            :      1.0000
Use Multiplier & Dilution Factor with ISTDs
  
```

Signal 1: VWD1 A, Wavelength=254 nm

| Peak # | RetTime [min] | Type | Width [min] | Area [mAU*s] | Height [mAU] | Area % |
|--------|---------------|------|-------------|--------------|--------------|--------|
| 1      | 19.051        | VB R | 0.1591      | 39.64460     | 3.03182      | 0.1827 |
| 2      | 19.492        | BV R | 0.0751      | 151.18680    | 29.10480     | 0.6968 |
| 3      | 20.013        | BB   | 0.1068      | 81.95588     | 10.30119     | 0.3777 |
| 4      | 20.532        | BV E | 0.0570      | 9.14087      | 2.31754      | 0.0421 |

S166

Sample Name: LJC 1-85

| Peak # | RetTime [min] | Type | Width [min] | Area [mAU*s] | Height [mAU] | Area %  |
|--------|---------------|------|-------------|--------------|--------------|---------|
| 5      | 20.753        | VV E | 0.0447      | 5.68136      | 1.94046      | 0.0262  |
| 6      | 21.007        | VB R | 0.0564      | 83.93385     | 21.81769     | 0.3869  |
| 7      | 21.167        | BV E | 0.0608      | 12.68903     | 2.91231      | 0.0585  |
| 8      | 21.398        | VV R | 0.0729      | 2.11830e4    | 3962.42065   | 97.6362 |
| 9      | 21.792        | VV E | 0.0642      | 25.06209     | 5.54760      | 0.1155  |
| 10     | 22.811        | VV R | 0.0705      | 30.99144     | 6.13338      | 0.1428  |
| 11     | 22.916        | VV   | 0.0519      | 8.87932      | 2.36049      | 0.0409  |
| 12     | 22.988        | VB   | 0.2403      | 63.67598     | 3.17738      | 0.2935  |

Totals : 2.16958e4 4051.06532

=====  
\*\*\* End of Report \*\*\*

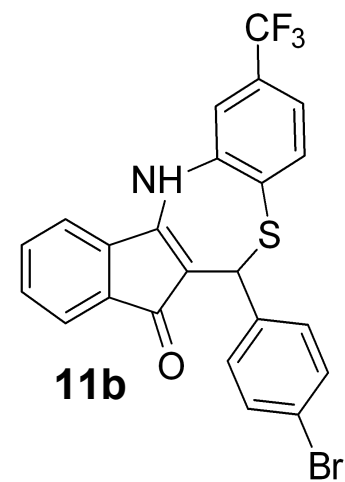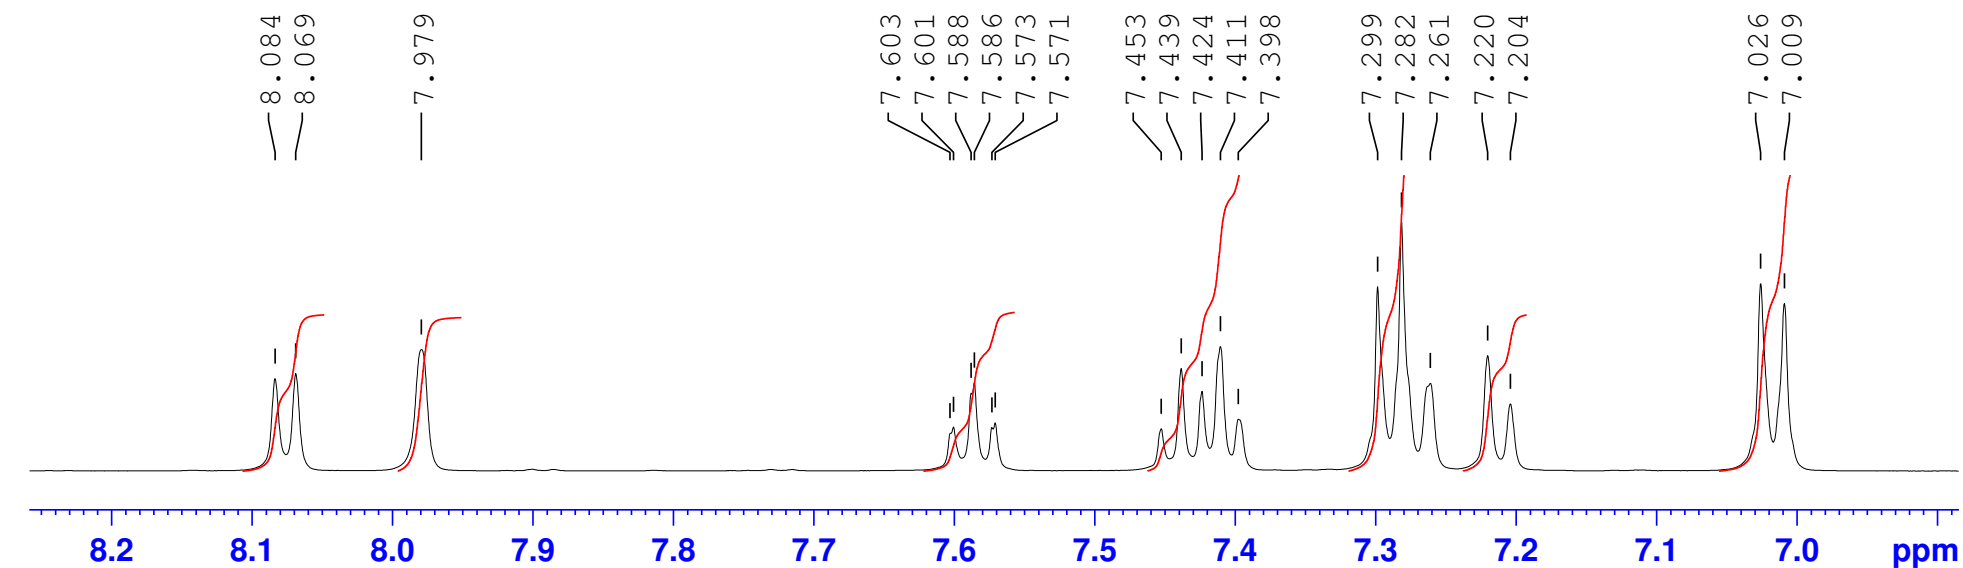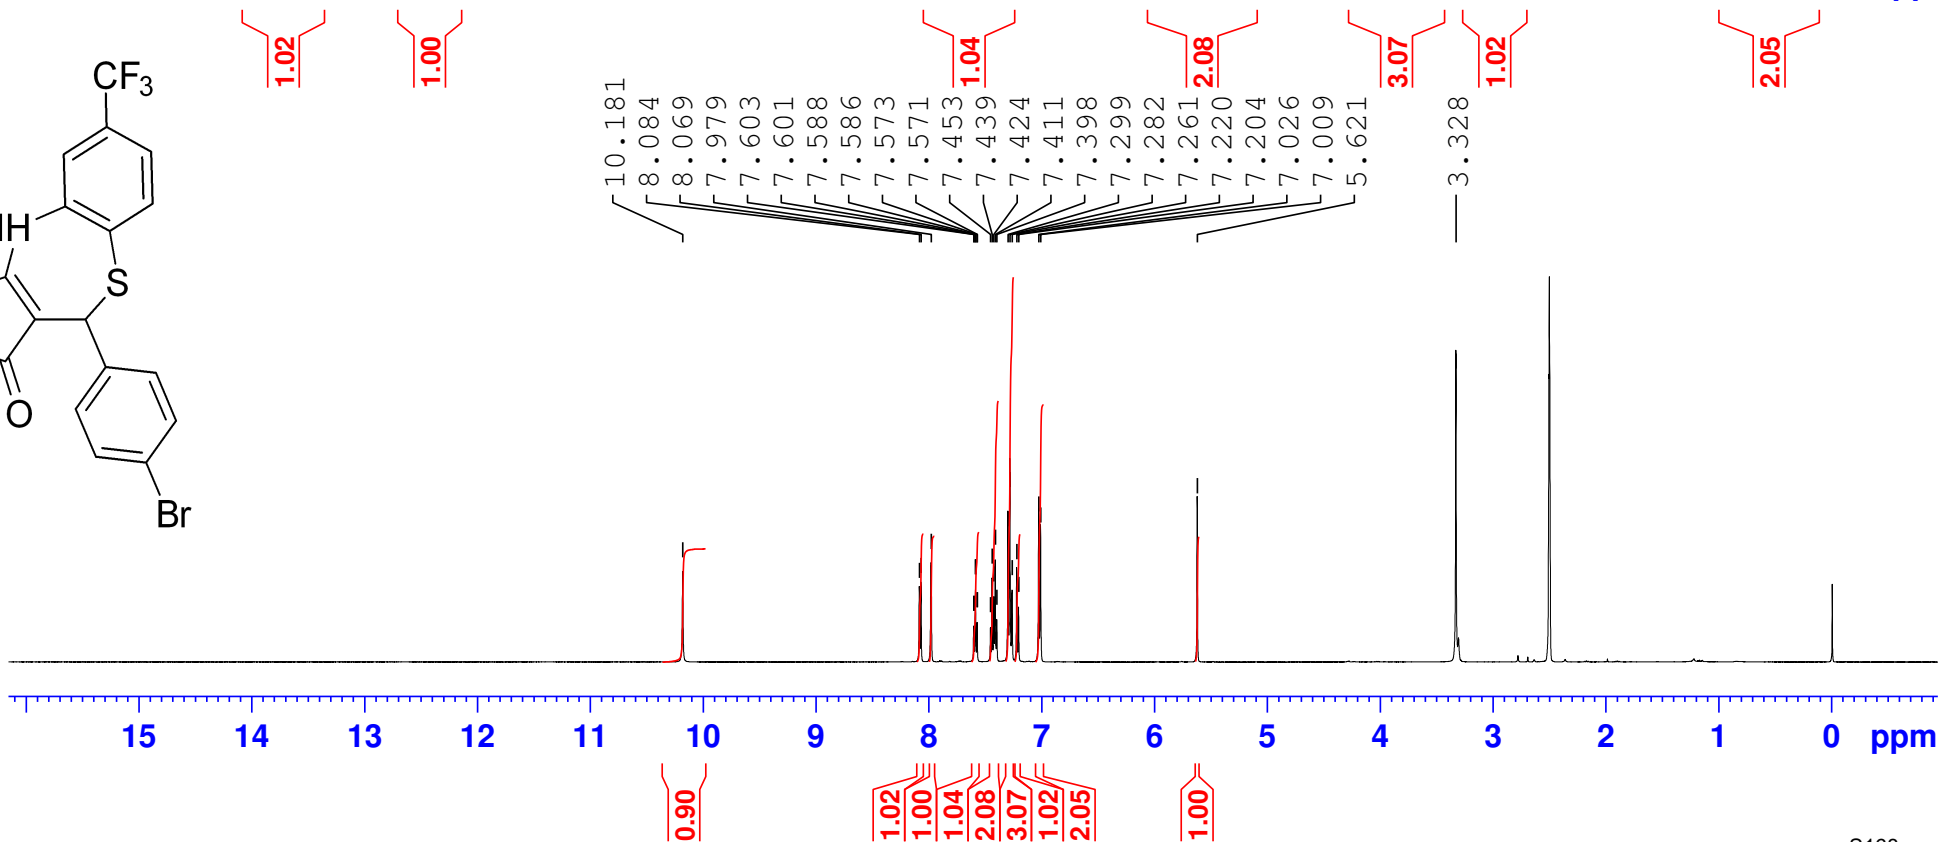



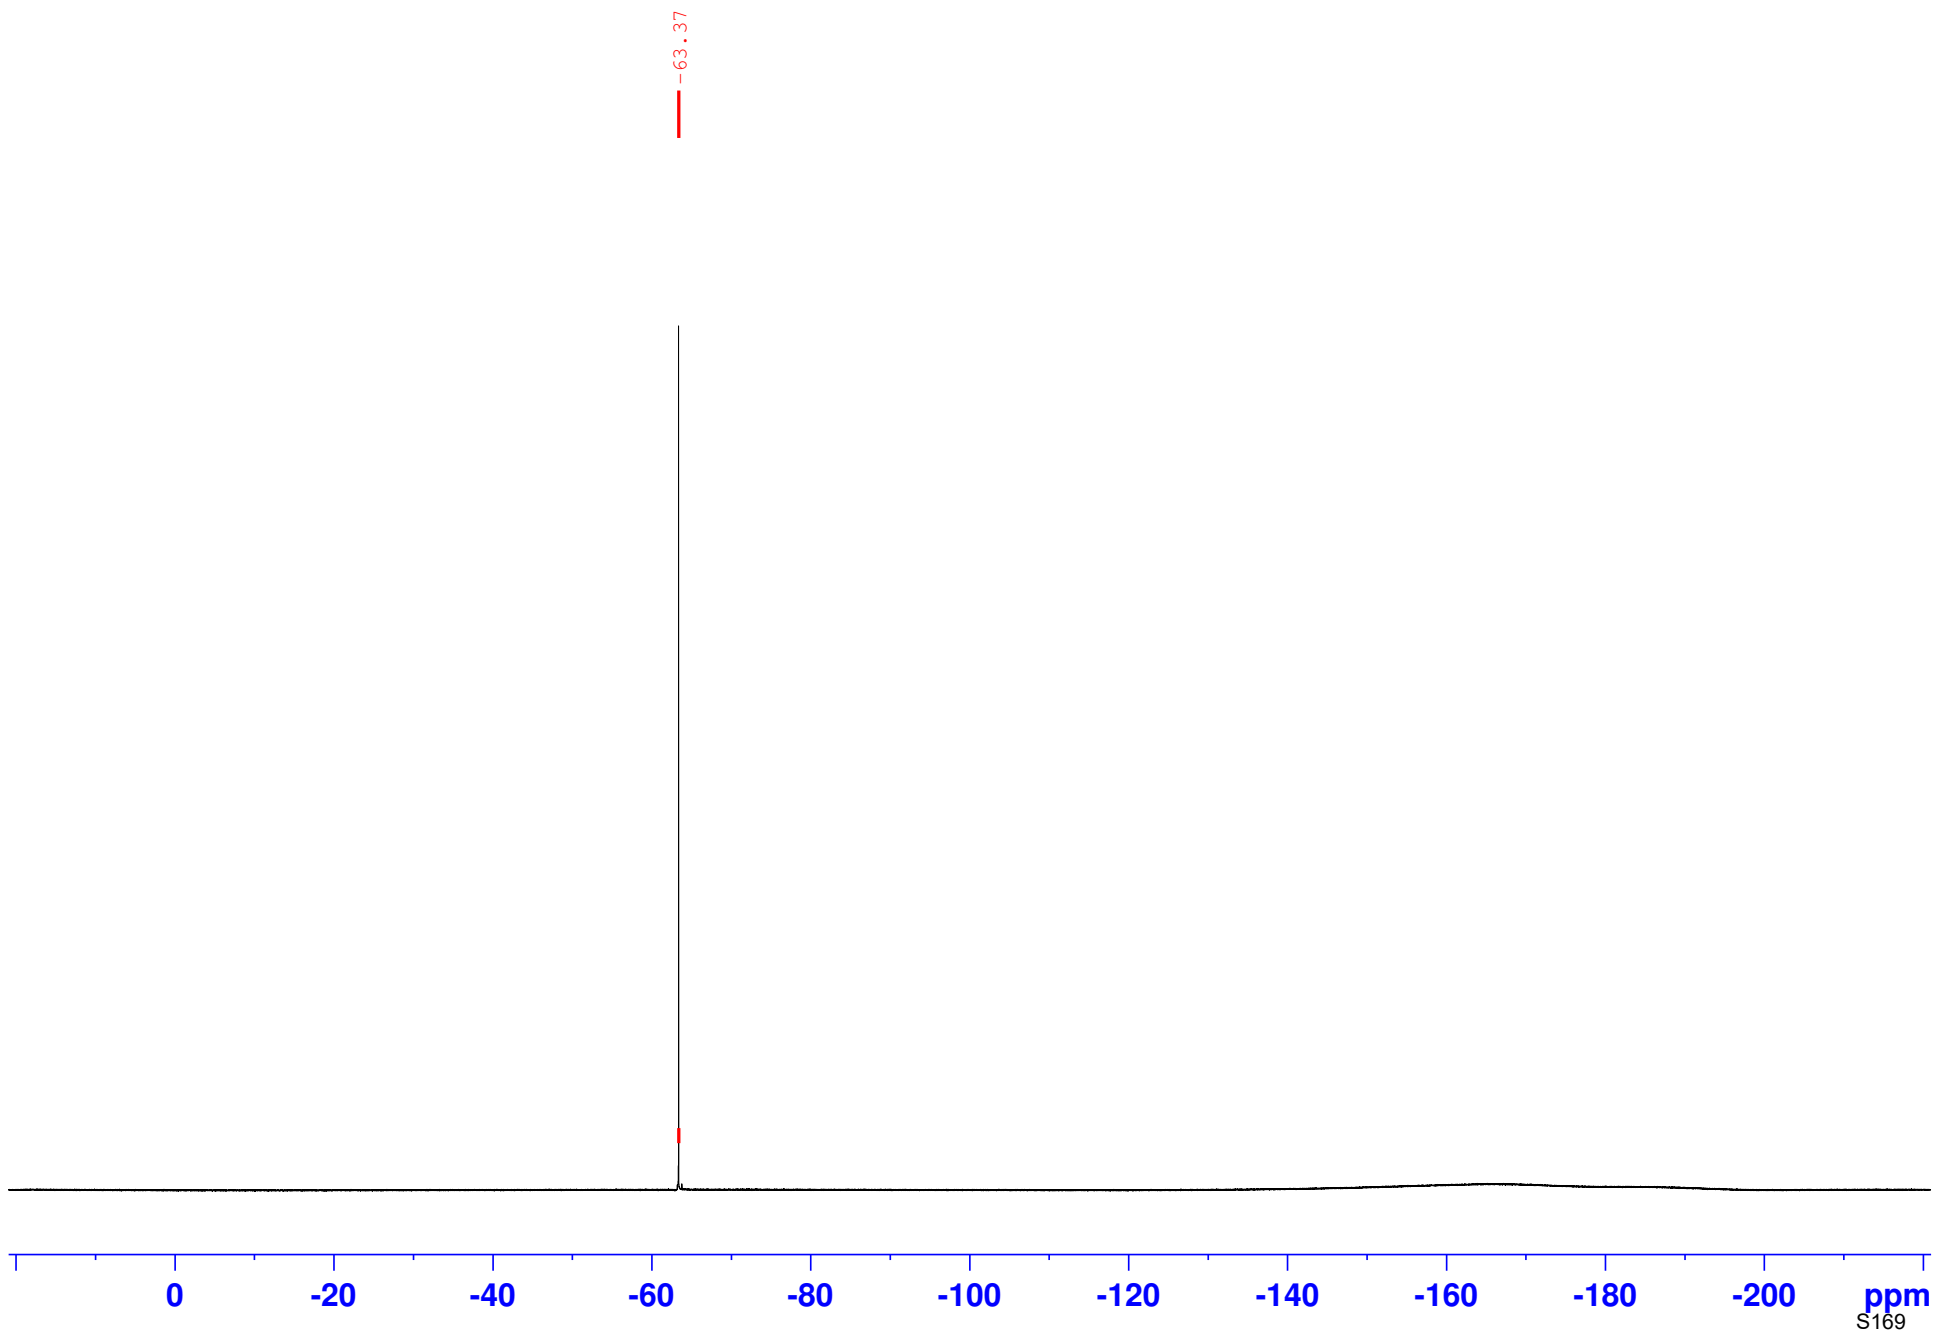

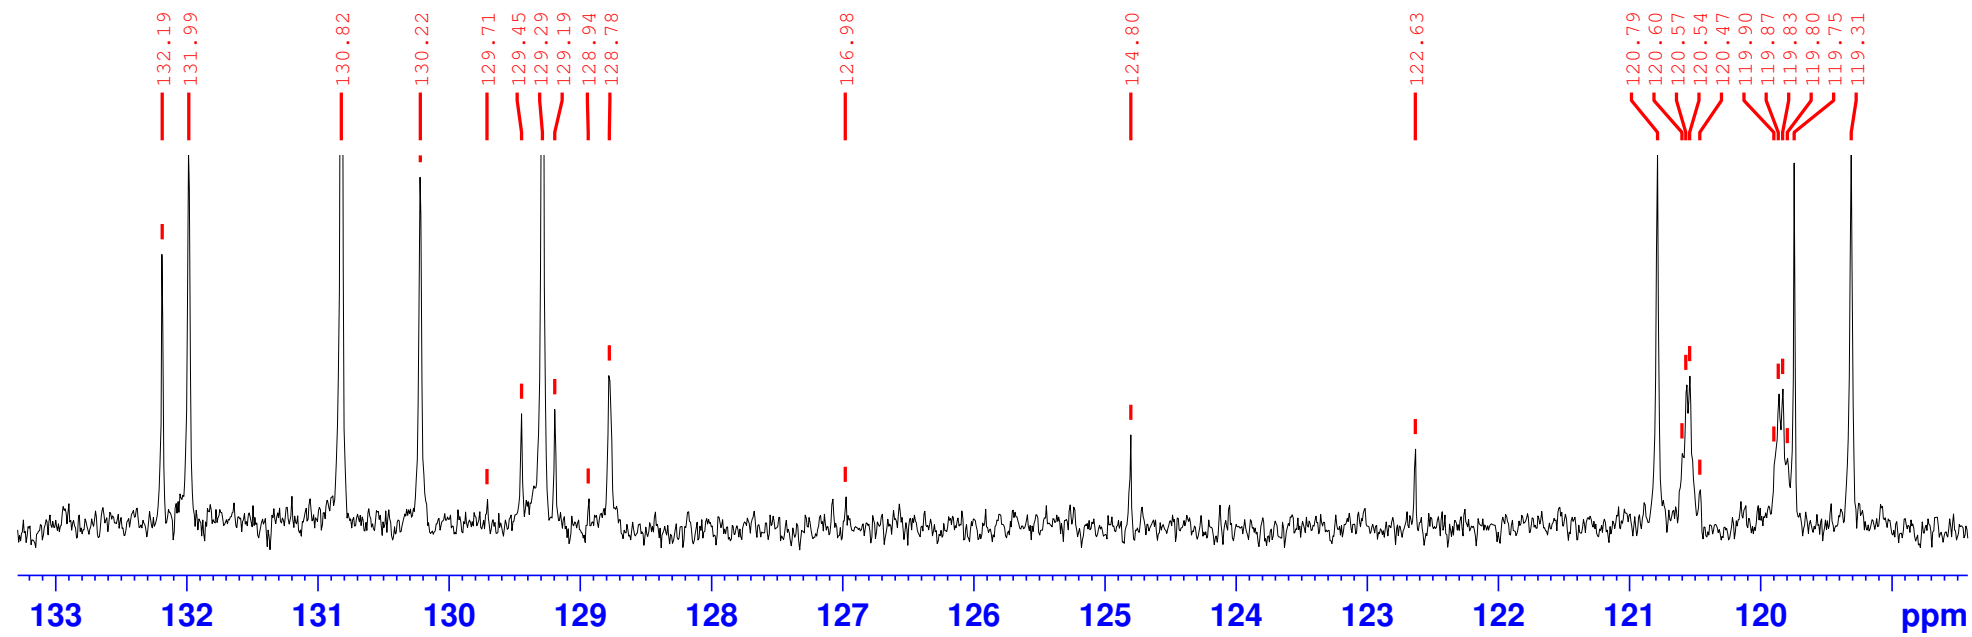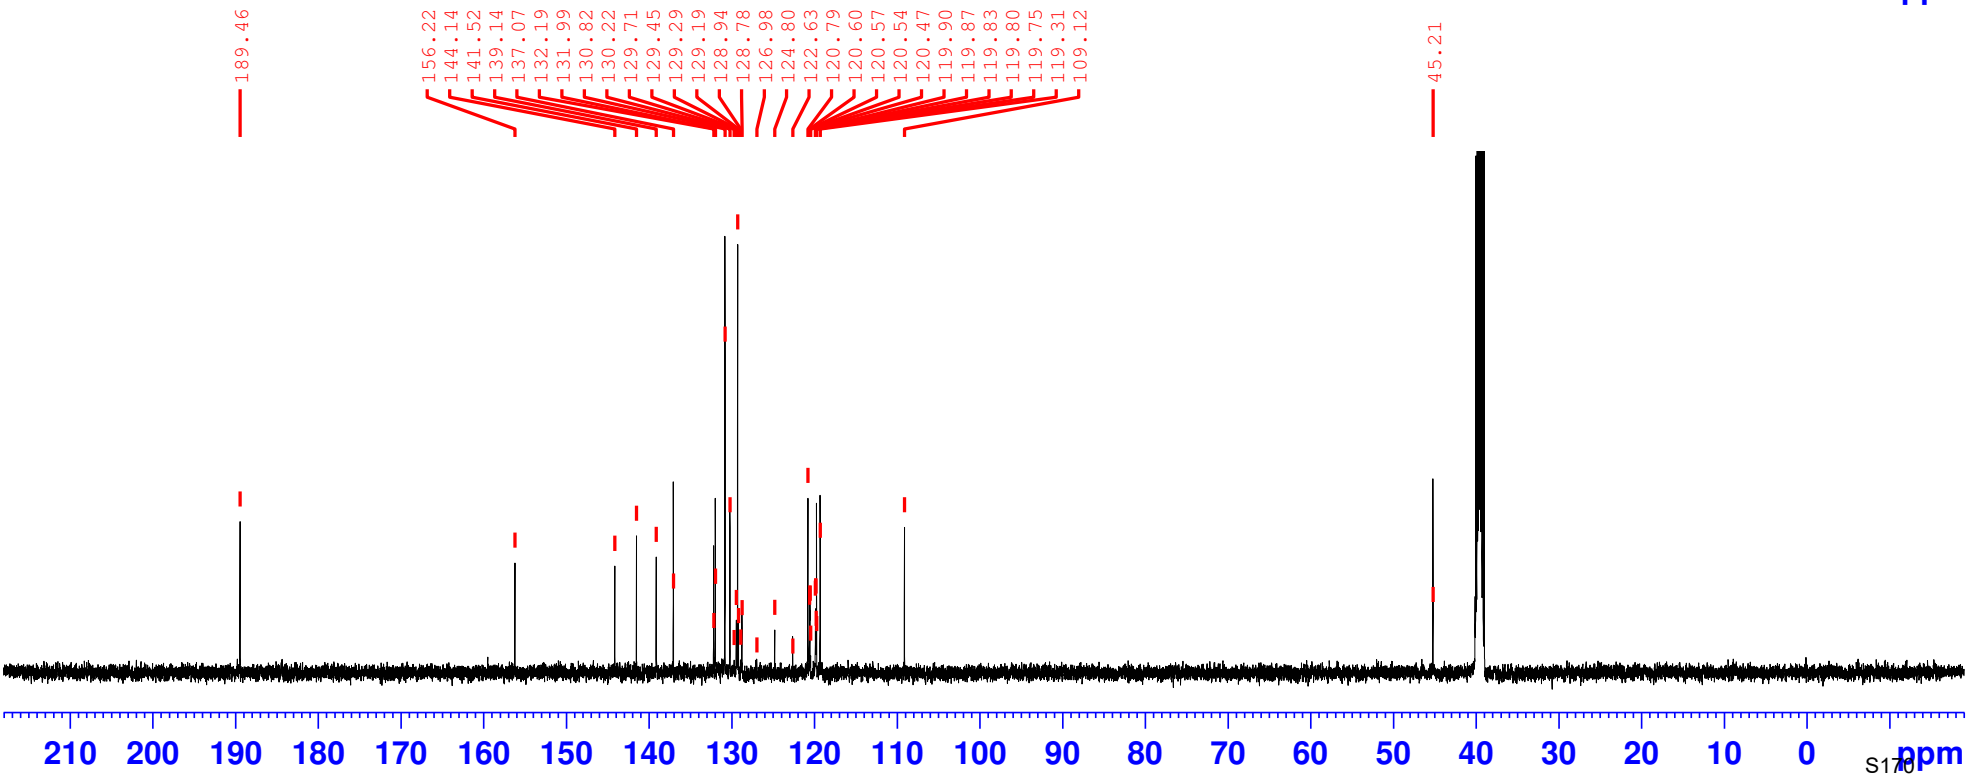

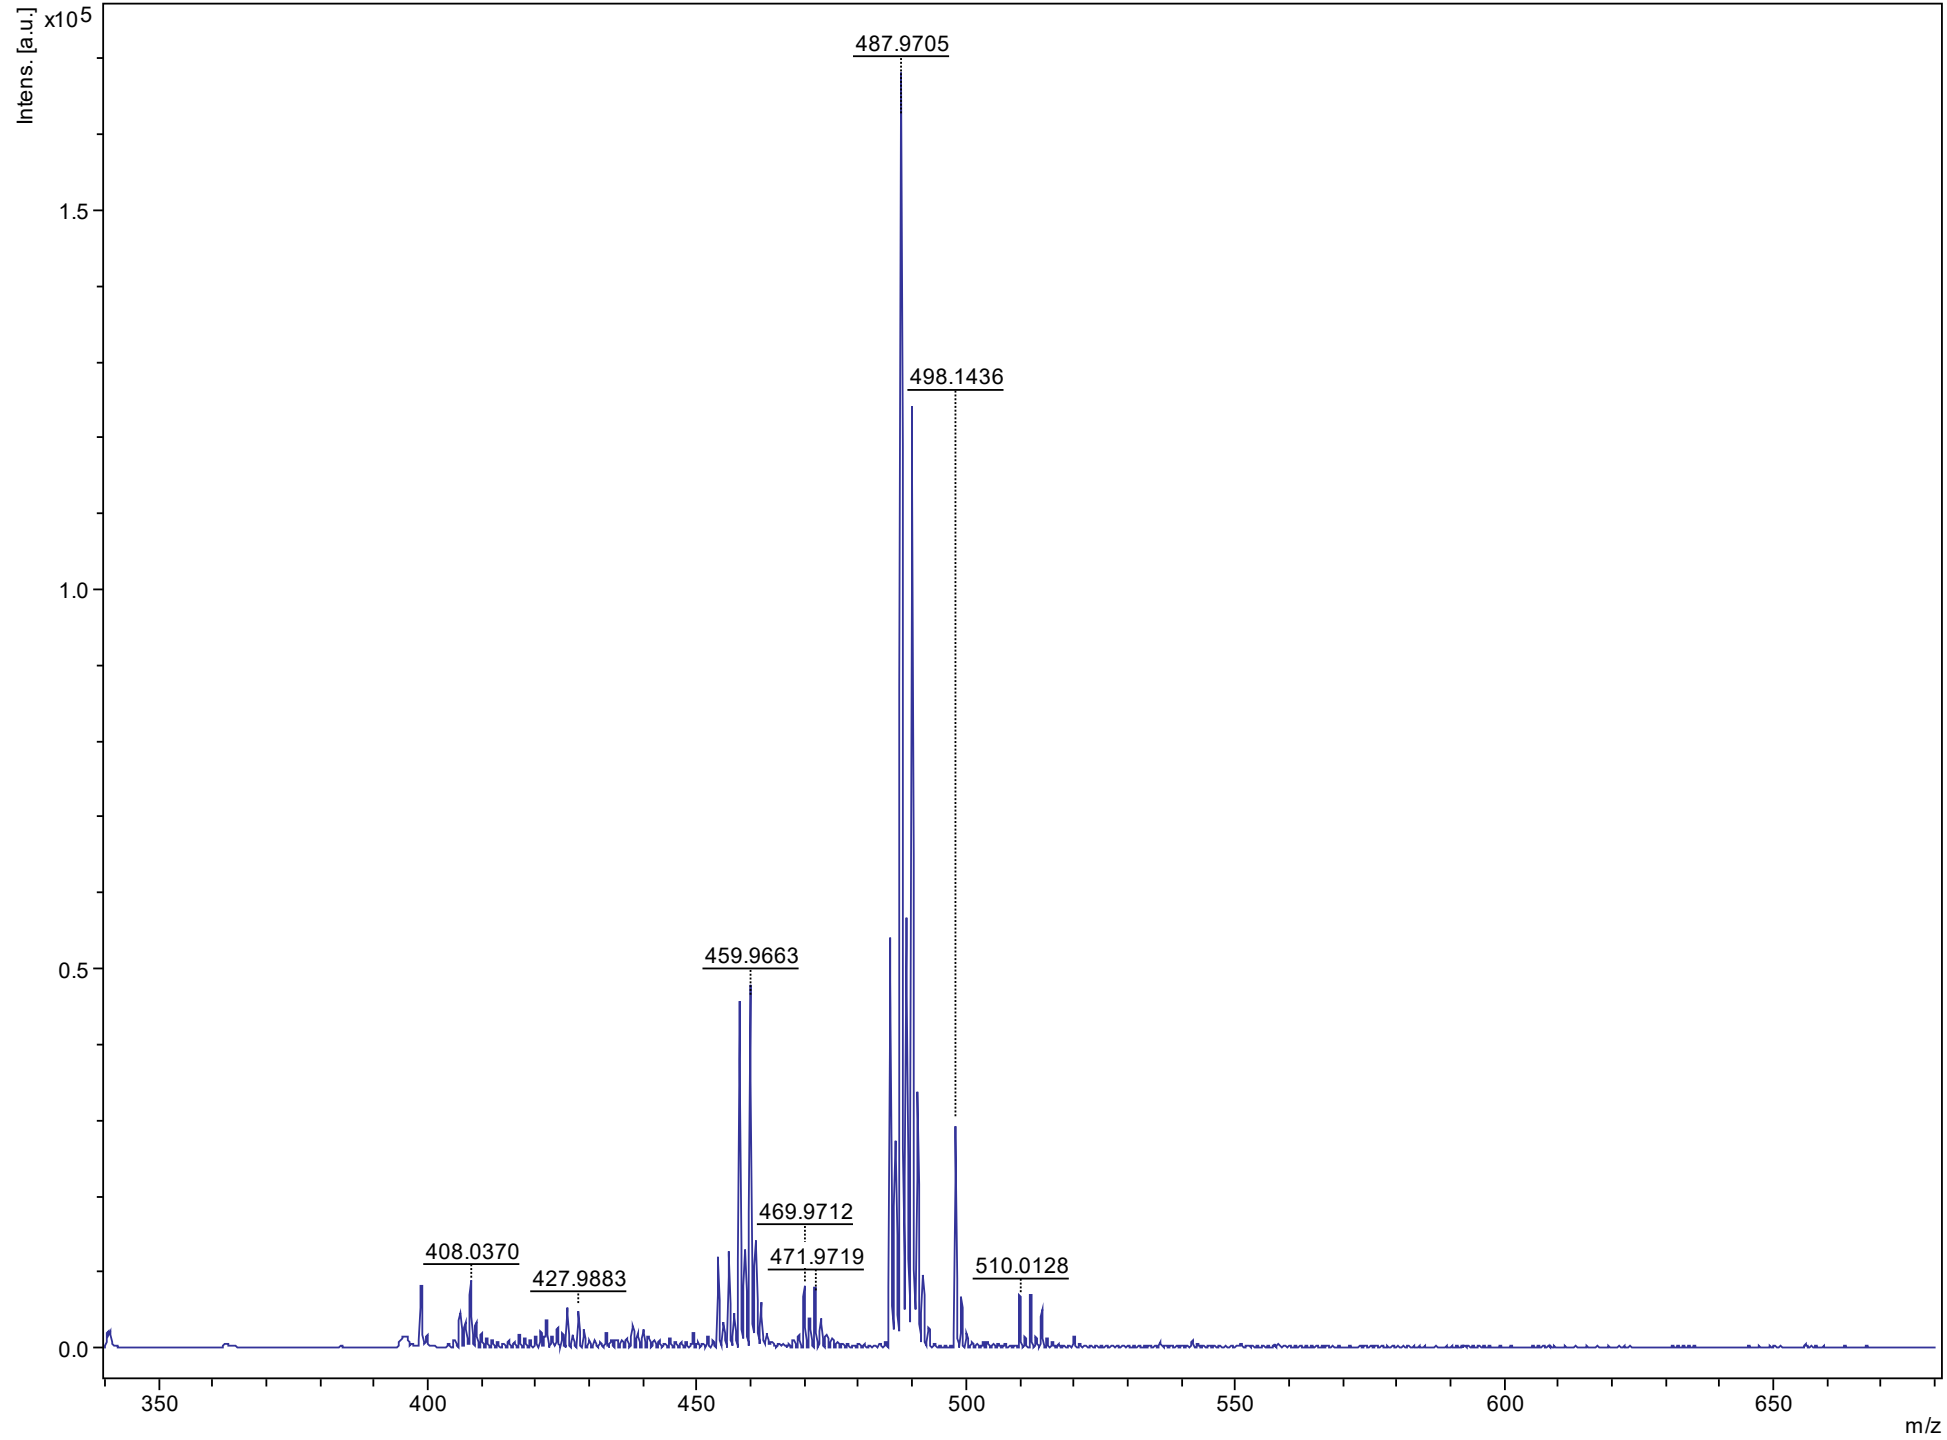

Sample Name: LJC1-77

```

=====
Acq. Operator   : SYSTEM                      Seq. Line :    7
Acq. Instrument : 1220 HPLC                   Location  :   15
Injection Date  : 10/10/2020 12:31:07 PM     Inj       :    1
                                           Inj Volume: 30.000 µl
Different Inj Volume from Sample Entry! Actual Inj Volume : 50.000 µl
Method          : C:\Chem32\1\Data\luana 2020-10-10 09-45-18\MOHAMED-SMALL MOLECULE.M (
                Sequence Method)
Last changed    : 10/10/2020 10:17:41 AM by SYSTEM
Method Info     : Water/MeOH

Sample Info     : LJC1-77

```

Additional Info : Peak(s) manually integrated

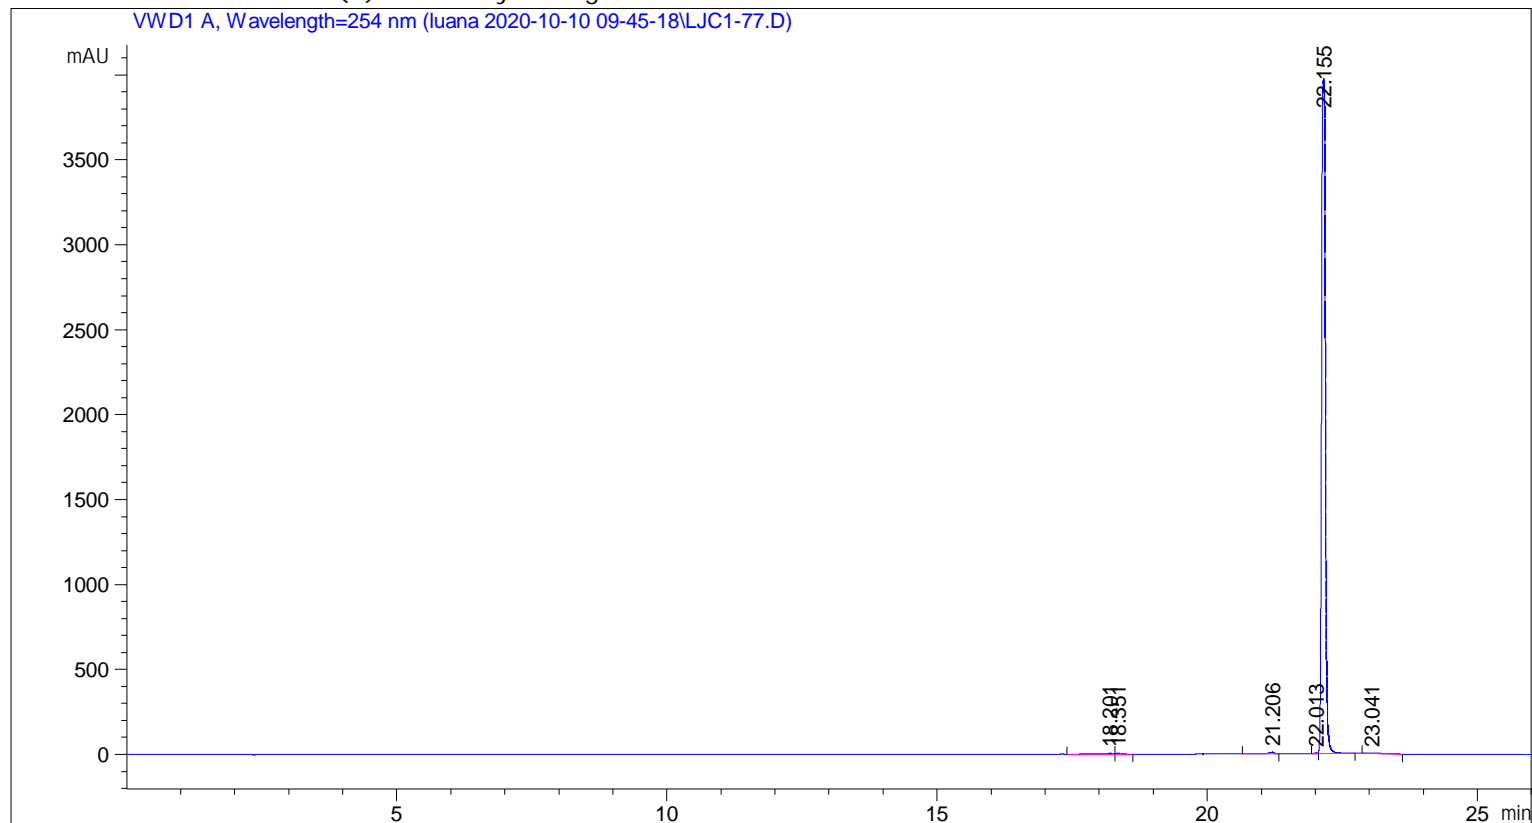

```

=====
                          Area Percent Report
=====

```

```

Sorted By           :      Signal
Multiplier          :      1.0000
Dilution            :      1.0000
Use Multiplier & Dilution Factor with ISTDs

```

Signal 1: VWD1 A, Wavelength=254 nm

| Peak # | RetTime [min] | Type | Width [min] | Area [mAU*s] | Height [mAU] | Area % |
|--------|---------------|------|-------------|--------------|--------------|--------|
| 1      | 18.201        | BV   | 0.2573      | 97.64452     | 4.44441      | 0.4965 |
| 2      | 18.351        | VB   | 0.1076      | 40.13965     | 4.87056      | 0.2041 |
| 3      | 21.206        | VB R | 0.1084      | 84.85110     | 10.21556     | 0.4315 |
| 4      | 22.013        | BV E | 0.0524      | 20.70164     | 5.98061      | 0.1053 |

| Peak # | RetTime [min] | Type | Width [min] | Area [mAU*s] | Height [mAU] | Area %  |
|--------|---------------|------|-------------|--------------|--------------|---------|
| 5      | 22.155        | VV R | 0.0585      | 1.93762e4    | 3968.03247   | 98.5324 |
| 6      | 23.041        | VB R | 0.1424      | 45.25863     | 4.00457      | 0.2301  |

Totals : 1.96648e4 3997.54817

=====  
\*\*\* End of Report \*\*\*

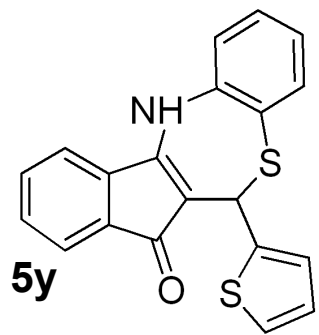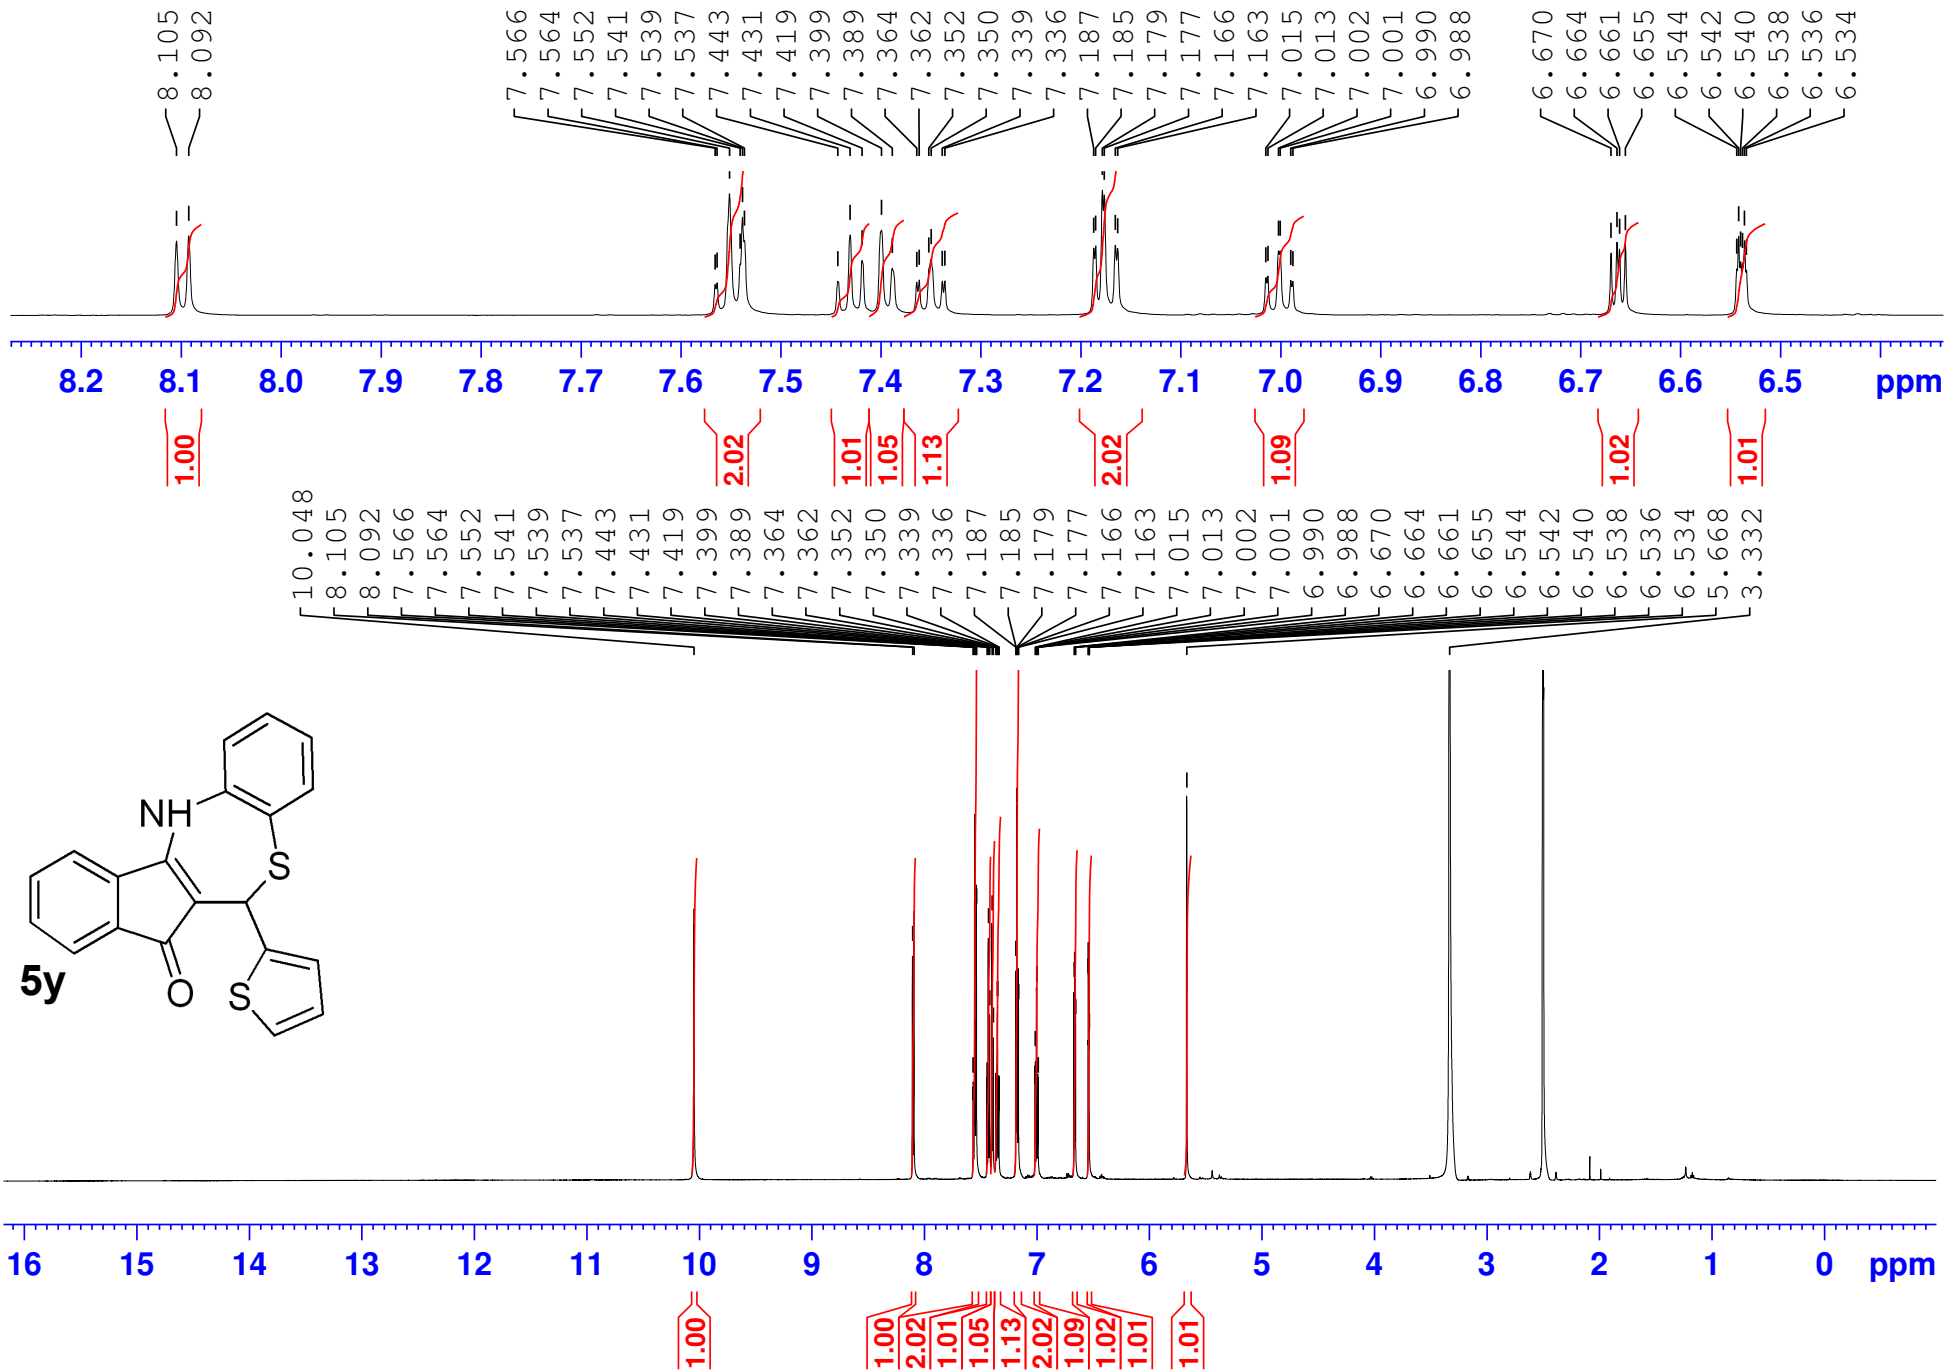

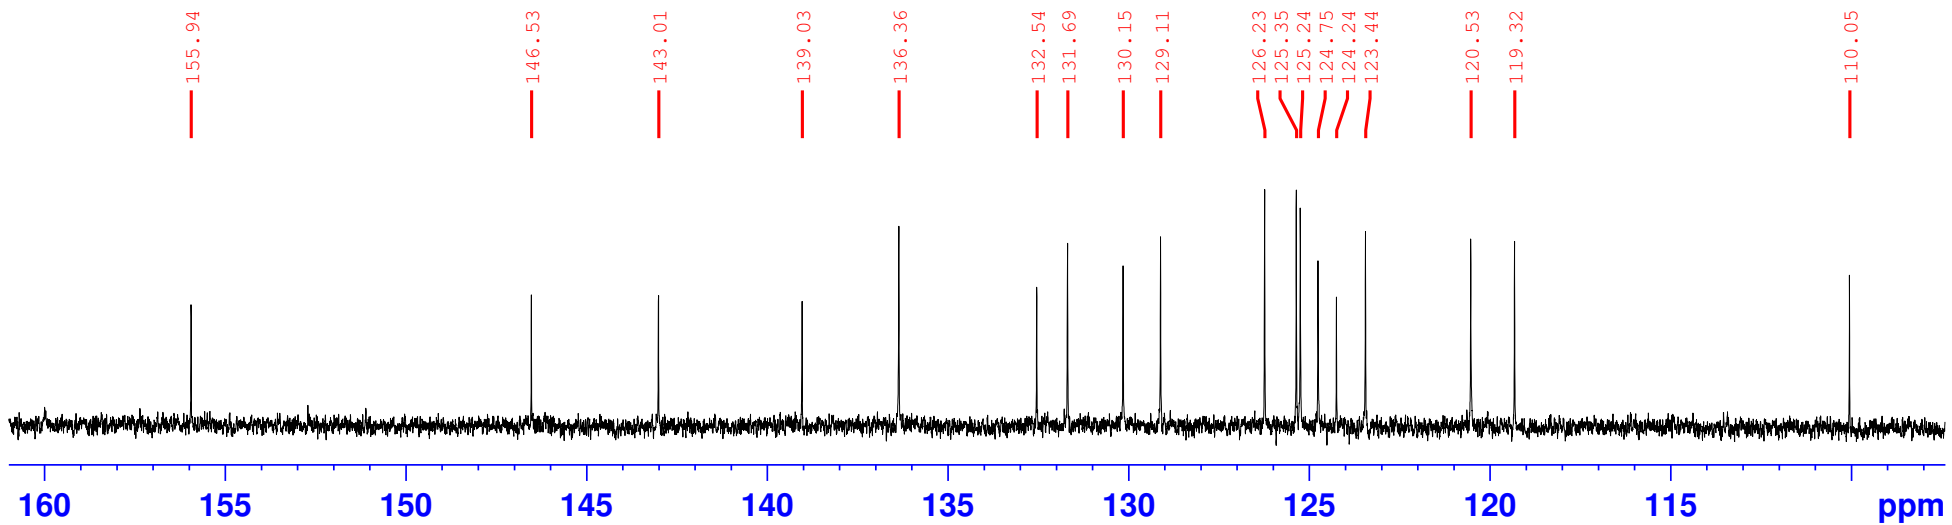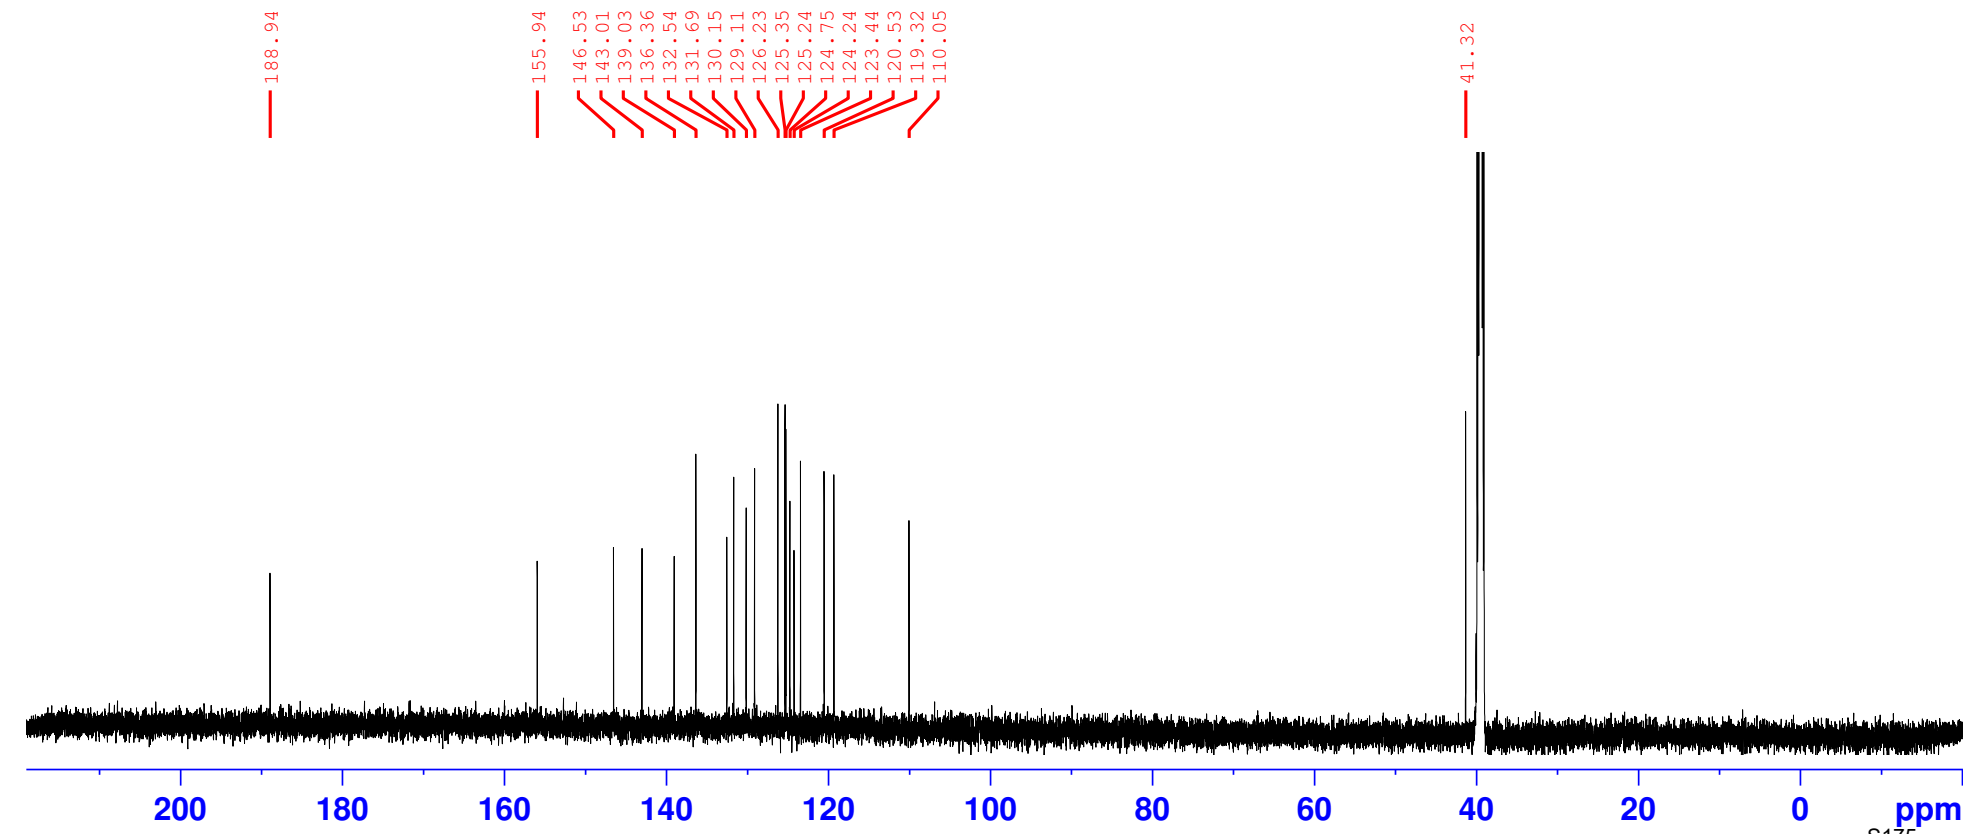

MAS-1-86 83 (1.395) Cm (3:120)

Scan ES+  
1.50e7

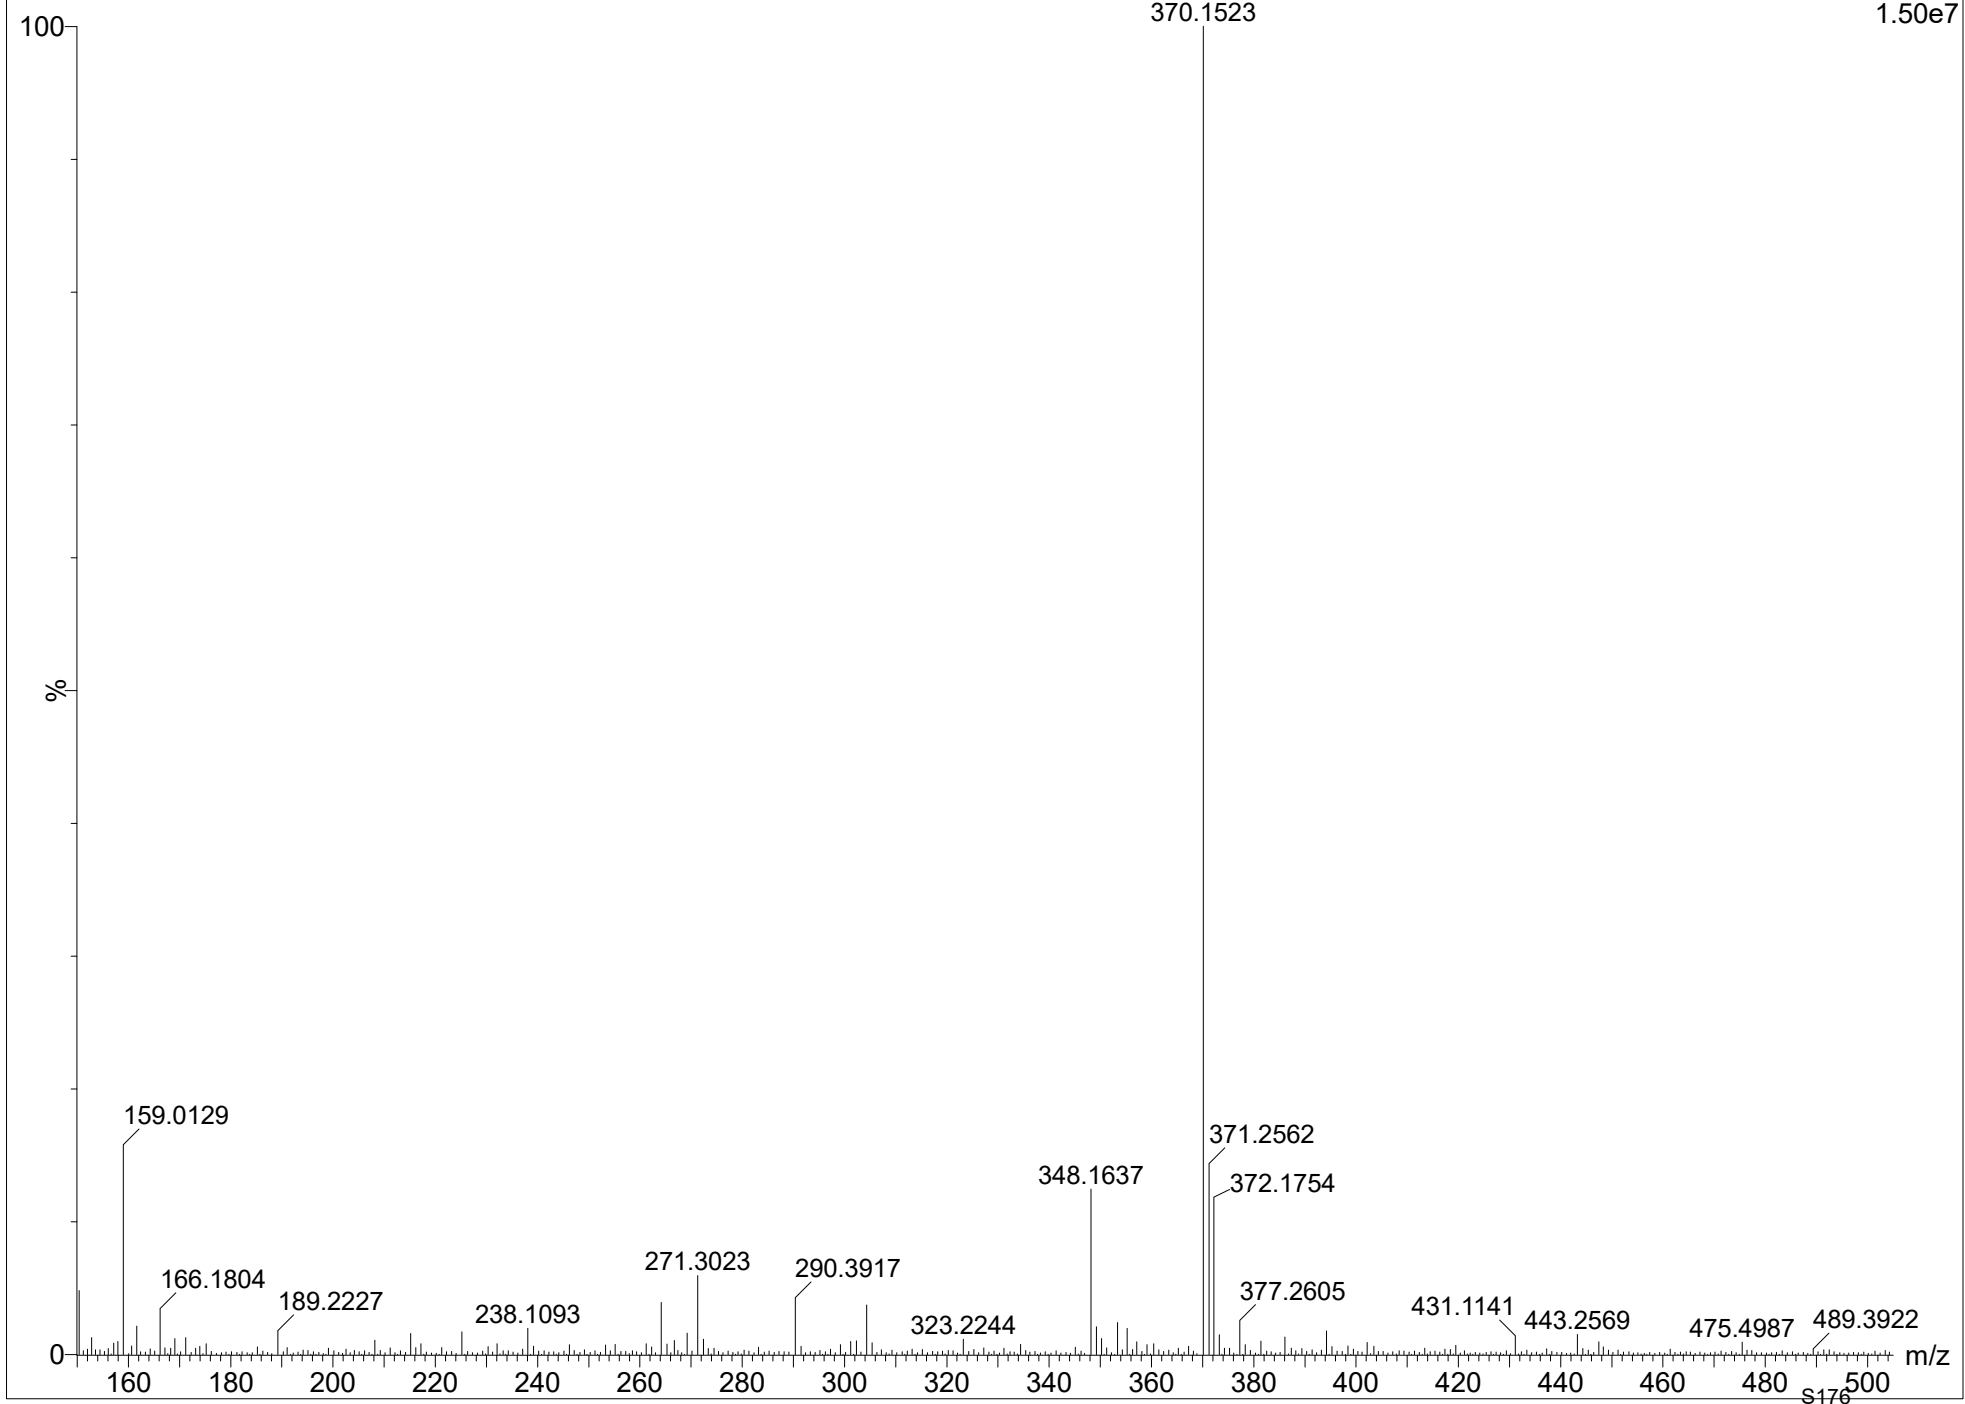



Sample Name: MAS 1-86

```

=====
Acq. Operator   : SYSTEM                      Seq. Line :    5
Acq. Instrument : 1220 HPLC                    Location  :   67
Injection Date  : 9/2/2021 11:20:56 AM      Inj       :    1
                                           Inj Volume: 50.000 µl

Acq. Method    : C:\Chem32\1\Data\luana 2021-09-02 09-40-26\Luana_small_molecule.M
Last changed   : 9/2/2021 10:12:00 AM by SYSTEM
Analysis Method: C:\Chem32\1\Data\luana 2021-09-02 09-40-26\Luana_small_molecule.M (Sequence
Method)
Last changed   : 9/2/2021 10:25:25 AM by SYSTEM
Method Info    : MeOH/water

Sample Info    : MAS 1-86

```

Additional Info : Peak(s) manually integrated

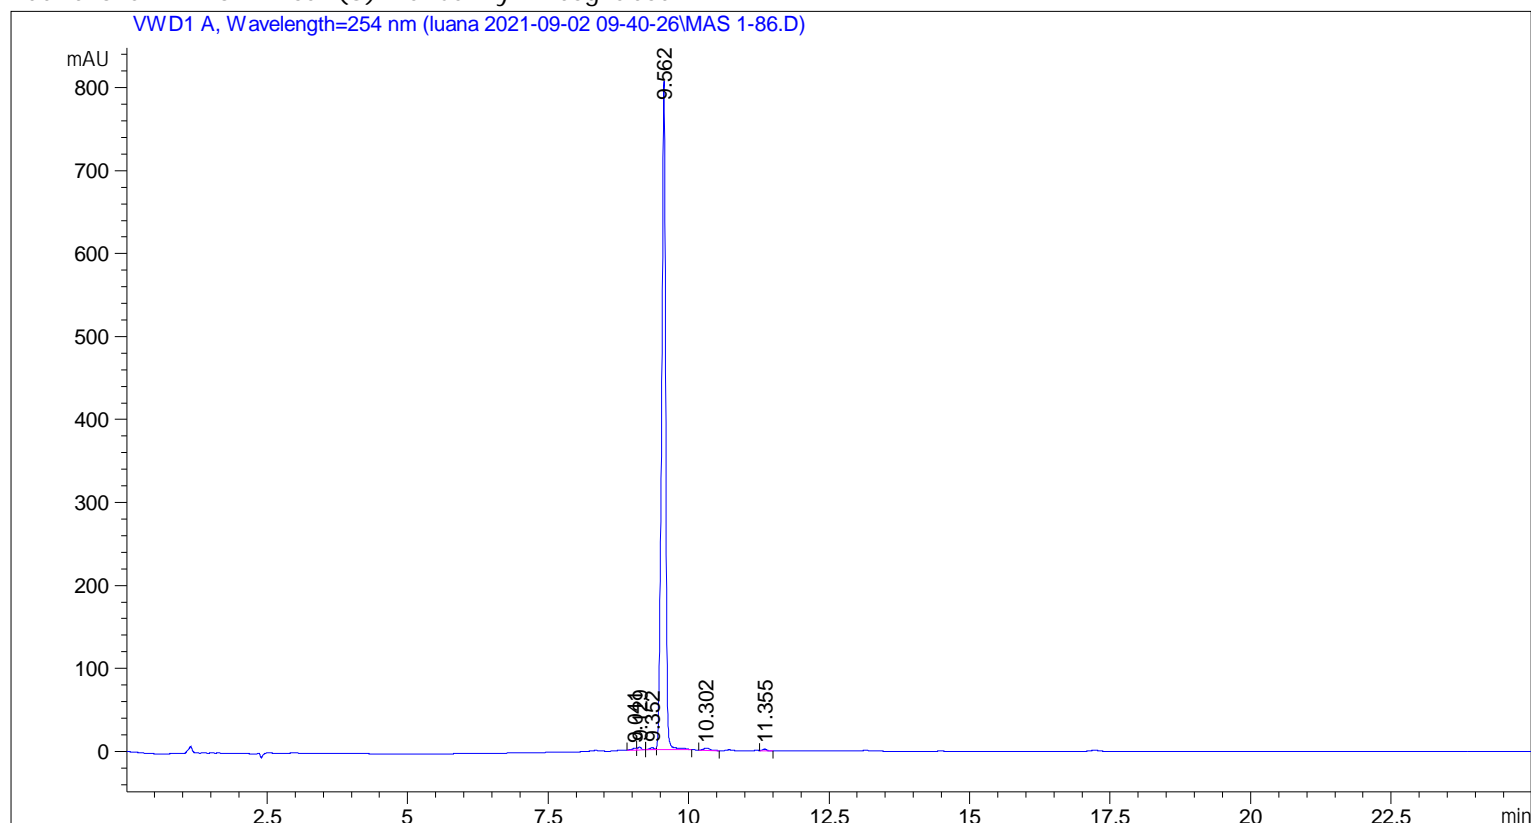

```

=====
                          Area Percent Report
=====

```

```

Sorted By      :      Signal
Multiplier     :      1.0000
Dilution       :      1.0000
Use Multiplier & Dilution Factor with ISTDs

```

Signal 1: VWD1 A, Wavelength=254 nm

| Peak # | RetTime [min] | Type | Width [min] | Area [mAU*s] | Height [mAU] | Area % |
|--------|---------------|------|-------------|--------------|--------------|--------|
| 1      | 9.041         | BV   | 0.0704      | 10.51690     | 2.17390      | 0.2579 |
| 2      | 9.129         | VB   | 0.0662      | 14.83191     | 3.31304      | 0.3637 |
| 3      | 9.352         | BV E | 0.0740      | 13.16839     | 2.55932      | 0.3229 |

| Peak # | RetTime [min] | Type | Width [min] | Area [mAU*s] | Height [mAU] | Area %  |
|--------|---------------|------|-------------|--------------|--------------|---------|
| 4      | 9.562         | VV R | 0.0730      | 4008.14185   | 806.80585    | 98.2792 |
| 5      | 10.302        | BB   | 0.1155      | 20.46943     | 2.35254      | 0.5019  |
| 6      | 11.355        | VB   | 0.0780      | 11.19344     | 2.17644      | 0.2745  |

Totals :                                   4078.32192   819.38109

=====  
\*\*\* End of Report \*\*\*

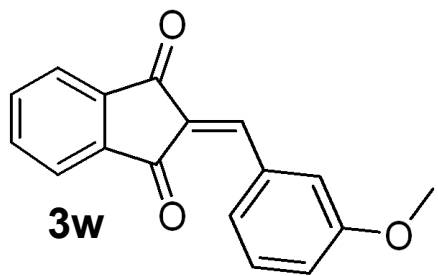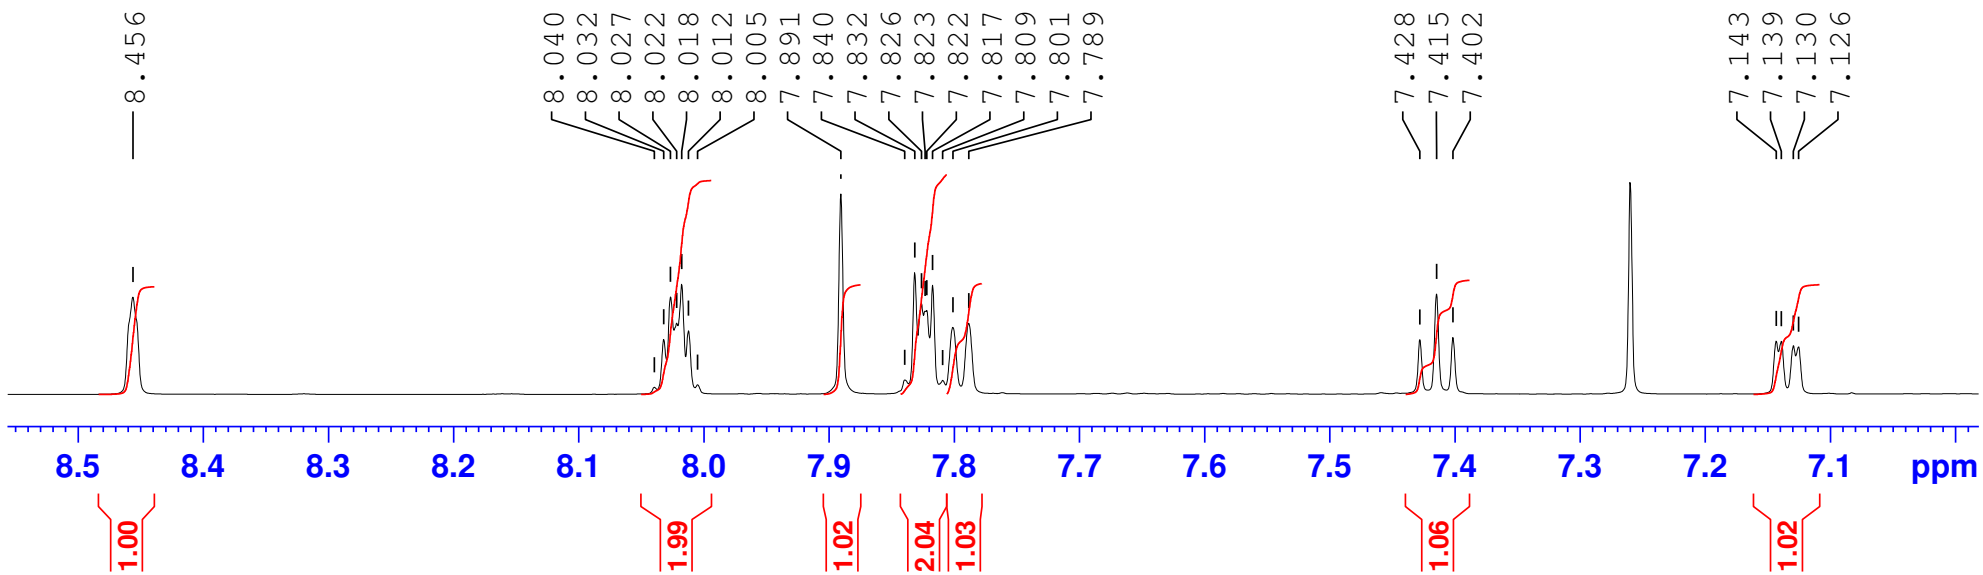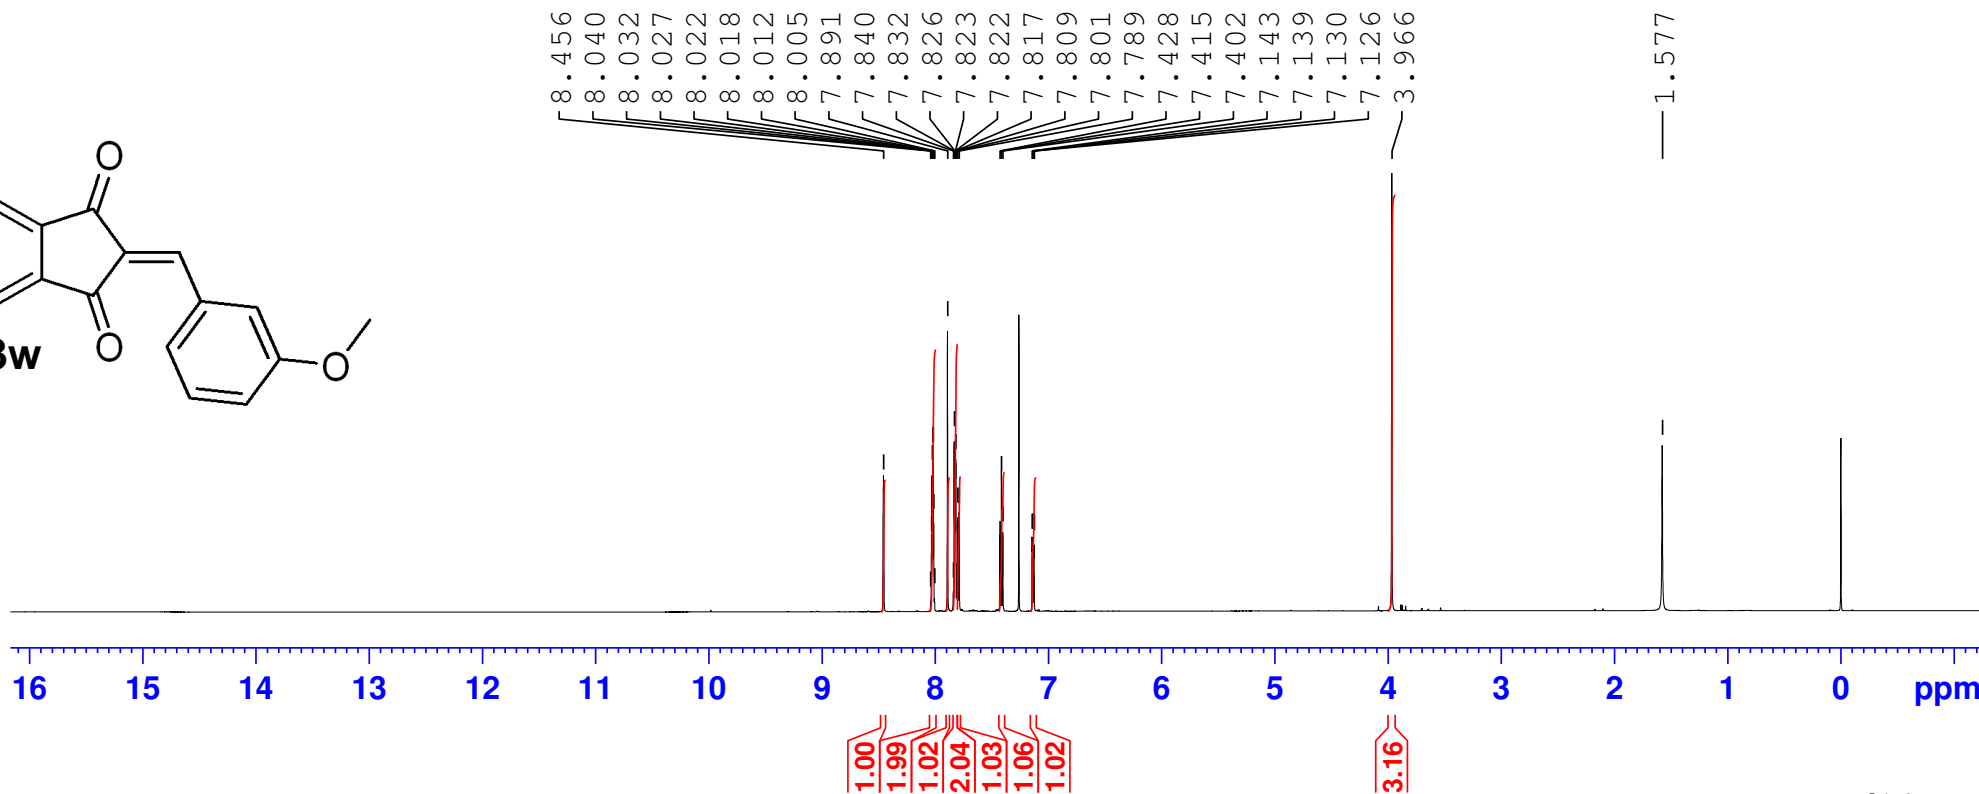

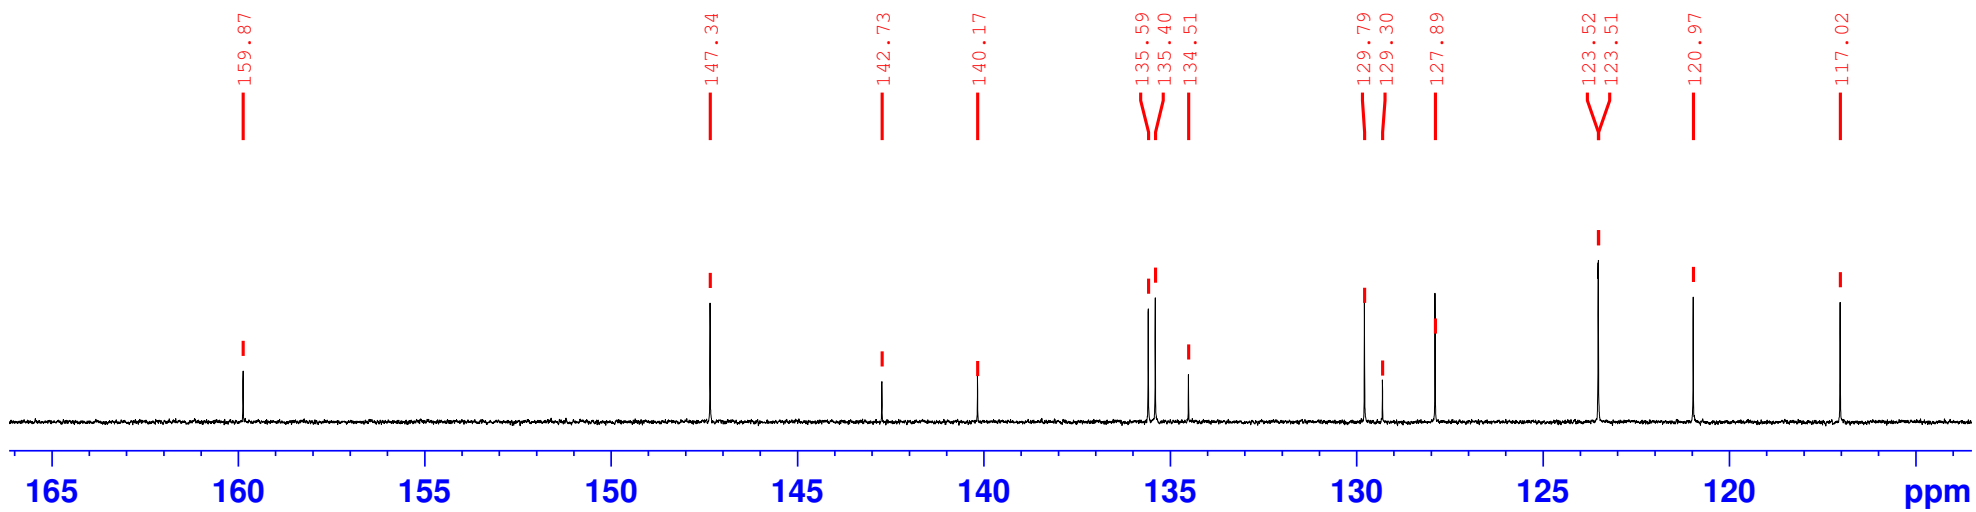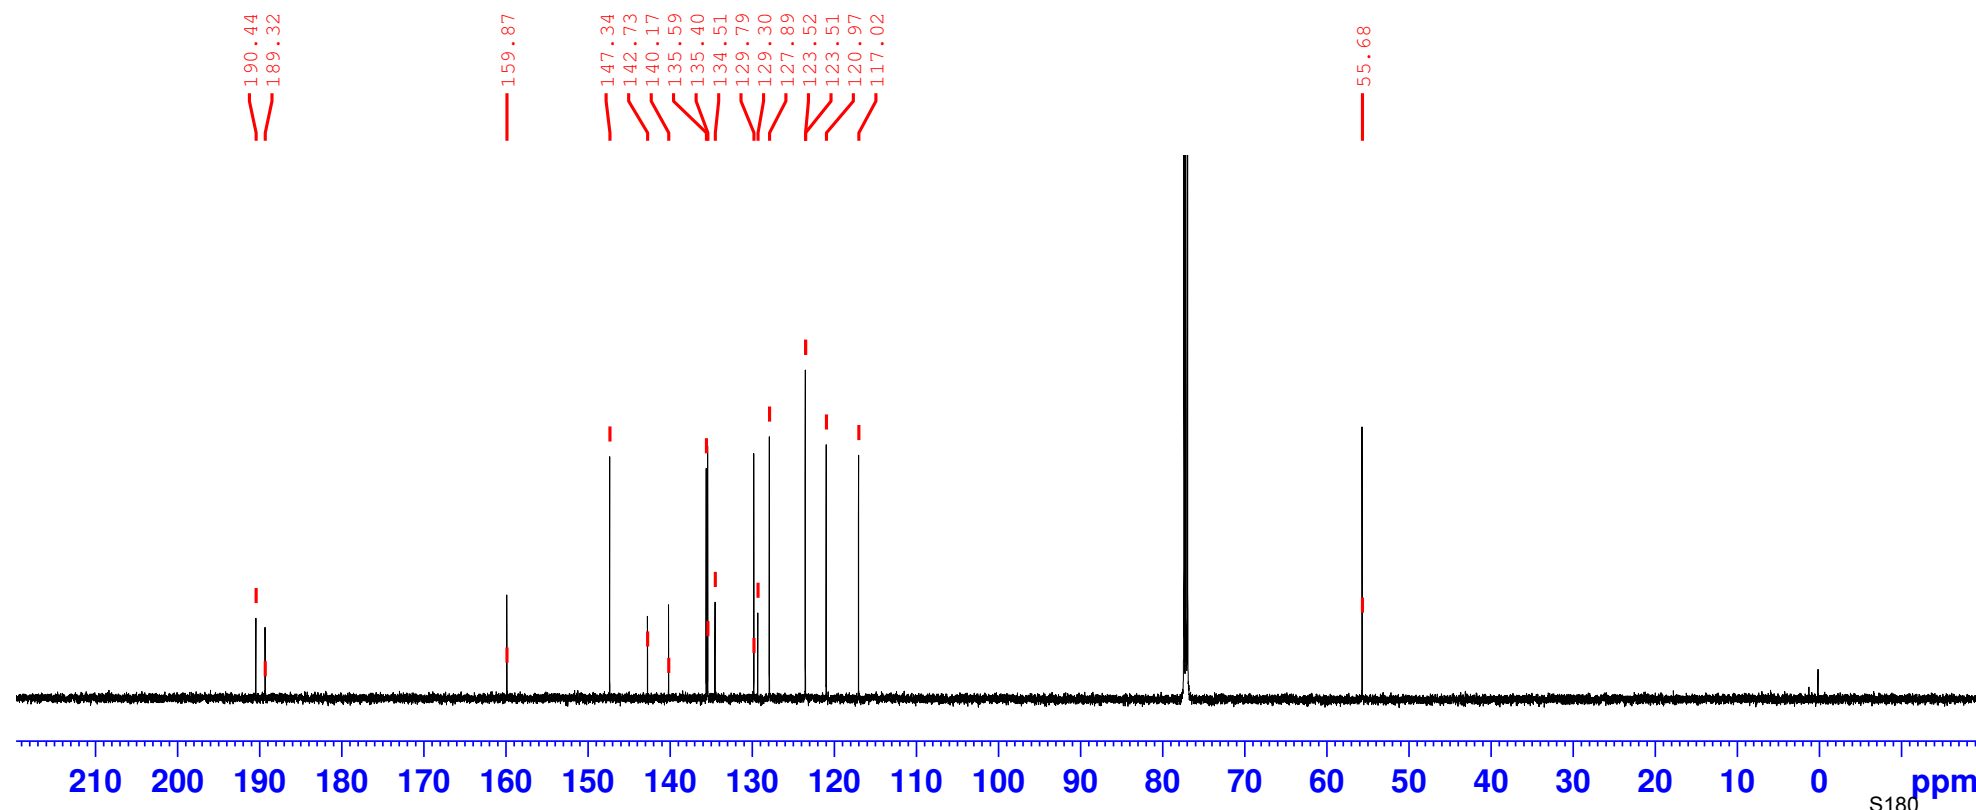

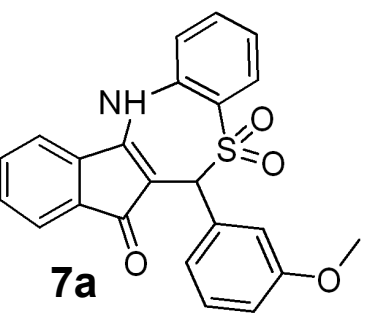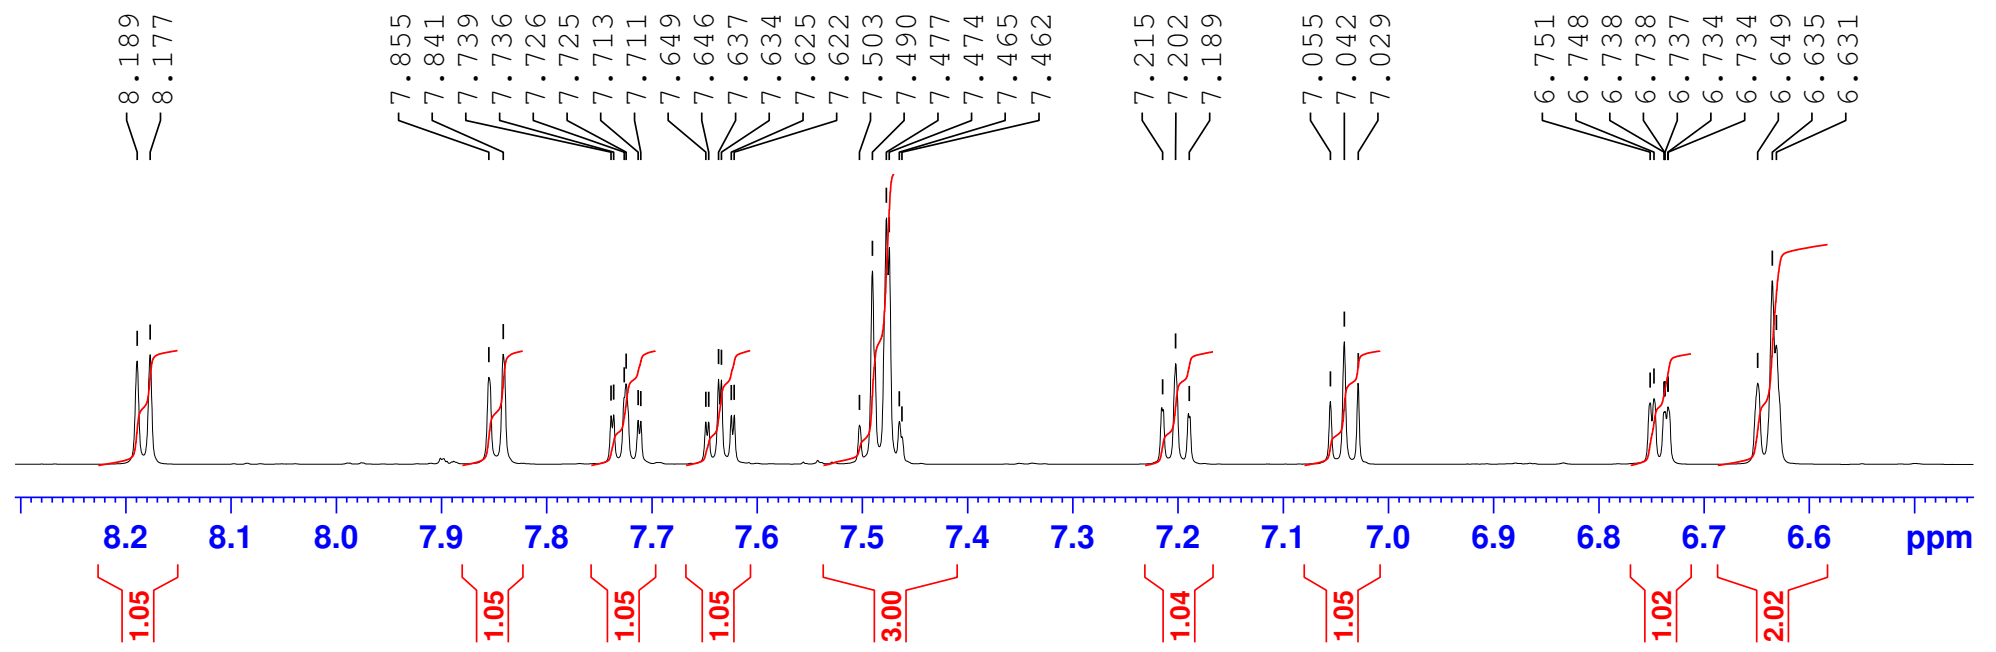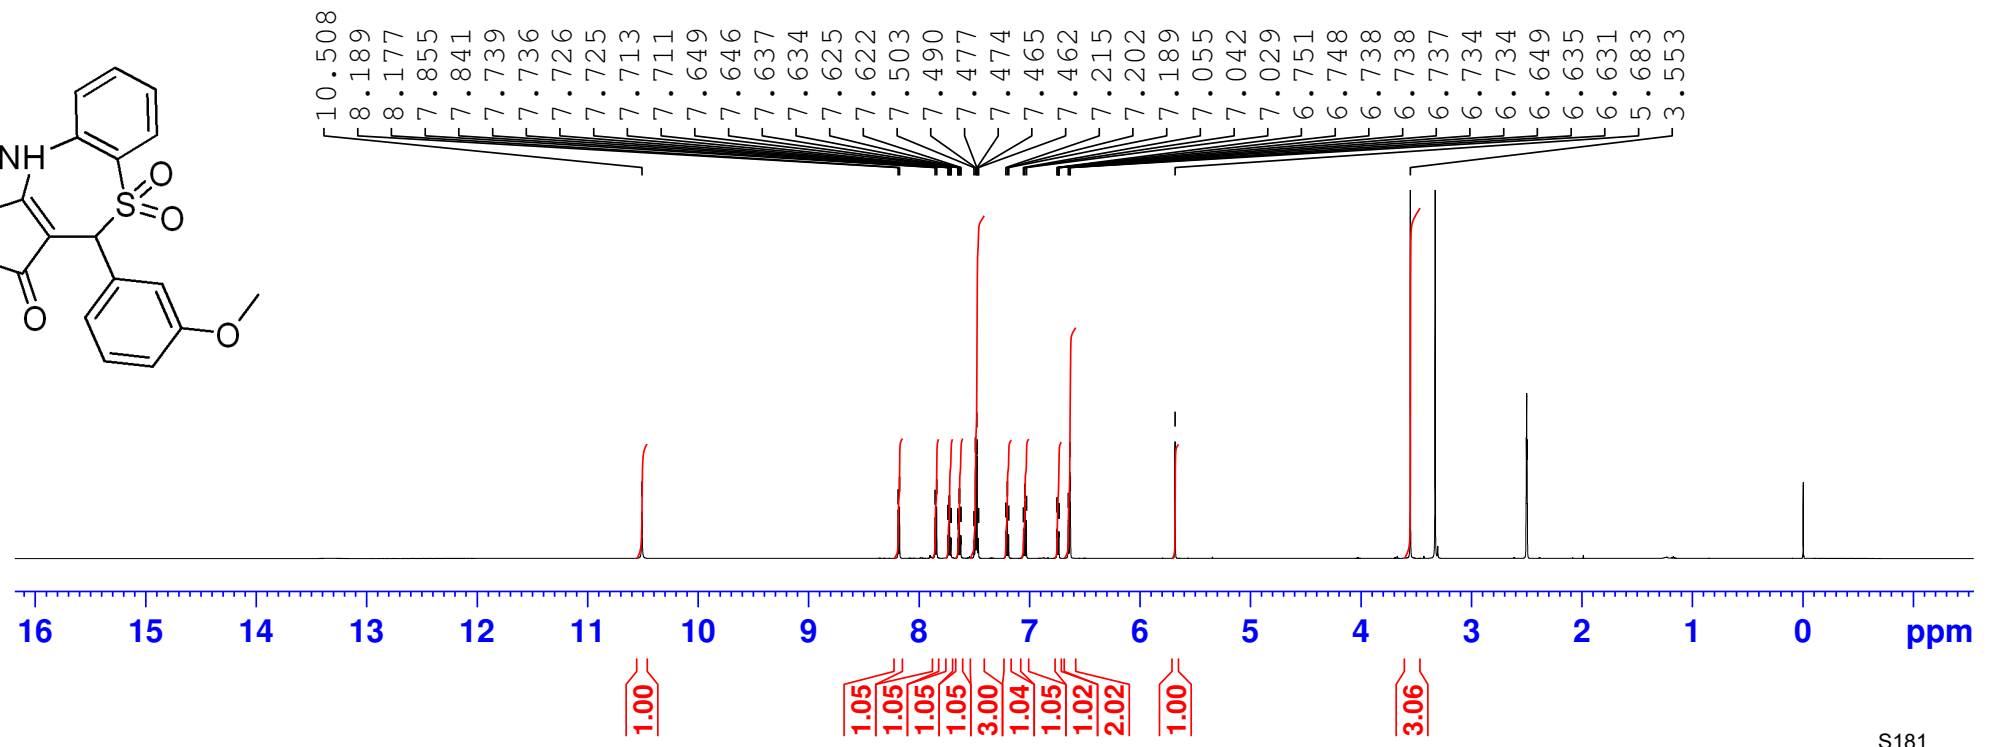

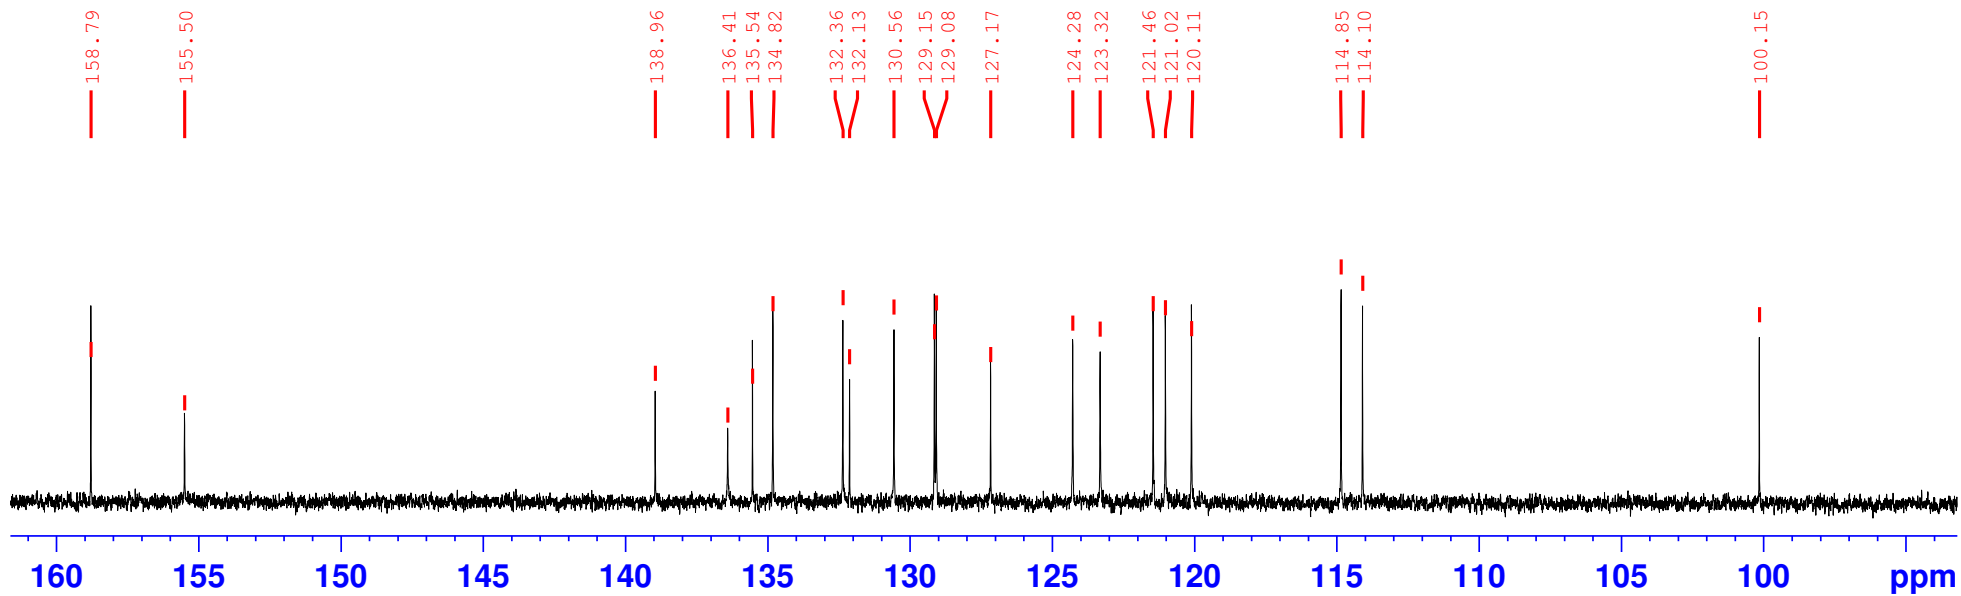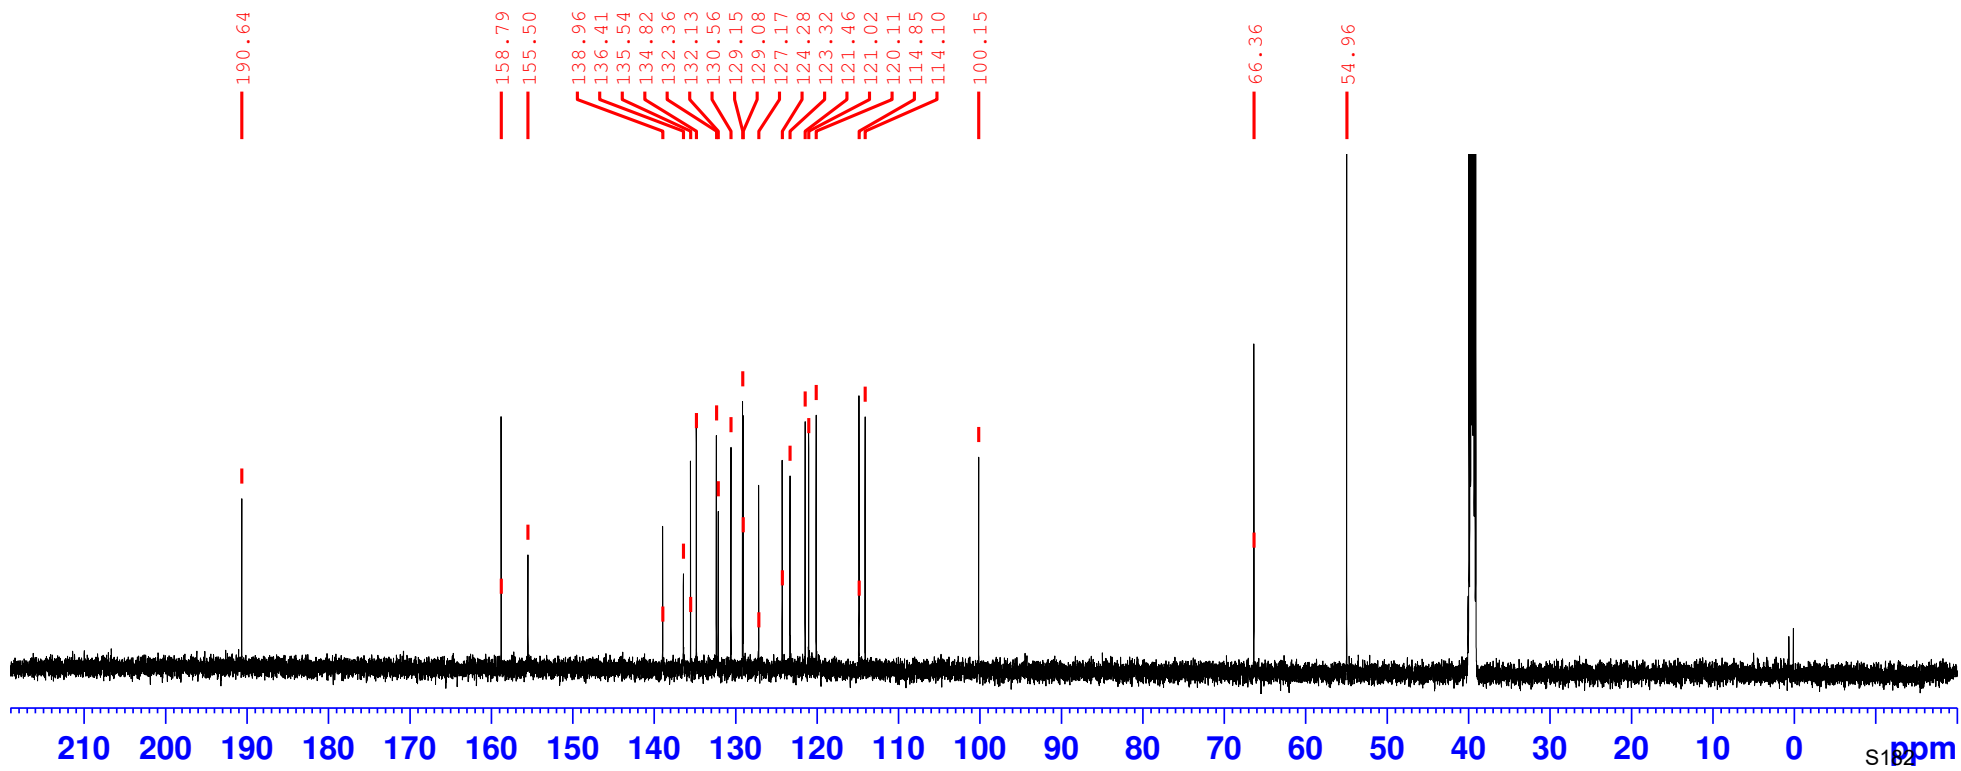

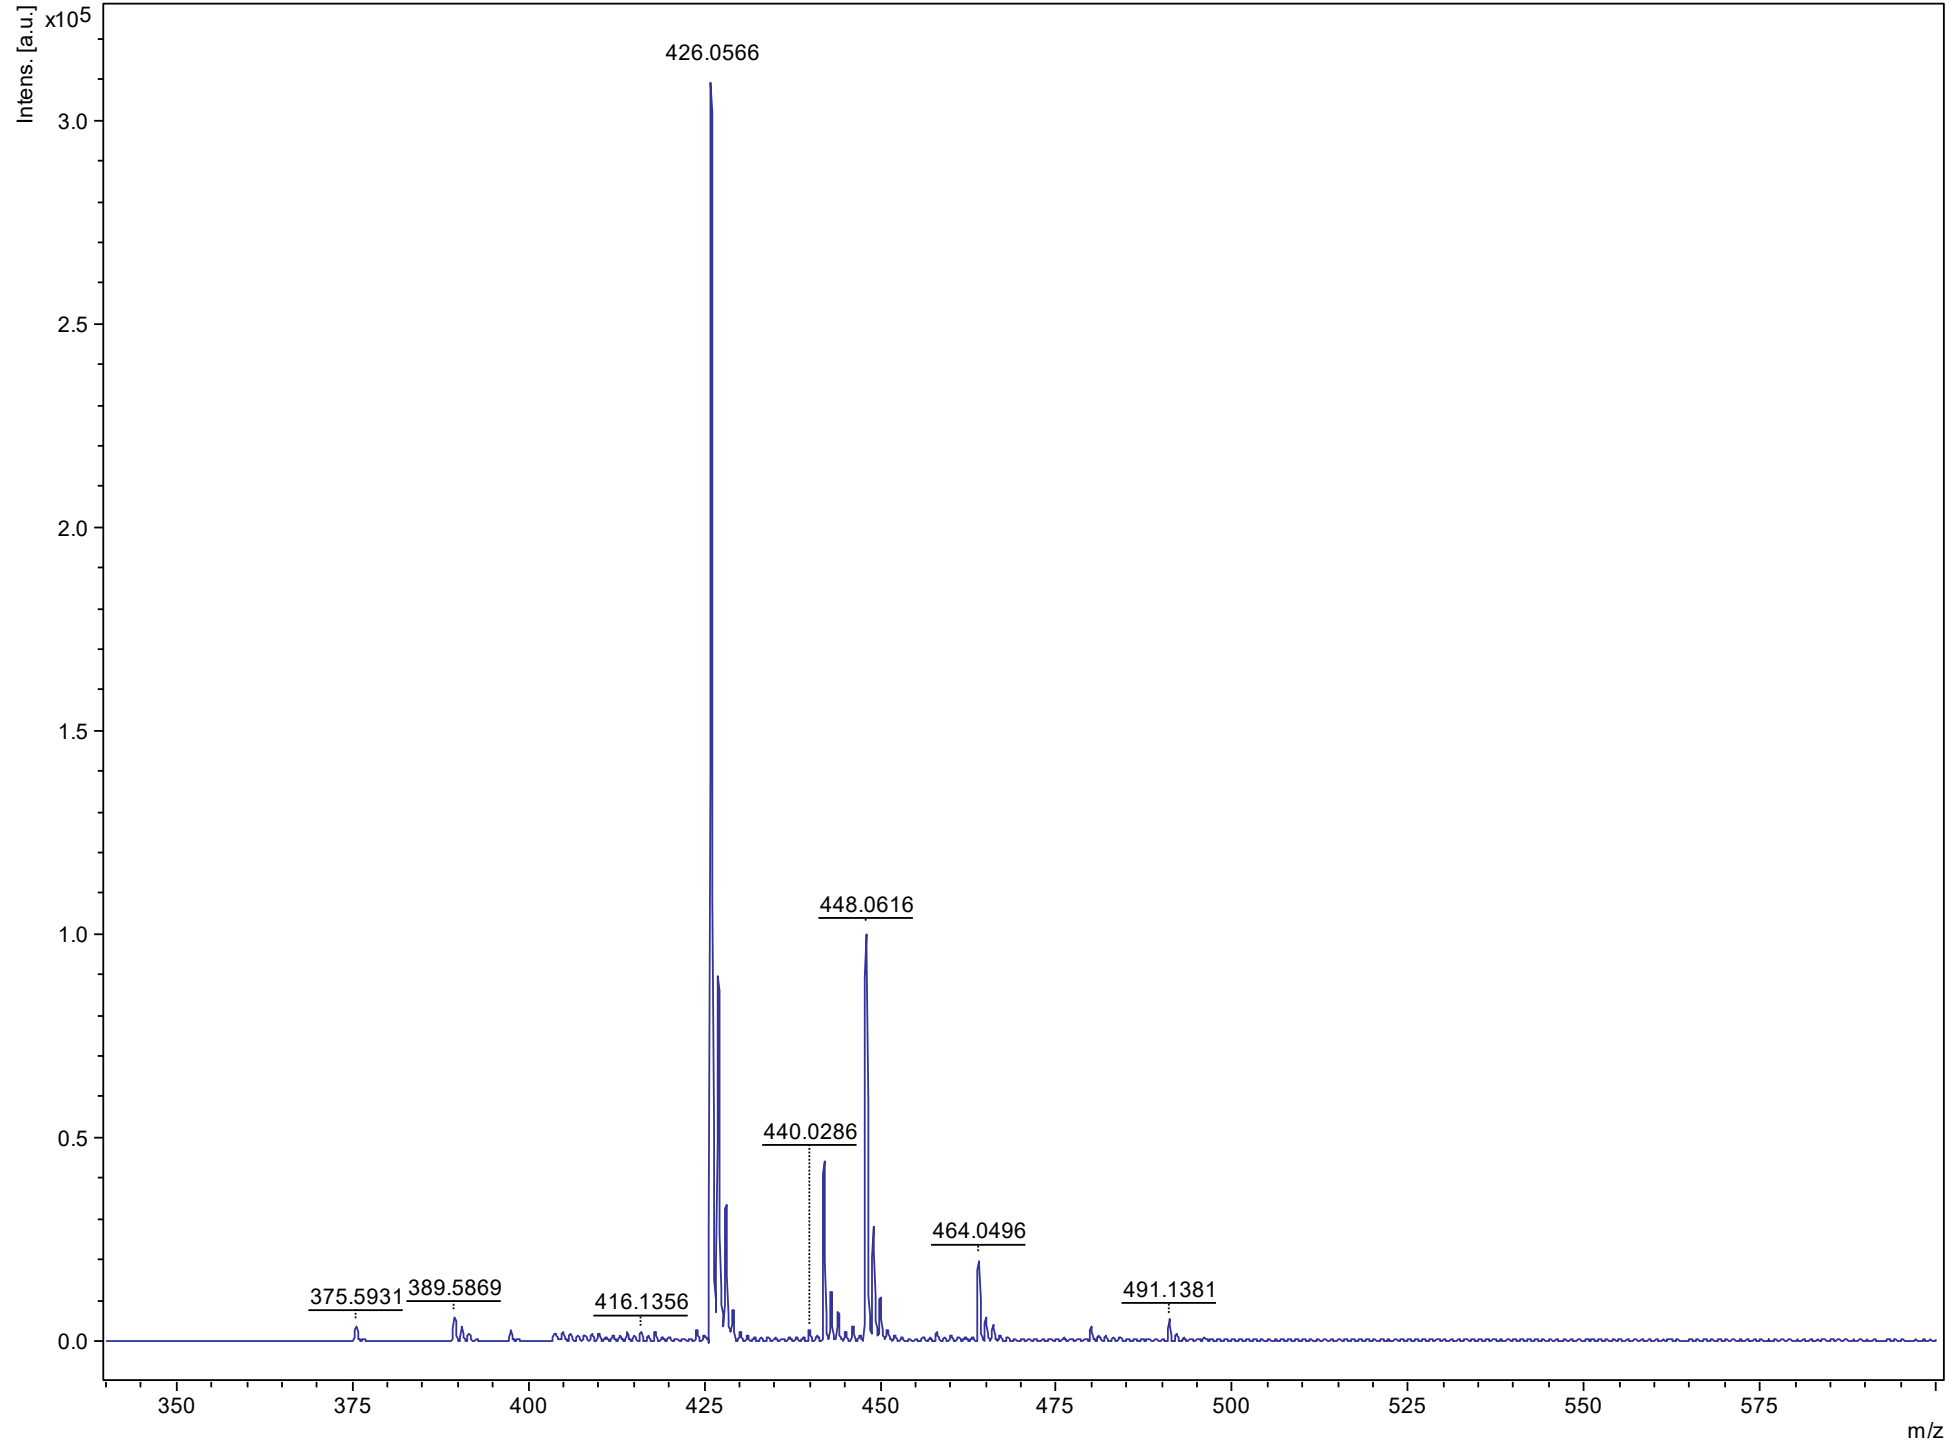

Sample Name: MAS 1-89

```

=====
Acq. Operator   : SYSTEM                      Seq. Line :    4
Acq. Instrument : 1220 HPLC                   Location  :   64
Injection Date  : 9/1/2021 3:45:56 PM       Inj       :    1
                                           Inj Volume: 50.000 µl

Acq. Method    : C:\Chem32\1\Data\luana 2021-09-01 14-40-37\Luana_small_molecule.M
Last changed   : 9/1/2021 3:22:09 PM by SYSTEM
Analysis Method : C:\Chem32\1\Data\luana 2021-09-01 14-40-37\Luana_small_molecule.M (Sequence
Method)
Last changed   : 9/1/2021 3:44:43 PM by SYSTEM
Method Info    : MeOH/water

Sample Info    : MAS 1-89
  
```

Additional Info : Peak(s) manually integrated

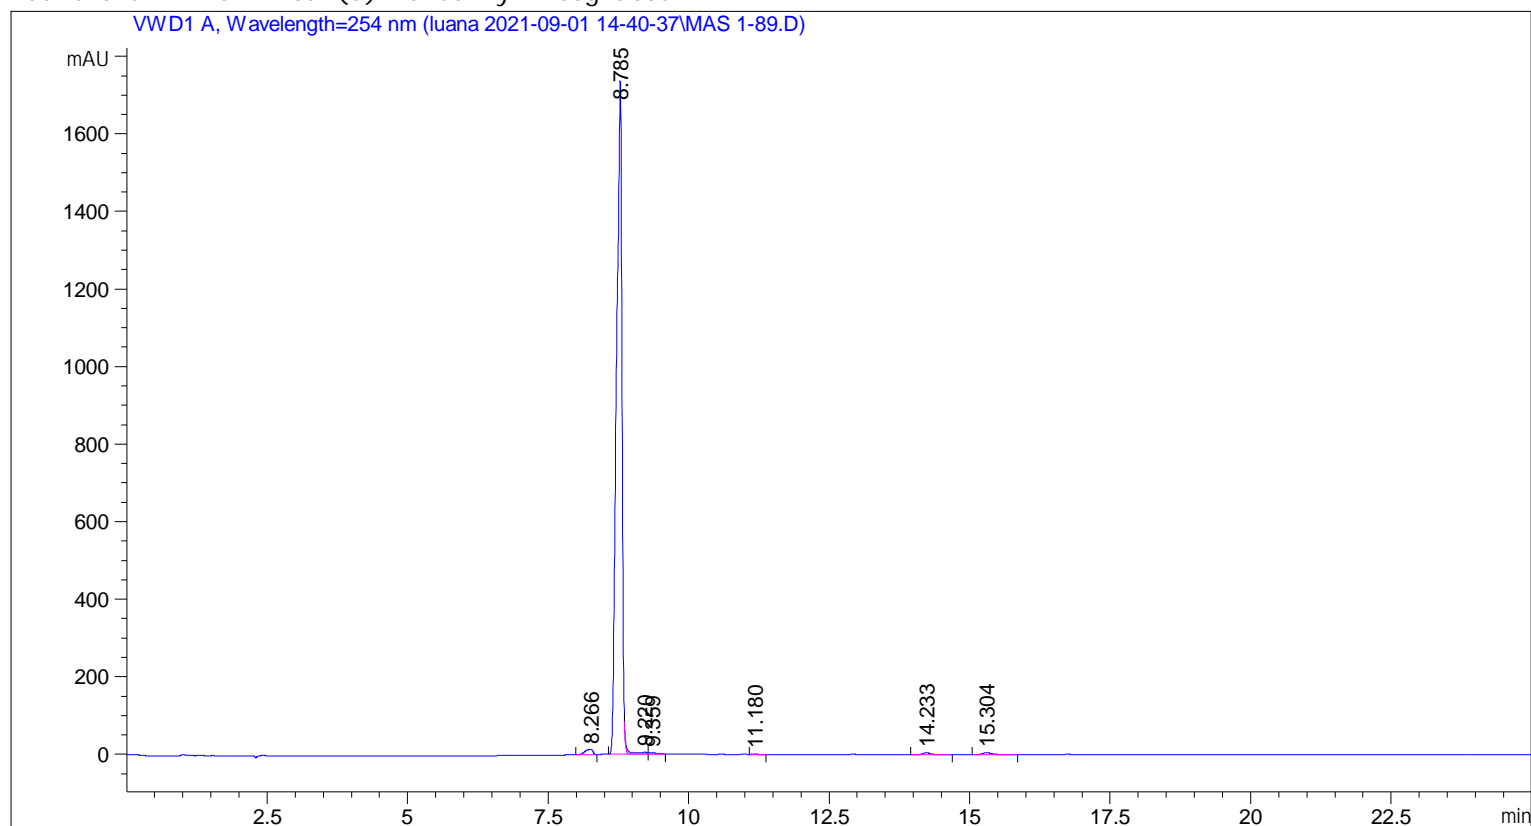

```

=====
                          Area Percent Report
=====
  
```

```

Sorted By      :      Signal
Multiplier     :      1.0000
Dilution       :      1.0000
Use Multiplier & Dilution Factor with ISTDs
  
```

Signal 1: VWD1 A, Wavelength=254 nm

| Peak # | RetTime [min] | Type | Width [min] | Area [mAU*s] | Height [mAU] | Area %  |
|--------|---------------|------|-------------|--------------|--------------|---------|
| 1      | 8.266         | BB   | 0.1293      | 135.62256    | 13.60912     | 1.1246  |
| 2      | 8.785         | BV R | 0.0914      | 1.16741e4    | 1736.51917   | 96.8028 |
| 3      | 9.220         | VV E | 0.2645      | 99.85096     | 4.65096      | 0.8280  |



| Peak # | RetTime [min] | Type | Width [min] | Area [mAU*s] | Height [mAU] | Area % |
|--------|---------------|------|-------------|--------------|--------------|--------|
| 4      | 9.359         | VB E | 0.1130      | 30.70151     | 3.61733      | 0.2546 |
| 5      | 11.180        | VB   | 0.0873      | 9.99174      | 1.73174      | 0.0829 |
| 6      | 14.233        | BB   | 0.1517      | 48.99443     | 4.93881      | 0.4063 |
| 7      | 15.304        | BB   | 0.1597      | 60.41753     | 5.56179      | 0.5010 |

Totals : 1.20597e4 1770.62891

=====  
\*\*\* End of Report \*\*\*

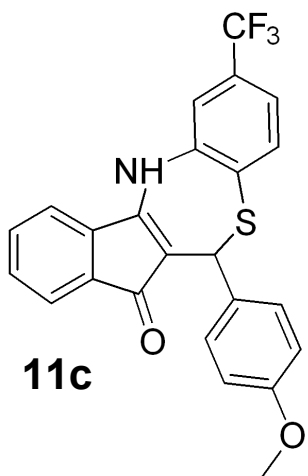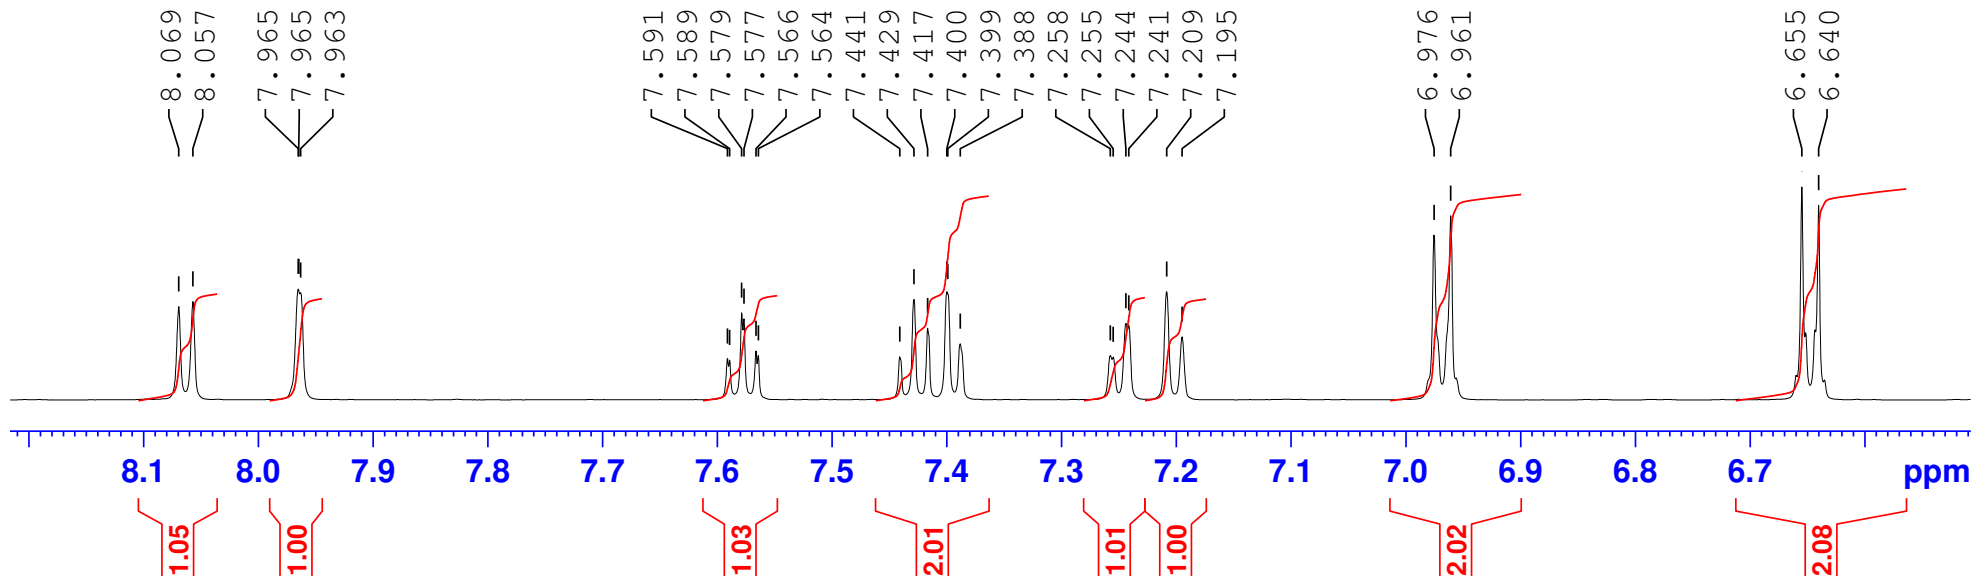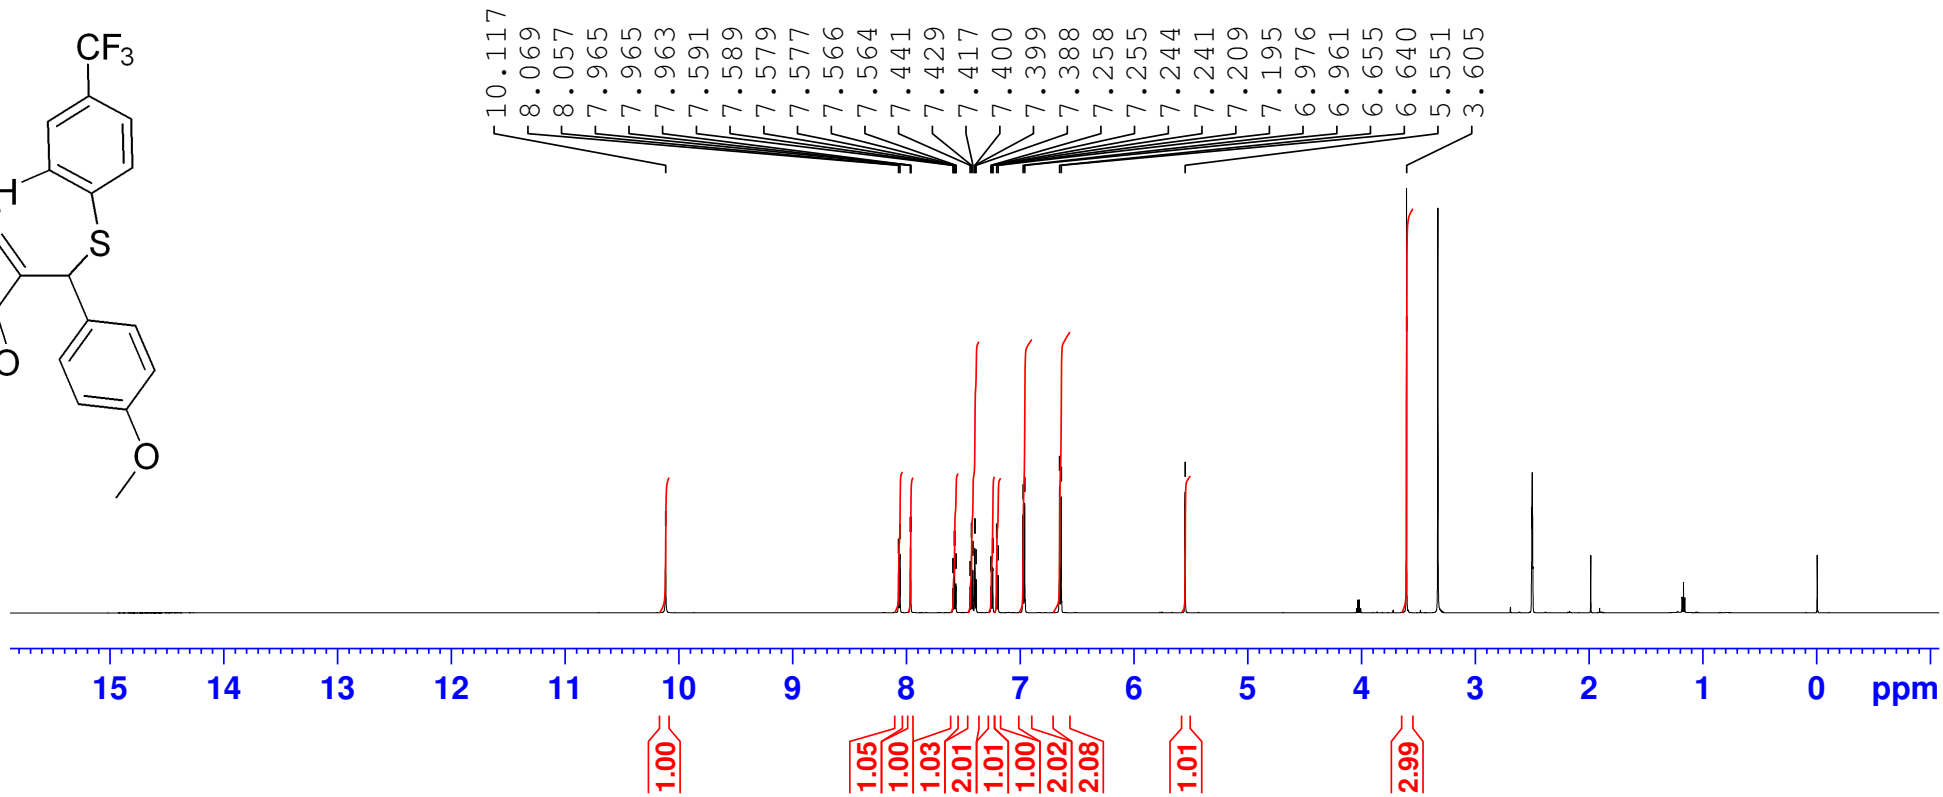

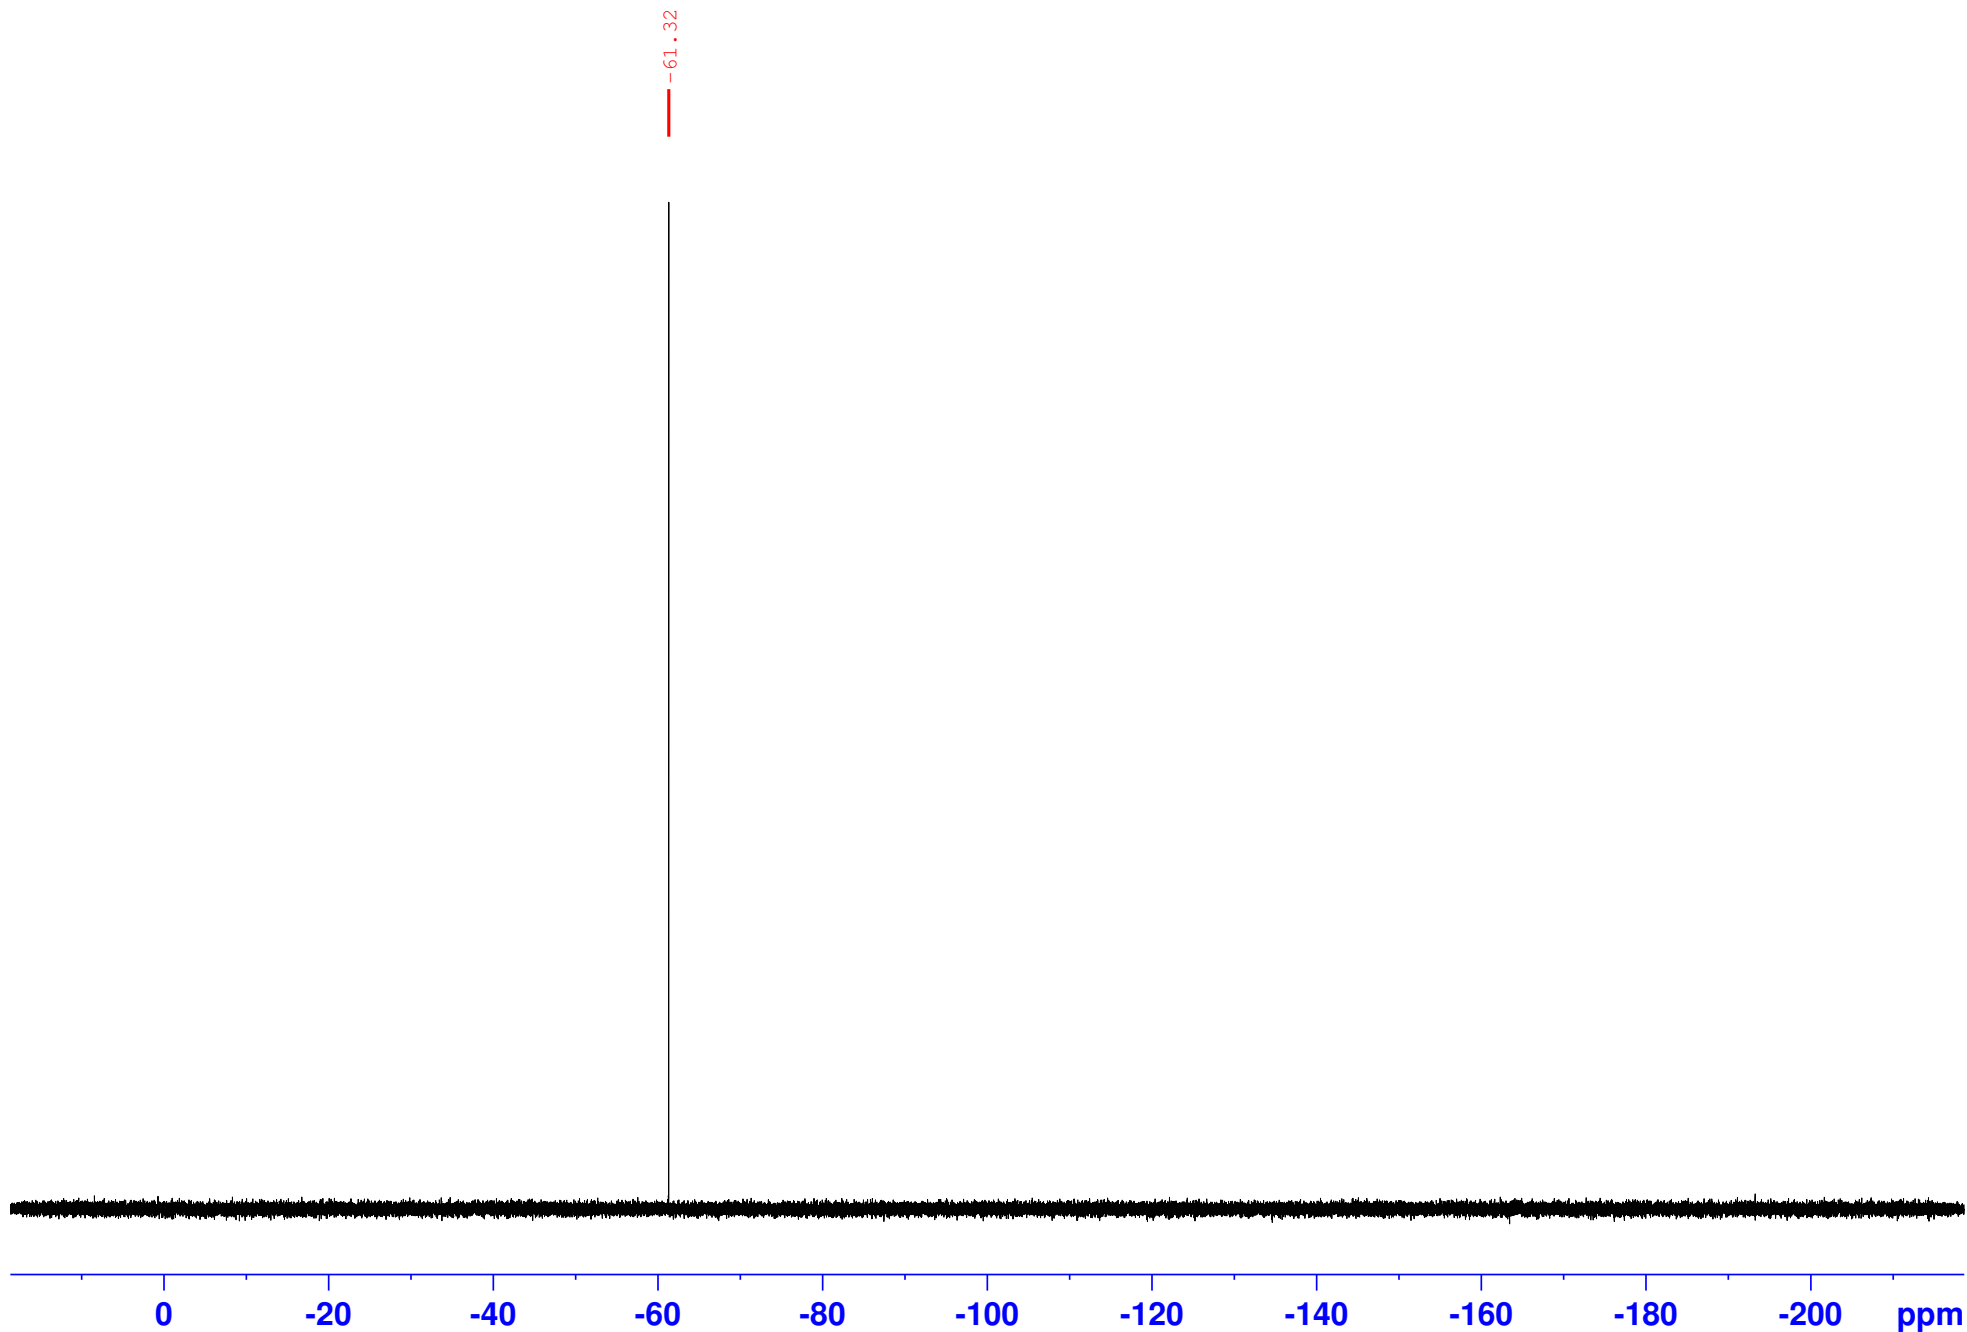

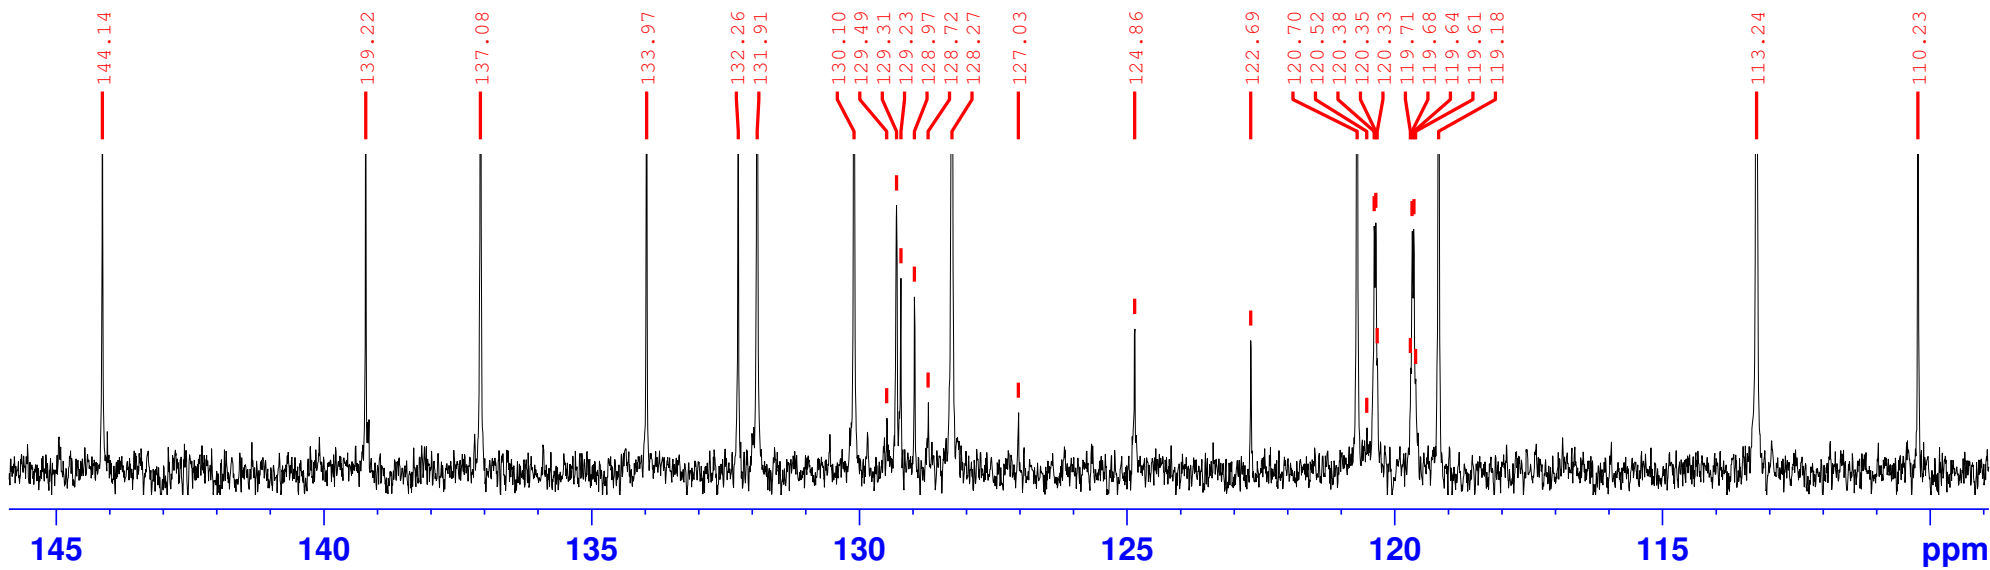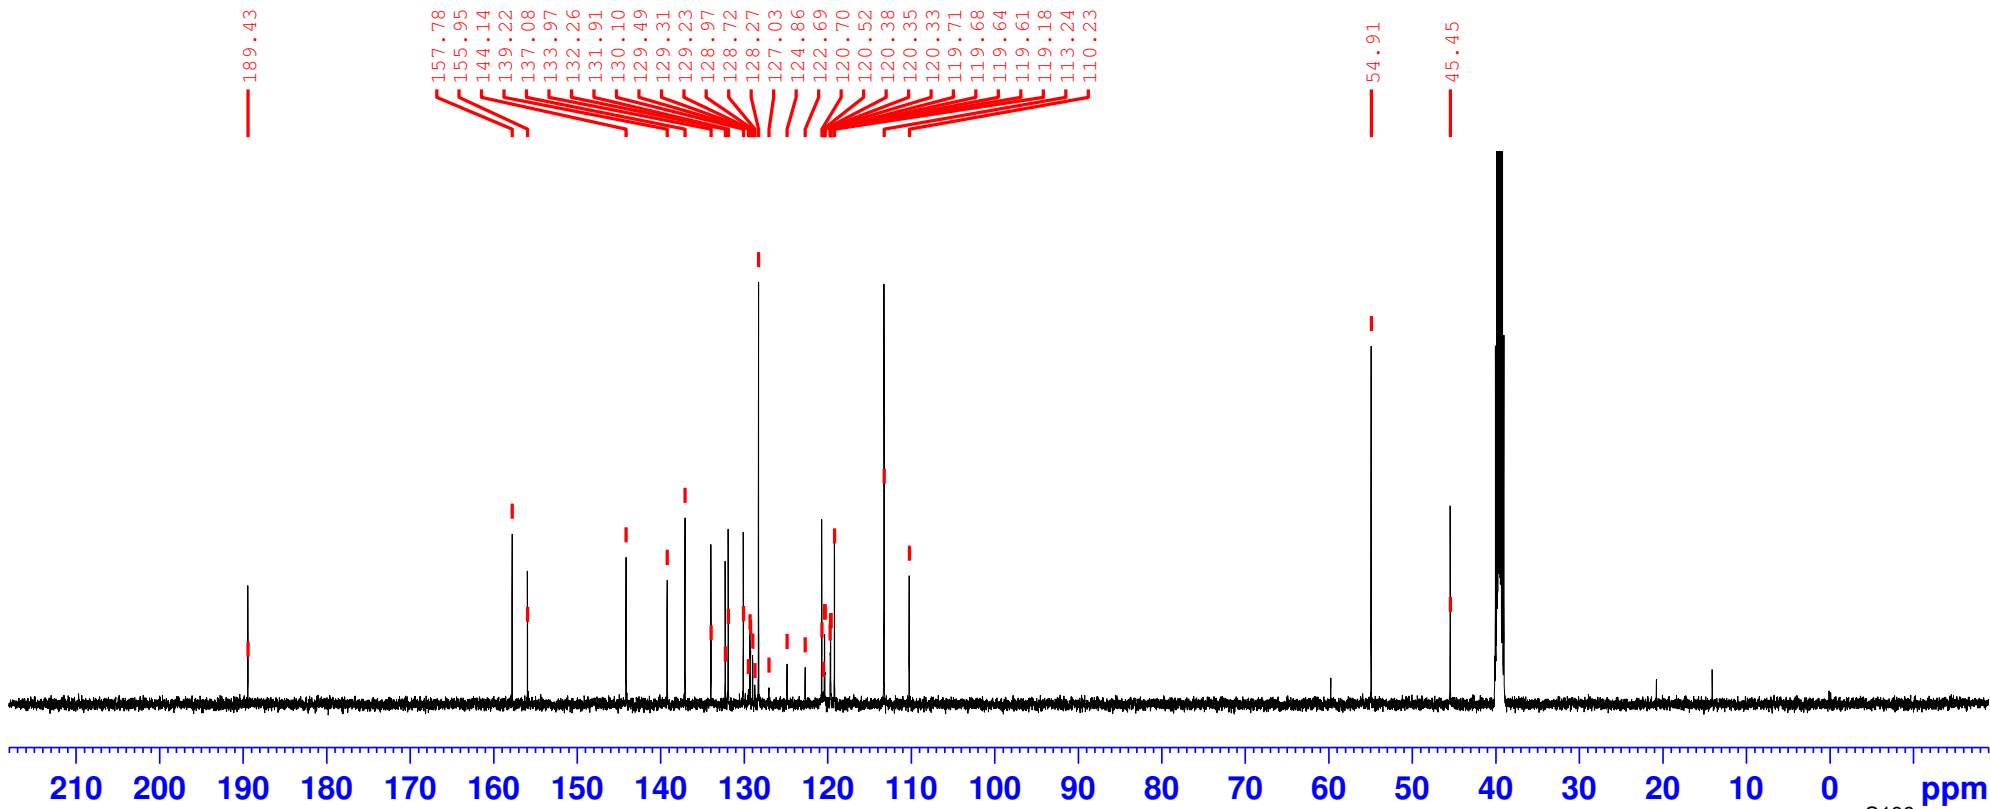

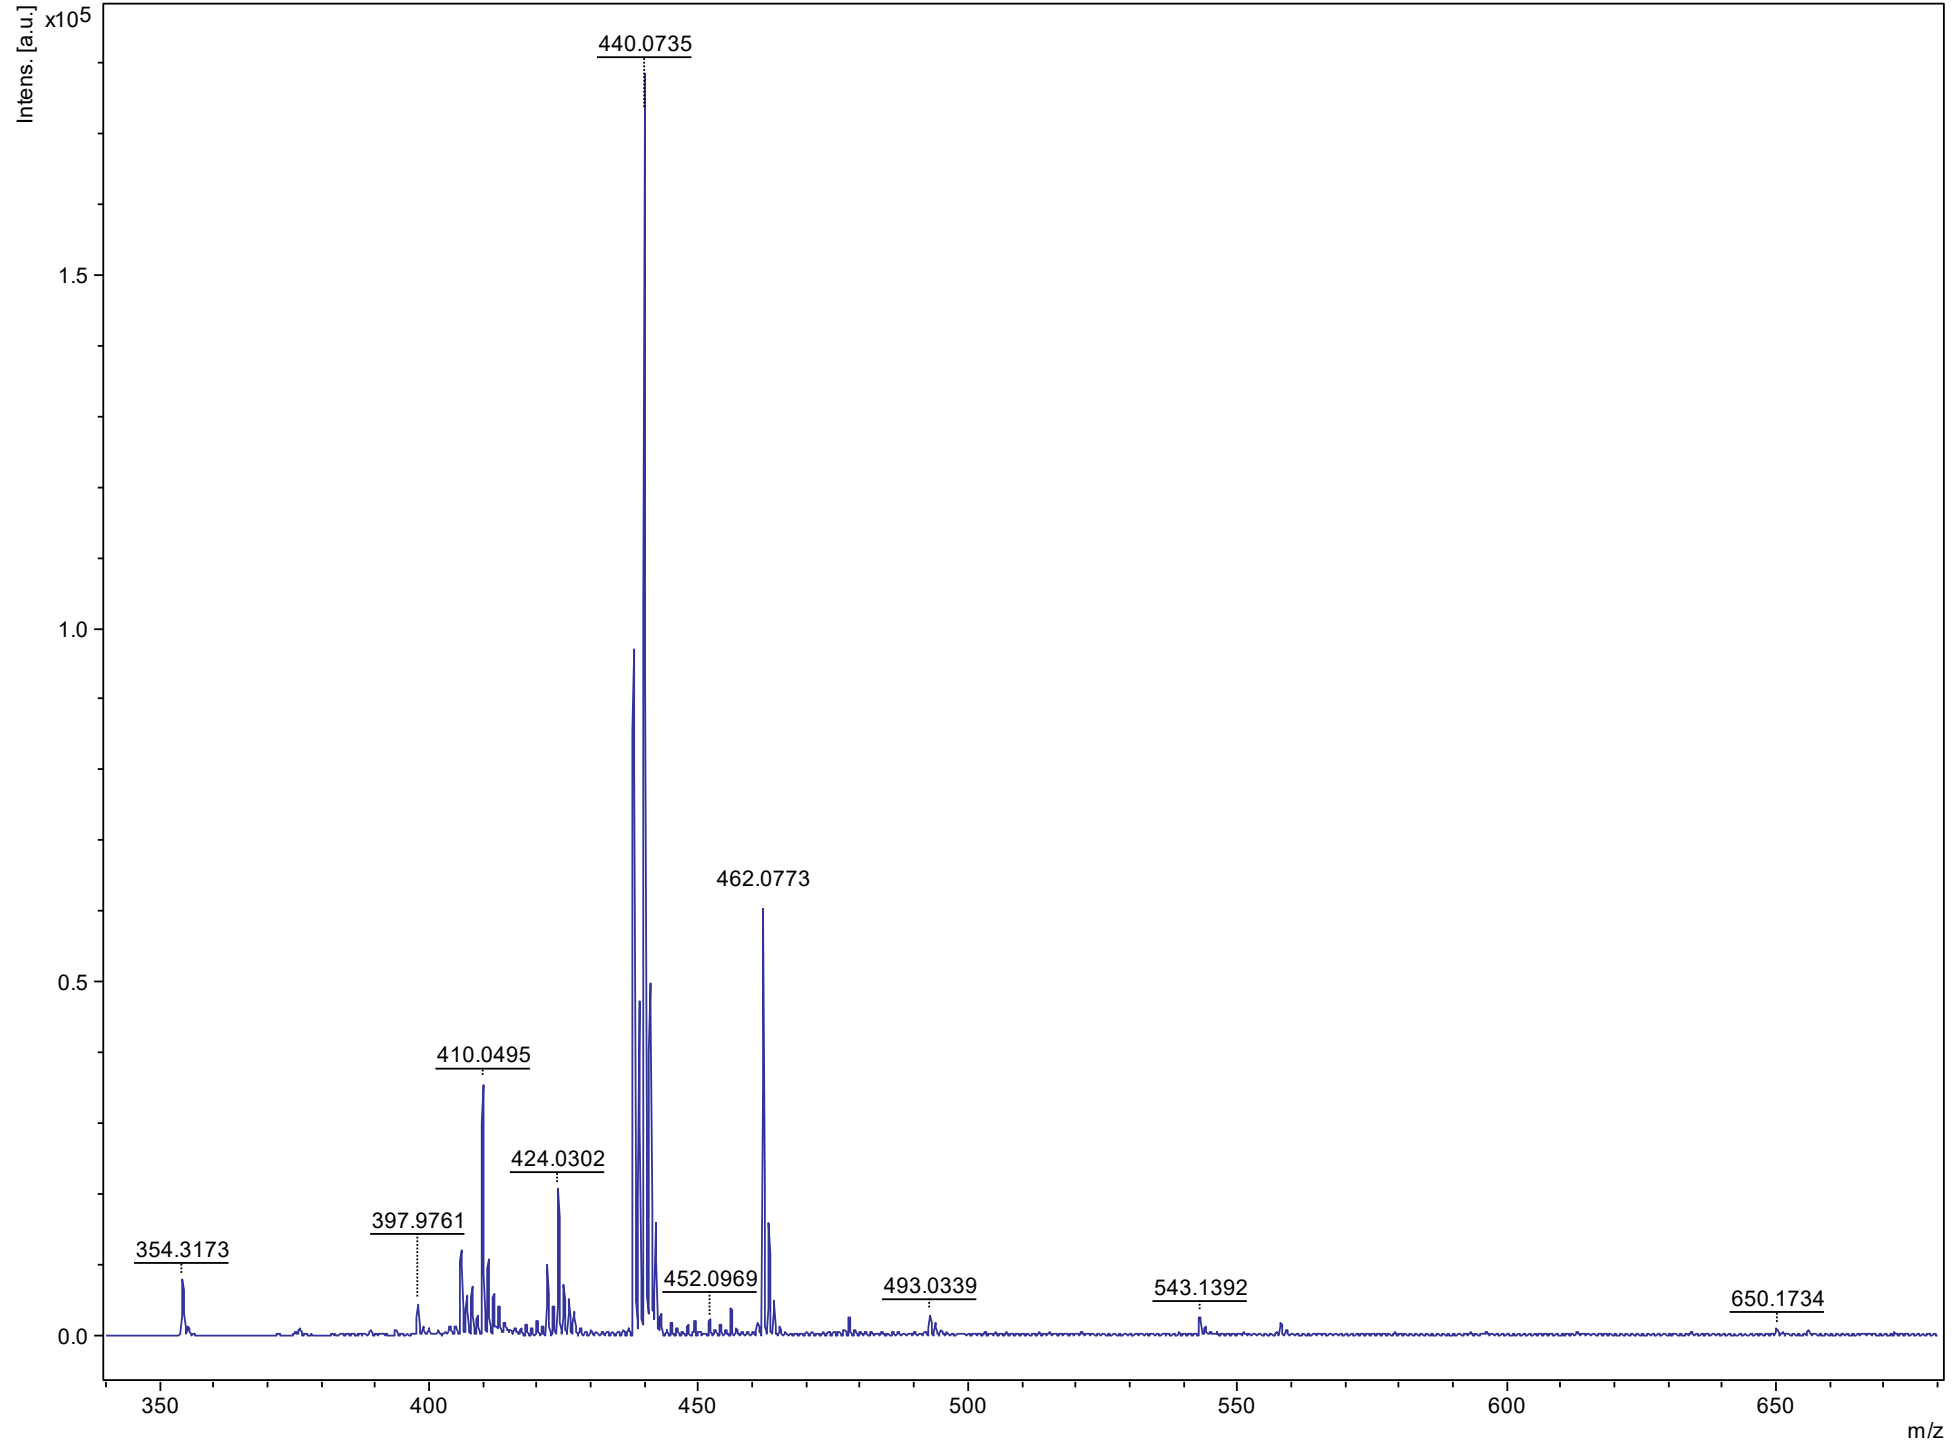

Sample Name: LJC 1-78

```

=====
Acq. Operator   : SYSTEM                      Seq. Line :   14
Acq. Instrument : 1220 HPLC                    Location  :   16
Injection Date  : 10/10/2020 3:44:21 PM      Inj       :    1
                                           Inj Volume: 30.000 µl
Different Inj Volume from Sample Entry! Actual Inj Volume : 50.000 µl
Method         : C:\Chem32\1\Data\luana 2020-10-10 09-45-18\MOHAMED-SMALL MOLECULE.M (
                Sequence Method)
Last changed   : 10/10/2020 10:17:41 AM by SYSTEM
Method Info    : Water/MeOH

Sample Info    : LJC 1-78
  
```

Additional Info : Peak(s) manually integrated

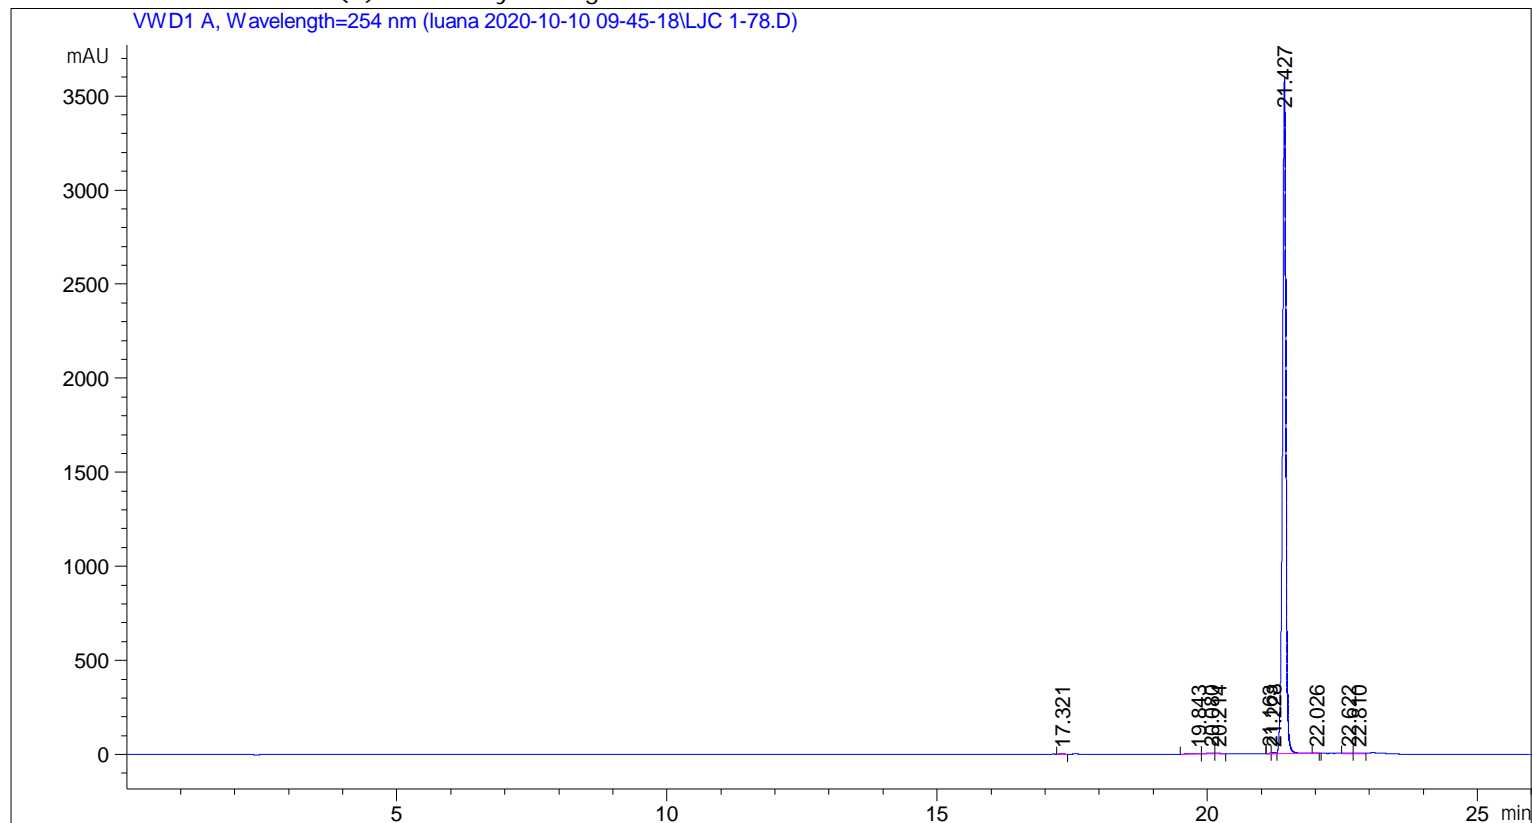

```

=====
                        Area Percent Report
=====
  
```

```

Sorted By       :      Signal
Multiplier      :      1.0000
Dilution        :      1.0000
Use Multiplier & Dilution Factor with ISTDs
  
```

Signal 1: VWD1 A, Wavelength=254 nm

| Peak # | RetTime [min] | Type | Width [min] | Area [mAU*s] | Height [mAU] | Area % |
|--------|---------------|------|-------------|--------------|--------------|--------|
| 1      | 17.321        | VV   | 0.0921      | 19.61564     | 2.73871      | 0.1237 |
| 2      | 19.843        | BV   | 0.1106      | 26.51312     | 3.10481      | 0.1673 |
| 3      | 20.080        | VV   | 0.1316      | 61.31062     | 6.05472      | 0.3868 |
| 4      | 20.214        | VB   | 0.0835      | 37.57326     | 6.30641      | 0.2370 |

| Peak # | RetTime [min] | Type | Width [min] | Area [mAU*s] | Height [mAU] | Area %  |
|--------|---------------|------|-------------|--------------|--------------|---------|
| 5      | 21.163        | BV E | 0.0422      | 9.25904      | 3.25664      | 0.0584  |
| 6      | 21.228        | VV E | 0.0550      | 24.77566     | 6.87709      | 0.1563  |
| 7      | 21.427        | VV R | 0.0653      | 1.56056e4    | 3583.66895   | 98.4485 |
| 8      | 22.026        | VB E | 0.0564      | 6.26016      | 1.76614      | 0.0395  |
| 9      | 22.622        | VV   | 0.1019      | 19.76054     | 2.65313      | 0.1247  |
| 10     | 22.810        | VV   | 0.1606      | 40.87181     | 3.07372      | 0.2578  |

Totals : 1.58515e4 3619.50030

=====  
\*\*\* End of Report \*\*\*

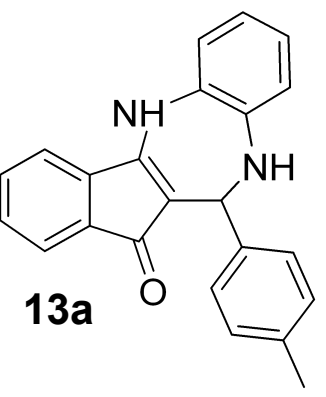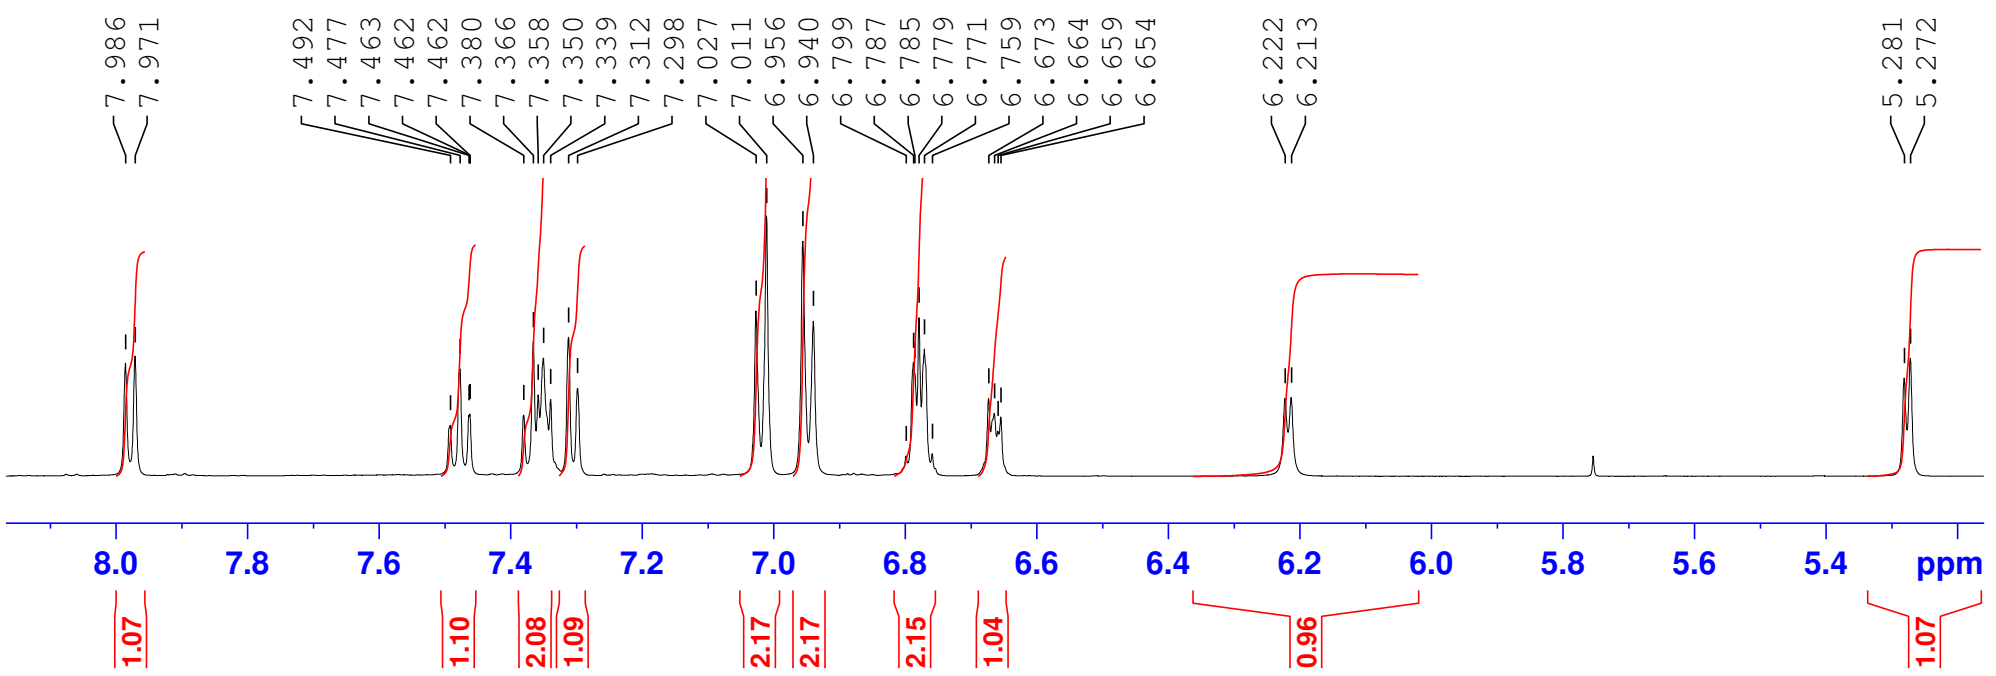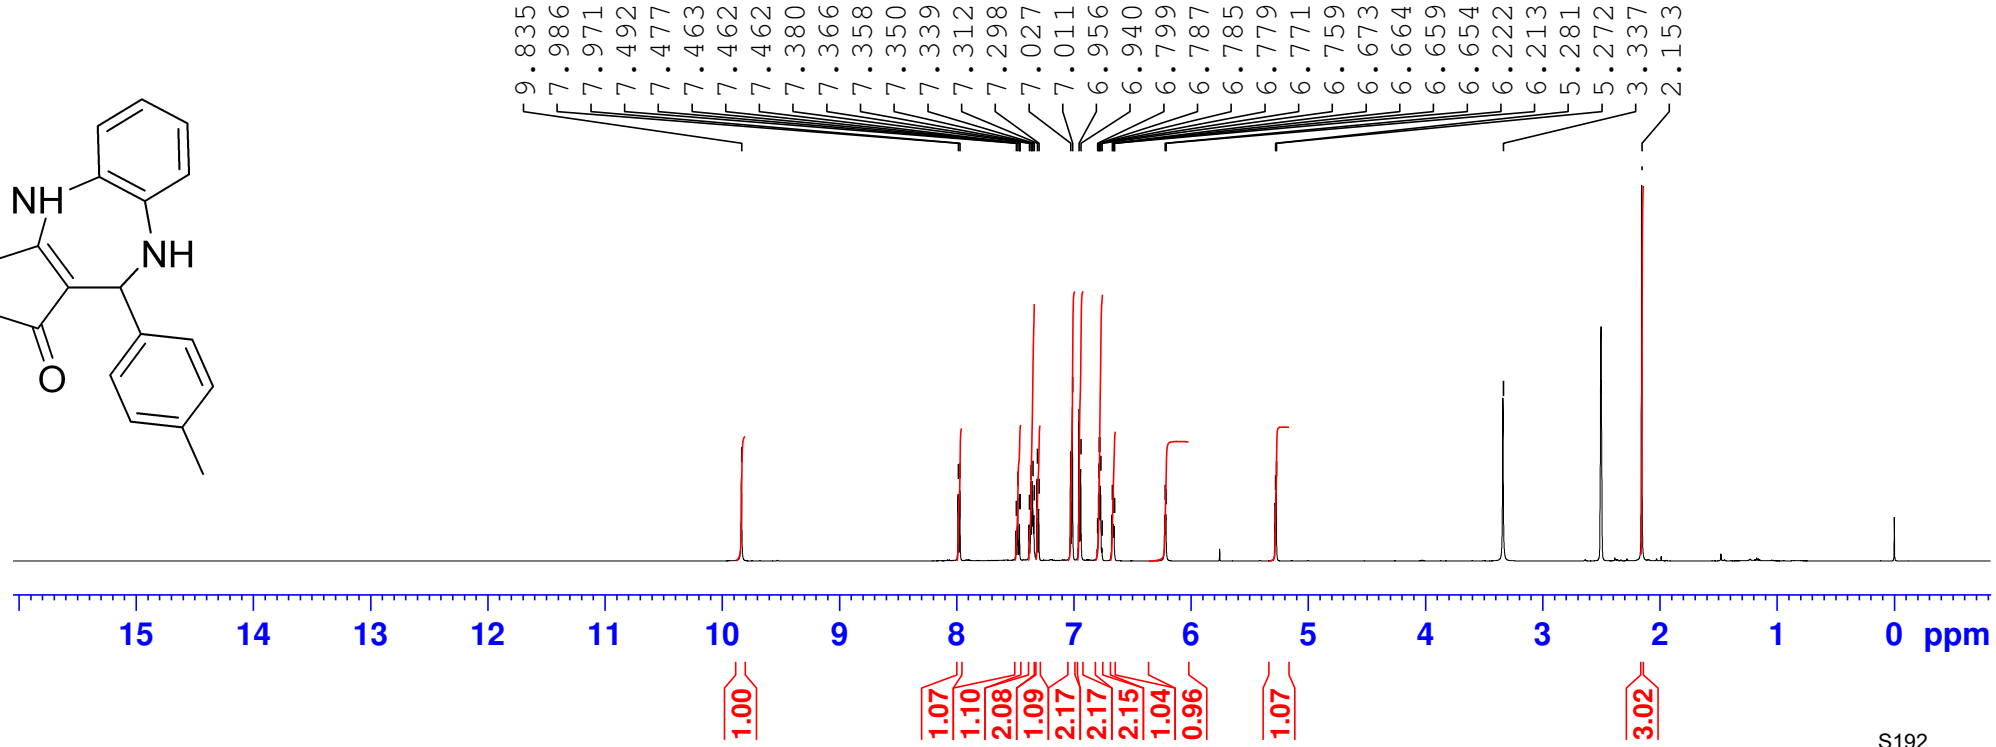



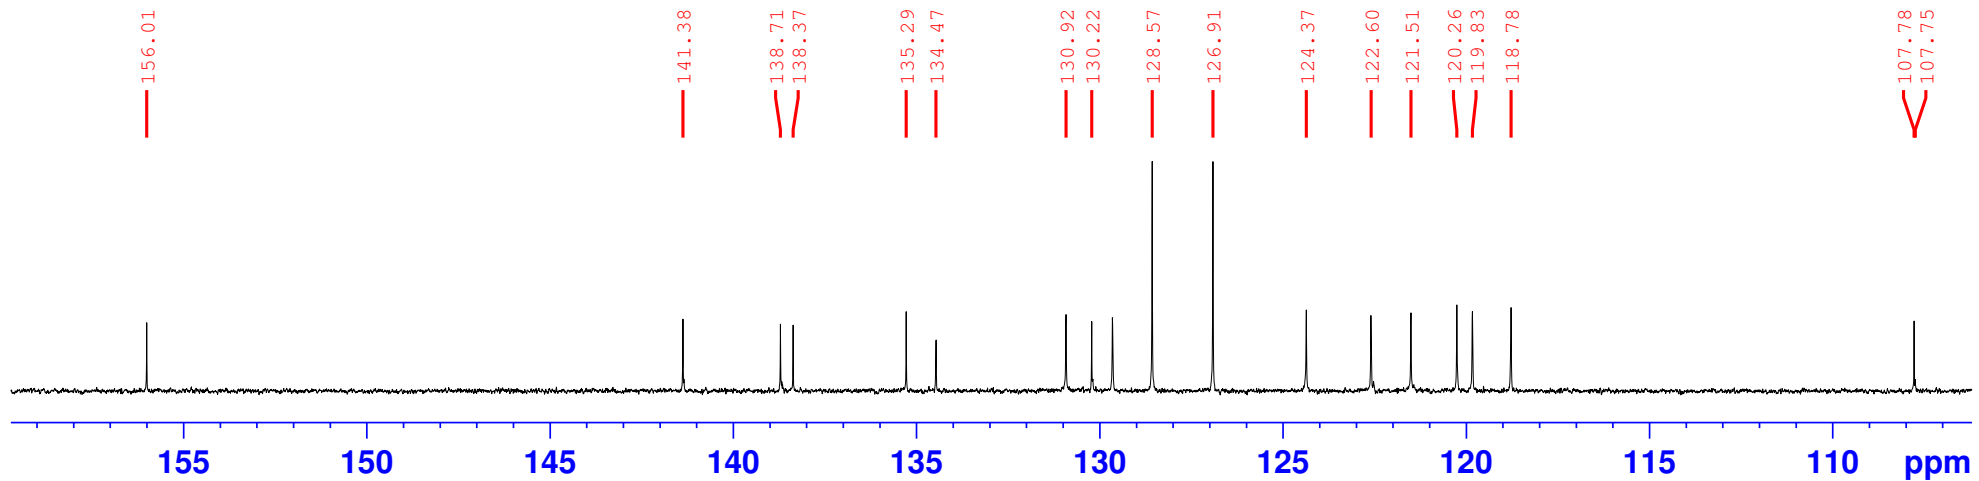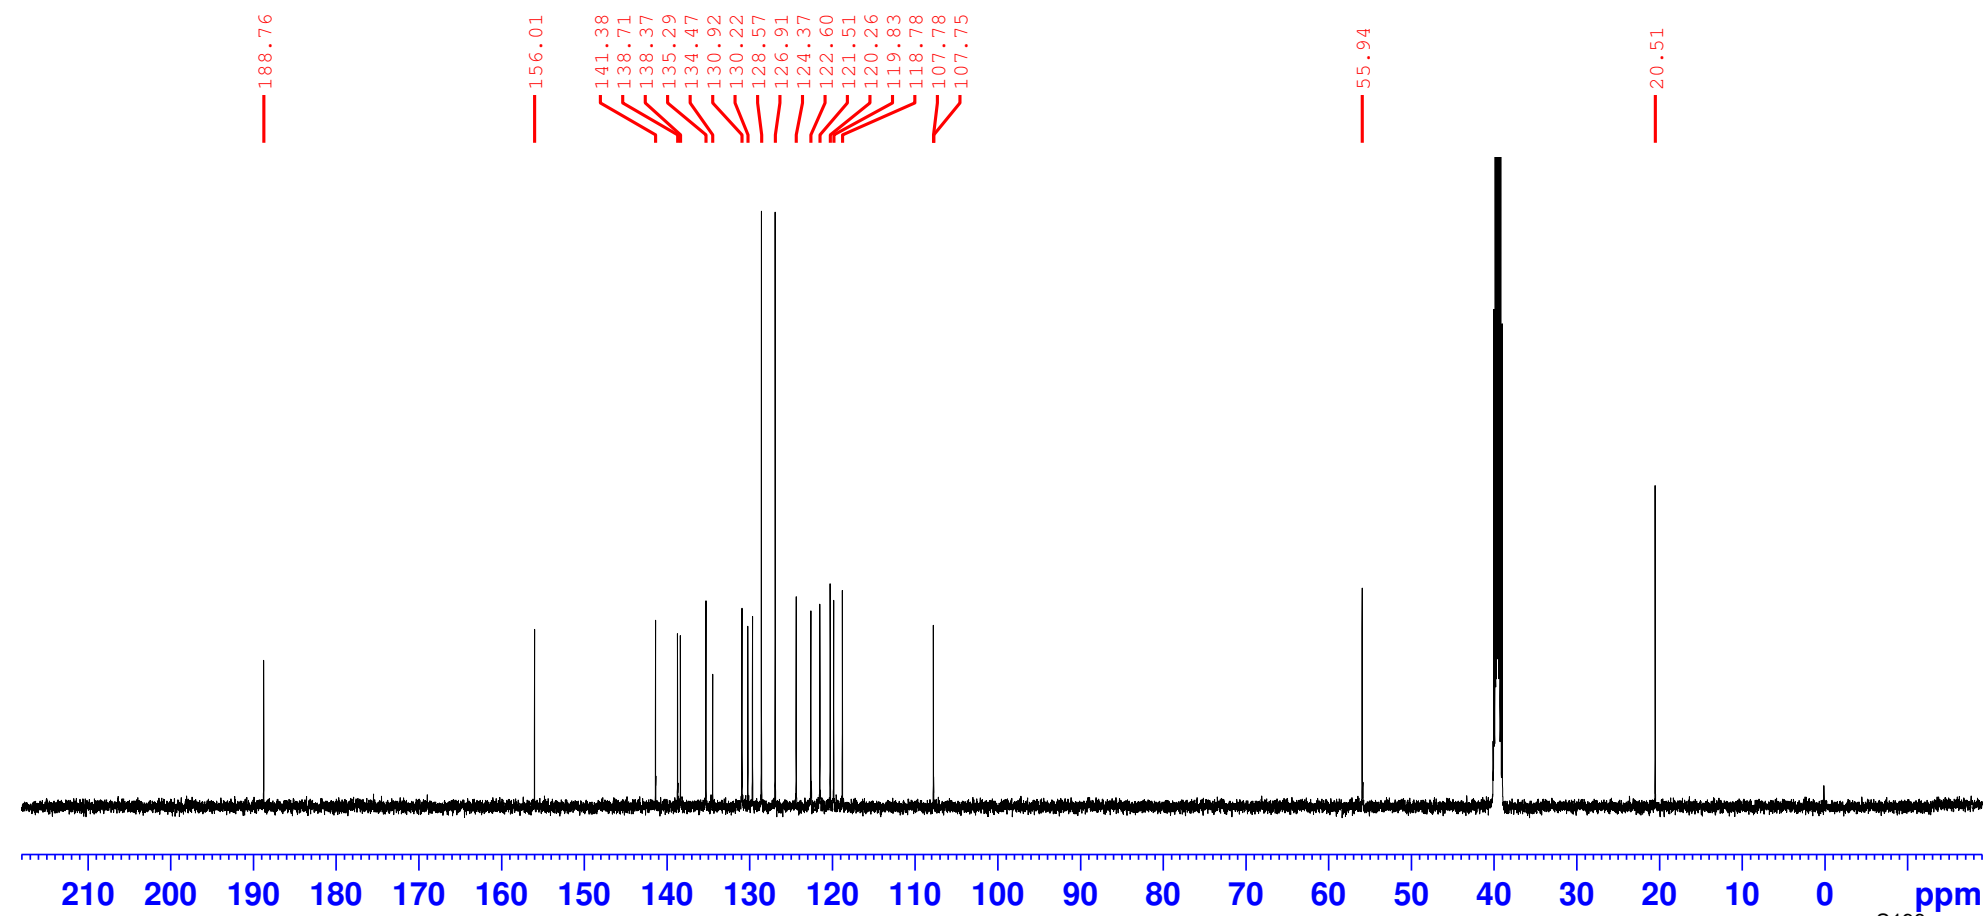

# User Spectrum Plot Report

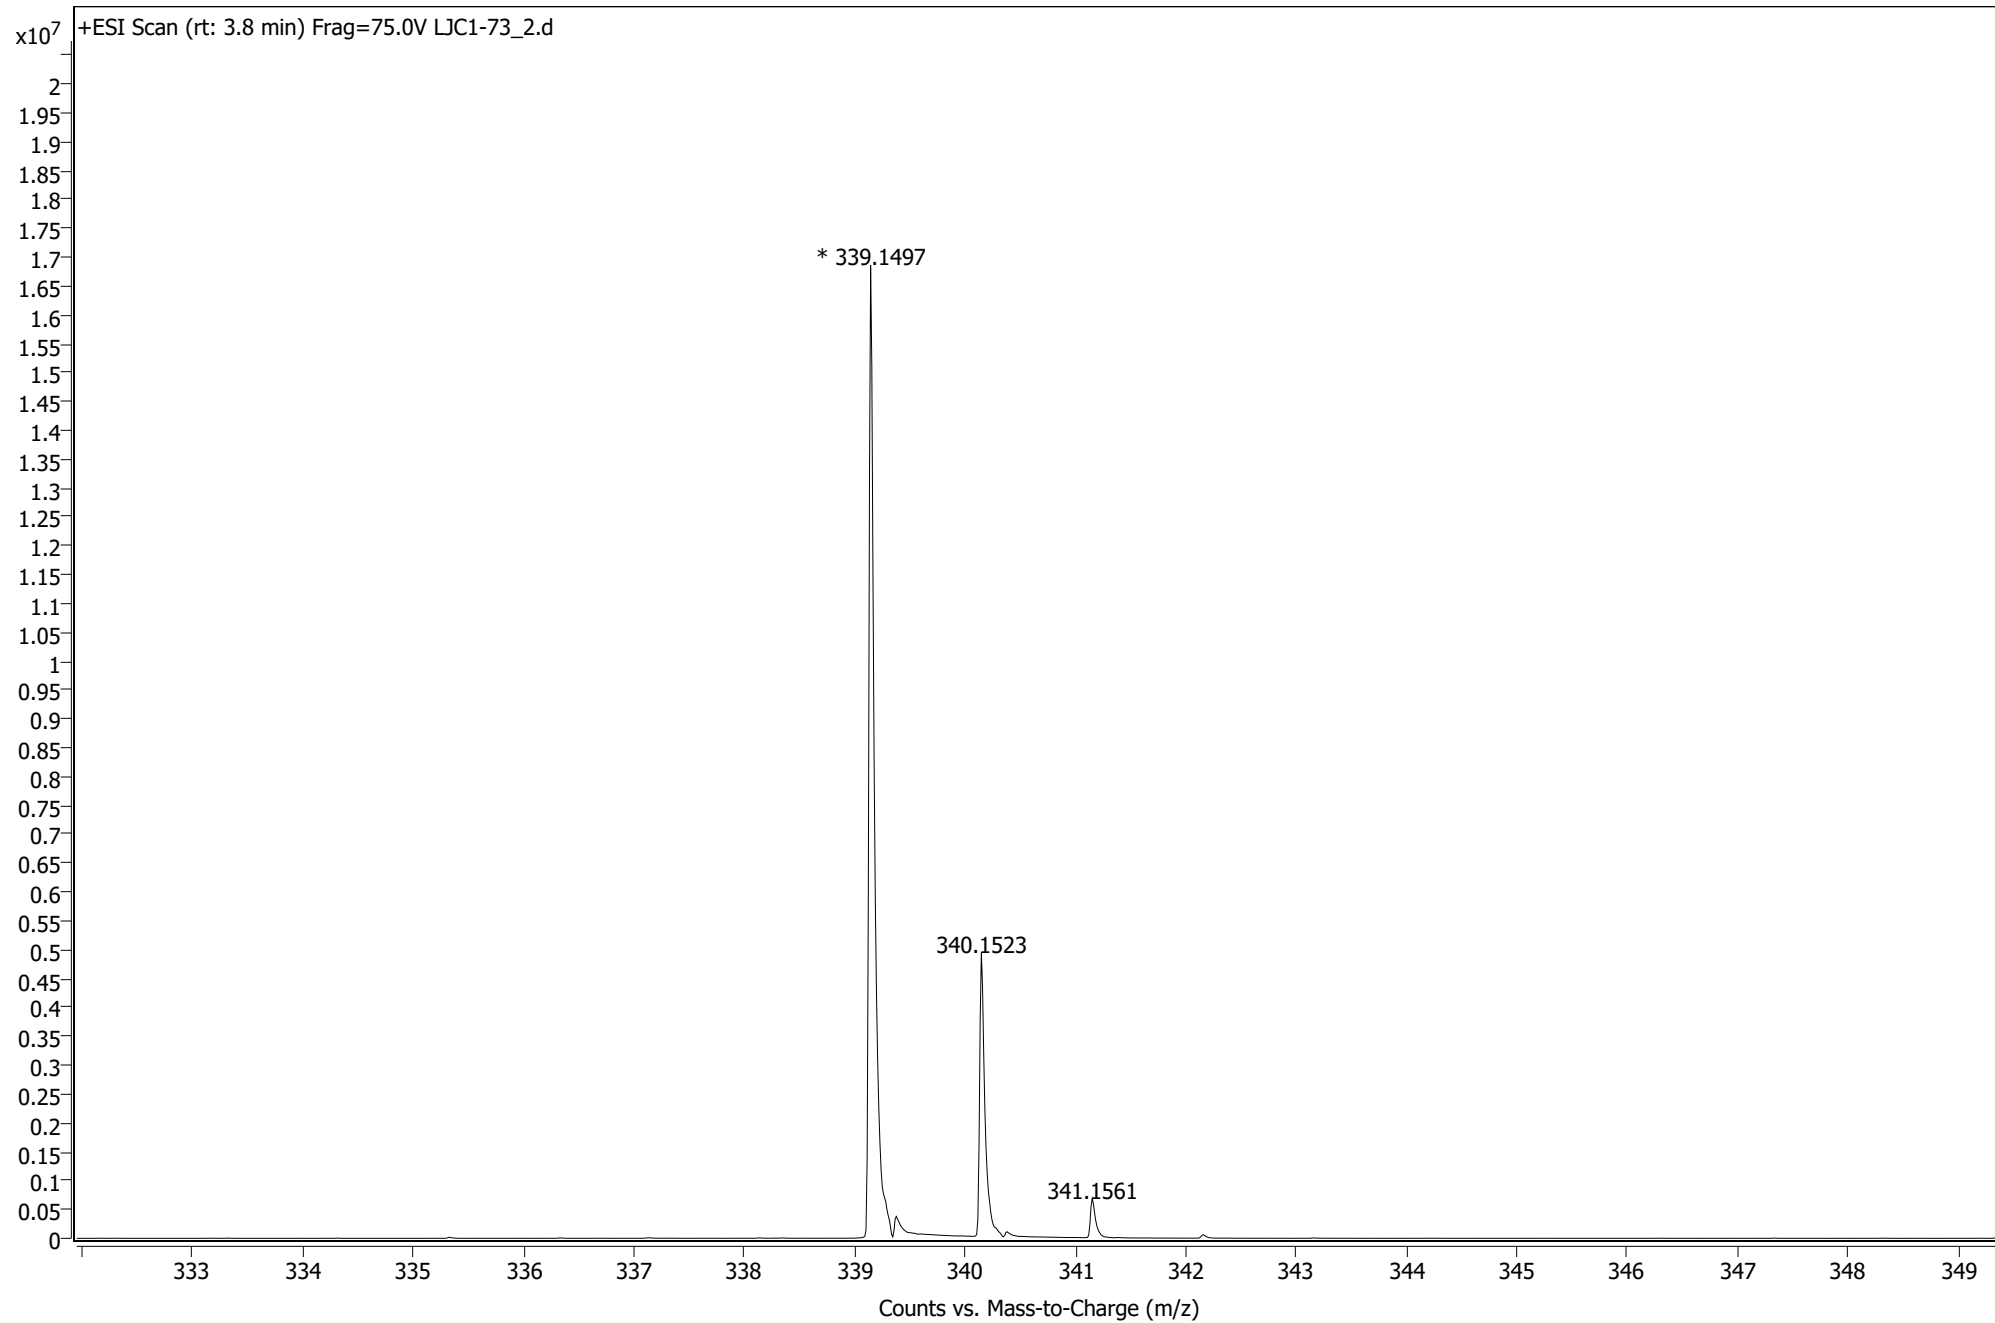

Sample Name: LJC1-73

```

=====
Acq. Operator   : SYSTEM                      Seq. Line :    5
Acq. Instrument : 1220 HPLC                   Location  :   13
Injection Date  : 10/10/2020 11:35:41 AM     Inj       :    1
                                           Inj Volume: 30.000 µl
Different Inj Volume from Sample Entry! Actual Inj Volume : 50.000 µl
Method          : C:\Chem32\1\Data\luana 2020-10-10 09-45-18\MOHAMED-SMALL MOLECULE.M (
                Sequence Method)
Last changed    : 10/10/2020 10:17:41 AM by SYSTEM
Method Info     : Water/MeOH

Sample Info     : LJC1-73
    
```

Additional Info : Peak(s) manually integrated

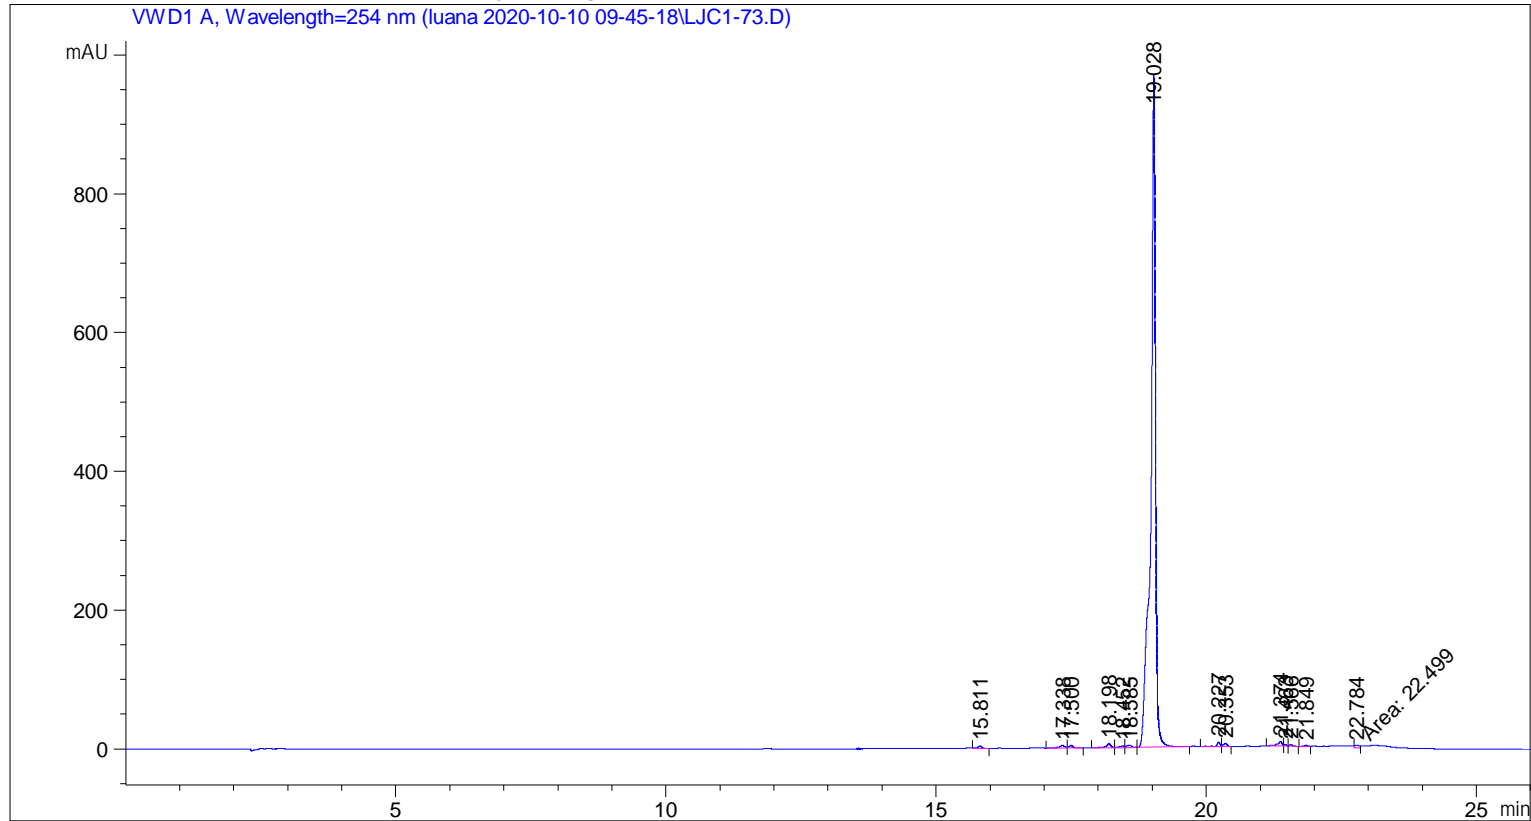

Area Percent Report

```

Sorted By      :      Signal
Multiplier     :      1.0000
Dilution       :      1.0000
Use Multiplier & Dilution Factor with ISTDs
    
```

Signal 1: VWD1 A, Wavelength=254 nm

| Peak # | RetTime [min] | Type | Width [min] | Area [mAU*s] | Height [mAU] | Area % |
|--------|---------------|------|-------------|--------------|--------------|--------|
| 1      | 15.811        | VB   | 0.0831      | 21.59780     | 3.56684      | 0.3549 |
| 2      | 17.338        | BV   | 0.0999      | 31.56418     | 4.28780      | 0.5187 |
| 3      | 17.500        | VB   | 0.0738      | 21.13401     | 3.92349      | 0.3473 |
| 4      | 18.198        | BV   | 0.0910      | 40.75897     | 6.10017      | 0.6698 |



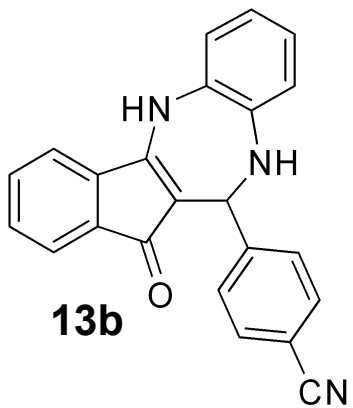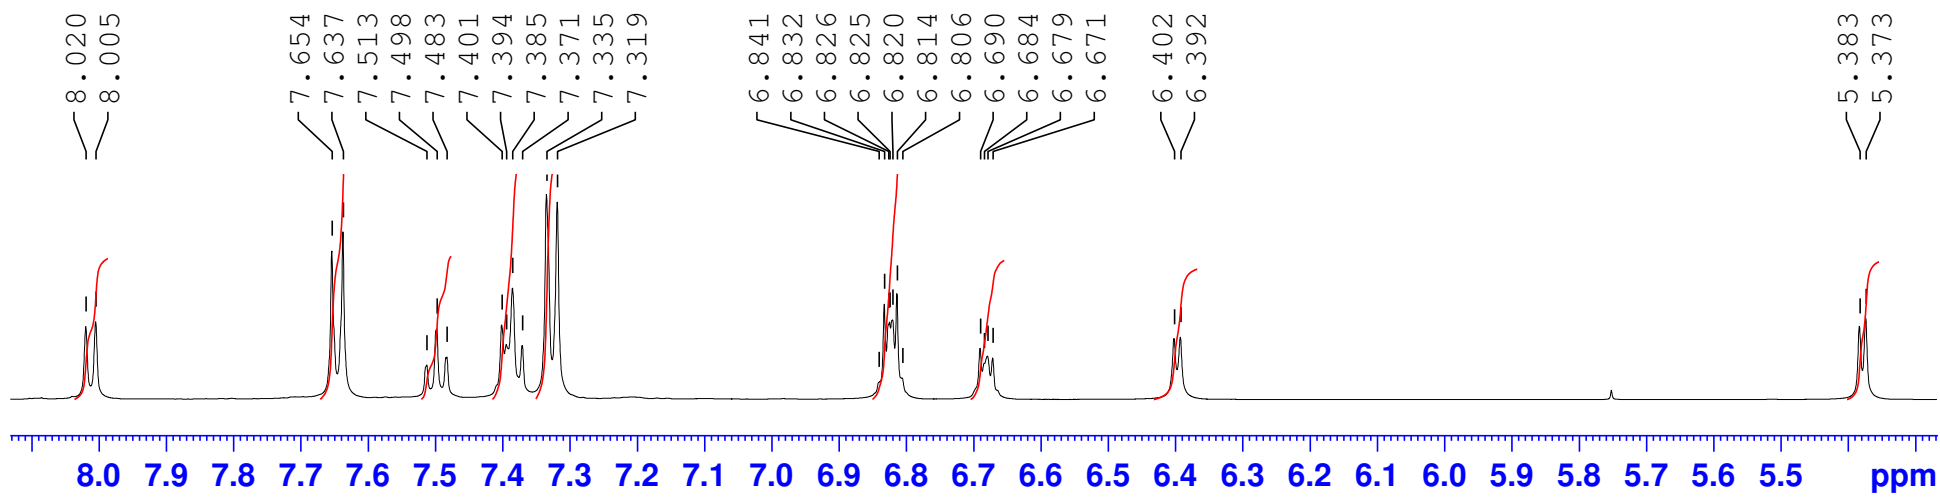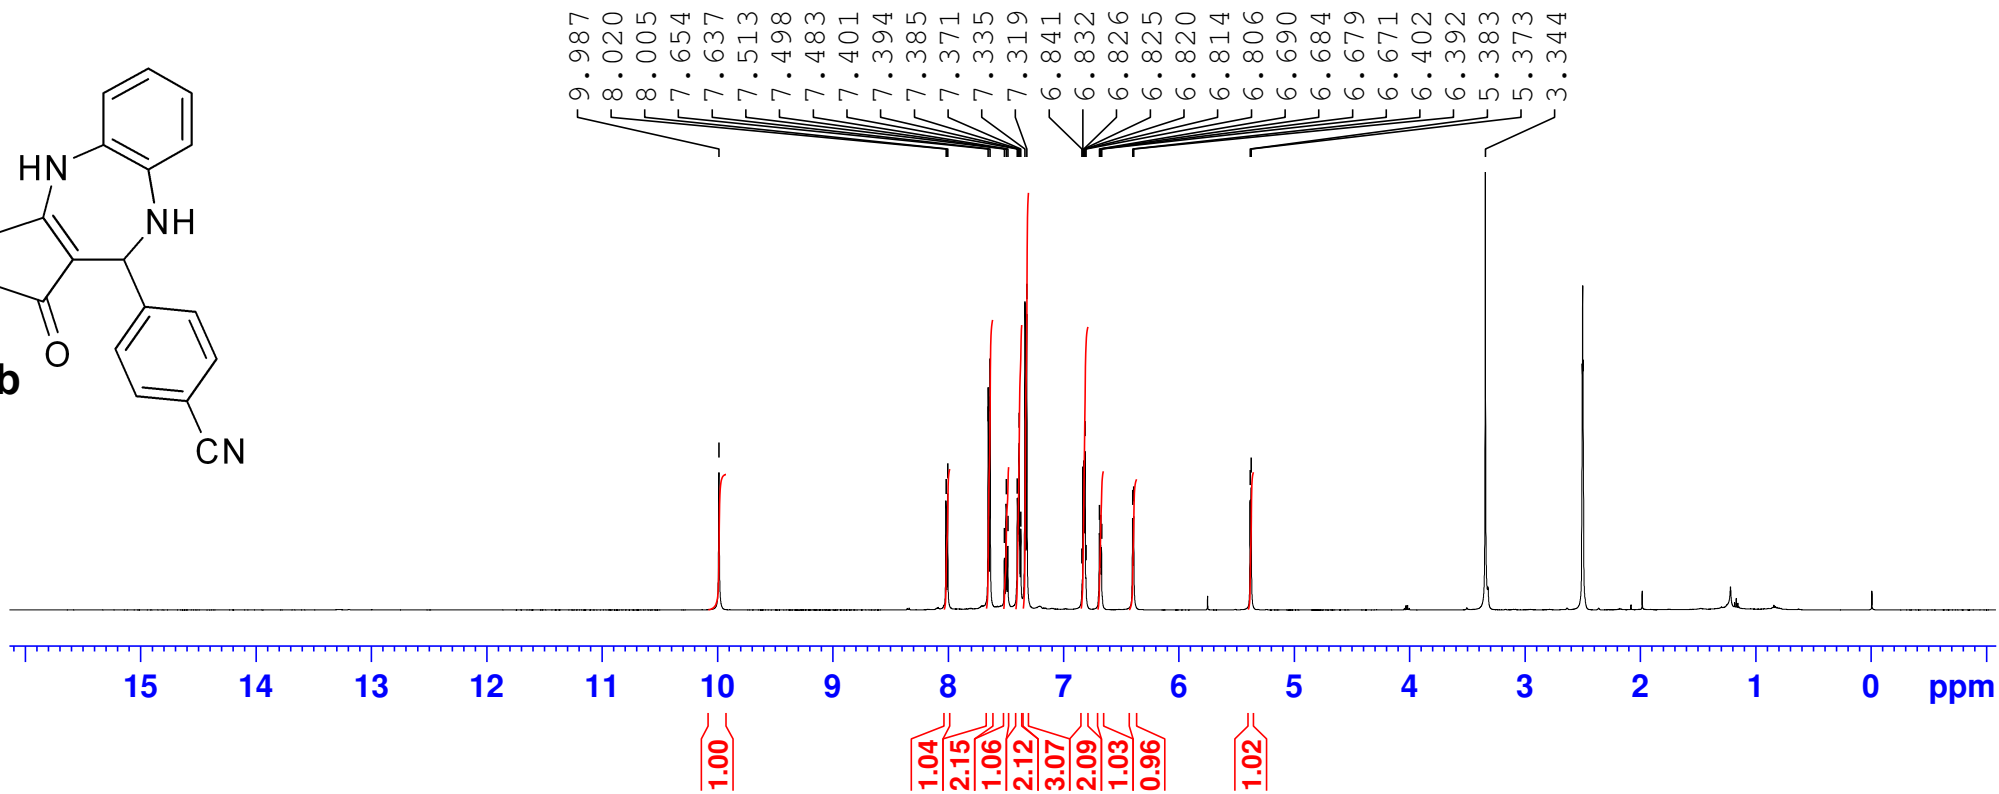

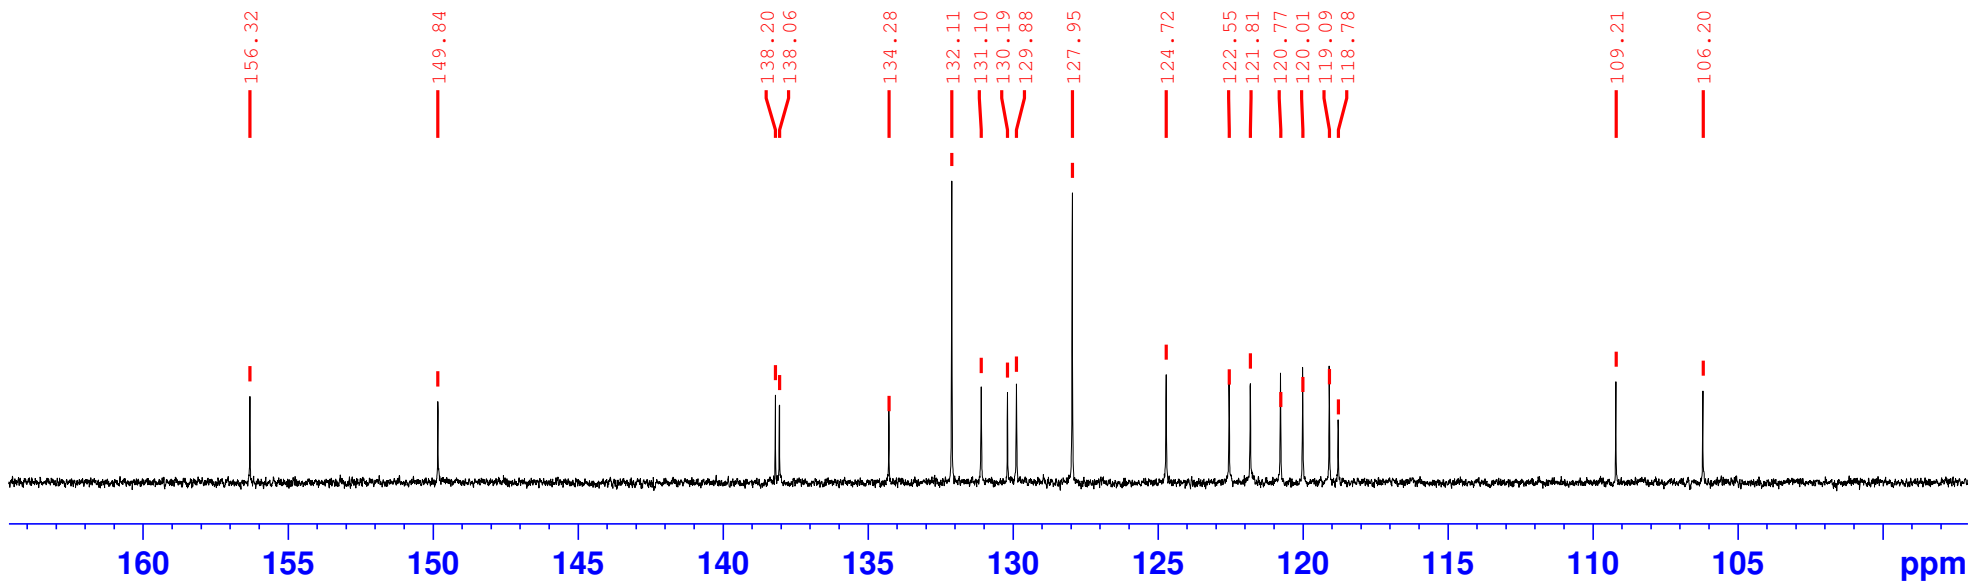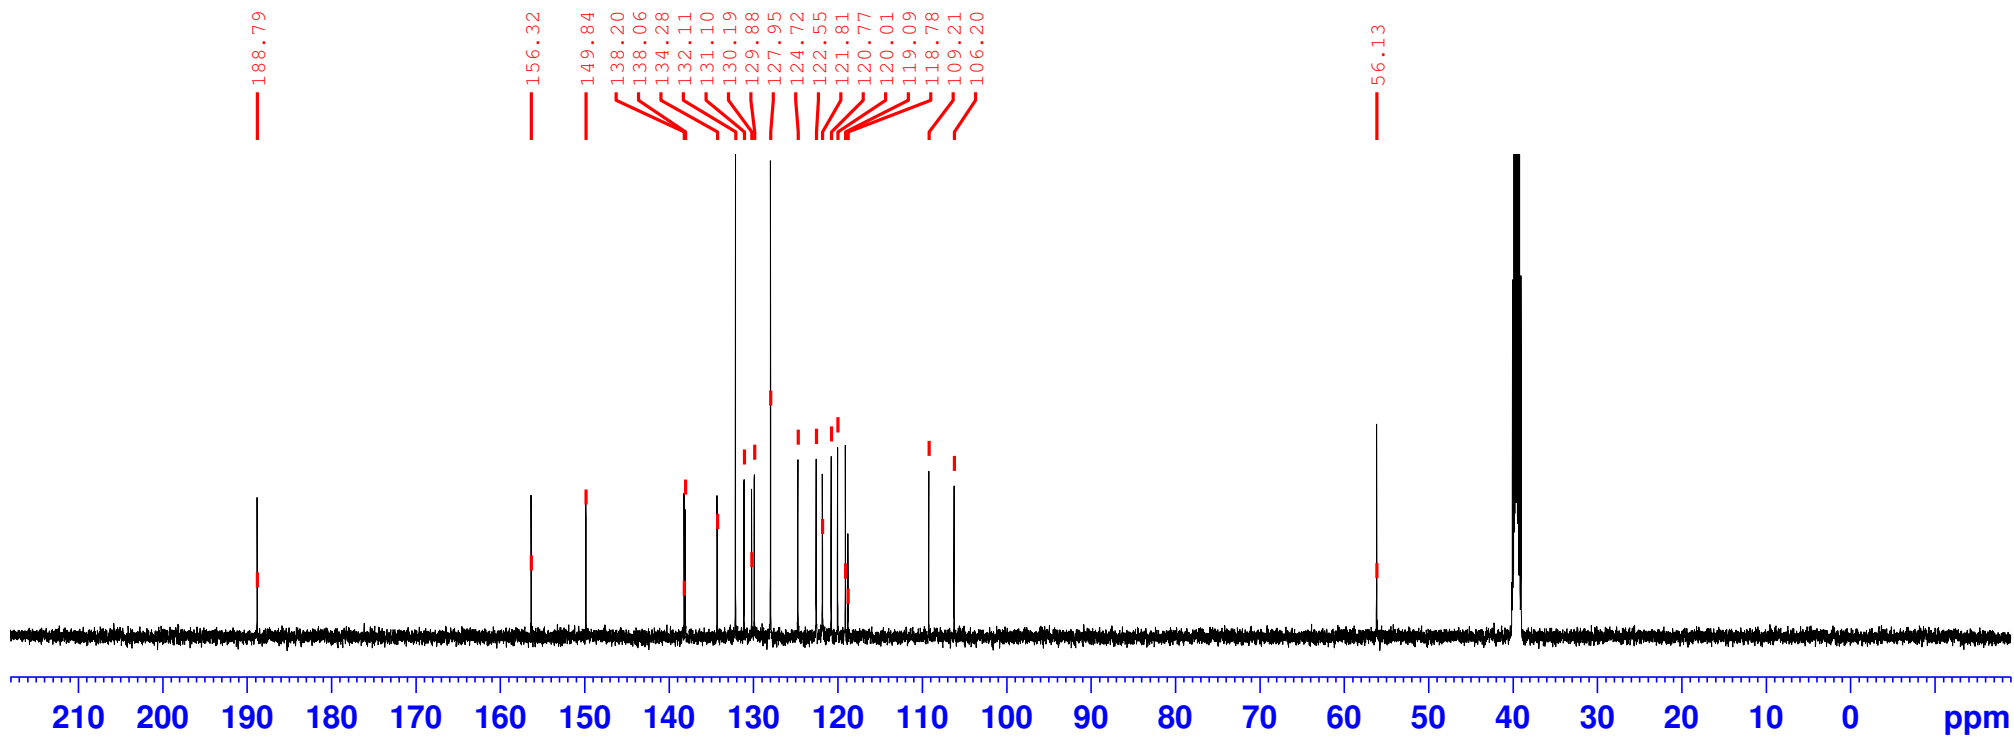

# User Spectrum Plot Report

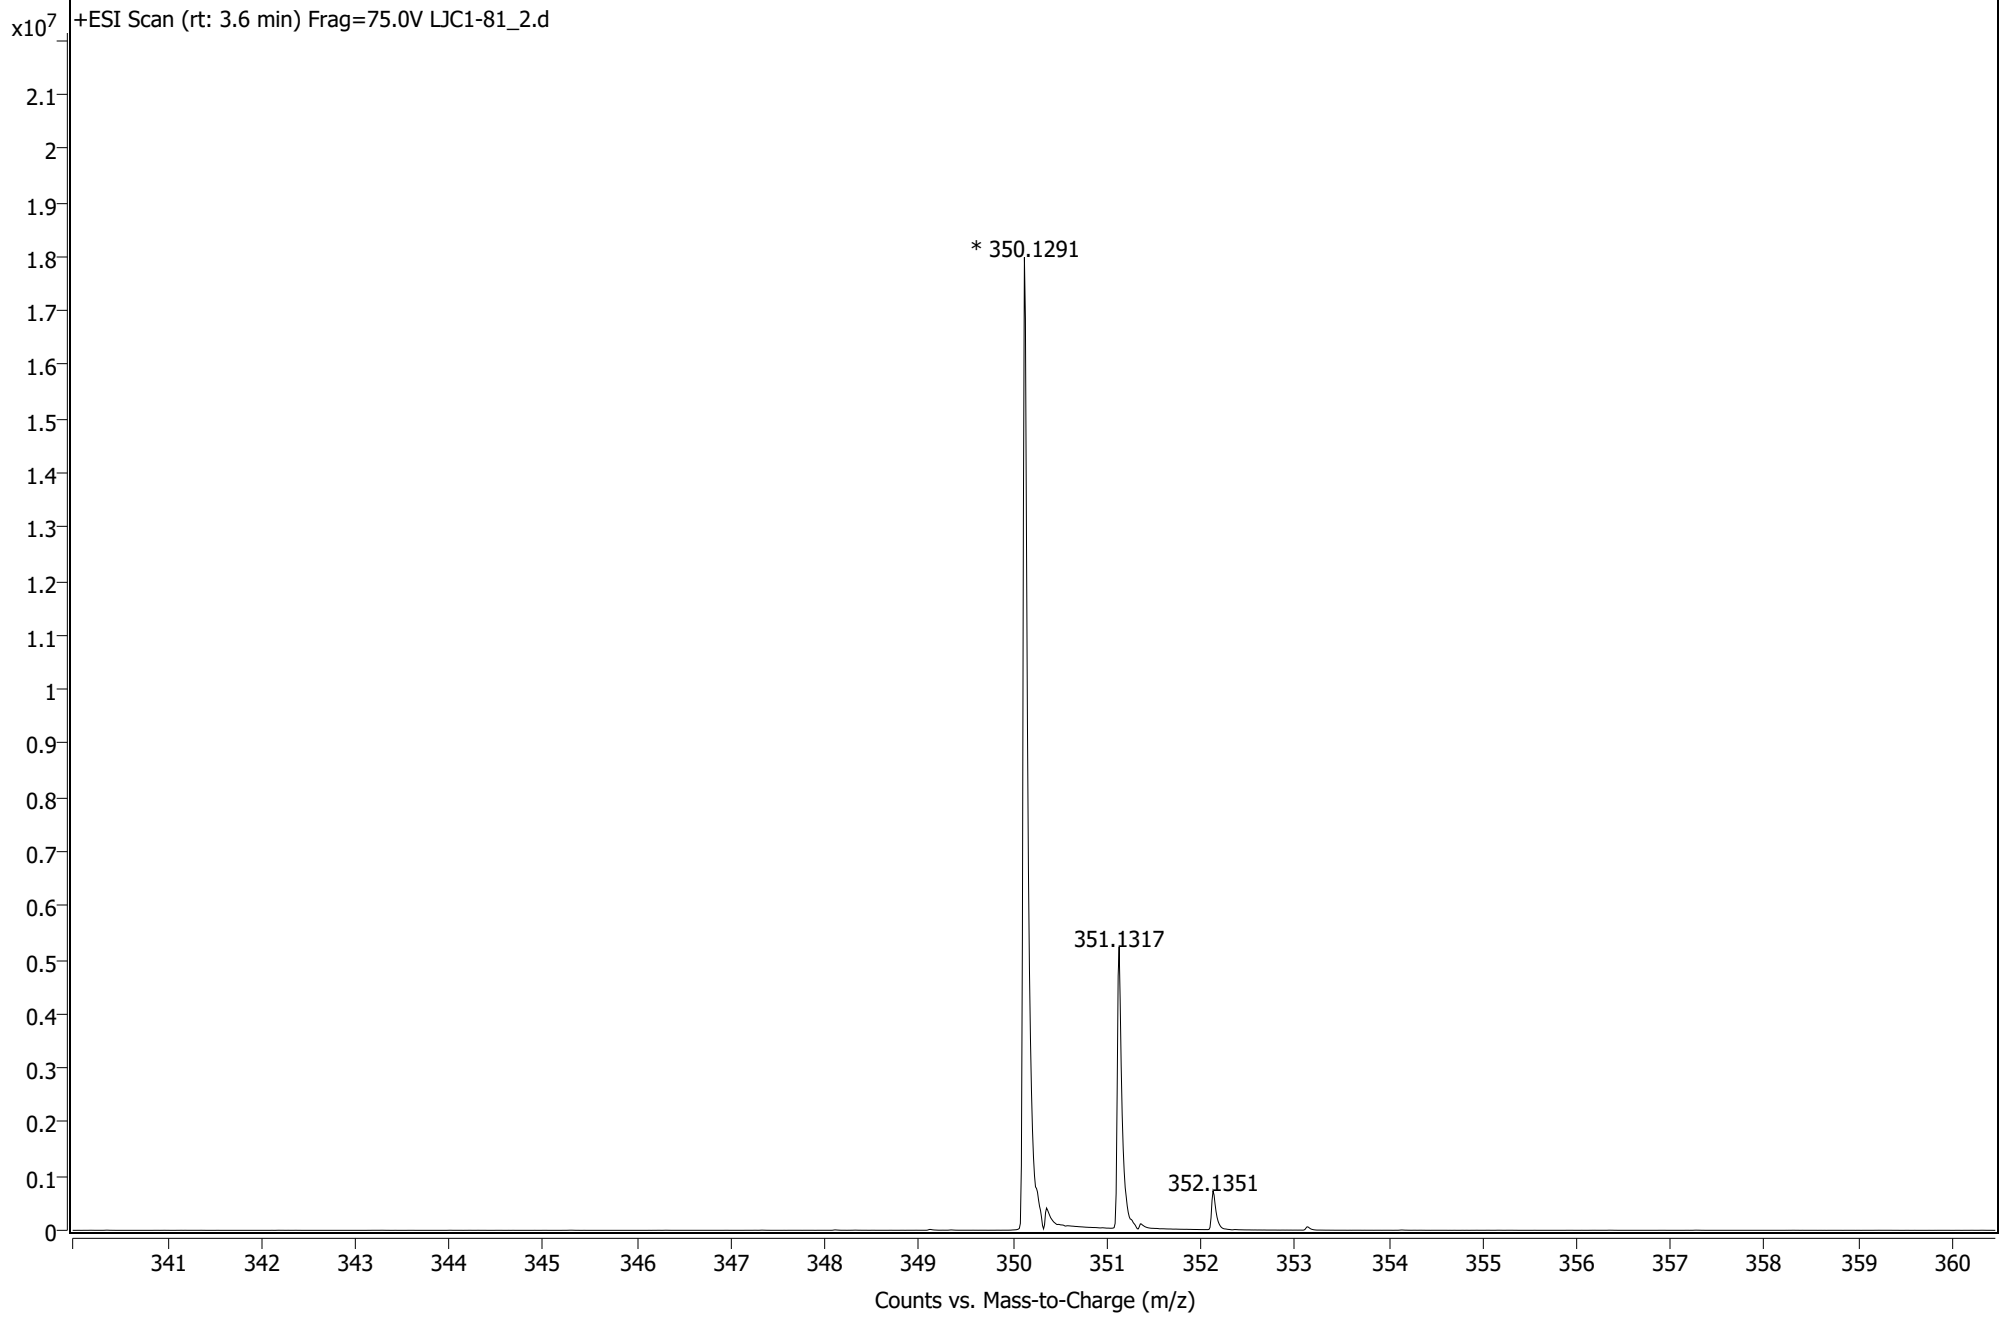

Sample Name: LJC 1-81

```

=====
Acq. Operator   : SYSTEM                      Seq. Line :    7
Acq. Instrument : 1220 HPLC                   Location  :   15
Injection Date  : 10/17/2020 1:30:36 PM      Inj       :    1
                                           Inj Volume: 30.000 µl
Different Inj Volume from Sample Entry! Actual Inj Volume : 50.000 µl
Method          : C:\Chem32\1\Data\luana 2020-10-17 10-44-33\MOHAMED-SMALL MOLECULE.M (
                Sequence Method)
Last changed    : 10/17/2020 11:15:13 AM by SYSTEM
Method Info     : Water/MeOH

Sample Info     : LJC 1-81
    
```

Additional Info : Peak(s) manually integrated

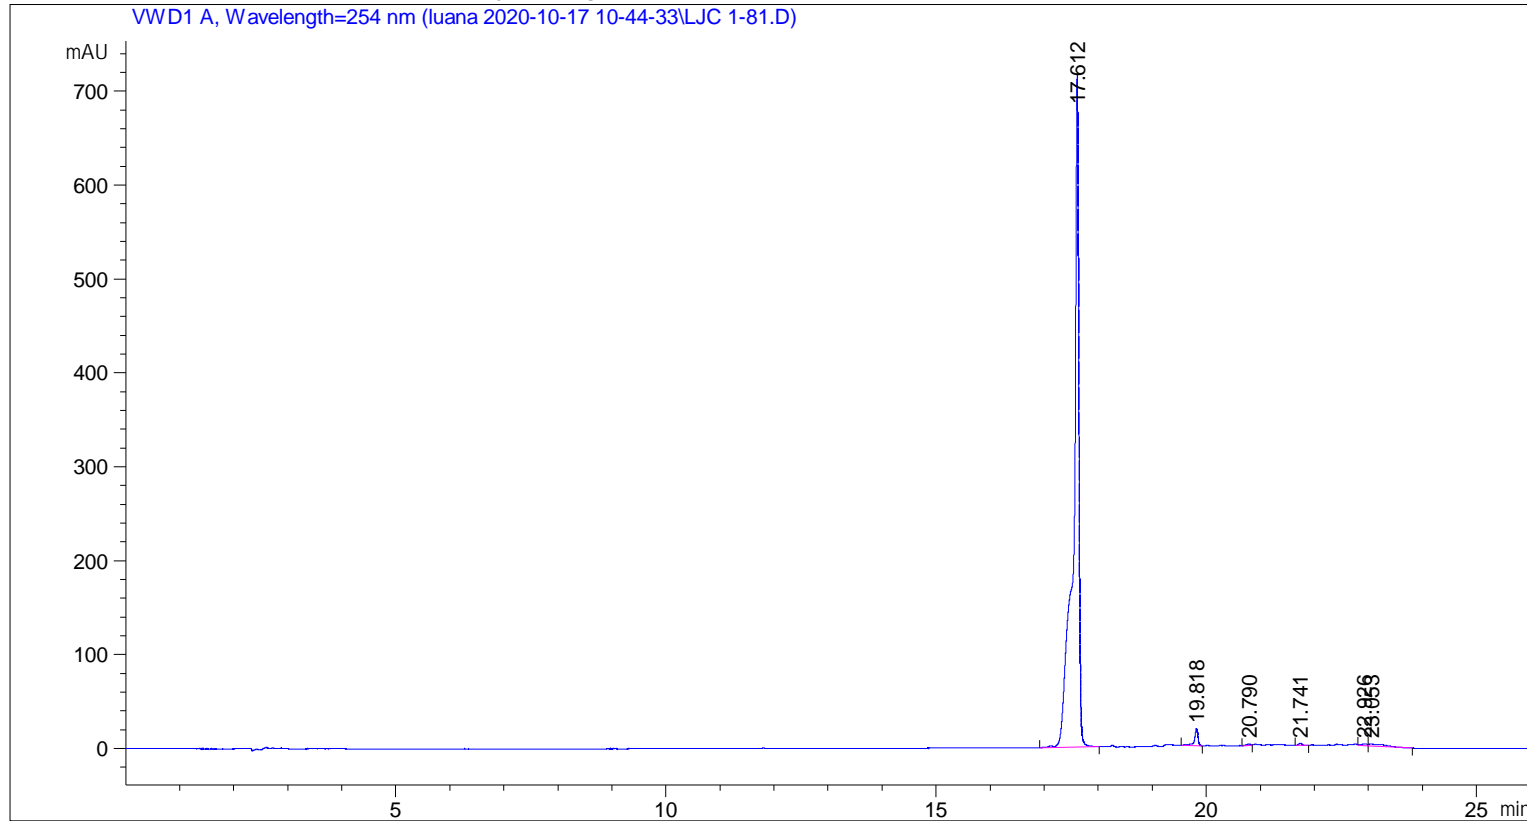

Area Percent Report

```

Sorted By      : Signal
Multiplier     : 1.0000
Dilution      : 1.0000
Use Multiplier & Dilution Factor with ISTDs
    
```

Signal 1: VWD1 A, Wavelength=254 nm

| Peak # | RetTime [min] | Type | Width [min] | Area [mAU*s] | Height [mAU] | Area %  |
|--------|---------------|------|-------------|--------------|--------------|---------|
| 1      | 17.612        | VV R | 0.0932      | 4860.79980   | 716.14459    | 96.5196 |
| 2      | 19.818        | VB R | 0.0682      | 85.58815     | 18.43436     | 1.6995  |
| 3      | 20.790        | BV   | 0.0759      | 10.26132     | 1.85938      | 0.2038  |
| 4      | 21.741        | BV R | 0.0662      | 10.21728     | 2.30685      | 0.2029  |



| Peak # | RetTime [min] | Type | Width [min] | Area [mAU*s] | Height [mAU] | Area % |
|--------|---------------|------|-------------|--------------|--------------|--------|
| 5      | 22.926        | VV   | 0.1234      | 18.14906     | 1.74426      | 0.3604 |
| 6      | 23.053        | VB   | 0.2912      | 51.05789     | 2.06357      | 1.0138 |

Totals :                           5036.07350   742.55301

=====  
\*\*\* End of Report \*\*\*

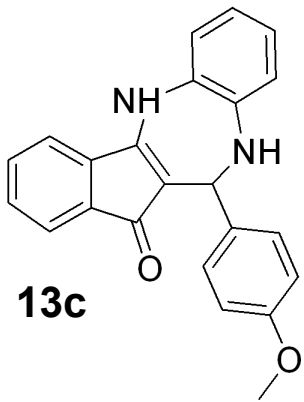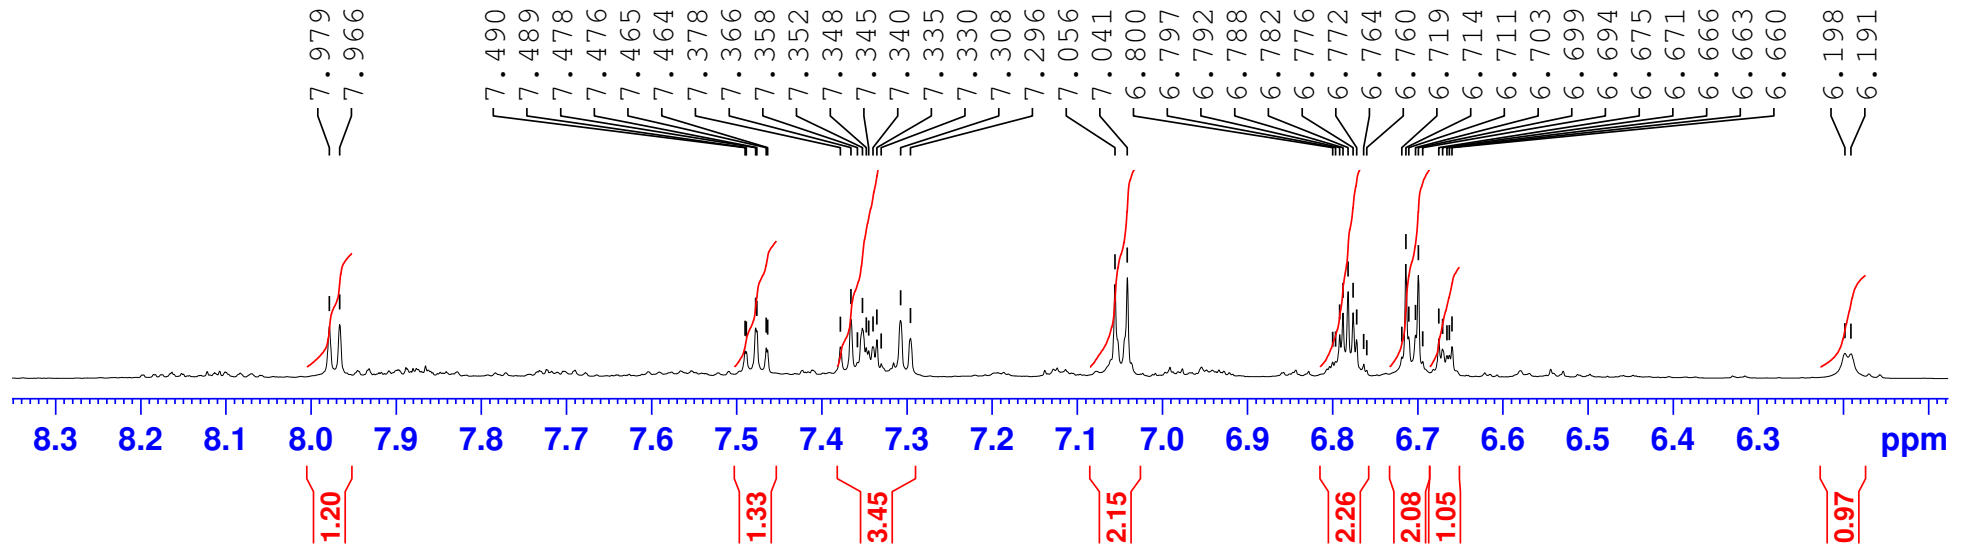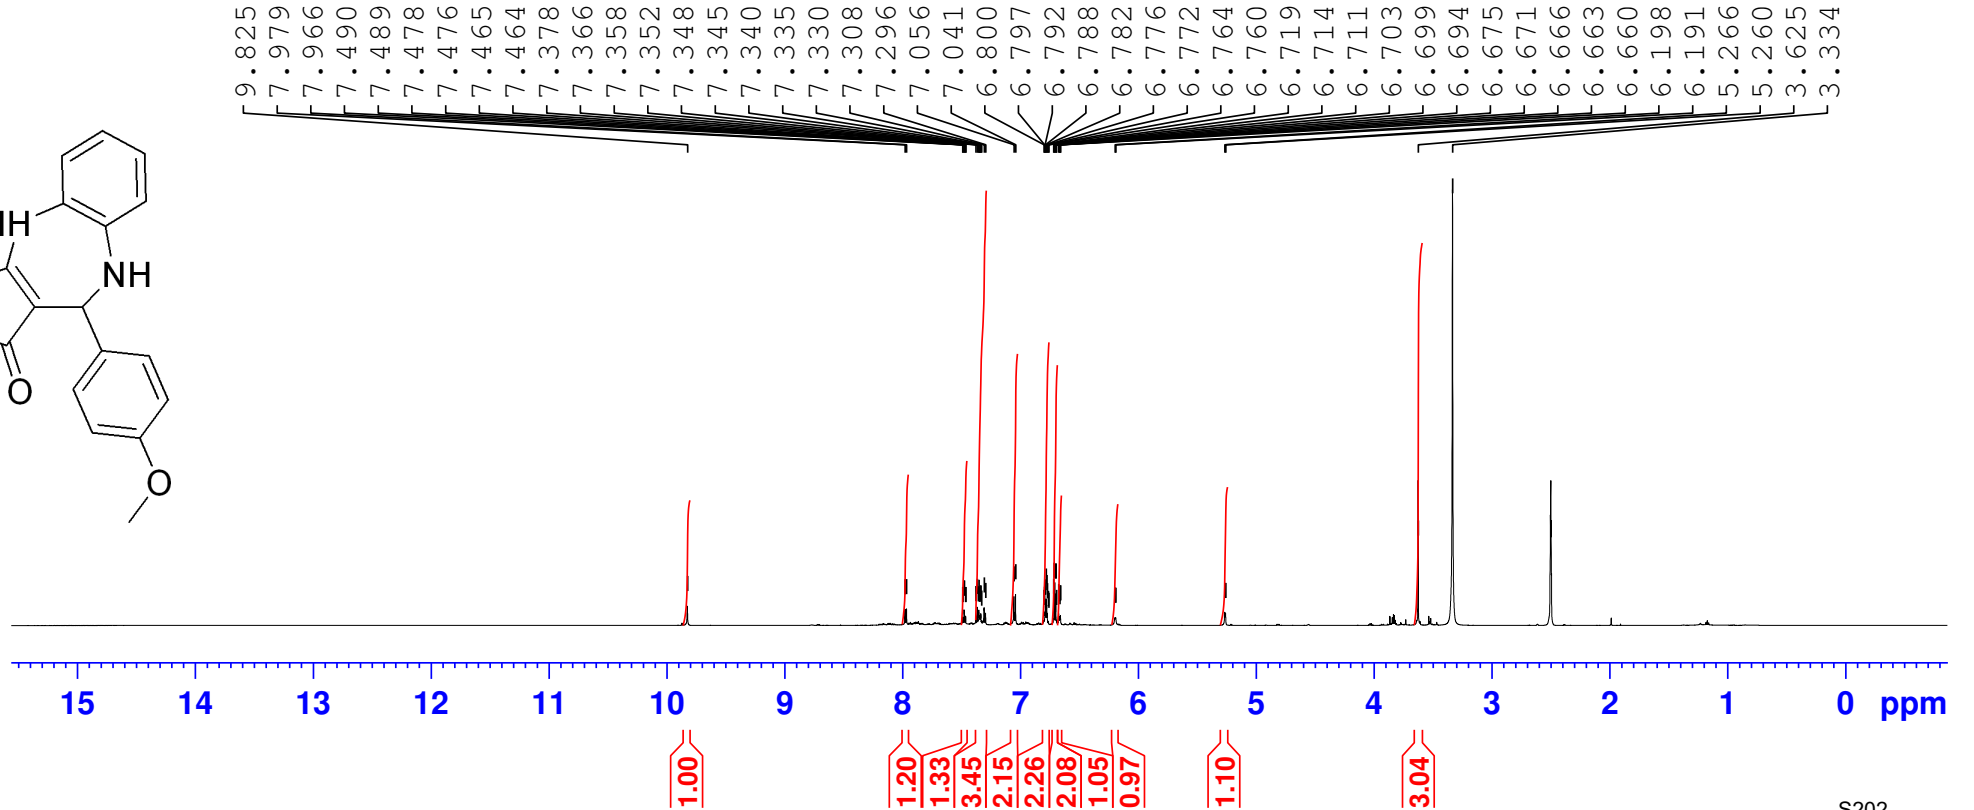

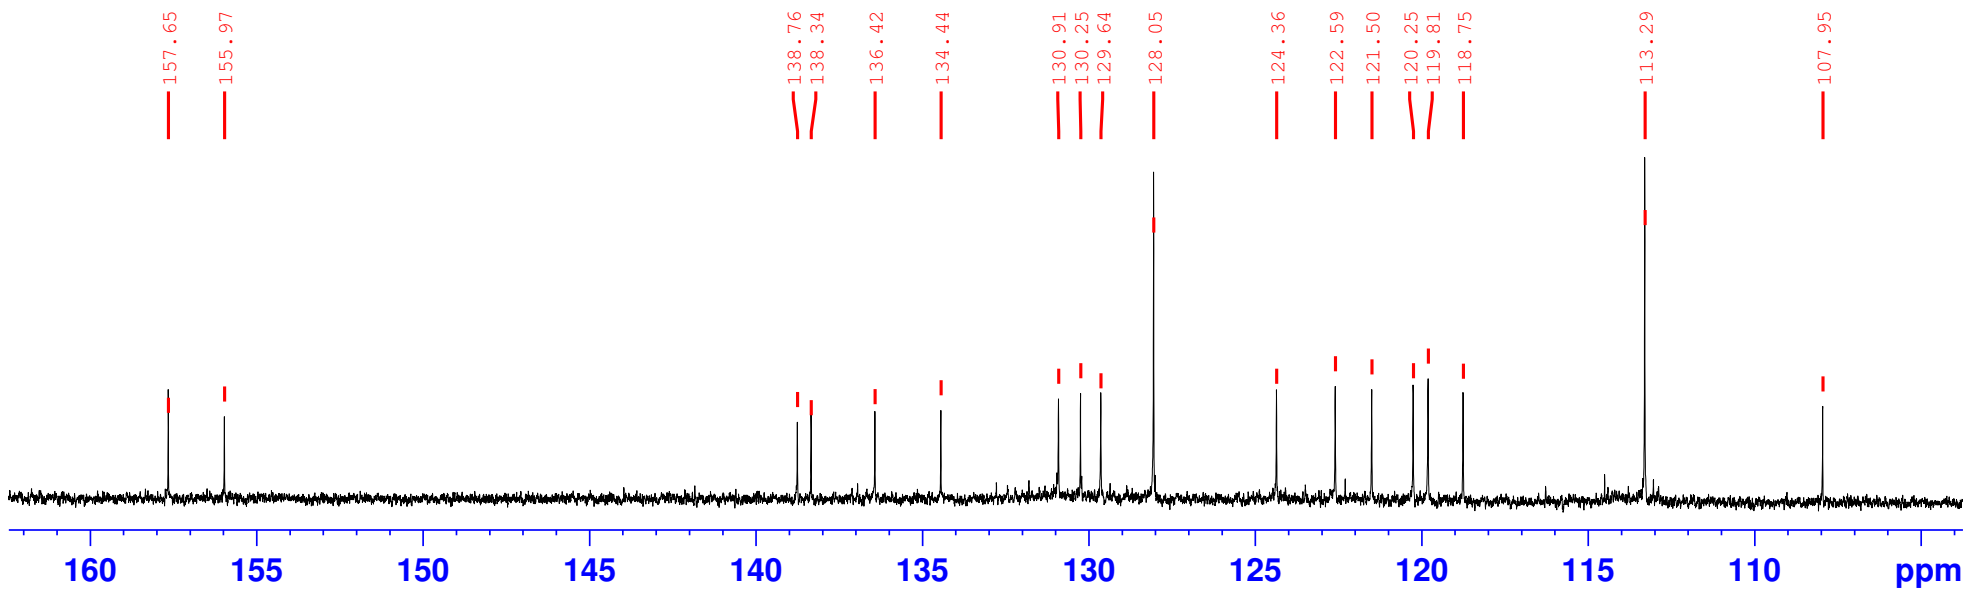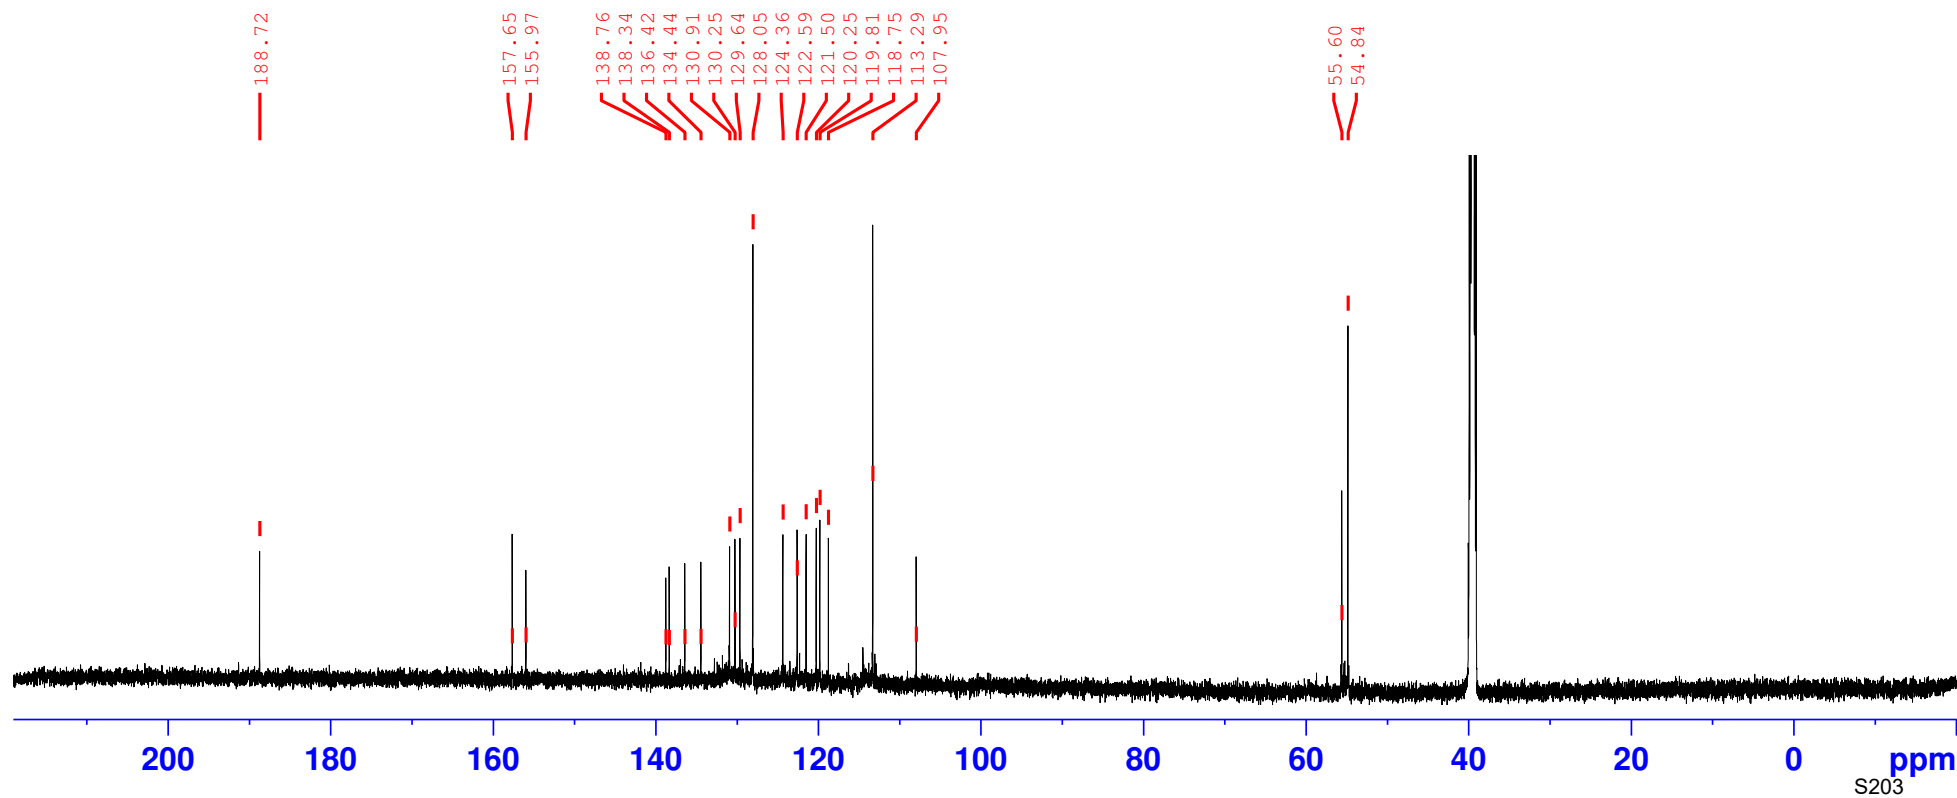

LJC-1-74 45 (0.756) Cm (3:120)

Scan ES+  
377.2529 6.37e6

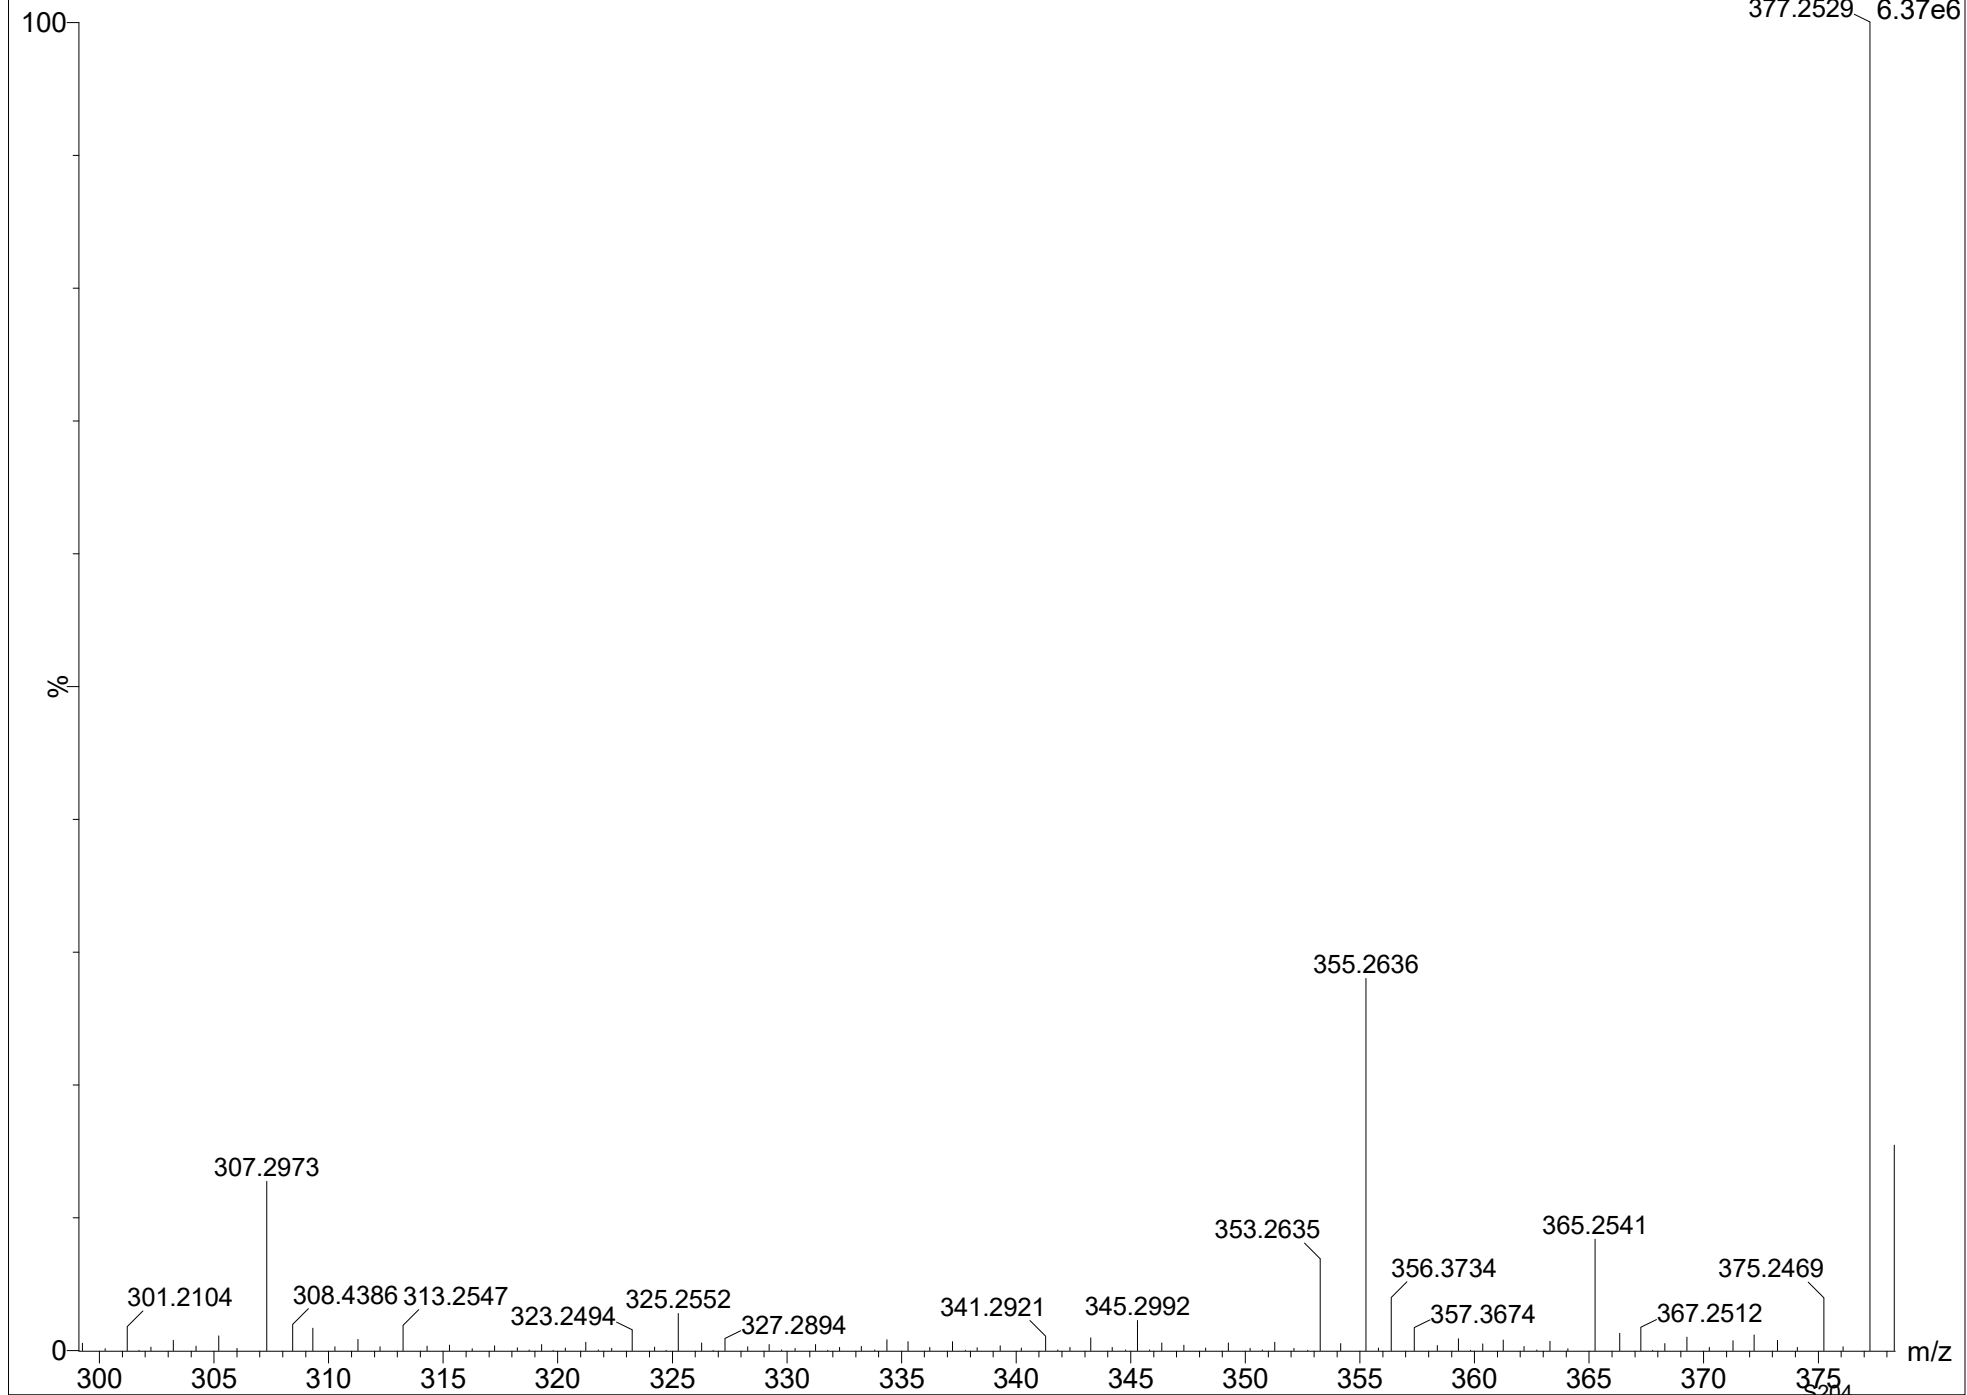

Sample Name: LJC1--74

```

=====
Acq. Operator   : SYSTEM                      Seq. Line :    6
Acq. Instrument : 1220 HPLC                    Location  :   14
Injection Date  : 10/10/2020 12:03:24 PM      Inj       :    1
                                           Inj Volume: 30.000 µl
Different Inj Volume from Sample Entry! Actual Inj Volume : 50.000 µl
Method          : C:\Chem32\1\Data\luana 2020-10-10 09-45-18\MOHAMED-SMALL MOLECULE.M (
                Sequence Method)
Last changed    : 10/10/2020 10:17:41 AM by SYSTEM
Method Info     : Water/MeOH

Sample Info     : LJC1--74
  
```

Additional Info : Peak(s) manually integrated

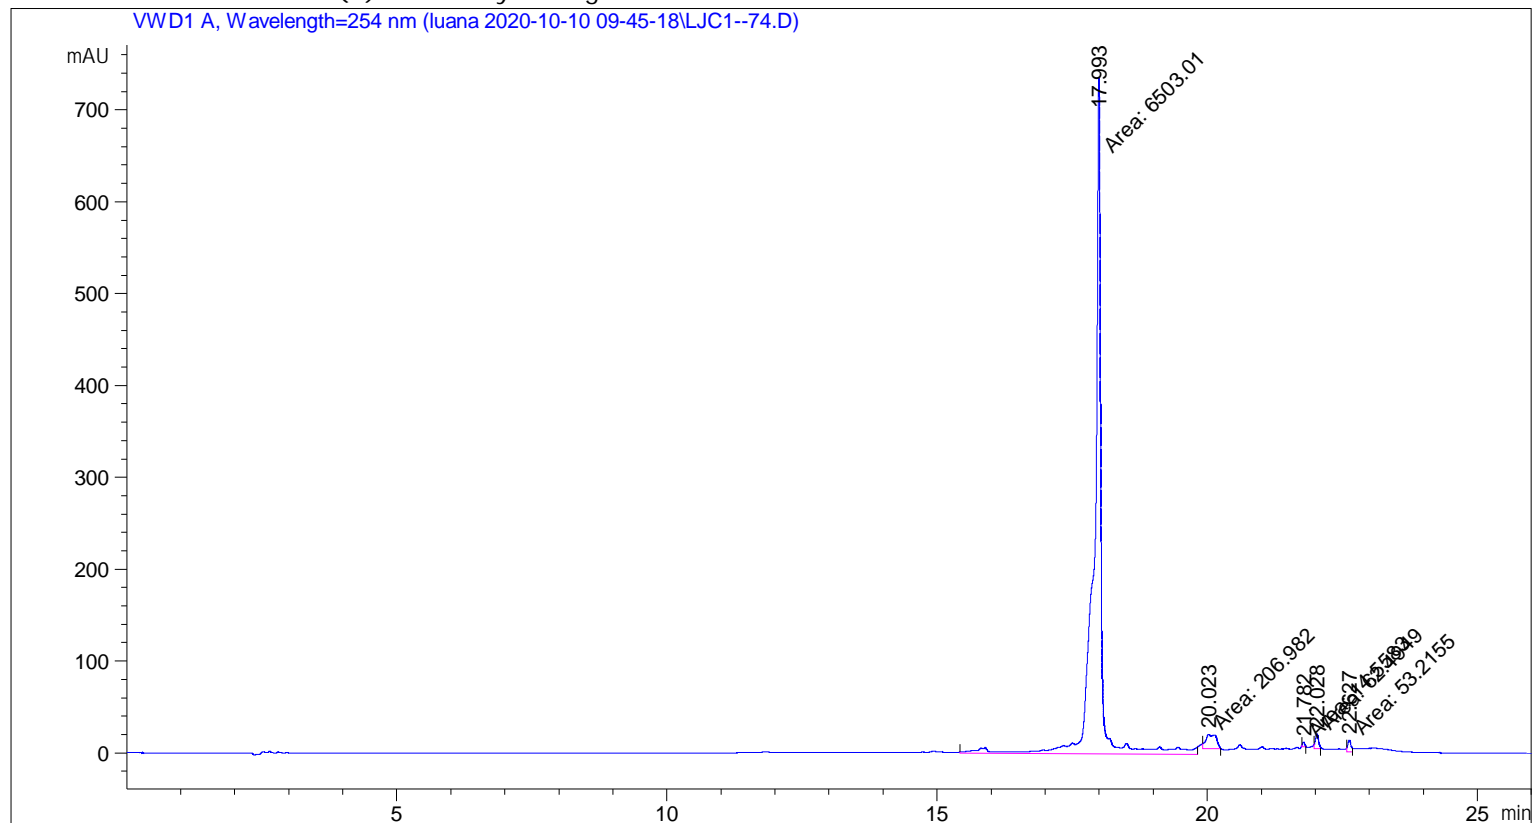

```

=====
                          Area Percent Report
=====
  
```

```

Sorted By       :      Signal
Multiplier      :      1.0000
Dilution       :      1.0000
Use Multiplier & Dilution Factor with ISTDs
  
```

Signal 1: VWD1 A, Wavelength=254 nm

| Peak # | RetTime [min] | Type | Width [min] | Area [mAU*s] | Height [mAU] | Area %  |
|--------|---------------|------|-------------|--------------|--------------|---------|
| 1      | 17.993        | MM   | 0.1474      | 6503.00537   | 735.39545    | 95.0696 |
| 2      | 20.023        | MM   | 0.2217      | 206.98235    | 15.55880     | 3.0259  |
| 3      | 21.782        | MM   | 0.0461      | 14.55834     | 5.26897      | 0.2128  |
| 4      | 22.028        | MM   | 0.0655      | 62.49493     | 15.89236     | 0.9136  |

S205

| Peak # | RetTime [min] | Type | Width [min] | Area [mAU*s] | Height [mAU] | Area % |
|--------|---------------|------|-------------|--------------|--------------|--------|
| 5      | 22.627        | MM   | 0.0677      | 53.21552     | 13.09496     | 0.7780 |

Totals :                           6840.25651   785.21053

=====  
\*\*\* End of Report \*\*\*

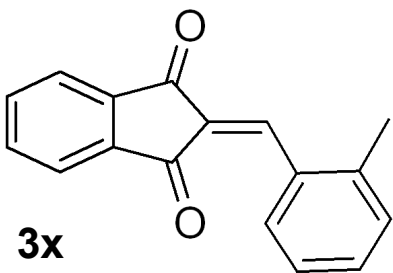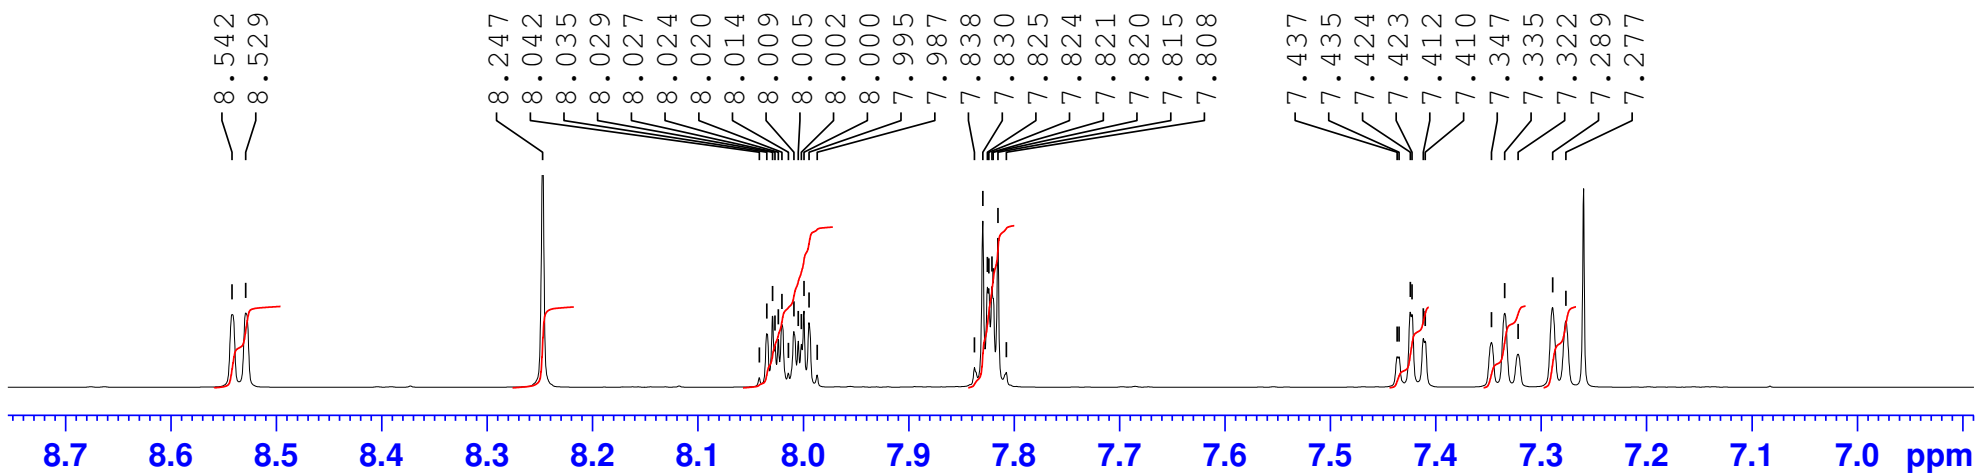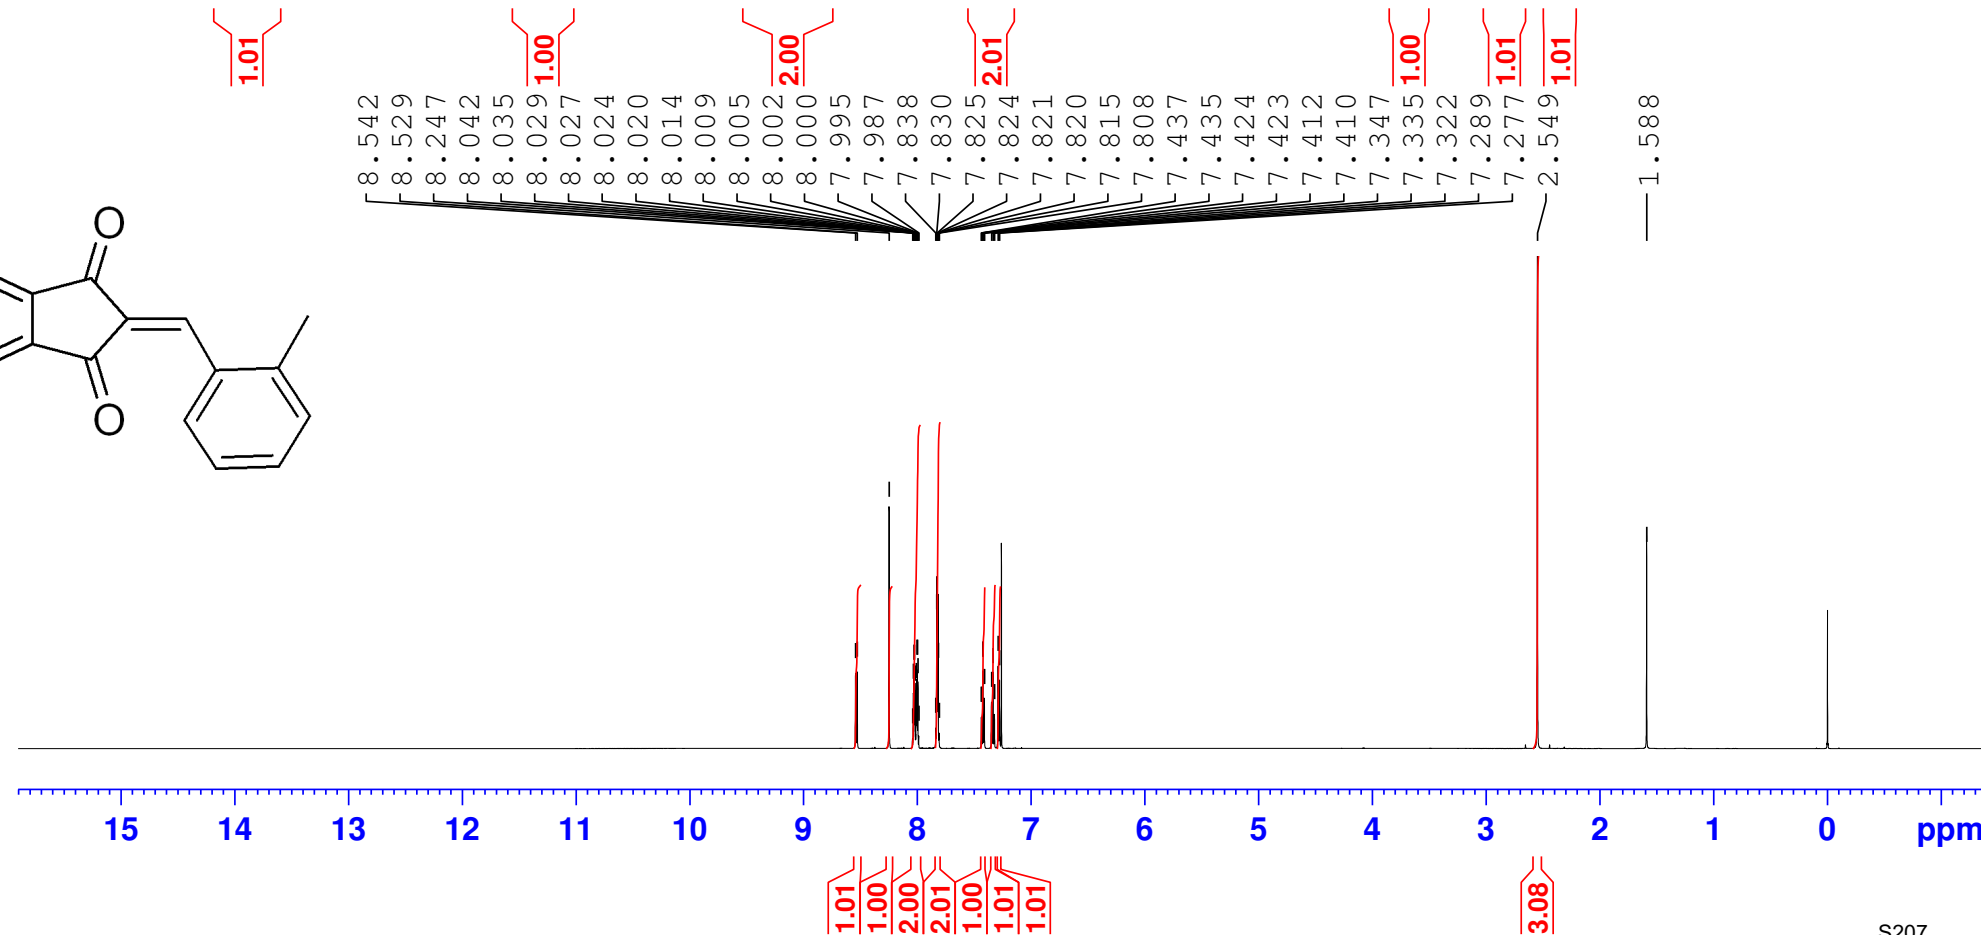

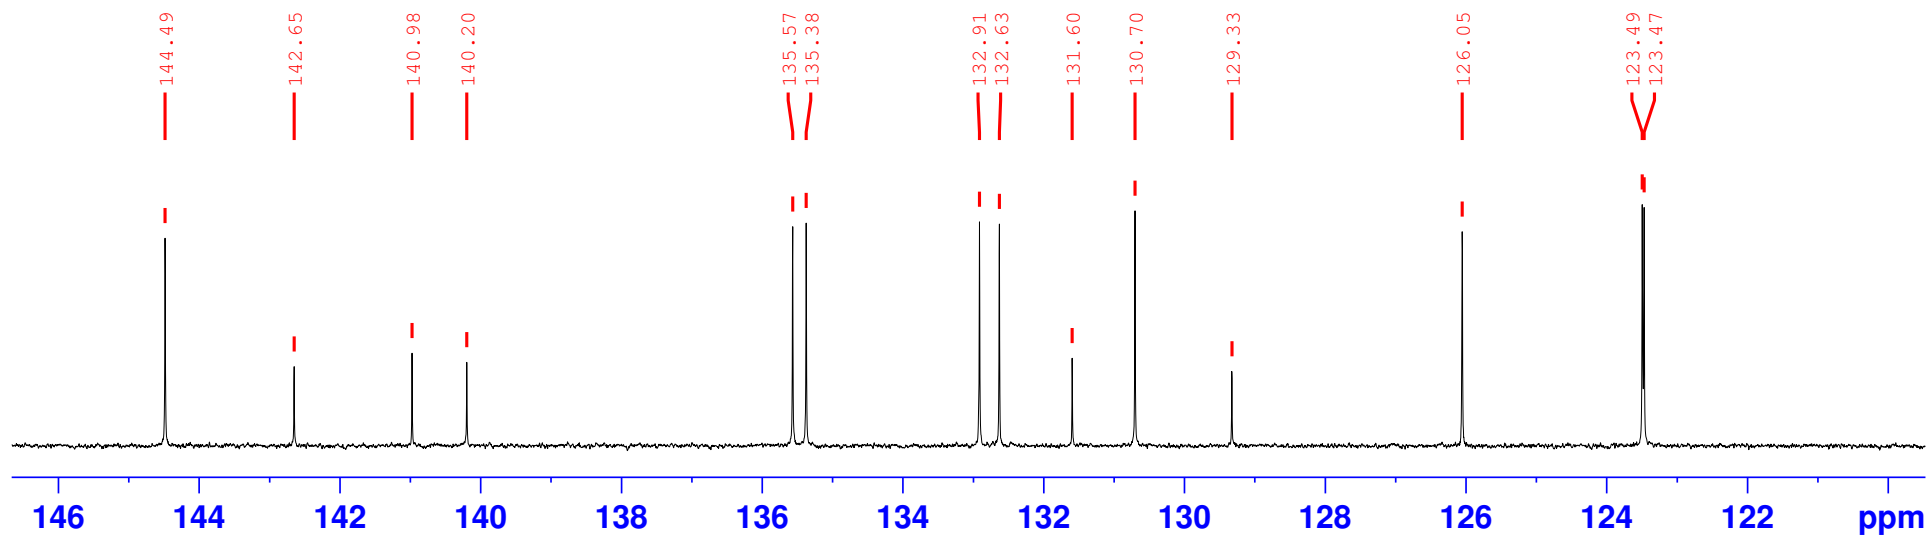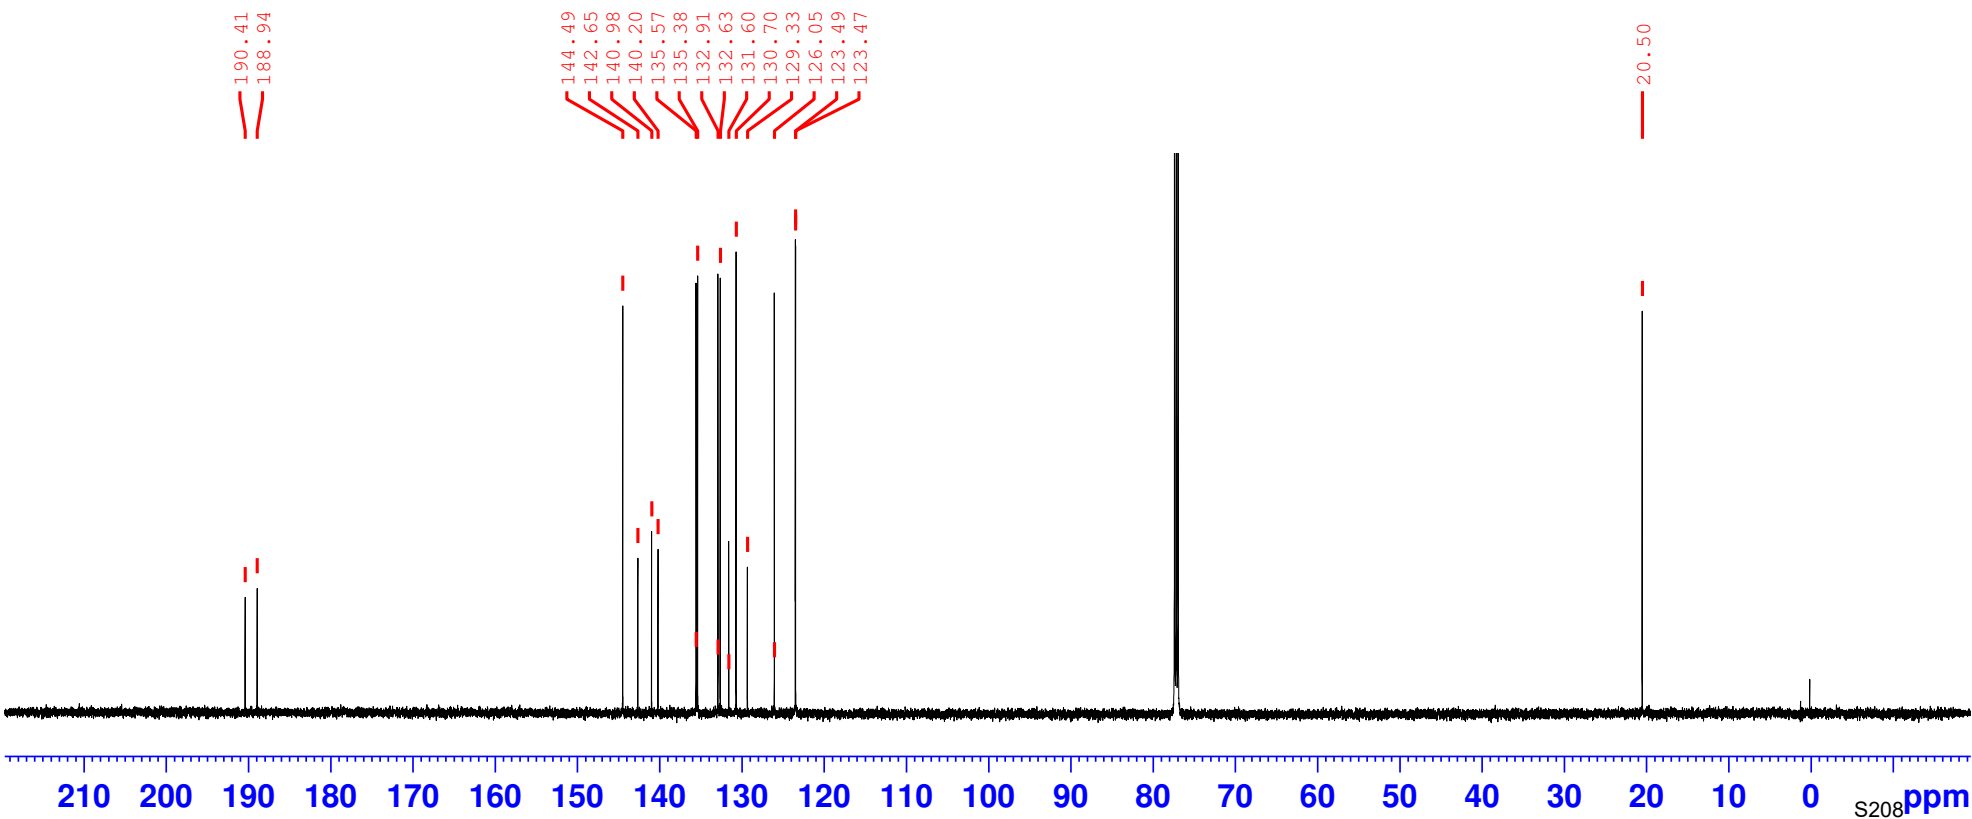



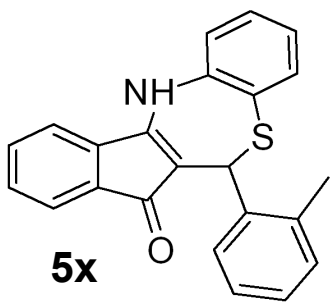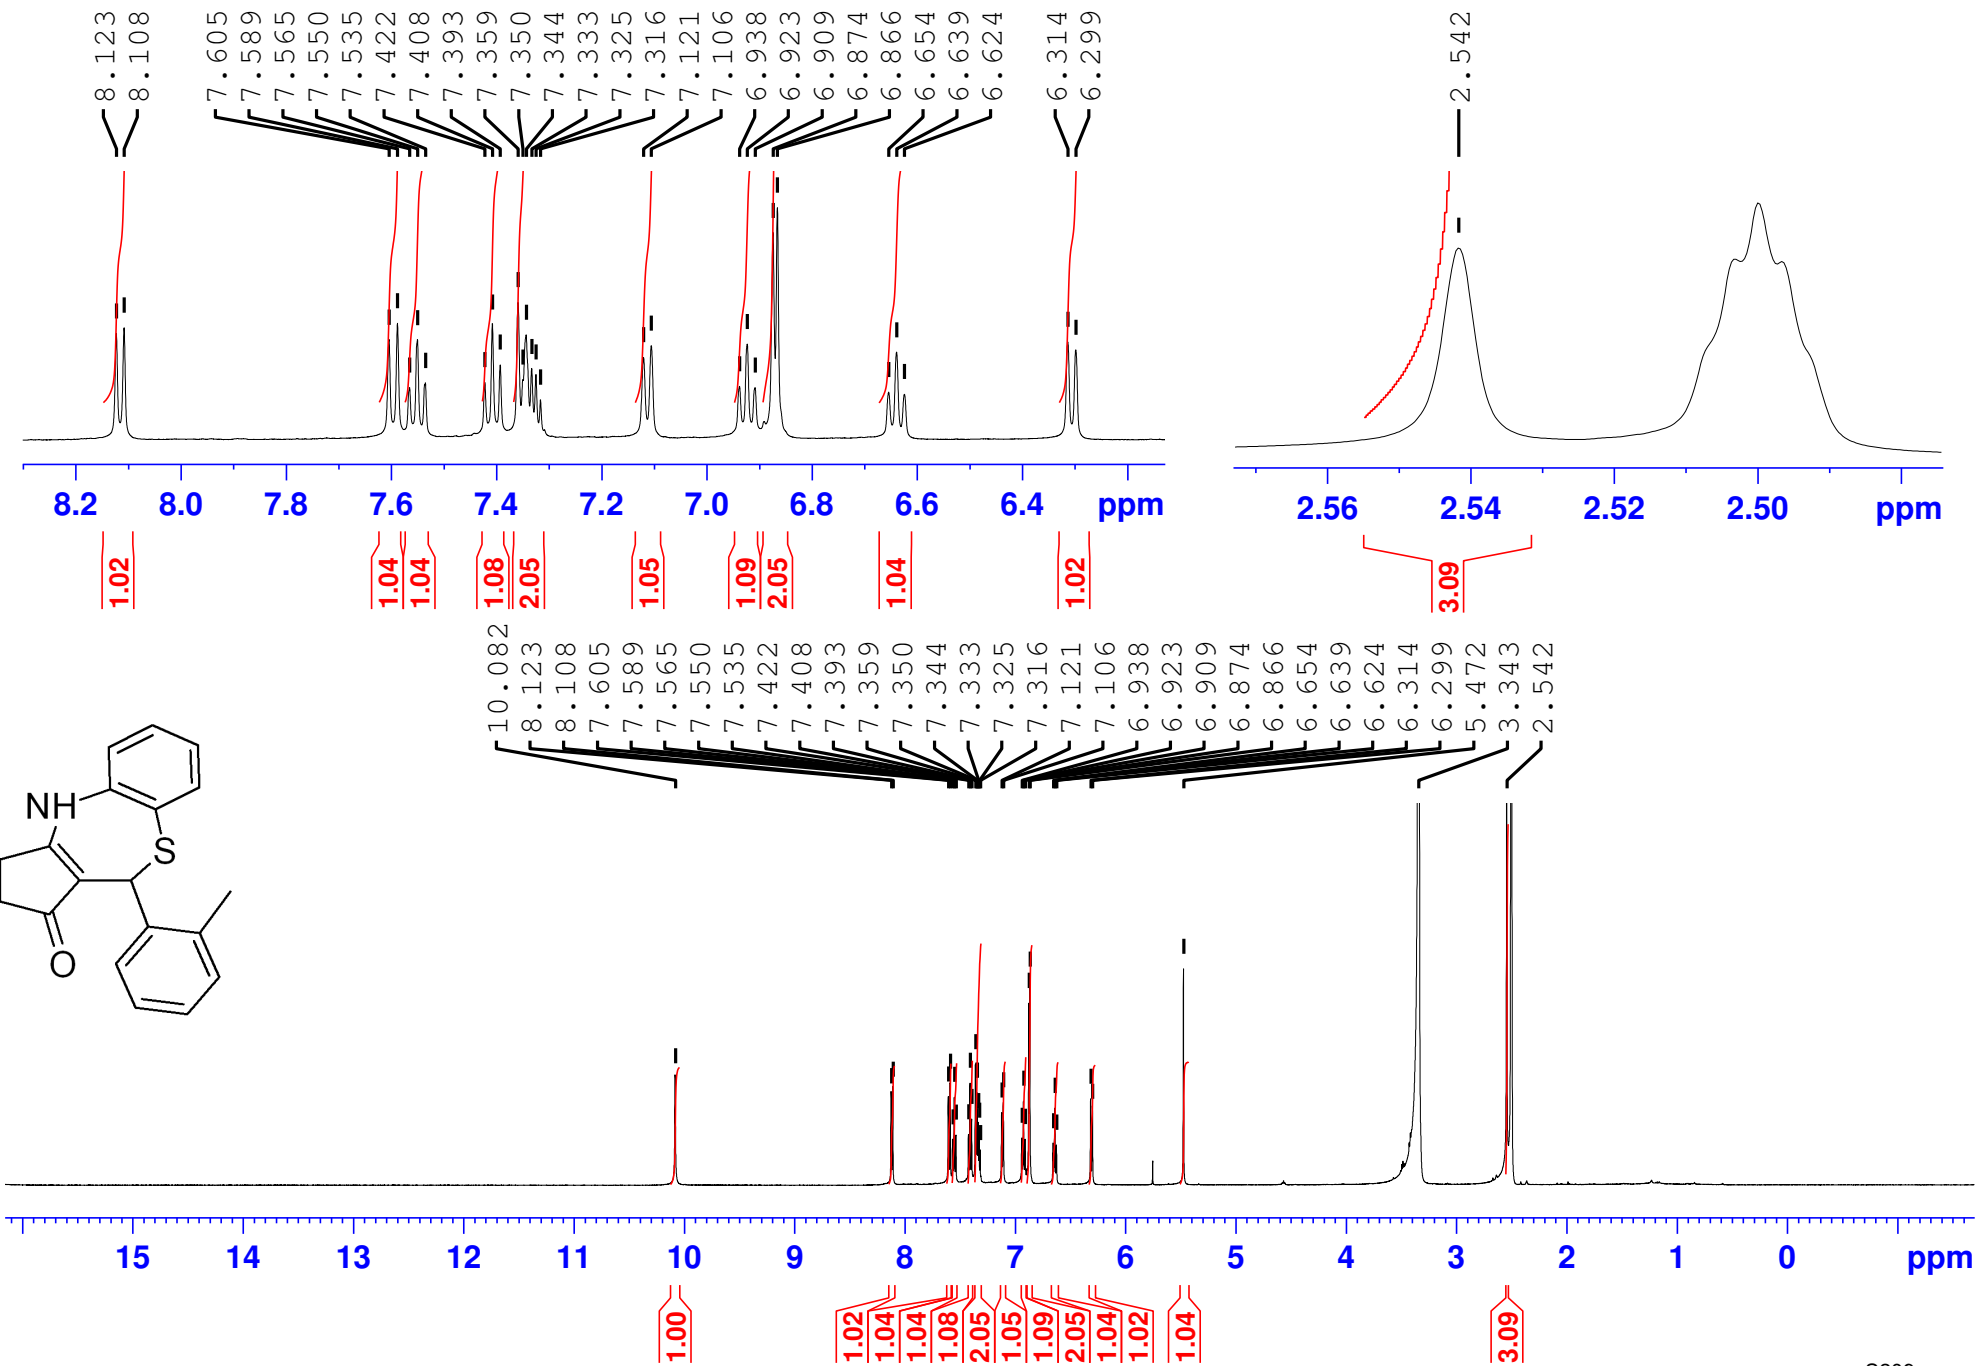

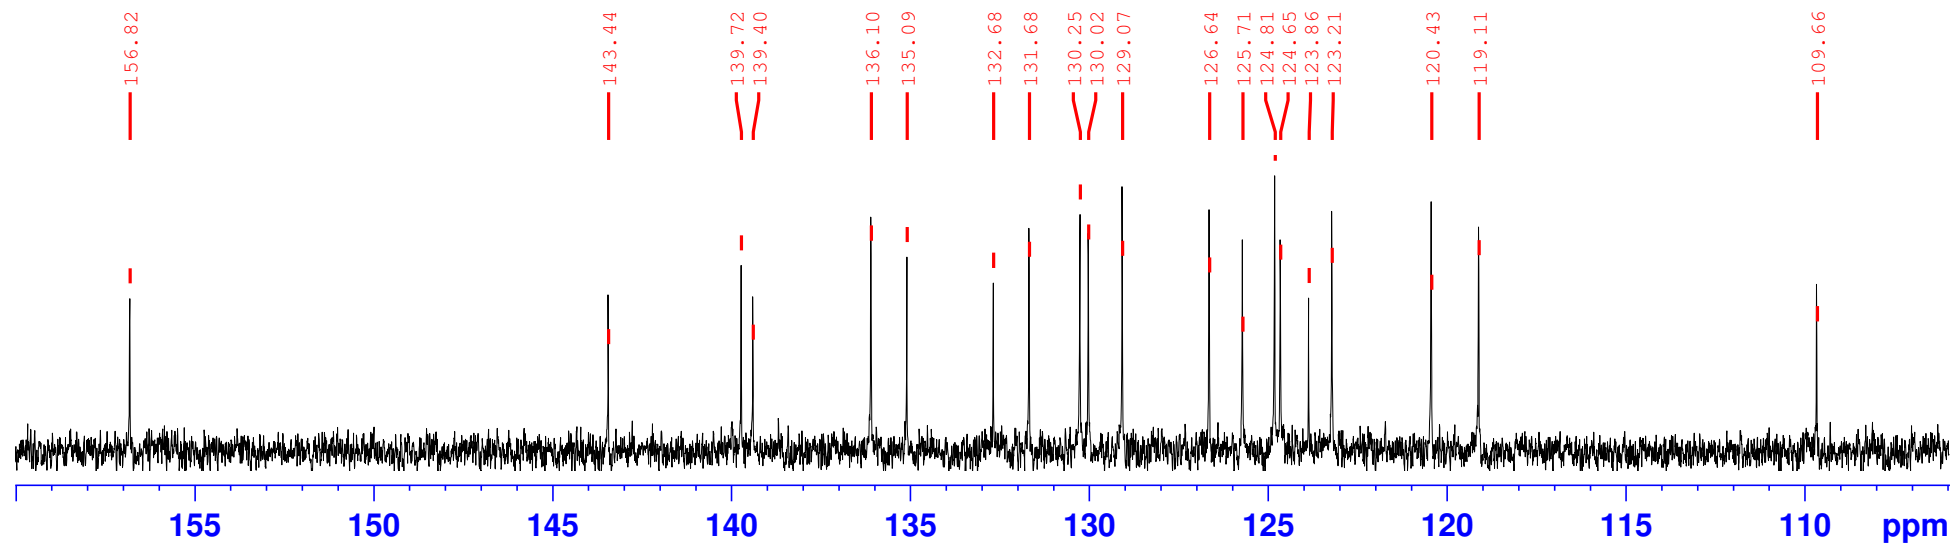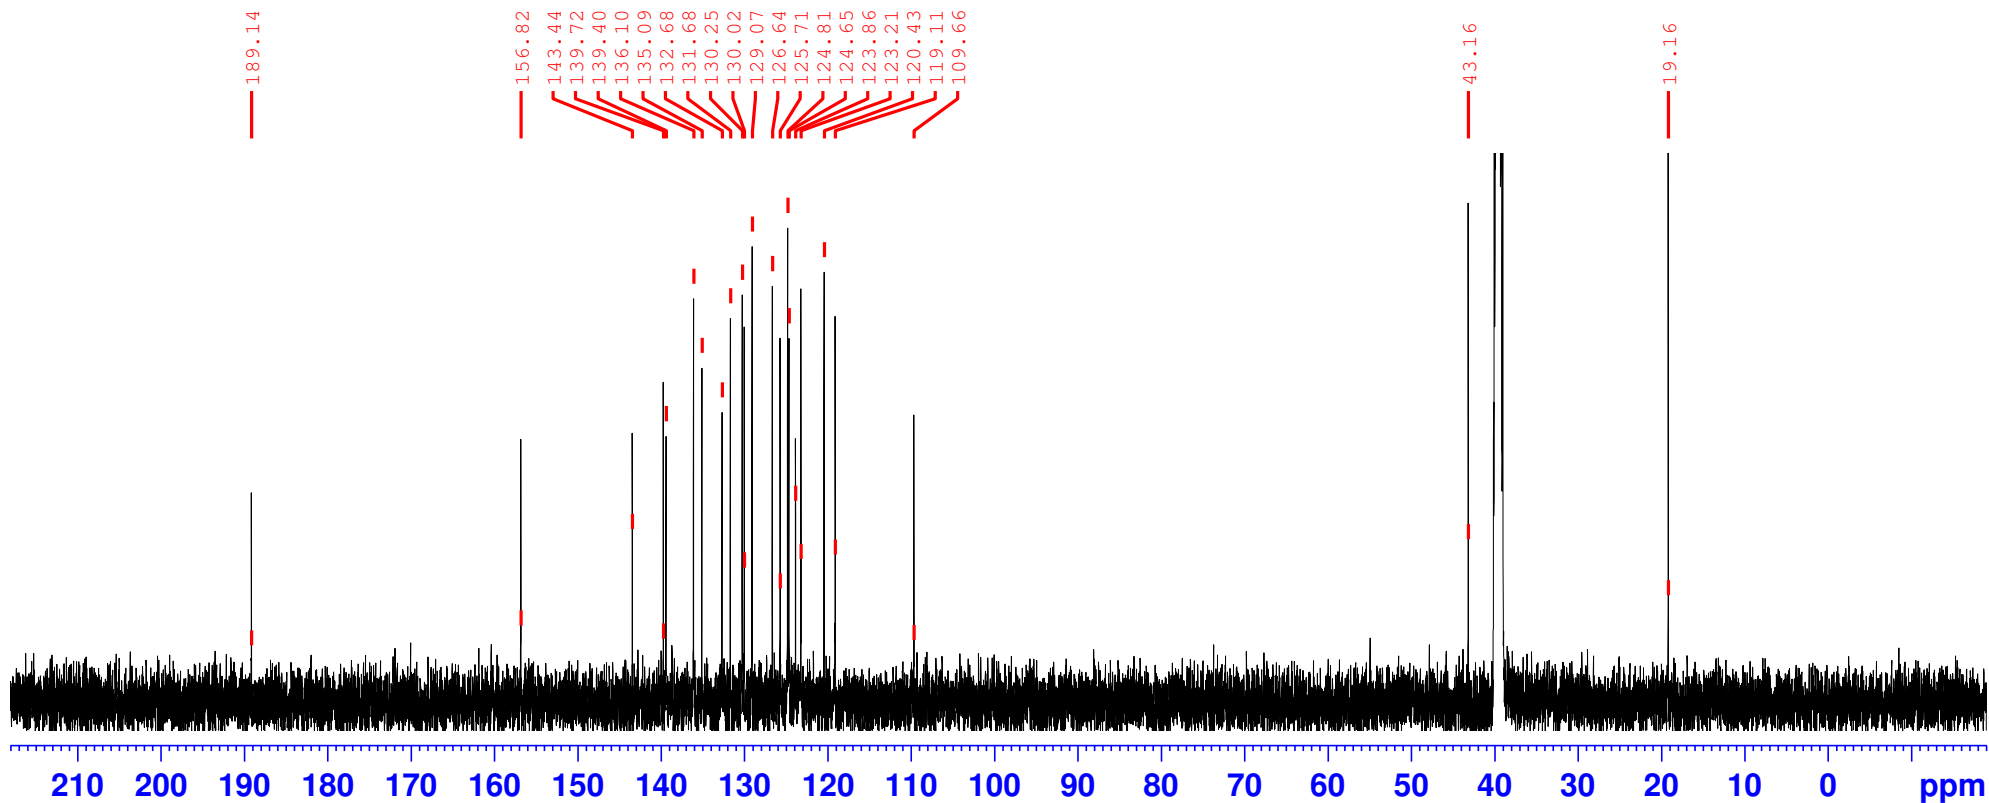

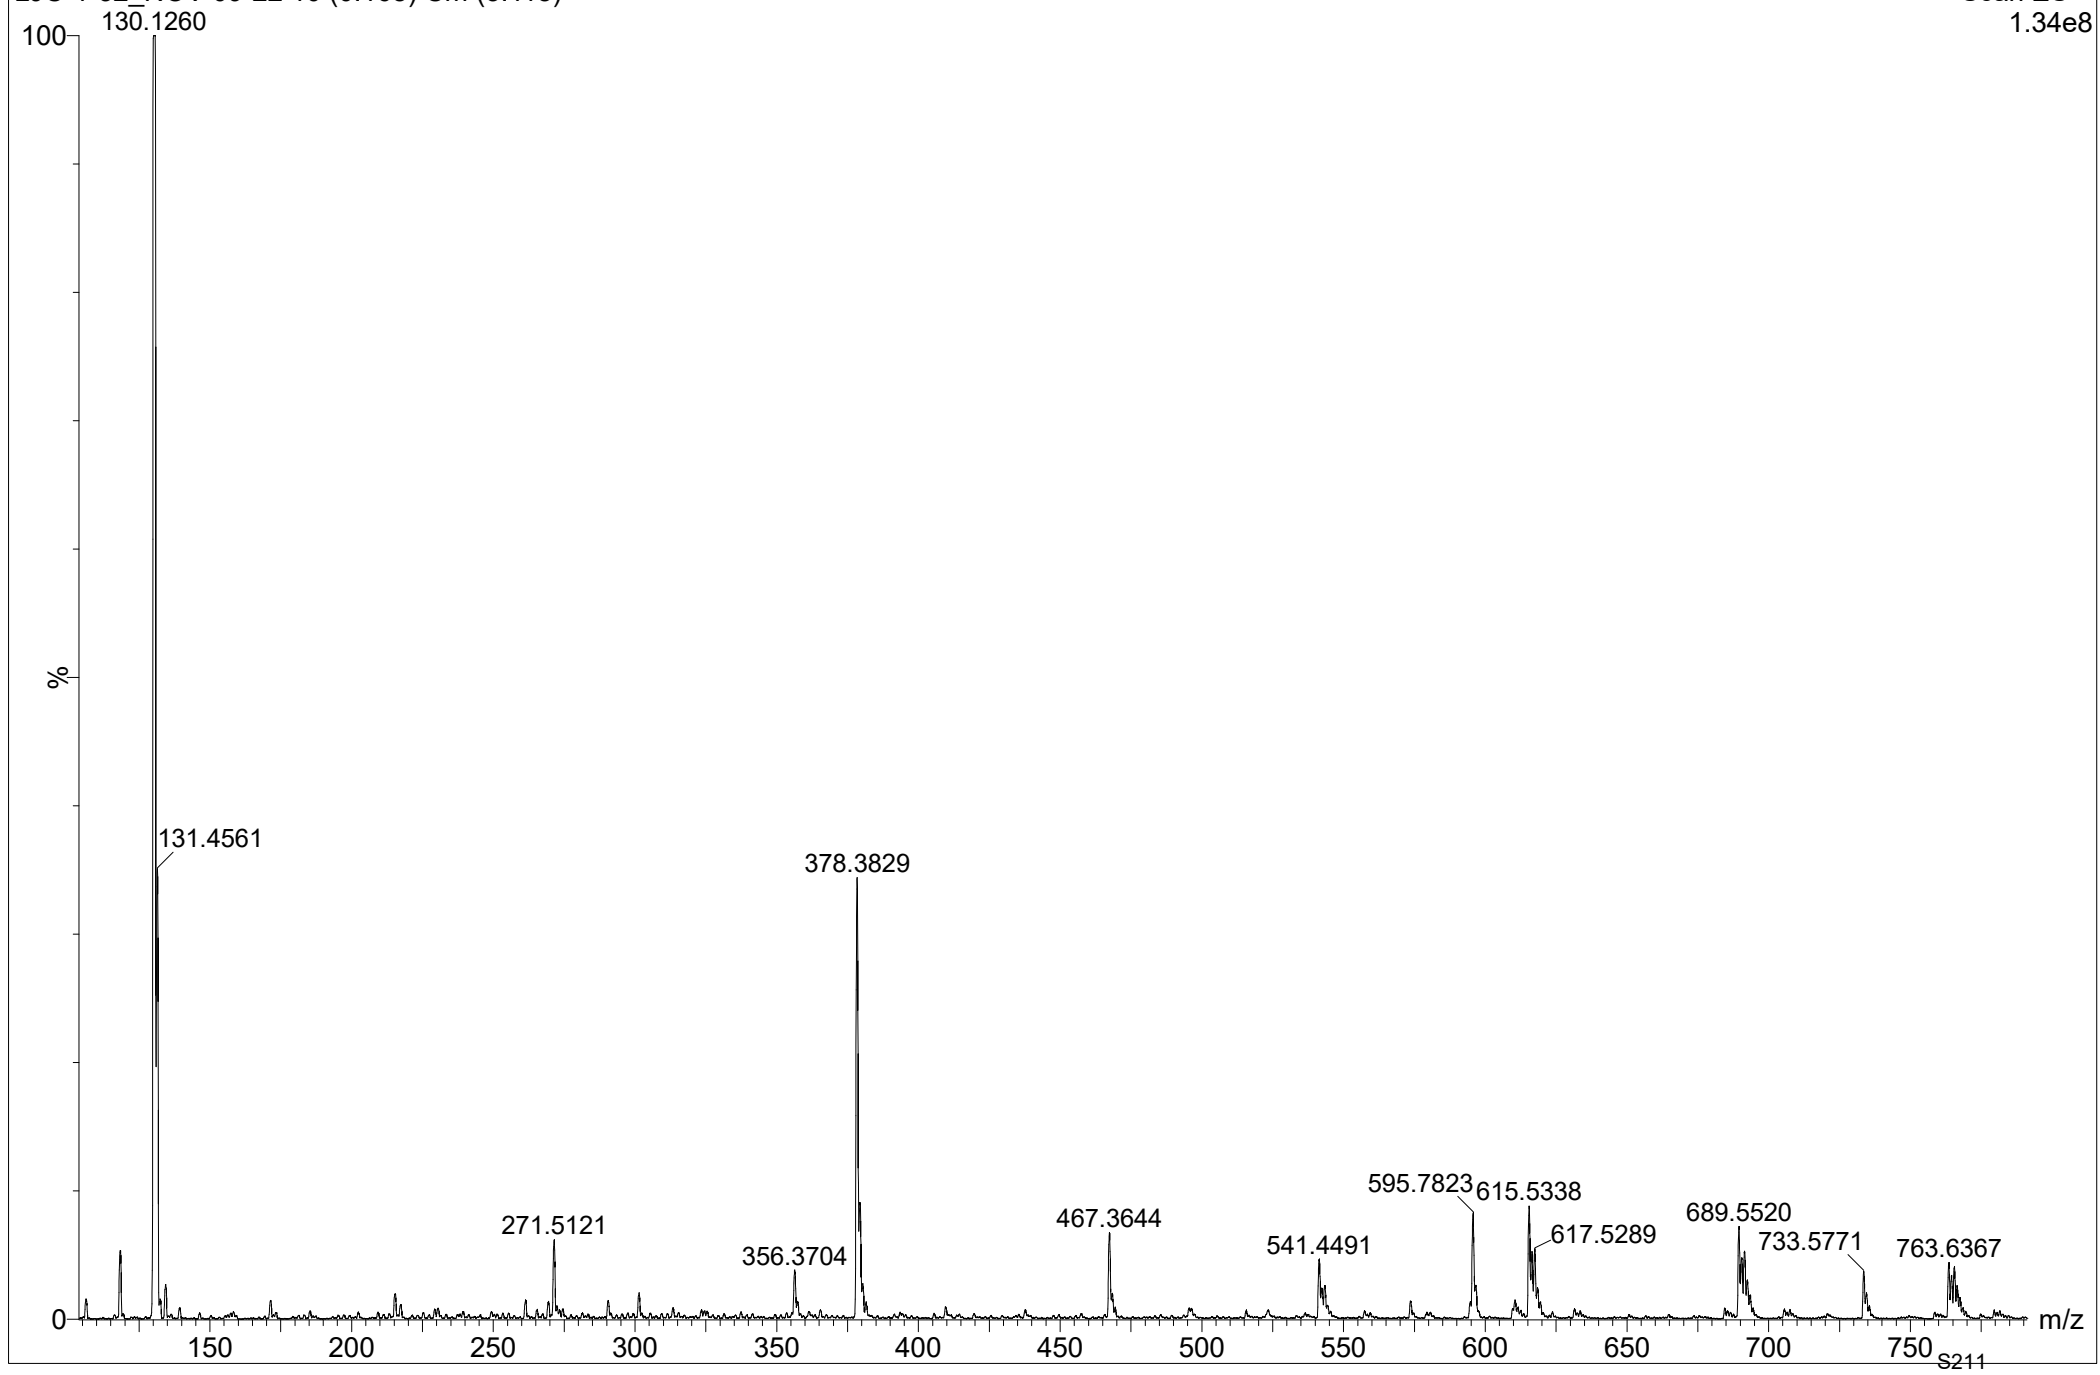

```

=====
Acq. Operator   : SYSTEM                      Seq. Line :    8
Acq. Instrument : 1220 HPLC                    Location  :   87
Injection Date  : 10/13/2022 1:23:21 PM      Inj       :    1
                                           Inj Volume: 70.000 µl
Different Inj Volume from Sample Entry! Actual Inj Volume : 50.000 µl
Method          : C:\Chem32\1\Data\luana 2022-10-13 10-13-01\Luana_small_molecule.M (Sequence
                :                               Method)
Last changed    : 10/13/2022 10:13:06 AM by SYSTEM
Method Info     : MeOH/water
  
```

Sample Info : LJC 1-32 Re-synthesis

Additional Info : Peak(s) manually integrated

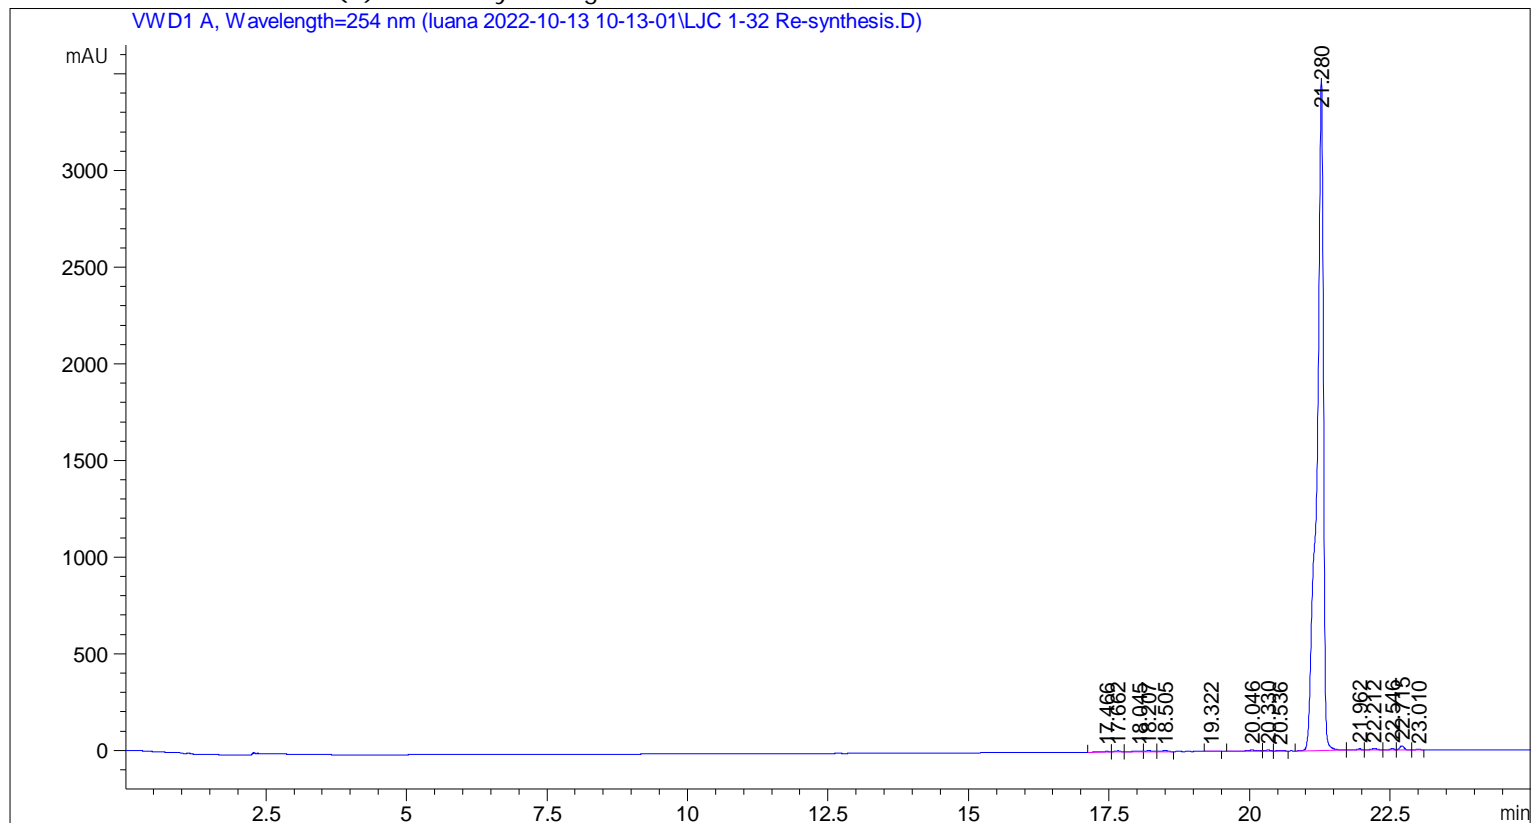

Area Percent Report

```

Sorted By      :      Signal
Multiplier     :      1.0000
Dilution       :      1.0000
Use Multiplier & Dilution Factor with ISTDs
  
```

Signal 1: VWD1 A, Wavelength=254 nm

| Peak # | RetTime [min] | Type | Width [min] | Area [mAU*s] | Height [mAU] | Area % |
|--------|---------------|------|-------------|--------------|--------------|--------|
| 1      | 17.466        | BV   | 0.1879      | 33.52855     | 2.50929      | 0.1170 |
| 2      | 17.662        | VB   | 0.0965      | 34.66453     | 5.28821      | 0.1210 |
| 3      | 18.045        | BV   | 0.1315      | 31.91075     | 3.36862      | 0.1114 |
| 4      | 18.207        | VV   | 0.1095      | 40.12352     | 5.28878      | 0.1401 |



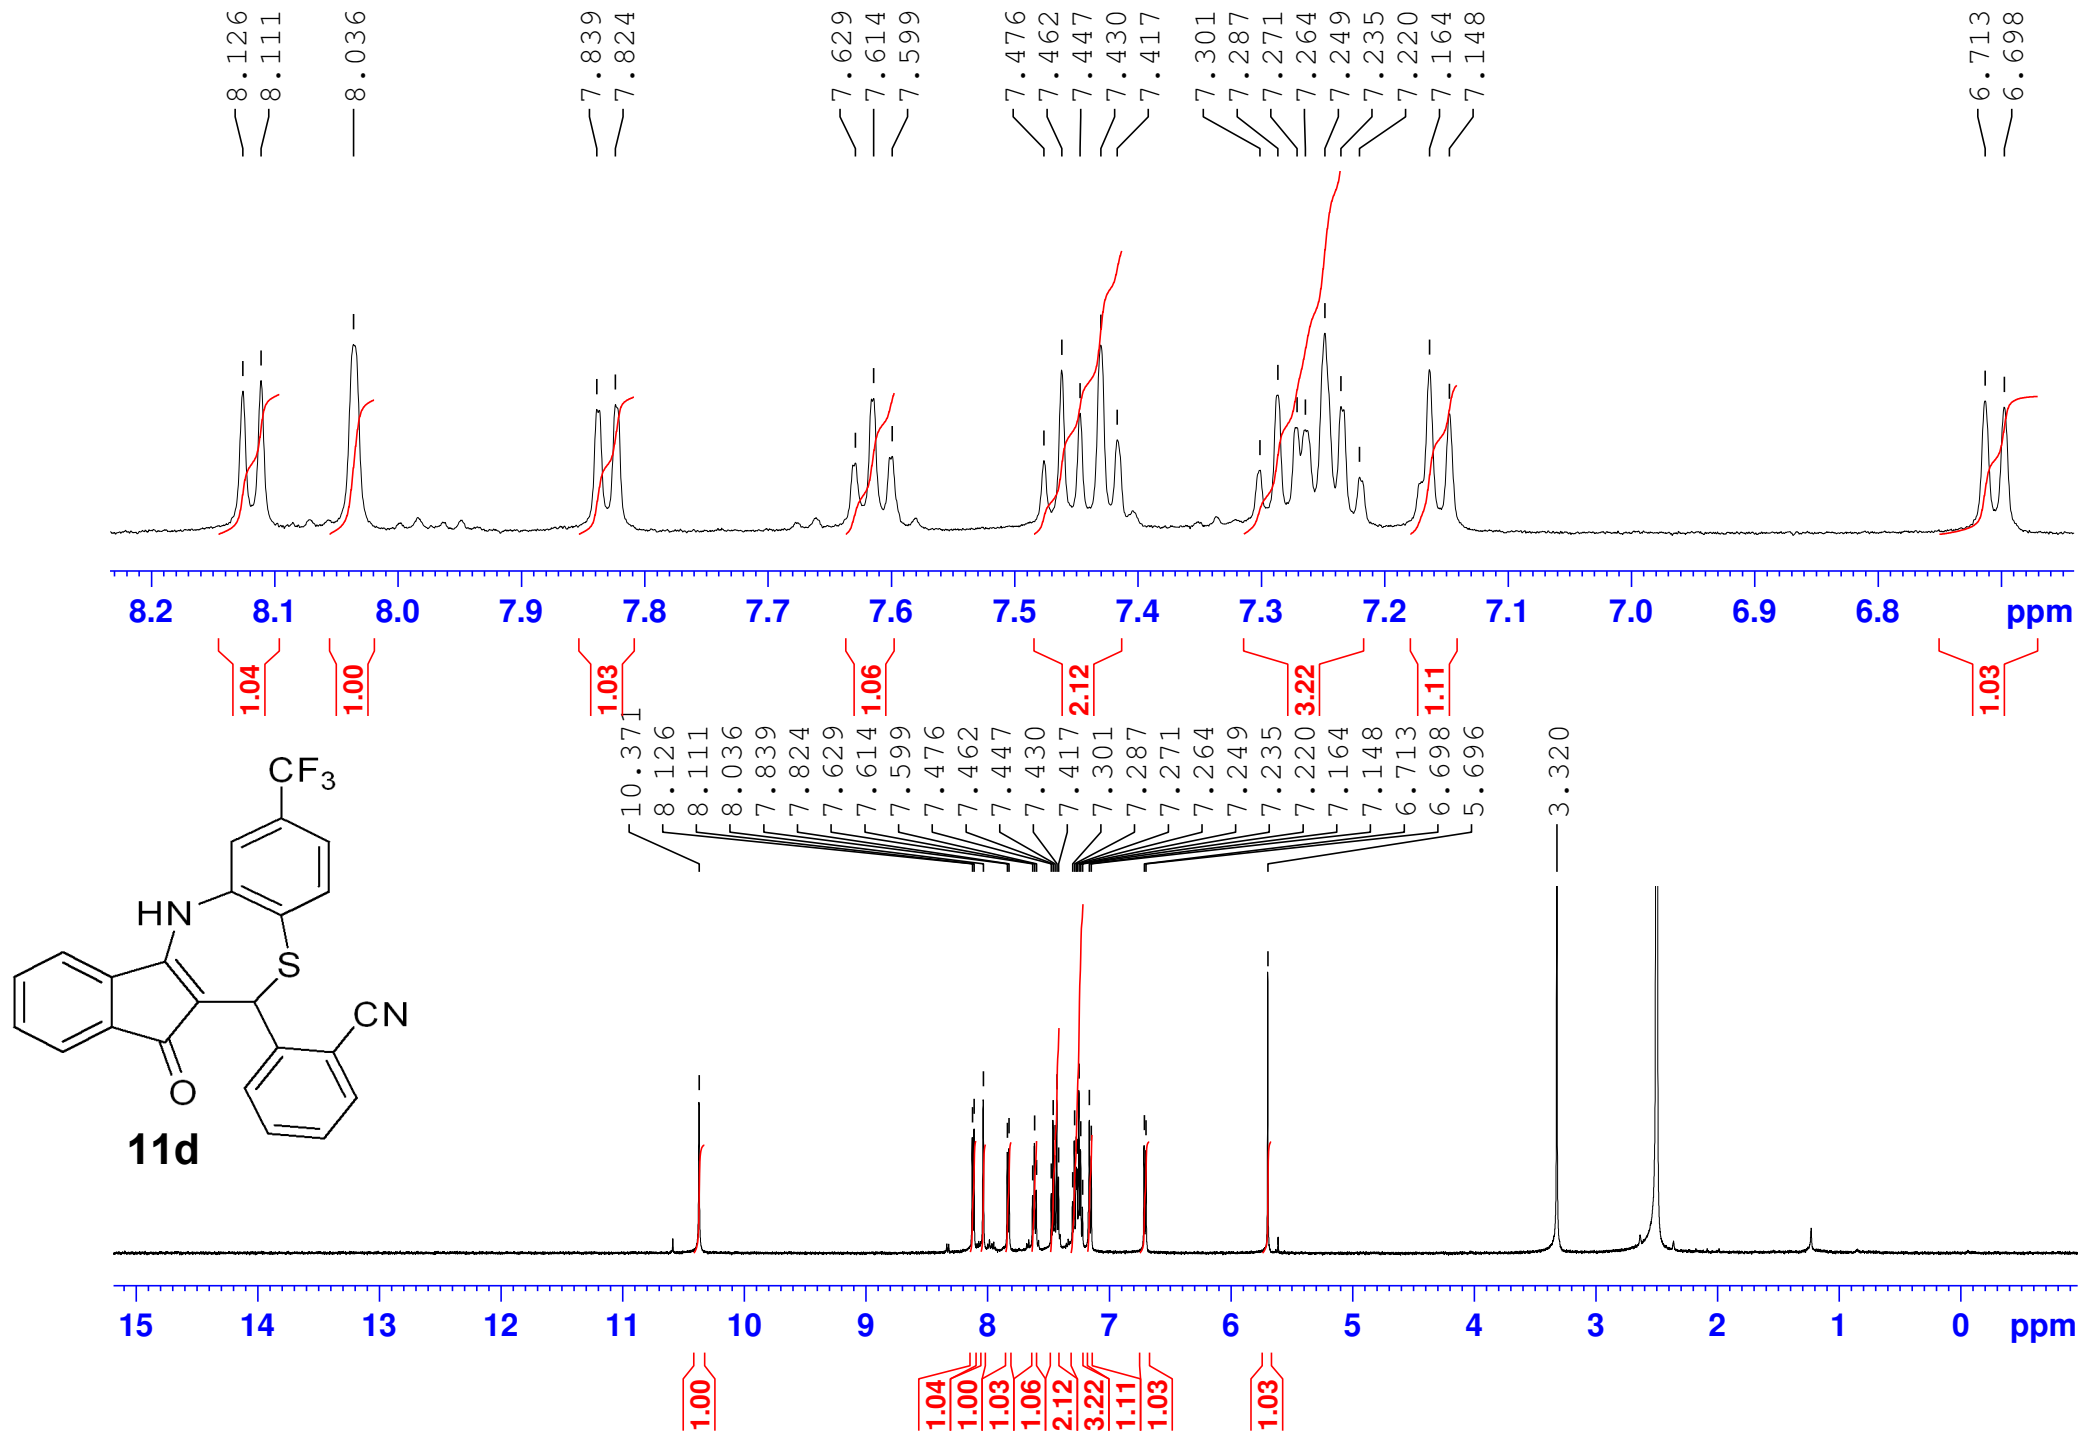

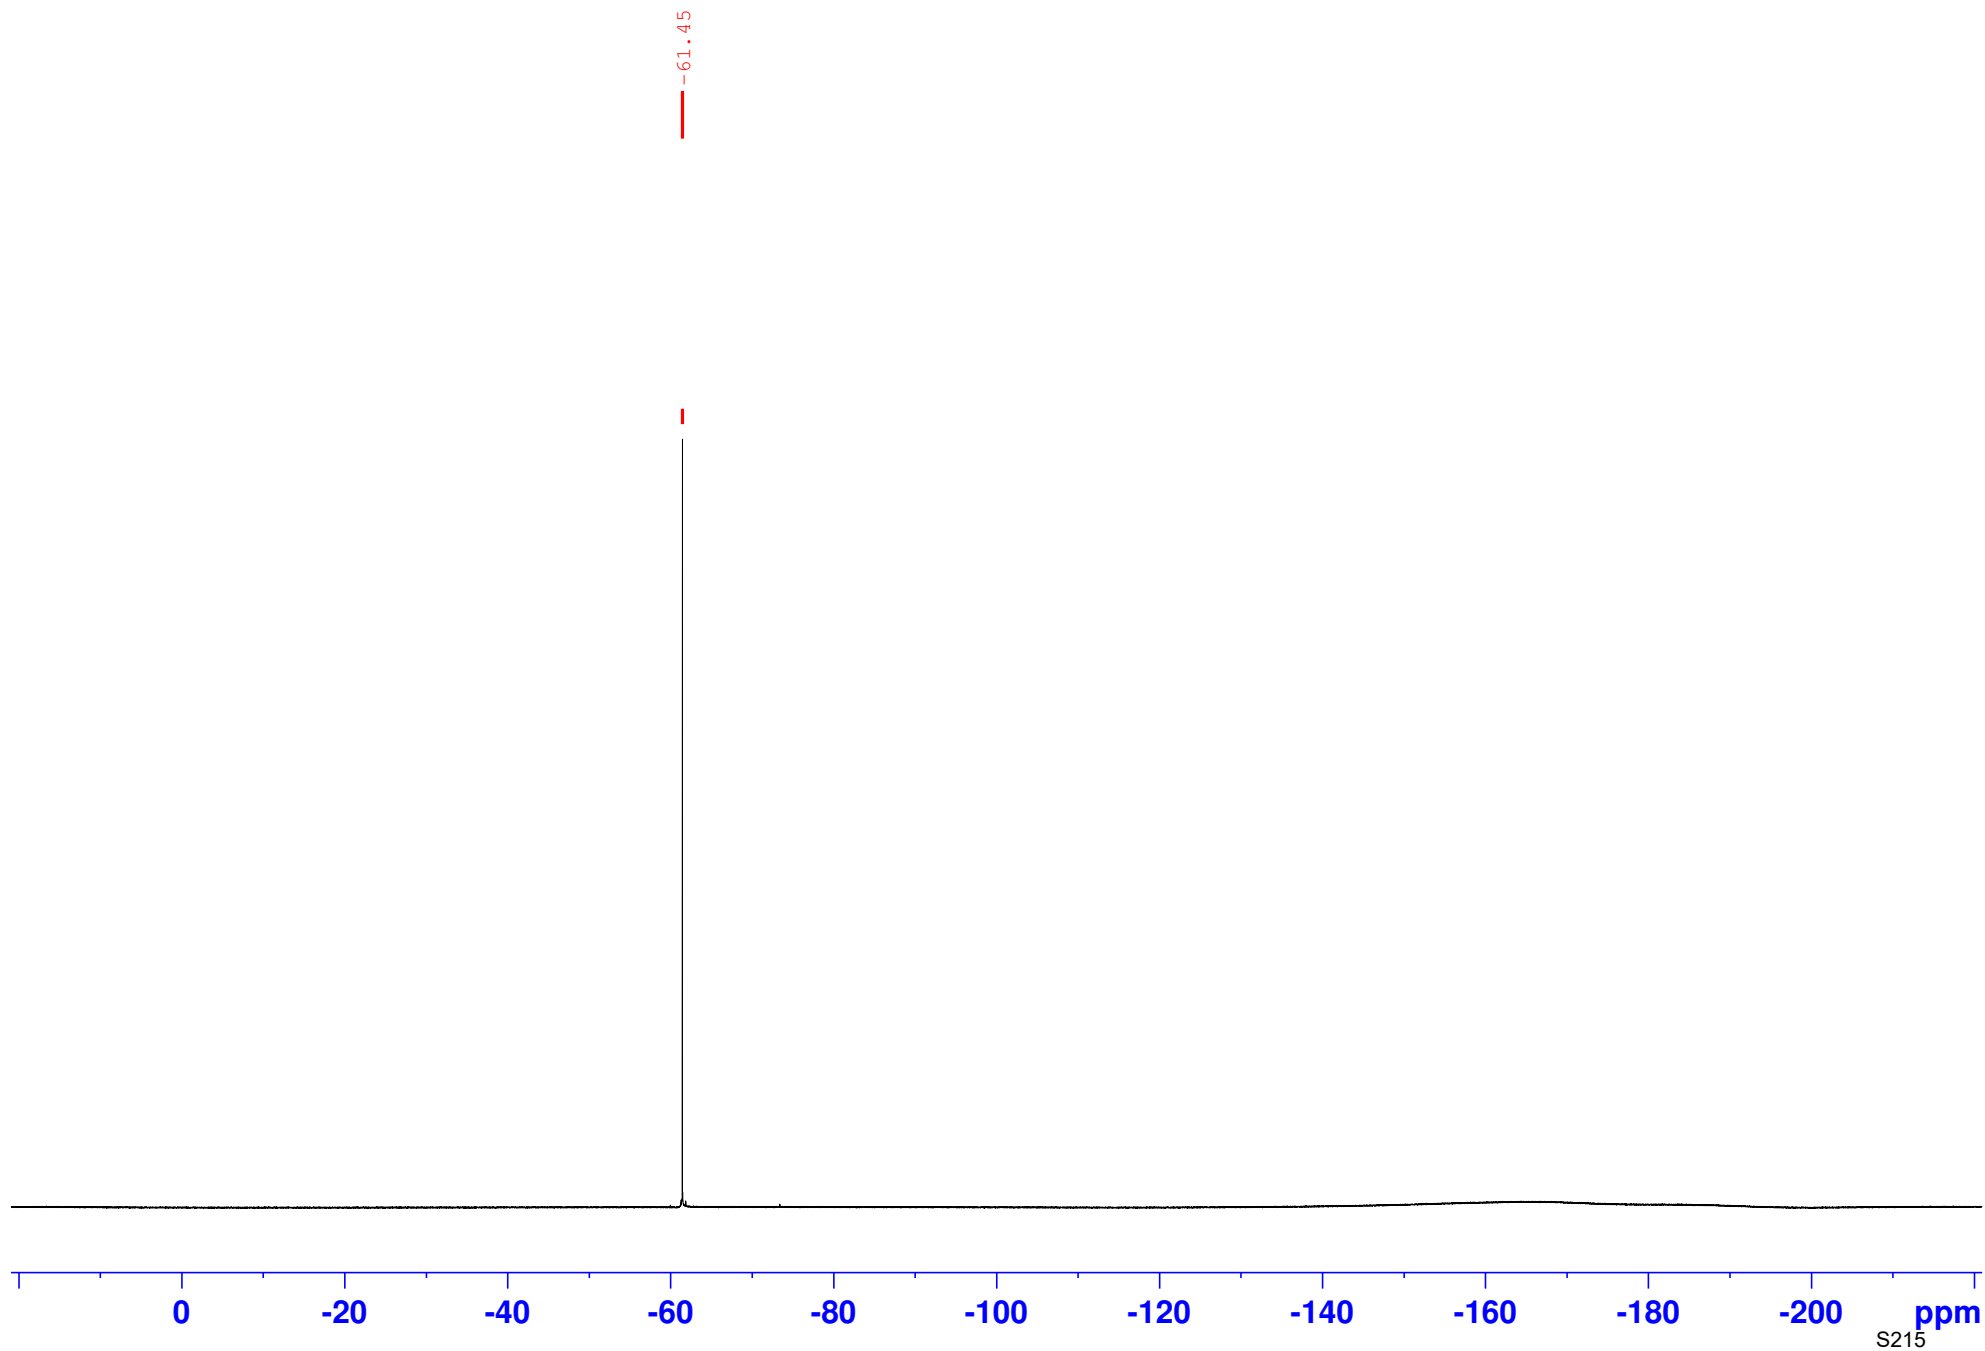

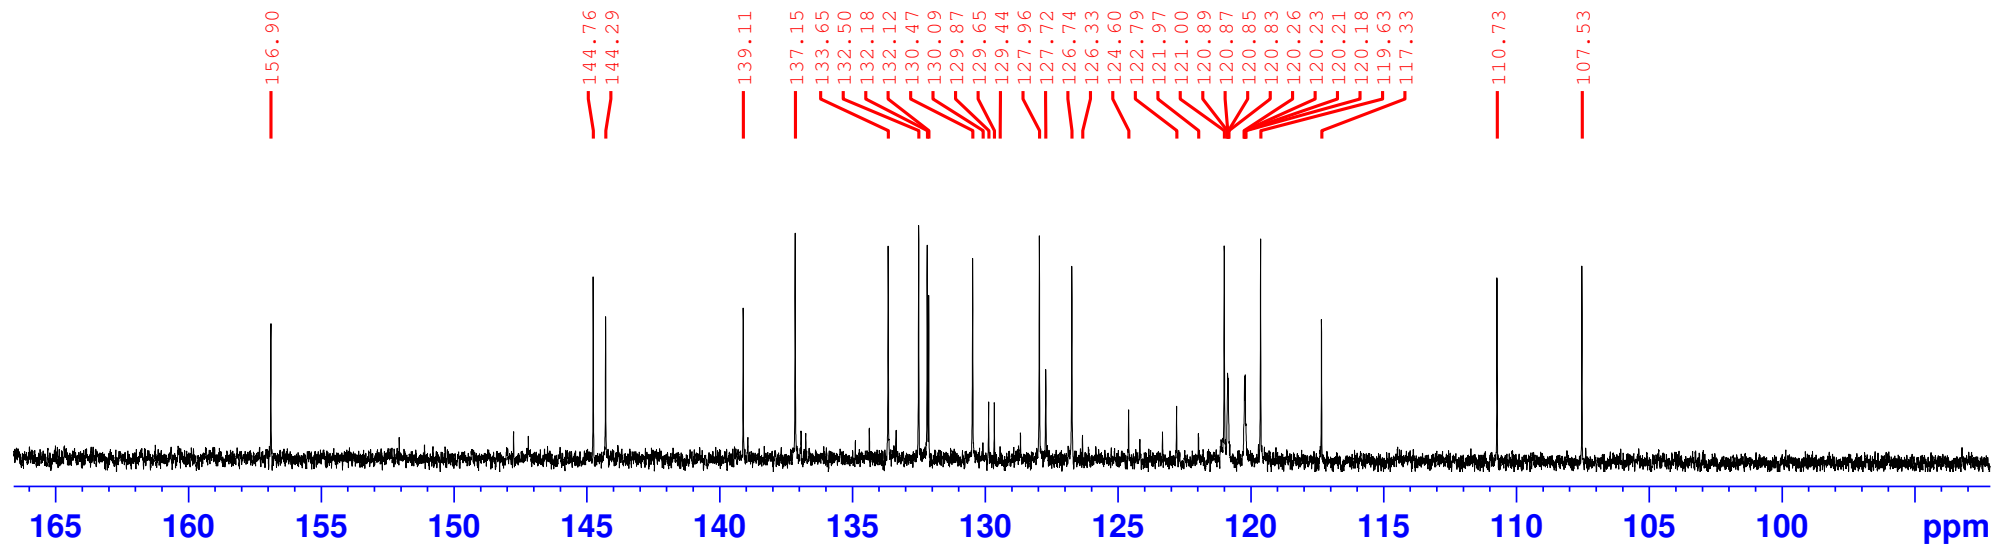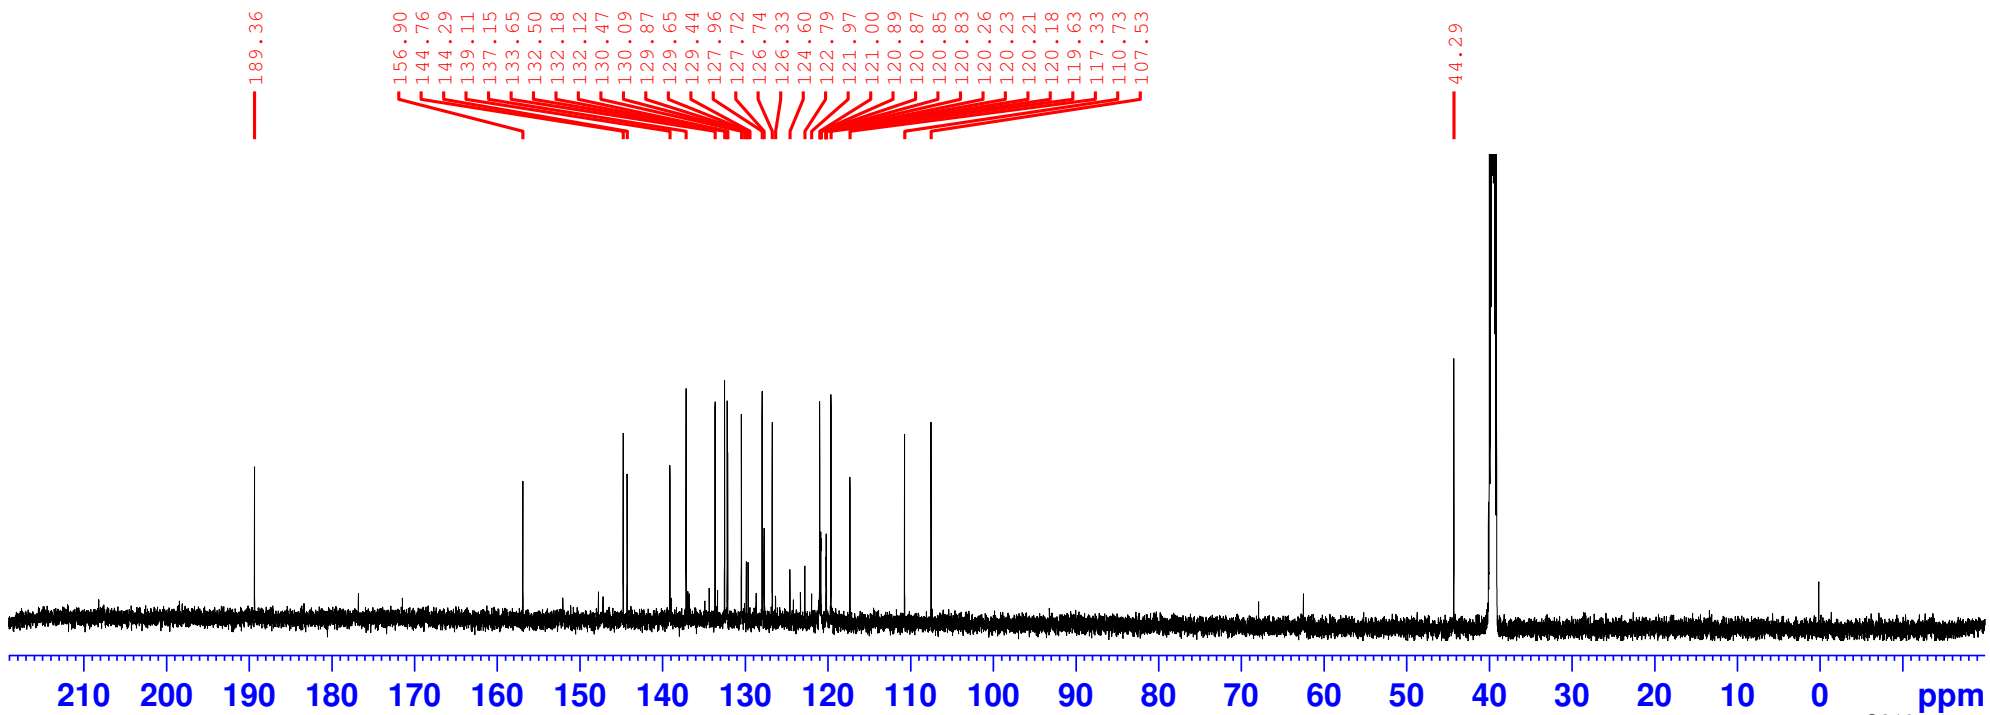



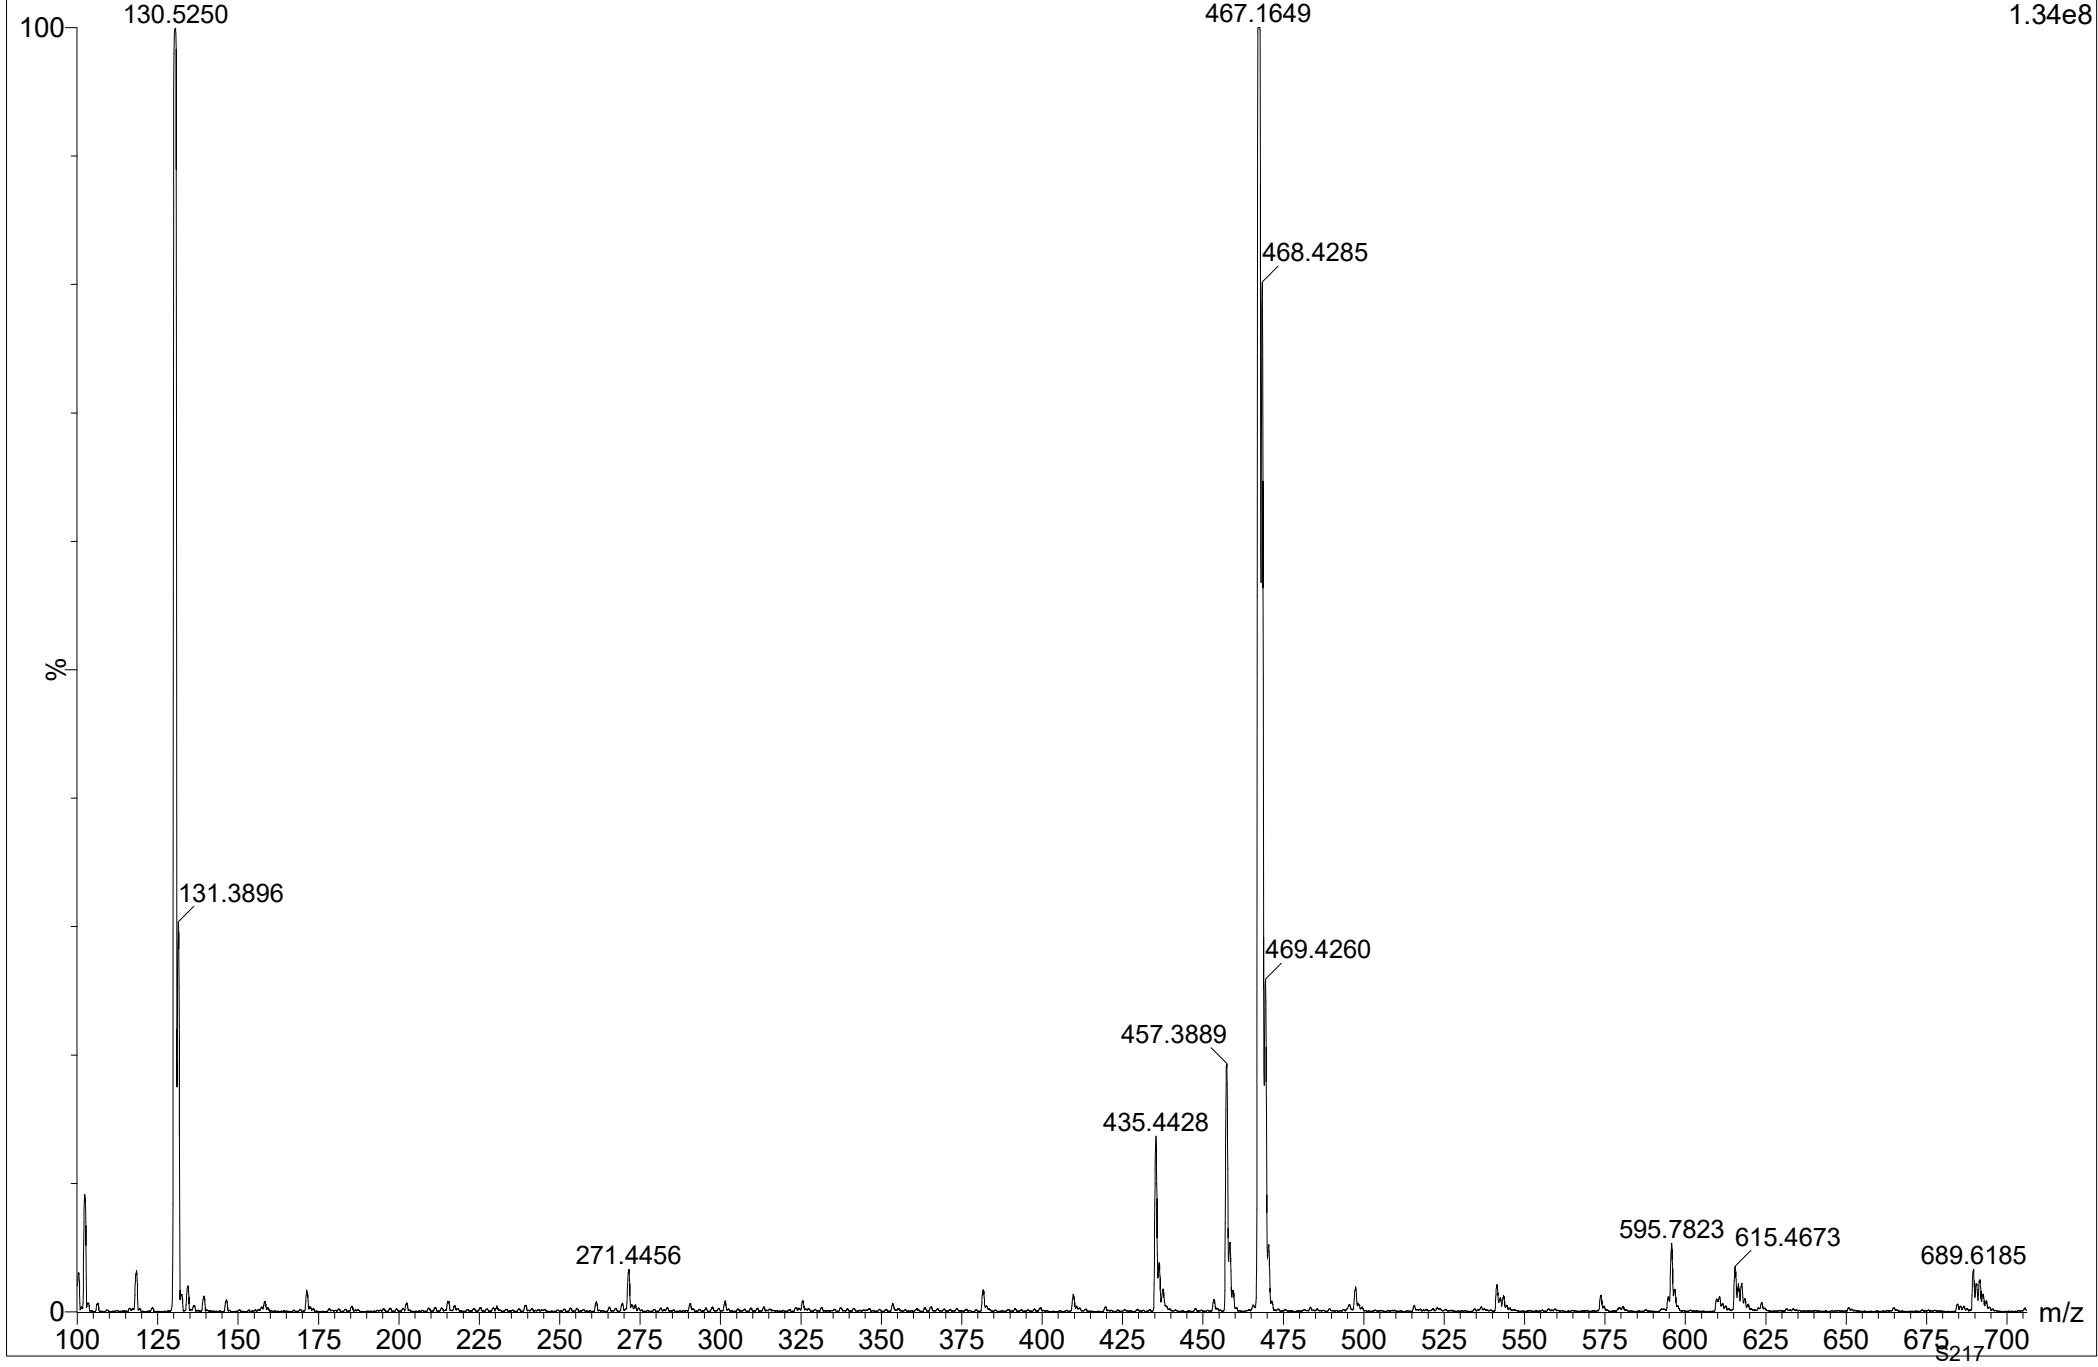

Sample Name: LJC 2-26

```

=====
Acq. Operator   : SYSTEM                      Seq. Line :    1
Acq. Instrument : 1220 HPLC                   Location  :   41
Injection Date  : 3/4/2022 2:22:12 PM        Inj       :    1
                                                Inj Volume: 70.000 µl
Different Inj Volume from Sample Entry! Actual Inj Volume : 50.000 µl
Method          : C:\Chem32\1\Data\luana 2022-03-04 14-20-46\Luana_small_molecule.M (Sequence
                :                               Method)
Last changed    : 3/4/2022 2:20:50 PM by SYSTEM
Method Info     : MeOH/water

Sample Info     : LJC 2-26
    
```

Additional Info : Peak(s) manually integrated

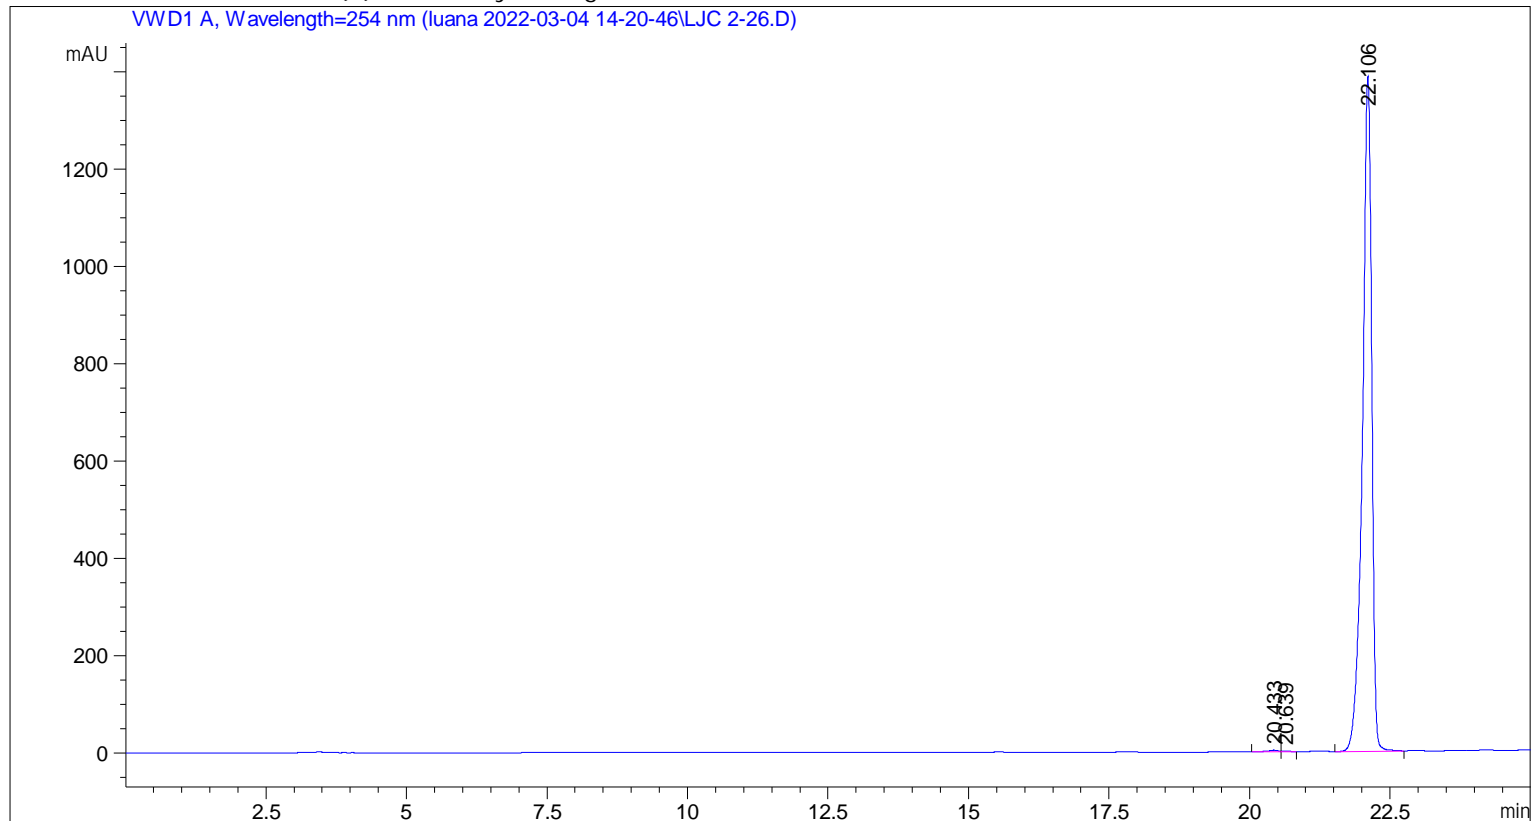

Area Percent Report

```

Sorted By      :      Signal
Multiplier     :      1.0000
Dilution      :      1.0000
Use Multiplier & Dilution Factor with ISTDs
    
```

Signal 1: VWD1 A, Wavelength=254 nm

| Peak # | RetTime [min] | Type | Width [min] | Area [mAU*s] | Height [mAU] | Area %  |
|--------|---------------|------|-------------|--------------|--------------|---------|
| 1      | 20.433        | VV   | 0.1916      | 47.67384     | 3.52861      | 0.2986  |
| 2      | 20.639        | VB   | 0.1433      | 17.11752     | 1.82795      | 0.1072  |
| 3      | 22.106        | BB   | 0.1727      | 1.58997e4    | 1386.95178   | 99.5942 |

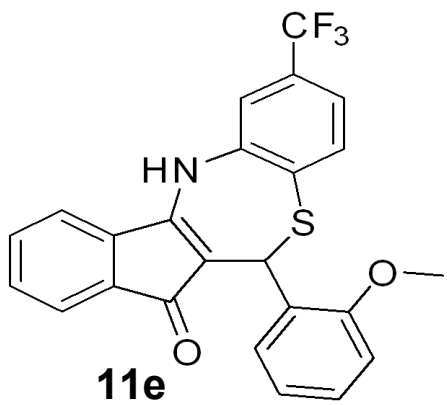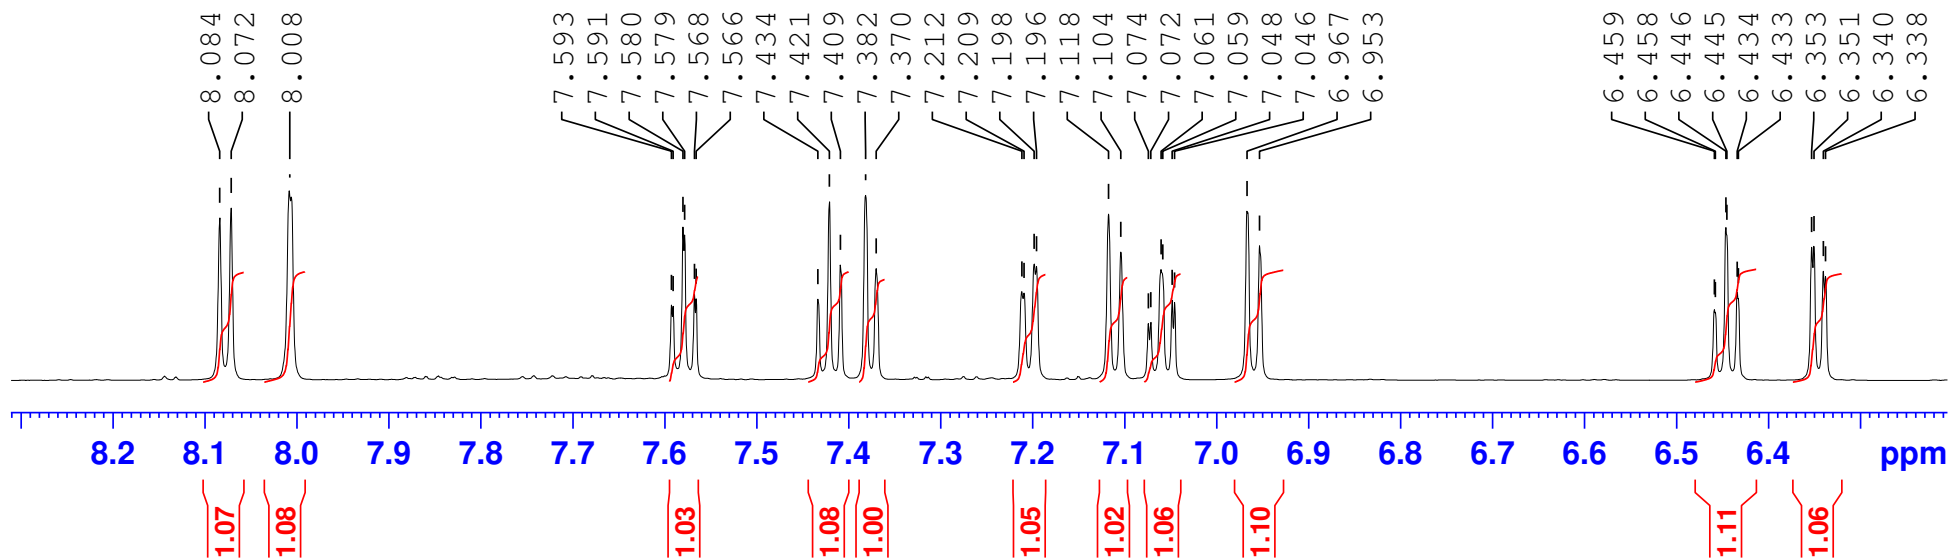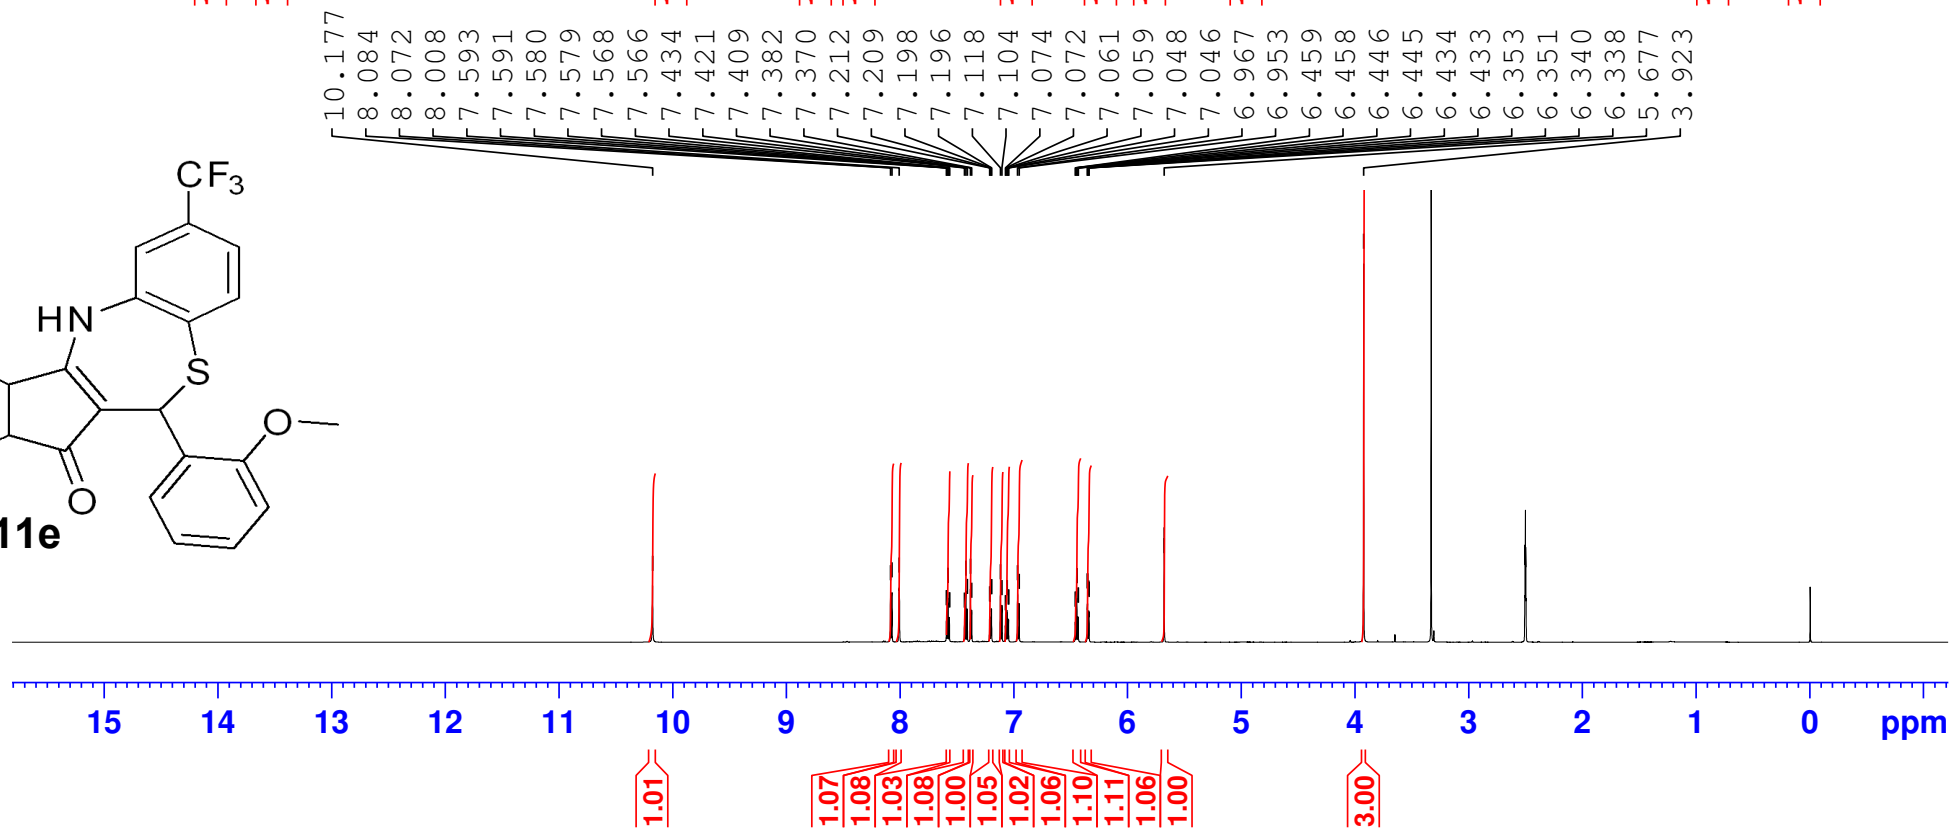

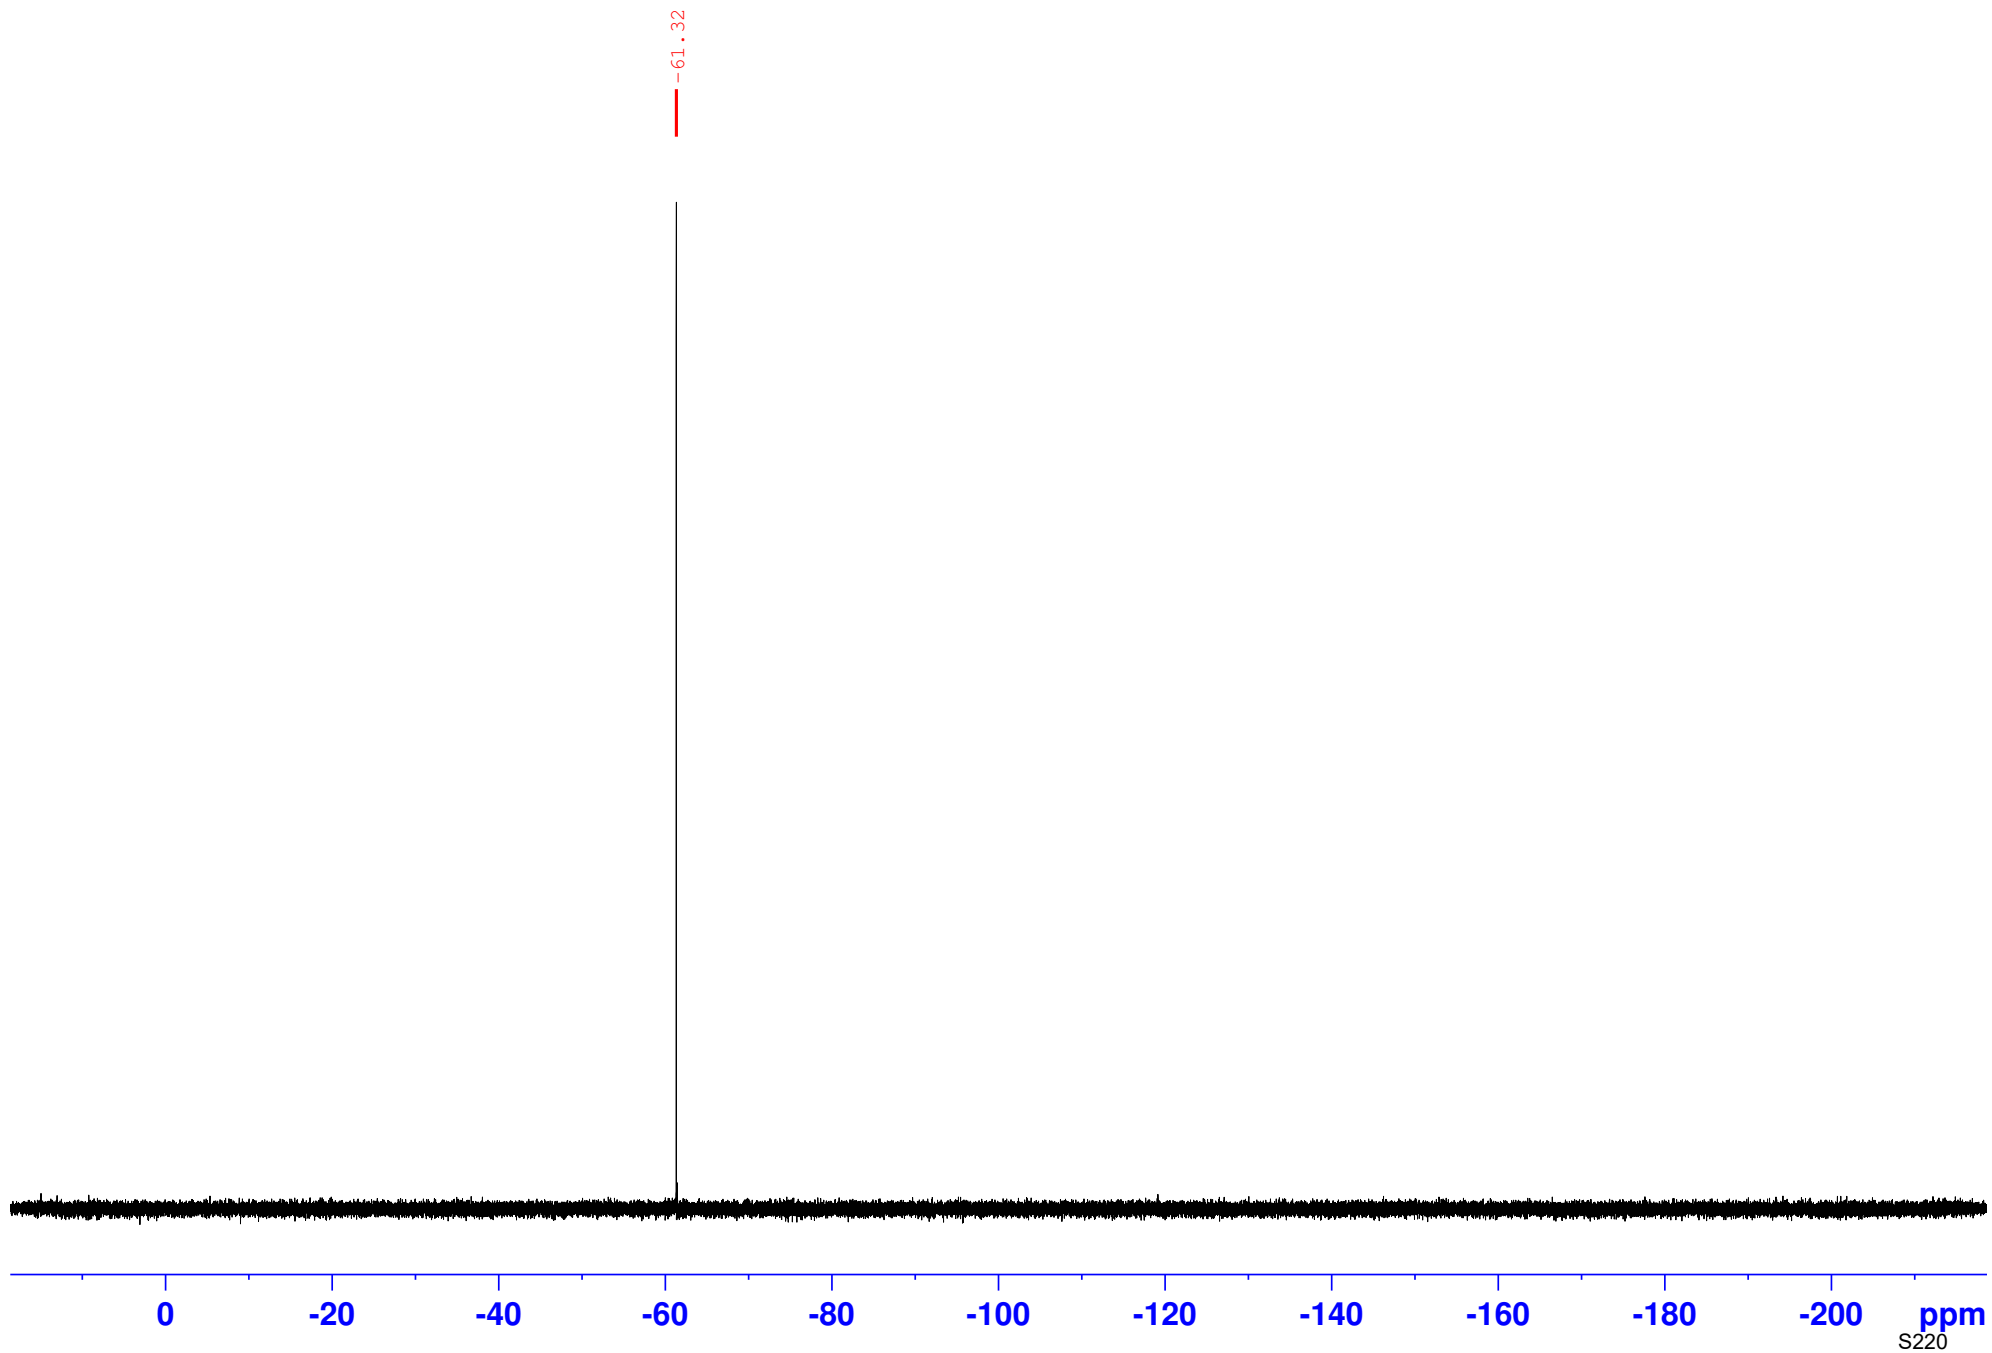

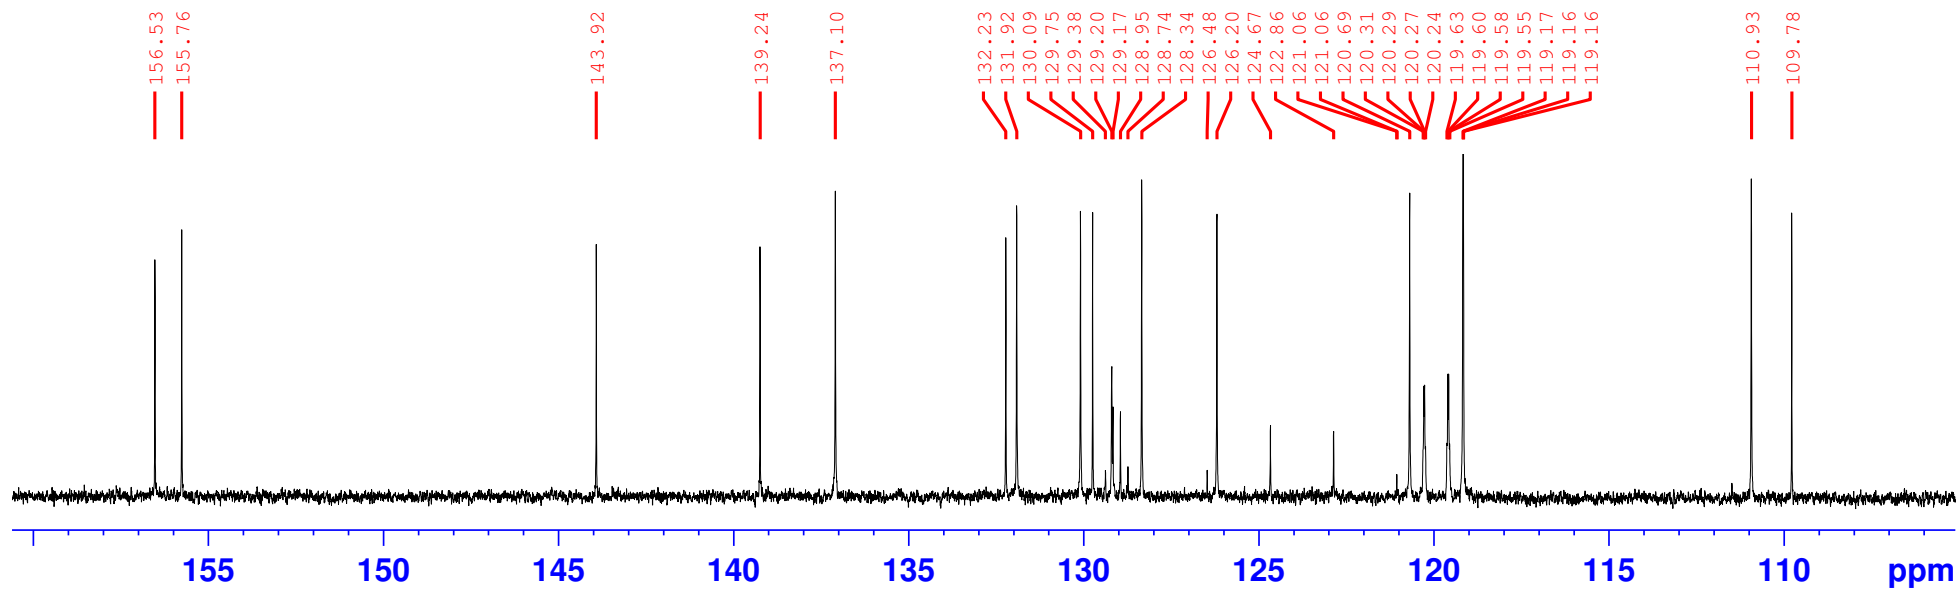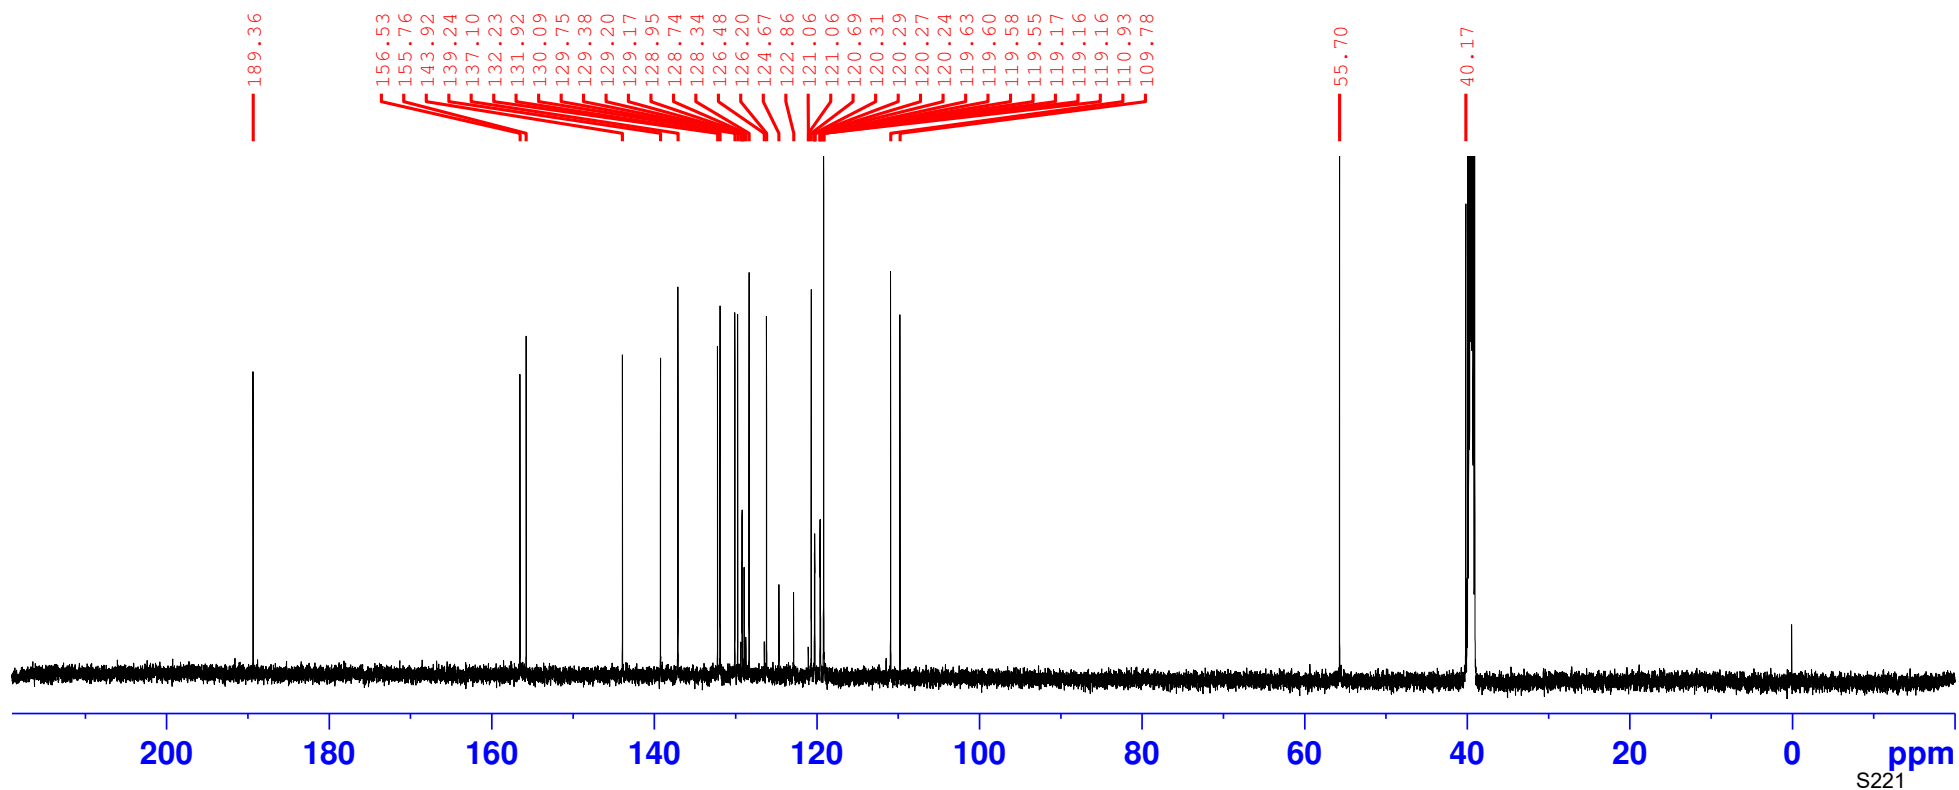

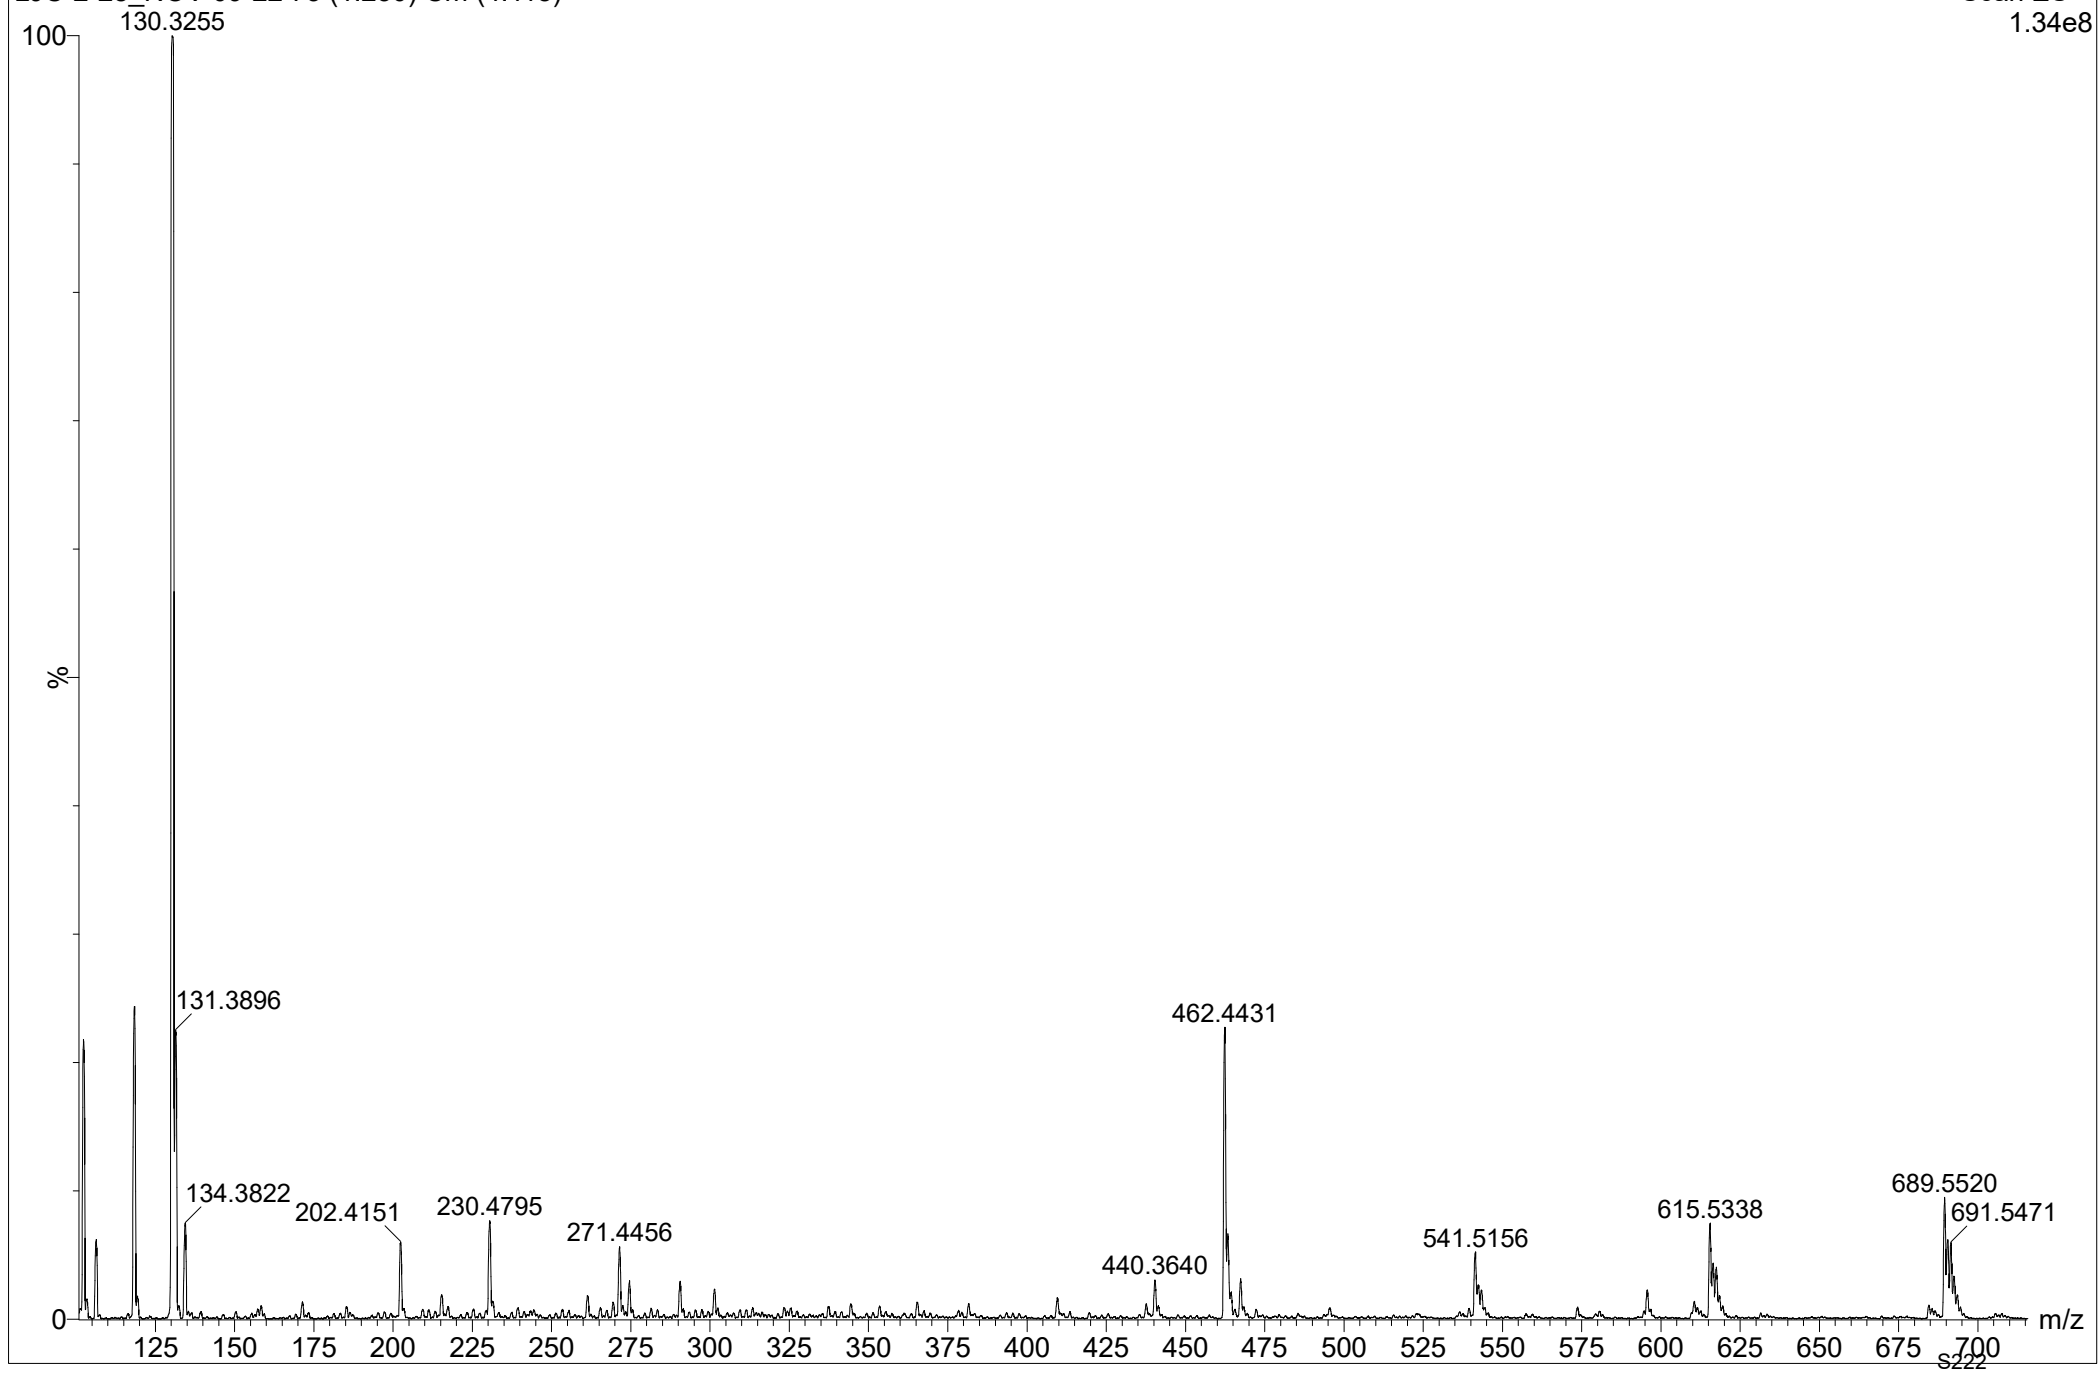

Sample Name: LJC 2-28

```

=====
Acq. Operator   : SYSTEM                      Seq. Line :    3
Acq. Instrument : 1220 HPLC                   Location  :   43
Injection Date  : 3/4/2022 3:16:31 PM        Inj       :    1
                                                Inj Volume: 70.000 µl
Different Inj Volume from Sample Entry! Actual Inj Volume : 50.000 µl
Method          : C:\Chem32\1\Data\luana 2022-03-04 14-20-46\Luana_small_molecule.M (Sequence Method)
Last changed    : 3/4/2022 2:20:50 PM by SYSTEM
Method Info     : MeOH/water

Sample Info     : LJC 2-28
    
```

Additional Info : Peak(s) manually integrated

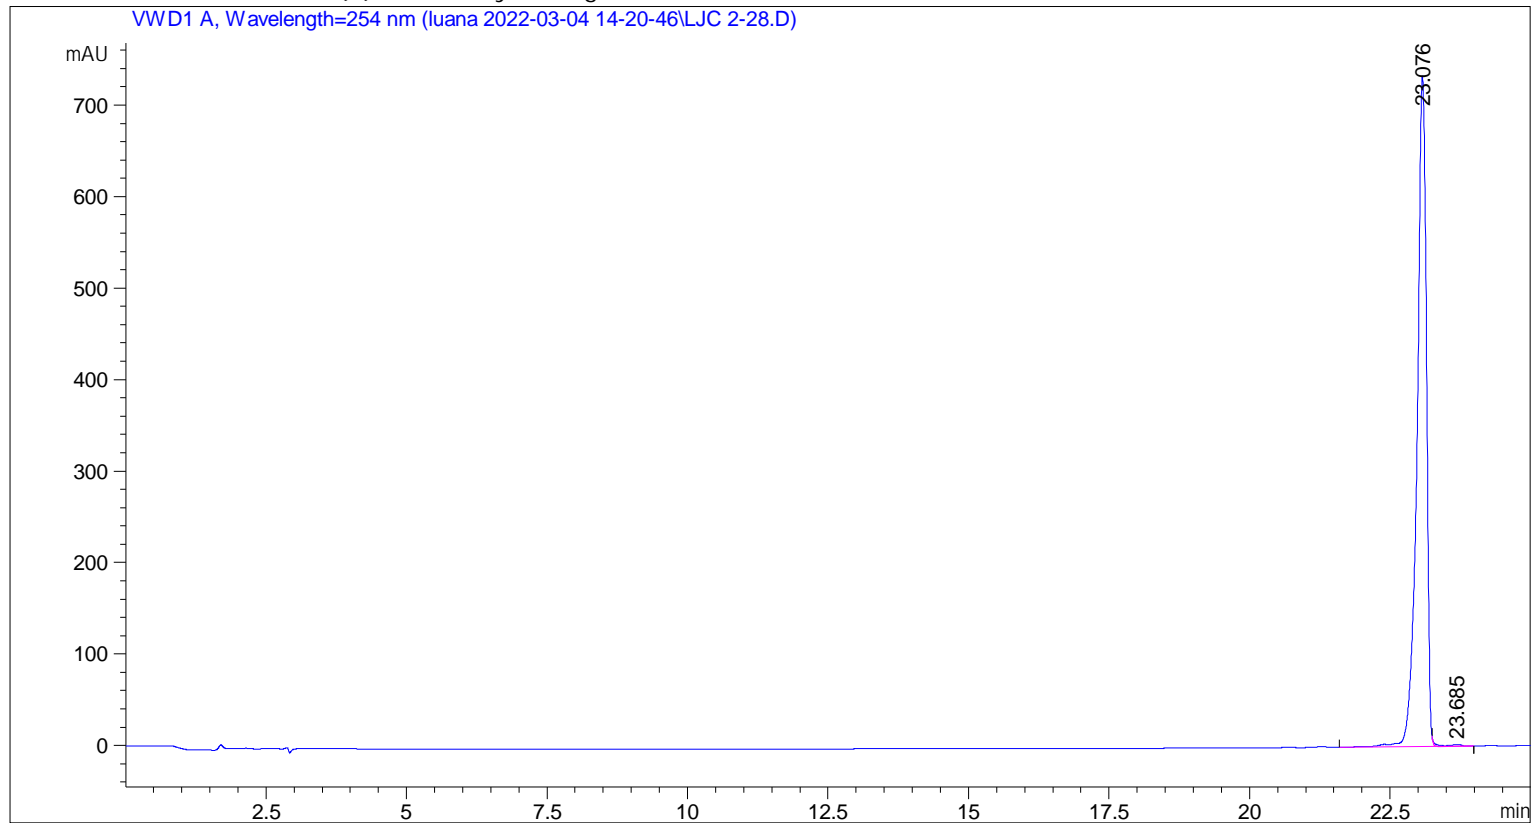

Area Percent Report

```

Sorted By      :      Signal
Multiplier     :      1.0000
Dilution       :      1.0000
Use Multiplier & Dilution Factor with ISTDs
    
```

Signal 1: VWD1 A, Wavelength=254 nm

| Peak # | RetTime [min] | Type | Width [min] | Area [mAU*s] | Height [mAU] | Area %  |
|--------|---------------|------|-------------|--------------|--------------|---------|
| 1      | 23.076        | VV R | 0.1774      | 8504.40430   | 732.51331    | 99.4797 |
| 2      | 23.685        | VB E | 0.2999      | 44.47955     | 2.02823      | 0.5203  |

Totals :                      8548.88384    734.54154

=====  
\*\*\* End of Report \*\*\*
